# Supplementary material
Source: PubMed Central journal article supplement (PMC9640225)

## Supporting Information

# Catalytic and Photochemical Strategies to Stabilized Radicals Based on Anomeric Nucleophiles

Feng Zhu,<sup>a</sup> Shuo-qing Zhang,<sup>b</sup> Zhenhao Chen,<sup>a</sup> Jinyan Rui,<sup>a</sup> Xin Hong,<sup>b\*</sup> Maciej A. Walczak<sup>a\*</sup>

<sup>a</sup>Department of Chemistry, University of Colorado, Boulder, CO 80309, United States

<sup>b</sup>Department of Chemistry, Zhejiang University, Hangzhou, Zhejiang 310027, P. R. China

\*hxchem@zju.edu.cn

\*maciej.walczak@colorado.edu

## Table of Contents

|                                                                                 |     |
|---------------------------------------------------------------------------------|-----|
| <b>1. GENERAL INFORMATION</b>                                                   | S3  |
| <b>2. GENERAL PROCEDURES</b>                                                    | S4  |
| <b>3. ADDITIONAL REACTION OPTIMIZATION CONDITIONS</b>                           | S5  |
| <b>4. DETAILED EXPERIMENTAL PROCEDURES FOR COMPOUNDS 17A-51</b>                 | S8  |
| <b>5. DETAILED EXPERIMENTAL PROCEDURES FOR COMPOUNDS S1- S13</b>                | S26 |
| <b>6. ADDITIONAL MECHANISTIC EXPERIMENTS</b>                                    | S32 |
| 6.1. Anomerization experiments with thioglycosidies and anomeric stannanes      | S32 |
| 6.2. Thioglycosylations with late transition metals                             | S32 |
| 6.3. Probing the role of Cu(II) in thermal and photochemical thioglycosylations | S33 |
| 6.4. Radical trapping experiments                                               | S33 |
| 6.5. Kinetic isotope effect experiments                                         | S34 |
| 6.6. NMR analysis of disulfide-bipyridine mixtures                              | S36 |
| 6.7. UV-VIS Absorption Spectra                                                  | S37 |
| <b>7. COMPUTATIONAL DETAILS</b>                                                 | S37 |
| <b>8. REFERENCES</b>                                                            | S59 |
| <b>9. COPIES OF 1D AND 2D NMR SPECTRA</b>                                       | S60 |

## 1. General Information

All chemicals were purchased as reagent grade and used without further purification unless otherwise noted. Solvents were filtered through a column of activated alumina prior to use. All reactions were carried out under anhydrous N<sub>2</sub> in oven-dried glassware. *m*-Xylene was distilled under nitrogen over sodium and degassed prior to use. Anhydrous 1,4-dioxane, 4,4'-di-*tert*-butyl-2,2'-dipyridyl and CuCl were purchased from Sigma-Aldrich. Aldrich® Micro Photochemical Reactors (5 W blue LED strips) were purchased from Sigma-Aldrich. Anhydrous KF was purchased from Strem Chemicals, Inc. Visualizations were performed with UV light and/or Hanessian stain and/or sulfuric acid stain (5% H<sub>2</sub>SO<sub>4</sub> in MeOH). Column chromatography was performed on silica gel (230-400 mesh). <sup>1</sup>H and <sup>13</sup>C NMR spectra were recorded on Bruker/Varian 300/400/500 MHz instruments and are reported as follows: chemical shift (δ), multiplicity (s = singlet, d = doublet, t = triplet, q =quartet, br = broad, m = multiplet), coupling constants (Hz), and integration. The residual solvent reference peaks were used from published literature. 2D NMR experiments were performed using standard parameters (*200 and More NMR Experiments*, S. Berger, S. Braun, Wiley-VCH, **2004**). IR measurements were performed on Agilent Cary 630 FT/IR instrument and optical rotations were measured on JASCO P-1030 and are reported as average of five data points. High-resolution mass spectra (HR-MS) were recorded on a Waters Synapt G2 HDMS q-TOF hybrid mass spectrometer. UV-vis spectra were recorded on Cary 5000 UV/Vis Spectrometer.

## 2. General Procedures

### General Procedure A for Cross-Coupling Reactions

Anomeric stannane (1.50 equiv), disulfide (1.00 equiv), and CuCl (300 mol%) were added to a one-dram vial with a screw-top septum, and the vial was then evacuated and refilled with N<sub>2</sub> (3x). Anhydrous m-xylene and 1,2-dichloroethane (2:1, 3.00 mL) were added and the reaction mixture was heated in an oil bath (130 °C) for the indicated period of time, cooled to rt, filtered through a pad of Celite®, and concentrated. <sup>1</sup>H NMR spectra were recorded using this mixture to evaluate diastereoselectivity. The crude material was purified by column chromatography on SiO<sub>2</sub>.

### General Procedure B for Cross-Coupling Reactions

Anomeric stannane (1.50 equiv), disulfide or *N*-arylthiosuccinimide (1.00 equiv), KF (3.00 equiv), 4,4'-di-*tert*-butyl-2,2'-dipyridyl or 2,2':6',2''-terpyridine (25 - 45 mol%), and CuCl (20 - 40 mol%) were added to a one-dram vial with a screw-top septum, and the vial was then evacuated and refilled with N<sub>2</sub> (3x). After anhydrous 1,4-dioxane (2.00 mL) were added, the reaction mixture was stirred at 120 °C under 5W blue LED irradiation for the indicated period of time. The resulting mixture was cooled to rt, filtered through a pad of Celite®, and concentrated. <sup>1</sup>H NMR spectra were recorded using this mixture to evaluate diastereoselectivity. The crude material was purified by column chromatography on SiO<sub>2</sub>.

### General Procedure C for Cross-Coupling Reactions

Anomeric stannane (1.50 equiv), disulfide (1.00 equiv), KF (3.00 equiv), and 4,4'-di-*tert*-butyl-2,2'-dipyridyl (45 mol%) were added to a one-dram vial with a screw-top septum, and the vial was then evacuated and refilled with N<sub>2</sub> (3x). After anhydrous 1,4-dioxane (2.00 mL) were added, the reaction mixture was stirred at 120 °C under 5W blue LED irradiation for the indicated period of time. The resulting mixture was cooled to rt, filtered through a pad of Celite®, and concentrated. <sup>1</sup>H NMR spectra were recorded using this mixture to evaluate diastereoselectivity. The crude material was purified by column chromatography on SiO<sub>2</sub>.

### Reaction set-up for photochemical thioglycosylations:

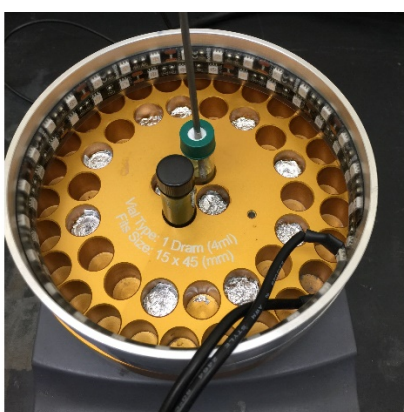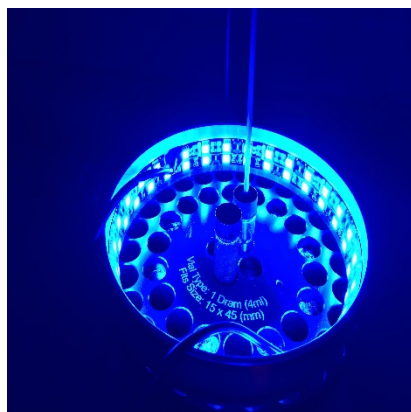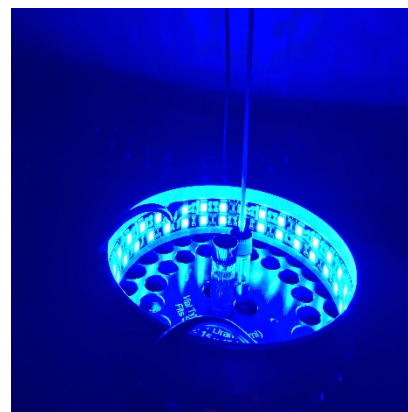

### 3. Additional Reaction Optimization Conditions

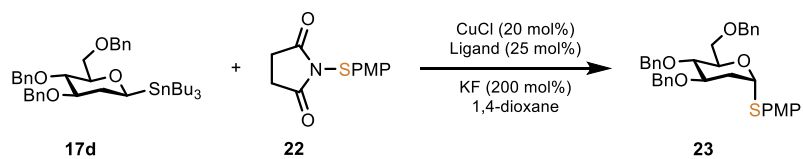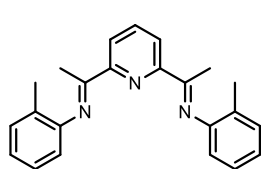

24%  $\alpha$ : $\beta$  6.5:1

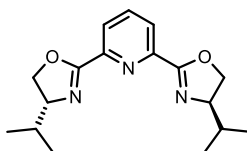

20%, only  $\alpha$

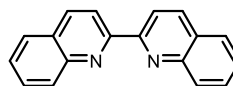

25%, only  $\alpha$

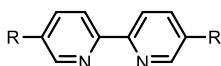

**L16**, R = OPiv, 41%  $\alpha$ : $\beta$  7.1:1

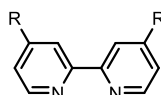

**L18**, R = *t*Bu, 31% only  $\alpha$   
**L19**, R = OMe, 25%  $\alpha$ : $\beta$  9.1:1  
**L20**, R = COO*i*Pr, 31%  $\alpha$ : $\beta$  7.1:1  
**L21**, R = CF<sub>3</sub>, 21%  $\alpha$ : $\beta$  3.4:1

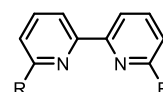

**L23**, R = OMe, 32%  $\alpha$ : $\beta$  2.8:1  
**L24**, R = OPiv, 25% only  $\alpha$   
**L25**, R = COO*i*Pr, 31%  $\alpha$ : $\beta$  7.1:1

**Reaction conditions:** **22** (0.100 mmol, 1.0 equiv), **17d** (1.5 equiv), CuCl (20 mol%), Ligand (25 mol%) and 1,4-dioxane (2.0 mL) under N<sub>2</sub>, 130 °C, 24h, yield of isolated product. Anomeric selectivities determined by <sup>1</sup>H NMR analysis of unpurified reaction mixtures.

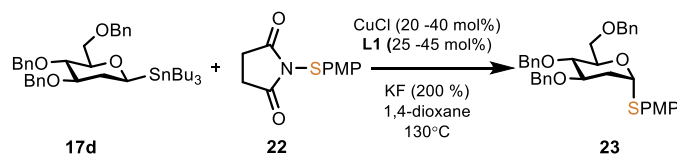

| Entry               | Catalyst                         | Additives      | Solvent             | Yield | $\alpha:\beta$ |
|---------------------|----------------------------------|----------------|---------------------|-------|----------------|
| 1 <sup>a</sup>      | CuCl (20 mol%)                   | KF (300 mol%)  | Dioxane             | 31%   | Only $\alpha$  |
| 2 <sup>a</sup>      | CuCl (20 mol%)                   | KF (300 mol%)  | Dioxane/Xylene(1:1) | 32%   | Only $\alpha$  |
| 3 <sup>a</sup>      | CuCl (20 mol%)                   | LiF (300 mol%) | Dioxane/Xylene(1:1) | 36%   | Only $\alpha$  |
| 4 <sup>a</sup>      | CuCl (20 mol%)                   | CsF (300 mol%) | Dioxane/Xylene(1:1) | 19%   | Only $\alpha$  |
| 5                   | CuCl (40 mol%)                   | KF (300 mol%)  | Dioxane/Xylene(1:1) | 52%   | Only $\alpha$  |
| 6                   | CuCl (40 mol%)                   | LiF (300 mol%) | Dioxane/Xylene(1:1) | 44%   | Only $\alpha$  |
| 7                   | CuBr (40 mol%)                   | KF (300 mol%)  | Dioxane/Xylene(1:1) | 41%   | Only $\alpha$  |
| 8                   | CuI (40 mol%)                    | KF (300 mol%)  | Dioxane/Xylene(1:1) | <5%   | Only $\alpha$  |
| 9                   | CuTc (40 mol%)                   | KF (300 mol%)  | Dioxane/Xylene(1:1) | 38%   | Only $\alpha$  |
| 10                  | CuOP(O)Ph <sub>2</sub> (40 mol%) | KF (300 mol%)  | Dioxane/Xylene(1:1) | 27%   | Only $\alpha$  |
| 11                  | CuCl <sub>2</sub> (40 mol%)      | KF (300 mol%)  | Dioxane/Xylene(1:1) | N.D.  | N.A.           |
| 12 <sup>b</sup>     | CuCl (40 mol%)                   | KF (300 mol%)  | Dioxane/Xylene(1:1) | 28%   | Only $\alpha$  |
| 13 <sup>c</sup>     | CuCl (40 mol%)                   | KF (300 mol%)  | Dioxane/Xylene(1:1) | 50%   | Only $\alpha$  |
| 14 <sup>c,d</sup>   | CuCl (40 mol%)                   | KF (300 mol%)  | Dioxane/Xylene(1:1) | 50%   | >30:1          |
| 15 <sup>e</sup>     | CuCl (40 mol%)                   | KF (300 mol%)  | Dioxane/Xylene(1:1) | 36%   | Only $\alpha$  |
| 16                  | CuCl (50 mol%)                   | KF (300 mol%)  | Dioxane/Xylene(1:1) | 50%   | Only $\alpha$  |
| 17 <sup>f</sup>     | CuCl (40 mol%)                   | KF (300 mol%)  | Dioxane/Xylene(1:1) | 52%   | Only $\alpha$  |
| 18 <sup>f,g</sup>   | CuCl (40 mol%)                   | KF (300 mol%)  | Dioxane             | 21%   | Only $\alpha$  |
| 19 <sup>c,f,g</sup> | CuCl (40 mol%)                   | KF (300 mol%)  | Dioxane             | 54%   | Only $\alpha$  |
| 20 <sup>g,h</sup>   | CuCl (40 mol%)                   | KF (300 mol%)  | Dioxane             | 73%   | Only $\alpha$  |
| 21 <sup>g,i</sup>   | CuCl (20 mol%)                   | KF (300 mol%)  | Dioxane             | 74%   | Only $\alpha$  |
| 22 <sup>ij</sup>    |                                  | KF (300 mol%)  | Dioxane             | N.D.  | N.A.           |
| 23 <sup>k</sup>     | CuCl (40 mol%)                   | KF (300 mol%)  | Dioxane             | 52%   | Only $\alpha$  |

**General reaction conditions:**  $\beta$ -D-glucose **17d** (1.5 equiv), sulfur electrophile (1 equiv), CuCl (20 - 40 mol%), terpyridine **L1** (25 – 45 mol%), 1,4-dioxane/*m*-xylene (1:1, 2.0 mL) under N<sub>2</sub>, 130 °C, 96 h, yield of isolated product, anomeric selectivities determined by <sup>1</sup>H NMR using unpurified reactions mixtures. <sup>a</sup> 24 h. <sup>b</sup>Sulfur electrophile **24** (1 equiv) was used. <sup>c</sup>Sulfur electrophile **18** (1 equiv) was used. <sup>d</sup>Terpyridine **L1** (40 mol%) were used. <sup>e</sup>Sulfur electrophile **25** was used. <sup>f</sup>Terpyridine **L1** (45 mol%), 120 °C, 96 h. <sup>g</sup>Blue LED irradiation was used. <sup>h</sup>Sulfur electrophile **18** (1 equiv), dtbbpy **L11** (45 mol%), 130 °C, 96 h. <sup>i</sup>Sulfur electrophile **18** (1 equiv), dtbbpy **L11** (25 mol%), 120 °C, 96 h. <sup>j</sup>Without CuCl and blue LED irradiation. <sup>k</sup>Sulfur electrophile **18** (1 equiv), dtbbpy **L11** (45 mol%), 120 °C, 96 h, without blue LED irradiation.

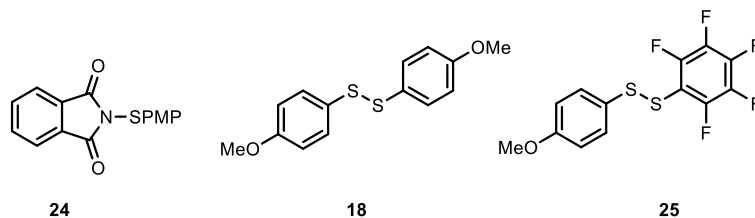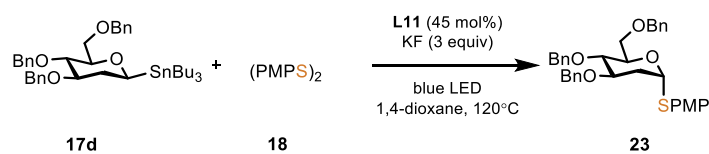

| Entry | Variation from standard conditions | Yield | $\alpha:\beta$ |
|-------|------------------------------------|-------|----------------|
| 1     | none                               | 72%   | Only $\alpha$  |
| 2     | no blue LED                        | N.D.  | -----          |
| 3     | no <b>L11</b>                      | 50%   | Only $\alpha$  |
| 4     | no KF                              | 61%   | Only $\alpha$  |
| 5     | no blue KF and <b>L11</b>          | 50%   | Only $\alpha$  |
| 6     | DMAP instead of <b>L11</b>         | 46%   | Only $\alpha$  |
| 7     | toluene as solvent                 | 43%   | Only $\alpha$  |
| 8     | MeCN as solvent                    | 50%   | Only $\alpha$  |
| 9     | <i>t</i> BuOH as solvent           | 38%   | Only $\alpha$  |
| 10    | DMF as solvent                     | N.D.  | N.A.           |
| 11    | room temperature was employed      | 15%   | Only $\alpha$  |
| 12    | <i>t</i> BuOH as solvent           | 38%   | Only $\alpha$  |
| 13    | 4-Methoxybenzenethiol was employed | N.D.  | -----          |
| 14    | <b>22</b> was employed             | N.D.  | -----          |
| 15    | 390 nm was employed                | 33%   | Only $\alpha$  |

**General reaction conditions:** disulfide (0.100 mmol, 1 equiv), anomeric stannanes (1.5 equiv), **L11** (45 mol%), KF (3 equiv), blue LED (5W), 1,4-dioxane (2 mL), 120 °C, 48 h, yield of isolated product, anomeric selectivities determined by <sup>1</sup>H NMR using unpurified reactions mixtures.

#### 4. Detailed Experimental Procedures for Compounds 17a-51

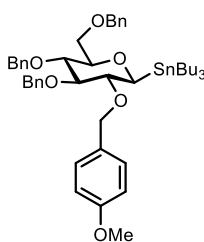

17a

**(2-*O*-(4-Methoxybenzyl)-3,4,6-tri-*O*-benzyl- $\beta$ -D-glucopyranosyl)tri-*n*-butylstannane (17a).** To a solution of (3,4,6-tri-*O*-benzyl- $\beta$ -D-glucopyranosyl)tri-*n*-butylstannane (300 mg, 0.41 mmol) in THF (3.00 mL) KHMDS (1.00 mL, 0.500 mmol, 0.5 M in PhMe) was added under N<sub>2</sub> at rt. After stirring for 0.5 h, 4-methoxybenzyl chloride (0.82 mmol, 0.110 mL) was added to the reaction mixture and stirred 12 h. The crude mixture was purified by chromatographic purification on SiO<sub>2</sub> (Hexanes:EtOAc, 15:1) to afford product **17a** (304.4 mg, 88%) as a light yellow oil:  $[\alpha]_D^{25} = -4.0$  ( $c = 0.40$ , CHCl<sub>3</sub>); IR (ATR)  $\nu = 3029, 2959, 2921, 2863, 1733, 1490, 1458, 1360, 1240, 1094, 730, 700$  cm<sup>-1</sup>; <sup>1</sup>H NMR (300 MHz, CDCl<sub>3</sub>)  $\delta$  7.37 - 7.26 (m, 13H), 7.25 - 7.16 (m, 4H), 6.87 - 6.79 (m, 2H), 4.99 - 4.94 (m, 2H), 4.88 - 4.81 (m, 2H), 4.68 - 4.53 (m, 4H), 3.79 (s, 3H), 3.75 - 3.59 (m, 5H), 3.49 (d,  $J = 10.8$  Hz, 1H), 3.30 - 3.26 (m, 1H), 1.54 - 1.37 (m, 6H), 1.33 - 1.20 (m, 6H), 0.96 - 0.73 (m, 15H); <sup>13</sup>C NMR (75 MHz, CDCl<sub>3</sub>)  $\delta$  159.2, 138.9, 138.6, 130.9, 129.3, 128.6, 128.5, 128.4, 128.1, 127.8 (2), 127.7, 127.6, 127.5, 113.8, 89.7, 83.4, 81.6, 79.4, 75.5, 75.2, 74.9, 74.2, 73.6, 69.7, 55.4, 29.3, 27.6, 13.8, 9.3; HRMS (ESI)  $m/z$  calcd for C<sub>47</sub>H<sub>64</sub>O<sub>6</sub>SnNa [M + Na]<sup>+</sup> 867.3617, found 867.3623.

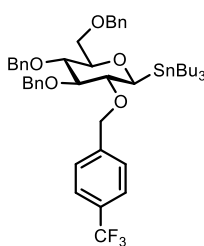

17b

**(2-*O*-(4-(Trifluoromethyl)benzyl)-3,4,6-tri-*O*-benzyl- $\beta$ -D-glucopyranosyl)tri-*n*-butylstannane (17b).** To a solution of (3,4,6-tri-*O*-benzyl- $\beta$ -D-glucopyranosyl)tri-*n*-butylstannane (300 mg, 0.41 mmol) in THF (3.00 mL) KHMDS (1.00 mL, 0.500 mmol, 0.5 M in PhMe) was added under N<sub>2</sub> at rt. After stirring for 0.5 h, 4-(trifluoromethyl)benzyl chloride (0.82 mmol, 0.120 mL) was added to the reaction mixture and stirred 12 h. The crude mixture was purified by chromatographic purification on SiO<sub>2</sub> (Hexanes:EtOAc, 20:1) to afford the product **17b** (202 mg, 56%) as a light yellow oil:  $[\alpha]_D^{25} = -4.2$  ( $c = 0.30$ , CHCl<sub>3</sub>); IR (ATR)  $\nu = 3032, 2960, 2920, 2863, 1743, 1480, 1458, 1367, 1250, 1102, 730, 695$  cm<sup>-1</sup>; <sup>1</sup>H NMR (300 MHz, CDCl<sub>3</sub>)  $\delta$  7.55 (d,  $J = 8.1$  Hz, 2H), 7.37 - 7.23 (m, 17H), 5.11 (d,  $J = 12.3$  Hz, 1H), 4.96 (d,  $J = 11.0$  Hz, 1H), 4.84 (d,  $J = 10.9$  Hz,



1H), 4.73 (d,  $J = 11.1$  Hz, 1H), 4.70 - 4.57 (m, 4H), 3.79 - 3.60 (m, 5H), 3.52 (d,  $J = 10.7$  Hz, 1H), 3.35 - 3.26 (m, 1H), 1.53 - 1.37 (m, 6H), 1.30 - 1.19 (m, 6H), 0.94 - 0.77 (m, 15H);  $^{13}\text{C}$  NMR (75 MHz,  $\text{CDCl}_3$ )  $\delta$  142.9, 138.8, 138.6, 138.5, 128.6 (2), 128.5, 128.0, 127.9 (2), 127.8, 127.7, 127.6 (2), 127.2, 125.4, 125.4 - 125.2 (m), 89.6, 83.4, 81.9, 79.4, 75.5, 75.2, 74.7, 73.6, 73.4, 72.3, 69.6, 29.2, 27.5, 13.8, 9.2;  $^{19}\text{F}$  NMR (282 MHz,  $\text{CDCl}_3$ )  $\delta$  -62.49; HRMS (ESI)  $m/z$  calcd for  $\text{C}_{47}\text{H}_{61}\text{O}_5\text{F}_3\text{SnNa}$  [ $\text{M} + \text{Na}$ ] $^+$  905.3391, found 905.3380.

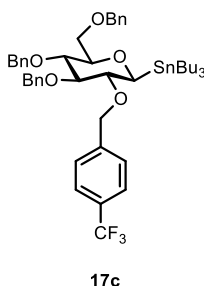

**(2-*O*-Methyl-3,4,6-tri-*O*-benzyl- $\beta$ -D-glucopyranosyl)tri-*n*-butylstannane (17c).** To a solution of (3,4,6-tri-*O*-benzyl- $\beta$ -D-glucopyranosyl)tri-*n*-butylstannane (300 mg, 0.41 mmol) in THF (3.00 mL) was added KHMDS (1.00 mL, 0.500 mmol, 0.5 M in PhMe) under  $\text{N}_2$  at rt. After stirring for 0.5 h,  $\text{CH}_3\text{I}$  (0.82 mmol, 0.052 mL) was added to the reaction mixture and stirred for 8 h. The crude mixture was purified by chromatography on  $\text{SiO}_2$  (Hexanes:EtOAc, 20:1) to afford the product **17c** (303 mg, 99%) as a colorless liquid:  $[\alpha]_D^{23} = -1.0$  ( $c = 2.40$ ,  $\text{CHCl}_3$ ); IR (ATR)  $\nu = 3033, 2959, 2929, 2873, 1733, 1499, 1458, 1365, 1275, 1097, 739, 702, 601$   $\text{cm}^{-1}$ ;  $^1\text{H}$  NMR (300 MHz,  $\text{CDCl}_3$ )  $\delta$  7.40 - 7.24 (m, 15H), 4.97 - 4.77 (m, 3H), 4.68 - 4.50 (m, 3H), 3.72 - 3.65 (m, 2H), 3.62 - 3.36 (m, 7H), 3.28 - 3.23 (m, 1H), 1.60 - 1.47 (m, 6H), 1.42 - 1.21 (m, 6H), 1.07 - 0.82 (m, 15H);  $^{13}\text{C}$  NMR (75 MHz,  $\text{CDCl}_3$ )  $\delta$  138.9 (2), 138.6 (2), 128.5, 128.4, 128.2, 128.1, 128.0, 127.9, 127.8, 127.7, 127.6, 127.5, 89.6, 83.7, 83.4, 79.1, 75.4, 75.2, 74.9, 73.6, 69.6, 60.5, 29.2, 27.6, 13.9, 9.1; HRMS (ESI)  $m/z$  calcd for  $\text{C}_{40}\text{H}_{58}\text{O}_5\text{SnNa}$  [ $\text{M} + \text{Na}$ ] $^+$  761.3204, found 761.3220.

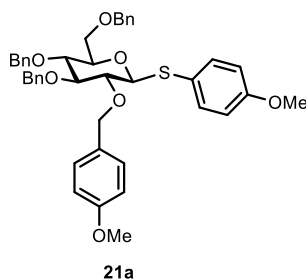

**4-Methoxyphenyl 2-*O*-(4-methoxybenzyl)-3,4,6-tri-*O*-benzyl-1-thio- $\beta$ -D-glucopyranoside (21a).** According to the general protocol A, (2-*O*-(4-methoxybenzyl)-3,4,6-tri-*O*-benzyl- $\beta$ -D-glucopyranosyl)tri-*n*-butylstannane **17a** (127 mg, 0.150 mmol), 1,2-bis(4-methoxyphenyl)disulfane (27.8 mg, 0.100 mmol), and  $\text{CuCl}$  (30.0 mg, 0.300 mmol) were added to anhydrous *m*-xylene and 1,2-dichloroethane (2:1, 3.00 mL). The reaction mixture was heated under  $\text{N}_2$  at 130  $^\circ\text{C}$  for 96 h and afforded after chromatographic purification on  $\text{SiO}_2$  (Hexanes:EtOAc, 8:1) **21a** (55.4 mg, 80%) as a light yellow oil:  $[\alpha]_D^{25} = +0.9$  ( $c = 16.3$ ,  $\text{CHCl}_3$ ); IR (ATR)  $\nu = 3033, 2906, 2866, 1596, 1517, 1495, 1458, 1361, 1290, 1249, 1067, 1033, 914, 828, 739, 702$   $\text{cm}^{-1}$ ;  $^1\text{H}$  NMR (300 MHz,  $\text{CDCl}_3$ )  $\delta$  7.59 - 7.54 (m, 2H), 7.38 - 7.27 (m, 15H), 7.24 - 7.20 (m, 2H), 6.91 - 6.87 (m, 2H), 6.80 - 6.74 (m, 2H), 4.95 - 4.82 (m, 4H), 4.70 (d,  $J = 9.9$  Hz, 1H), 4.65 - 4.53 (m, 4H), 3.83 - 3.60 (m, 10H), 3.50 - 3.40 (m, 2H);  $^{13}\text{C}$  NMR (75 MHz,  $\text{CDCl}_3$ )  $\delta$  159.8, 159.5, 138.6, 138.5, 138.2, 135.2, 130.5, 130.0, 128.6, 128.5, 128.4, 128.1, 128.0, 127.9 (2), 127.8, 127.6, 123.7, 114.5, 114.0, 88.1, 86.9, 80.7, 79.1,

78.0, 75.9, 75.1 (2), 73.5, 69.2, 55.4 (2); HRMS (ESI)  $m/z$  calcd for  $C_{42}H_{44}O_7SNa$   $[M + Na]^+$  715.2705, found 715.2715.

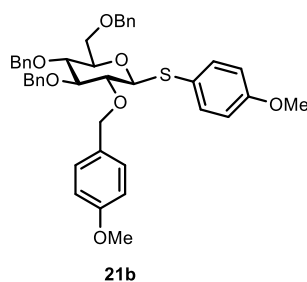

**4-Methoxyphenyl 2-O-(4-(trifluoromethyl)benzyl)-3,4,6-tri-O-benzyl-1-thio-β-D-glucopyranoside (21b).** According to the general protocol A, (2-O-(4-(trifluoromethyl)benzyl)-3,4,6-tri-O-benzyl-β-D-glucopyranosyl)tri-*n*-butylstannane **17b** (132.2 mg, 0.150 mmol), 1,2-bis(4-methoxyphenyl)disulfane (27.8 mg, 0.100 mmol), and CuCl (30.0 mg, 0.300 mmol) were added to anhydrous *m*-xylene and 1,2-dichloroethane (2:1, 3.00 mL). The reaction mixture was heated under  $N_2$  at 130 °C for 96 h and afforded after chromatographic purification on  $SiO_2$  (Hexanes:EtOAc, 9:1) **21b** (53.3 mg, 73%,  $\alpha:\beta > 50:1$ ) as a light yellow oil:  $[\alpha]_D^{24} = -1.3$  ( $c = 13.7$ ,  $CHCl_3$ ); IR (ATR)  $\nu = 3033, 2903, 2866, 1596, 1499, 1458, 1327, 1290, 1249, 1164, 1126, 1067, 823, 739, 702$   $cm^{-1}$ ;  $^1H$  NMR (300 MHz,  $CDCl_3$ )  $\delta$  7.61 - 7.58 (m, 2H), 7.55 - 7.48 (m, 4H), 7.38 - 7.30 (m, 15H), 6.79 - 6.74 (m, 2H), 4.95 - 4.77 (m, 5H), 4.65 - 4.53 (m, 4H), 3.83 - 3.62 (m, 7H), 3.51 - 3.41 (m, 2H);  $^{13}C$  NMR (75 MHz,  $CDCl_3$ )  $\delta$  159.9, 142.4 (2), 138.5, 138.4, 138.1, 135.2, 130.6 - 129.3 (m), 128.6 (2), 128.5, 128.1, 128.0, 127.9, 127.8 (2), 127.7, 125.5 - 125.4 (m), 123.4, 114.6, 87.9, 86.9, 81.0, 79.2, 78.0, 75.9, 75.2, 74.5, 73.6, 69.2, 55.4;  $^{19}F$  NMR (282 MHz  $CDCl_3$ )  $\delta$  -62.47; HRMS (ESI)  $m/z$  calcd for  $C_{42}H_{41}O_6F_3SNa$   $[M + Na]^+$  753.2474, found 753.2472.

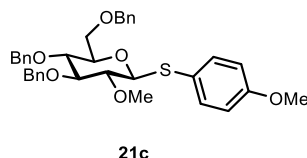

**4-Methoxyphenyl 2-O-methyl-3,4,6-tri-O-benzyl-1-thio-β-D-glucopyranoside (21c).** According to the general protocol A, (2-O-methyl-3,4,6-tri-O-benzyl-β-D-glucopyranosyl)tri-*n*-butylstannane **S3** (110.7 mg, 0.150 mmol), 1-((4-methoxyphenyl)thio)pyrrolidine-2,5-dione (23.7 mg, 0.100 mmol), and CuCl (30.0 mg, 0.300 mmol) were added to anhydrous *m*-xylene and 1,2-dichloroethane (2:1, 3.00 mL). The reaction mixture was heated under  $N_2$  at 130 °C for 96 h and afforded after chromatographic purification on  $SiO_2$  (Hexanes:EtOAc, 8:1) **17c** (39.9 mg, 68%,  $\alpha:\beta = 1:17$ ) as a light yellow oil:  $[\alpha]_D^{24} = -1.7$  ( $c = 16.3$ ,  $CHCl_3$ ); IR (ATR)  $\nu = 3033, 1903, 2866, 1596, 1495, 1458, 1365, 1286, 1249, 1074, 1033, 914, 832, 739, 702, 646, 527$   $cm^{-1}$ ;  $^1H$  NMR (300 MHz,  $CDCl_3$ )  $\delta$  7.58 - 7.52 (m, 2H), 7.37 - 7.27 (m, 13H), 7.23 - 7.20 (m, 2H), 6.80 - 6.73 (m, 2H), 4.92 - 4.81 (m, 3H), 4.62 - 4.51 (m, 3H), 4.43 (d,  $J = 9.8$  Hz, 1H), 3.80 - 3.69 (m, 5H), 3.65 (s, 3H), 3.62 - 3.54 (m, 2H), 3.44 (ddt,  $J = 8.5, 3.9, 1.9$  Hz, 1H), 3.18 - 3.12 (m, 1H);  $^{13}C$  NMR (75 MHz,  $CDCl_3$ )  $\delta$  159.9, 138.6, 138.5, 138.3, 135.3, 128.6, 128.5 (2), 128.1, 128.0, 127.9 (2), 127.8, 127.6, 123.5, 114.5, 87.8, 86.9, 82.7, 79.1, 77.8, 75.8, 75.1, 73.5, 69.3, 61.1, 55.4; HRMS (ESI)  $m/z$  calcd for  $C_{35}H_{38}O_6SNa$   $[M + Na]^+$  609.2287, found 609.2295.

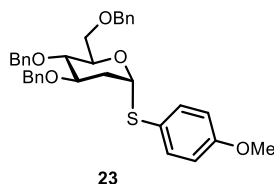

**4-Methoxyphenyl 3,4,6-tri-*O*-benzyl-2-deoxy-1-thio- $\alpha$ -D-glucopyranoside (23).** According to the general protocol B, (3,4,6-tri-*O*-benzyl-2-deoxy- $\beta$ -D-glucopyranosyl)tri-*n*-butylstannane<sup>1</sup> **17d** (106 mg, 0.150 mmol), 1,2-bis(4-methoxyphenyl)disulfane (23.7 mg, 0.100 mmol), KF (17.4 mg, 0.300 mmol), 4,4'-di-*tert*-butyl-2,2'-dipyridyl (6.70 mg, 0.025 mmol), and CuCl (2.00 mg, 0.020 mmol) were added to anhydrous 1,4-dioxane (2.00 mL). The reaction mixture was stirred at 120 °C under 5W blue LED irradiation for 96 h and afforded after chromatographic purification on SiO<sub>2</sub> (Hexanes:EtOAc, 8:1) **23** (41.2 mg, 74%) as a colorless oil. Characterization data matched the literature report.<sup>1</sup>

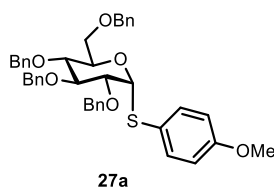

**4-Methoxyphenyl 3,4,6-tri-*O*-benzyl-2-deoxy-1-thio- $\alpha$ -D-glucopyranoside (27).** According to the general protocol B, (2,3,4,6-tetra-*O*-benzyl-2- $\beta$ -D-glucopyranosyl)tri-*n*-butylstannane<sup>1</sup> (122.1 mg, 0.150 mmol), 1,2-bis(4-methoxyphenyl)disulfane (23.7 mg, 0.100 mmol), KF (17.4 mg, 0.300 mmol), 4,4'-di-*tert*-butyl-2,2'-dipyridyl (6.70 mg, 0.025 mmol), and CuCl (2.00 mg, 0.020 mmol) were added to anhydrous 1,4-dioxane (2.00 mL). The reaction mixture was stirred at 120 °C under 5W blue LED irradiation for 96 h and afforded after chromatographic purification on SiO<sub>2</sub> (Hexanes:EtOAc, 9:1) **23** (31.8 mg, 48%,  $\alpha$ : $\beta$  = 2.7:1) as a colorless oil. Characterization data matched the literature report.<sup>2</sup>

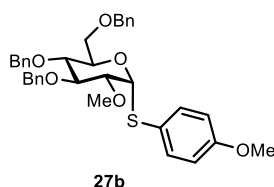

**4-Methoxyphenyl 2-*O*-methyl-3,4,6-tri-*O*-benzyl-1-thio- $\alpha$ -D-glucopyranoside (27b).** According to the general protocol B, (2-*O*-methyl-3,4,6-tri-*O*-benzyl- $\beta$ -D-glucopyranosyl)tri-*n*-butylstannane **S3** (110.6 mg, 0.150 mmol), 1,2-bis(4-methoxyphenyl)disulfane (23.7 mg, 0.100 mmol), KF (17.4 mg, 0.300 mmol), 2,2':6',2''-terpyridine (5.80 mg, 0.025 mmol), and CuCl (2.00 mg, 0.020 mmol) were added to anhydrous *m*-xylene and 1,4-dioxane (1:1, 2.00 mL). The reaction mixture was stirred at 130 °C for 96 h and afforded after chromatographic purification on SiO<sub>2</sub> (Hexanes:EtOAc, 5:1) **27b** (51.6 mg, 88%,  $\alpha$ : $\beta$  = 3.9:1) as a light yellow oil:  $[\alpha]_D^{23} = +17.8$  ( $c = 1.35$ , CHCl<sub>3</sub>); IR (ATR)  $\nu = 3033, 2925, 2858, 1596, 1499, 1458, 1361, 1290, 1249, 1093, 1033, 832, 743, 702, 650$  cm<sup>-1</sup>; <sup>1</sup>H NMR (300 MHz, CDCl<sub>3</sub>)  $\delta$  7.48 - 7.42 (m, 2H), 7.40 - 7.27 (m, 13H), 7.17 (dd,  $J = 7.2, 2.4$  Hz, 2H), 6.87 - 6.72 (m, 2H), 5.60 (d,  $J = 5.3$  Hz, 1H), 4.97 (d,  $J = 10.9$  Hz, 1H), 4.82 (dd,  $J = 22.6, 10.9$  Hz, 2H), 4.63 - 4.49 (m, 2H), 4.48 - 4.37 (m, 2H), 3.87 - 3.78 (m, 2H), 3.76 (s, 3H), 3.70 - 3.60 (m, 3H), 3.55 (s, 3H); <sup>13</sup>C NMR (75 MHz, CDCl<sub>3</sub>)  $\delta$  159.7, 139.0, 138.4, 138.2, 134.9, 128.5, 128.5, 128.1, 128.0, 128.0, 127.8, 127.8, 124.5, 114.7, 87.7, 82.7, 82.5, 77.7, 75.8, 75.3, 73.6, 71.2, 69.0, 58.3, 55.5; HRMS (ESI)  $m/z$  calcd for C<sub>35</sub>H<sub>38</sub>O<sub>6</sub>SNa [M + Na]<sup>+</sup> 609.2287, found 609.2288.

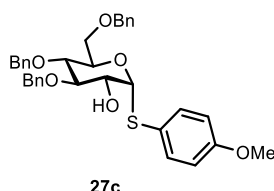

**4-Methoxyphenyl 3,4,6-tri-*O*-benzyl-1-thio- $\alpha$ -D-glucopyranoside (27c).** According to the general protocol B, (3,4,6-tri-*O*-benzyl- $\beta$ -D-glucopyranosyl)tri-*n*-butylstannane<sup>1</sup> (109 mg, 0.150 mmol), 1,2-bis(4-methoxyphenyl)disulfane (27.8 mg, 0.100 mmol), KF (17.4 mg, 0.300 mmol), 4,4'-di-*tert*-butyl-2,2'-dipyridyl (12.1 mg, 0.045 mmol), and CuCl (4.00 mg, 0.040 mmol) were added to anhydrous 1,4-dioxane (2.00 mL). The reaction mixture was stirred at 120 °C under 5W blue LED irradiation for 96 h and afforded after chromatographic purification on SiO<sub>2</sub> (Hexanes:EtOAc, 3:1) **27c** (25.8 mg, 45%,  $\alpha$ : $\beta$  = 3.9:1) as a light yellow oil:  $[\alpha]_D^{22} = +26.9$  ( $c = 1.05$ , CHCl<sub>3</sub>); IR (ATR)  $\nu = 3402, 3033, 2910, 2869, 1596, 1499, 1458, 1365, 1290, 1249, 1178, 1074, 1033, 832, 743, 702, 646$  cm<sup>-1</sup>; <sup>1</sup>H NMR (300 MHz, CDCl<sub>3</sub>)  $\delta$  7.47 - 7.42 (m, 2H), 7.39 - 7.27 (m, 13H), 7.21 - 7.18 (m, 2H), 6.81 - 6.76 (m, 2H), 5.46 (d,  $J = 5.3$  Hz, 1H), 4.89 (s, 2H), 4.83 (d,  $J = 10.9$  Hz, 1H), 4.62 (d,  $J = 11.9$  Hz, 1H), 4.55 (d,  $J = 10.8$  Hz, 1H), 4.48 (d,  $J = 12.0$  Hz, 1H), 4.40 - 4.38 (m, 1H), 3.95 (q,  $J = 6.5$  Hz, 1H), 3.82 (dd,  $J = 10.8, 4.3$  Hz, 4H), 3.77 (s, 3H), 3.73 - 3.63 (m, 3H), 2.33 (d,  $J = 6.4$  Hz, 1H); <sup>13</sup>C NMR (75 MHz, CDCl<sub>3</sub>)  $\delta$  159.9, 138.5, 138.2, 138.1, 135.0, 128.7, 128.6, 128.5, 128.1, 128.0 (3), 127.8, 124.1, 114.8, 91.1, 83.6, 77.9, 75.6, 75.1, 73.6, 72.6, 72.0, 68.8, 55.5; HRMS (ESI)  $m/z$  calcd for C<sub>34</sub>H<sub>36</sub>O<sub>6</sub>SNa [M + Na]<sup>+</sup> 595.2130, found 595.2135.

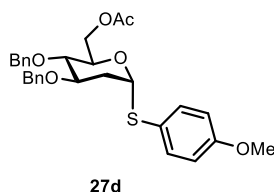

**4-Methoxyphenyl 3,4-di-*O*-benzyl-6-*O*-acetyl-2-deoxy-1-thio- $\alpha$ -D-glucopyranoside (27d).** According to the general protocol B, (3,4-di-*O*-benzyl-6-*O*-acetyl-2-deoxy- $\beta$ -D-galactopyranosyl)tri-*n*-butylstannane **S1** (98.9 mg, 0.150 mmol), 1,2-bis(4-methoxyphenyl)disulfane (27.8 mg, 0.100 mmol), KF (17.4 mg, 0.300 mmol), 4,4'-di-*tert*-butyl-2,2'-dipyridyl (12.1 mg, 0.045 mmol), and CuCl (4.00 mg, 0.040 mmol) were added to anhydrous 1,4-dioxane (2.00 mL). The reaction mixture was stirred at 120 °C under 5W blue LED irradiation for 96 h and afforded after chromatographic purification on SiO<sub>2</sub> (Hexanes:EtOAc, 4:1) **27d** (24.4 mg, 48%) as a colorless oil:  $[\alpha]_D^{24} = +24.9$  ( $c = 1.60$ , CHCl<sub>3</sub>); IR (ATR)  $\nu = 3033, 2955, 1745, 1596, 1499, 1458, 1368, 1290, 1249, 1182, 1097, 1033, 832, 743, 702, 650$  cm<sup>-1</sup>; <sup>1</sup>H NMR (300 MHz, CDCl<sub>3</sub>)  $\delta$  7.40 - 7.29 (m, 12H), 6.85 - 6.80 (m, 2H), 5.47 (d,  $J = 5.5$  Hz, 1H), 4.94 (d,  $J = 10.9$  Hz, 1H), 4.72 - 4.60 (m, 3H), 4.44 - 4.22 (m, 3H), 4.01 (ddd,  $J = 11.5, 8.6, 4.8$  Hz, 1H), 3.79 (s, 3H), 3.46 (dd,  $J = 9.6, 8.6$  Hz, 1H), 2.46 (ddd,  $J = 13.5, 4.9, 1.4$  Hz, 1H), 2.11 - 2.03 (m, 1H), 2.01 (s, 3H); <sup>13</sup>C NMR (75 MHz, CDCl<sub>3</sub>)  $\delta$  170.9, 159.8, 138.3, 138.2, 134.8, 128.6 (2), 128.3, 128.0, 127.9, 124.7, 114.7, 84.9, 78.2, 78.0, 75.1, 72.0, 70.0, 63.7, 55.5, 35.9, 21.0; HRMS (ESI)  $m/z$  calcd for C<sub>29</sub>H<sub>32</sub>O<sub>6</sub>SNa [M + Na]<sup>+</sup> 531.1817, found 531.1823.

According to the general protocol C, (3,4-di-*O*-benzyl-6-*O*-acetyl-2-deoxy- $\beta$ -D-glucopyranosyl)tri-*n*-butylstannane **S1** (98.9 mg, 0.150 mmol), 1,2-bis(4-methoxyphenyl)disulfane (27.8 mg, 0.100 mmol), KF (17.4 mg, 0.300 mmol), and 4,4'-di-*tert*-butyl-2,2'-dipyridyl (12.1 mg, 0.045 mmol) were added to anhydrous 1,4-dioxane (2.00 mL). The reaction mixture was stirred at 120 °C under 5W blue LED irradiation for 48 h

and afforded after chromatographic purification on SiO<sub>2</sub> (Hexanes:EtOAc, 4:1) **27d** (36.6 mg, 72%) as a colorless oil.

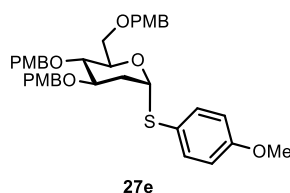

**4-Methoxyphenyl 3,4,6-tri-O-(4-methoxybenzyl)-2-deoxy-1-thio- $\alpha$ -D-glucopyranoside (27e).** According to the general protocol B, (3,4,6-tri-O-(4-methoxybenzyl)-2-deoxy- $\beta$ -D-glucopyranosyl)tri-*n*-butylstannane **S2** (123.1 mg, 0.150 mmol), 1,2-bis(4-methoxyphenyl)disulfane (27.8 mg, 0.100 mmol), KF (17.4 mg, 0.300 mmol), 4,4'-di-*tert*-butyl-2,2'-dipyridyl (6.70 mg, 0.025 mmol), and CuCl (2.00 mg, 0.020 mmol) were added to anhydrous 1,4-dioxane (2.00 mL). The reaction mixture was stirred at 120 °C under 5W blue LED irradiation for 96 h and afforded after chromatographic purification on SiO<sub>2</sub> (Hexanes:EtOAc, 4:1) **27e** (38.8 mg, 60%) as a light yellow oil:  $[\alpha]_D^{24} = +17.7$  ( $c = 7.65$ , CHCl<sub>3</sub>); IR (ATR)  $\nu = 3033, 2906, 2839, 1614, 1514, 1465, 1365, 1305, 1246, 1178, 1089, 1033, 825, 761, 646, 523$  cm<sup>-1</sup>; <sup>1</sup>H NMR (300 MHz, CDCl<sub>3</sub>)  $\delta$  7.40 - 7.21 (m, 6H), 7.13 - 7.09 (m, 2H), 6.91 - 6.73 (m, 8H), 5.49 (d,  $J = 5.3$  Hz, 1H), 4.81 (d,  $J = 10.4$  Hz, 1H), 4.64 - 4.54 (m, 3H), 4.45 - 4.37 (m, 2H), 4.32 (ddd,  $J = 9.8, 4.4, 1.9$  Hz, 1H), 3.94 (ddd,  $J = 11.3, 8.6, 4.7$  Hz, 1H), 3.81 (s, 3H), 3.80 (s, 3H), 3.78 (s, 3H), 3.76 (s, 3H), 3.75 - 3.69 (m, 1H), 3.63 (dd,  $J = 10.5, 2.1$  Hz, 1H), 3.54 (dd,  $J = 9.8, 8.7$  Hz, 1H), 2.40 (ddd,  $J = 13.5, 4.9, 1.4$  Hz, 1H), 2.05 (ddd,  $J = 13.4, 11.6, 5.7$  Hz, 1H); <sup>13</sup>C NMR (75 MHz, CDCl<sub>3</sub>)  $\delta$  159.6, 159.4, 159.3 (2), 134.6, 130.8, 130.7, 130.4, 129.7 (2), 129.5, 125.2, 114.6, 114.0, 113.9, 113.8, 85.1, 78.4, 77.7, 74.7, 73.1, 71.7, 71.7, 68.7, 55.4, 55.3, 36.2; HRMS (ESI)  $m/z$  calcd for C<sub>37</sub>H<sub>42</sub>O<sub>8</sub>SNa [M + Na]<sup>+</sup> 669.2498, found 669.2503.

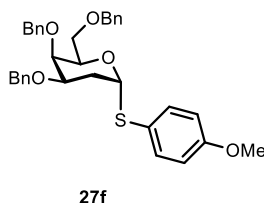

**4-Methoxyphenyl 3,4,6-tri-O-benzyl-2-deoxy-1-thio- $\alpha$ -D-galactopyranoside (27f).** According to the general protocol B, (3,4,6-tri-O-benzyl-2-deoxy- $\beta$ -D-galactopyranosyl)tri-*n*-butylstannane **S3** (106 mg, 0.150 mmol), 1,2-bis(4-methoxyphenyl)disulfane (27.8 mg, 0.100 mmol), KF (17.4 mg, 0.300 mmol), 4,4'-di-*tert*-butyl-2,2'-dipyridyl (12.1 mg, 0.045 mmol), and CuCl (4.00 mg, 0.040 mmol) were added to anhydrous 1,4-dioxane (2.00 mL). The reaction mixture was stirred at 120 °C under 5W blue LED irradiation for 96 h and afforded after chromatographic purification on SiO<sub>2</sub> (Hexanes:EtOAc, 9:1) **27f** (29.5 mg, 53%) as a light yellow oil:  $[\alpha]_D^{24} = +17.4$  ( $c = 4.15$ , CHCl<sub>3</sub>); IR (ATR)  $\nu = 3033, 2869, 1596, 1495, 1458, 1368, 1286, 1249, 1178, 1093, 1063, 1033, 832, 739, 702, 650$  cm<sup>-1</sup>; <sup>1</sup>H NMR (300 MHz, CDCl<sub>3</sub>)  $\delta$  7.41 - 7.27 (m, 17H), 6.74 - 6.69 (m, 2H), 5.55 (d,  $J = 5.5$  Hz, 1H), 4.94 (d,  $J = 11.6$  Hz, 1H), 4.67 - 4.61 (m, 3H), 4.50 - 4.40 (m, 3H), 3.95 - 3.89 (m, 2H), 3.74 (s, 3H), 3.62 (dd,  $J = 6.3, 0.9$  Hz, 2H), 2.58 (ddd,  $J = 12.8, 11.7, 5.7$  Hz, 1H), 2.19 - 2.13 (m, 1H); <sup>13</sup>C NMR (75 MHz, CDCl<sub>3</sub>)  $\delta$  159.6, 139.0, 138.4, 138.4, 134.7, 128.6, 128.5, 128.4, 128.2, 127.8 (2), 127.7 (2), 127.5, 125.1, 114.6, 85.5, 75.5, 74.5, 73.6, 73.6, 70.9, 70.7, 69.9, 55.4, 31.8. Characterization data matched the literature report.<sup>2</sup>

According to the general protocol C, (3,4,6-tri-O-benzyl-2-deoxy- $\beta$ -D-galactopyranosyl)tri-*n*-butylstannane **S3** (106 mg, 0.150 mmol), 1,2-bis(4-methoxyphenyl)disulfane (27.8 mg, 0.100 mmol), KF (17.4 mg, 0.300

mmol), and 4,4'-di-*tert*-butyl-2,2'-dipyridyl (12.1 mg, 0.045 mmol) were added to anhydrous 1,4-dioxane (2.00 mL). The reaction mixture was stirred at 120 °C under 5W blue LED irradiation for 48 h and afforded after chromatographic purification on SiO<sub>2</sub> (Hexanes:EtOAc, 9:1) **27f** (33.6 mg, 64%) as a light yellow oil.

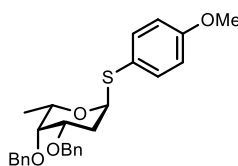

**27g**

**4-Methoxyphenyl 3,4-di-*O*-benzyl-2-deoxy-1-thio- $\alpha$ -L-fucopyranoside (27g).** According to the general protocol B, (3,4-di-*O*-benzyl-2-deoxy- $\beta$ -L-fucopyranosyl)tri-*n*-butylstannane **S4** (90.2 mg, 0.150 mmol), 1,2-bis(4-methoxyphenyl)disulfane (27.8 mg, 0.100 mmol), KF (17.4 mg, 0.300 mmol), 4,4'-di-*tert*-butyl-2,2'-dipyridyl (6.70 mg, 0.025 mmol), and CuCl (2.00 mg, 0.020 mmol) were added to anhydrous 1,4-dioxane (2.00 mL). The reaction mixture was stirred at 120 °C under 5W blue LED irradiation for 96 h and afforded after chromatographic purification on SiO<sub>2</sub> (Hexanes:EtOAc, 8:1) **27g** (23.9 mg, 53% ) as a light yellow oil:  $[\alpha]_D^{23} = -12.9$  ( $c = 7.60$ , CHCl<sub>3</sub>); IR (ATR)  $\nu = 3033, 2936, 2869, 1596, 1495, 1458, 1365, 1286, 1249, 1175, 1104, 1059, 1030, 962, 832, 739, 702, 650$  cm<sup>-1</sup>; <sup>1</sup>H NMR (300 MHz, CDCl<sub>3</sub>)  $\delta$  7.41- 7.27 (m, 12H), 6.88 - 6.81 (m, 2H), 5.57 (d,  $J = 5.4$  Hz, 1H), 4.99 (d,  $J = 11.7$  Hz, 1H), 4.72 - 4.58 (m, 3H), 4.34 - 4.28 (m, 1H), 3.93 (ddd,  $J = 12.2, 4.4, 2.4$  Hz, 1H), 3.79 (s, 3H), 3.67 - 3.66 (m, 1H), 2.56 (td,  $J = 12.6, 5.7$  Hz, 1H), 2.18 - 2.12 (m, 1H), 1.20 (d,  $J = 6.5$  Hz, 3H); <sup>13</sup>C NMR (75 MHz, CDCl<sub>3</sub>)  $\delta$  159.4, 139.0, 138.5, 134.8, 134.1, 128.6, 128.4, 128.3, 128.2, 127.8, 127.6, 127.5, 127.4, 125.6, 114.6, 85.5, 76.2, 76.0, 74.6, 70.6, 67.8, 55.4, 31.4, 17.3; HRMS (ESI)  $m/z$  calcd for C<sub>27</sub>H<sub>30</sub>O<sub>4</sub>SNa [M + Na]<sup>+</sup> 473.1762, found 473.1753.

According to the general protocol C, (3,4-di-*O*-benzyl-2-deoxy- $\beta$ -L-fucopyranosyl)tri-*n*-butylstannane **S4** (90.2 mg, 0.150 mmol), 1,2-bis(4-methoxyphenyl)disulfane (27.8 mg, 0.100 mmol), KF (17.4 mg, 0.300 mmol), and 4,4'-di-*tert*-butyl-2,2'-dipyridyl (12.1 mg, 0.045 mmol) were added to anhydrous 1,4-dioxane (2.00 mL). The reaction mixture was stirred at 120 °C under 5W blue LED irradiation for 48 h and afforded after chromatographic purification on SiO<sub>2</sub> (Hexanes:EtOAc, 8:1) **27g** (35.2 mg, 78%) as a light yellow oil.

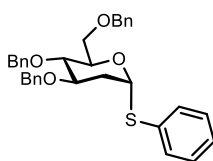

**27h**

**Phenyl 3,4,6-tri-*O*-benzyl-2-deoxy-1-thio- $\alpha$ -D-glucopyranoside (27h).** According to the general protocol B, (3,4,6-tri-*O*-benzyl-2-deoxy- $\beta$ -D-glucopyranosyl)tri-*n*-butylstannane (106 mg, 0.150 mmol), 1,2-diphenyldisulfane (21.8 mg, 0.100 mmol), KF (17.4 mg, 0.300 mmol), 4,4'-di-*tert*-butyl-2,2'-dipyridyl (12.1 mg, 0.045 mmol), and CuCl (4.00 mg, 0.040 mmol) were added to anhydrous 1,4-dioxane (2.00 mL). The reaction mixture was stirred at 120 °C under 5W blue LED irradiation for 96 h and afforded after chromatographic purification on SiO<sub>2</sub> (Hexanes:EtOAc, 10:1) **27h** (24.2 mg, 46%,  $\alpha/\beta > 15:1$ ) as a colorless oil:  $[\alpha]_D^{23} = +11.8$  ( $c = 2.60$ , CHCl<sub>3</sub>); IR (ATR)  $\nu = 3033, 2921, 2866, 1588, 1458, 1365, 1100, 1030, 739, 698, 642$  cm<sup>-1</sup>; <sup>1</sup>H NMR (300 MHz, CDCl<sub>3</sub>)  $\delta$  7.50 - 7.43 (m, 2H), 7.36 - 7.27 (m, 13H), 7.25 - 7.19 (m, 5H), 5.69 (d,  $J = 5.8$  Hz, 1H), 4.91 (d,  $J = 10.9$  Hz, 1H), 4.72 - 4.58 (m, 3H), 4.55 (d,  $J = 10.8$  Hz, 1H), 4.46 (d,  $J = 12.1$  Hz, 1H), 4.31 (ddd,  $J = 9.9, 4.2, 2.1$  Hz, 1H), 4.02 - 3.94 (m, 1H), 3.83 (dd,  $J = 10.7, 4.1$  Hz, 1H), 3.74 - 3.62 (m, 2H), 2.46 (ddd,  $J = 13.4, 4.9, 1.4$  Hz, 1H), 2.13 (ddd,  $J = 13.5, 11.6, 5.7$  Hz, 1H); <sup>13</sup>C NMR (75

MHz, CDCl<sub>3</sub>)  $\delta$  138.6, 138.5, 138.3, 135.2, 131.3, 129.0, 128.6, 128.5 (2), 128.1, 128.0, 127.9 (2), 127.8, 127.7, 127.2, 84.2, 78.6, 78.1, 75.1, 73.5, 72.1, 71.9, 69.0, 36.4; HRMS (ESI)  $m/z$  calcd for C<sub>33</sub>H<sub>34</sub>O<sub>4</sub>SNa [M + Na]<sup>+</sup> 549.2075, found 549.2078.

According to the general protocol C, (3,4,6-tri-*O*-benzyl-2-deoxy- $\beta$ -D-glucopyranosyl)tri-*n*-butylstannane<sup>1</sup> (106 mg, 0.150 mmol), 1,2-diphenyldisulfane (21.8 mg, 0.100 mmol), KF (17.4 mg, 0.300 mmol), and 4,4'-di-*tert*-butyl-2,2'-dipyridyl (12.1 mg, 0.045 mmol) were added to anhydrous 1,4-dioxane (2.00 mL). The reaction mixture was stirred at 120 °C under 5W blue LED irradiation for 48 h and afforded after chromatographic purification on SiO<sub>2</sub> (Hexanes:EtOAc, 10:1) **27h** (33.7 mg, 64%) as a colorless oil.

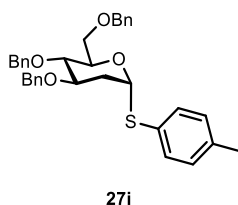

**4-Methylphenyl 3,4,6-tri-*O*-benzyl-2-deoxy-1-thio- $\alpha$ -D-glucopyranoside (27i).** According to the general protocol B, (3,4,6-tri-*O*-benzyl-2-deoxy- $\beta$ -D-glucopyranosyl)tri-*n*-butylstannane<sup>1</sup> (106 mg, 0.150 mmol), 1,2-bis(4-methylphenyl)disulfane (24.6 mg, 0.100 mmol), KF (17.4 mg, 0.300 mmol), 4,4'-di-*tert*-butyl-2,2'-dipyridyl (12.1 mg, 0.045 mmol), and CuCl (4.00 mg, 0.040 mmol) were added to anhydrous 1,4-dioxane (2.00 mL). The reaction mixture was stirred at 120 °C under 5W blue LED irradiation for 96 h and afforded after chromatographic purification on SiO<sub>2</sub> (Hexanes:EtOAc, 9:1) **27i** (32.5 mg, 60%) as a colorless oil:  $[\alpha]_D^{23} = +17.3$  ( $c = 5.80$ , CHCl<sub>3</sub>); IR (ATR)  $\nu = 3033, 2921, 2866, 1499, 1458, 1365, 1193, 1089, 1030, 814, 739, 702, 650$  cm<sup>-1</sup>; <sup>1</sup>H NMR (300 MHz, CDCl<sub>3</sub>)  $\delta$  7.41 - 7.28 (m, 15H), 7.23 - 7.20 (m, 2H), 7.05 (d,  $J = 8.0$  Hz, 2H), 5.62 (d,  $J = 5.7$ , 1H), 4.91 (d,  $J = 10.9$  Hz, 1H), 4.72 - 4.53 (m, 4H), 4.46 (d,  $J = 12.0$  Hz, 1H), 4.33 (ddd,  $J = 9.8, 4.2, 2.0$  Hz, 1H), 3.98 (ddd,  $J = 11.6, 5.8, 3.3$  Hz, 1H), 3.83 (dd,  $J = 10.6, 4.2$  Hz, 1H), 3.73 - 3.61 (m, 2H), 2.46 (ddd,  $J = 13.4, 4.9, 1.4$  Hz, 1H), 2.31 (s, 3H), 2.11 (ddd,  $J = 13.4, 11.6, 5.7$  Hz, 1H); <sup>13</sup>C NMR (75 MHz, CDCl<sub>3</sub>)  $\delta$  138.6 (2), 138.3, 137.4, 132.0, 131.3, 129.8, 128.6, 128.5, 128.4, 128.0 (2), 127.9, 127.8 (2), 127.7, 84.5, 78.6, 78.1, 75.1, 73.5, 72.0, 71.8, 69.1, 36.3, 21.2; HRMS (ESI)  $m/z$  calcd for C<sub>34</sub>H<sub>36</sub>O<sub>4</sub>SNa [M + Na]<sup>+</sup> 563.2232, found 563.2241.

According to the general protocol C, (3,4,6-tri-*O*-benzyl-2-deoxy- $\beta$ -D-glucopyranosyl)tri-*n*-butylstannane<sup>1</sup> (106 mg, 0.150 mmol), bis(4-methylphenyl)disulfane (24.6 mg, 0.100 mmol), KF (17.4 mg, 0.300 mmol), and 4,4'-di-*tert*-butyl-2,2'-dipyridyl (12.1 mg, 0.045 mmol) were added to anhydrous 1,4-dioxane (2.00 mL). The reaction mixture was stirred at 120 °C under 5W blue LED irradiation for 48 h and afforded after chromatographic purification on SiO<sub>2</sub> (Hexanes:EtOAc, 9:1) **27i** (28.7 mg, 53%) as a colorless oil.

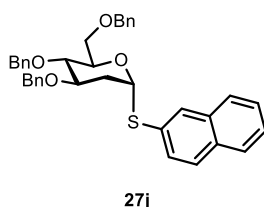

**2-Naphthyl 3,4,6-tri-*O*-benzyl-2-deoxy-1-thio- $\alpha$ -D-glucopyranoside (27j).** According to the general protocol B, (3,4,6-tri-*O*-benzyl-2-deoxy- $\beta$ -D-glucopyranosyl)tri-*n*-butylstannane<sup>1</sup> (106 mg, 0.150 mmol), 1,2-di(naphthalen-2-yl)disulfane (31.8 mg, 0.100 mmol), KF (17.4 mg, 0.300 mmol), 4,4'-di-*tert*-butyl-2,2'-dipyridyl (12.1 mg, 0.045 mmol), and CuCl (4.00 mg, 0.040 mmol) were added to anhydrous 1,4-dioxane

(2.00 mL). The reaction mixture was stirred at 120 °C under 5W blue LED irradiation for 96 h and afforded after chromatographic purification on SiO<sub>2</sub> (Hexanes:EtOAc, 9:1) **27j** (26.0 mg, 45%,  $\alpha:\beta > 20:1$ ) as a colorless oil:  $[\alpha]_D^{25} = +18.6$  (c = 2.50, CHCl<sub>3</sub>); IR (ATR)  $\nu = 3033, 2921, 2866, 1587, 1499, 1458, 1365, 1193, 1097, 1030, 948, 858, 817, 739, 702, 638 \text{ cm}^{-1}$ ; <sup>1</sup>H NMR (300 MHz, CDCl<sub>3</sub>)  $\delta$  7.96 (s, 1H), 7.79 - 7.68 (m, 3H), 7.53 - 7.41 (m, 3H), 7.39 - 7.27 (m, 12H), 7.23 - 7.20 (m, 2H), 5.82 (d,  $J = 5.4 \text{ Hz}$ , 1H), 4.92 (d,  $J = 10.9 \text{ Hz}$ , 1H), 4.74 - 4.54 (m, 4H), 4.45 (d,  $J = 12.0 \text{ Hz}$ , 1H), 4.36 (ddd,  $J = 9.7, 4.0, 1.9 \text{ Hz}$ , 1H), 4.03 (ddd,  $J = 11.5, 8.7, 4.9 \text{ Hz}$ , 1H), 3.83 (dd,  $J = 10.7, 4.1 \text{ Hz}$ , 1H), 3.68 (ddd,  $J = 8.8, 5.0, 3.0 \text{ Hz}$ , 2H), 2.5 - 2.45 (m, 1H), 2.17 (ddd,  $J = 13.4, 11.5, 5.6 \text{ Hz}$ , 1H); <sup>13</sup>C NMR (75 MHz, CDCl<sub>3</sub>)  $\delta$  138.6, 138.5, 138.2, 133.9, 132.5, 132.4, 129.7, 128.7, 128.6, 128.5 (2), 128.1, 128.0, 127.9 (3), 127.8, 127.7, 127.6, 126.6, 126.1, 84.1, 78.6, 78.1, 75.2, 73.6, 72.1, 72.0, 69.1, 36.4; HRMS (ESI)  $m/z$  calcd for C<sub>37</sub>H<sub>36</sub>O<sub>4</sub>SNa [M + Na]<sup>+</sup> 599.2232, found 599.2239.

According to the general protocol C, (3,4,6-tri-*O*-benzyl-2-deoxy- $\beta$ -D-glucopyranosyl)tri-*n*-butylstannane<sup>1</sup> (106 mg, 0.150 mmol), 1,2-di(naphthalen-2-yl)disulfane (31.8 mg, 0.100 mmol), KF (17.4 mg, 0.300 mmol), and 4,4'-di-*tert*-butyl-2,2'-dipyridyl (12.1 mg, 0.045 mmol) were added to anhydrous 1,4-dioxane (2.00 mL). The reaction mixture was stirred at 120 °C under 5W blue LED irradiation for 48 h and afforded after chromatographic purification on SiO<sub>2</sub> (Hexanes:EtOAc, 9:1) **27j** (31.8 mg, 55%) as a colorless oil.

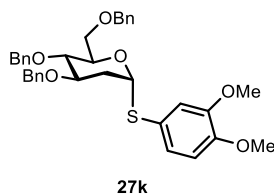

**3,4-Dimethoxyphenyl 3,4,6-tri-*O*-benzyl-2-deoxy-1-thio- $\alpha$ -D-glucopyranoside (27k).** According to the general protocol B, (3,4,6-tri-*O*-benzyl-2-deoxy- $\beta$ -D-glucopyranosyl)tri-*n*-butylstannane<sup>1</sup> (106 mg, 0.150 mmol), 1,2-bis(3,4-dimethoxyphenyl)disulfane (33.8 mg, 0.100 mmol), KF (17.4 mg, 0.300 mmol), 4,4'-di-*tert*-butyl-2,2'-dipyridyl (12.1 mg, 0.045 mmol), and CuCl (4.00 mg, 0.040 mmol) were added to anhydrous 1,4-dioxane (2.00 mL). The reaction mixture was stirred at 120 °C under 5W blue LED irradiation for 96 h and afforded after chromatographic purification on SiO<sub>2</sub> (Hexanes:EtOAc, 5:1) **27k** (31.1 mg, 53%) as a colorless oil:  $[\alpha]_D^{23} = +13.2$  (c = 1.45, CHCl<sub>3</sub>); IR (ATR)  $\nu = 3033, 2906, 2866, 1588, 1506, 1458, 1398, 1365, 1320, 1257, 1234, 1182, 1093, 1030, 951, 914, 884, 854, 739, 702, 653, 609 \text{ cm}^{-1}$ ; <sup>1</sup>H NMR (300 MHz, CDCl<sub>3</sub>)  $\delta$  7.37 - 7.27 (m, 13H), 7.24 - 7.20 (m, 2H), 7.06 - 6.98 (m, 2H), 6.70 (d,  $J = 8.3 \text{ Hz}$ , 1H), 5.56 (d,  $J = 5.4 \text{ Hz}$ , 1H), 4.91 (d,  $J = 10.9 \text{ Hz}$ , 1H), 4.72 - 4.53 (m, 4H), 4.47 (d,  $J = 12.1 \text{ Hz}$ , 1H), 4.36 (ddd,  $J = 9.8, 4.5, 2.0 \text{ Hz}$ , 1H), 3.97 (ddd,  $J = 11.5, 8.8, 4.9 \text{ Hz}$ , 1H), 3.88 - 3.76 (m, 7H), 3.69 - 3.56 (m, 2H), 2.45 (ddd,  $J = 13.7, 4.6, 1.0 \text{ Hz}$ , 1H), 2.09 (ddd,  $J = 13.3, 11.6, 5.6 \text{ Hz}$ , 1H); <sup>13</sup>C NMR (75 MHz, CDCl<sub>3</sub>)  $\delta$  149.2, 149.1, 138.6, 138.5, 138.2, 128.6, 128.5 (2), 128.1, 128.0, 127.9 (2), 127.8 (2), 125.8, 125.6, 116.0, 111.6, 85.1, 78.7, 78.0, 75.2, 73.6, 72.0, 71.8, 69.3, 56.1, 56.0, 36.2; HRMS (ESI)  $m/z$  calcd for C<sub>35</sub>H<sub>38</sub>O<sub>6</sub>SNa [M + Na]<sup>+</sup> 609.2287, found 609.2289.

According to the general protocol C, (3,4,6-tri-*O*-benzyl-2-deoxy- $\beta$ -D-glucopyranosyl)tri-*n*-butylstannane<sup>1</sup> (106 mg, 0.150 mmol), 1,2-bis(3,4-dimethoxyphenyl)disulfane (33.8 mg, 0.100 mmol), KF (17.4 mg, 0.300 mmol), and 4,4'-di-*tert*-butyl-2,2'-dipyridyl (12.1 mg, 0.045 mmol) were added to anhydrous 1,4-dioxane (2.00 mL). The reaction mixture was stirred at 120 °C under 5W blue LED irradiation for 48 h and afforded after chromatographic purification on SiO<sub>2</sub> (Hexanes:EtOAc, 5:1) **27k** (33.4 mg, 60%) as a colorless oil.



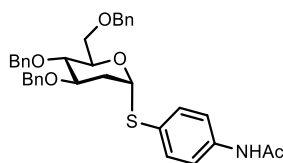

27I

**4-Acetylamino phenyl 3,4,6-tri-*O*-benzyl-2-deoxy-1-thio- $\alpha$ -D-glucopyranoside (27I).** According to the general protocol B, (3,4,6-tri-*O*-benzyl-2-deoxy- $\beta$ -D-glucopyranosyl)tri-*n*-butylstannane<sup>1</sup> (106 mg, 0.150 mmol), 1,2-bis(4-acetylamino phenyl)disulfane (33.2 mg, 0.100 mmol), KF (17.4 mg, 0.300 mmol), 4,4'-di-*tert*-butyl-2,2'-dipyridyl (12.1 mg, 0.045 mmol), and CuCl (4.00 mg, 0.040 mmol) were added to anhydrous 1,4-dioxane (2.00 mL). The reaction mixture was stirred at 120 °C under 5W blue LED irradiation for 96 h and afforded after chromatographic purification on SiO<sub>2</sub> (Hexanes:EtOAc, 1:1) **27I** (47.3 mg, 81%) as a colorless foam:  $[\alpha]_D^{24} = +18.5$  (c = 3.50, CHCl<sub>3</sub>); IR (ATR)  $\nu = 3316, 3033, 2918, 2869, 1674, 1596, 1532, 1499, 1458, 1402, 1372, 1316, 1257, 1097, 1033, 836, 743, 702$  cm<sup>-1</sup>; <sup>1</sup>H NMR (300 MHz, CDCl<sub>3</sub>)  $\delta$  7.39 - 7.27 (m, 17H), 7.22 - 7.19 (m, 2H), 7.11 (s, 1H), 5.59 (d,  $J = 5.4$  Hz, 1H), 4.90 (d,  $J = 10.9$  Hz, 1H), 4.71 - 4.52 (m, 4H), 4.45 (d,  $J = 12.0$  Hz, 1H), 4.30 (dd,  $J = 10.0, 3.0$  Hz, 1H), 3.96 (ddd,  $J = 11.5, 8.6, 4.8$  Hz, 1H), 3.82 (dd,  $J = 10.6, 4.1$  Hz, 1H), 3.68 - 3.60 (m, 2H), 2.44 (dd,  $J = 13.4, 4.9$  Hz, 1H), 2.16 - 2.05 (m, 4H); <sup>13</sup>C NMR (75 MHz, CDCl<sub>3</sub>)  $\delta$  168.3, 138.6, 138.5, 138.3, 137.4, 132.9, 129.8, 128.6, 128.5(2), 128.1, 128.0, 127.9 (2), 127.8, 127.7, 120.3, 84.6, 78.6, 78.0, 75.1, 73.6, 72.1, 71.9, 69.1, 36.3, 24.9; HRMS (ESI)  $m/z$  calcd for C<sub>35</sub>H<sub>37</sub>O<sub>5</sub>SNa [M + Na]<sup>+</sup> 606.2292, found 606.2292.

According to the general protocol C, (3,4,6-tri-*O*-benzyl-2-deoxy- $\beta$ -D-glucopyranosyl)tri-*n*-butylstannane<sup>1</sup> (106 mg, 0.150 mmol), 1,2-bis(4-acetamidophenyl)disulfane (33.2 mg, 0.100 mmol), KF (17.4 mg, 0.300 mmol), and 4,4'-di-*tert*-butyl-2,2'-dipyridyl (12.1 mg, 0.045 mmol) were added to anhydrous 1,4-dioxane (2.00 mL). The reaction mixture was stirred at 120 °C under 5W blue LED irradiation for 48 h and afforded after chromatographic purification on SiO<sub>2</sub> (Hexanes:EtOAc, 1:1) **27I** (40.8 mg, 70%) as a colorless foam.

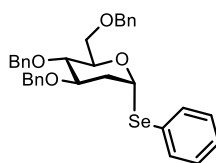

27m

**Phenyl 3,4,6-tri-*O*-benzyl-2-deoxy-1-seleno- $\alpha$ -D-glucopyranoside (27m).** According to the general protocol B, (3,4,6-tri-*O*-benzyl-2-deoxy- $\beta$ -D-glucopyranosyl)tri-*n*-butylstannane<sup>1</sup> (106 mg, 0.150 mmol), 1,2-diphenyldiselenane (31.2 mg, 0.100 mmol), KF (17.4 mg, 0.300 mmol), 2,2':6',2''-terpyridine ( 5.8 mg, 0.025 mmol), and CuCl (2.00 mg, 0.020 mmol) were added to anhydrous *m*-xylene and 1,4-dioxane (1:1, 2.00 mL). The reaction mixture was stirred at 130 °C for 96 h and afforded after chromatographic purification on SiO<sub>2</sub> (Hexanes:EtOAc, 10:1) **27m** (29.8 mg, 48%,  $\alpha$ : $\beta$  = 5:1) as a light yellow oil:  $[\alpha]_D^{25} = +17.3$  (c = 5.00, CHCl<sub>3</sub>); IR (ATR)  $\nu = 3063, 3033, 2910, 2866, 1581, 1458, 1365, 1190, 1097, 1030, 951, 735, 698, 624, 568$  cm<sup>-1</sup>; <sup>1</sup>H NMR (300 MHz, CDCl<sub>3</sub>)  $\delta$  7.59 - 7.54 (m, 2H), 7.38 - 7.19 (m, 18H), 6.00 (d,  $J = 5.4$ , 1H), 4.91 (d,  $J = 10.8$ , 1H), 4.71 - 4.45 (m, 5H), 4.24 (ddd,  $J = 9.9, 4.1, 2.1$  Hz, 1H), 3.96 - 3.75 (m, 2H), 3.71 - 3.63 (m, 2H), 2.55 (ddd,  $J = 13.6, 4.9, 1.4$  Hz, 1H), 2.19 (ddd,  $J = 13.5, 11.5, 5.3$  Hz, 1H); <sup>13</sup>C NMR (75 MHz, CDCl<sub>3</sub>)  $\delta$  138.6, 138.5, 138.2, 133.8, 129.2, 128.6, 128.5 (2), 128.1, 128.0, 127.9 (2), 127.8 (2), 127.5, 82.5, 78.7, 78.4, 75.2, 73.6, 73.5, 72.0, 68.9, 37.5; HRMS (ESI)  $m/z$  calcd for C<sub>33</sub>H<sub>34</sub>O<sub>4</sub>SeNa [M + Na]<sup>+</sup> 597.1520, found 597.1521.

According to the general protocol C, (3,4,6-tri-*O*-benzyl-2-deoxy- $\beta$ -D-glucopyranosyl)tri-*n*-butylstannane<sup>1</sup> (106 mg, 0.150 mmol), 1,2-diphenyldisilane (31.2 mg, 0.100 mmol), KF (17.4 mg, 0.300 mmol), and 4,4'-*tert*-butyl-2,2'-dipyridyl (12.1 mg, 0.045 mmol) were added to anhydrous 1,4-dioxane (2.00 mL). The reaction mixture was stirred at 120 °C under 5W blue LED irradiation for 48 h and afforded after chromatographic purification on SiO<sub>2</sub> (Hexanes:EtOAc, 10:1) **27m** (35.4 mg, 57%) as a light yellow oil.

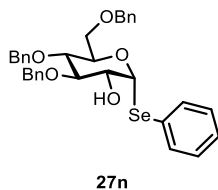

**Phenyl 3,4,6-tri-*O*-benzyl-1-seleno- $\alpha$ -D-glucopyranoside (27n).** According to the general protocol B, (3,4,6-tri-*O*-benzyl- $\beta$ -D-glucopyranosyl)tri-*n*-butylstannane<sup>1</sup> (109 mg, 0.150 mmol), 1,2-diphenyldisilane (31.2 mg, 0.100 mmol), KF (17.4 mg, 0.300 mmol), 2,2':6',2''-terpyridine (5.80 mg, 0.025 mmol), and CuCl (2.00 mg, 0.020 mmol) were added to anhydrous *m*-xylene and 1,4-dioxane (1:1, 2.00 mL). The reaction mixture was stirred at 130 °C for 96 h and afforded after chromatographic purification on SiO<sub>2</sub> (Hexanes:EtOAc, 5:1) **27n** (38.9 mg, 66%,  $\alpha$ : $\beta$  = 4:1) as a light yellow oil:  $[\alpha]_D^{23} = +24.2$  ( $c = 11.2$ , CHCl<sub>3</sub>); IR (ATR)  $\nu = 3450, 3063, 3033, 2869, 1581, 1499, 1458, 1361, 1212, 1074, 1048, 914, 735, 298, 620, 575, 553$  cm<sup>-1</sup>; <sup>1</sup>H NMR (300 MHz, CDCl<sub>3</sub>)  $\delta$  7.64 - 7.60 (m, 2H), 7.40 - 7.27 (m, 14H), 7.26 - 7.18 (m, 4H), 5.95 (d,  $J = 5.1$  Hz, 1H), 4.94 - 4.82 (m, 3H), 4.65 - 4.50 (m, 2H), 4.47 (d,  $J = 12.0$  Hz, 1H), 4.24 (ddd,  $J = 9.7, 3.8, 2.1$  Hz, 1H), 3.91 (dt,  $J = 9.2, 5.4$  Hz, 1H), 3.83 (dd,  $J = 10.9, 3.8$  Hz, 1H), 3.78 - 3.58 (m, 3H), 2.39 (d,  $J = 5.9$  Hz, 1H); <sup>13</sup>C NMR (75 MHz, CDCl<sub>3</sub>)  $\delta$  138.5, 138.1, 138.0, 134.4, 129.2 (2), 128.7, 128.6, 128.5, 128.1, 128.0 (2), 127.9, 127.8, 89.8, 84.4, 77.3, 75.5, 75.1, 73.9, 73.6, 72.8, 68.5; HRMS (ESI)  $m/z$  calcd for C<sub>33</sub>H<sub>34</sub>O<sub>5</sub>SeNa [M + Na]<sup>+</sup> 613.1469, found 613.1475.

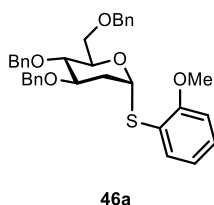

**2-Methoxyphenyl 3,4,6-tri-*O*-benzyl-2-deoxy-1-thio- $\alpha$ -D-glucopyranoside (46a).** According to the general protocol C, (3,4,6-tri-*O*-benzyl-2-deoxy- $\beta$ -D-glucopyranosyl)tri-*n*-butylstannane<sup>1</sup> (106 mg, 0.150 mmol), 1,2-bis(2-methoxyphenyl)disulfane (27.8 mg, 0.100 mmol), KF (17.4 mg, 0.300 mmol), and 4,4'-*tert*-butyl-2,2'-dipyridyl (12.1 mg, 0.045 mmol) were added to anhydrous 1,4-dioxane (2.00 mL). The reaction mixture was stirred at 120 °C under 5W blue LED irradiation for 48 h and afforded after chromatographic purification on SiO<sub>2</sub> (Hexanes:EtOAc, 8:1) **46a** (25.1 mg, 45%) as a colorless oil:  $[\alpha]_D^{29} = +17.8$  ( $c = 5.05$ , CHCl<sub>3</sub>); IR (ATR)  $\nu = 3067, 3033, 2921, 2866, 1585, 1480, 1458, 1365, 1275, 1249, 1194, 1097, 1074, 1030, 952, 851, 739, 702$  cm<sup>-1</sup>; <sup>1</sup>H NMR (300 MHz, CDCl<sub>3</sub>)  $\delta$  7.53 (dd,  $J = 7.7, 1.7$  Hz, 1H), 7.41 - 7.26 (m, 13H), 7.24 - 7.16 (m, 3H), 6.92 - 6.82 (m, 2H), 5.82 (d,  $J = 5.5$  Hz, 1H), 4.91 (d,  $J = 10.9$  Hz, 1H), 4.73 - 4.50 (m, 4H), 4.42 (d,  $J = 12.1$  Hz, 1H), 4.31 - 4.24 (m, 1H), 4.13 - 4.01 (m, 1H), 3.87 (s, 3H), 3.84 - 3.77 (m, 1H), 3.72 - 3.54 (m, 2H), 2.51 (ddd,  $J = 13.4, 5.0, 1.4$  Hz, 1H), 2.14 (ddd,  $J = 13.5, 11.6, 5.7$  Hz, 1H); <sup>13</sup>C NMR (75 MHz, CDCl<sub>3</sub>)  $\delta$  158.0, 138.7, 138.6, 138.3, 132.5, 128.6, 128.5 (2), 128.4, 128.0, 127.8 (2), 127.7 (2), 122.8, 121.4, 110.7, 81.9, 78.6, 78.2, 75.1, 73.5, 72.0, 71.9, 68.9, 55.9, 36.2; HRMS (ESI)  $m/z$  calcd for C<sub>34</sub>H<sub>36</sub>O<sub>5</sub>SNa [M + Na]<sup>+</sup> 579.2181, found 579.2185.

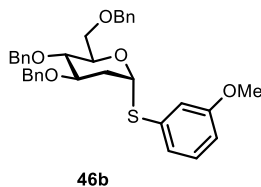

**3-Methoxyphenyl 3,4,6-tri-*O*-benzyl-2-deoxy-1-thio- $\alpha$ -D-glucopyranoside (46b).** According to the general protocol C, (3,4,6-tri-*O*-benzyl-2-deoxy- $\beta$ -D-glucopyranosyl)tri-*n*-butylstannane<sup>1</sup> (106 mg, 0.150 mmol), 1,2-bis(3-methoxyphenyl)disulfane (27.8 mg, 0.100 mmol), KF (17.4 mg, 0.300 mmol), and 4,4'-di-*tert*-butyl-2,2'-dipyridyl (12.1 mg, 0.045 mmol) were added to anhydrous 1,4-dioxane (2.00 mL). The reaction mixture was stirred at 120 °C under 5W blue LED irradiation for 48 h and afforded after chromatographic purification on SiO<sub>2</sub> (Hexanes:EtOAc, 8:1) **46b** (29.0 mg, 52%) as a colorless oil:  $[\alpha]_D^{28} = +19.5$  ( $c = 5.20$ , CHCl<sub>3</sub>); IR (ATR)  $\nu = 3061, 3033, 2921, 2869, 1592, 1480, 1458, 1369, 1287, 1253, 1194, 1097, 1048, 1033, 955, 866, 739, 702$  cm<sup>-1</sup>; <sup>1</sup>H NMR (300 MHz, CDCl<sub>3</sub>)  $\delta$  7.40 - 7.13 (m, 16H), 7.07 - 7.01 (m, 2H), 6.77 (ddd,  $J = 8.2, 2.4, 1.2$  Hz, 1H), 5.73 (d,  $J = 5.6$ , 1H), 4.91 (d,  $J = 10.9$  Hz, 1H), 4.74 - 4.52 (m, 4H), 4.47 (d,  $J = 12.1$  Hz, 1H), 4.29 (ddd,  $J = 9.7, 4.1, 2.0$  Hz, 1H), 3.97 (ddd,  $J = 11.5, 8.7, 4.8$  Hz, 1H), 3.83 (dd,  $J = 10.7, 4.0$  Hz, 1H), 3.75 (s, 3H), 3.71 - 3.57 (m, 2H), 2.46 (ddd,  $J = 13.4, 4.9, 1.4$  Hz, 1H), 2.14 (ddd,  $J = 13.5, 11.6, 5.7$  Hz, 1H); <sup>13</sup>C NMR (75 MHz, CDCl<sub>3</sub>)  $\delta$  159.9, 138.6, 138.5, 138.2, 136.4, 129.8, 128.6, 128.5 (2), 128.1, 128.0, 127.9 (2), 127.8, 127.7, 123.3, 116.1, 113.2, 84.1, 78.5, 78.1, 75.1, 73.5, 72.1, 71.9, 69.0, 55.4, 36.4; HRMS (ESI)  $m/z$  calcd for C<sub>34</sub>H<sub>36</sub>O<sub>5</sub>SNa [M + Na]<sup>+</sup> 579.2181, found 579.2190.

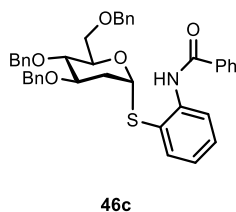

**2-Benzamidopheny 3,4,6-tri-*O*-benzyl-2-deoxy-1-thio- $\alpha$ -D-glucopyranoside (46c).** According to the general protocol C, (3,4,6-tri-*O*-benzyl-2-deoxy- $\beta$ -D-glucopyranosyl)tri-*n*-butylstannane<sup>1</sup> (106 mg, 0.150 mmol), *N,N'*-(disulfanediy)bis(2,1-phenylene)dibenzamide (45.6 mg, 0.100 mmol), KF (17.4 mg, 0.300 mmol), and 4,4'-di-*tert*-butyl-2,2'-dipyridyl (12.1 mg, 0.045 mmol) were added to anhydrous 1,4-dioxane (2.00 mL). The reaction mixture was stirred at 120 °C under 5W blue LED irradiation for 48 h and afforded after chromatographic purification on SiO<sub>2</sub> (Hexanes:EtOAc, 5:1) **46c** (51.6 mg, 80%,  $\alpha$ : $\beta = 10$ :1) as a colorless oil:  $[\alpha]_D^{29} = +11.3$  ( $c = 15.1$ , CHCl<sub>3</sub>); IR (ATR)  $\nu = 3361, 3029, 2866, 1681, 1581, 1514, 1495, 1436, 1365, 1305, 1249, 1194, 1097, 1030, 739, 702$  cm<sup>-1</sup>; <sup>1</sup>H NMR (300 MHz, CDCl<sub>3</sub>)  $\delta$  9.28 (s, 1H), 8.57 (dd,  $J = 8.3, 1.4$  Hz, 1H), 7.99 - 7.90 (m, 2H), 7.61 - 7.27 (m, 17H), 7.22 - 7.16 (m, 2H), 7.08 - 6.93 (m, 1H), 5.42 (dd,  $J = 5.3, 2.2$  Hz, 1H), 4.86 (d,  $J = 10.9$  Hz, 1H), 4.75 - 4.48 (m, 4H), 4.39 (d,  $J = 12.0$  Hz, 1H), 4.28 - 4.18 (m, 1H), 4.00 (tdd,  $J = 10.9, 5.0, 3.0$  Hz, 1H), 3.74 - 3.32 (m, 3H), 2.42 (ddd,  $J = 13.6, 4.8, 2.2$  Hz, 1H), 2.17 - 2.01 (m, 1H); <sup>13</sup>C NMR (75 MHz, CDCl<sub>3</sub>)  $\delta$  165.3, 139.8, 138.4, 138.3, 138.0, 136.1, 135.2, 132.5, 132.2, 132.0, 130.5, 129.0, 128.6, 128.5 (2), 128.1 (2), 128.0 (2), 127.9, 127.8 (3), 127.7, 127.2, 124.5, 122.2, 120.6, 85.5, 77.8, 77.5, 74.8, 73.6, 73.3, 72.1, 68.5, 36.4; HRMS (ESI)  $m/z$  calcd for C<sub>40</sub>H<sub>39</sub>O<sub>5</sub>SNNa [M + Na]<sup>+</sup> 668.2447, found 668.2474.

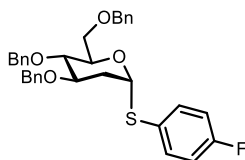

46d

**4-Fluorophenyl 3,4,6-tri-*O*-benzyl-2-deoxy-1-thio- $\alpha$ -D-glucopyranoside (46d).** According to the general protocol C, (3,4,6-tri-*O*-benzyl-2-deoxy- $\beta$ -D-glucopyranosyl)tri-*n*-butylstannane<sup>1</sup> (106 mg, 0.150 mmol), 1,2-bis(4-fluorophenyl)disulfane (25.4 mg, 0.100 mmol), KF (17.4 mg, 0.300 mmol), and 4,4'-di-*tert*-butyl-2,2'-dipyridyl (12.1 mg, 0.045 mmol) were added to anhydrous 1,4-dioxane (2.00 mL). The reaction mixture was stirred at 120 °C under 5W blue LED irradiation for 48 h and afforded after chromatographic purification on SiO<sub>2</sub> (Hexanes:EtOAc, 10:1) **46d** (30.5 mg, 55%) as a colorless oil:  $[\alpha]_D^{29} = +19.2$  ( $c = 6.40$ , CHCl<sub>3</sub>); IR (ATR)  $\nu = 3033, 2921, 2866, 1592, 1495, 1458, 1369, 1231, 1160, 1093, 1033, 952, 836, 739, 702$  cm<sup>-1</sup>; <sup>1</sup>H NMR (300 MHz, CDCl<sub>3</sub>)  $\delta$  7.49 - 7.40 (m, 2H), 7.39 - 7.26 (m, 13H), 7.25 - 7.19 (m, 2H), 6.97 - 6.79 (m, 2H), 5.57 (d,  $J = 5.7$  Hz, 1H), 4.91 (d,  $J = 10.9$  Hz, 1H), 4.73 - 4.52 (m, 4H), 4.47 (d,  $J = 11.9$  Hz, 1H), 4.37 - 4.28 (m, 1H), 4.03 - 3.90 (m, 1H), 3.81 (dd,  $J = 10.6, 4.6$  Hz, 1H), 3.74 - 3.49 (m, 2H), 2.44 (ddd,  $J = 13.5, 5.0, 1.4$  Hz, 1H), 2.11 (ddd,  $J = 13.5, 11.6, 5.7$  Hz, 1H); <sup>13</sup>C NMR (75 MHz, CDCl<sub>3</sub>)  $\delta$  164.2, 160.9, 138.5 (2), 138.2, 134.4, 134.2, 129.8 (2), 128.6, 128.5 (2), 128.1, 128.0, 127.9 (2), 127.8 (2), 116.2, 115.9, 84.7, 78.6, 78.0, 75.2, 73.6, 72.1, 71.8, 69.1, 36.2; <sup>19</sup>F NMR (282 MHz, CDCl<sub>3</sub>)  $\delta$  -114.28; HRMS (ESI)  $m/z$  calcd for C<sub>33</sub>H<sub>33</sub>O<sub>4</sub>SFNa [M + Na]<sup>+</sup> 567.1981, found 567.1995.

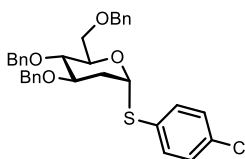

46e

**4-Chlorophenyl 3,4,6-tri-*O*-benzyl-2-deoxy-1-thio- $\alpha$ -D-glucopyranoside (46e).** According to the general protocol A, (3,4,6-tri-*O*-benzyl-2-deoxy- $\beta$ -D-glucopyranosyl)tri-*n*-butylstannane<sup>1</sup> (106 mg, 0.150 mmol), 1,2-bis(4-chlorophenyl)disulfane (28.7 mg, 0.100 mmol), KF (17.4 mg, 0.300 mmol), and 4,4'-di-*tert*-butyl-2,2'-dipyridyl (12.1 mg, 0.045 mmol) were added to anhydrous 1,4-dioxane (2.00 mL). The reaction mixture was stirred at 120 °C under 5W blue LED irradiation for 48 h and afforded after chromatographic purification on SiO<sub>2</sub> (Hexanes:EtOAc, 9:1) **46e** (25.2 mg, 45%) as a colorless oil:  $[\alpha]_D^{29} = +19.3$  ( $c = 5.50$ , CHCl<sub>3</sub>); IR (ATR)  $\nu = 3033, 2921, 2862, 1499, 1480, 1458, 1365, 1194, 1093, 1030, 1015, 952, 821, 739, 702$  cm<sup>-1</sup>; <sup>1</sup>H NMR (300 MHz, CDCl<sub>3</sub>)  $\delta$  7.42 - 7.18 (m, 19H), 5.64 (d,  $J = 5.7$ , 1H), 4.91 (d,  $J = 10.9$  Hz, 1H), 4.72 - 4.41 (m, 5H), 4.28 (ddd,  $J = 9.8, 4.4, 2.0$  Hz, 1H), 3.96 (ddd,  $J = 11.6, 8.7, 4.9$  Hz, 1H), 3.80 (dd,  $J = 10.6, 4.4$  Hz, 1H), 3.70 - 3.55 (m, 2H), 2.44 (ddd,  $J = 13.5, 4.9, 1.4$  Hz, 1H), 2.13 (ddd,  $J = 13.5, 11.6, 5.7$  Hz, 1H); <sup>13</sup>C NMR (75 MHz, CDCl<sub>3</sub>)  $\delta$  138.5, 138.4, 138.1, 133.5, 133.4, 132.8, 129.2, 129.1, 128.6, 128.5 (2), 128.1, 128.0, 127.9, 127.8 (2), 84.2, 78.5, 77.9, 75.2, 73.6, 72.1, 71.9, 69.0, 36.2; HRMS (ESI)  $m/z$  calcd for C<sub>33</sub>H<sub>33</sub>O<sub>4</sub>ClSNa [M + Na]<sup>+</sup> 583.1686, found 583.1702.

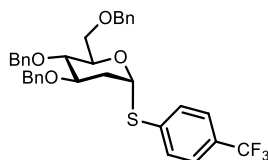

46f

**4-(Trifluoromethyl)phenyl 3,4,6-tri-*O*-benzyl-2-deoxy-1-thio- $\alpha$ -D-glucopyranoside (46f).** According to the general protocol C, (3,4,6-tri-*O*-benzyl-2-deoxy- $\beta$ -D-glucopyranosyl)tri-*n*-butylstannane<sup>1</sup> (106 mg, 0.150 mmol), 1,2-bis(4-(trifluoromethyl)phenyl)disulfane (35.4 mg, 0.100 mmol), KF (17.4 mg, 0.300 mmol), and 4,4'-di-*tert*-butyl-2,2'-dipyridyl (12.1 mg, 0.045 mmol) were added to anhydrous 1,4-dioxane (2.00 mL). The reaction mixture was stirred at 120 °C under 5W blue LED irradiation for 48 h and afforded after chromatographic purification on SiO<sub>2</sub> (Hexanes:EtOAc, 10:1) **46f** (37.8 mg, 67%) as a white foam:  $[\alpha]_D^{29} = +15.2$  (*c* = 3.40, CHCl<sub>3</sub>); IR (ATR)  $\nu = 3033, 2925, 2869, 1611, 1499, 1458, 1406, 1328, 1167, 1127, 1093, 1067, 1019, 1033, 955, 836, 739, 702 \text{ cm}^{-1}$ ; <sup>1</sup>H NMR (300 MHz, CDCl<sub>3</sub>)  $\delta$  7.60 - 7.52 (m, 2H), 7.49 - 7.42 (m, 2H), 7.40 - 7.26 (m, 13H), 7.24 - 7.15 (m, 2H), 5.78 (d, *J* = 6.4 Hz, 1H), 4.91 (d, *J* = 10.9 Hz, 1H), 4.73 - 4.51 (m, 4H), 4.46 (d, *J* = 11.9 Hz, 1H), 4.24 (ddd, *J* = 9.7, 4.3, 2.0 Hz, 1H), 3.96 (ddd, *J* = 11.6, 8.6, 4.9 Hz, 1H), 3.81 (dd, *J* = 10.7, 4.3 Hz, 1H), 3.72 - 3.59 (m, 2H), 2.44 (ddd, *J* = 13.6, 4.9, 1.4 Hz, 1H), 2.17 (ddd, *J* = 13.6, 11.6, 5.7 Hz, 1H); <sup>13</sup>C NMR (75 MHz, CDCl<sub>3</sub>)  $\delta$  140.5, 138.4 (2), 138.1, 130.0, 128.6, 128.5 (2), 128.1, 128.0, 127.9, 127.9, 127.9, 125.8 - 125.7 (m), 122.4, 83.3, 78.4, 77.9, 75.2, 73.6, 72.1, 72.1, 69.0, 36.2; <sup>19</sup>F NMR (282 MHz, CDCl<sub>3</sub>)  $\delta$  -62.6; HRMS (ESI) *m/z* calcd for C<sub>34</sub>H<sub>33</sub>O<sub>4</sub>SF<sub>3</sub>Na [M + Na]<sup>+</sup> 617.1949, found 617.1971.

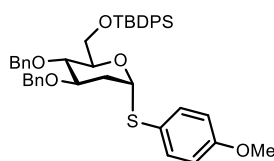

47a

**4-Methoxyphenyl 3,4-di-*O*-benzyl-6-*tert*-butyldiphenylsilyl-2-deoxy-1-thio- $\alpha$ -D-glucopyranoside (47a).** According to the general protocol C, (3,4-di-*O*-benzyl-6-*tert*-butyldiphenylsilyl-2-deoxy- $\beta$ -D-glucopyranosyl)tri-*n*-butylstannane **S5** (128.3 mg, 0.150 mmol), 1,2-bis(2-methoxyphenyl)disulfane (27.8 mg, 0.100 mmol), KF (17.4 mg, 0.300 mmol), and 4,4'-di-*tert*-butyl-2,2'-dipyridyl (12.1 mg, 0.045 mmol) were added to anhydrous 1,4-dioxane (2.00 mL). The reaction mixture was stirred at 120 °C under 5W blue LED irradiation for 48 h and afforded after chromatographic purification on SiO<sub>2</sub> (Hexanes:EtOAc, 20:1) **47a** (63.4 mg, 90%) as a colorless oil:  $[\alpha]_D^{29} = +9.9$  (*c* = 19.5, CHCl<sub>3</sub>); IR (ATR)  $\nu = 3070, 3033, 2933, 2858, 1696, 1462, 1499, 1462, 1432, 1365, 1290, 1249, 1182, 1156, 1093, 1033, 948, 829, 743, 706 \text{ cm}^{-1}$ ; <sup>1</sup>H NMR (300 MHz, CDCl<sub>3</sub>)  $\delta$  7.75 - 7.64 (m, 4H), 7.47 - 7.20 (m, 18H), 6.82 - 6.71 (m, 2H), 5.55 (dd, *J* = 5.8, 1.3 Hz, 1H), 4.99 (d, *J* = 10.9 Hz, 1H), 4.77 - 4.66 (m, 3H), 4.29 (ddd, *J* = 9.6, 4.0, 1.8 Hz, 1H), 4.10 - 3.89 (m, 3H), 3.77 (s, 3H), 3.75 - 3.66 (m, 1H), 2.50 (ddd, *J* = 13.3, 4.9, 1.4 Hz, 1H), 2.11 (ddd, *J* = 13.4, 11.6, 5.7 Hz, 1H), 1.08 (s, 9H); <sup>13</sup>C NMR (75 MHz, CDCl<sub>3</sub>)  $\delta$  159.4, 138.6, 138.5, 136.0, 135.7, 134.1, 134.0, 133.3, 129.7, 129.6, 128.6, 128.5, 128.1, 128.0, 127.9, 127.8 (2), 127.6, 125.8, 114.6, 85.1, 78.7, 78.1, 75.3, 73.1, 72.2, 63.2, 55.4, 36.5, 27.0, 19.5; HRMS (ESI) *m/z* calcd for C<sub>43</sub>H<sub>48</sub>O<sub>5</sub>SSiNa [M + Na]<sup>+</sup> 727.2889, found 727.2927.

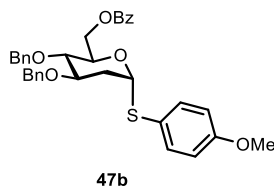

**4-Methoxyphenyl 3,4-di-*O*-benzyl-2-deoxy-1-thio- $\alpha$ -D-glucopyranoside (47b).** According to the general protocol C, (3,4-di-*O*-benzyl-6-*O*-benzoyl-2-deoxy- $\alpha$ -D-glucopyranosyl)tri-*n*-butylstannane **S7** (108.2 mg, 0.150 mmol), 1,2-bis(4-methoxyphenyl)disulfane (27.8 mg, 0.100 mmol), KF (17.4 mg, 0.300 mmol), and 4,4'-di-*tert*-butyl-2,2'-dipyridyl (12.1 mg, 0.045 mmol) were added to anhydrous 1,4-dioxane (2.00 mL). The reaction mixture was stirred at 120 °C under 5W blue LED irradiation for 48 h and afforded after chromatographic purification on SiO<sub>2</sub> (Hexanes:EtOAc, 4:1) **47b** (49.6 mg, 87%) as a light yellow oil:  $[\alpha]_D^{29} = +15.7$  ( $c = 13.7$ , CHCl<sub>3</sub>); IR (ATR)  $\nu = 3033, 2925, 1722, 1596, 1499, 1458, 1279, 1249, 1179, 1093, 1030, 832, 717, 702$  cm<sup>-1</sup>; <sup>1</sup>H NMR (300 MHz, CDCl<sub>3</sub>)  $\delta$  8.03 - 7.95 (m, 2H), 7.61 - 7.52 (m, 1H), 7.48 - 7.30 (m, 14H), 6.73 - 6.62 (m, 2H), 5.51 (dd,  $J = 5.6, 1.4$  Hz, 1H), 4.99 (d,  $J = 10.9$  Hz, 1H), 4.81 - 4.49 (m, 6H), 4.06 (ddd,  $J = 11.4, 8.5, 4.8$  Hz, 1H), 3.72 (s, 3H), 3.57 (td,  $J = 9.1, 4.7$  Hz, 1H), 2.51 (ddd,  $J = 13.4, 4.9, 1.4$  Hz, 1H), 2.11 (ddd,  $J = 13.4, 11.6, 5.7$  Hz, 1H); <sup>13</sup>C NMR (75 MHz, CDCl<sub>3</sub>)  $\delta$  166.4, 159.7, 138.3, 138.1, 134.5, 133.1, 130.2, 129.9, 128.7, 128.6, 128.4, 128.3, 128.0 (2), 127.9, 127.1, 124.7, 114.7, 84.9, 78.6, 78.0, 75.2, 72.0, 70.3, 64.2, 55.4, 36.1; HRMS (ESI)  $m/z$  calcd for C<sub>34</sub>H<sub>34</sub>O<sub>6</sub>SNa [M + Na]<sup>+</sup> 593.1974, found 593.1980.

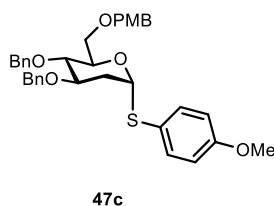

**4-Methoxyphenyl 3,4-di-*O*-benzyl-6-*O*-(4-methoxybenzyl)-2-deoxy- $\beta$ -D-glucopyranoside (47c).** According to the general protocol C, (3,4-di-*O*-benzyl-6-*O*-(4-methoxybenzyl)-2-deoxy- $\beta$ -D-glucopyranosyl)tri-*n*-butylstannane **S9** (110.7 mg, 0.150 mmol), 1,2-bis(4-methoxyphenyl)disulfane (27.8 mg, 0.100 mmol), KF (17.4 mg, 0.300 mmol), and 4,4'-di-*tert*-butyl-2,2'-dipyridyl (12.1 mg, 0.045 mmol) were added to anhydrous 1,4-dioxane (2.00 mL). The reaction mixture was stirred at 120 °C under 5W blue LED irradiation for 48 h and afforded after chromatographic purification on SiO<sub>2</sub> (Hexanes:EtOAc, 6:1) **47c** (41.0 mg, 70%) as a light yellow oil:  $[\alpha]_D^{29} = +9.0$  ( $c = 2.15$ , CHCl<sub>3</sub>); IR (ATR)  $\nu = 3448, 2929, 2836, 1614, 1596, 1581, 1499, 1458, 1369, 1290, 1249, 1179, 1097, 1033, 832, 743, 702$  cm<sup>-1</sup>; <sup>1</sup>H NMR (300 MHz, CDCl<sub>3</sub>)  $\delta$  7.43 - 7.26 (m, 11H), 7.25 - 7.17 (m, 3H), 6.88 - 6.79 (m, 2H), 6.79 - 6.71 (m, 2H), 5.50 (d,  $J = 5.3$  Hz, 1H), 4.89 (d,  $J = 10.9$  Hz, 1H), 4.72 - 4.46 (m, 4H), 4.43 - 4.29 (m, 2H), 3.96 (ddd,  $J = 11.6, 8.7, 4.9$  Hz, 1H), 3.82 - 3.71 (m, 7H), 3.68 - 3.50 (m, 2H), 2.49 - 2.37 (m, 1H), 2.14 - 2.00 (m, 1H); <sup>13</sup>C NMR (75 MHz, CDCl<sub>3</sub>)  $\delta$  159.6, 159.3, 138.6 (2), 134.7, 132.8, 130.4, 130.1, 129.8, 129.7, 128.6, 128.5 (2), 128.0, 127.9, 127.8 (2), 125.1, 114.8, 114.6, 113.9, 113.8, 85.1, 78.7, 78.0, 75.1, 73.2, 72.0, 71.7, 68.7, 55.4, 55.4, 36.2; HRMS (ESI)  $m/z$  calcd for C<sub>35</sub>H<sub>38</sub>O<sub>6</sub>SNa [M + Na]<sup>+</sup> 609.2287, found 609.2303.

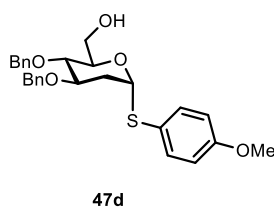

**4-Methoxyphenyl 3,4-di-*O*-benzyl-2-deoxy-1-thio- $\alpha$ -D-glucopyranoside (47d).** According to the general protocol C, (3,4-di-*O*-benzyl-2-deoxy- $\alpha$ -D-glucopyranosyl)tri-*n*-butylstannane **S6** (92.5 mg, 0.150 mmol), 1,2-bis(4-methoxyphenyl)disulfane (27.8 mg, 0.100 mmol), KF (17.4 mg, 0.300 mmol), and 4,4'-di-*tert*-butyl-2,2'-dipyridyl (12.1 mg, 0.045 mmol) were added to anhydrous 1,4-dioxane (2.00 mL). The reaction mixture was stirred at 120 °C under 5W blue LED irradiation for 48 h and afforded after chromatographic purification on SiO<sub>2</sub> (Hexanes:EtOAc, 3:1) **47d** (41.0 mg, 88%) as a light yellow oil:  $[\alpha]_D^{29} = +21.3$  ( $c = 16.1$ , CHCl<sub>3</sub>); IR (ATR)  $\nu = 3461, 3033, 2921, 2873, 1596, 1495, 1458, 1369, 1290, 1249, 1179, 1093, 1033, 948, 832, 739, 702$  cm<sup>-1</sup>; <sup>1</sup>H NMR (300 MHz, CDCl<sub>3</sub>)  $\delta$  7.44 - 7.28 (m, 12H), 6.91 - 6.80 (m, 2H), 5.49 - 5.41 (m, 1H), 4.96 (d,  $J = 11.0$  Hz, 1H), 4.76 - 4.59 (m, 3H), 4.23 (dtt,  $J = 9.3, 3.3, 1.6$  Hz, 1H), 4.09 - 3.94 (m, 1H), 3.79 (m, 5H), 3.52 (dd,  $J = 9.7, 8.7$  Hz, 1H), 2.46 (ddd,  $J = 13.5, 4.9, 1.4$  Hz, 1H), 2.03 (ddd,  $J = 13.5, 11.5, 5.7$  Hz, 1H), 1.71 (q,  $J = 5.0, 3.4$  Hz, 1H); <sup>13</sup>C NMR (75 MHz, CDCl<sub>3</sub>)  $\delta$  159.9, 138.5, 138.4, 135.1, 128.6, 128.2, 128.0, 127.9, 124.6, 114.8, 85.0, 78.6, 77.8, 75.1, 72.2, 72.0, 62.3, 55.4, 36.0; HRMS (ESI)  $m/z$  calcd for C<sub>27</sub>H<sub>30</sub>O<sub>5</sub>SNa [M + Na]<sup>+</sup> 489.1712, found 489.1703.

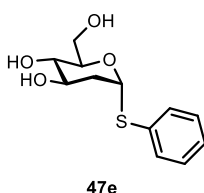

**4-Phenyl 2-deoxy-1-thio- $\alpha$ -D-glucopyranoside (47e).** According to the general protocol B, (2-deoxy- $\beta$ -D-glucopyranosyl)tri-*n*-butylstannane<sup>4</sup> (65.6 mg, 0.150 mmol), 1,2-bis(4-methoxyphenyl)disulfane (27.8 mg, 0.100 mmol), KF (17.4 mg, 0.300 mmol), and 4,4'-di-*tert*-butyl-2,2'-dipyridyl (12.1 mg, 0.045 mmol) were added to anhydrous 1,4-dioxane (2.00 mL). The reaction mixture was stirred at 120 °C under 5W blue LED irradiation for 48 h and afforded after chromatographic purification on SiO<sub>2</sub> (CH<sub>2</sub>Cl<sub>2</sub>:MeOH, 10:1) **47e** (23.5 mg, 82%) as a colorless oil:  $[\alpha]_D^{29} = +30.8$  ( $c = 11.9$ , MeOH); IR (ATR)  $\nu = 3342, 3065, 2925, 2884, 1588, 1484, 1443, 1235, 1186, 1071, 1045, 955, 851, 773, 743, 695$  cm<sup>-1</sup>; <sup>1</sup>H NMR (300 MHz, CD<sub>3</sub>OD)  $\delta$  7.58 - 7.46 (m, 2H), 7.41 - 7.16 (m, 3H), 5.64 (dtd,  $J = 5.6, 1.2, 0.6$  Hz, 1H), 4.07 (dddd,  $J = 9.7, 3.8, 3.2, 0.6$  Hz, 1H), 3.96 - 3.76 (m, 3H), 3.39 - 3.33 (m, 1H), 2.30 (ddd,  $J = 13.3, 5.0, 1.2$  Hz, 1H), 2.06 (ddd,  $J = 13.5, 11.9, 5.6$  Hz, 1H); <sup>13</sup>C NMR (75 MHz, CD<sub>3</sub>OD)  $\delta$  136.5, 132.7, 129.9, 128.2, 85.7, 74.8, 73.3, 70.6, 62.4, 49.0, 39.7; HRMS (ESI)  $m/z$  calcd for C<sub>12</sub>H<sub>16</sub>O<sub>4</sub>SNa [M + Na]<sup>+</sup> 279.0667, found 279.0664.

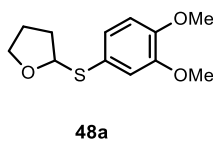

**2-(3,4-Dimethoxyphenyl)tetrahydrofuran (48a).** According to the general protocol C, 1tributyl(tetrahydrofuran-2-yl)stannane (54.2 mg, 0.150 mmol), 1,2-bis(3,4-dimethoxyphenyl)disulfane (33.8 mg, 0.100 mmol), KF (17.4 mg, 0.300 mmol), and 4,4'-di-*tert*-butyl-2,2'-dipyridyl (12.1 mg, 0.045 mmol) were added to anhydrous 1,4-dioxane (2.00 mL). The reaction mixture was stirred at 120 °C under 5W blue LED irradiation for 48 h and afforded after chromatographic purification on SiO<sub>2</sub> (Hexanes:EtOAc, 8:1) **48a** (17.1 mg, 82%) as a colorless oil: <sup>1</sup>H NMR (300 MHz, CDCl<sub>3</sub>)  $\delta$  7.14 - 7.04 (m, 2H), 6.85 - 6.76 (m, 1H), 5.55 - 5.48 (m, 1H), 4.07 - 3.90 (m, 2H), 3.88 (s, 3H), 3.86 (s, 3H), 2.43 - 2.25 (m, 1H), 2.07 - 1.78 (m, 3H); <sup>13</sup>C NMR (75 MHz, CDCl<sub>3</sub>)  $\delta$  149.0 (2), 126.1, 125.8, 116.1, 111.6, 88.3, 67.4, 56.1, 56.0, 32.6, 25.0. Characterization data matched the literature report.<sup>2</sup>

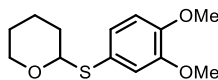

48b

**2-(3,4-Dimethoxyphenyl)tetrahydro-2H-pyran (48b).** According to the general protocol C, tributyl(tetrahydro-2H-pyran-2-yl)stannane (56.3 mg, 0.150 mmol), 1,2-bis(3,4-dimethoxyphenyl)disulfane (33.8 mg, 0.100 mmol), KF (17.4 mg, 0.300 mmol), and 4,4'-di-*tert*-butyl-2,2'-dipyridyl (12.1 mg, 0.045 mmol) were added to anhydrous 1,4-dioxane (2.00 mL). The reaction mixture was stirred at 120 °C under 5W blue LED irradiation for 48 h and afforded after chromatographic purification on SiO<sub>2</sub> (Hexanes:EtOAc, 8:1) **48b** (15.5 mg, 70%) as a colorless oil: <sup>1</sup>H NMR (300 MHz, CDCl<sub>3</sub>) δ 7.12 - 7.04 (m, 2H), 6.86 - 6.75 (m, 1H), 5.04 (dd, *J* = 6.3, 3.7 Hz, 1H), 4.27 - 4.10 (m, 1H), 3.87 (s, 3H), 3.86 (s, 3H), 3.65 - 3.48 (m, 1H), 2.09 - 1.94 (m, 1H), 1.91 - 1.55 (m, 5H); <sup>13</sup>C NMR (75 MHz, CDCl<sub>3</sub>) δ 149.0 (2), 125.8, 125.6, 116.1, 111.5, 86.4, 65.0, 56.1, 56.0, 31.7, 25.7, 22.0. Characterization data matched the literature report.<sup>2</sup>

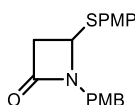

48c

**1-(4-Methoxybenzyl)-4-((4-methoxyphenyl)thio)azetidin-2-one (48c).** According to the general protocol C, 1-(4-methoxybenzyl)-4-(tributylstannyl)azetidin-2-one (72.2 mg, 0.150 mmol), 1,2-bis(4-methoxyphenyl)disulfane (27.8 mg, 0.100 mmol), KF (17.4 mg, 0.300 mmol), and 4,4'-di-*tert*-butyl-2,2'-dipyridyl (12.1 mg, 0.045 mmol) were added to anhydrous 1,4-dioxane (2.00 mL). The reaction mixture was stirred at 120 °C under 5W blue LED irradiation for 48 h and afforded after chromatographic purification on SiO<sub>2</sub> (Hexanes:EtOAc, 2:1) **48c** (29.0 mg, 88%) as a colorless oil: IR (ATR)  $\nu$  = 2955, 2840, 1756, 1614, 1596, 1514, 1499, 1465, 1391, 1290, 1249, 1179, 1108, 1033, 948, 832 cm<sup>-1</sup>; <sup>1</sup>H NMR (300 MHz, CDCl<sub>3</sub>) δ 7.40 - 7.28 (m, 2H), 7.17 - 7.04 (m, 2H), 6.97 - 6.67 (m, 4H), 4.78 - 4.57 (m, 2H), 4.05 (d, *J* = 14.9 Hz, 1H), 3.82 (s, 3H), 3.80 (s, 3H), 3.17 (dd, *J* = 14.9, 4.8 Hz, 1H), 2.75 (ddd, *J* = 14.9, 2.3, 1.0 Hz, 1H); <sup>13</sup>C NMR (75 MHz, CDCl<sub>3</sub>) δ 165.3, 160.7, 159.3, 137.2, 129.9, 127.7, 119.9, 115.1, 114.3, 58.2, 55.5, 55.4, 44.0, 43.8; HRMS (ESI) *m/z* calcd for C<sub>18</sub>H<sub>19</sub>O<sub>3</sub>SNa [M + Na]<sup>+</sup> 352.0983, found 352.0984.

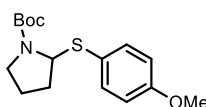

48d

***tert*-Butyl 2-((4-methoxyphenyl)thio)pyrrolidine-1-carboxylate (48d).** According to the general protocol C, *tert*-butyl 2-(tri-*n*-butylstannyl)pyrrolidine-1-carboxylate (69.0 mg, 0.150 mmol), 1,2-bis(3,4-dimethoxyphenyl)disulfane (33.8 mg, 0.100 mmol), KF (17.4 mg, 0.300 mmol), and 4,4'-di-*tert*-butyl-2,2'-dipyridyl (12.1 mg, 0.045 mmol) were added to anhydrous 1,4-dioxane (2.00 mL). The reaction mixture was stirred at 120 °C under 5W blue LED irradiation for 48 h and afforded after chromatographic purification on SiO<sub>2</sub> (Hexanes:EtOAc, 19:1) **48d** (25.9 mg, 84%) as a colorless oil: H NMR (300 MHz, CDCl<sub>3</sub>) δ 7.54 - 7.34 (m, 2H), 6.98 - 6.63 (m, 2H), 5.20 (d, *J* = 26.4 Hz, 1H), 3.79 (s, 3H), 3.34 (d, *J* = 26.7 Hz, 2H), 2.14 - 1.77 (m, 4H), 1.54 - 1.28 (m, 9H); <sup>13</sup>C NMR (75 MHz, CDCl<sub>3</sub>) δ 199.1, 153.7, 137.2, 124.4, 114.6, 80.1, 67.1, 55.4, 45.6, 33.6, 28.4, 22.3. Characterization data matched the literature report.<sup>4</sup>



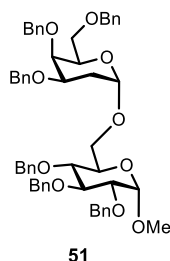

**Methyl 6-*O*-(2-deoxy-3,4,6-tris-*O*-benzyl- $\alpha$ -D-galactopyranosyl)-2,3,4-tris-*O*-benzyl- $\alpha$ -D-glucopyranoside (51).** According to the general protocol B, (3,4,6-tri-*O*-benzyl-2-deoxy- $\beta$ -D-galactopyranosyl)tri-*n*-butylstannane (159 mg, 0.225 mmol), 1,2-bis(4-methoxyphenyl)disulfane (41.7 mg, 0.150 mmol), KF (26.1 mg, 0.450 mmol), and 4,4'-di-*tert*-butyl-2,2'-dipyridyl (18.2 mg, 0.068 mmol) were added to anhydrous 1,4-dioxane (3.00 mL). The reaction mixture was stirred at 120 °C under 5W blue LED irradiation for 48 h and filtered through Celite® to obtain a crude mixture for next step. A solution of methyl 2,3,4-tri-*O*-benzyl- $\alpha$ -D-glucopyranoside **50** (46.4 mg, 0.100 mmol) and the crude mixture in dry CH<sub>2</sub>Cl<sub>2</sub> (5 mL) was stirred with powdered molecular sieves (4Å) under N<sub>2</sub> for 30 min. NIS (45 mg, 0.200 mmol) was added and stirring was continued for further 30 min, when after addition of a catalytic amount of AgOTf (2.6 mg, 0.010 mmol) the color of the reaction mixture turned deep yellow brown. The mixture was stirred for 10h, then Et<sub>3</sub>N was added to quench the mixture. After stirring for additional 20 min, the mixture was concentrated and afforded after chromatographic purification on SiO<sub>2</sub> (Hexanes:EtOAc, 6:1) **51** (63.4 mg, 72%,  $\alpha$ : $\beta$  =5:1) as a colorless oil: <sup>1</sup>H NMR (300 MHz, CDCl<sub>3</sub>)  $\delta$  7.43 -7.22 (m, 30H), 5.04 (d, *J* = 3.6 Hz, 1H), 5.00 (d, *J* = 10.8 Hz, 1H), 4.96 - 4.76 (m, 4H), 4.69 (d, *J* = 12.2 Hz, 1H), 4.65 - 4.50 (m, 5H), 4.39 (q, *J* = 11.8 Hz, 2H), 4.00 (dd, *J* = 9.6, 8.8 Hz, 1H), 3.94 - 3.69 (m, 5H), 3.68 - 3.42 (m, 5H), 3.33 (s, 3H), 2.22 (td, *J* = 12.5, 3.6 Hz, 1H), 2.03 (dd, *J* = 12.6, 4.5 Hz, 1H); <sup>13</sup>C NMR (75 MHz, CDCl<sub>3</sub>)  $\delta$  139.0, 138.9, 138.5, 138.4, 138.3 (2), 128.6, 128.5, 128.4, 128.3, 128.2 (2), 128.0, 127.8 (2), 127.7, 127.6, 127.5, 98.4, 98.0, 82.3, 80.1, 78.0, 77.4, 75.9, 75.1, 74.4, 74.3, 73.5, 73.4, 73.0, 70.4, 70.2, 69.9, 69.5, 66.2, 55.1, 31.1. Characterization data matched the literature report.<sup>5</sup>

## 5. Detailed Experimental Procedures for Compounds S1- S13

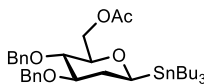

S1

**(3,4-Di-*O*-benzyl-6-*O*-acetyl-2-deoxy- $\beta$ -D-glucopyranosyl)tri-*n*-butylstannane (S1).** To a solution of *i*-Pr<sub>2</sub>NH (1.45 mL, 10.3 mmol) in anhydrous THF (15.0 mL), *n*-BuLi (6.20 mL, 9.95 mmol, 1.6 M in hexane) was added at 0 °C. After stirring for 15 min, Bu<sub>3</sub>SnH (3.00 mL, 10.6 mmol) was added, and the reaction mixture was stirred at -78 °C for another 15 min. The solution of Bu<sub>3</sub>SnLi in THF was warmed up to 0 °C. To a solution of 3,4-di-*O*-benzyl-6-*O*-*tert*-butyldiphenylsilyl-2-deoxy-D-glucose (2.00 g, 3.43 mmol) in CHCl<sub>3</sub>/PhMe (2:1, 15.0 mL) was added SOCl<sub>2</sub> (1.80 mL, 24.8 mmol). The resulting solution was stirred at rt for 0.5 h and concentrated under vacuum. The residue was dissolved in THF (20.0 mL) and added dropwise via syringe to the above freshly prepared solution of Bu<sub>3</sub>SnLi (9.95 mmol) in THF (15.0 mL) at 0 °C. The resulted reaction mixture was stirred at 0 °C for 1.5 h, quenched with water, and extracted with EtOAc (3 x 50.0 mL). The combined organic layer was dried over Na<sub>2</sub>SO<sub>4</sub>, concentrated, and was purified by short column on SiO<sub>2</sub> (Hexanes:EtOAc, 25:1) to obtain the crude product (117 mg, 4.0%) as a colorless oil. To a solution of the above product (117 mg, 0.137 mmol) in anhydrous THF (3.00 mL), TBAF solution (0.40 mL, 4.0 mmol, 1.00 M in THF) was added under N<sub>2</sub>. The reaction mixture was stirred at rt 12 h and concentrated under vacuum. The residue was dissolved in pyridine/Ac<sub>2</sub>O mixture (3:1, 4.00 mL) and stirred 12 h. After removal of the volatiles, the crude mixture was quenched with water, extracted with EtOAc (3 x 50.0 mL) and purified by column chromatography on SiO<sub>2</sub> (Hexanes:EtOAc, 50:1) to obtain **S1** (49.0 mg, 54%) as a colorless oil:  $[\alpha]_D^{22} = -0.7$  (c = 3.90, CHCl<sub>3</sub>); IR (ATR)  $\nu = 3033, 2955, 1745, 1596, 1499, 1458, 1368, 1290, 1249, 1097, 1033, 832, 743, 702, 650$  cm<sup>-1</sup>; <sup>1</sup>H NMR (300 MHz, CDCl<sub>3</sub>)  $\delta$  7.36 - 7.27 (m, 10H), 4.95 (d, *J* = 10.9 Hz, 1H), 4.75 - 4.59 (m, 3H), 4.31 (dd, *J* = 11.6, 2.2 Hz, 1H), 4.16 (dd, *J* = 11.6, 5.2 Hz, 1H), 3.67 - 3.54 (m, 2H), 3.38 (dd, *J* = 9.6, 8.5 Hz, 1H), 3.26 (ddd, *J* = 9.6, 5.2, 2.1 Hz, 1H), 2.15 (ddd, *J* = 13.0, 5.0, 2.0 Hz, 1H), 2.01 (s, 3H), 1.82 (td, *J* = 13.2, 10.7 Hz, 1H), 1.61 - 1.42 (m, 6H), 1.37 - 1.25 (m, 6H), 1.01 - 0.78 (m, 15H); <sup>13</sup>C NMR (75 MHz, CDCl<sub>3</sub>)  $\delta$  171.0, 138.8, 138.5, 134.9, 129.8, 128.6 (2), 128.3, 127.9, 127.8 (2), 83.0, 80.4, 79.0, 75.3, 71.6, 70.7, 64.4, 36.8, 29.2, 27.5, 21.0, 13.8, 8.8; HRMS (ESI) *m/z* calcd for C<sub>34</sub>H<sub>52</sub>O<sub>5</sub>SnNa [M + Na]<sup>+</sup> 683.2742, found 683.2750.

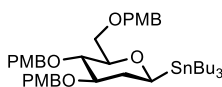

S2

**(3,4,6-Tri-*O*-(4-methoxybenzyl)-2-deoxy- $\beta$ -D-glucopyranosyl)tri-*n*-butylstannane (S2).** To a solution of (2-deoxy- $\beta$ -D-glucopyranosyl)tri-*n*-butylstannane (72.0 mg, 0.165 mmol) in THF (2.00 mL) was added KHMDS (1.50 mL, 0.750 mmol, 0.5 M in PhMe) under N<sub>2</sub> at room temperature. After stirring for 0.5 h, 4-methoxybenzyl chloride (0.660 mmol, 0.089 mL) was added. The resulted reaction mixture was stirred at r.t. for 8 h, quenched with water, and extracted with EtOAc (3 x 50.0 mL). The combined organic layer was dried over Na<sub>2</sub>SO<sub>4</sub>, concentrated, and was purified by short column on SiO<sub>2</sub> (Hexanes:EtOAc, 20:1) to afford **S2** (109 mg, 83%) as a white foam:  $[\alpha]_D^{23} = -1.16$  (c = 1.50, CHCl<sub>3</sub>); IR (ATR)  $\nu = 2955, 2929, 2854, 1614, 1517, 1465, 1361, 1305, 1253, 1176, 1097, 1041, 825$  cm<sup>-1</sup>; <sup>1</sup>H NMR (300 MHz, CDCl<sub>3</sub>)  $\delta$  7.33 - 7.27 (m, 3H), 7.24 (d, *J* = 2.1 Hz, 1H), 7.19 - 7.12 (m, 2H), 6.90 - 6.80 (m, 6H), 4.81 (d, *J* = 10.5 Hz, 1H), 4.67 - 4.59 (m, 2H), 4.59 - 4.52 (m, 2H), 4.47 (d, *J* = 11.8 Hz, 1H), 3.81 (s, 3H), 3.80 (s, 3H), 3.79 (s, 3H), 3.66 - 3.48

(m, 4H), 3.42 (t,  $J = 9.0$  Hz, 1H), 3.20 (dt,  $J = 9.4, 3.3$  Hz, 1H), 2.15 - 2.06 (m, 1H), 1.81 (td,  $J = 13.2, 10.5$  Hz, 1H), 1.50 (ddd,  $J = 6.7, 4.9, 3.4$  Hz, 6H), 1.36 - 1.25 (m, 6H), 1.02 - 0.80 (m, 15H);  $^{13}\text{C}$  NMR (75 MHz,  $\text{CDCl}_3$ )  $\delta$  159.3, 131.2, 129.8, 129.4, 129.2, 113.9 (2), 113.8, 83.3, 82.8, 79.1, 77.4, 74.8, 73.2, 71.4, 70.8, 69.9, 55.4, 55.4, 37.2, 29.3, 27.5, 13.9, 8.8; HRMS (ESI)  $m/z$  calcd for  $\text{C}_{42}\text{H}_{62}\text{O}_7\text{SnNa}$   $[\text{M} + \text{Na}]^+$  821.3425, found 821.3441.

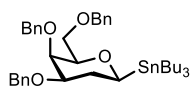

S3

**(3,4,6-Tri-*O*-benzyl-2-deoxy- $\beta$ -D-galactopyranosyl)tri-*n*-butylstannane (S3).** To a solution of *i*-Pr<sub>2</sub>NH (1.9 mL, 13.8 mmol) in anhydrous and degassed THF (13.8 mL) was added *n*-BuLi (5.34 mL, 13.3 mmol, 2.5 M in hexanes) at  $-78^\circ\text{C}$ . After stirring for 15 min, to the reaction mixture Bu<sub>3</sub>SnH (3.84 mL, 4.16 g, 14.3 mmol) was added and stirred for another 15 min, then allowed to warm up to  $0^\circ\text{C}$ . A solution of 3,4,6-tri-*O*-benzyl-2-deoxy- $\alpha$ -D-galactopyranosyl chloride (2.08 g, 4.60 mmol) in anhydrous THF (27.6 mL) was added at  $0^\circ\text{C}$ . After stirring at  $0^\circ\text{C}$  for 1.5 h, the reaction was quenched with H<sub>2</sub>O (50.0 mL) and extracted with EtOAc (3  $\times$  30.0 mL). The combined organic layers were dried over Na<sub>2</sub>SO<sub>4</sub>, concentrated, and purified by column chromatography on SiO<sub>2</sub> (Hexanes:EtOAc, 1:0 to 30:1) to afford **S3** (1.03 g, 31.1%) as a colorless oil:  $[\alpha]_D^{23} = -1.0$  ( $c = 38.1$ ,  $\text{CHCl}_3$ ); IR (ATR)  $\nu = 3033, 2959, 2925, 2854, 1499, 1458, 1361, 1208, 1100, 1030, 881, 735, 698, 601$   $\text{cm}^{-1}$ ;  $^1\text{H}$  NMR (300 MHz,  $\text{CDCl}_3$ )  $\delta$  7.41 - 7.27 (m, 15H), 5.03 (d,  $J = 11.8$  Hz, 1H), 4.69 - 4.63 (m, 3H), 4.55 - 4.45 (m, 2H), 3.95 - 3.92 (m, 1H), 3.80 - 3.70 (m, 1H), 3.64 - 3.51 (m, 3H), 3.44 - 3.39 (m, 1H), 2.50 - 2.38 (m, 1H), 1.86 - 1.80 (m, 1H), 1.64 - 1.50 (m, 6H), 1.39 - 1.32 (m, 6H), 0.98 - 0.89 (m, 15H);  $^{13}\text{C}$  NMR (75 MHz,  $\text{CDCl}_3$ )  $\delta$  139.7, 138.9, 138.5, 128.5, 128.4, 128.1, 127.9, 127.7, 127.6(2), 127.4, 127.2, 80.9, 80.3, 77.6, 76.7, 74.1, 73.9, 73.6, 71.7, 70.2, 70.0, 32.5, 29.2, 27.5, 13.8, 8.7; HRMS (ESI)  $m/z$  calcd for  $\text{C}_{39}\text{H}_{56}\text{O}_4\text{SnNa}$   $[\text{M} + \text{Na}]^+$  731.3107, found 731.3118.

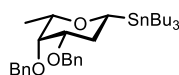

S4

**(2,3,4-Tri-*O*-benzyl- $\beta$ -L-fucopyranosyl)tri-*n*-butylstannane (S4).** To a solution of *i*-Pr<sub>2</sub>NH (1.56 mL, 11.13 mmol) in anhydrous THF (15.0 mL) was added *n*-BuLi (4.30 mL, 10.8 mmol, 2.5 M in hexane) at  $-78^\circ\text{C}$ . After stirring for 15 min, Bu<sub>3</sub>SnH (3.26 mL, 11.5 mmol) was added at  $-78^\circ\text{C}$ . The reaction mixture was stirred another 15 min, then warmed up to  $0^\circ\text{C}$ . To a solution of 3,4-di-*O*-benzyl-L-fucal (1.22 mg, 3.71 mmol) in  $\text{CHCl}_3/\text{PhMe}$  (2:1, 15.0 mL) was added SOCl<sub>2</sub> (0.5 mL). The resulting solution was stirred at room temperature for 0.5 h and concentrated under vacuum. The residue was dissolved in anhydrous THF and added dropwise to the above stannane mixture at  $0^\circ\text{C}$ . After stirring for 1.5 h, the reaction mixture was quenched with water (30.0 mL) and extracted with EtOAc (3  $\times$  20.0 mL). The combined organic layer was dried over Na<sub>2</sub>SO<sub>4</sub>, concentrated, and purified by column chromatography on SiO<sub>2</sub> (Hexanes:EtOAc, 25:1) to afford **S4** (320 mg, 14%) as a colorless oil:  $[\alpha]_D^{23} = +1.3$  ( $c = 2.55$ ,  $\text{CHCl}_3$ ); IR (ATR)  $\nu = 3033, 2959, 2925, 2854, 1499, 1458, 1380, 1361, 1212, 1182, 1111, 1059, 1033, 962, 843, 739, 702, 601$   $\text{cm}^{-1}$ ;  $^1\text{H}$  NMR (300 MHz,  $\text{CDCl}_3$ )  $\delta$  7.45 - 7.29 (m, 10H), 5.02 (d,  $J = 11.9$  Hz, 1H), 4.69 (d,  $J = 11.9$  Hz, 1H), 4.64 (d,  $J = 2.4$  Hz, 2H), 3.69 (dd,  $J = 13.2, 2.0$  Hz, 1H), 3.62 - 3.57 (m, 1H), 3.50 (ddd,  $J = 11.4, 4.6, 2.5$  Hz, 1H), 3.29 - 3.20 (m, 1H), 2.36 (td,  $J = 12.9, 11.4$  Hz, 1H), 1.82 - 1.72 (m, 1H), 1.56 - 1.48 (m, 6H), 1.36 - 1.28 (m, 6H), 1.15 (d,  $J = 6.4$  Hz, 3H), 0.91 (q,  $J = 7.1$  Hz, 15H);  $^{13}\text{C}$  NMR (75 MHz,  $\text{CDCl}_3$ )  $\delta$  139.8, 139.1, 128.5, 128.2, 127.8, 127.6, 127.4, 127.2, 81.0, 78.0, 76.9, 74.3, 71.5, 70.0, 32.1, 29.2, 27.5, 18.2, 13.9, 8.8; HRMS (ESI)  $m/z$  calcd for  $\text{C}_{32}\text{H}_{50}\text{O}_3\text{SnNa}$   $[\text{M} + \text{Na}]^+$  625.2686, found 625.2689.

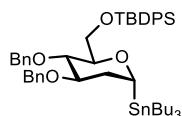

S5

**(3,4-Di-*O*-benzyl-6-(*tert*-butyldiphenylsilyl)-2-deoxy- $\alpha$ -D-glucopyranosyl)tri-*n*-butylstannane (S5).** To a solution of *i*-Pr<sub>2</sub>NH (1.45 mL, 10.3 mmol) in anhydrous THF (15.0 mL), *n*-BuLi (6.20 mL, 9.95 mmol, 1.6 M in hexane) was added at 0 °C. After stirring for 15 min, Bu<sub>3</sub>SnH (3.00 mL, 10.6 mmol) was added, and the reaction mixture was stirred at -78 °C for another 15 min. The solution of Bu<sub>3</sub>SnLi in THF was warmed up to 0 °C. To a solution of 3,4-di-*O*-benzyl-6-*O*-*tert*-butyldiphenylsilyl-2-deoxy-D-glucose (2.00 g, 3.43 mmol) in CHCl<sub>3</sub>/PhMe (2:1, 15.0 mL) was added SOCl<sub>2</sub> (1.80 mL, 24.8 mmol). The resulting solution was stirred at rt for 0.5 h and concentrated under vacuum. The residue was dissolved in THF (20.0 mL) and added dropwise via syringe to the above freshly prepared solution of Bu<sub>3</sub>SnLi (9.95 mmol) in THF (15.0 mL) at 0 °C. The resulted reaction mixture was stirred at 0 °C for 1.5 h, quenched with water, and extracted with EtOAc (3 x 50.0 mL). The combined organic layer was dried over Na<sub>2</sub>SO<sub>4</sub>, concentrated, and was purified by short column on SiO<sub>2</sub> (Hexanes:EtOAc, 20:1) to afford **S5** (879 mg, 33%) as a colorless oil:  $[\alpha]_D^{30} = +16.0$  (*c* = 6.95, CHCl<sub>3</sub>); IR (ATR)  $\nu = 3033, 2959, 2929, 2858, 1458, 1432, 1365, 1115, 1093, 1030, 870, 743, 702$  cm<sup>-1</sup>; <sup>1</sup>H NMR (300 MHz, CDCl<sub>3</sub>)  $\delta$  7.80 - 7.62 (m, 4H), 7.46 - 7.26 (m, 13H), 7.25 - 7.16 (m, 3H), 4.94 (d, *J* = 11.1 Hz, 1H), 4.76 - 4.49 (m, 4H), 3.88 (d, *J* = 3.2 Hz, 2H), 3.63 - 3.48 (m, 2H), 3.14 (dt, *J* = 7.7, 3.2 Hz, 1H), 2.28 - 2.08 (m, 2H), 1.55 - 1.34 (m, 6H), 1.33 - 1.20 (m, 6H), 1.05 (d, *J* = 3.7 Hz, 9H), 0.97 - 0.74 (m, 15H); <sup>13</sup>C NMR (75 MHz, CDCl<sub>3</sub>)  $\delta$  156.9, 139.0, 138.8, 136.0, 135.8, 134.0, 133.6, 129.6, 129.6, 128.6, 128.4, 127.9, 127.8, 127.7, 127.6, 127.5, 80.9, 80.6, 78.7, 74.9, 71.6, 71.5, 63.8, 36.4, 29.3, 27.5, 27.0, 19.4, 13.8, 10.1; HRMS (ESI) *m/z* calcd for C<sub>48</sub>H<sub>68</sub>O<sub>4</sub>SiSnNa [M + Na]<sup>+</sup> 879.3807, found 879.3813.

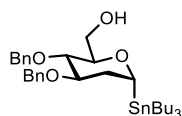

S6

**(3,4-Di-*O*-benzyl-2-deoxy- $\alpha$ -D-glucopyranosyl)tri-*n*-butylstannane (S6).** To a solution of the **S5** (800 mg, 0.936 mmol) in anhydrous THF (3.00 mL), TBAF solution (3.70 mL, 3.70 mmol, 1.00 M in THF) was added under N<sub>2</sub>. The reaction mixture was stirred at rt 12 h. The crude mixture purified by column chromatography on SiO<sub>2</sub> (Hexanes:EtOAc, 20:1) to obtain **S6** (450 mg, 78%) as a colorless oil:  $[\alpha]_D^{30} = +4.1$  (*c* = 18.9, CHCl<sub>3</sub>); IR (ATR)  $\nu = 3469, 3033, 2959, 2921, 2854, 1499, 1458, 1365, 1179, 1089, 1030, 966, 877, 739, 702$  cm<sup>-1</sup>; <sup>1</sup>H NMR (300 MHz, CDCl<sub>3</sub>)  $\delta$  7.41 - 7.27 (m, 10H), 4.95 (d, *J* = 11.3 Hz, 1H), 4.74 - 4.46 (m, 4H), 3.81 - 3.51 (m, 3H), 3.39 (t, *J* = 8.8 Hz, 1H), 3.08 (ddd, *J* = 9.1, 4.8, 3.1 Hz, 1H), 2.24 - 2.06 (m, 2H), 1.83 (m, 1H), 1.54 - 1.37 (m, 6H), 1.35 - 1.24 (m, 6H), 0.96 - 0.80 (m, 15H); <sup>13</sup>C NMR (75 MHz, CDCl<sub>3</sub>)  $\delta$  138.7, 138.6, 128.6, 128.5, 128.1, 127.8, 127.8, 80.6, 79.5, 79.0, 75.0, 71.9, 71.4, 62.9, 36.3, 29.3, 27.6, 13.8, 10.1; HRMS (ESI) *m/z* calcd for C<sub>32</sub>H<sub>50</sub>O<sub>4</sub>SnNa [M + Na]<sup>+</sup> 641.2635, found 641.2653.

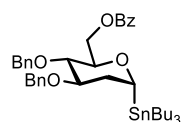

S7

**(3,4-Di-*O*-benzyl-6-*O*-benzoyl-2-deoxy- $\alpha$ -D-glucopyranosyl)tri-*n*-butylstannane (S7).** To a solution of (3,4-Di-*O*-benzyl-2-deoxy- $\alpha$ -D-glucopyranosyl)tri-*n*-butylstannane **S6** (224 mg, 0.36 mmol) in pyridine (3

ml), benzoyl chloride (0.085 ml, 0.73 mmol) was added. The reaction mixture was stirred at rt 12 h. After removal of solvents, the crude mixture was quenched with water, extracted with EtOAc (3 x 50.0 mL) and purified by column chromatography on SiO<sub>2</sub> (Hexanes:EtOAc, 20:1) to obtain **S7** (142 mg, 55%) as a colorless oil:  $[\alpha]_D^{29} = +4.2$  (c = 2.50, CHCl<sub>3</sub>); IR (ATR)  $\nu = 3067, 3033, 2959, 2925, 2973, 1726, 1458, 1275, 1182, 1097, 1074, 1030, 968, 739, 717, 702 \text{ cm}^{-1}$ ; <sup>1</sup>H NMR (300 MHz, CDCl<sub>3</sub>)  $\delta$  8.07 - 7.99 (m, 2H), 7.58 - 7.50 (m, 1H), 7.41 - 7.19 (m, 12H), 4.96 (d, *J* = 11.1 Hz, 1H), 4.77 - 4.46 (m, 6H), 3.70 - 3.58 (m, 1H), 3.54 - 3.35 (m, 2H), 2.31 - 2.11 (m, 2H), 1.54 - 1.38 (m, 6H), 1.34 - 1.17 (m, 6H), 1.07 - 0.62 (m, 15H); <sup>13</sup>C NMR (75 MHz, CDCl<sub>3</sub>)  $\delta$  166.6, 138.5, 138.4, 133.1, 129.9, 128.6, 128.5, 128.4, 128.2, 127.9 (2), 80.6, 78.5, 74.9, 71.5, 64.6, 36.1, 29.2, 27.6, 13.8, 10.1; HRMS (ESI) *m/z* calcd for C<sub>39</sub>H<sub>54</sub>O<sub>5</sub>SnNa [M + Na]<sup>+</sup> 745.2891, found 745.2899.

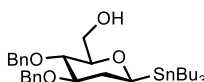

**S8**

**(3,4-Di-O-benzyl-2-deoxy- $\beta$ -D-glucopyranosyl)tri-*n*-butylstannane (S8).** To a solution of *i*-Pr<sub>2</sub>NH (1.45 mL, 10.3 mmol) in anhydrous THF (15.0 mL), *n*-BuLi (6.20 mL, 9.95 mmol, 1.6 M in hexane) was added at 0 °C. After stirring for 15 min, Bu<sub>3</sub>SnH (3.00 mL, 10.6 mmol) was added, and the reaction mixture was stirred at -78 °C for another 15 min. The solution of Bu<sub>3</sub>SnLi in THF was warmed up to 0 °C. To a solution of 3,4-di-*O*-benzyl-6-*O*-*tert*-butyldiphenylsilyl-2-deoxy-D-glucose (2.00 g, 3.43 mmol) in CHCl<sub>3</sub>/PhMe (2:1, 15.0 mL) was added SOCl<sub>2</sub> (1.80 mL, 24.8 mmol). The resulting solution was stirred at rt for 0.5 h and concentrated under vacuum. The residue was dissolved in THF (20.0 mL) and added dropwise via syringe to the above freshly prepared solution of Bu<sub>3</sub>SnLi (9.95 mmol) in THF (15.0 mL) at 0 °C. The resulted reaction mixture was stirred at 0 °C for 1.5 h, quenched with water, and extracted with EtOAc (3 x 50.0 mL). The combined organic layer was dried over Na<sub>2</sub>SO<sub>4</sub>, concentrated, and was purified by short column on SiO<sub>2</sub> (Hexanes:EtOAc, 30:1) to obtain the crude product (117 mg, 4.0%) as a colorless oil. To a solution of the above product (117 mg, 0.137 mmol) in anhydrous THF (3.00 mL), TBAF solution (0.40 mL, 4.0 mmol, 1.00 M in THF) was added under N<sub>2</sub>. After stirring at rt for 12 h, the reaction was quenched with H<sub>2</sub>O (50.0 mL) and extracted with EtOAc (3 x 30.0 mL). The combined organic layers were dried over Na<sub>2</sub>SO<sub>4</sub>, concentrated, and purified by column chromatography on SiO<sub>2</sub> (Hexanes:EtOAc, 1:0 to 20:1) to afford **S8** (84 mg, 98%) as a colorless oil:  $[\alpha]_D^{29} = -1.4$  (c = 4.60, CHCl<sub>3</sub>); IR (ATR)  $\nu = 3591, 3461, 3033, 3067, 2959, 2929, 2858, 1458, 1365, 1212, 1104, 1078, 1033, 870, 825, 739, 702 \text{ cm}^{-1}$ ; <sup>1</sup>H NMR (300 MHz, CDCl<sub>3</sub>)  $\delta$  7.40 - 7.30 (m, 10H), 4.95 (d, *J* = 11.0 Hz, 1H), 4.79 - 4.61 (m, 3H), 3.82 (dd, *J* = 11.4, 3.1 Hz, 1H), 3.72 - 3.53 (m, 3H), 3.40 (t, *J* = 9.1 Hz, 1H), 3.16 (ddd, *J* = 9.4, 5.1, 3.1 Hz, 1H), 2.15 (ddd, *J* = 13.1, 5.0, 2.0 Hz, 1H), 1.81 (td, *J* = 13.3, 10.7 Hz, 2H), 1.61 - 1.44 (m, 6H), 1.37 - 1.24 (m, 6H), 1.01 - 0.77 (m, 15H); <sup>13</sup>C NMR (75 MHz, CDCl<sub>3</sub>)  $\delta$  138.9, 138.6, 134.9, 129.8, 128.6, 128.2, 127.9, 127.8, 127.7, 82.7, 82.4, 79.5, 75.3, 71.7, 70.9, 63.1, 37.0, 29.3, 27.5, 13.8, 8.8; HRMS (ESI) *m/z* calcd for C<sub>32</sub>H<sub>50</sub>O<sub>4</sub>SnNa [M + Na]<sup>+</sup> 641.2635, found 641.2650.

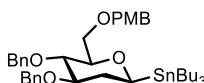

**S9**

**(3,4-Di-O-benzyl-6-(4-methoxybenzyl)-2-deoxy- $\beta$ -D-glucopyranosyl)tri-*n*-butylstannane (S9).** To a solution of (3,4-di-*O*-benzyl-2-deoxy- $\beta$ -D-glucopyranosyl)tri-*n*-butylstannane **S8** (124 mg, 0.2 mmol) in anhydrous THF (10.0 mL), KHMDS (0.60 mL, 0.300 mmol, 0.5 M in PhMe) was added under N<sub>2</sub> at rt. After stirring for 0.5 h, 4-methoxybenzyl chloride (0.400 mmol, 0.054 mL) was added to the reaction mixture and stirred 12 h. The crude mixture was purified by chromatographic purification on SiO<sub>2</sub> (Hexanes:EtOAc, 10:1)

to afford product **S9** (129.9 mg, 88%) as a light yellow oil:  $[\alpha]_D^{28} = -0.7$  ( $c = 3.95$ ,  $\text{CHCl}_3$ ); IR (ATR)  $\nu = 3033, 2955, 2925, 2854, 1614, 1518, 1458, 1365, 1305, 1249, 1179, 1104, 825, 739, 702 \text{ cm}^{-1}$ ;  $^1\text{H NMR}$  (300 MHz,  $\text{CDCl}_3$ )  $\delta$  7.41 - 7.20 (m, 13H), 6.92 - 6.80 (m, 2H), 4.91 (d,  $J = 10.9 \text{ Hz}$ , 1H), 4.75 - 4.44 (m, 5H), 3.79 (s, 3H), 3.71 - 3.42 (m, 5H), 3.23 (dt,  $J = 9.3, 3.2 \text{ Hz}$ , 1H), 2.13 (ddd,  $J = 13.2, 4.9, 2.0 \text{ Hz}$ , 1H), 1.84 (td,  $J = 13.2, 10.4 \text{ Hz}$ , 1H), 1.57 - 1.45 (m, 6H), 1.39 - 1.22 (m, 6H), 1.09 - 0.74 (m, 15H);  $^{13}\text{C NMR}$  (75 MHz,  $\text{CDCl}_3$ )  $\delta$  159.1, 139.0, 138.9, 131.1, 129.2, 128.5, 128.4, 128.1, 127.8, 127.7, 113.8, 83.3, 83.0, 79.4, 75.2, 73.2, 71.7, 70.8, 69.8, 55.4, 37.1, 29.2, 27.5, 13.9, 8.8; HRMS (ESI)  $m/z$  calcd for  $\text{C}_{40}\text{H}_{58}\text{O}_5\text{SnNa}$   $[\text{M} + \text{Na}]^+$  761.3213, found 761.3231.

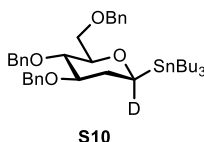

**(3,4,6-Tri-*O*-benzyl-2-deoxy- $\beta$ -D-(1-D)glucopyranosyl)tri-*n*-butylstannane (S10).** To a solution of *i*-Pr<sub>2</sub>NH (0.88 mL, 6.33 mmol) in anhydrous THF (15.0 mL) *n*-BuLi (2.5 mL, 6.12 mmol, 2.5 M in hexane) was added at  $-78 \text{ }^\circ\text{C}$ . The reaction mixture was stirred at  $-78 \text{ }^\circ\text{C}$  for 15 min followed by Bu<sub>3</sub>SnH (1.85 mL, 6.54 mmol) and stirred at  $-78 \text{ }^\circ\text{C}$  for another 15 min, then allowed to warm up to  $0 \text{ }^\circ\text{C}$ . A solution of 3,4,6-tri-*O*-benzyl-2-deoxy- $\alpha$ -D-glucopyranosyl chloride (920 mg, 2.11 mmol) in anhydrous THF (30.0 mL) was added at  $0 \text{ }^\circ\text{C}$ . After stirring at  $0 \text{ }^\circ\text{C}$  for 1.5 h, the reaction was quenched with H<sub>2</sub>O (30.0 mL) and extracted with EtOAc (3  $\times$  20.0 mL). The combined organic layers were dried over Na<sub>2</sub>SO<sub>4</sub>, concentrated, and purified by column chromatography on SiO<sub>2</sub> (Hexanes:EtOAc, 25:1) to afford **S10** (603 mg, 40%) as a colorless oil:  $[\alpha]_D^{23} = -1.0$  ( $c = 2.10$ ,  $\text{CHCl}_3$ ); IR (ATR)  $\nu = 3033, 2959, 2925, 2854, 1499, 1458, 1365, 1201, 1097, 873, 739, 702, 601 \text{ cm}^{-1}$ ;  $^1\text{H NMR}$  (300 MHz,  $\text{CDCl}_3$ )  $\delta$  7.38 - 7.26 (m, 15H), 4.92 (d,  $J = 10.9 \text{ Hz}$ , 1H), 4.76 - 4.59 (m, 4H), 4.55 (d,  $J = 12.3 \text{ Hz}$ , 1H), 3.71 (d,  $J = 3.3 \text{ Hz}$ , 2H), 3.62 - 3.45 (m, 2H), 3.24 (dt,  $J = 9.1, 3.2 \text{ Hz}$ , 1H), 2.20 - 2.04 (m, 1H), 1.84 (dd,  $J = 13.1, 10.3 \text{ Hz}$ , 1H), 1.57 - 1.48 (m, 6H), 1.37 - 1.25 (m, 6H), 1.02 - 0.83 (m, 15H);  $^{13}\text{C NMR}$  (75 MHz,  $\text{CDCl}_3$ )  $\delta$  139.1, 139.0, 138.9, 128.5, 128.5, 128.4, 128.2, 127.8, 127.7, 127.6, 127.4, 83.2, 83.0, 79.4, 77.4, 75.3, 73.5, 71.7, 70.2, 37.0, 29.3, 27.5, 13.9, 8.8; HRMS (ESI)  $m/z$  calcd for  $\text{C}_{39}\text{H}_{55}\text{DO}_4\text{SnNa}$   $[\text{M} + \text{Na}]^+$  732.3170, found 732.3180.

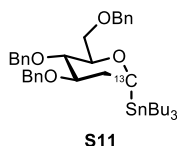

**(3,4,6-Tri-*O*-benzyl-2-deoxy- $\alpha$ -D-(1- $^{13}\text{C}$ )glucopyranosyl)tri-*n*-butylstannane (S11).** To a solution of *i*-Pr<sub>2</sub>NH (1.05 mL, 7.50 mmol) in anhydrous and degassed THF (7.50 mL), *n*-BuLi (4.50 mL, 11.25 mmol, 2.5 M in hexanes) was added dropwise at  $-78 \text{ }^\circ\text{C}$ . The reaction mixture was stirred at  $-78 \text{ }^\circ\text{C}$  for 15 min followed by Bu<sub>3</sub>SnH (2.09 mL, 2.26 g, 7.75 mmol) and stirred at  $-78 \text{ }^\circ\text{C}$  for another 15 min, then allowed to warm up to  $0 \text{ }^\circ\text{C}$ . A solution of 3,4,6-tri-*O*-benzyl-2-deoxy- $\alpha$ -D-(1- $^{13}\text{C}$ )glucopyranosyl chloride (1.13 g, 2.50 mmol) in anhydrous THF (15 mL) was added to the above stannane mixture at  $0 \text{ }^\circ\text{C}$ . After stirring at  $0 \text{ }^\circ\text{C}$  for 1.5 h, the reaction was quenched with H<sub>2</sub>O (30.0 mL) and extracted with EtOAc (3  $\times$  20.0 mL). The combined organic layers were dried over Na<sub>2</sub>SO<sub>4</sub>, concentrated, and purified by column chromatography on SiO<sub>2</sub> (Hexanes:EtOAc, 1:0 to 10:1) to afford **S11** (0.669 g, 38%) as a light yellow oil:  $[\alpha]_D^{24} = +5.3$  ( $c = 12.3$ ,  $\text{CHCl}_3$ ); IR (ATR)  $\nu = 3033, 2959, 2921, 2854, 1499, 1458, 1363, 1074, 1030, 881, 735, 698, 598 \text{ cm}^{-1}$ ;  $^1\text{H NMR}$  (300 MHz,  $\text{CDCl}_3$ )  $\delta$  7.45 - 7.20 (m, 15H), 4.93 (d,  $J = 11.1 \text{ Hz}$ , 1H), 4.75 - 4.45 (m, 5H), 3.81 - 3.45 (m, 4H), 3.22 - 3.16 (m, 1H), 2.23 - 2.19 (m, 2H), 1.60 - 1.42 (m, 6H), 1.37 - 1.25 (m, 6H), 1.00 - 0.70 (m, 15H);  $^{13}\text{C NMR}$  (75 MHz,  $\text{CDCl}_3$ )  $\delta$  139.0, 138.8, 138.4, 128.5, 128.4, 127.9, 127.8, 127.6, 80.8, 79.4, 78.9,

74.3, 74.2, 73.6, 72.0, 69.8, 69.7, 64.9, 29.2, 27.6, 13.8, 10.1; HRMS (ESI)  $m/z$  calcd for  $C_{38}^{13}CCH_5O_4SnNa$   $[M + Na]^+$  732.3133, found 732.3143.

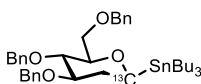

S12

**(3,4,6-Tri-*O*-benzyl-2-deoxy- $\beta$ -D-(1- $^{13}C$ )glucopyranosyl)tri-*n*-butylstannane (S12).** To a solution of *i*-Pr<sub>2</sub>NH (1.05 mL, 7.50 mmol) in anhydrous THF (7.50 mL) was added *n*-BuLi (2.90 mL, 7.25 mmol, 2.5 M in hexanes) by dropwise at -78 °C. After stirring at for 15 min, Bu<sub>3</sub>SnH (2.09 mL, 2.26 g, 7.75 mmol) was added at -78 °C. The reaction mixture was stirred for another 15 min, then allowed to warm up to 0 °C. A solution of 3,4,6-tri-*O*-benzyl-2-deoxy- $\alpha$ -D-(1- $^{13}C$ )glucopyranosyl chloride (1.13 g, 2.50 mmol) in anhydrous THF (15 mL) was added to the above stannane mixture at 0 °C. After stirring at 0 °C for 1.5 h, the reaction mixture was quenched with H<sub>2</sub>O (30.0 mL) and extracted with EtOAc (3 × 20.0 mL). The combined organic layers were dried over Na<sub>2</sub>SO<sub>4</sub>, concentrated, and purified by column chromatography on SiO<sub>2</sub> (Hexanes:EtOAc, 1:0 to 30:1) to afford **S12** (0.298 g, 17%) as a colorless oil:  $[\alpha]_D^{25} = -0.9$  (c = 4.70, CHCl<sub>3</sub>); IR (ATR)  $\nu = 3033, 2959, 2925, 2854, 1499, 1458, 1361, 1208, 1100, 1030, 881, 735, 698, 601$  cm<sup>-1</sup>; <sup>1</sup>H NMR (300 MHz, CDCl<sub>3</sub>)  $\delta$  7.43 - 7.27 (m, 15H), 4.94 (d,  $J = 10.8$  Hz, 1H), 4.81 - 4.44 (m, 5H), 3.75 - 3.73 (d,  $J = 3.2$  Hz, 2H), 3.68 (ddd,  $J = 137.2, 13.2, 1.7$  Hz, 1H), 3.63 - 3.48 (m, 2H), 3.33 - 3.18 (m, 1H), 2.19 - 2.13 (m, 1H), 1.98 - 1.82 (m, 1H), 1.70 - 1.46 (m, 6H), 1.47 - 1.32 (m, 6H), 1.12 - 0.75 (m, 16H); <sup>13</sup>C NMR (75 MHz, CDCl<sub>3</sub>)  $\delta$  139.0, 139.0, 138.9, 128.5, 128.4 (2), 128.1, 127.8, 127.7, 127.6, 127.4, 83.3-83.2 (d), 83.0 (d), 79.3, 75.2, 73.5-73.3 (m), 71.7, 70.8, 68.3 - 68.2 (m), 29.2, 27.5, 13.9, 8.8 - 8.7 (d); HRMS (ESI)  $m/z$  calcd for  $C_{38}^{13}CCH_5O_4SnNa$   $[M + Na]^+$  732.3133, found 732.3146.

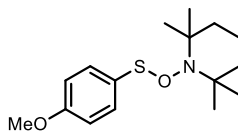

S13

**1-((4-Methoxyphenyl)thio)oxy)-2,2,6,6-tetramethylpiperidine (S13).** 1,2-Bis(4-methoxyphenyl)disulfane **18** (27.8 mg, 0.100 mmol) and 2,2,6,6-tetramethyl-1-piperidinyloxy (TEMPO) (31.3 mg, 0.200 mmol) were added to a one-dram vial with a screw-top septum, and the vial was then evacuated and refilled with N<sub>2</sub> (3x). Anhydrous dioxane (2.00 mL) were added and the reaction mixture was stirred at room temperature under 5W blue LED irradiation for 12 h and afforded after chromatographic purification on SiO<sub>2</sub> (Hexanes:EtOAc, 10:1) **S13** (14.5 mg, 49%) as a light yellow oil: <sup>1</sup>H NMR (300 MHz, CDCl<sub>3</sub>)  $\delta$  7.60 - 7.55 (m, 2H), 6.98 - 6.93 (m, 2H), 3.84 (s, 3H), 1.72 - 1.53 (m, 15H), 0.93 - 0.85 (m, 3H); <sup>13</sup>C NMR (75 MHz, CDCl<sub>3</sub>)  $\delta$  160.8, 141.6, 127.6, 114.1, 55.6, 43.7, 41.6, 35.5, 32.6, 28.9, 28.1, 17.4. Characterization data matched the literature report.<sup>7</sup>

## 6. Additional Mechanistic Experiments

### 6.1. ANOMERIZATION EXPERIMENTS WITH THIOGLYCOSIDES AND ANOMERIC STANNANES

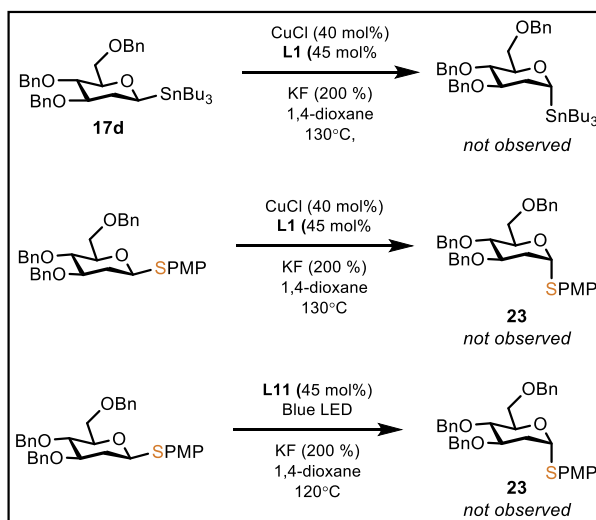

**Reaction conditions:** **22** (0.100 mmol, 1.0 equiv), **17d** (1.5 equiv), CuCl (40 mol%), **L1** (45 mol%) and 1,4-dioxane (2.0 mL) under N<sub>2</sub>, 120 or 130 °C, 24 h, blue LED or without blue LED, yield of isolated product. Anomeric selectivities determined by <sup>1</sup>H NMR analysis of unpurified reaction mixtures.

No change in anomeric purity was observed for anomeric stannanes and thioglycosides upon exposure to the optimized reaction conditions.

### 6.2. THIOGLYCOSYLATIONS WITH LATE TRANSITION METALS

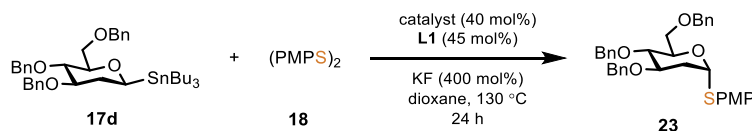

| Entry | Metal                                              | Light | Yield | α:β    |
|-------|----------------------------------------------------|-------|-------|--------|
| 1     | NiCl <sub>2</sub> (DME)                            | No    | 23%   | Only α |
| 2     | PdCl <sub>2</sub> (MeCN) <sub>2</sub>              | No    | 28%   | Only α |
| 3     | AuCl(PPh <sub>3</sub> ) <sub>3</sub>               | No    | 16%   | Only α |
| 4     | CoCl <sub>2</sub> (PPh <sub>3</sub> ) <sub>2</sub> | No    | N.D.  | N.A.   |
| 5     | NiCl <sub>2</sub> (DME)                            | Yes   | 18%   | Only α |
| 6     | PdCl <sub>2</sub> (MeCN) <sub>2</sub>              | Yes   | 16%   | Only α |
| 7     | AuCl(PPh <sub>3</sub> ) <sub>3</sub>               | Yes   | 45%   | Only α |
| 8     | CoCl <sub>2</sub> (PPh <sub>3</sub> ) <sub>2</sub> | Yes   | N.D.  | N.A.   |

**Reaction conditions:** **18** (0.100 mmol, 1.0 equiv), **17d** (1.5 equiv), Catalyst (40 mol%), **L1** (45 mol%) and 1,4-dioxane (2.0 mL) under N<sub>2</sub>, 130 °C, 24 h, blue LED or without blue LED, yield of isolated product. Anomeric selectivities determined by <sup>1</sup>H NMR analysis of unpurified reaction mixtures.



### 6.3. PROBING THE ROLE OF Cu(II) IN THERMAL AND PHOTOCHEMICAL THIOGLYCOSYLATIONS

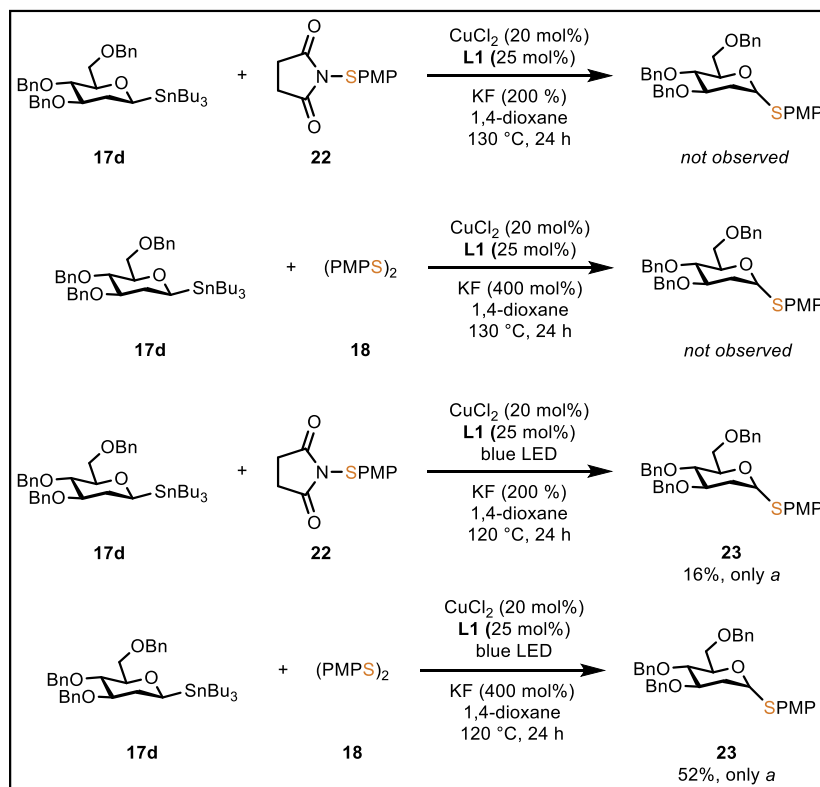

**General reaction conditions:** sulfur electrophile (0.100 mmol, 1.0 equiv), **17d** (1.5 equiv), CuCl<sub>2</sub> (20 - 40 mol%), L1 (25 - 45 mol%) and 1,4-dioxane (2.0 mL) under N<sub>2</sub>, blue LED or without blue LED, 130 °C, 24 h, yield of isolated product. Anomeric selectivities determined by <sup>1</sup>H NMR analysis of unpurified reaction mixtures.

### 6.4. RADICAL TRAPPING EXPERIMENTS

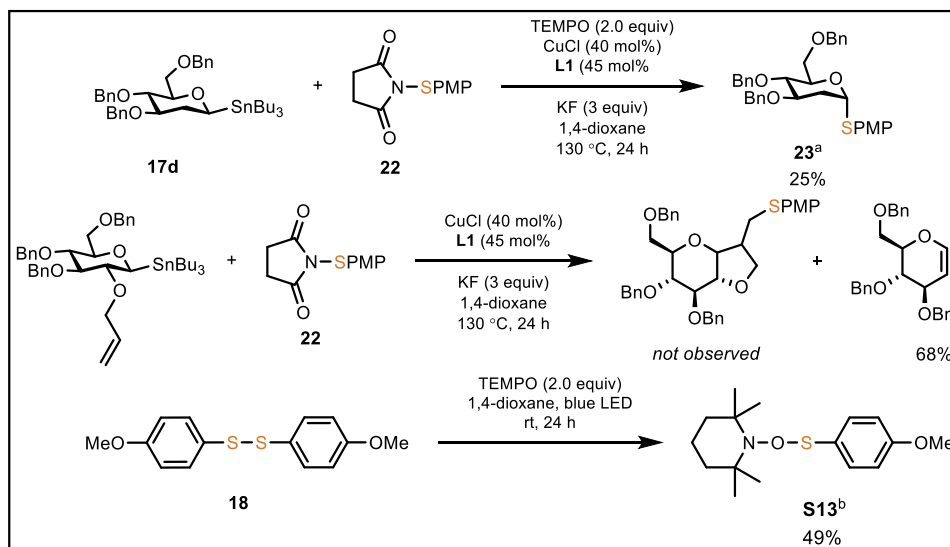

**General reaction conditions:** **22** (0.100 mmol, 1.0 equiv), stannanes (1.5 equiv), CuCl (40 mol%), L1 (45 mol%), KF (3 equiv), and 1,4-dioxane (2.0 mL) under N<sub>2</sub>, 130 °C, 24 h, yield of isolated product. Anomeric selectivities determined by <sup>1</sup>H NMR analysis of unpurified reaction mixtures. <sup>a</sup> (2,2,6,6-Tetramethylpiperidin-1-yl)oxyl (2 equiv) was used. <sup>b</sup> **18** (0.100 mmol, 1.0 equiv), (2,2,6,6-Tetramethylpiperidin-1-yl)oxyl (2 equiv), and 1,4-dioxane (2.0 mL) under N<sub>2</sub>, 23 °C, 24 h.

## 6.5. KINETIC ISOTOPE EFFECT EXPERIMENTS

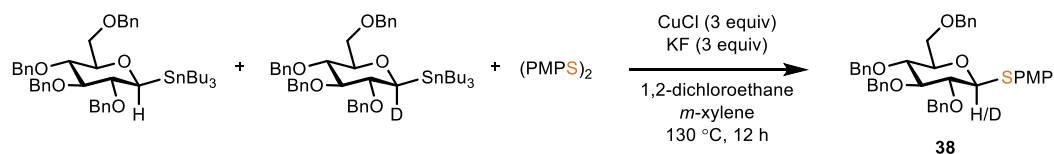

According to the general protocol A, (2,3,4,6-tri-*O*-benzyl-β-*D*)glucopyranosyl)tri-*n*-butylstannane<sup>1</sup> (81.4 mg, 0.100 mmol), (2,3,4,6-tri-*O*-benzyl-β-*D*-(1-*D*)glucopyranosyl)tri-*n*-butylstannane<sup>1</sup> (81.5 mg, 0.100 mmol), 1,2-bis(4-methoxyphenyl)disulfane **18** (83.4 mg, 0.300 mmol), KF (17.4 mg, 0.300 mmol), and CuCl (30.0 mg, 0.300 mmol) were added to anhydrous 1,2-dichloroethane and *m*-xylene (2:1, 3.00 mL). The reaction mixture was stirred under N<sub>2</sub> at 130 °C for 12 h. The KIE value represents the average of two separate runs. Based on the <sup>1</sup>H NMR results, an average KIE value of 1.03 was determined.

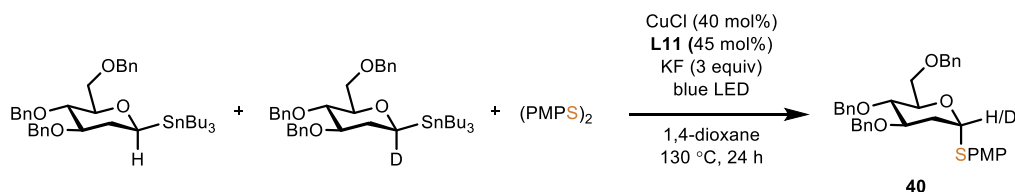

According to the general protocol C, (3,4,6-tri-*O*-benzyl-2-deoxy-β-*D*)glucopyranosyl)tri-*n*-butylstannane<sup>1</sup> (70.7 mg, 0.100 mmol), (3,4,6-tri-*O*-benzyl-2-deoxy-β-*D*-(1-*D*)glucopyranosyl)tri-*n*-butylstannane **S10** (70.8 mg, 0.100 mmol), 1,2-bis(4-methoxyphenyl)disulfane **18** (83.4 mg, 0.300 mmol), KF (17.4 mg, 0.300 mmol), 4,4'-di-*tert*-butyl-2,2'-dipyridyl (12.1 mg, 0.045 mmol), and CuCl (4.00 mg, 0.040 mmol) were added to anhydrous 1,4-dioxane (2.00 mL). The reaction mixture was stirred under N<sub>2</sub> at 130 °C for 24 h. The KIE value represents the average of two separate runs. Based on the <sup>1</sup>H NMR results, an average KIE value of 0.83 was determined.

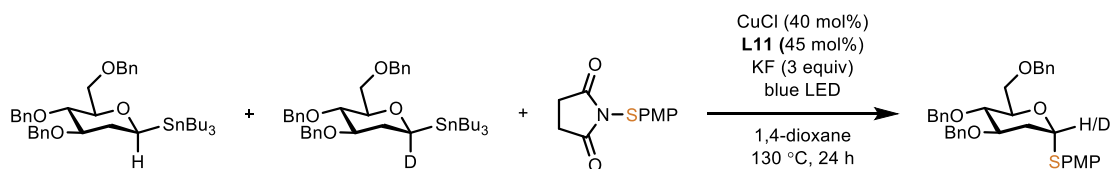

According to the general protocol C, (3,4,6-tri-*O*-benzyl-2-deoxy-β-*D*)glucopyranosyl)tri-*n*-butylstannane<sup>1</sup> (70.7 mg, 0.100 mmol), (3,4,6-tri-*O*-benzyl-2-deoxy-β-*D*-(1-*D*)glucopyranosyl)tri-*n*-butylstannane **S10** (70.8 mg, 0.100 mmol), 1-((4-methoxyphenyl)thio)pyrrolidine-2,5-dione **22** (71.1 mg, 0.300 mmol), KF (17.4 mg, 0.300 mmol), 4,4'-di-*tert*-butyl-2,2'-dipyridyl (12.1 mg, 0.045 mmol), and CuCl (4.00 mg, 0.040 mmol) were added to anhydrous 1,4-dioxane (2.00 mL). The reaction mixture was stirred under N<sub>2</sub> at 130 °C for 24 h. The KIE value represents the average of two separate runs. Based on the <sup>1</sup>H NMR results, an average KIE value of 0.90 was determined.

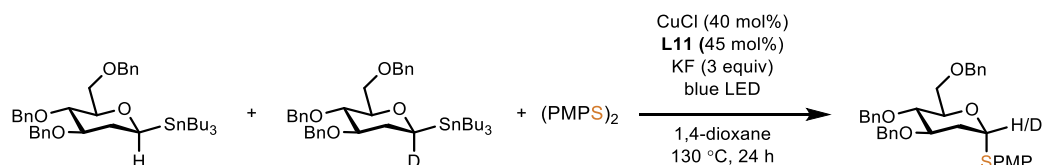

According to the general protocol C, (3,4,6-tri-*O*-benzyl-2-deoxy-β-*D*)glucopyranosyl)tri-*n*-butylstannane<sup>1</sup> (70.7 mg, 0.100 mmol), (3,4,6-tri-*O*-benzyl-2-deoxy-β-*D*-(1-*D*)glucopyranosyl)tri-*n*-butylstannane **S10** (70.8

mg, 0.100 mmol), 1,2-bis(4-methoxyphenyl)disulfane **18** (83.4 mg, 0.300 mmol), KF (17.4 mg, 0.300 mmol), 4,4'-di-*tert*-butyl-2,2'-dipyridyl (12.1 mg, 0.045 mmol), and CuCl (4.00 mg, 0.040 mmol) were added to anhydrous 1,4-dioxane (2.00 mL). The reaction mixture was stirred at 120 °C under 5W blue LED irradiation for 24 h. The KIE value represents the average of two separate runs. Based on the <sup>1</sup>H NMR results, an average KIE value of 0.92 was determined.

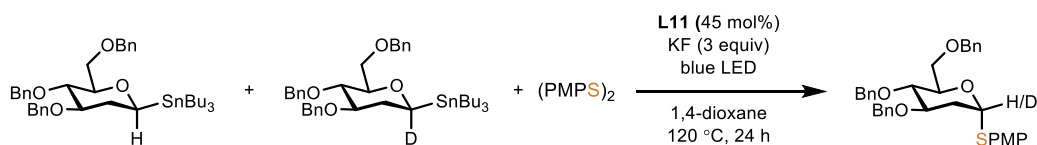

According to the general protocol C, (3,4,6-tri-*O*-benzyl-2-deoxy-β-D)glucopyranosyl)tri-*n*-butylstannane<sup>1</sup> (70.7 mg, 0.100 mmol), (3,4,6-tri-*O*-benzyl-2-deoxy-β-D-(1-D)glucopyranosyl)tri-*n*-butylstannane **S10** (70.8 mg, 0.100 mmol), 1,2-bis(4-methoxyphenyl)disulfane **18** (83.4 mg, 0.300 mmol), KF (17.4 mg, 0.300 mmol), 2,4,4'-di-*tert*-butyl-2,2'-dipyridyl (12.1 mg, 0.045 mmol), and CuCl (4.00 mg, 0.040 mmol) were added to anhydrous 1,4-dioxane (2.00 mL). The reaction mixture was stirred at 120 °C under 5W blue LED irradiation for 24 h. The KIE value represents the average of two separate runs. Based on the <sup>1</sup>H NMR results, an average KIE value of 0.74 was determined.

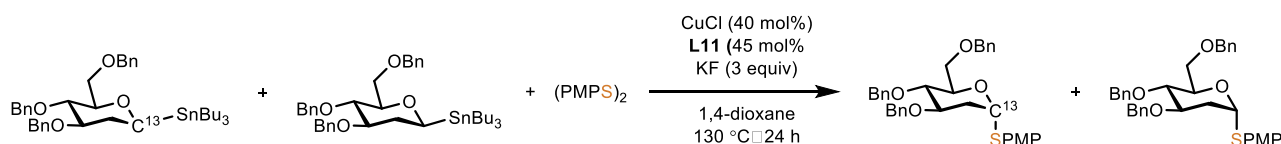

According to the general protocol B, (3,4,6-tri-*O*-benzyl-2-deoxy-β-D-glucopyranosyl)tri-*n*-butylstannane<sup>1</sup> (70.7 mg, 0.100 mmol), (3,4,6-tri-*O*-benzyl-2-deoxy-β-D-(1-<sup>13</sup>C)glucopyranosyl)tri-*n*-butylstannane **S11** (70.8 mg, 0.100 mmol), 1,2-bis(4-methoxyphenyl)disulfane **18** (83.4 mg, 0.300 mmol), KF (17.4 mg, 0.300 mmol), 2,2':6',2''-terpyridine (18.7 mg, 0.045 mmol), and CuCl (4.00 mg, 0.040 mmol) were added to anhydrous 1,4-dioxane (2.00 mL). The reaction mixture was stirred under N<sub>2</sub> at 130 °C for 12 h. The KIE value represents the average of two separate runs. Based on the <sup>1</sup>H NMR results, an average KIE value of 1.031 was determined.

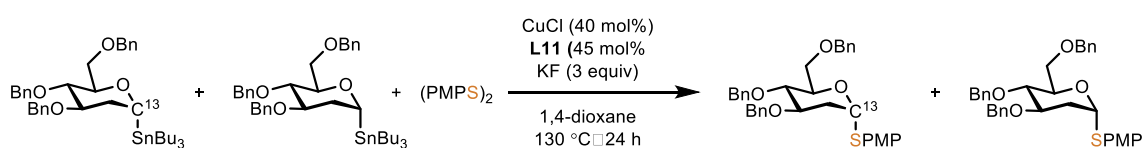

According to the general protocol B, (3,4,6-tri-*O*-benzyl-2-deoxy-α-D-glucopyranosyl)tri-*n*-butylstannane<sup>1</sup> (70.7 mg, 0.100 mmol), (3,4,6-tri-*O*-benzyl-2-deoxy-α-D-(1-<sup>13</sup>C)glucopyranosyl)tri-*n*-butylstannane **S12** (70.8 mg, 0.100 mmol), 1,2-bis(4-methoxyphenyl)disulfane **18** (83.4 mg, 0.300 mmol), KF (17.4 mg, 0.300 mmol), 2,2':6',2''-terpyridine (18.7 mg, 0.045 mmol), and CuCl (4.00 mg, 0.040 mmol) were added to anhydrous 1,4-dioxane (2.00 mL). The reaction mixture was stirred under N<sub>2</sub> at 130 °C for 12 h. The KIE value represents the average of two separate runs. Based on the <sup>1</sup>H NMR results, an average KIE value of 1.033 was determined.

## 6.6. NMR ANALYSIS OF DISULFIDE-BIPYRIDINE MIXTURES

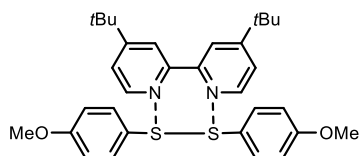

| Ratio of 2,2'-bipyridine to <b>18</b> | <sup>1</sup> H NMR shift of MeO in disulfide* |
|---------------------------------------|-----------------------------------------------|
| 0                                     | 3.8238                                        |
| 25:1                                  | 3.8181                                        |
| 50:1                                  | 3.8123                                        |
| 75:1                                  | 3.8069                                        |
| 100:1                                 | 3.8008                                        |
| 200:1                                 | 3.7778                                        |
| 300:1                                 | 3.7520                                        |
| 400:1                                 | 3.7265                                        |
| 500:1                                 | 3.7046                                        |
| 750:1                                 | 3.6500                                        |
| 1000:1                                | 3.5929                                        |

\*300 MHz NMR, CDCl<sub>3</sub>, 23 °C

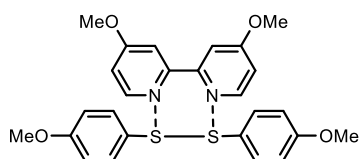

| Ratio of 2,2'-bipyridine to <b>18</b> | <sup>1</sup> H NMR shift of MeO in disulfide |
|---------------------------------------|----------------------------------------------|
| 0                                     | 3.8238                                       |
| 25:1                                  | 3.8165                                       |
| 50:1                                  | 3.8096                                       |
| 75:1                                  | 3.8015                                       |
| 100:1                                 | 3.7941                                       |

\*300 MHz NMR, CDCl<sub>3</sub>, 23 °C

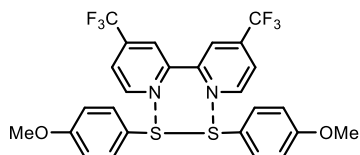

| Ratio of 2,2'-bipyridine to <b>18</b> | <sup>1</sup> H NMR shift of MeO in disulfide |
|---------------------------------------|----------------------------------------------|
| 0                                     | 3.8238                                       |
| 25:1                                  | 3.8220                                       |
| 50:1                                  | 3.8196                                       |
| 75:1                                  | 3.8169                                       |

\*300 MHz NMR, CDCl<sub>3</sub>, 23 °C

## 6.7. UV-VIS ABSORPTION SPECTRA

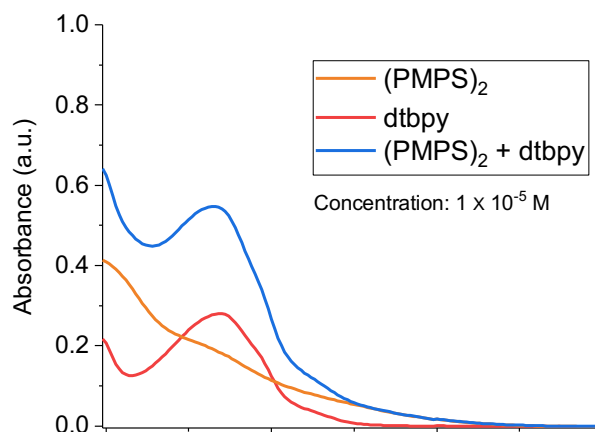

Solutions in  $\text{CHCl}_3$ , 23 °C

## 7. Computational Details

All DFT calculations were performed with the Gaussian 16 software package.<sup>7</sup> Geometry optimizations of all the minima and transition states were carried out at the B3LYP<sup>8</sup> level of theory with additional Grimme's D3 dispersion correction (Becke-Johnson damping)<sup>9</sup> using the def2-SVP basis set.<sup>10</sup> Vibrational frequencies were computed at the same level to evaluate its zero-point vibrational energy (ZPVE) and thermal corrections at 298 K, as well as to check whether each optimized structure is a transition state or not. The single-point energies were computed at the same level of theory, combined with def2-TZVPP basis set and SMD solvation model<sup>11</sup> for 1,4-dioxane using the optimized structures. The 3D diagrams of molecules were generated using CYLView.<sup>12</sup> In addition, to correct the Gibbs free energies under pressure of 1 atm to the standard state in solution (1 mol/L), a correction of  $RT\ln(c_s/c_g)$  (about 1.89 kcal/mol) is added to energies of all species.  $c_s$  is the standard molar concentration in solution (1 mol/L),  $c_g$  is the standard molar concentration in gas phase (0.0446 mol/L), and  $R$  is the gas constant.

**Table S1.** Zero-point correction (*ZPE*), thermal correction to enthalpy (*TCH*), thermal correction to Gibbs free energy (*TCG*), energies (*E*), enthalpies (*H*), and Gibbs free energies (*G*) (in Hartree) of the structures for all the figures calculated at the B3LYP-D3(BJ)/def2-TZVPP-SMD(1,4-dioxane)//B3LYP-D3(BJ)/def2-SVP level of theory.\*

| Structures            | ZPE      | TCH      | TCG      | E            | H            | G            | Imaginary Frequency |
|-----------------------|----------|----------|----------|--------------|--------------|--------------|---------------------|
| int1 (doublet)        | 0.402938 | 0.432857 | 0.338549 | -3373.739683 | -3373.306826 | -3373.401134 |                     |
| int2 (doublet)        | 0.257714 | 0.273516 | 0.214856 | -654.293904  | -654.020388  | -654.079048  |                     |
| TS3 (triplet)         | 0.661809 | 0.706908 | 0.581810 | -4028.045108 | -4027.338200 | -4027.463298 | 283.9i              |
| int4 (CSS)            | 0.309719 | 0.332599 | 0.256694 | -2743.737570 | -2743.404971 | -2743.480876 |                     |
| P <sub>Ax</sub> (CSS) | 0.353818 | 0.375738 | 0.302092 | -1284.348409 | -1283.972671 | -1284.046317 |                     |

|                               |          |          |          |              |              |              |                |
|-------------------------------|----------|----------|----------|--------------|--------------|--------------|----------------|
| <b>TS5</b> ( <i>triplet</i> ) | 0.662605 | 0.708128 | 0.579847 | -4028.051988 | -4027.343860 | -4027.472141 | 24.0 <i>i</i>  |
| <b>int6</b> (CSS)             | 0.665717 | 0.710865 | 0.586529 | -4028.063258 | -4027.352393 | -4027.476729 |                |
| <b>TS7</b> (CSS)              | 0.663411 | 0.708761 | 0.582261 | -4028.043643 | -4027.334882 | -4027.461382 | 73.3 <i>i</i>  |
| <b>TS8</b> ( <i>triplet</i> ) | 0.660577 | 0.706156 | 0.577217 | -4028.027753 | -4027.321597 | -4027.450536 | 385.8 <i>i</i> |
| <b>P<sub>Eq</sub></b> (CSS)   | 0.353496 | 0.375504 | 0.301627 | -1284.346847 | -1283.971343 | -1284.045220 |                |
| <b>TS9</b> ( <i>triplet</i> ) | 0.662364 | 0.707645 | 0.579510 | -4028.022330 | -4027.314685 | -4027.442820 | 45.6 <i>i</i>  |
| <b>int10</b> (CSS)            | 0.665186 | 0.710433 | 0.584677 | -4028.055108 | -4027.344675 | -4027.470431 |                |
| <b>TS11</b> (CSS)             | 0.663781 | 0.709101 | 0.581988 | -4028.048124 | -4027.339023 | -4027.466136 | 162.9 <i>i</i> |

---

\* Only the most stable spin states are listed here. CSS = closed-shell singlet.

## Coordinates

int1 (doublet)

|    |             |             |             |
|----|-------------|-------------|-------------|
| Cu | -0.14851400 | 1.71160700  | 2.29728000  |
| S  | 2.10799700  | 1.42559000  | 2.41293900  |
| C  | 2.58126200  | 1.98454000  | 0.80241300  |
| C  | 3.38921100  | 3.12836400  | 0.64889300  |
| C  | 2.14456900  | 1.31098700  | -0.35638000 |
| C  | 3.73695000  | 3.59101600  | -0.62110500 |
| H  | 3.72514500  | 3.65582600  | 1.54412600  |
| C  | 2.49181400  | 1.77887300  | -1.62430500 |
| H  | 1.49262700  | 0.44350300  | -0.25095600 |
| C  | 3.28886000  | 2.92031300  | -1.76497900 |
| H  | 4.35983600  | 4.48433600  | -0.71973100 |
| H  | 2.12550300  | 1.25172800  | -2.50879600 |
| H  | 3.55948100  | 3.28488100  | -2.75907700 |
| N  | -1.92345900 | 1.21404800  | 1.57273900  |
| C  | -2.07350600 | 1.05502600  | 0.22131600  |
| C  | -3.11239000 | 1.08908300  | 2.24577800  |
| C  | -3.53790000 | 0.73744200  | -0.11017800 |
| O  | -1.17756000 | 1.16090300  | -0.60402700 |
| C  | -4.23258800 | 0.73850700  | 1.25181500  |
| O  | -3.27788700 | 1.23199300  | 3.44665500  |
| H  | -3.58364000 | -0.22566000 | -0.64148600 |
| H  | -3.91524800 | 1.50211900  | -0.80691400 |
| H  | -4.66296200 | -0.23457900 | 1.53579300  |
| H  | -5.03888400 | 1.48175200  | 1.34811600  |
| N  | -0.69446200 | 3.03995000  | 3.93223800  |
| C  | -0.78079300 | 4.33905200  | 3.66822800  |
| C  | -1.05260000 | 2.51118500  | 5.09787700  |
| C  | -1.25026100 | 5.22984900  | 4.64554800  |
| C  | -0.38240700 | 4.71798000  | 2.28180600  |
| C  | -1.53347100 | 3.33359600  | 6.12606400  |
| C  | -1.62637200 | 4.70579500  | 5.88402300  |
| C  | -0.26612400 | 6.04693300  | 1.85947900  |
| N  | -0.15752800 | 3.69714000  | 1.43004400  |
| H  | -1.83565300 | 2.92330200  | 7.08921200  |
| H  | -2.00223300 | 5.37113100  | 6.66427500  |
| C  | 0.07749800  | 6.30957500  | 0.53203000  |
| C  | 0.14430400  | 3.94128900  | 0.15404800  |
| H  | 0.18301200  | 7.34056200  | 0.18668700  |
| C  | 0.27734900  | 5.24166000  | -0.34010800 |
| H  | 0.26612400  | 3.06521400  | -0.48450700 |
| H  | 0.53941300  | 5.39683400  | -1.38735800 |
| H  | -0.43343500 | 6.86670100  | 2.55826500  |
| H  | -1.33844600 | 6.29818300  | 4.44879300  |

|   |             |             |            |
|---|-------------|-------------|------------|
| C | -0.88242400 | 1.03352900  | 5.18735300 |
| C | -1.20823000 | 0.28943700  | 6.32658400 |
| C | -0.16230600 | -0.87390300 | 4.08169500 |
| C | -1.00445800 | -1.09047300 | 6.31364400 |
| H | -1.62159100 | 0.77581000  | 7.20994100 |
| C | -0.46908200 | -1.68999400 | 5.17320000 |
| H | 0.27819100  | -1.27650300 | 3.16454200 |
| H | -1.26001100 | -1.69075000 | 7.18972400 |
| H | -0.28855600 | -2.76514900 | 5.12529300 |
| N | -0.37260800 | 0.43819900  | 4.09670300 |

**int2** (*doublet*)

|   |             |             |             |
|---|-------------|-------------|-------------|
| C | -0.02842900 | -2.23280300 | 0.22050300  |
| C | 0.30903400  | -1.38447700 | 1.40480400  |
| O | 0.15597300  | -1.71512400 | -1.02553900 |
| H | 0.13479200  | -3.31357700 | 0.24048400  |
| C | -0.20085600 | 0.04425700  | 1.22443000  |
| H | 1.40902200  | -1.32012100 | 1.55533600  |
| C | -0.28995600 | -0.37847900 | -1.24894100 |
| C | 0.22174800  | 0.56515800  | -0.14919800 |
| O | 0.31142200  | 0.87325500  | 2.25098300  |
| H | -1.30639100 | 0.04565200  | 1.24943800  |
| C | 0.17098800  | 0.03920500  | -2.62862300 |
| H | -1.39564700 | -0.36129300 | -1.23418900 |
| O | -0.30285300 | 1.85851600  | -0.37799000 |
| H | 1.32805800  | 0.58261500  | -0.18517300 |
| C | -0.63749900 | 1.70396200  | 2.87610400  |
| O | -0.56342800 | -0.66056800 | -3.59628800 |
| H | 1.25732700  | -0.17097400 | -2.72123400 |
| H | 0.02230800  | 1.13202600  | -2.72958500 |
| C | 0.62693400  | 2.90996100  | -0.24976500 |
| H | -1.43038100 | 1.11577100  | 3.37858700  |
| H | -1.12023400 | 2.39533100  | 2.16219800  |
| H | -0.10765700 | 2.29260500  | 3.63961100  |
| C | -0.16755100 | -0.37617100 | -4.90830700 |
| H | 0.07803400  | 3.85227100  | -0.39207700 |
| H | 1.10432000  | 2.91625400  | 0.74518700  |
| H | 1.42131500  | 2.84829200  | -1.01945000 |
| H | -0.80639000 | -0.95844700 | -5.58811000 |
| H | 0.89033400  | -0.65512500 | -5.09291500 |
| H | -0.27979800 | 0.70060100  | -5.15356500 |
| H | -0.10348700 | -1.82433500 | 2.32652800  |

**TS3** (*triplet*)

|    |             |            |            |
|----|-------------|------------|------------|
| Cu | -0.31242900 | 2.11887600 | 2.73299500 |
|----|-------------|------------|------------|



|   |             |             |             |
|---|-------------|-------------|-------------|
| S | 1.99535700  | 1.35762300  | 2.47070200  |
| C | 2.58047000  | 2.24935600  | 1.05293500  |
| C | 3.20542400  | 3.50622100  | 1.18173700  |
| C | 2.41975800  | 1.70467700  | -0.23563000 |
| C | 3.66587400  | 4.18379600  | 0.05110700  |
| H | 3.32611500  | 3.95510300  | 2.16720700  |
| C | 2.88357200  | 2.39066400  | -1.36058600 |
| H | 1.89524300  | 0.75500300  | -0.34351800 |
| C | 3.51397800  | 3.63138100  | -1.22507500 |
| H | 4.14732200  | 5.15844900  | 0.17175100  |
| H | 2.74494100  | 1.95068500  | -2.35201600 |
| H | 3.87774400  | 4.16598500  | -2.10641700 |
| N | -1.72636000 | 1.08746500  | 1.76295800  |
| C | -1.65414000 | 0.57595500  | 0.49436300  |
| C | -2.92214000 | 0.78128100  | 2.37490000  |
| C | -2.90357900 | -0.26602400 | 0.19722100  |
| O | -0.74752600 | 0.75902900  | -0.30446700 |
| C | -3.78131700 | -0.07637000 | 1.43298300  |
| O | -3.25852600 | 1.12975900  | 3.49246300  |
| H | -2.58891900 | -1.30859000 | 0.03150300  |
| H | -3.35455300 | 0.08256200  | -0.74402900 |
| H | -4.05345800 | -1.00950300 | 1.94961000  |
| H | -4.72131400 | 0.46071900  | 1.23189400  |
| N | -0.32070500 | 3.59652800  | 4.11896700  |
| C | -0.15276100 | 4.85563300  | 3.69353900  |
| C | -0.47513500 | 3.26719900  | 5.41090200  |
| C | -0.15866600 | 5.90467600  | 4.61549200  |
| C | 0.03352400  | 4.95256600  | 2.23323400  |
| C | -0.49350700 | 4.27079900  | 6.38242000  |
| C | -0.33751600 | 5.59845500  | 5.97023900  |
| C | 0.37236300  | 6.12914500  | 1.55870000  |
| N | -0.13805300 | 3.78852400  | 1.55588200  |
| H | -0.61119200 | 4.02862500  | 7.43777900  |
| H | -0.34913700 | 6.40075500  | 6.71053200  |
| C | 0.52839100  | 6.09608800  | 0.17419300  |
| C | 0.00492200  | 3.75084800  | 0.22572900  |
| H | 0.80597400  | 7.00211100  | -0.36872400 |
| C | 0.33718500  | 4.89068900  | -0.50444800 |
| H | -0.14485600 | 2.77341600  | -0.24103500 |
| H | 0.46323400  | 4.81790600  | -1.58447900 |
| H | 0.52345700  | 7.05397000  | 2.11566400  |
| H | -0.02611400 | 6.93689300  | 4.29272600  |
| C | -0.55985300 | 1.81451700  | 5.62985000  |
| C | -0.65799900 | 1.20292700  | 6.88597900  |
| C | -0.54512900 | -0.26609600 | 4.57146600  |

|   |             |             |            |
|---|-------------|-------------|------------|
| C | -0.70920200 | -0.18441200 | 6.96389200 |
| H | -0.68564900 | 1.81108300  | 7.78916700 |
| C | -0.65687400 | -0.93938700 | 5.78435800 |
| H | -0.49087700 | -0.79248900 | 3.61551400 |
| H | -0.78467400 | -0.67742100 | 7.93526000 |
| H | -0.70068900 | -2.02921300 | 5.80347600 |
| N | -0.49469000 | 1.06412800  | 4.50296400 |
| C | 4.37402000  | 1.71071700  | 3.81554500 |
| C | 4.26315500  | 0.67532800  | 4.87945700 |
| O | 4.29085800  | 3.01357200  | 4.18514900 |
| H | 5.00964700  | 1.56129100  | 2.94171300 |
| C | 3.14267100  | 0.99632900  | 5.88076400 |
| H | 5.20642200  | 0.60209300  | 5.46642900 |
| C | 3.19778800  | 3.34628300  | 5.03571700 |
| C | 3.21695200  | 2.46751200  | 6.29505900 |
| O | 3.22473900  | 0.21157000  | 7.05617600 |
| H | 2.16431500  | 0.83703700  | 5.39138200 |
| C | 3.28788600  | 4.82743200  | 5.32208300 |
| H | 2.26706400  | 3.14141600  | 4.47909700 |
| O | 2.12594400  | 2.85892600  | 7.10350300 |
| H | 4.16915900  | 2.63119400  | 6.83945800 |
| C | 2.97081100  | -1.15868400 | 6.87340200 |
| O | 2.94516600  | 5.52892600  | 4.14824500 |
| H | 4.32208600  | 5.07433100  | 5.63663100 |
| H | 2.59894800  | 5.08268900  | 6.14724500 |
| C | 2.27868600  | 2.67081800  | 8.49138700 |
| H | 3.77758600  | -1.66837800 | 6.31452500 |
| H | 2.01901400  | -1.32766200 | 6.33631600 |
| H | 2.90044100  | -1.61755600 | 7.87065400 |
| C | 3.17992400  | 6.90549700  | 4.22530700 |
| H | 1.41122400  | 3.14154800  | 8.97959000 |
| H | 2.32276500  | 1.60446300  | 8.75974800 |
| H | 3.19646500  | 3.16460900  | 8.86580800 |
| H | 2.88575000  | 7.35050400  | 3.26344700 |
| H | 4.24929500  | 7.13334600  | 4.40606000 |
| H | 2.58978600  | 7.38323500  | 5.03445400 |
| H | 4.09768600  | -0.30440400 | 4.40696200 |

#### int4 (CSS)

|    |             |             |             |
|----|-------------|-------------|-------------|
| Cu | -0.52341300 | 2.03335900  | 3.04072000  |
| N  | -1.33299600 | 1.10101600  | 1.52815700  |
| C  | -1.23243600 | -0.23615100 | 1.25149000  |
| C  | -2.08199400 | 1.76115300  | 0.57998300  |
| C  | -1.99453200 | -0.57138200 | -0.03946300 |
| O  | -0.63143100 | -1.06781600 | 1.91858000  |

|   |             |             |             |
|---|-------------|-------------|-------------|
| C | -2.56405300 | 0.77110800  | -0.49226200 |
| O | -2.32609300 | 2.95598600  | 0.57311000  |
| H | -2.75775300 | -1.33144400 | 0.18950300  |
| H | -1.29588600 | -1.03151500 | -0.75549000 |
| H | -3.66375700 | 0.80335100  | -0.53535700 |
| H | -2.19945700 | 1.10821500  | -1.47527900 |
| N | -0.47678300 | 3.46274900  | 4.51293900  |
| C | -0.15303800 | 4.72561500  | 4.18769600  |
| C | -0.52035300 | 3.06564200  | 5.79559000  |
| C | 0.04739000  | 5.69427900  | 5.17820600  |
| C | 0.01278700  | 4.95439800  | 2.73393700  |
| C | -0.32578700 | 3.98009300  | 6.83805200  |
| C | -0.05570100 | 5.31248700  | 6.51800300  |
| C | -0.14967100 | 6.20347500  | 2.12214700  |
| N | 0.33223400  | 3.84914000  | 2.03090500  |
| H | -0.35621300 | 3.65423600  | 7.87817600  |
| H | 0.11152300  | 6.04384900  | 7.31152000  |
| C | 0.02732300  | 6.30094200  | 0.74252500  |
| C | 0.48260900  | 3.94609400  | 0.70921800  |
| H | -0.10462500 | 7.25933200  | 0.23552500  |
| C | 0.35364100  | 5.15134100  | 0.02007600  |
| H | 0.71309400  | 3.01515000  | 0.18397800  |
| H | 0.49209000  | 5.18161900  | -1.06195800 |
| H | -0.43711500 | 7.07584600  | 2.71092600  |
| H | 0.31079000  | 6.71762100  | 4.90835100  |
| C | -0.73616300 | 1.61035200  | 5.97373800  |
| C | -1.17462300 | 1.03178000  | 7.17177600  |
| C | -0.61846000 | -0.46489300 | 4.93443400  |
| C | -1.31980800 | -0.35372400 | 7.23382900  |
| H | -1.41699300 | 1.65526600  | 8.03341800  |
| C | -1.03463400 | -1.11593600 | 6.09818500  |
| H | -0.42162700 | -0.99431900 | 3.99556100  |
| H | -1.66310800 | -0.83046200 | 8.15487000  |
| H | -1.13666700 | -2.20269600 | 6.10480200  |
| N | -0.46511500 | 0.86425200  | 4.88097100  |

**P<sub>Ax</sub> (CSS)**

|   |             |             |             |
|---|-------------|-------------|-------------|
| C | 0.09443800  | -1.98186300 | 1.16471100  |
| C | 0.52561300  | -0.74791100 | 1.95697000  |
| O | 0.36082800  | -1.81203800 | -0.19860800 |
| H | 0.66362700  | -2.86935700 | 1.47091500  |
| C | -0.06255000 | 0.54182400  | 1.37073700  |
| H | 1.62385800  | -0.67347500 | 1.89776000  |
| C | -0.26600500 | -0.68938000 | -0.80366900 |
| C | 0.19332100  | 0.61592500  | -0.13671600 |

|   |             |             |             |
|---|-------------|-------------|-------------|
| O | 0.50420600  | 1.68968600  | 1.97318400  |
| H | -1.16143400 | 0.55508800  | 1.50858200  |
| C | 0.04501800  | -0.74181500 | -2.28280400 |
| H | -1.36127800 | -0.76793200 | -0.68161500 |
| O | -0.52619300 | 1.66919400  | -0.73688100 |
| H | 1.28280100  | 0.74241200  | -0.29824000 |
| C | -0.03656900 | 2.03009300  | 3.22510400  |
| O | -0.66924700 | -1.80950900 | -2.85540600 |
| H | 1.13769300  | -0.87665300 | -2.42109300 |
| H | -0.24834000 | 0.22155700  | -2.73994200 |
| C | 0.14676600  | 2.90555700  | -0.82569700 |
| H | 0.14558000  | 1.25385800  | 3.99252400  |
| H | -1.12896900 | 2.20279200  | 3.16510400  |
| H | 0.45014000  | 2.95941200  | 3.55416400  |
| C | -0.41347400 | -1.99305500 | -4.22035300 |
| H | -0.52822700 | 3.60468000  | -1.34073900 |
| H | 0.40407400  | 3.30597500  | 0.16732800  |
| H | 1.07836400  | 2.81624500  | -1.41944600 |
| H | -1.02884600 | -2.83540300 | -4.56793700 |
| H | 0.65262500  | -2.22893500 | -4.41450600 |
| H | -0.67627700 | -1.09403100 | -4.81410200 |
| H | 0.25451300  | -0.86185300 | 3.01664700  |
| S | -1.69122100 | -2.35770700 | 1.54347500  |
| C | -1.84645300 | -3.98838200 | 0.82833100  |
| C | -2.31831500 | -5.02586900 | 1.64714500  |
| C | -1.55608600 | -4.24035500 | -0.52297900 |
| C | -2.50283300 | -6.30660700 | 1.12152400  |
| H | -2.53346600 | -4.82236700 | 2.69837200  |
| C | -1.72204900 | -5.53157300 | -1.03043900 |
| H | -1.19843400 | -3.44208300 | -1.17348700 |
| C | -2.19919500 | -6.56447400 | -0.21801200 |
| H | -2.87464900 | -7.10754200 | 1.76548000  |
| H | -1.48650900 | -5.72586000 | -2.07994400 |
| H | -2.33548200 | -7.56814400 | -0.62803900 |

**TS5** (*triplet*)

|    |             |             |             |
|----|-------------|-------------|-------------|
| Cu | 0.17489900  | 1.75278600  | 2.50937300  |
| S  | 1.48282200  | 0.12030900  | 1.55546800  |
| C  | 0.39957100  | -0.64707100 | 0.37990600  |
| C  | -0.19585600 | 0.09307700  | -0.65988900 |
| C  | 0.11627000  | -2.02065600 | 0.47014700  |
| C  | -1.04445200 | -0.52425300 | -1.57837300 |
| H  | -0.01013500 | 1.16547800  | -0.73060300 |
| C  | -0.72425700 | -2.63875000 | -0.45766000 |
| H  | 0.55057400  | -2.59539700 | 1.28971800  |

|   |             |             |             |
|---|-------------|-------------|-------------|
| C | -1.31099900 | -1.89535000 | -1.48586900 |
| H | -1.50214400 | 0.07146000  | -2.37268600 |
| H | -0.93451900 | -3.70757400 | -0.36626200 |
| H | -1.97535900 | -2.37820100 | -2.20667200 |
| N | -1.70969800 | 1.21708100  | 1.87459400  |
| C | -2.39940300 | 1.99948200  | 0.99124200  |
| C | -2.30745700 | -0.00667300 | 2.04286900  |
| C | -3.60665800 | 1.23214900  | 0.43146000  |
| O | -2.10779800 | 3.14685500  | 0.67624100  |
| C | -3.52342900 | -0.13075500 | 1.11363300  |
| O | -1.94010200 | -0.88809200 | 2.80461700  |
| H | -3.50801700 | 1.18881400  | -0.66401200 |
| H | -4.52696500 | 1.79559000  | 0.65165400  |
| H | -3.32266300 | -0.95819800 | 0.41655800  |
| H | -4.41090400 | -0.40488400 | 1.70417500  |
| N | -0.48200400 | 3.35068200  | 3.60447900  |
| C | -0.44733600 | 4.55736100  | 3.03175200  |
| C | -0.93697000 | 3.14300600  | 4.84383500  |
| C | -0.93558300 | 5.67139400  | 3.72311800  |
| C | 0.22948200  | 4.58402200  | 1.71435200  |
| C | -1.42490400 | 4.21645500  | 5.59744200  |
| C | -1.42792700 | 5.48635300  | 5.01576200  |
| C | 0.28062900  | 5.70858800  | 0.88903100  |
| N | 0.84333300  | 3.43732700  | 1.37313500  |
| H | -1.77240400 | 4.07210200  | 6.62000200  |
| H | -1.79613900 | 6.34278400  | 5.58450000  |
| C | 0.99161900  | 5.63186900  | -0.30648600 |
| C | 1.53356100  | 3.35958800  | 0.23793100  |
| H | 1.04023800  | 6.49531700  | -0.97370300 |
| C | 1.63947700  | 4.44084200  | -0.63779800 |
| H | 1.99957000  | 2.38867000  | 0.04171700  |
| H | 2.21333500  | 4.34266300  | -1.56070300 |
| H | -0.23547700 | 6.62583800  | 1.17108000  |
| H | -0.89946600 | 6.66454200  | 3.27846400  |
| C | -0.84203800 | 1.73327900  | 5.29933100  |
| C | -1.46393500 | 1.24317400  | 6.45084900  |
| C | -0.02591200 | -0.37502400 | 4.76047700  |
| C | -1.33678800 | -0.11509100 | 6.75311900  |
| H | -2.05414000 | 1.90120100  | 7.08906100  |
| C | -0.61117400 | -0.94030000 | 5.89655100  |
| H | 0.54225400  | -0.96198300 | 4.03536500  |
| H | -1.81791600 | -0.52416400 | 7.64443600  |
| H | -0.50976500 | -2.00956300 | 6.08699900  |
| N | -0.12153800 | 0.92559000  | 4.49607800  |
| C | 3.55913500  | 2.41274700  | 3.02329700  |

|   |            |             |            |
|---|------------|-------------|------------|
| C | 3.83921300 | 1.55362700  | 4.20823100 |
| O | 3.55317000 | 3.76492400  | 3.19898700 |
| C | 3.04776300 | 2.01712500  | 5.43679300 |
| H | 4.91668200 | 1.58622500  | 4.48247300 |
| C | 2.79994700 | 4.24136700  | 4.30802700 |
| C | 3.15889900 | 3.52847800  | 5.62040400 |
| O | 3.49751500 | 1.38907900  | 6.62461200 |
| H | 1.97910600 | 1.80036600  | 5.27623700 |
| C | 2.98091100 | 5.74079000  | 4.38590300 |
| H | 1.73810100 | 4.02987000  | 4.12535200 |
| O | 2.23038700 | 3.99688400  | 6.58170600 |
| H | 4.19535000 | 3.78120400  | 5.92072300 |
| C | 2.91074400 | 0.13674800  | 6.87718900 |
| O | 2.23974500 | 6.34655700  | 3.35284000 |
| H | 4.05942900 | 5.97895300  | 4.28753800 |
| H | 2.63191800 | 6.09099000  | 5.37502800 |
| C | 2.69659800 | 4.05586700  | 7.91104500 |
| H | 3.05325100 | -0.57367600 | 6.04119400 |
| H | 1.82416400 | 0.22436900  | 7.06636000 |
| H | 3.39332900 | -0.28184800 | 7.77251000 |
| C | 2.42425800 | 7.73006600  | 3.26334900 |
| H | 1.87007900 | 4.44052400  | 8.52707400 |
| H | 3.00431700 | 3.06598600  | 8.28175400 |
| H | 3.55587200 | 4.74906700  | 8.00790800 |
| H | 1.80882800 | 8.09848700  | 2.42905300 |
| H | 3.48147600 | 7.99552200  | 3.06171100 |
| H | 2.11448800 | 8.25357800  | 4.19148000 |
| H | 3.60133100 | 0.50753000  | 3.96118400 |
| H | 3.86786200 | 2.11664700  | 2.02006000 |

**int6 (CSS)**

|    |             |             |             |
|----|-------------|-------------|-------------|
| Cu | 0.30745000  | 1.86224500  | 2.22008700  |
| S  | 1.44471000  | 0.03294000  | 1.39446000  |
| C  | 0.27439000  | -0.96571300 | 0.51910300  |
| C  | 0.46414700  | -1.20634100 | -0.85307700 |
| C  | -0.82919200 | -1.56102400 | 1.15943900  |
| C  | -0.40791100 | -2.03853300 | -1.55786400 |
| H  | 1.29561400  | -0.71634600 | -1.36141200 |
| C  | -1.70815000 | -2.37846900 | 0.44920700  |
| H  | -1.01195300 | -1.35826700 | 2.21424100  |
| C  | -1.49937000 | -2.62748300 | -0.91246000 |
| H  | -0.24217100 | -2.21409400 | -2.62397000 |
| H  | -2.56297500 | -2.82481300 | 0.96423200  |
| H  | -2.18719300 | -3.27042100 | -1.46712600 |
| N  | -1.40221500 | 1.48935700  | 1.21683200  |

|   |             |             |             |
|---|-------------|-------------|-------------|
| C | -1.45195700 | 1.49356900  | -0.16093500 |
| C | -2.60463000 | 1.11234100  | 1.75797800  |
| C | -2.81602600 | 0.98922100  | -0.64130400 |
| O | -0.55245200 | 1.82794800  | -0.91235800 |
| C | -3.60603100 | 0.77896900  | 0.64426500  |
| O | -2.87571100 | 1.03891800  | 2.94793100  |
| H | -2.64290200 | 0.06051000  | -1.20554300 |
| H | -3.25128400 | 1.72210800  | -1.33727200 |
| H | -3.95179300 | -0.25498600 | 0.79344800  |
| H | -4.48527300 | 1.43374300  | 0.74940900  |
| N | -0.77383000 | 3.28173400  | 3.43146900  |
| C | -0.90892500 | 4.52272300  | 2.94918900  |
| C | -1.30283600 | 2.93290400  | 4.61328400  |
| C | -1.54776900 | 5.52072100  | 3.69857100  |
| C | -0.34568400 | 4.78263400  | 1.59569800  |
| C | -1.96085600 | 3.88075300  | 5.40744100  |
| C | -2.06809800 | 5.19088400  | 4.94527400  |
| C | -0.61509400 | 5.95352500  | 0.87281600  |
| N | 0.42780000  | 3.82066400  | 1.08537900  |
| H | -2.36198600 | 3.60696700  | 6.38170300  |
| H | -2.55293600 | 5.95283200  | 5.55896600  |
| C | -0.03200900 | 6.11343500  | -0.38423800 |
| C | 0.98401900  | 3.96003000  | -0.11348100 |
| H | -0.22738500 | 7.01648500  | -0.96724200 |
| C | 0.79570400  | 5.10934800  | -0.88614200 |
| H | 1.57985000  | 3.11772600  | -0.46955200 |
| H | 1.26776600  | 5.19615800  | -1.86600900 |
| H | -1.27261000 | 6.72408500  | 1.27368600  |
| H | -1.60640100 | 6.54214700  | 3.32840400  |
| C | -1.14238600 | 1.51347800  | 5.03506800  |
| C | -1.84843700 | 0.96005800  | 6.11222300  |
| C | -0.11820500 | -0.50697200 | 4.58719400  |
| C | -1.66380900 | -0.38891800 | 6.41201900  |
| H | -2.55530500 | 1.55493400  | 6.68924800  |
| C | -0.78509200 | -1.14629800 | 5.63558300  |
| H | 0.57953100  | -1.03863000 | 3.93077200  |
| H | -2.21331000 | -0.84654600 | 7.23788100  |
| H | -0.62131900 | -2.20776400 | 5.83037900  |
| N | -0.29115200 | 0.78080400  | 4.31317400  |
| C | 2.24328800  | 2.38364600  | 2.88659000  |
| C | 2.87608300  | 1.44963900  | 3.89667500  |
| O | 2.29501300  | 3.71026100  | 3.23406900  |
| C | 2.60255200  | 1.81336500  | 5.35602100  |
| H | 3.97309500  | 1.50832800  | 3.75970700  |
| C | 2.08145100  | 4.12452100  | 4.57949600  |

|   |            |             |            |
|---|------------|-------------|------------|
| C | 2.87987700 | 3.29210200  | 5.58908500 |
| O | 3.42202500 | 1.05819000  | 6.23035200 |
| H | 1.54247800 | 1.64425500  | 5.60431600 |
| C | 2.43106600 | 5.60452400  | 4.66438300 |
| H | 1.01819100 | 4.00146000  | 4.82908500 |
| O | 2.46040300 | 3.72417200  | 6.86600100 |
| H | 3.96449900 | 3.47623400  | 5.45109200 |
| C | 2.95709700 | -0.24414300 | 6.48592900 |
| O | 1.66084100 | 6.41208900  | 3.80613600 |
| H | 3.51177700 | 5.73293600  | 4.46019500 |
| H | 2.23909900 | 5.92182700  | 5.69970200 |
| C | 3.42158800 | 3.62845500  | 7.89469200 |
| H | 2.90758000 | -0.86295200 | 5.57066500 |
| H | 1.94901600 | -0.23578500 | 6.94383300 |
| H | 3.66240000 | -0.71580000 | 7.18529700 |
| C | 2.26640700 | 6.71056600  | 2.56770600 |
| H | 2.95451500 | 4.01971200  | 8.81040800 |
| H | 3.74351400 | 2.58864000  | 8.05855800 |
| H | 4.31637900 | 4.24161900  | 7.66814500 |
| H | 1.60716400 | 7.41465200  | 2.04191800 |
| H | 2.40220600 | 5.81375300  | 1.94235100 |
| H | 3.25288500 | 7.19441100  | 2.71051300 |
| H | 2.58918800 | 0.41461600  | 3.67367100 |
| H | 2.67613700 | 2.29442000  | 1.88556200 |

**TS7 (CSS)**

|    |             |             |             |
|----|-------------|-------------|-------------|
| Cu | 0.23246900  | 1.50423500  | 2.63533100  |
| S  | 1.65017000  | -0.24403400 | 2.05369600  |
| C  | 0.68407100  | -0.86162100 | 0.69653100  |
| C  | 1.15146300  | -0.76799500 | -0.62326200 |
| C  | -0.54356100 | -1.50546500 | 0.93764200  |
| C  | 0.40867800  | -1.29676300 | -1.67941700 |
| H  | 2.10016500  | -0.26221700 | -0.81346400 |
| C  | -1.27650600 | -2.04612500 | -0.11789500 |
| H  | -0.92407100 | -1.56171800 | 1.95846700  |
| C  | -0.80723700 | -1.93891700 | -1.43233500 |
| H  | 0.77867900  | -1.19994800 | -2.70323400 |
| H  | -2.22753900 | -2.54564000 | 0.08565200  |
| H  | -1.38997300 | -2.35158500 | -2.25956600 |
| N  | -1.51162600 | 1.29358600  | 1.58739300  |
| C  | -1.62648000 | 1.43578000  | 0.22806300  |
| C  | -2.69613500 | 0.90180000  | 2.14854700  |
| C  | -3.05747200 | 1.11004700  | -0.22668000 |
| O  | -0.73804800 | 1.77627700  | -0.53923800 |
| C  | -3.74846200 | 0.65584100  | 1.05402700  |



|   |             |             |             |
|---|-------------|-------------|-------------|
| O | -2.91391900 | 0.73993900  | 3.34231000  |
| H | -3.00763800 | 0.34791200  | -1.01764800 |
| H | -3.50023900 | 2.01524600  | -0.67228400 |
| H | -3.99063300 | -0.41938200 | 1.05835400  |
| H | -4.67488900 | 1.19510600  | 1.30316000  |
| N | -0.63598700 | 3.12085000  | 3.85663900  |
| C | -0.70487500 | 4.33692300  | 3.30195600  |
| C | -1.19049300 | 2.86445300  | 5.04688900  |
| C | -1.31033700 | 5.40402000  | 3.97793400  |
| C | -0.09951000 | 4.45955600  | 1.94907200  |
| C | -1.81641700 | 3.88334000  | 5.77806700  |
| C | -1.86130600 | 5.16727300  | 5.23619600  |
| C | -0.36686700 | 5.53544900  | 1.09251600  |
| N | 0.69611900  | 3.44765300  | 1.57519100  |
| H | -2.24954500 | 3.68383100  | 6.75752000  |
| H | -2.32524800 | 5.98282500  | 5.79517200  |
| C | 0.22035600  | 5.54783900  | -0.17308400 |
| C | 1.23662400  | 3.44656000  | 0.35959600  |
| H | 0.02215100  | 6.37208400  | -0.86225700 |
| C | 1.04328900  | 4.48759300  | -0.55014800 |
| H | 1.83910200  | 2.57282500  | 0.10159900  |
| H | 1.50254200  | 4.44520900  | -1.53881200 |
| H | -1.03460300 | 6.34058800  | 1.39908100  |
| H | -1.32464000 | 6.40262700  | 3.54327100  |
| C | -1.12210600 | 1.44941300  | 5.50030400  |
| C | -1.88189600 | 0.95898800  | 6.57074500  |
| C | -0.29628900 | -0.65813400 | 5.04296400  |
| C | -1.83420700 | -0.40333000 | 6.86076000  |
| H | -2.53006500 | 1.61844700  | 7.14736400  |
| C | -1.03456100 | -1.23731100 | 6.07711400  |
| H | 0.35256400  | -1.24908700 | 4.38622900  |
| H | -2.43187800 | -0.81182700 | 7.67893400  |
| H | -0.98690400 | -2.31322900 | 6.25568500  |
| N | -0.33208200 | 0.64437900  | 4.78024500  |
| C | 3.30357000  | 1.80054300  | 2.80196300  |
| C | 3.71331300  | 0.88250300  | 3.89626000  |
| O | 3.15045300  | 3.07950100  | 3.06509000  |
| C | 2.99962200  | 1.18223500  | 5.21520700  |
| H | 4.80425700  | 1.01890800  | 4.04822800  |
| C | 2.56982500  | 3.49389200  | 4.31975300  |
| C | 3.05990500  | 2.67374400  | 5.52152000  |
| O | 3.59142800  | 0.47529700  | 6.28612600  |
| H | 1.93580300  | 0.92040800  | 5.10869000  |
| C | 2.82442000  | 4.98107700  | 4.50870400  |
| H | 1.49377200  | 3.30334300  | 4.21278600  |

|   |            |             |            |
|---|------------|-------------|------------|
| O | 2.19281200 | 3.03350400  | 6.57522600 |
| H | 4.10741700 | 2.94279400  | 5.76993200 |
| C | 3.11737000 | -0.84358100 | 6.44241400 |
| O | 2.16459500 | 5.81023000  | 3.58954400 |
| H | 3.91745300 | 5.16809300  | 4.50379600 |
| H | 2.43918500 | 5.22687000  | 5.50870500 |
| C | 2.72911600 | 2.95252000  | 7.87871400 |
| H | 3.24847200 | -1.44788600 | 5.52558700 |
| H | 2.04571000 | -0.86113600 | 6.71252800 |
| H | 3.69848200 | -1.30796700 | 7.25190000 |
| C | 2.87545100 | 6.09271500  | 2.40400600 |
| H | 1.94497400 | 3.29527400  | 8.56897200 |
| H | 3.02729900 | 1.92507400  | 8.13636500 |
| H | 3.61154100 | 3.61267800  | 7.99164000 |
| H | 2.28361700 | 6.82439200  | 1.83778100 |
| H | 3.02236000 | 5.19825100  | 1.77884500 |
| H | 3.86614500 | 6.53500000  | 2.62878200 |
| H | 3.56562600 | -0.15899400 | 3.57949200 |
| H | 3.62478600 | 1.61825400  | 1.77759500 |

**TS8** (*triplet*)

|    |             |             |             |
|----|-------------|-------------|-------------|
| Cu | -0.26257700 | 1.52643500  | 2.58678900  |
| S  | 1.73069600  | 0.31502600  | 1.80060000  |
| C  | 2.40590500  | 1.28222800  | 0.47588800  |
| C  | 3.45709000  | 2.19333500  | 0.69030500  |
| C  | 1.87459300  | 1.15869500  | -0.82225300 |
| C  | 3.96617300  | 2.95002300  | -0.36658000 |
| H  | 3.84349600  | 2.32681900  | 1.69854900  |
| C  | 2.38720500  | 1.92314200  | -1.87196200 |
| H  | 1.02740900  | 0.49375100  | -0.98934400 |
| C  | 3.43831100  | 2.82015800  | -1.65477800 |
| H  | 4.77960300  | 3.65661200  | -0.17705100 |
| H  | 1.95290200  | 1.81816700  | -2.86981800 |
| H  | 3.83768300  | 3.41511600  | -2.47998500 |
| N  | -1.99046000 | 1.28315700  | 1.60821900  |
| C  | -2.18462800 | 1.20185200  | 0.25620900  |
| C  | -3.17439200 | 1.17456000  | 2.30612700  |
| C  | -3.66573700 | 0.93384100  | -0.04755300 |
| O  | -1.32429500 | 1.33484400  | -0.60283000 |
| C  | -4.33472500 | 0.94420100  | 1.32578200  |
| O  | -3.29326300 | 1.24497800  | 3.51577200  |
| H  | -3.74670100 | -0.02753800 | -0.57871800 |
| H  | -4.03179000 | 1.70871400  | -0.73825600 |
| H  | -4.84085900 | 0.00335200  | 1.59180000  |
| H  | -5.07307000 | 1.74997000  | 1.45847600  |

|   |             |             |             |
|---|-------------|-------------|-------------|
| N | 0.31833200  | 2.42120300  | 4.29514200  |
| C | 0.86675900  | 3.64225300  | 4.21183100  |
| C | 0.18308500  | 1.75225300  | 5.45376700  |
| C | 1.28409900  | 4.29906600  | 5.36859400  |
| C | 0.96399300  | 4.13750700  | 2.82477600  |
| C | 0.58790800  | 2.35558100  | 6.65100500  |
| C | 1.13272200  | 3.64101500  | 6.59847800  |
| C | 1.61464600  | 5.31764400  | 2.45225000  |
| N | 0.37946700  | 3.34693100  | 1.88951700  |
| H | 0.48675000  | 1.83541400  | 7.60415100  |
| H | 1.45685700  | 4.13186800  | 7.51797700  |
| C | 1.66467800  | 5.66705200  | 1.10399300  |
| C | 0.41593400  | 3.67968500  | 0.59503600  |
| H | 2.18221400  | 6.57763500  | 0.79355300  |
| C | 1.05709600  | 4.83873300  | 0.15813800  |
| H | -0.07403400 | 2.98246300  | -0.09019900 |
| H | 1.08846600  | 5.06681000  | -0.90717600 |
| H | 2.08783000  | 5.93671500  | 3.21070300  |
| H | 1.74429200  | 5.28211600  | 5.32137100  |
| C | -0.37088900 | 0.40174500  | 5.28231500  |
| C | -0.63362900 | -0.49694600 | 6.32781800  |
| C | -1.10967500 | -1.15769600 | 3.70763100  |
| C | -1.14515500 | -1.75506800 | 6.03106100  |
| H | -0.43997000 | -0.20546300 | 7.36060700  |
| C | -1.38847100 | -2.10020800 | 4.69339300  |
| H | -1.28313000 | -1.35875800 | 2.64753700  |
| H | -1.35666800 | -2.46456000 | 6.83398400  |
| H | -1.79124500 | -3.07640100 | 4.42050000  |
| N | -0.61786300 | 0.04668700  | 3.99443200  |
| C | 3.10796100  | 0.84211400  | 3.91252200  |
| C | 4.21703700  | -0.14494600 | 3.77199000  |
| O | 3.47179900  | 2.16266300  | 3.88539600  |
| H | 2.26349400  | 0.61260500  | 4.56945400  |
| C | 5.34330400  | 0.15709400  | 4.77275600  |
| H | 4.65305200  | -0.09382600 | 2.75876000  |
| C | 4.59731500  | 2.58049200  | 4.66640500  |
| C | 5.78851900  | 1.60494400  | 4.58987300  |
| O | 6.47799400  | -0.66617900 | 4.58677000  |
| H | 4.96913900  | 0.04682200  | 5.81155600  |
| C | 5.03336000  | 3.95087100  | 4.18599800  |
| H | 4.29405500  | 2.65304500  | 5.72704000  |
| O | 6.69165800  | 2.01964200  | 5.59189700  |
| H | 6.25648600  | 1.68234300  | 3.58776500  |
| C | 6.33511100  | -1.98763300 | 5.04118800  |
| O | 4.14882800  | 4.95579400  | 4.62085300  |

|   |            |             |            |
|---|------------|-------------|------------|
| H | 5.09653500 | 3.93772600  | 3.07904900 |
| H | 6.04493300 | 4.13990600  | 4.59010800 |
| C | 8.06085600 | 1.83538100  | 5.30325200 |
| H | 5.57499500 | -2.55375600 | 4.47096400 |
| H | 6.05799200 | -2.02357200 | 6.11370600 |
| H | 7.30539900 | -2.48835300 | 4.91205700 |
| C | 4.59050700 | 6.24471500  | 4.29319300 |
| H | 8.62677700 | 2.23045700  | 6.15966500 |
| H | 8.30900400 | 0.77339600  | 5.15475400 |
| H | 8.36062200 | 2.39691800  | 4.39589100 |
| H | 3.86704600 | 6.96693700  | 4.70091400 |
| H | 4.65882100 | 6.39371100  | 3.19651200 |
| H | 5.58614200 | 6.46292400  | 4.72863100 |
| H | 3.81735000 | -1.16030300 | 3.90309800 |

**P<sub>Eq</sub> (CSS)**

|   |             |             |             |
|---|-------------|-------------|-------------|
| C | -0.25080900 | -1.93371000 | 1.01294100  |
| C | 0.27820400  | -0.80435200 | 1.89134400  |
| O | 0.20130900  | -1.75525100 | -0.31161100 |
| H | -1.35793100 | -1.94871700 | 1.02531900  |
| C | -0.13043500 | 0.55794700  | 1.31029800  |
| H | 1.37858200  | -0.85683100 | 1.92083100  |
| C | -0.32414400 | -0.58656500 | -0.91483200 |
| C | 0.19887600  | 0.65857200  | -0.18349200 |
| O | 0.51364000  | 1.62752900  | 1.97273300  |
| H | -1.23011300 | 0.67849400  | 1.39668200  |
| C | 0.04850200  | -0.62385500 | -2.38032800 |
| H | -1.43076600 | -0.58907900 | -0.84824200 |
| O | -0.40766400 | 1.78576100  | -0.77395800 |
| H | 1.30041700  | 0.69914900  | -0.29410100 |
| C | -0.01845700 | 1.95909800  | 3.23073900  |
| O | -0.67098900 | -1.66238000 | -2.99582400 |
| H | 1.14171300  | -0.79038500 | -2.46915500 |
| H | -0.19256800 | 0.35556400  | -2.83479800 |
| C | 0.36130800  | 2.96856800  | -0.78561200 |
| H | 0.10627600  | 1.14820000  | 3.97291500  |
| H | -1.09712700 | 2.20349600  | 3.16616800  |
| H | 0.52203900  | 2.84442600  | 3.59491400  |
| C | -0.34166700 | -1.85195100 | -4.34451500 |
| H | -0.22717500 | 3.73129200  | -1.31622600 |
| H | 0.58923600  | 3.32096100  | 0.23247100  |
| H | 1.31675900  | 2.82291700  | -1.32751100 |
| H | -0.96096200 | -2.67450300 | -4.73030700 |
| H | 0.72584300  | -2.12125900 | -4.47622600 |
| H | -0.54079900 | -0.94458100 | -4.95054500 |

|   |             |             |             |
|---|-------------|-------------|-------------|
| H | -0.09626300 | -0.91847600 | 2.91928000  |
| S | 0.31997500  | -3.54358700 | 1.63987000  |
| C | -0.78598700 | -4.66790000 | 0.80049800  |
| C | -1.20057000 | -4.47852800 | -0.52882200 |
| C | -1.21132900 | -5.80283000 | 1.50878500  |
| C | -2.05416200 | -5.41286400 | -1.12093400 |
| H | -0.85396500 | -3.61467000 | -1.09681600 |
| C | -2.04162800 | -6.74241400 | 0.89484600  |
| H | -0.89728800 | -5.93980500 | 2.54620600  |
| C | -2.47299700 | -6.54747900 | -0.42034000 |
| H | -2.38193300 | -5.25335600 | -2.15139000 |
| H | -2.36510300 | -7.62361900 | 1.45461600  |
| H | -3.13210400 | -7.27716100 | -0.89660300 |

**TS9** (*triplet*)

|    |             |             |             |
|----|-------------|-------------|-------------|
| Cu | 0.41066300  | 1.80185200  | 2.71192000  |
| S  | 1.62512900  | 0.16531300  | 1.29408000  |
| C  | 0.46648600  | -0.75918800 | 0.37566100  |
| C  | 0.68402600  | -0.95969500 | -1.00690900 |
| C  | -0.70829800 | -1.28975600 | 0.95825400  |
| C  | -0.23522400 | -1.66898000 | -1.77556400 |
| H  | 1.57787600  | -0.52906800 | -1.46098800 |
| C  | -1.62112000 | -2.00196600 | 0.18541800  |
| H  | -0.91100700 | -1.11511900 | 2.01316400  |
| C  | -1.39108500 | -2.19381800 | -1.18337800 |
| H  | -0.05644500 | -1.80857200 | -2.84447100 |
| H  | -2.52486500 | -2.40178800 | 0.65163400  |
| H  | -2.11357800 | -2.74733200 | -1.78810300 |
| N  | -1.27210600 | 1.63092600  | 1.51458900  |
| C  | -1.15869900 | 1.89637300  | 0.17497300  |
| C  | -2.53251100 | 1.21127200  | 1.83715400  |
| C  | -2.48076100 | 1.59780600  | -0.54359700 |
| O  | -0.14427100 | 2.27759900  | -0.39123800 |
| C  | -3.42159500 | 1.18171300  | 0.58342200  |
| O  | -2.92176300 | 0.88458200  | 2.95187100  |
| H  | -2.28929800 | 0.79653500  | -1.27376100 |
| H  | -2.80209000 | 2.48557500  | -1.10910500 |
| H  | -3.83328300 | 0.16716400  | 0.47254600  |
| H  | -4.27492100 | 1.86157100  | 0.73395800  |
| N  | -0.80774800 | 2.87210200  | 4.18691900  |
| C  | -1.05180100 | 4.16167700  | 3.94723500  |
| C  | -1.50606000 | 2.17059300  | 5.07865600  |
| C  | -2.05898100 | 4.83944800  | 4.64930200  |
| C  | -0.20108100 | 4.78280400  | 2.89475000  |
| C  | -2.52872700 | 2.77890600  | 5.81968900  |

|   |             |             |             |
|---|-------------|-------------|-------------|
| C | -2.79980100 | 4.12766800  | 5.59374300  |
| C | -0.10307100 | 6.16685900  | 2.70428000  |
| N | 0.49474400  | 3.92716200  | 2.12768900  |
| H | -3.11851800 | 2.21173300  | 6.53862600  |
| H | -3.60084800 | 4.62361900  | 6.14616600  |
| C | 0.74902800  | 6.64967000  | 1.70855300  |
| C | 1.29135700  | 4.37762700  | 1.16257100  |
| H | 0.85627000  | 7.72583400  | 1.55407700  |
| C | 1.46070600  | 5.74391800  | 0.92327600  |
| H | 1.78610800  | 3.61896400  | 0.56429900  |
| H | 2.14707100  | 6.07471300  | 0.14284000  |
| H | -0.66207000 | 6.85778500  | 3.33592200  |
| H | -2.27693000 | 5.88846900  | 4.44976300  |
| C | -1.10753100 | 0.74267700  | 5.21817800  |
| C | -1.60957500 | -0.09460300 | 6.22253800  |
| C | 0.22807300  | -0.95939100 | 4.39498500  |
| C | -1.16349800 | -1.41451900 | 6.28930800  |
| H | -2.33634300 | 0.27508600  | 6.94545900  |
| C | -0.22361800 | -1.86263600 | 5.36061900  |
| H | 0.96222700  | -1.24392200 | 3.63282900  |
| H | -1.54610300 | -2.08441600 | 7.06277100  |
| H | 0.15411800  | -2.88633900 | 5.37770300  |
| N | -0.20622800 | 0.29415800  | 4.33137500  |
| C | 2.24664300  | 2.24891500  | 3.62244900  |
| C | 2.80819900  | 1.29172100  | 4.64550600  |
| O | 3.12673900  | 2.37407400  | 2.53051900  |
| C | 4.19333400  | 1.77442400  | 5.10833000  |
| H | 2.92056400  | 0.28469300  | 4.21149500  |
| C | 4.38671800  | 2.92736000  | 2.85644000  |
| C | 5.10044100  | 2.06439100  | 3.91065200  |
| O | 4.86059800  | 0.82583000  | 5.92736700  |
| H | 4.08024200  | 2.72516700  | 5.66953800  |
| C | 5.21511100  | 3.03167200  | 1.58017800  |
| H | 4.24469000  | 3.94372800  | 3.27740900  |
| O | 6.27288800  | 2.76026700  | 4.28563800  |
| H | 5.35836000  | 1.09144600  | 3.44681700  |
| C | 4.33810500  | 0.68737600  | 7.22115000  |
| O | 4.56146000  | 3.75643800  | 0.56383000  |
| H | 5.46518500  | 2.01079100  | 1.23471800  |
| H | 6.15769700  | 3.54199500  | 1.83275200  |
| C | 7.38234300  | 1.96265300  | 4.62843700  |
| H | 3.32213000  | 0.24802000  | 7.22734200  |
| H | 4.29168800  | 1.65944400  | 7.75262200  |
| H | 5.00597000  | 0.01507100  | 7.77982100  |
| C | 3.99689400  | 2.95324500  | -0.44921500 |

|   |            |            |             |
|---|------------|------------|-------------|
| H | 8.22238200 | 2.64414800 | 4.83020100  |
| H | 7.18748300 | 1.34444500 | 5.51915100  |
| H | 7.67035700 | 1.29059700 | 3.79533900  |
| H | 3.47948100 | 3.62286700 | -1.15232700 |
| H | 3.27311400 | 2.21949000 | -0.05505100 |
| H | 4.77777300 | 2.40275900 | -1.01184900 |
| H | 2.12464600 | 1.21301300 | 5.50377900  |
| H | 2.04866300 | 3.24125800 | 4.07240400  |

**int10 (CSS)**

|    |             |             |             |
|----|-------------|-------------|-------------|
| Cu | 0.35296900  | 1.70694200  | 2.51622400  |
| S  | 1.50061200  | 0.03683400  | 1.45089200  |
| C  | 0.28528400  | -0.80293500 | 0.47075100  |
| C  | 0.44415000  | -0.80688800 | -0.92672400 |
| C  | -0.80561600 | -1.49682900 | 1.02742100  |
| C  | -0.44396600 | -1.51118500 | -1.74269800 |
| H  | 1.26303100  | -0.23258300 | -1.36185800 |
| C  | -1.70314300 | -2.18068900 | 0.20813000  |
| H  | -0.96893100 | -1.46974000 | 2.10378000  |
| C  | -1.52306100 | -2.19908300 | -1.18040700 |
| H  | -0.30196600 | -1.50543100 | -2.82645000 |
| H  | -2.55073300 | -2.70399600 | 0.65837400  |
| H  | -2.22572400 | -2.73948300 | -1.81944000 |
| N  | -1.31140700 | 1.53888400  | 1.46090500  |
| C  | -1.28485300 | 1.83523000  | 0.11350200  |
| C  | -2.53948800 | 1.07373400  | 1.85388900  |
| C  | -2.62056100 | 1.45221600  | -0.52821900 |
| O  | -0.34106200 | 2.30572200  | -0.49572900 |
| C  | -3.48530800 | 1.01254800  | 0.64806900  |
| O  | -2.86740900 | 0.75040800  | 2.98626800  |
| H  | -2.41730400 | 0.63964100  | -1.24189200 |
| H  | -3.01329000 | 2.30534500  | -1.10111500 |
| H  | -3.86854700 | -0.01502900 | 0.56386100  |
| H  | -4.34868100 | 1.66815200  | 0.84272800  |
| N  | -0.76897600 | 2.82609800  | 4.11409500  |
| C  | -0.94829800 | 4.13550700  | 3.89919000  |
| C  | -1.47847800 | 2.17636900  | 5.04605900  |
| C  | -1.88652900 | 4.87408400  | 4.63356900  |
| C  | -0.11041400 | 4.74869900  | 2.83170700  |
| C  | -2.43287000 | 2.85468900  | 5.81905000  |
| C  | -2.63778100 | 4.21411700  | 5.60307800  |
| C  | 0.10723400  | 6.12893000  | 2.72273800  |
| N  | 0.44759600  | 3.88952000  | 1.97193900  |
| H  | -3.01963100 | 2.32732700  | 6.56875300  |
| H  | -3.38772400 | 4.75610200  | 6.18321200  |

|   |             |             |             |
|---|-------------|-------------|-------------|
| C | 0.93744000  | 6.59438900  | 1.70067600  |
| C | 1.21781500  | 4.32453500  | 0.97877300  |
| H | 1.14265500  | 7.66333700  | 1.60693200  |
| C | 1.50352500  | 5.68187400  | 0.81081900  |
| H | 1.58610000  | 3.55941500  | 0.30067900  |
| H | 2.16927200  | 6.00108200  | 0.00840200  |
| H | -0.33460800 | 6.82511300  | 3.43587300  |
| H | -2.04300300 | 5.93327700  | 4.43237400  |
| C | -1.19424900 | 0.72408600  | 5.22471500  |
| C | -1.83339100 | -0.06071700 | 6.19615700  |
| C | 0.03238600  | -1.08613200 | 4.48396600  |
| C | -1.51114800 | -1.41441800 | 6.28457900  |
| H | -2.57742000 | 0.36419100  | 6.86849300  |
| C | -0.55921400 | -1.94620800 | 5.41351600  |
| H | 0.78222900  | -1.43297500 | 3.76429400  |
| H | -2.00299700 | -2.04725200 | 7.02695900  |
| H | -0.28062500 | -3.00106100 | 5.44695200  |
| N | -0.28217300 | 0.20224600  | 4.40214200  |
| C | 2.13991600  | 2.08128600  | 3.35047900  |
| C | 2.71031000  | 1.10609900  | 4.34500000  |
| O | 3.04695900  | 2.35144900  | 2.33171000  |
| C | 4.00646000  | 1.70260300  | 4.92970000  |
| H | 2.94860900  | 0.14982000  | 3.85401500  |
| C | 4.22713800  | 3.00434800  | 2.76717300  |
| C | 4.95591700  | 2.15312700  | 3.81877400  |
| O | 4.70280800  | 0.77483600  | 5.74020500  |
| H | 3.75789800  | 2.60087000  | 5.53243800  |
| C | 5.11195100  | 3.25071800  | 1.54678900  |
| H | 3.95900700  | 3.97758600  | 3.22618900  |
| O | 6.02102600  | 2.93941000  | 4.31036100  |
| H | 5.33991700  | 1.24069000  | 3.32172300  |
| C | 4.11202900  | 0.50754200  | 6.98536100  |
| O | 4.43621400  | 3.89050800  | 0.49306100  |
| H | 5.53278300  | 2.28360000  | 1.21151200  |
| H | 5.95075200  | 3.88716500  | 1.86826600  |
| C | 7.18443900  | 2.23763500  | 4.68779000  |
| H | 3.14792800  | -0.02744700 | 6.89329800  |
| H | 3.93487600  | 1.43717200  | 7.56252900  |
| H | 4.80658500  | -0.13013700 | 7.55119900  |
| C | 3.97008200  | 3.01267400  | -0.51301900 |
| H | 7.92965100  | 2.98694200  | 4.99334400  |
| H | 6.99542400  | 1.54423800  | 5.52243300  |
| H | 7.59872500  | 1.65735000  | 3.83963400  |
| H | 3.43908300  | 3.62171100  | -1.25927900 |
| H | 3.28391400  | 2.24488000  | -0.11796000 |



|   |            |            |             |
|---|------------|------------|-------------|
| H | 4.81378500 | 2.50486000 | -1.02121200 |
| H | 1.98684200 | 0.91385800 | 5.14556800  |
| H | 1.81904000 | 3.01356800 | 3.84831100  |

**TS11 (CSS)**

|    |             |             |             |
|----|-------------|-------------|-------------|
| Cu | -0.58992000 | 1.32378300  | 2.69080700  |
| S  | 0.42212200  | -0.58155900 | 2.02989300  |
| C  | 1.17864800  | -0.45042900 | 0.43660600  |
| C  | 2.48779500  | -0.93637600 | 0.26490600  |
| C  | 0.46644300  | 0.02721800  | -0.67680500 |
| C  | 3.07048200  | -0.95925600 | -1.00220300 |
| H  | 3.03833100  | -1.29517400 | 1.13619600  |
| C  | 1.06008700  | 0.00435700  | -1.94128600 |
| H  | -0.54112100 | 0.42632700  | -0.54101100 |
| C  | 2.35701900  | -0.49090900 | -2.11104900 |
| H  | 4.08681700  | -1.34217600 | -1.12559900 |
| H  | 0.49843200  | 0.37669800  | -2.80190500 |
| H  | 2.81359100  | -0.50942100 | -3.10384800 |
| N  | -2.57116600 | 1.27998200  | 2.14952300  |
| C  | -2.90852100 | 1.44462700  | 0.83633700  |
| C  | -3.68933700 | 1.18609500  | 2.93698500  |
| C  | -4.43168300 | 1.39343700  | 0.65206200  |
| O  | -2.12544300 | 1.62037400  | -0.09117300 |
| C  | -4.96068400 | 1.22375700  | 2.07180000  |
| O  | -3.71577600 | 1.09800400  | 4.15636500  |
| H  | -4.67534400 | 0.55908700  | -0.02408800 |
| H  | -4.76239000 | 2.31607800  | 0.15045300  |
| H  | -5.52605300 | 0.29326200  | 2.23617700  |
| H  | -5.60057600 | 2.04981600  | 2.41906600  |
| N  | -1.03105900 | 2.76361900  | 4.42131000  |
| C  | -0.96144000 | 4.06933900  | 4.13593700  |
| C  | -1.49270900 | 2.33717800  | 5.60201400  |
| C  | -1.36935500 | 5.03887600  | 5.06506900  |
| C  | -0.44832600 | 4.42929700  | 2.78133000  |
| C  | -1.89244800 | 3.25221400  | 6.58865500  |
| C  | -1.83224600 | 4.61463500  | 6.30815900  |
| C  | -0.10514000 | 5.74208500  | 2.42768800  |
| N  | -0.33628900 | 3.42205300  | 1.90159700  |
| H  | -2.23949300 | 2.90778200  | 7.56154700  |
| H  | -2.14907400 | 5.34503100  | 7.05584400  |
| C  | 0.35259800  | 5.99343800  | 1.13397600  |
| C  | 0.07986800  | 3.66043500  | 0.65944400  |
| H  | 0.63995500  | 7.00562700  | 0.84082900  |
| C  | 0.44214700  | 4.93862600  | 0.22851500  |
| H  | 0.10825100  | 2.79886700  | -0.00682600 |

|   |             |             |             |
|---|-------------|-------------|-------------|
| H | 0.79816300  | 5.09339800  | -0.79010500 |
| H | -0.17560700 | 6.55478700  | 3.15020700  |
| H | -1.33907900 | 6.09979700  | 4.82092300  |
| C | -1.55584900 | 0.86352100  | 5.81574000  |
| C | -2.30133300 | 0.30247500  | 6.86330700  |
| C | -0.93028100 | -1.22455600 | 5.06891800  |
| C | -2.35229800 | -1.08276100 | 6.98887400  |
| H | -2.87220500 | 0.93239000  | 7.54412300  |
| C | -1.65574600 | -1.87085600 | 6.07194500  |
| H | -0.36499800 | -1.79668300 | 4.32689800  |
| H | -2.94238200 | -1.54170900 | 7.78552500  |
| H | -1.67414500 | -2.96093800 | 6.12460300  |
| N | -0.87811600 | 0.10149700  | 4.95004900  |
| C | 1.51684200  | 1.34103600  | 3.06845200  |
| C | 2.27658300  | 0.56356200  | 4.10753400  |
| O | 2.32095200  | 1.69567900  | 1.99654100  |
| C | 3.36920800  | 1.49790400  | 4.65552600  |
| H | 2.74841600  | -0.32461500 | 3.66536700  |
| C | 3.31011100  | 2.64807100  | 2.38067000  |
| C | 4.19705100  | 2.08907000  | 3.51128600  |
| O | 4.25954900  | 0.83262900  | 5.53069600  |
| H | 2.89645100  | 2.34812300  | 5.18960600  |
| C | 4.15509200  | 3.01170400  | 1.16648700  |
| H | 2.80822700  | 3.56349500  | 2.75175000  |
| O | 5.01155100  | 3.15655100  | 3.94789100  |
| H | 4.81623400  | 1.26921900  | 3.09588900  |
| C | 3.72930600  | 0.53028600  | 6.79594500  |
| O | 3.43412500  | 3.63560200  | 0.13618200  |
| H | 4.66105600  | 2.09750200  | 0.80065300  |
| H | 4.92717000  | 3.71234300  | 1.51887500  |
| C | 6.30791700  | 2.80798200  | 4.38071500  |
| H | 2.90762400  | -0.20871800 | 6.74728000  |
| H | 3.34470900  | 1.43643500  | 7.30524300  |
| H | 4.54162100  | 0.10386800  | 7.40197900  |
| C | 2.98617100  | 2.75539500  | -0.87276500 |
| H | 6.82498800  | 3.74372400  | 4.63944700  |
| H | 6.28405400  | 2.14445400  | 5.25939700  |
| H | 6.87929100  | 2.30294400  | 3.57672700  |
| H | 2.44304800  | 3.35450200  | -1.61817500 |
| H | 2.31785500  | 1.97741800  | -0.48051600 |
| H | 3.83440800  | 2.25798100  | -1.38092100 |
| H | 1.59657200  | 0.24150300  | 4.90468800  |
| H | 1.10658000  | 2.24879700  | 3.53758300  |

## 8. References

1. Zhu, F.; Rourke, M. J.; Yang, T.; Rodriguez, J.; Walczak, M. A. Highly Stereospecific Cross-Coupling Reactions of Anomeric Stannanes for the Synthesis of C-Aryl Glycosides *J. Am. Chem. Soc.*, **2016**, *138*, 12049-12052.
2. Zhu, F.; Miller, E.; Zhang, S.-Q.; Yi, D.; O'Neill, S.; Hong, X.; Walczak, M. A. Stereoretentive C(sp<sup>3</sup>)-S Cross-Coupling. *J. Am. Chem. Soc.*, **2018**, *140*, 18140-18150.
3. Zhu, F.; Rourke, M. J.; Yang, T.; Rodriguez, J.; Walczak, M. A. Glycosyl Cross-Coupling of Anomeric Nucleophiles: Scope, Mechanism, and Applications in the Synthesis of Aryl C-Glycosides. *J. Am. Chem. Soc.*, **2017**, *139*, 17908-17922.
4. Jin, Y.; Yang, H.; Fu, H. An *N*-(acetoxyl)phthalimide motif as a visible-light pro-photosensitizer in photoredox decarboxylative arylthiation *Chem. Commun.*, **2016**, *52*, 12909-12911.
5. Sau, A.; Williams, R.; Palo-Nieto, C.; Franconetti, A.; Medina, S.; Galan, M. C. Palladium-catalyzed direct stereoselective synthesis of deoxyglycosides from glycals. *Angew. Chem. Int. Ed.* **2017**, *56*, 3640-3644.
6. Chambers, D. J.; Evans, G. R.; Fairbanks, A. J. An approach to the synthesis of  $\alpha$ -(1-6)-C-disaccharides by tandem Tebbe methylenation and Claisen rearrangement. *Tetrahedron*, **2005**, *61*, 7184-7192.
7. *Gaussian 16, Revision A.03*, M. J. Frisch, G. W. Trucks, H. B. Schlegel, G. E. Scuseria, M. A. Robb, J. R. Cheeseman, G. Scalmani, V. Barone, G. A. Petersson, H. Nakatsuji, X. Li, M. Caricato, A. V. Marenich, J. Bloino, B. G. Janesko, R. Gomperts, B. Mennucci, H. P. Hratchian, J. V. Ortiz, A. F. Izmaylov, J. L. Sonnenberg, D. Williams-Young, F. Ding, F. Lipparini, F. Egidi, J. Goings, B. Peng, A. Petrone, T. Henderson, D. Ranasinghe, V. G. Zakrzewski, J. Gao, N. Rega, G. Zheng, W. Liang, M. Hada, M. Ehara, K. Toyota, R. Fukuda, J. Hasegawa, M. Ishida, T. Nakajima, Y. Honda, O. Kitao, H. Nakai, T. Vreven, K. Throssell, J. A. Montgomery, Jr., J. E. Peralta, F. Ogliaro, M. J. Bearpark, J. J. Heyd, E. N. Brothers, K. N. Kudin, V. N. Staroverov, T. A. Keith, R. Kobayashi, J. Normand, K. Raghavachari, A. P. Rendell, J. C. Burant, S. S. Iyengar, J. Tomasi, M. Cossi, J. M. Millam, M. Klene, C. Adamo, R. Cammi, J. W. Ochterski, R. L. Martin, K. Morokuma, O. Farkas, J. B. Foresman, D. J. Fox, Gaussian, Inc., Wallingford CT, **2016**.
8. (a) Becke, A. D. Density-functional thermochemistry. III. The role of exact exchange. *J. Chem. Phys.* **1993**, *98*, 5648-5652. (b) Lee, C., Yang, W., Parr, R. G. Development of the Colle-Salvetti correlation-energy formula into a functional of the electron density. *Phys. Rev. B: Condens. Matter Mater. Phys.* **1988**, *37*, 785-789.
9. Grimme, S., Ehrlich, S., Goerigk, L. Effect of the damping function in dispersion corrected density functional theory. *J. Comp. Chem.* **2011**, *32*, 1456-1465.
10. Weigend, F., Ahlrichs, R. Balanced basis sets of split valence, triple zeta valence and quadruple zeta valence quality for H to Rn: Design and assessment of accuracy. *Phys. Chem. Chem. Phys.* **2005**, *7*, 3297-3305.
11. Marenich, A. V., Cramer, C. J., Truhlar, D. G. Universal solvation model based on solute electron density and a continuum model of the solvent defined by the bulk dielectric constant and atomic surface tensions. *J. Phys. Chem. B* **2009**, *113*, 6378-6396.
12. *CYLVview, 1.0b*, C. Y. Legault, Université de Sherbrooke, **2009** (<http://www.cylvview.org>).

## 9. Copies of 1D and 2D NMR Spectra

**17a** (<sup>1</sup>H NMR, 300MHz, CDCl<sub>3</sub>)

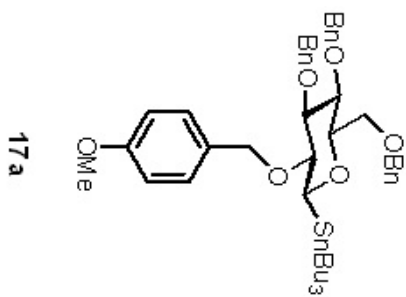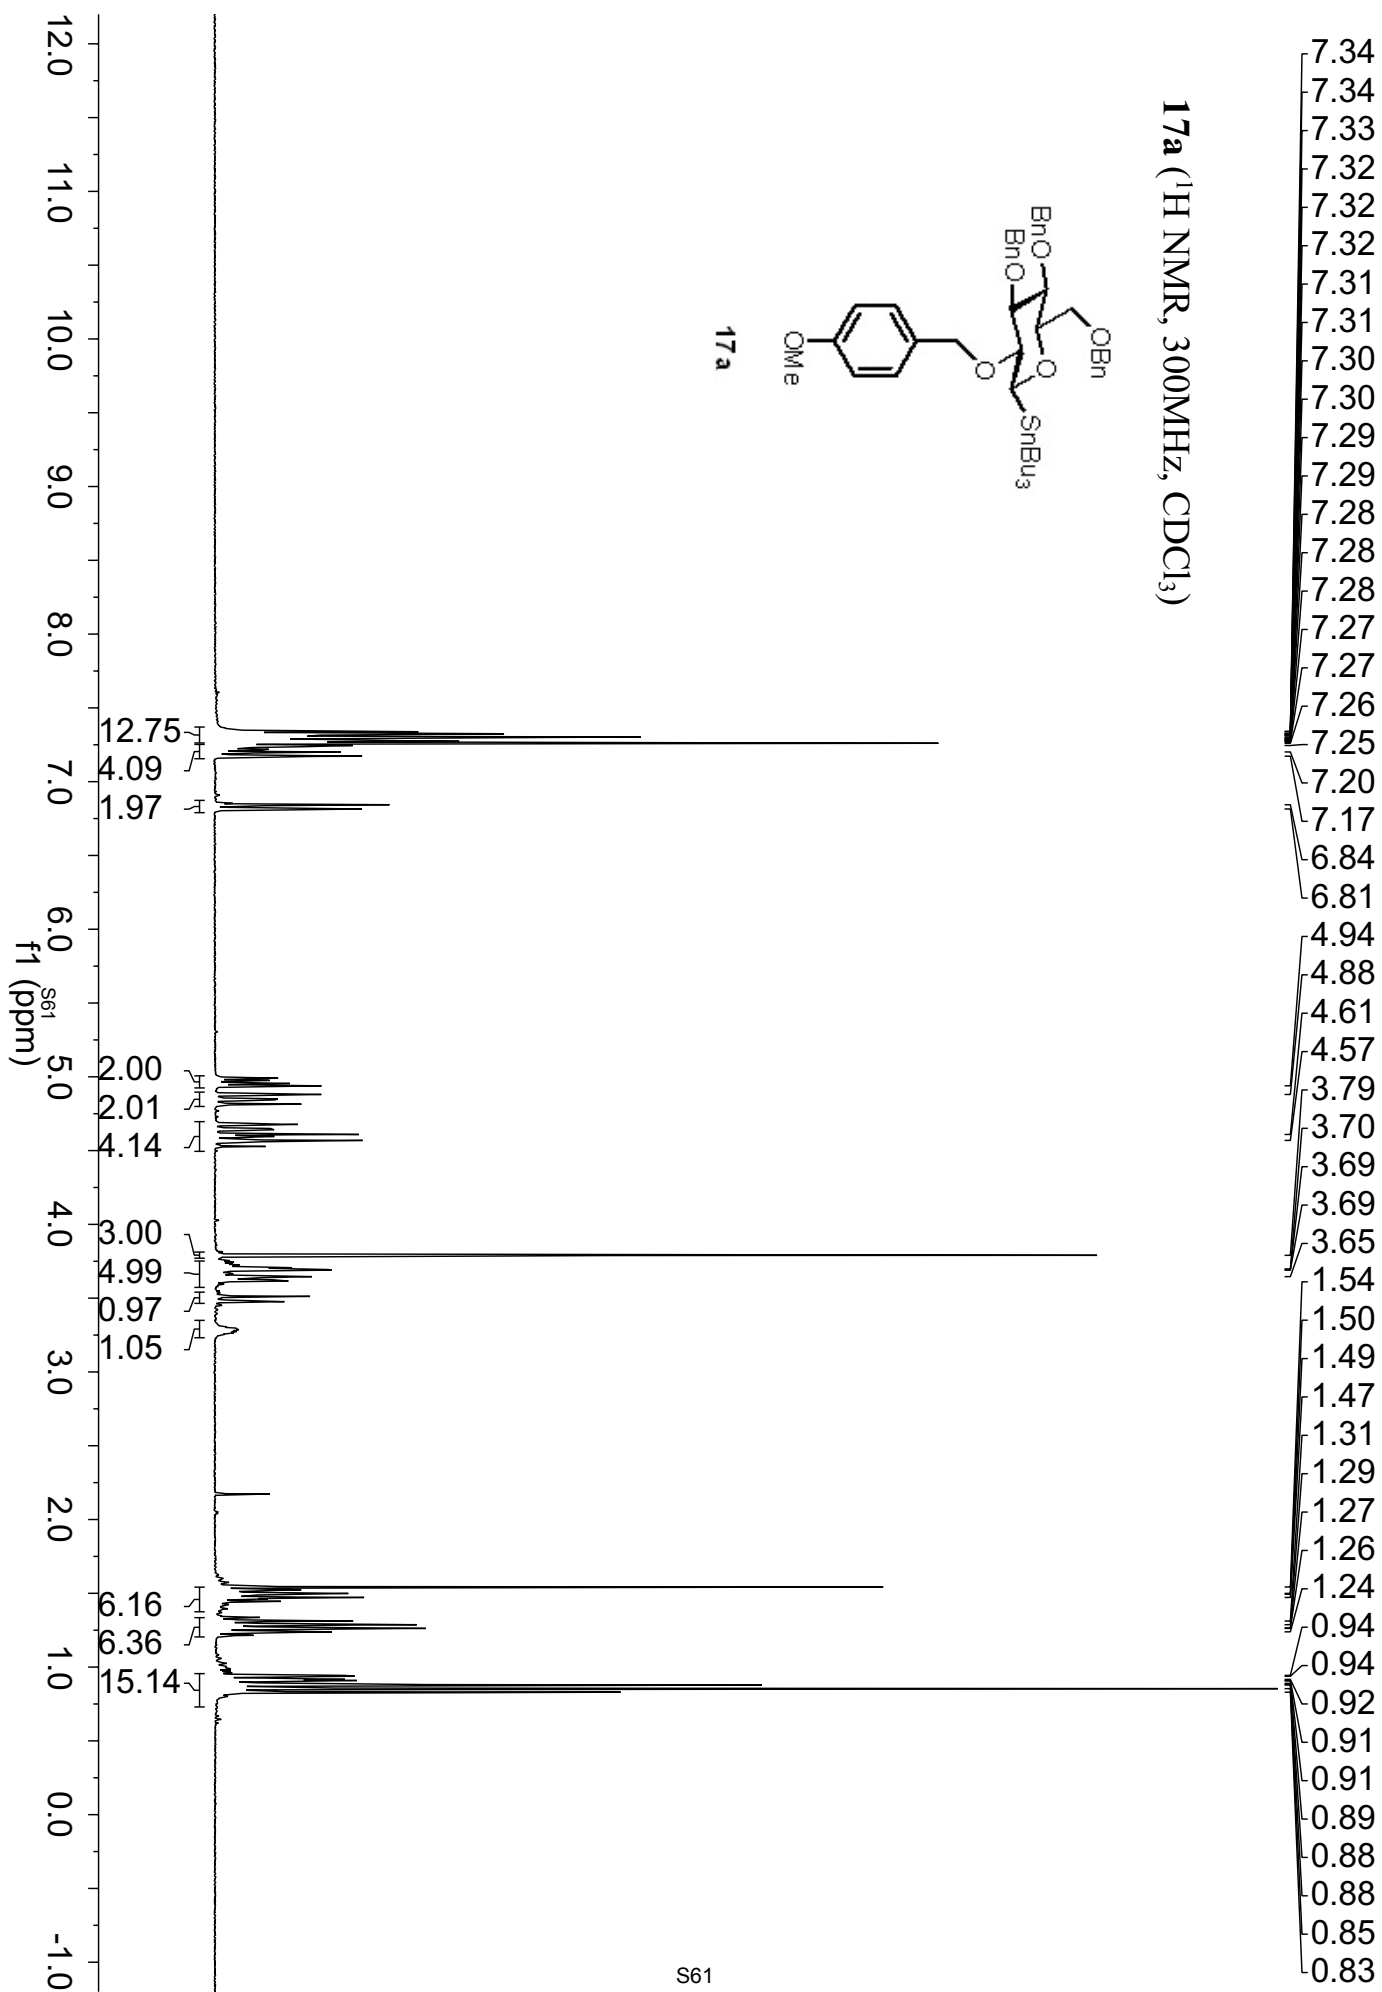

**17a** ( $^{13}\text{C}$  NMR, 75MHz,  $\text{CDCl}_3$ )

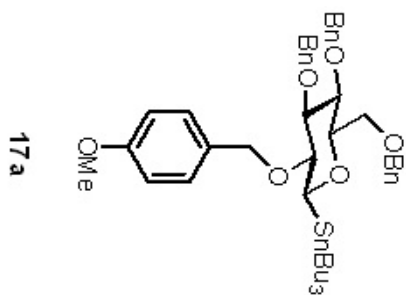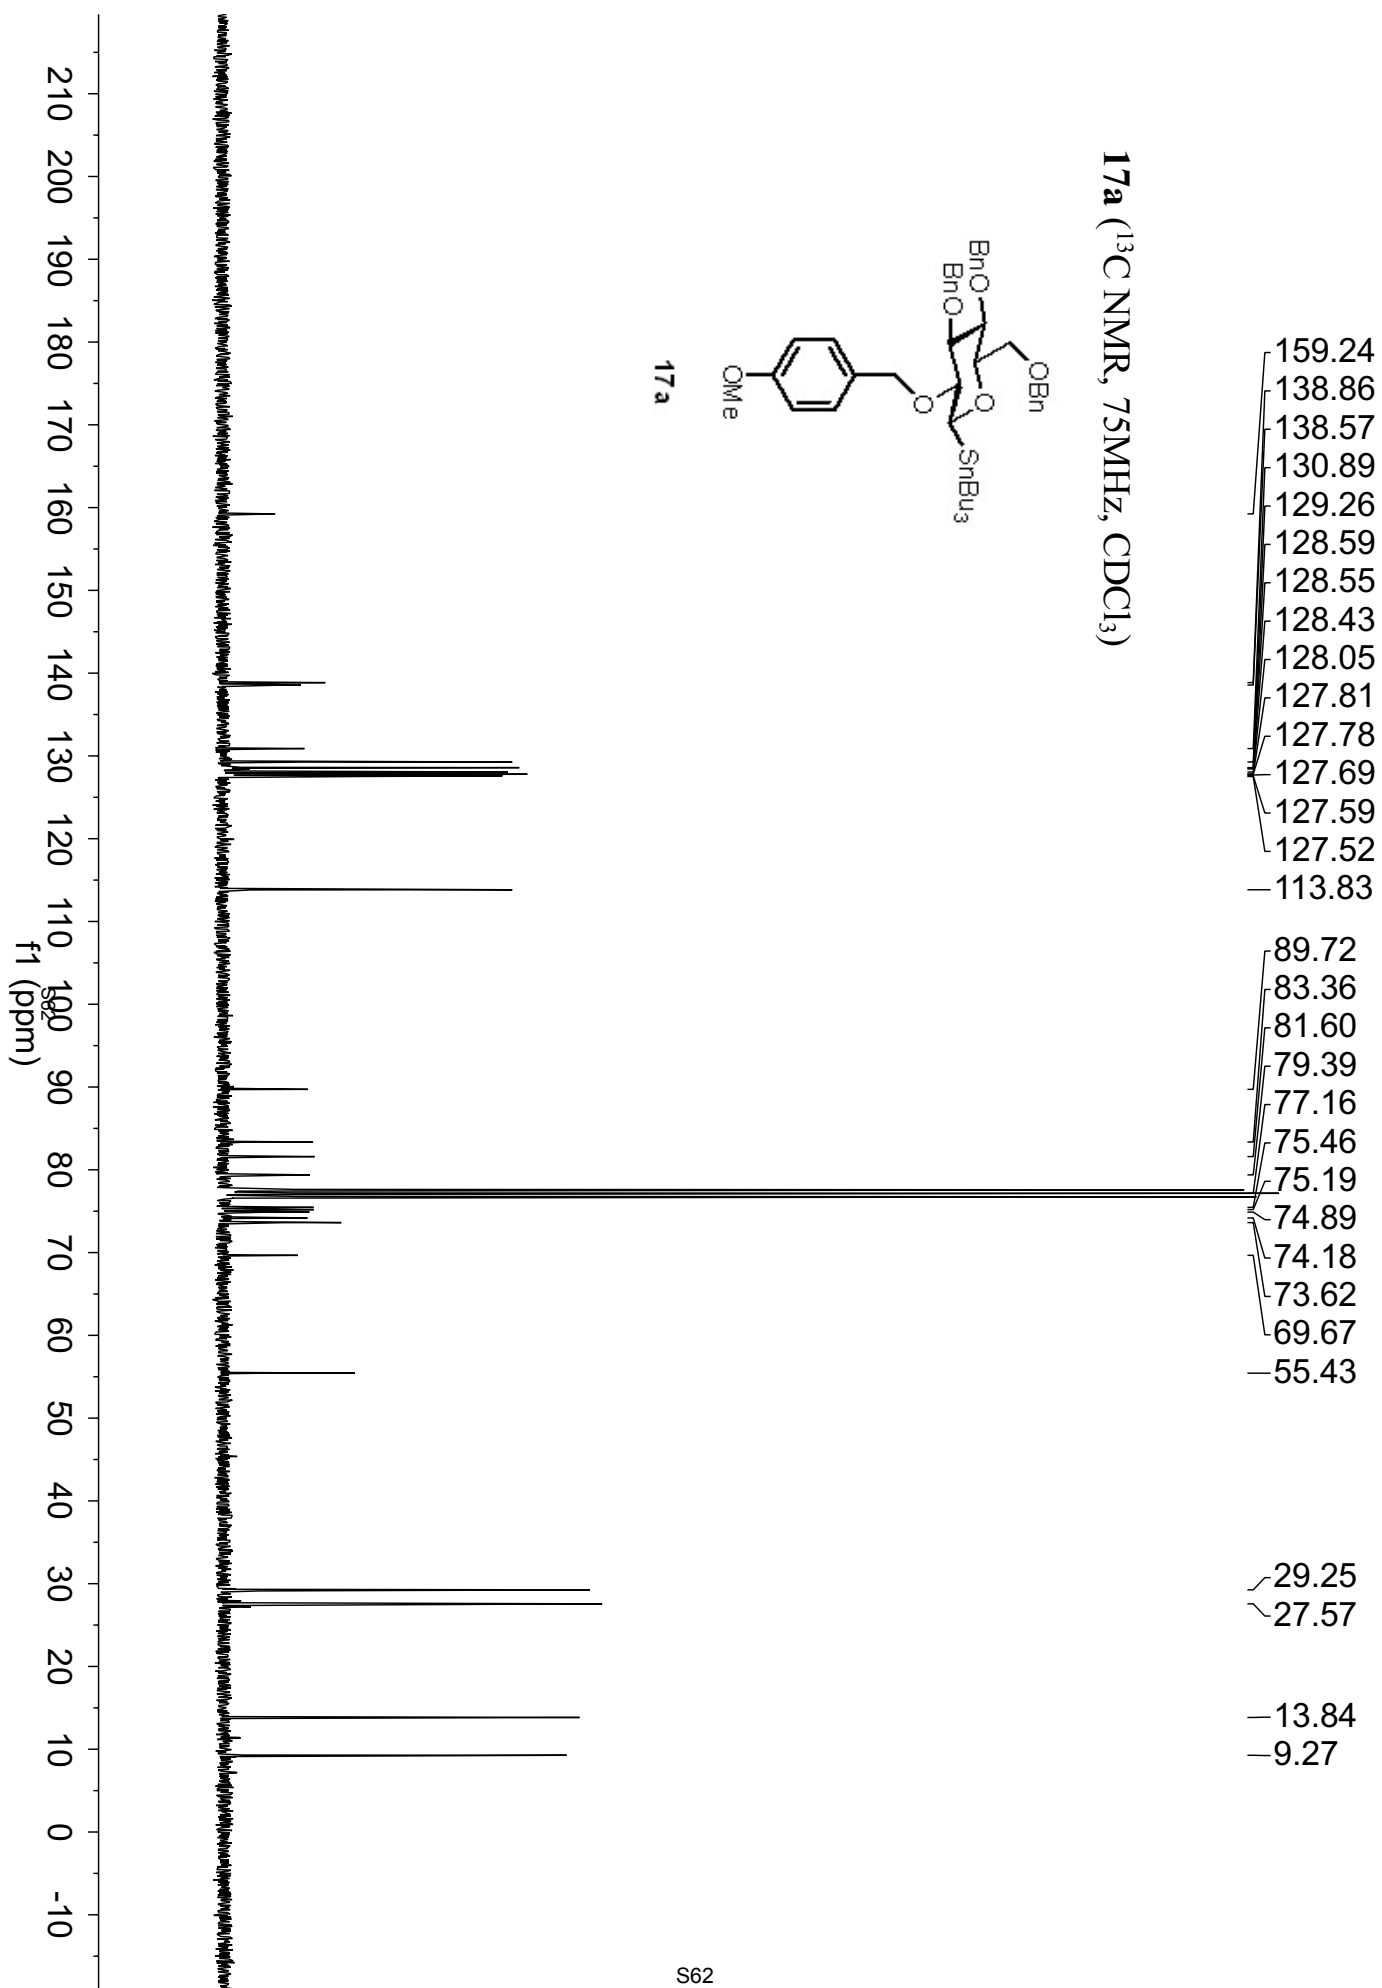

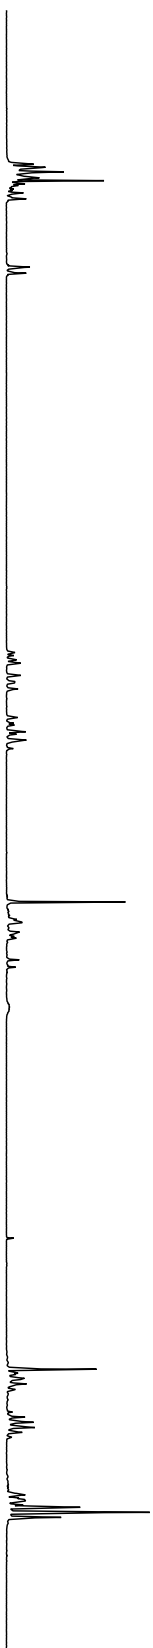

**17a** ( $^1\text{H}$ - $^{13}\text{C}$  Coupled HSQC)

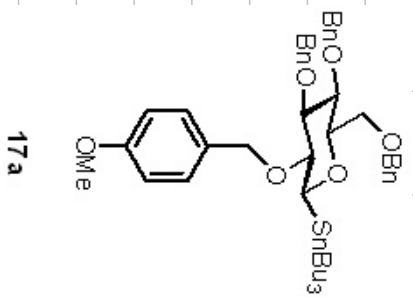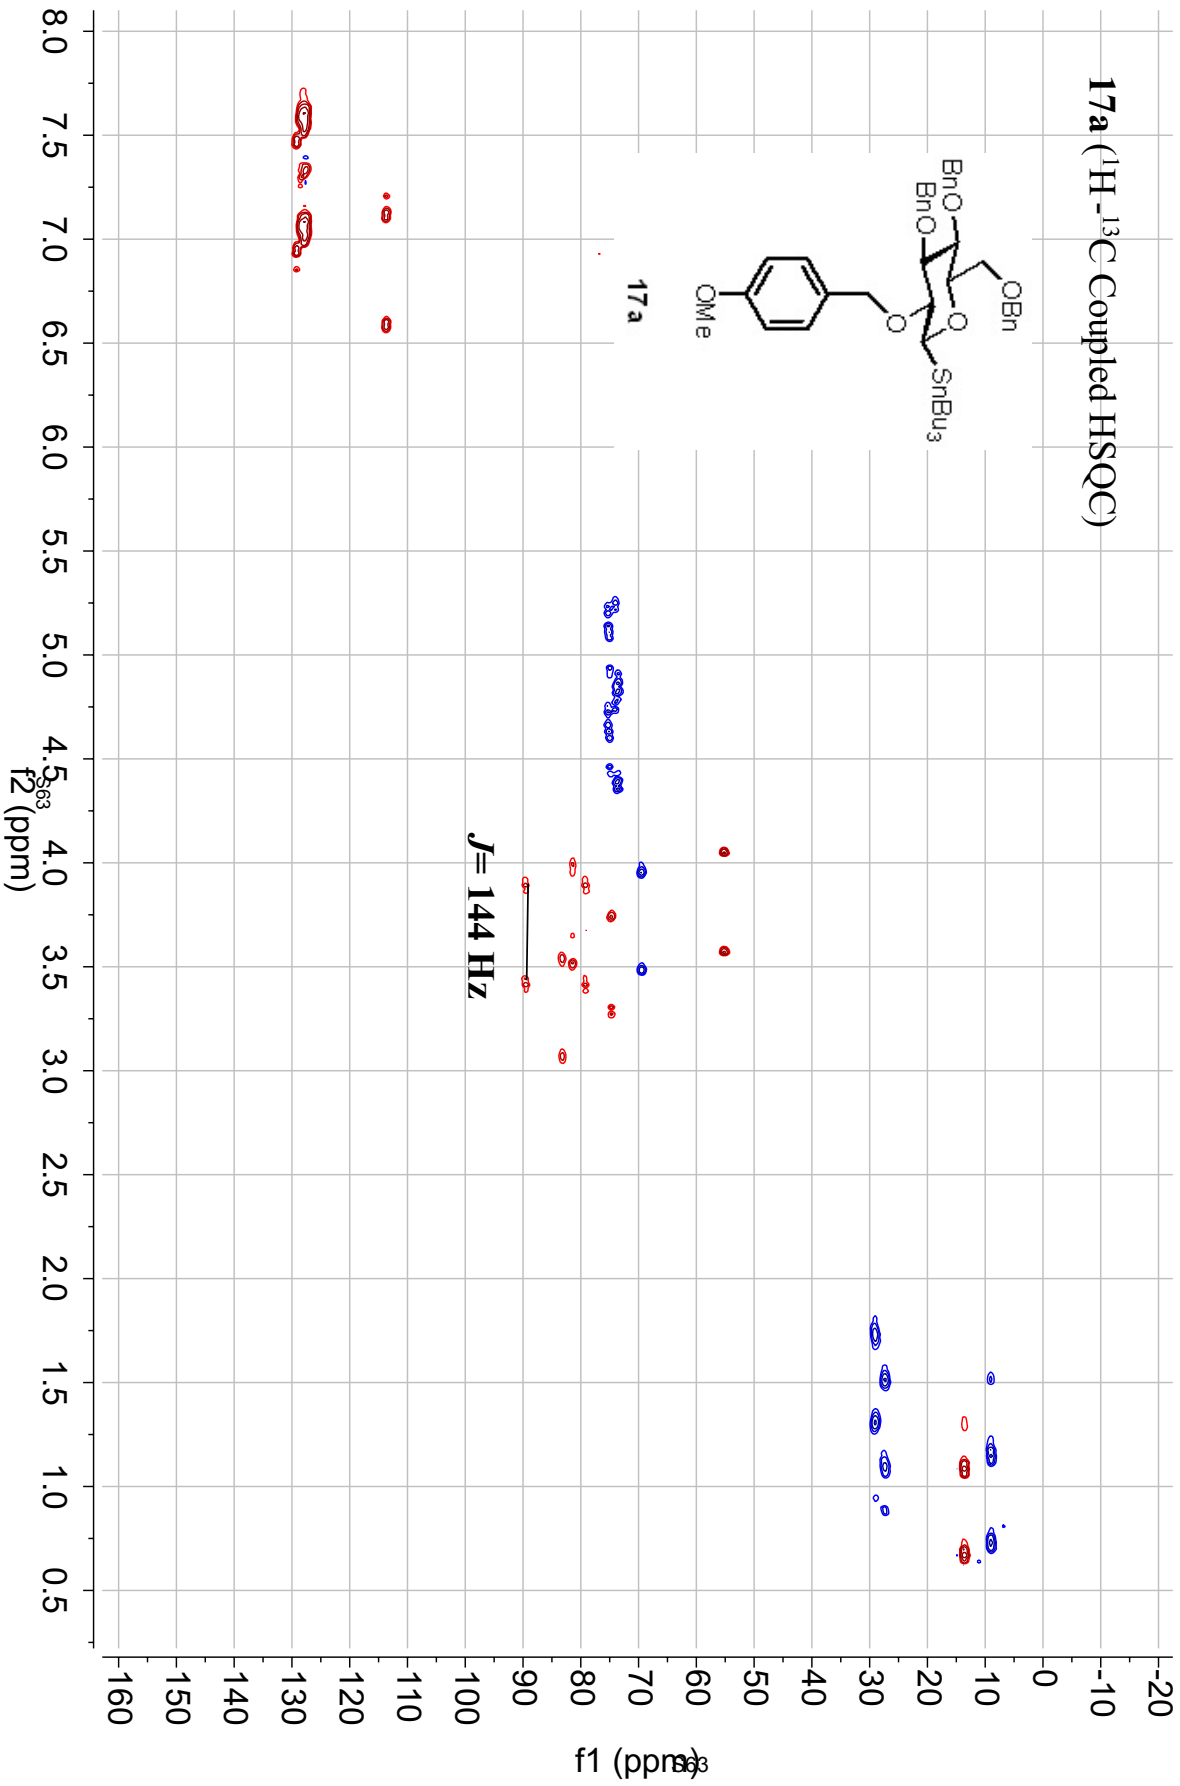

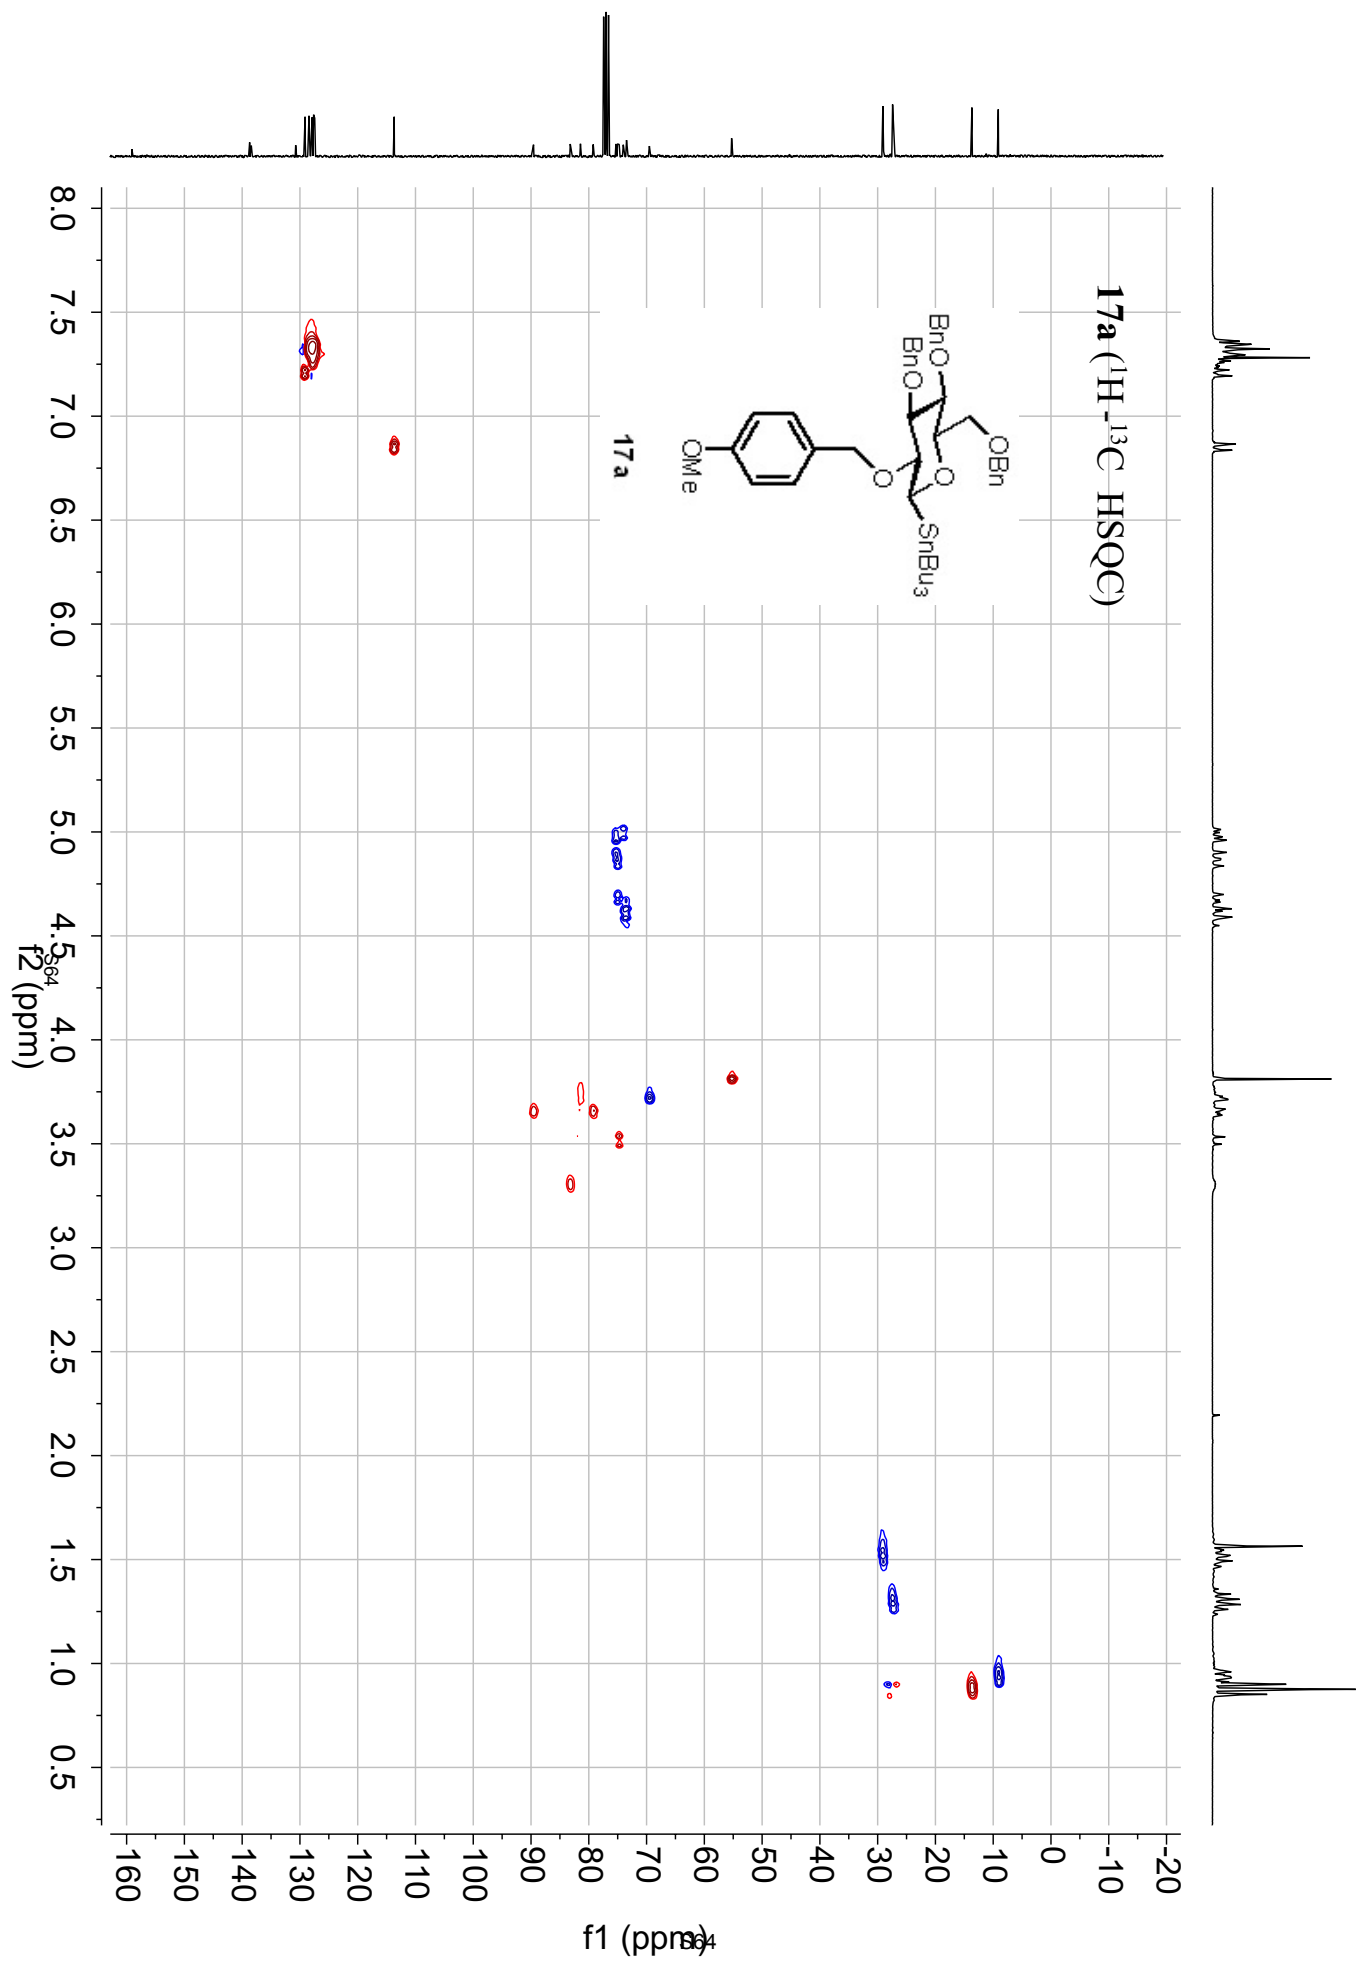



**17b** (<sup>1</sup>H NMR, 300MHz, CDCl<sub>3</sub>)

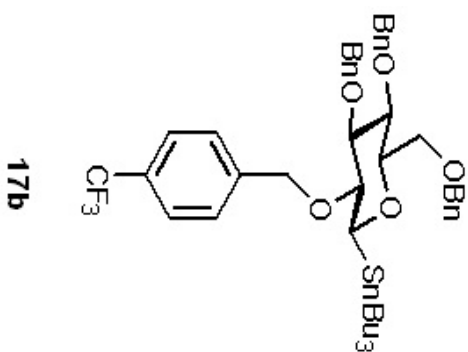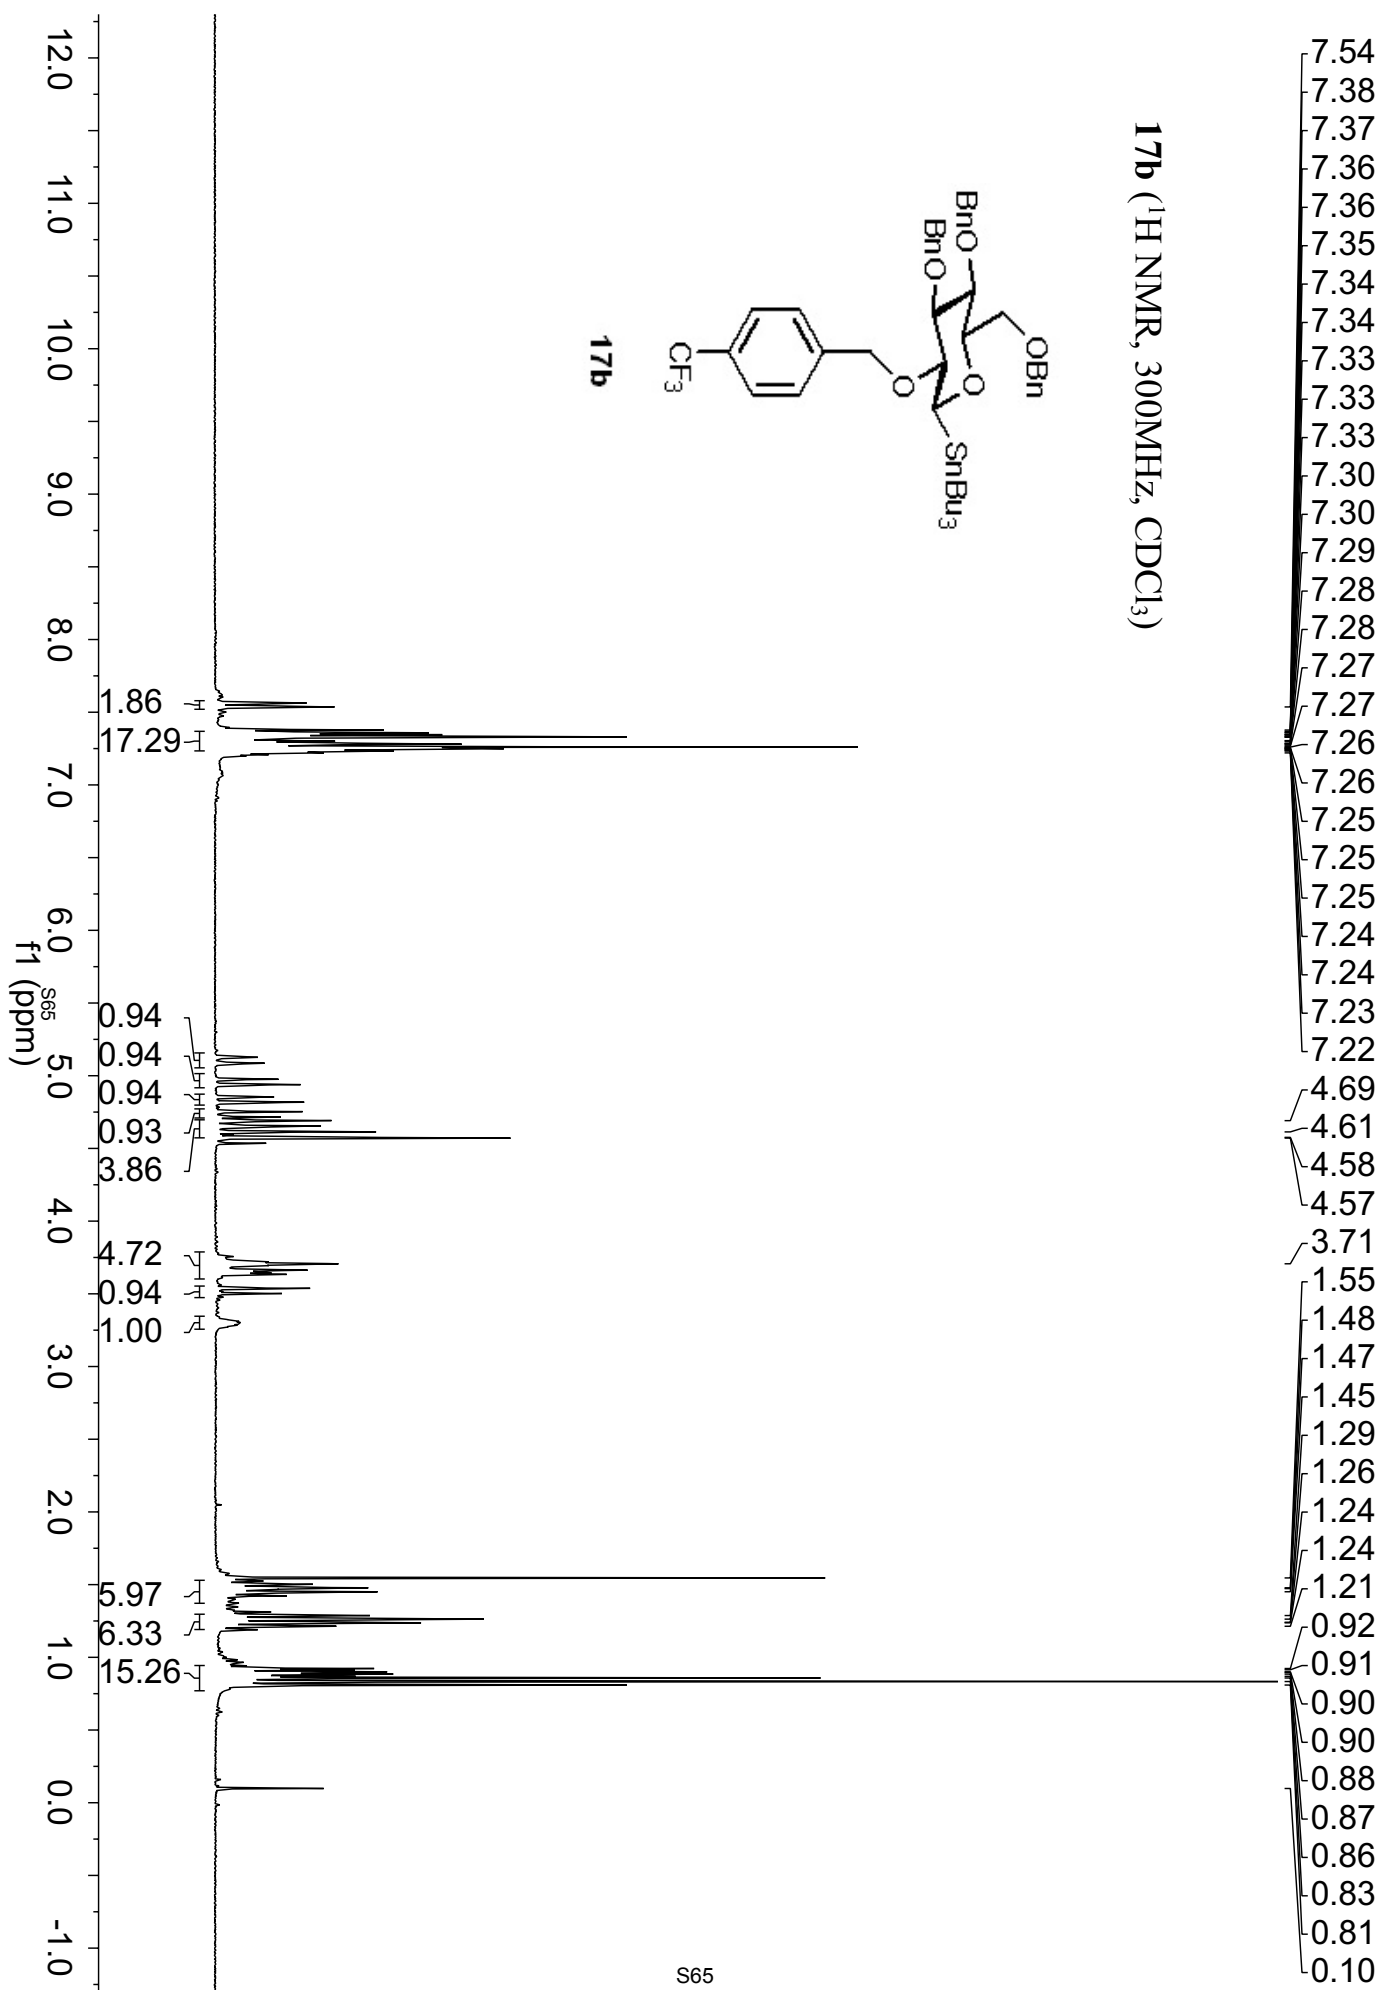

**17b** (<sup>13</sup>C NMR, 75MHz, CDCl<sub>3</sub>)

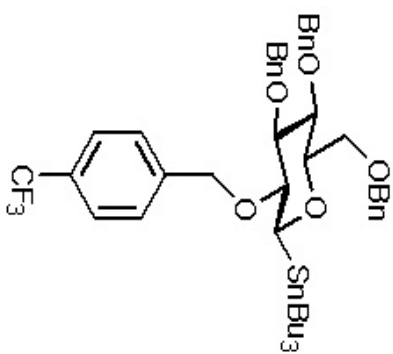

**17b**

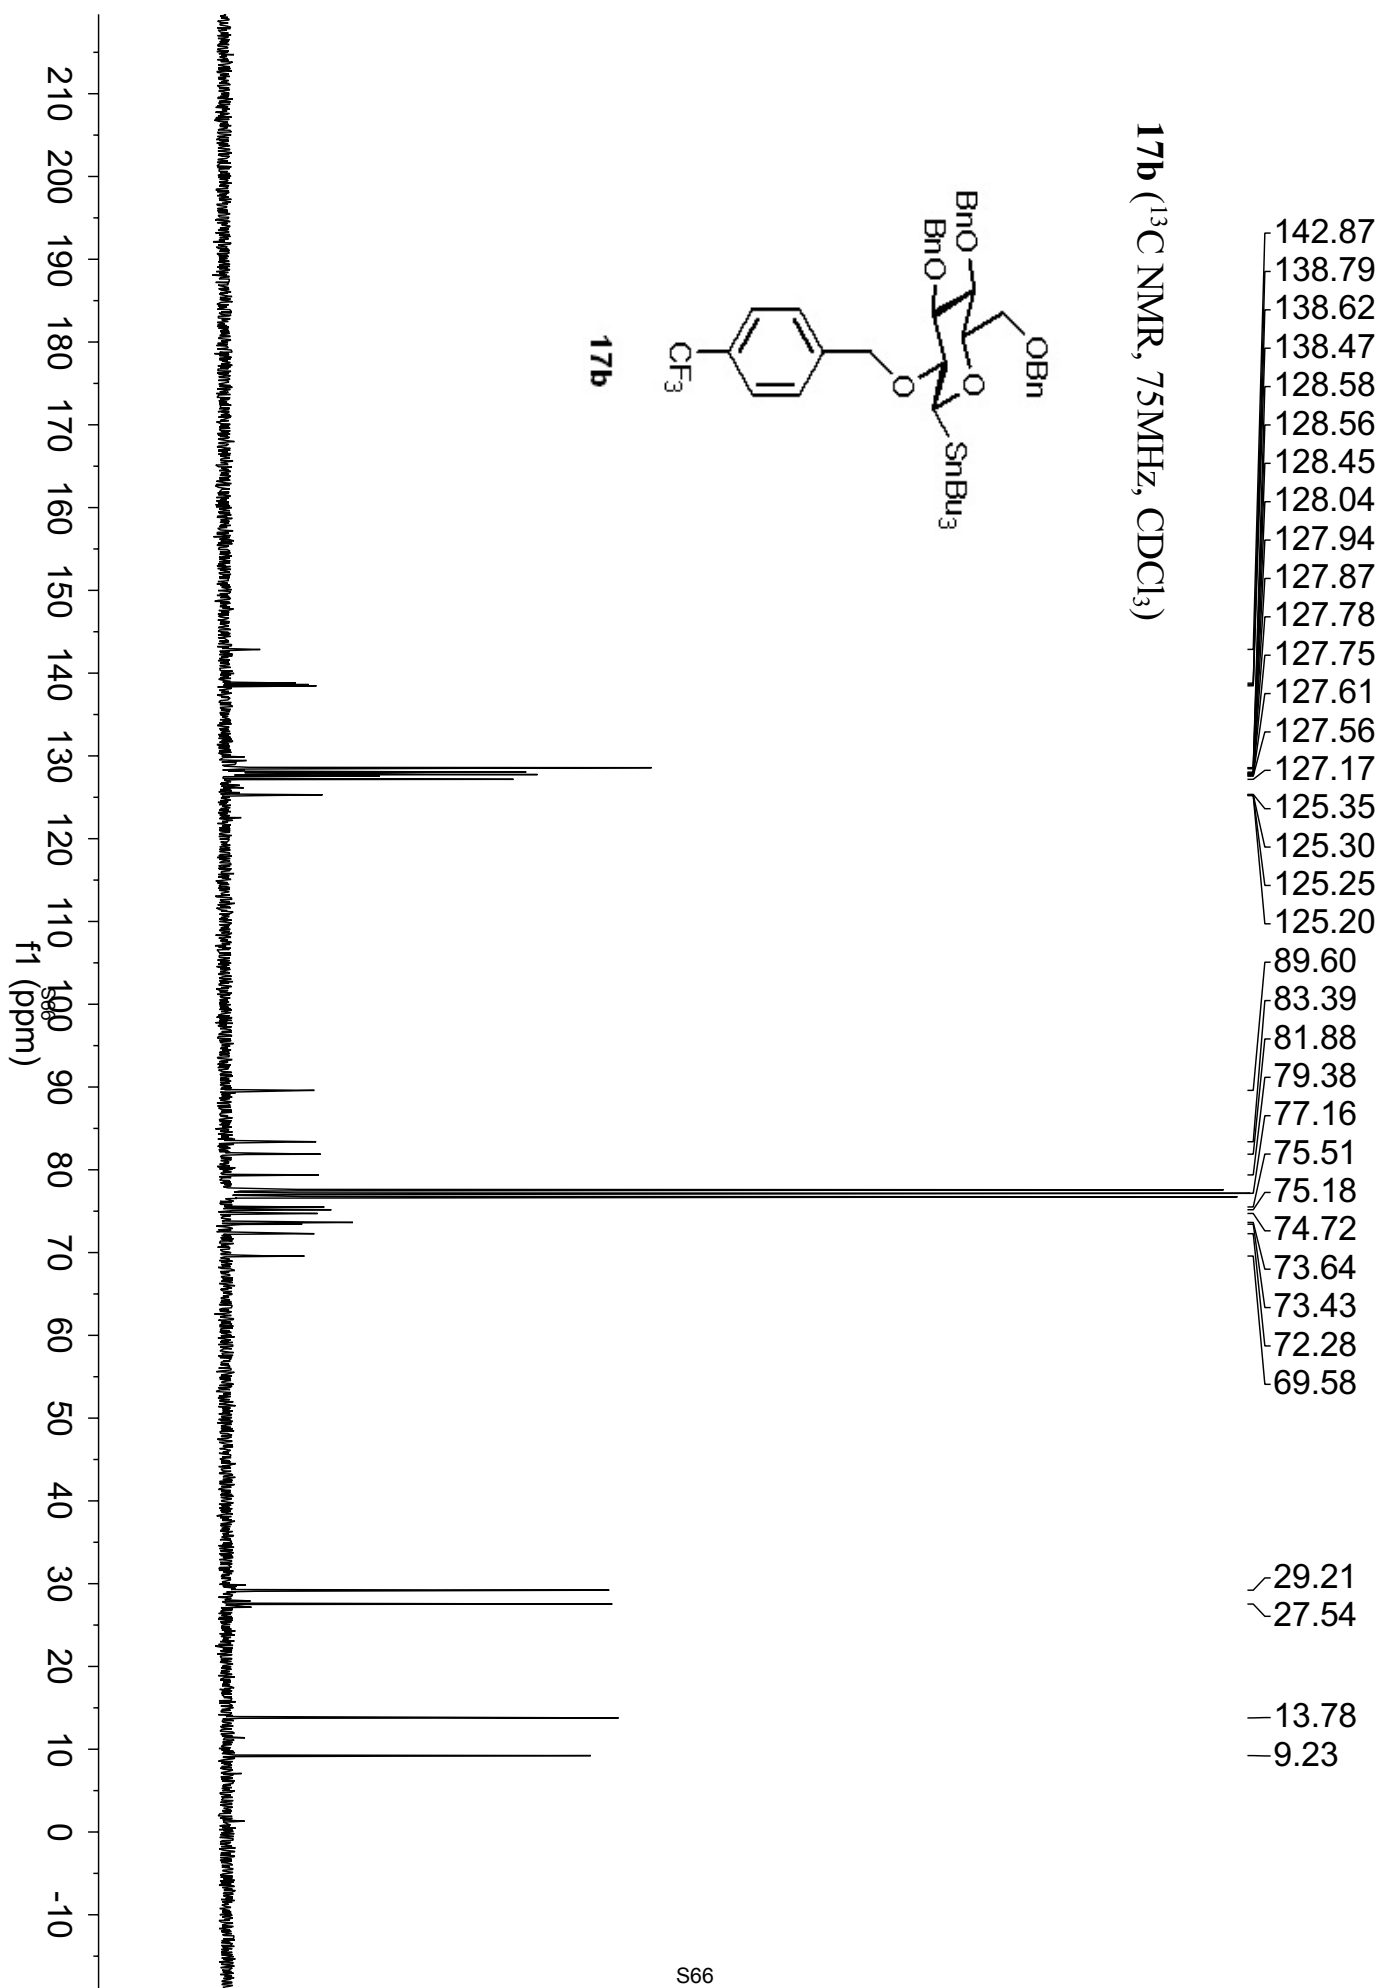



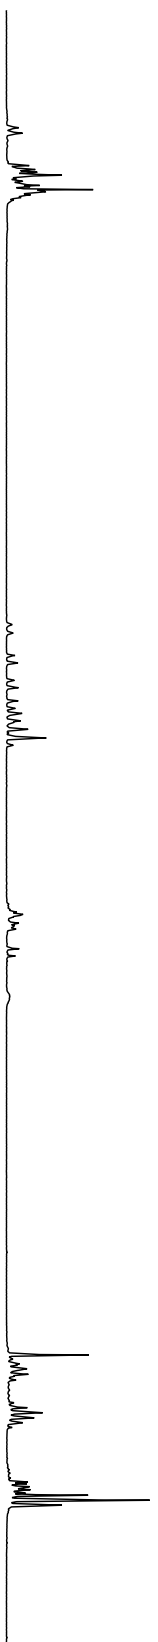

**17b** ( $^1\text{H}$ - $^{13}\text{C}$  HSQC)

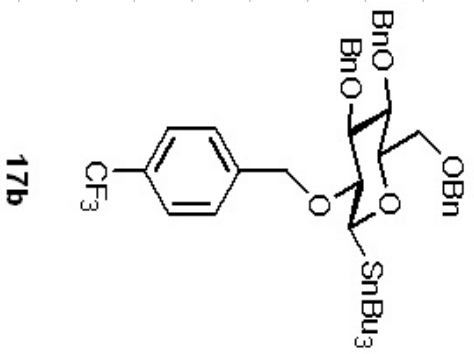

**17b**

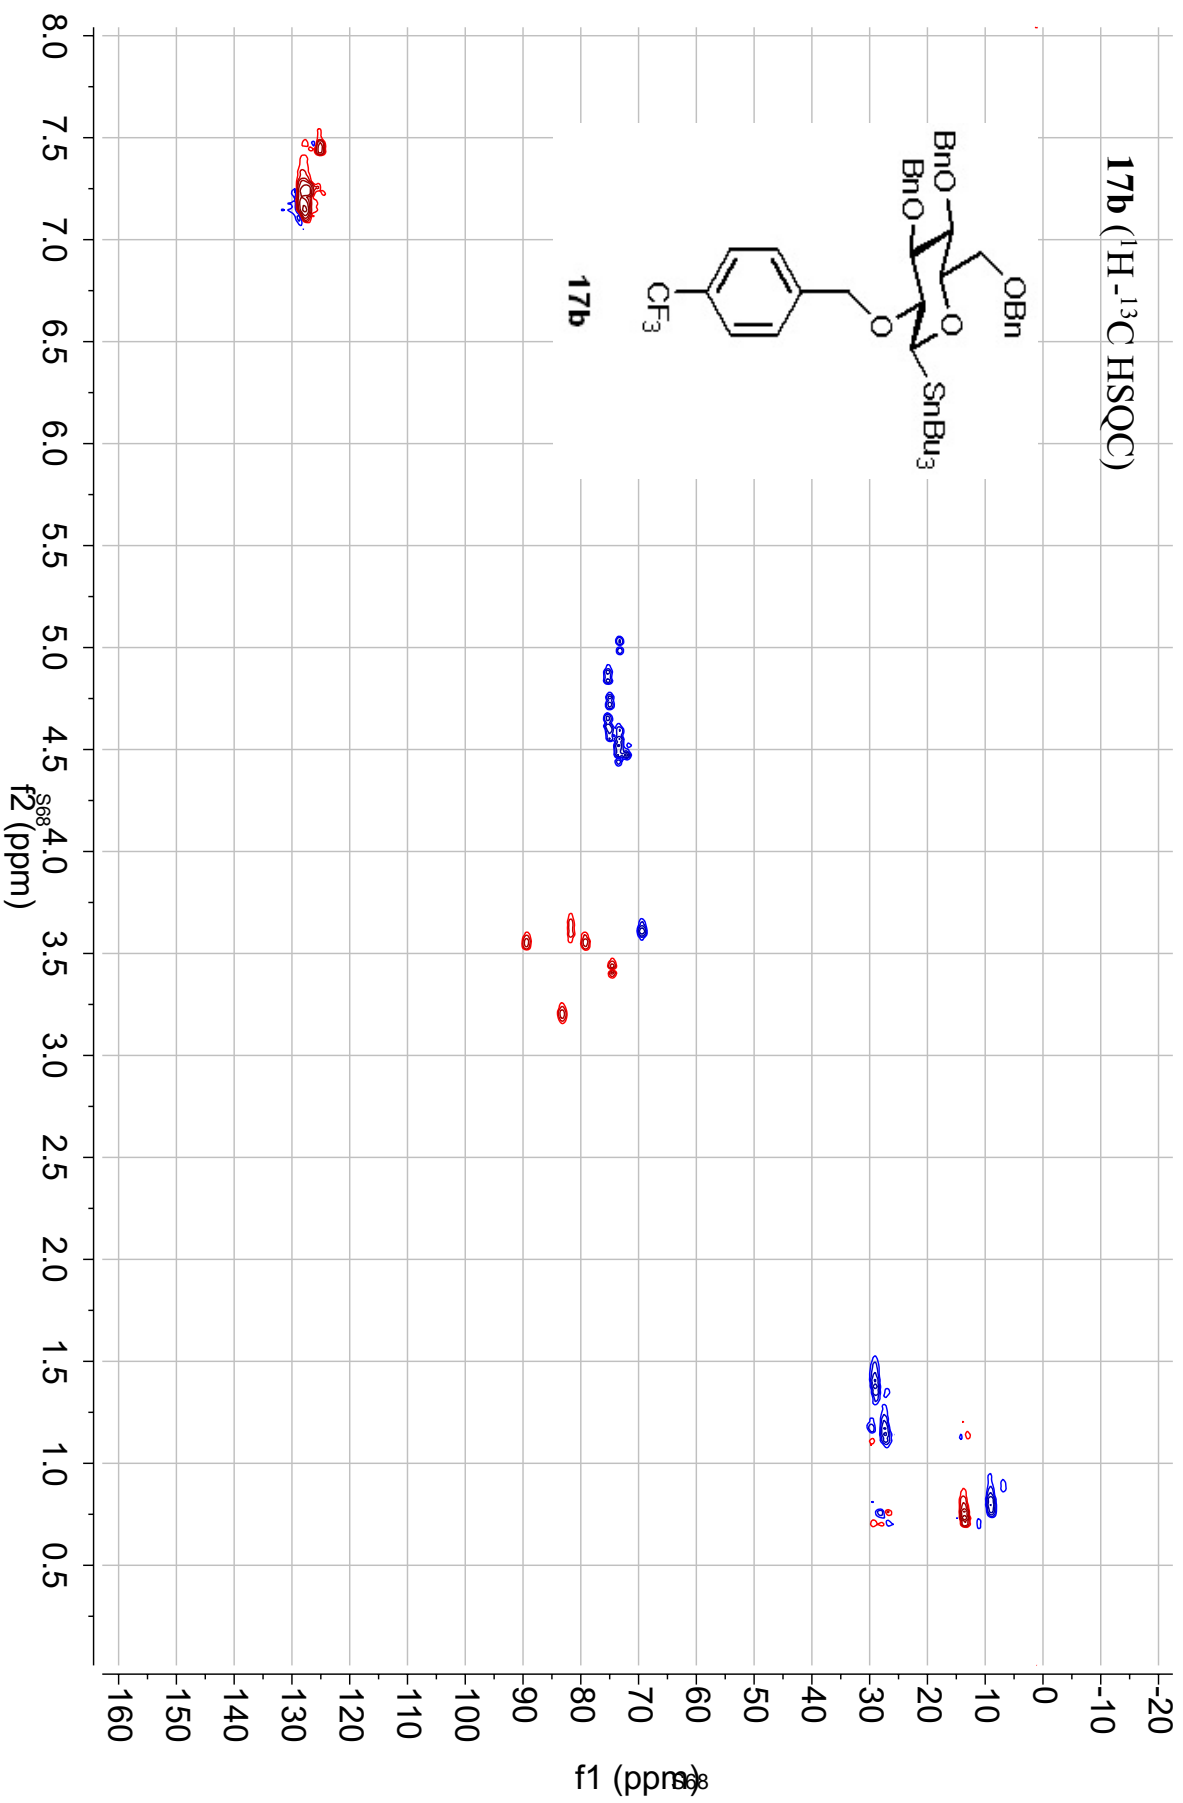

**17b** ( $^{19}\text{F}$  NMR, 282 MHz,  $\text{CDCl}_3$ )

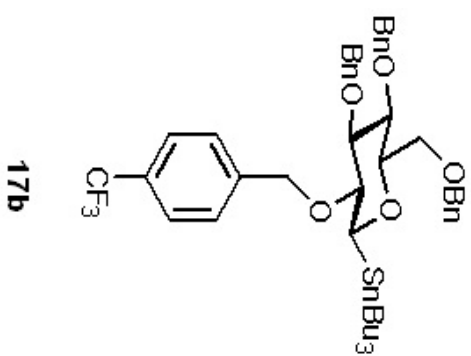

**17b**

-62.49

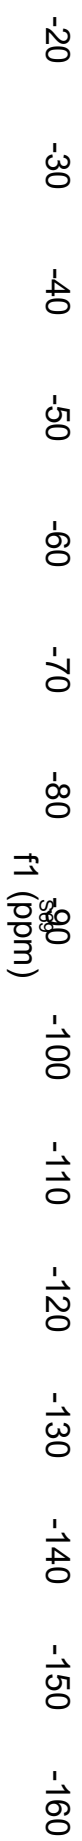

17c (<sup>1</sup>H NMR, 300MHz, CDCl<sub>3</sub>)

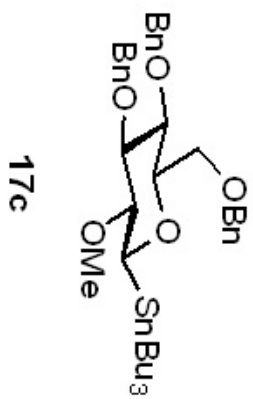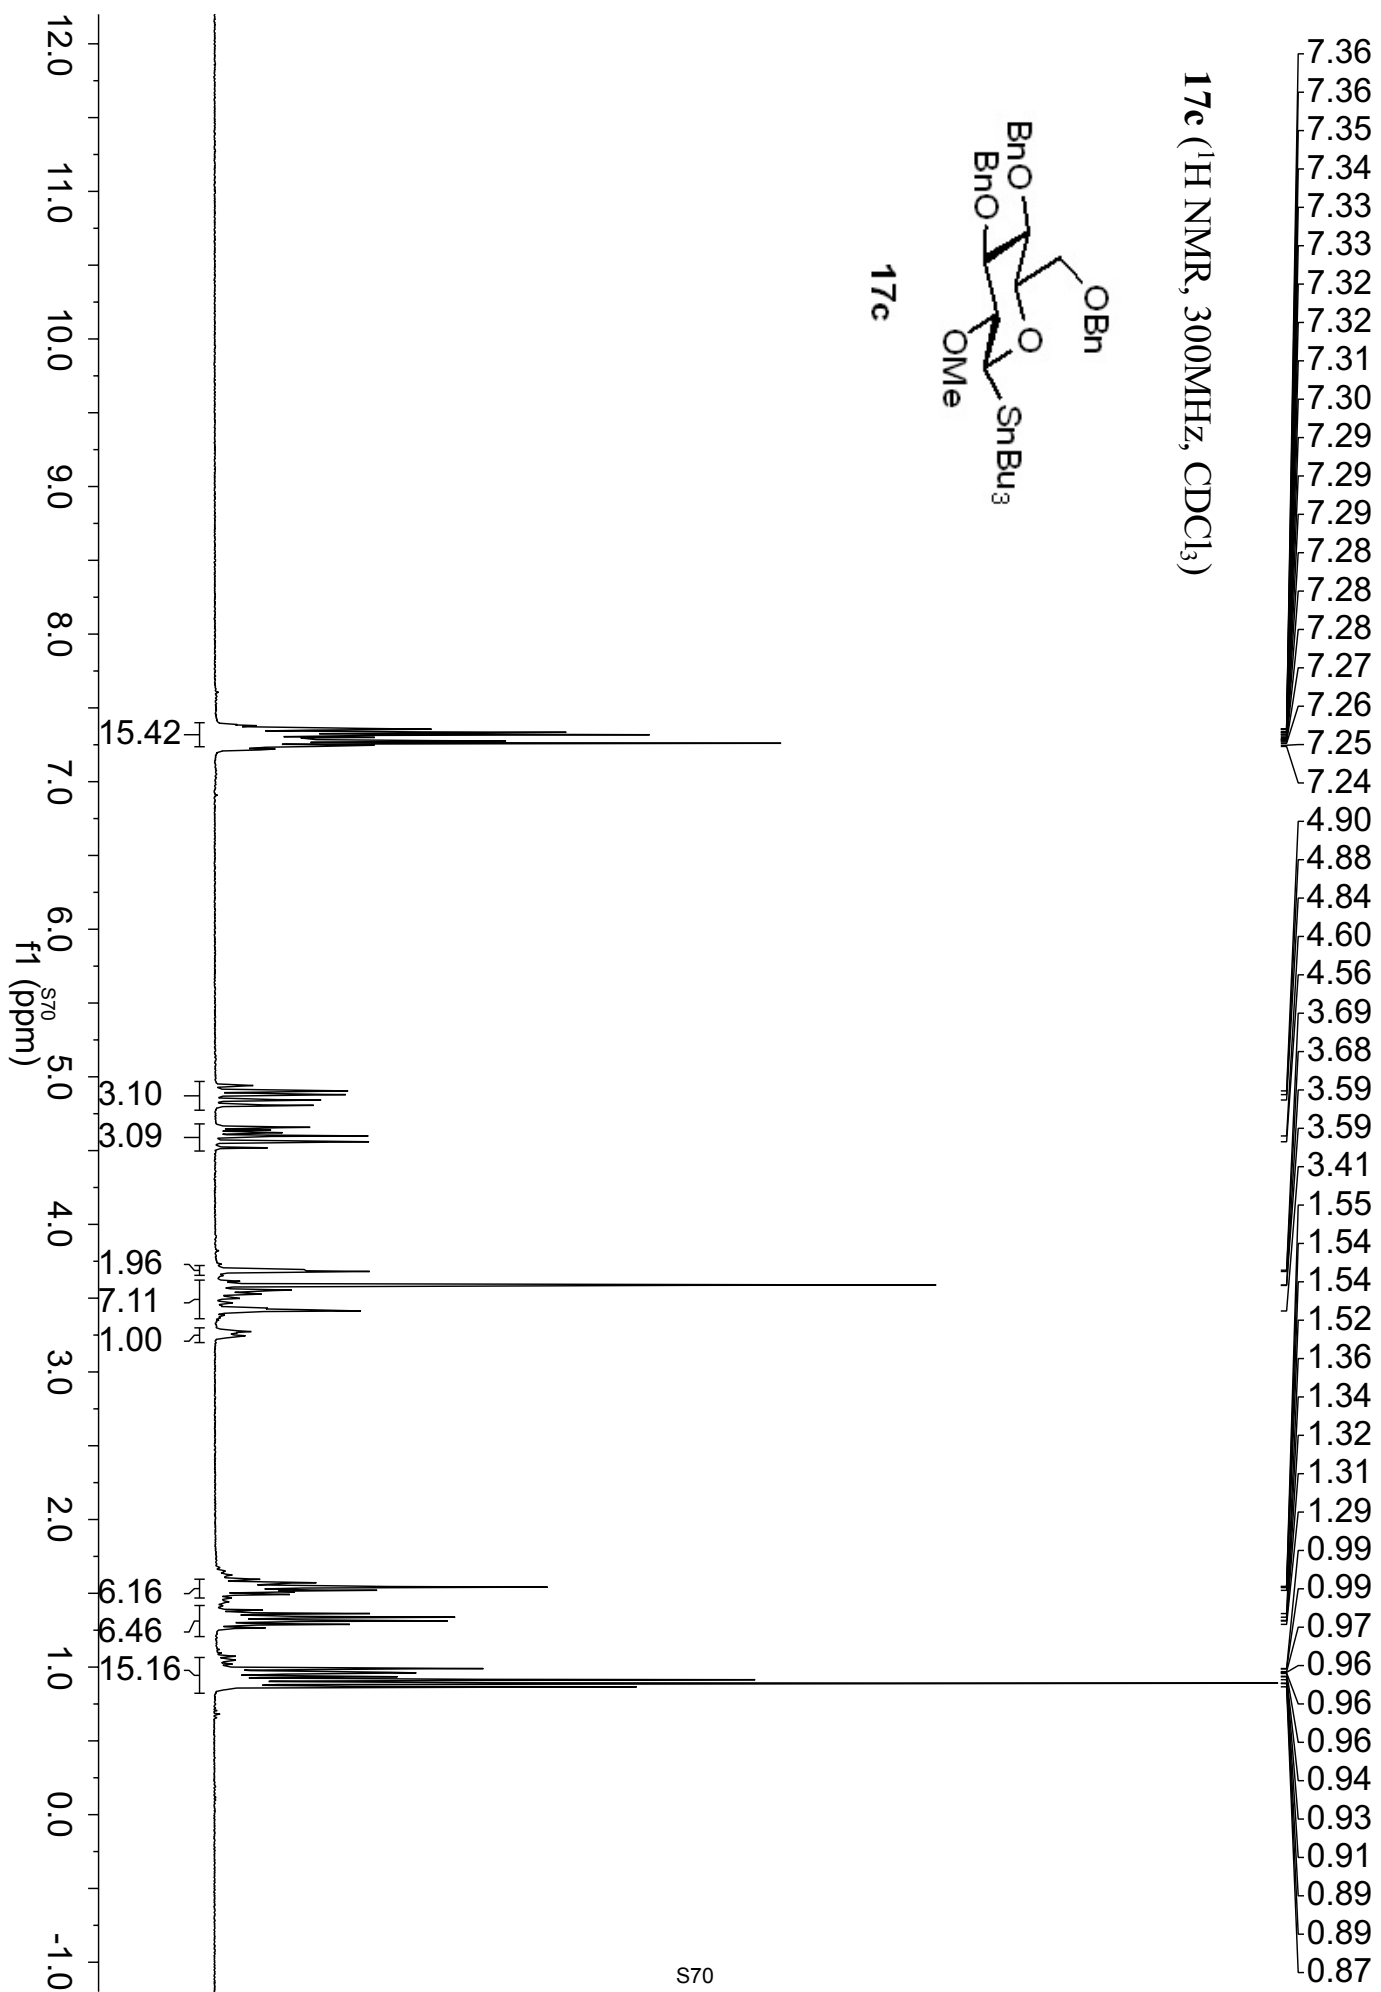

**17c** ( $^{13}\text{C}$  NMR, 75MHz,  $\text{CDCl}_3$ )

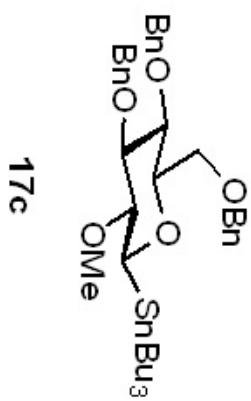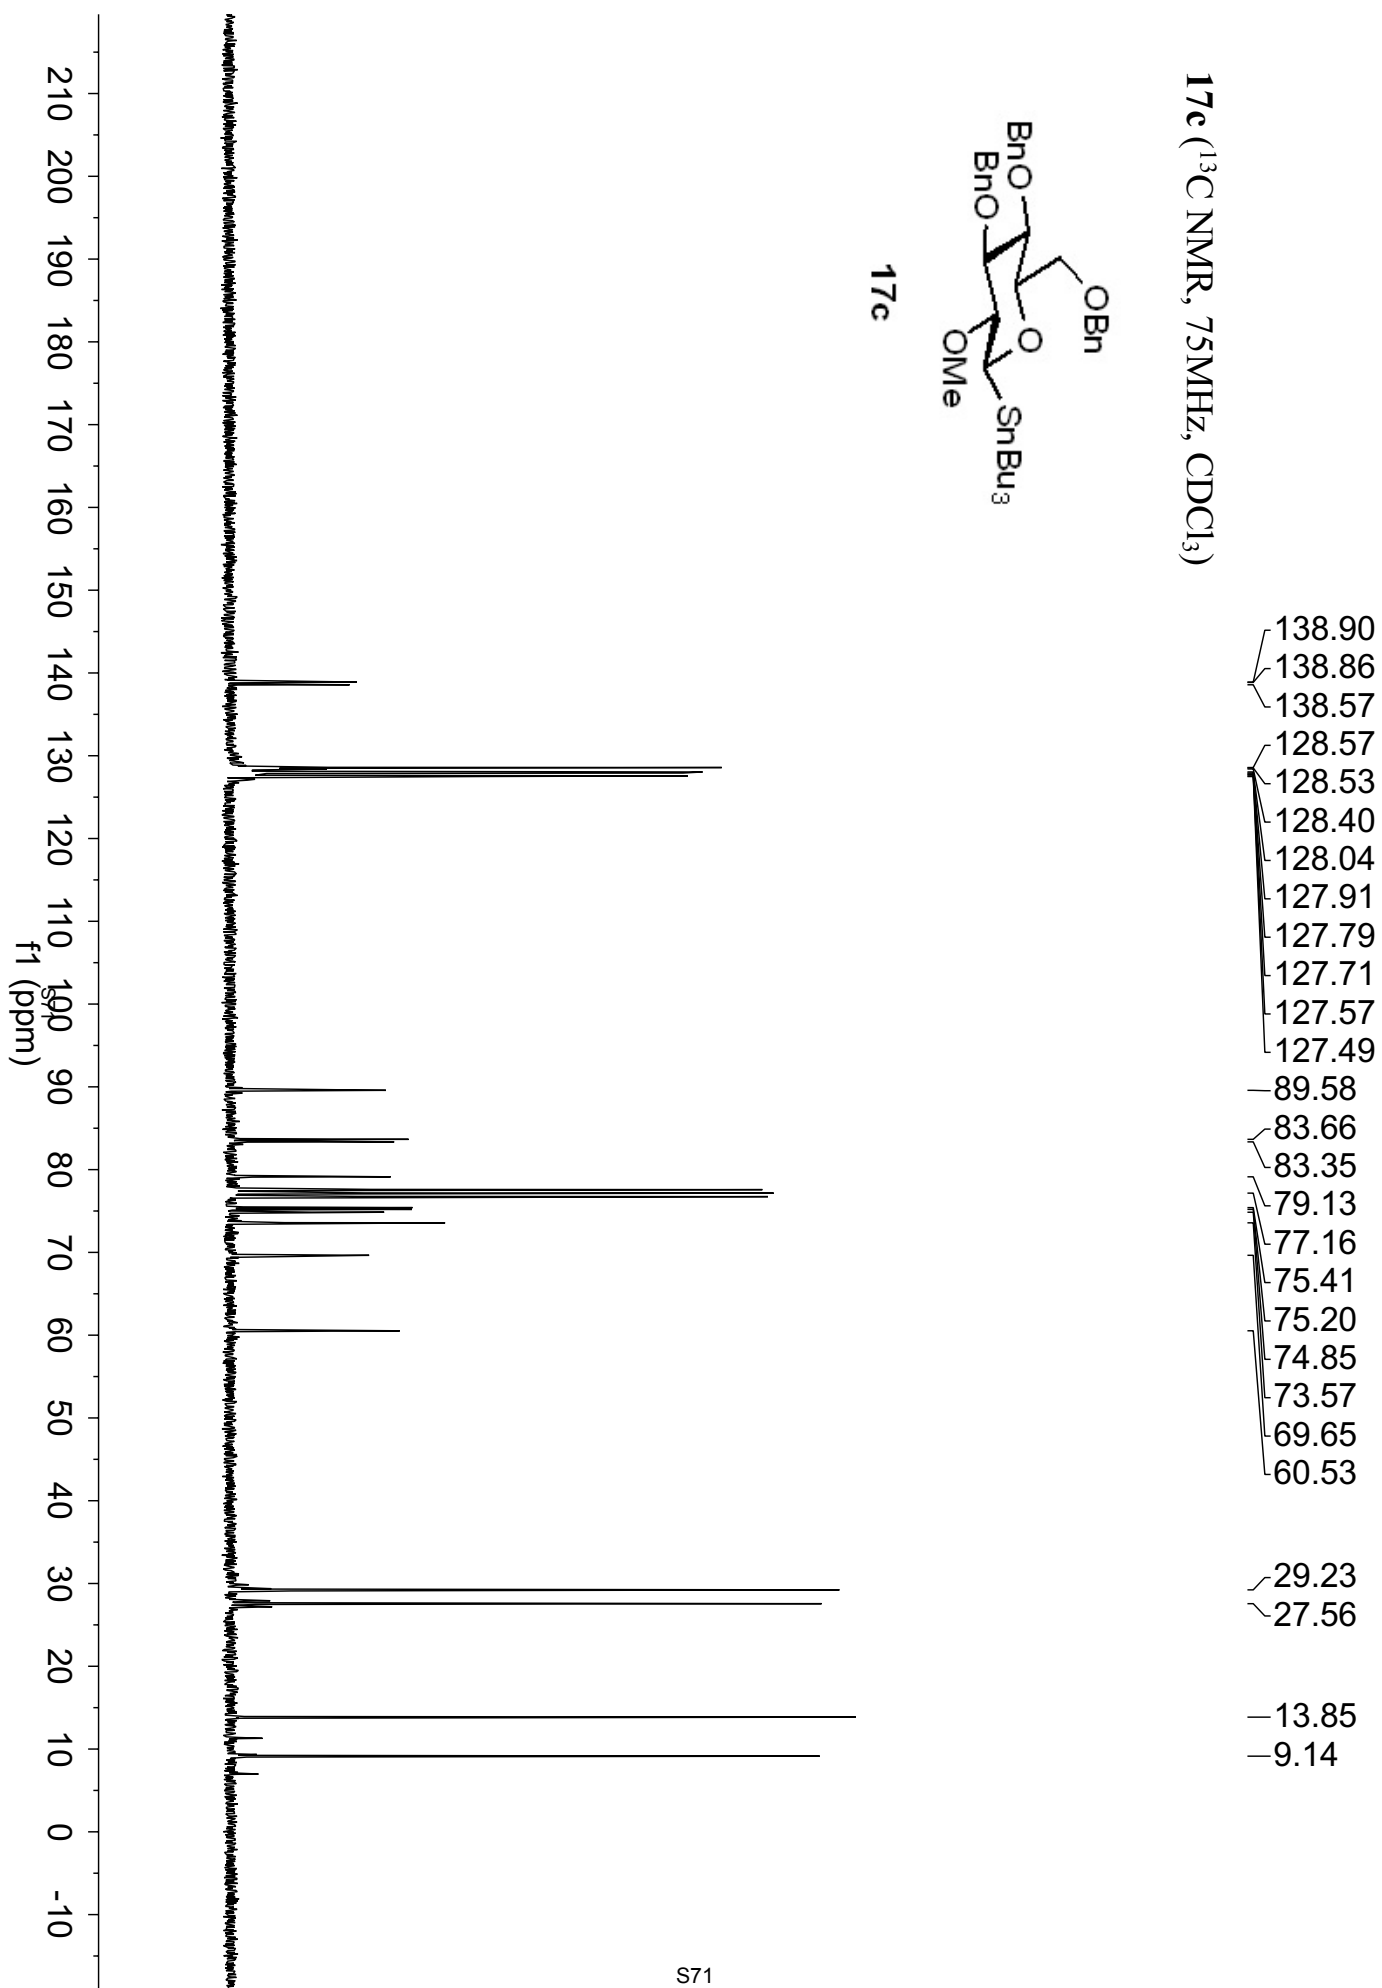

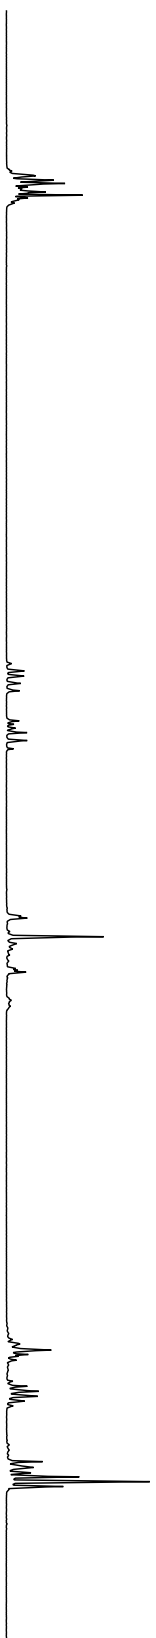

**17c** ( $^1\text{H}$ - $^{13}\text{C}$  Coupled HSQC)

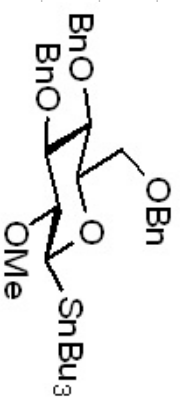

**17c**

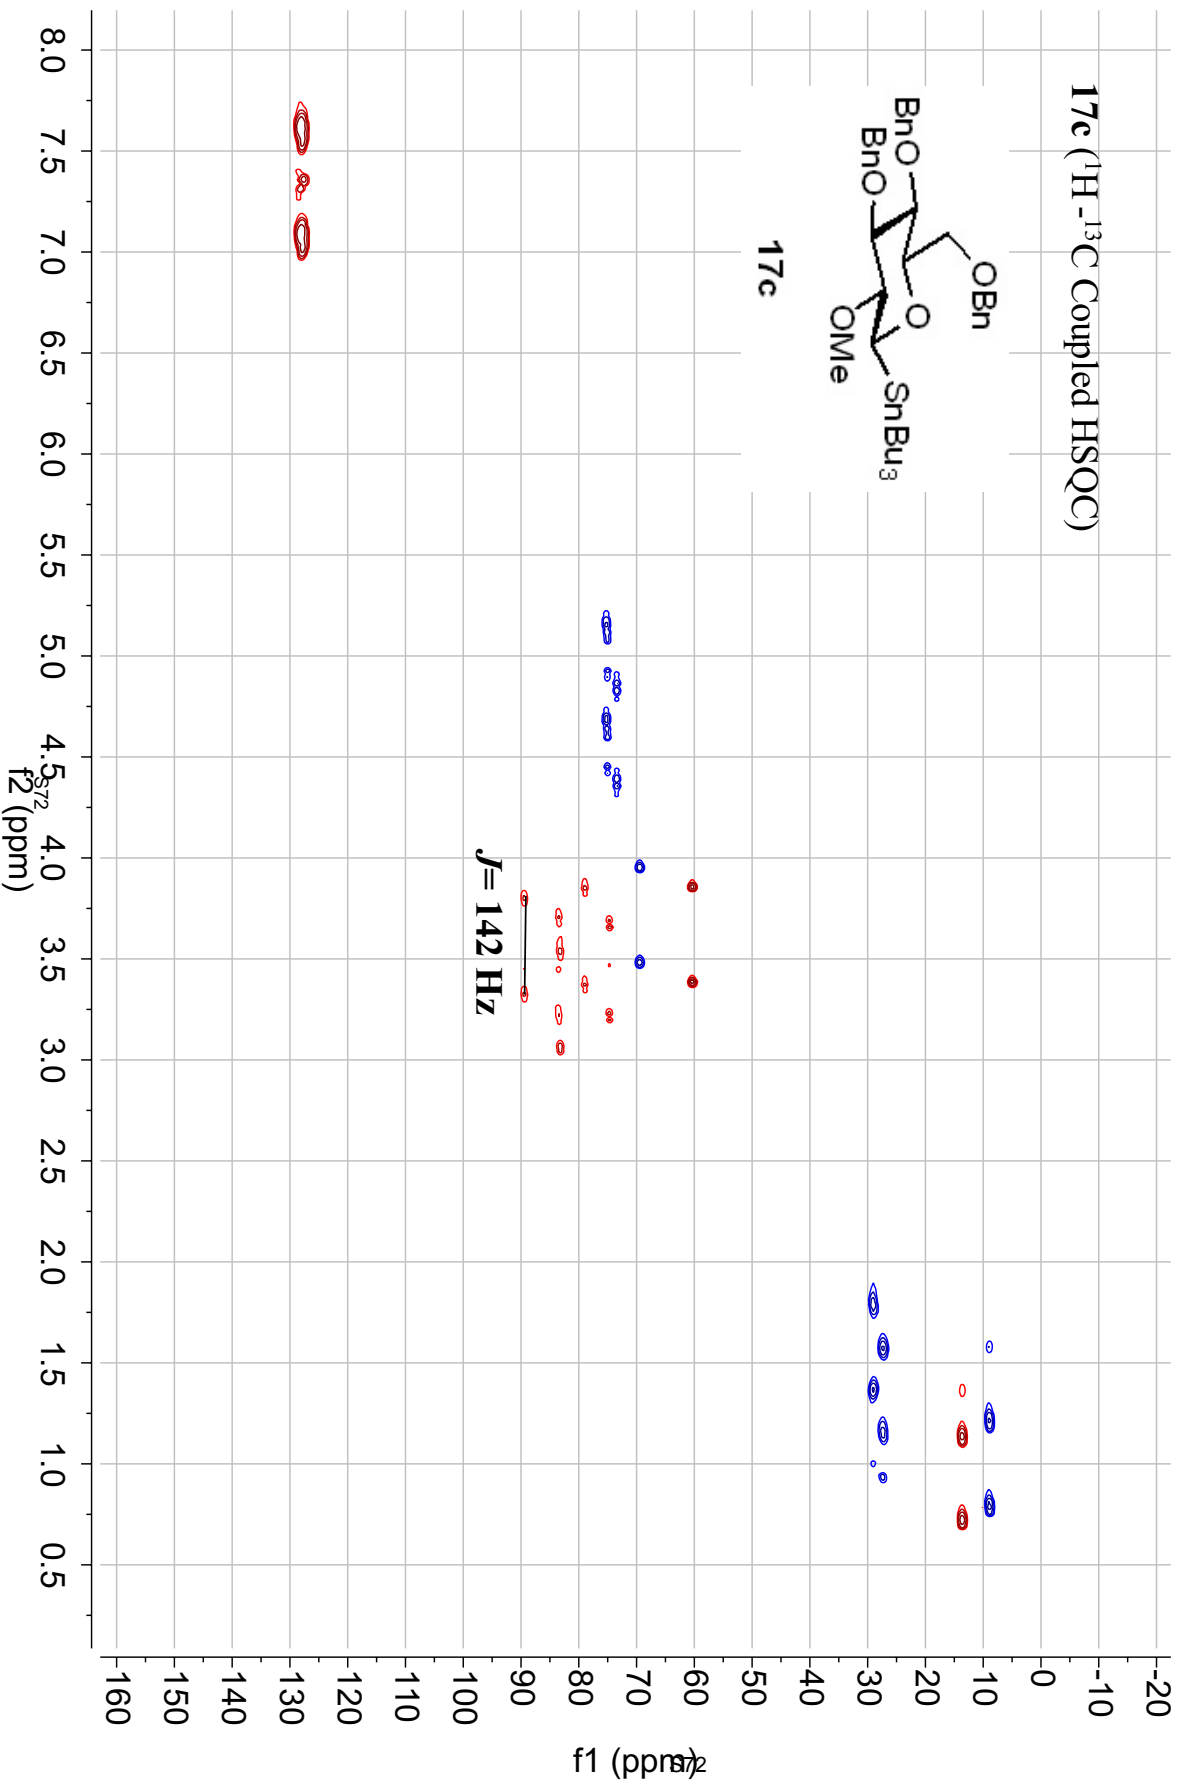



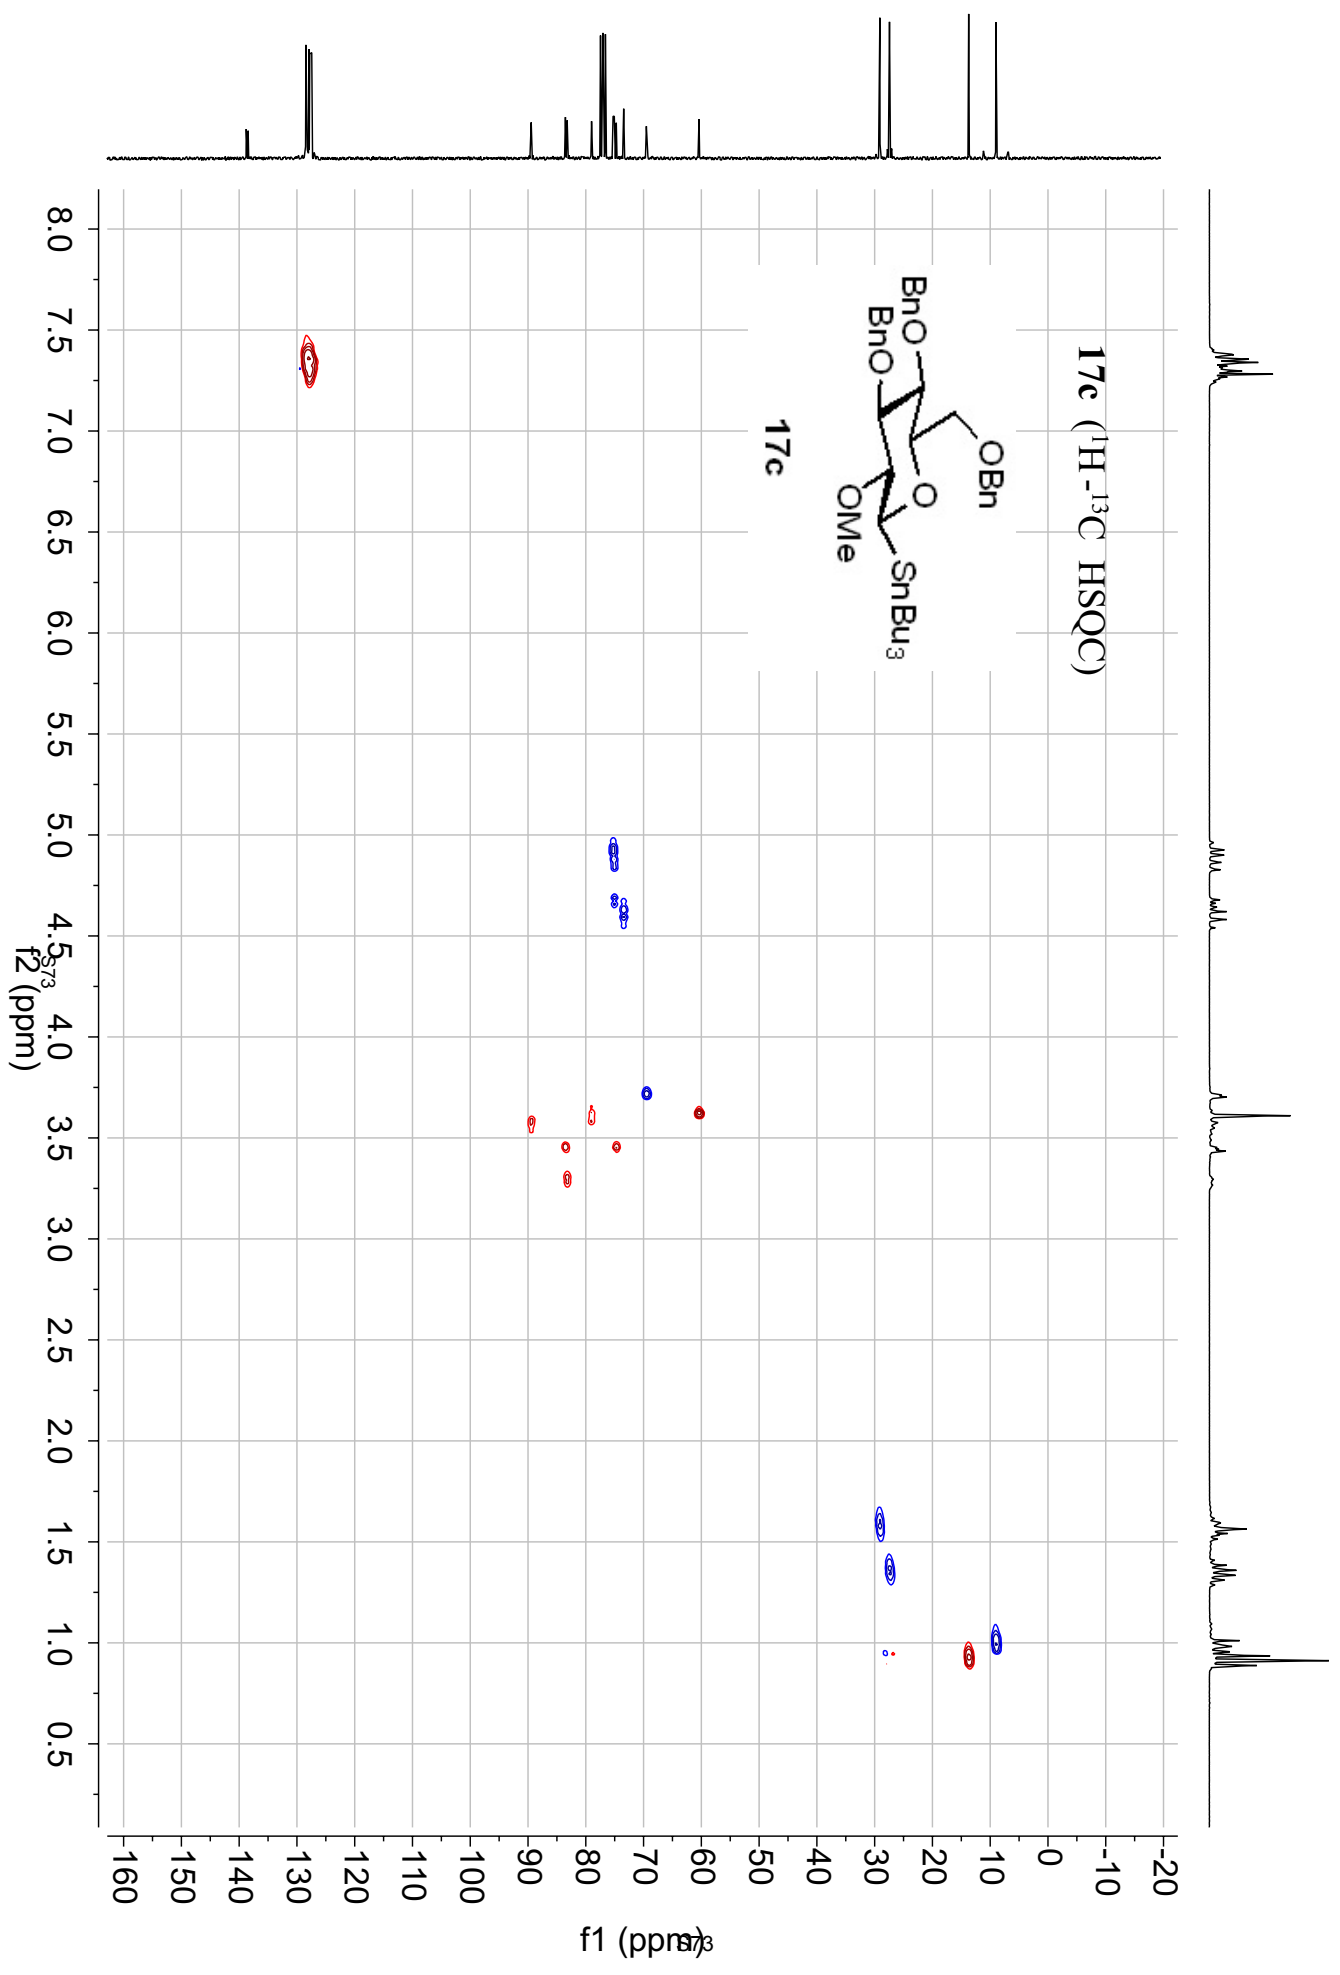



**21a** ( $^{13}\text{C}$  NMR, 75MHz,  $\text{CDCl}_3$ )

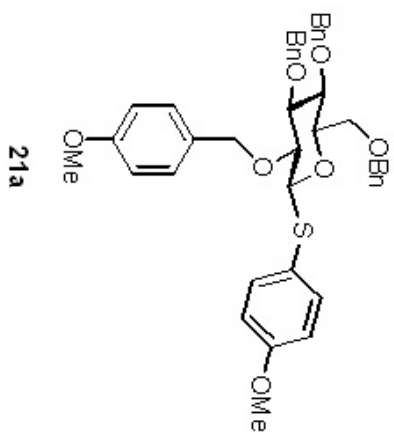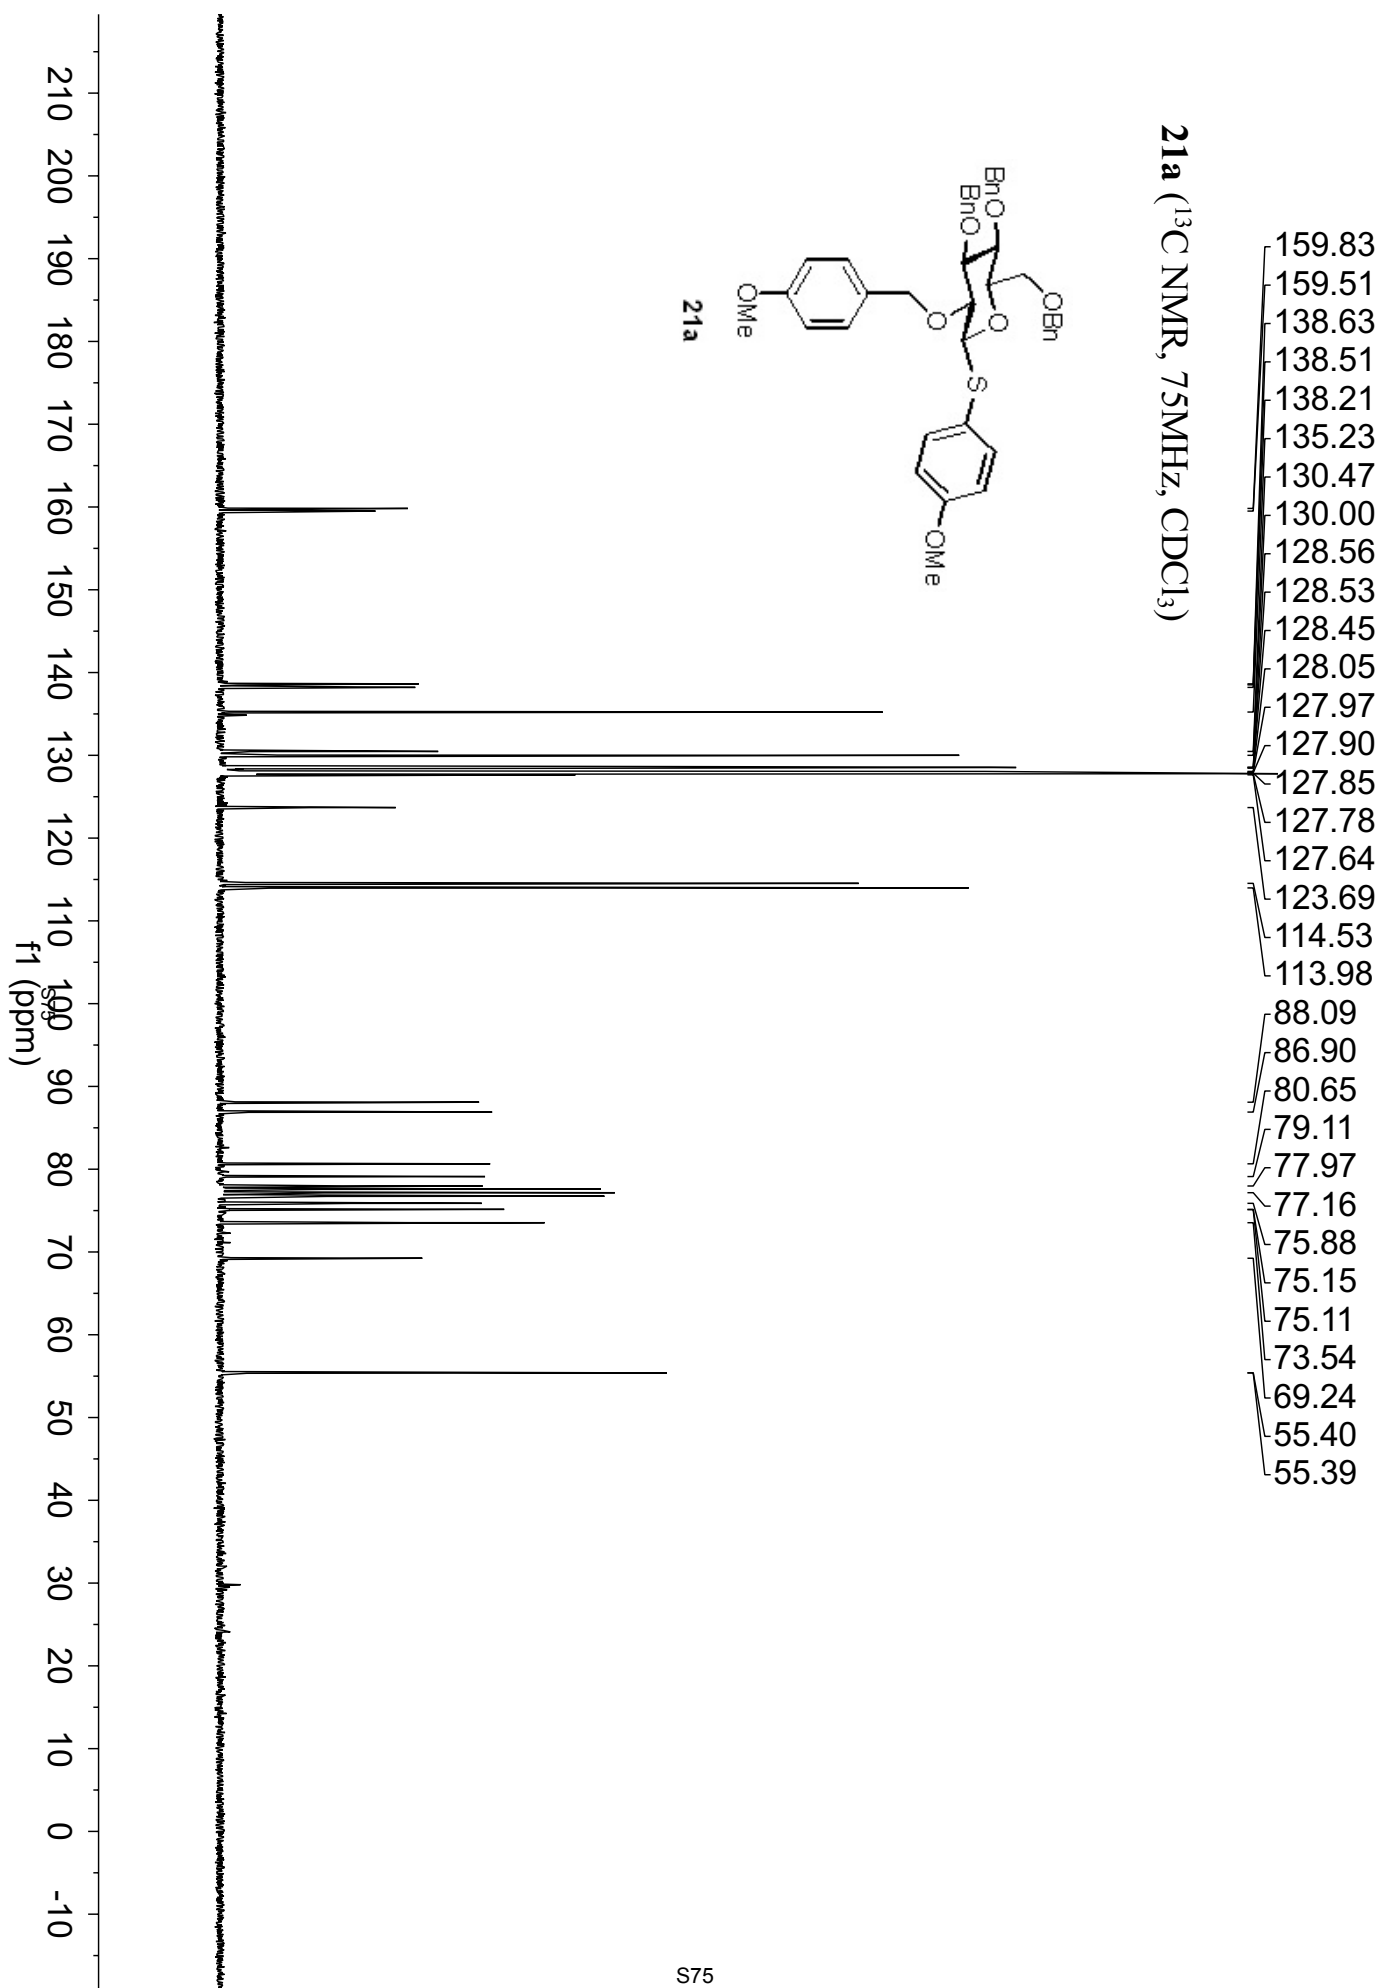

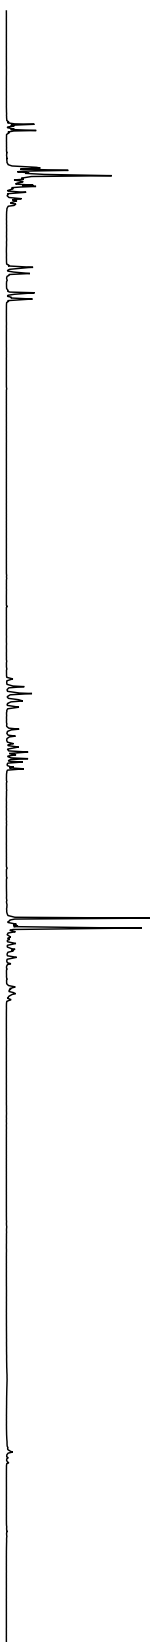

**21a** ( $^1\text{H}$ - $^{13}\text{C}$  Coupled HSQC)

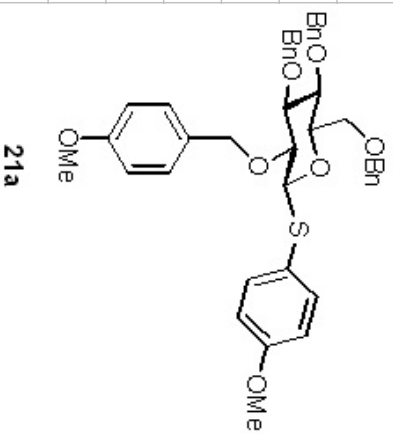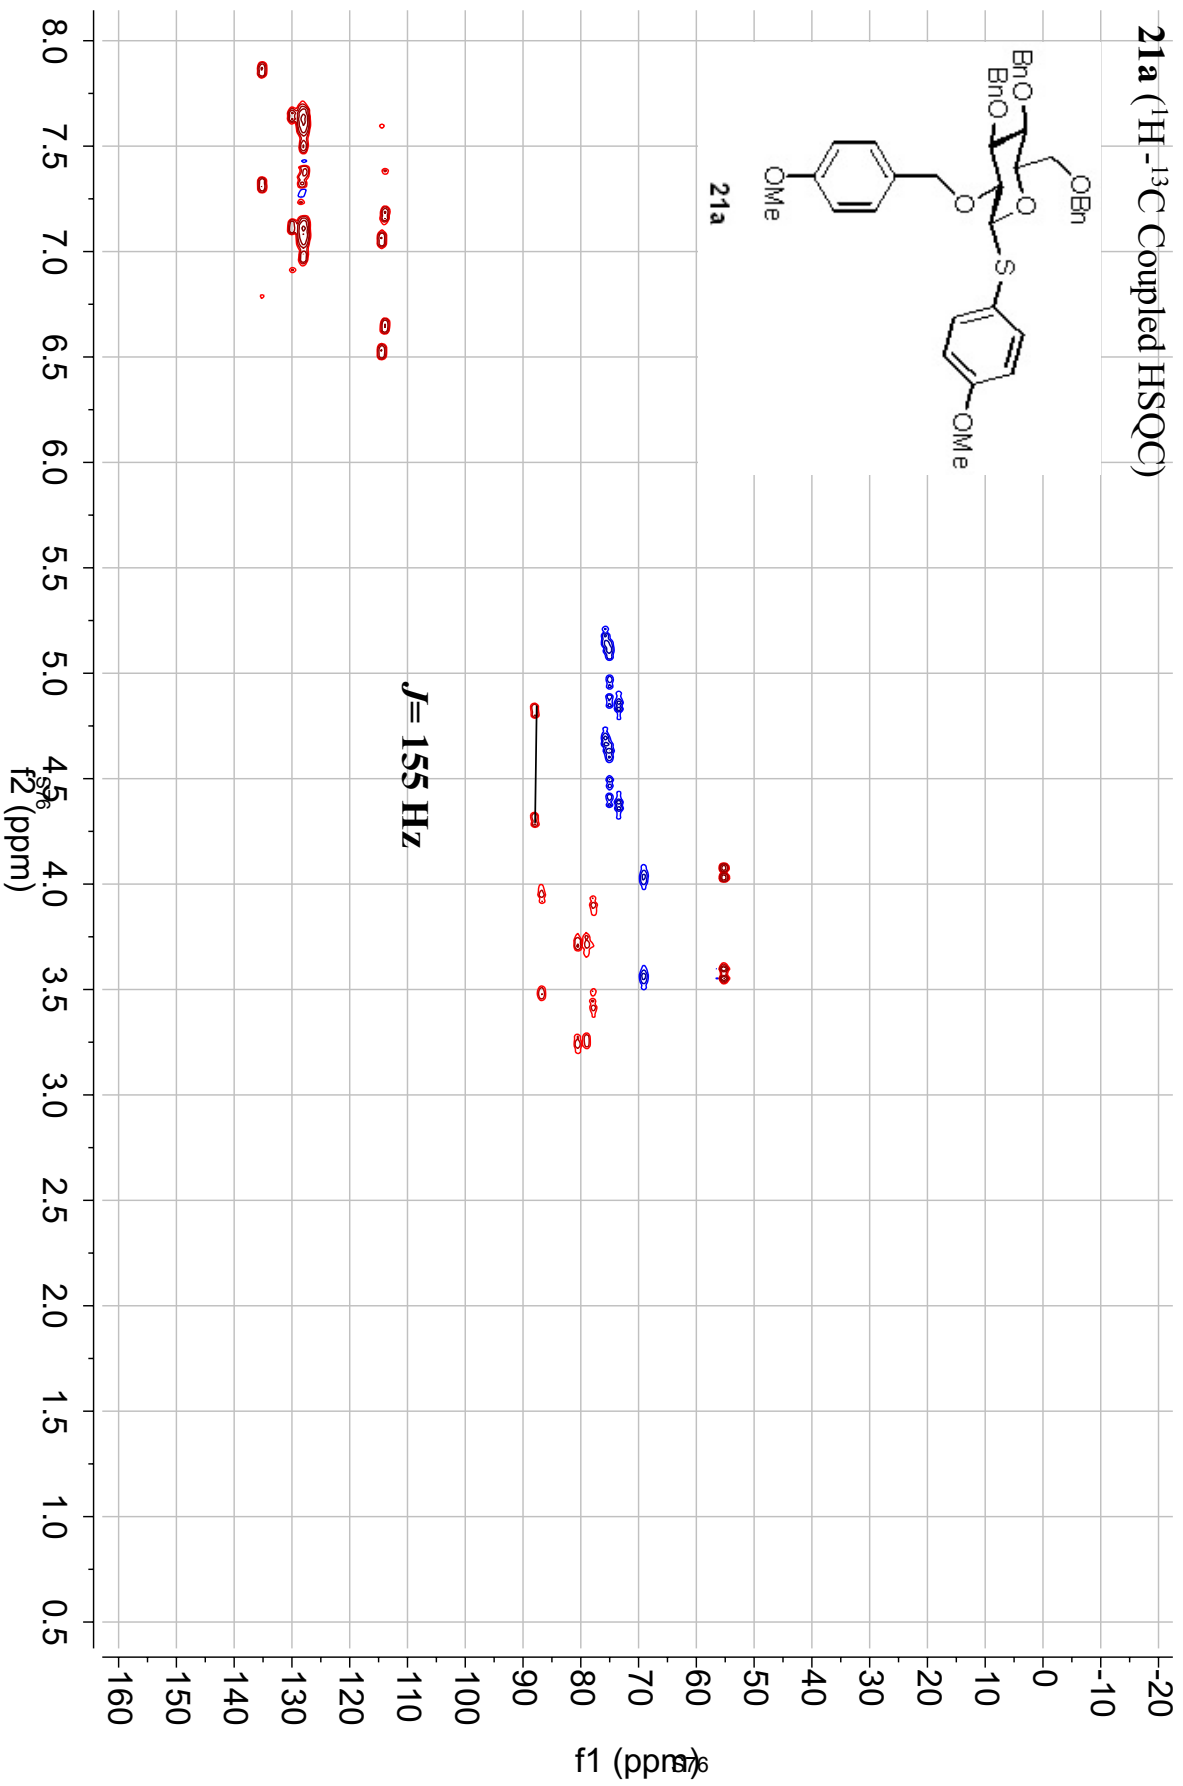

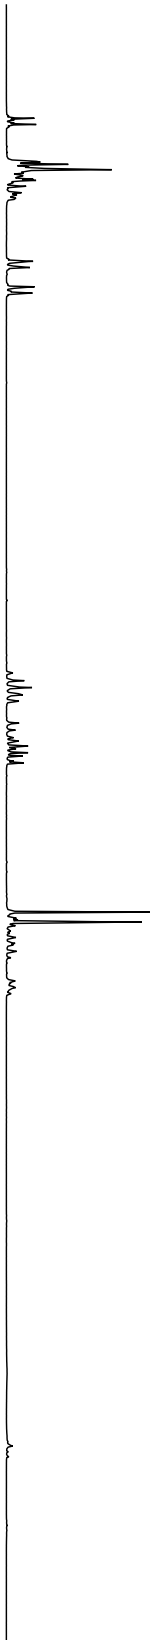

**21a** ( $^1\text{H}$ - $^{13}\text{C}$  HSQC)

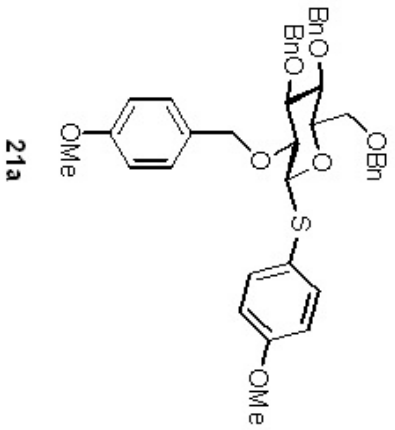

21a

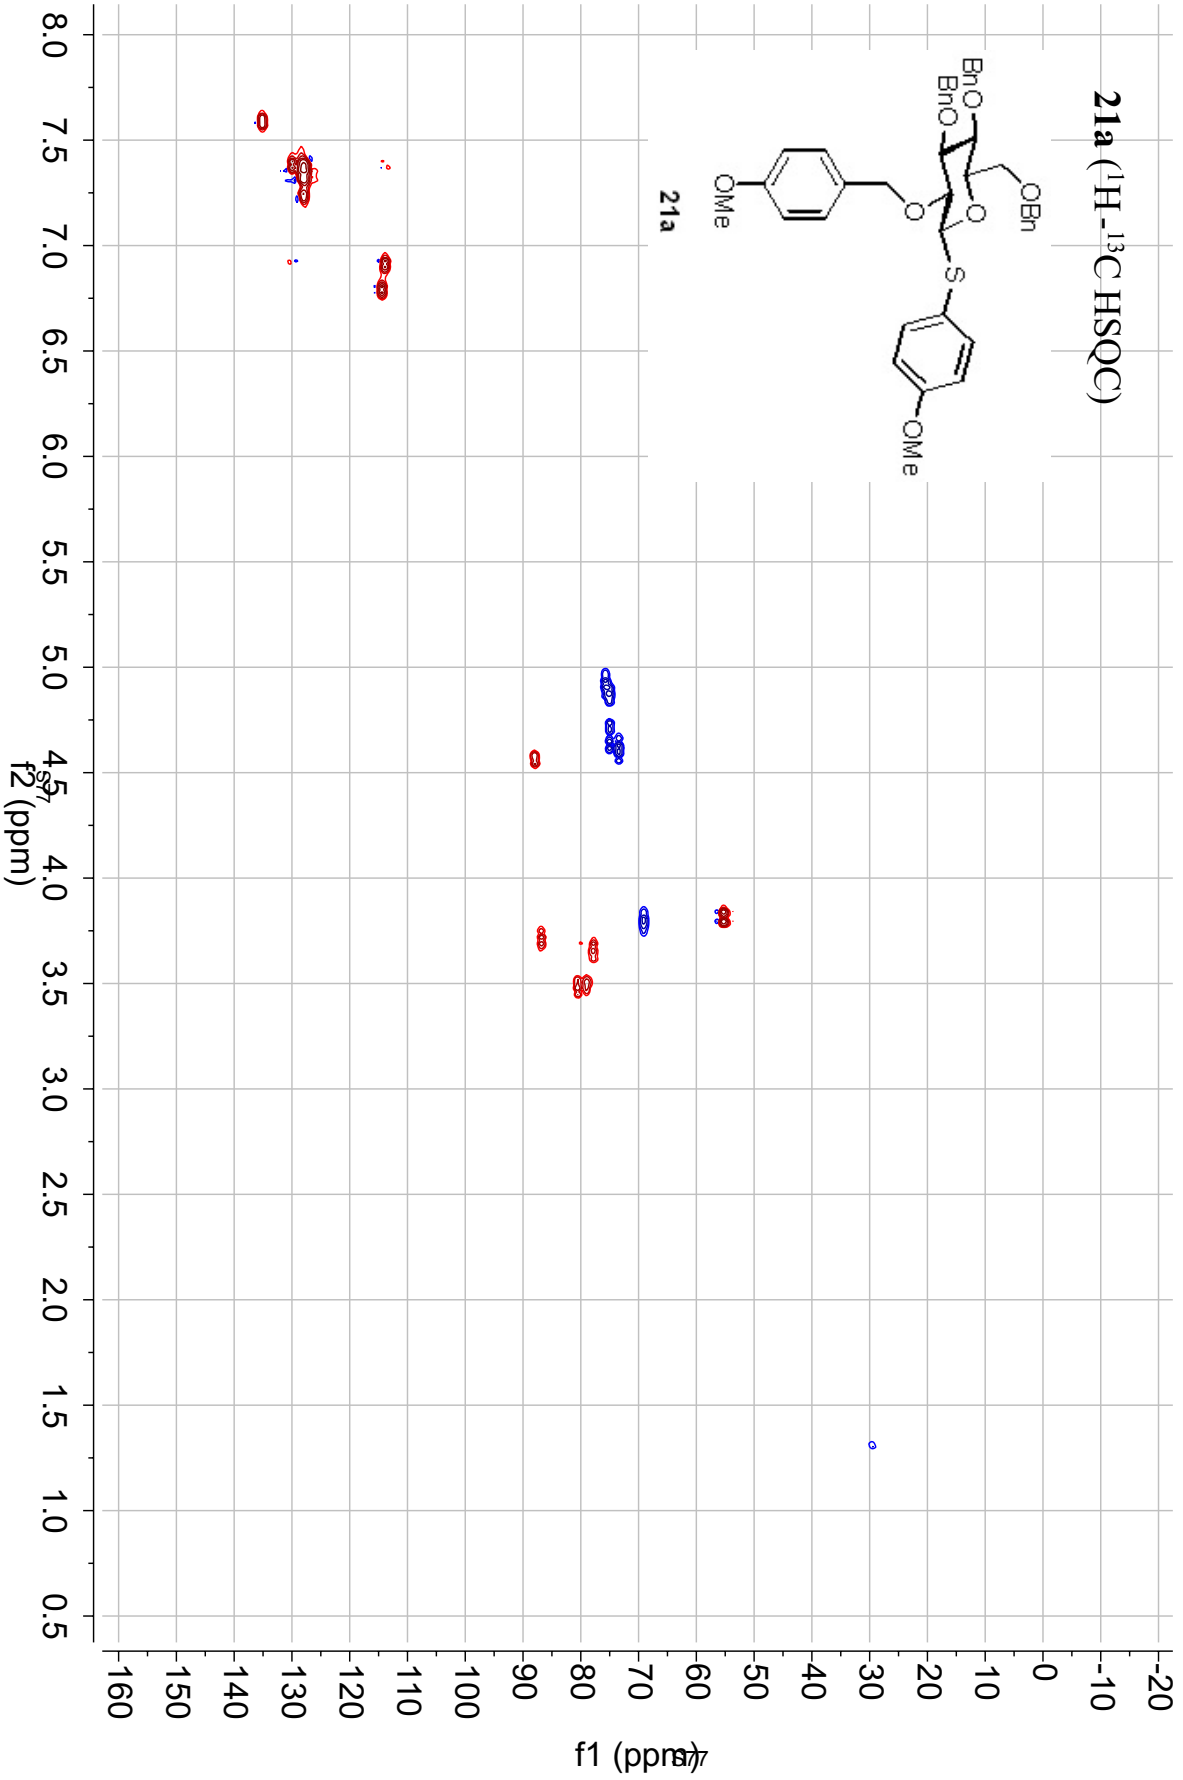

**21b** (<sup>1</sup>H NMR, 300MHz, CDCl<sub>3</sub>)

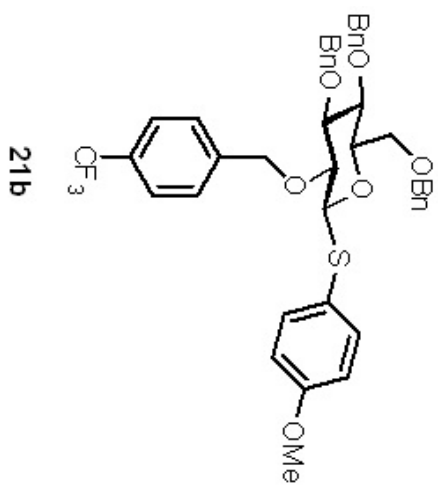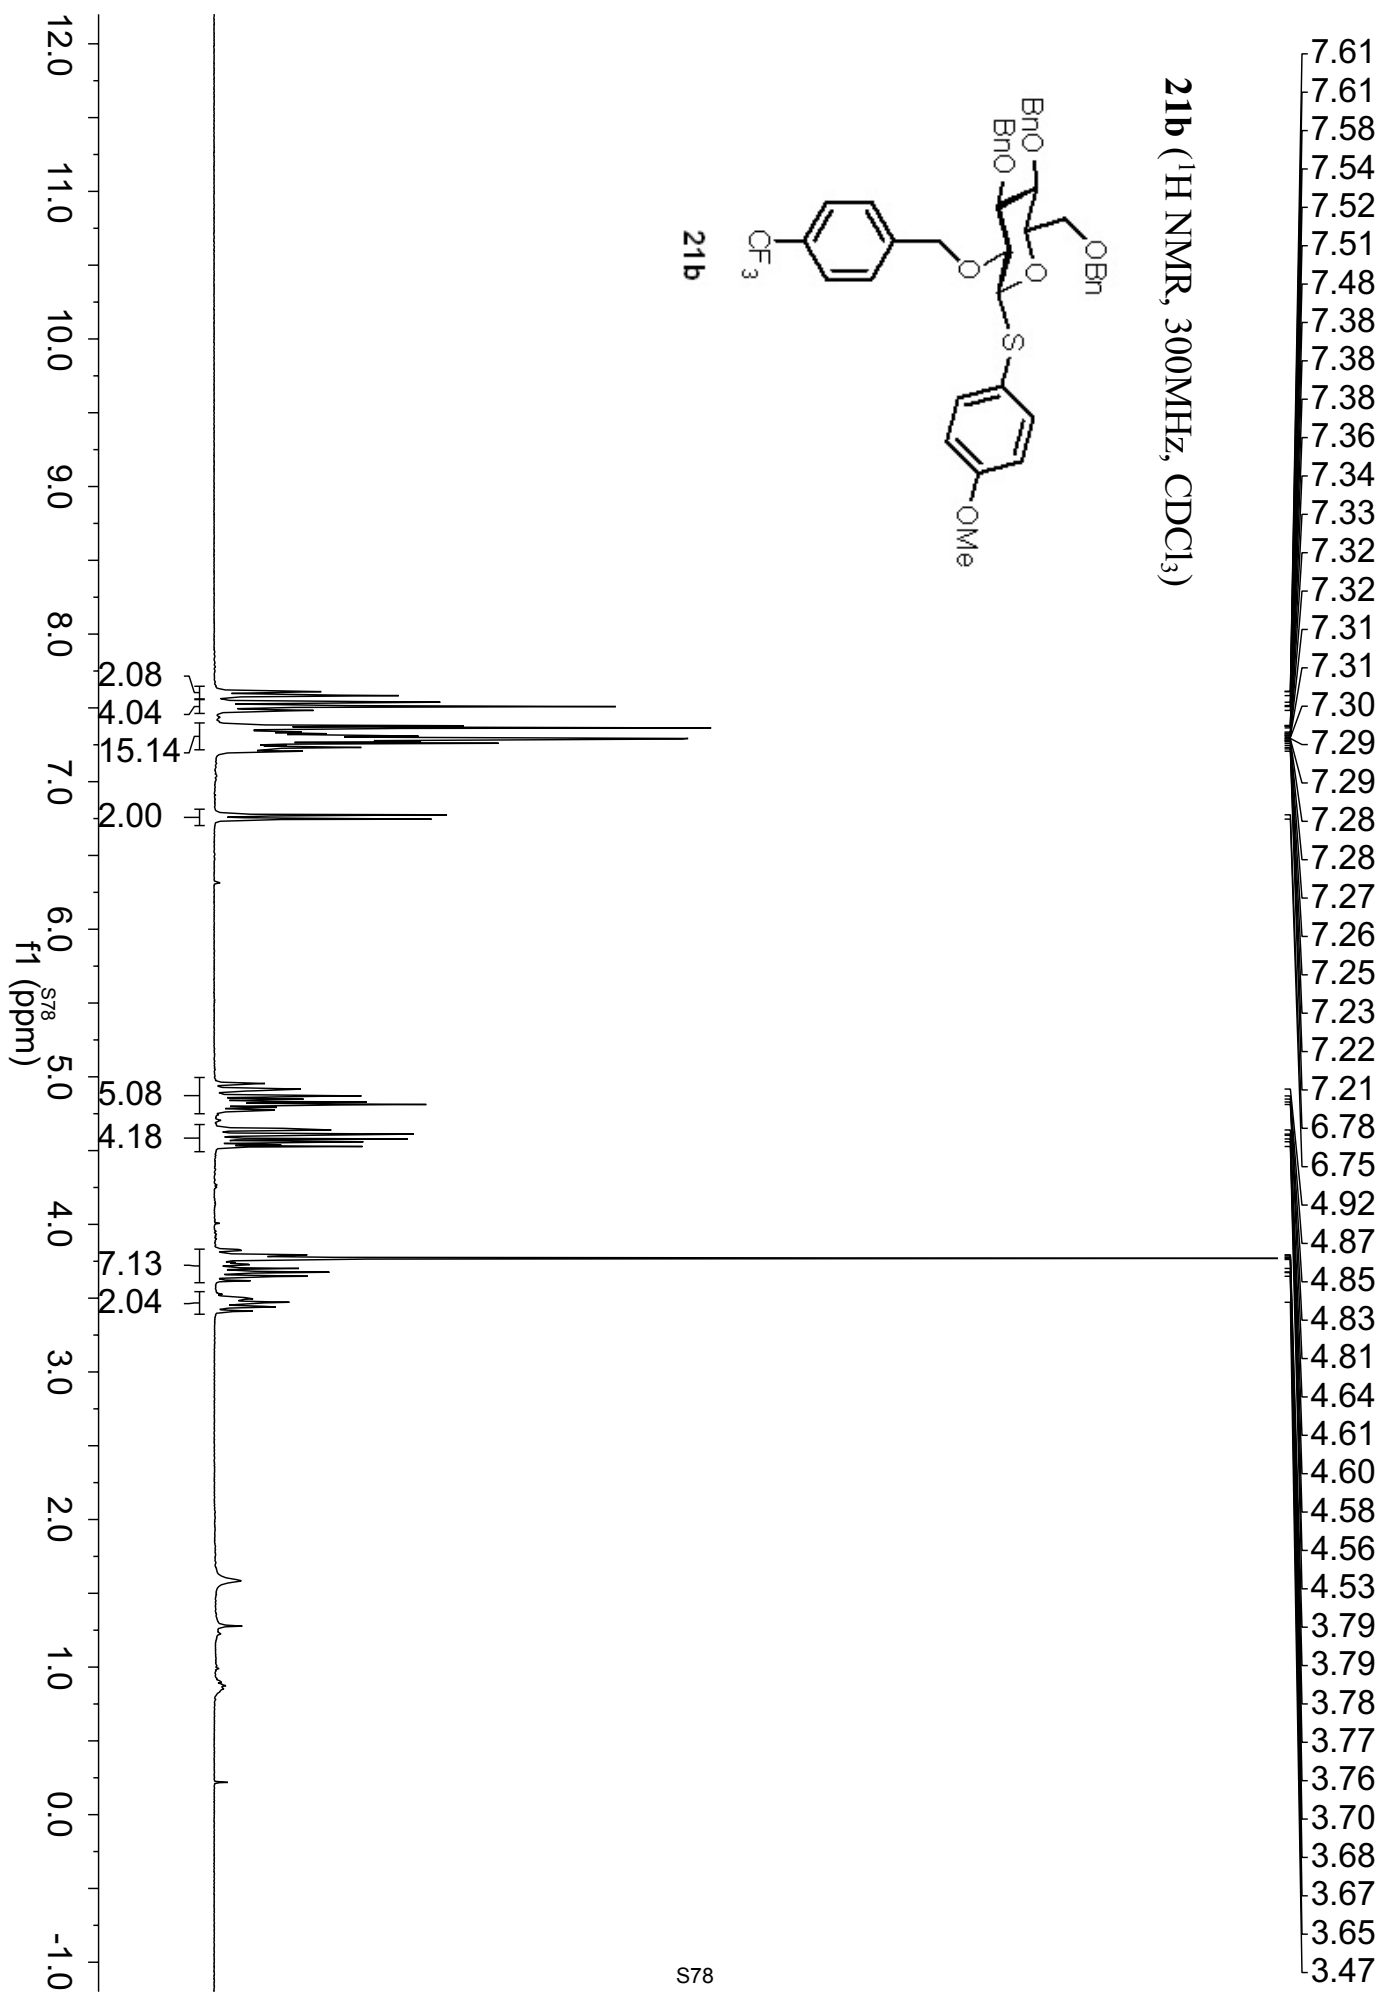

**21b** ( $^{13}\text{C}$  NMR, 75MHz,  $\text{CDCl}_3$ )

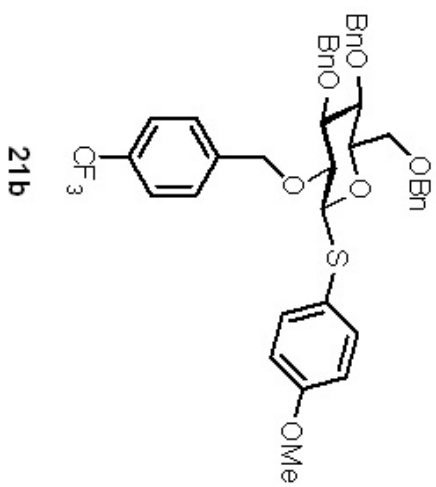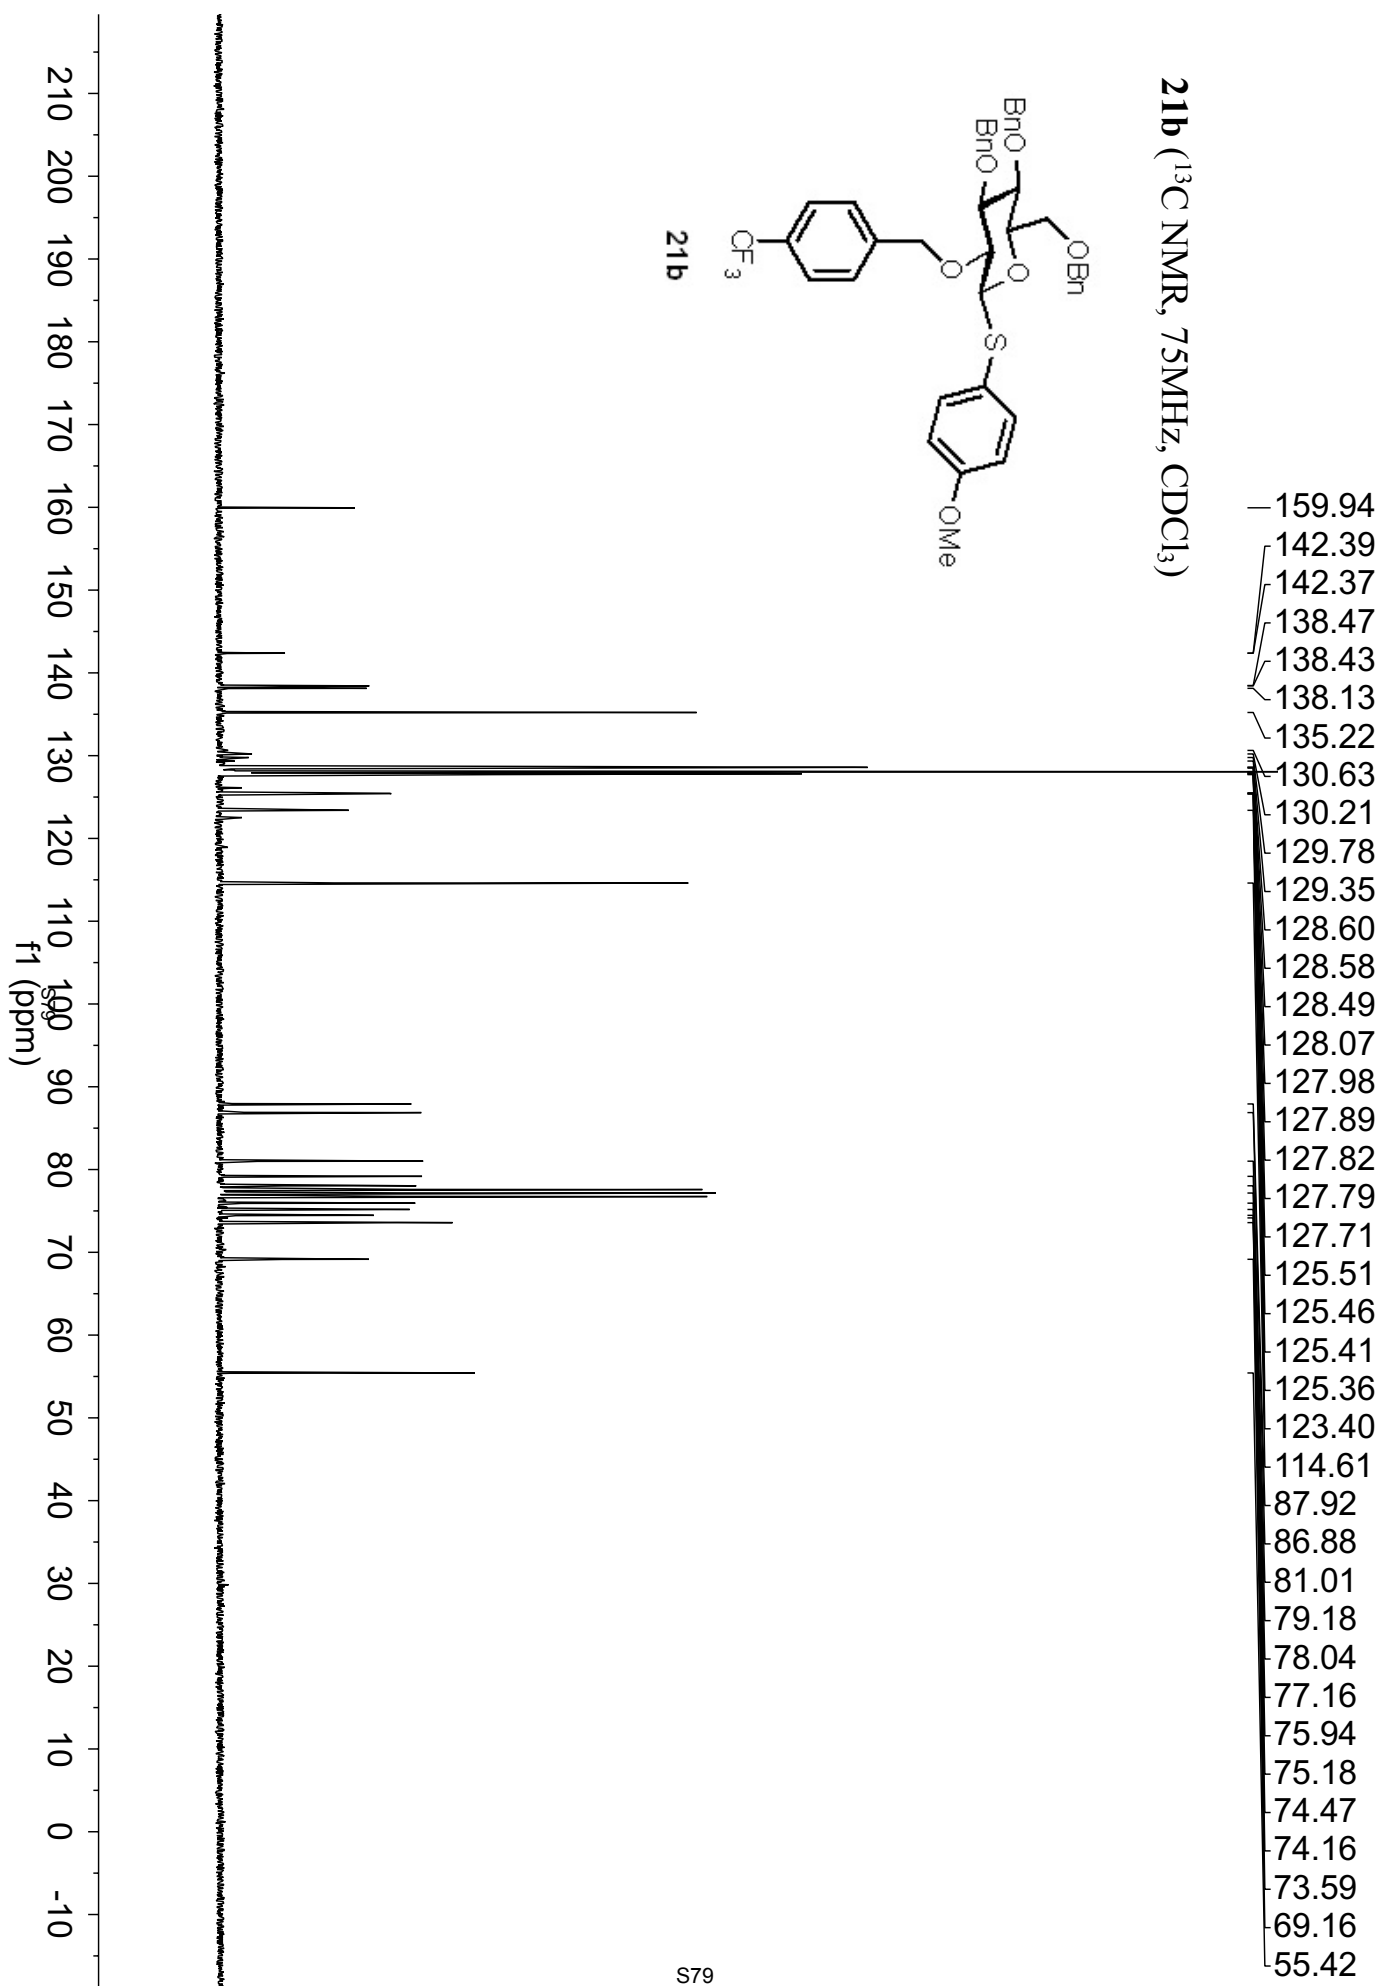

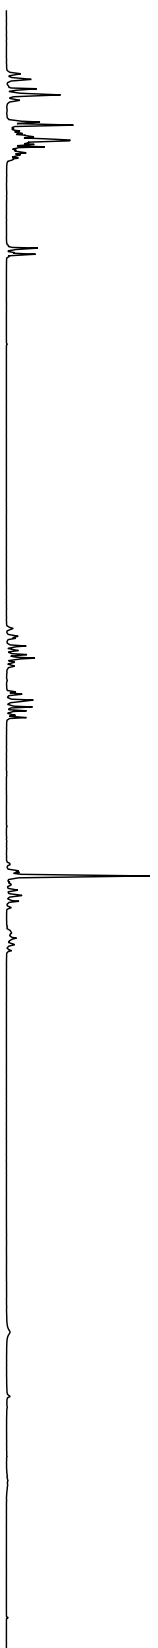

**21b** (<sup>1</sup>H-<sup>13</sup>C Coupled HSQC)

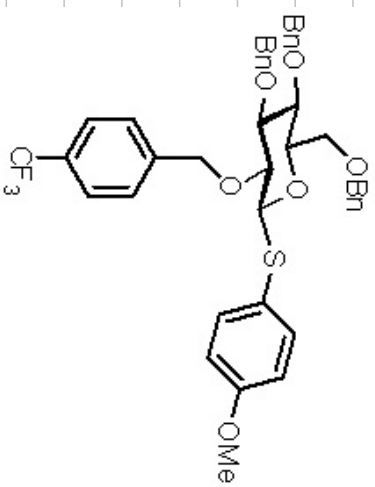

21b

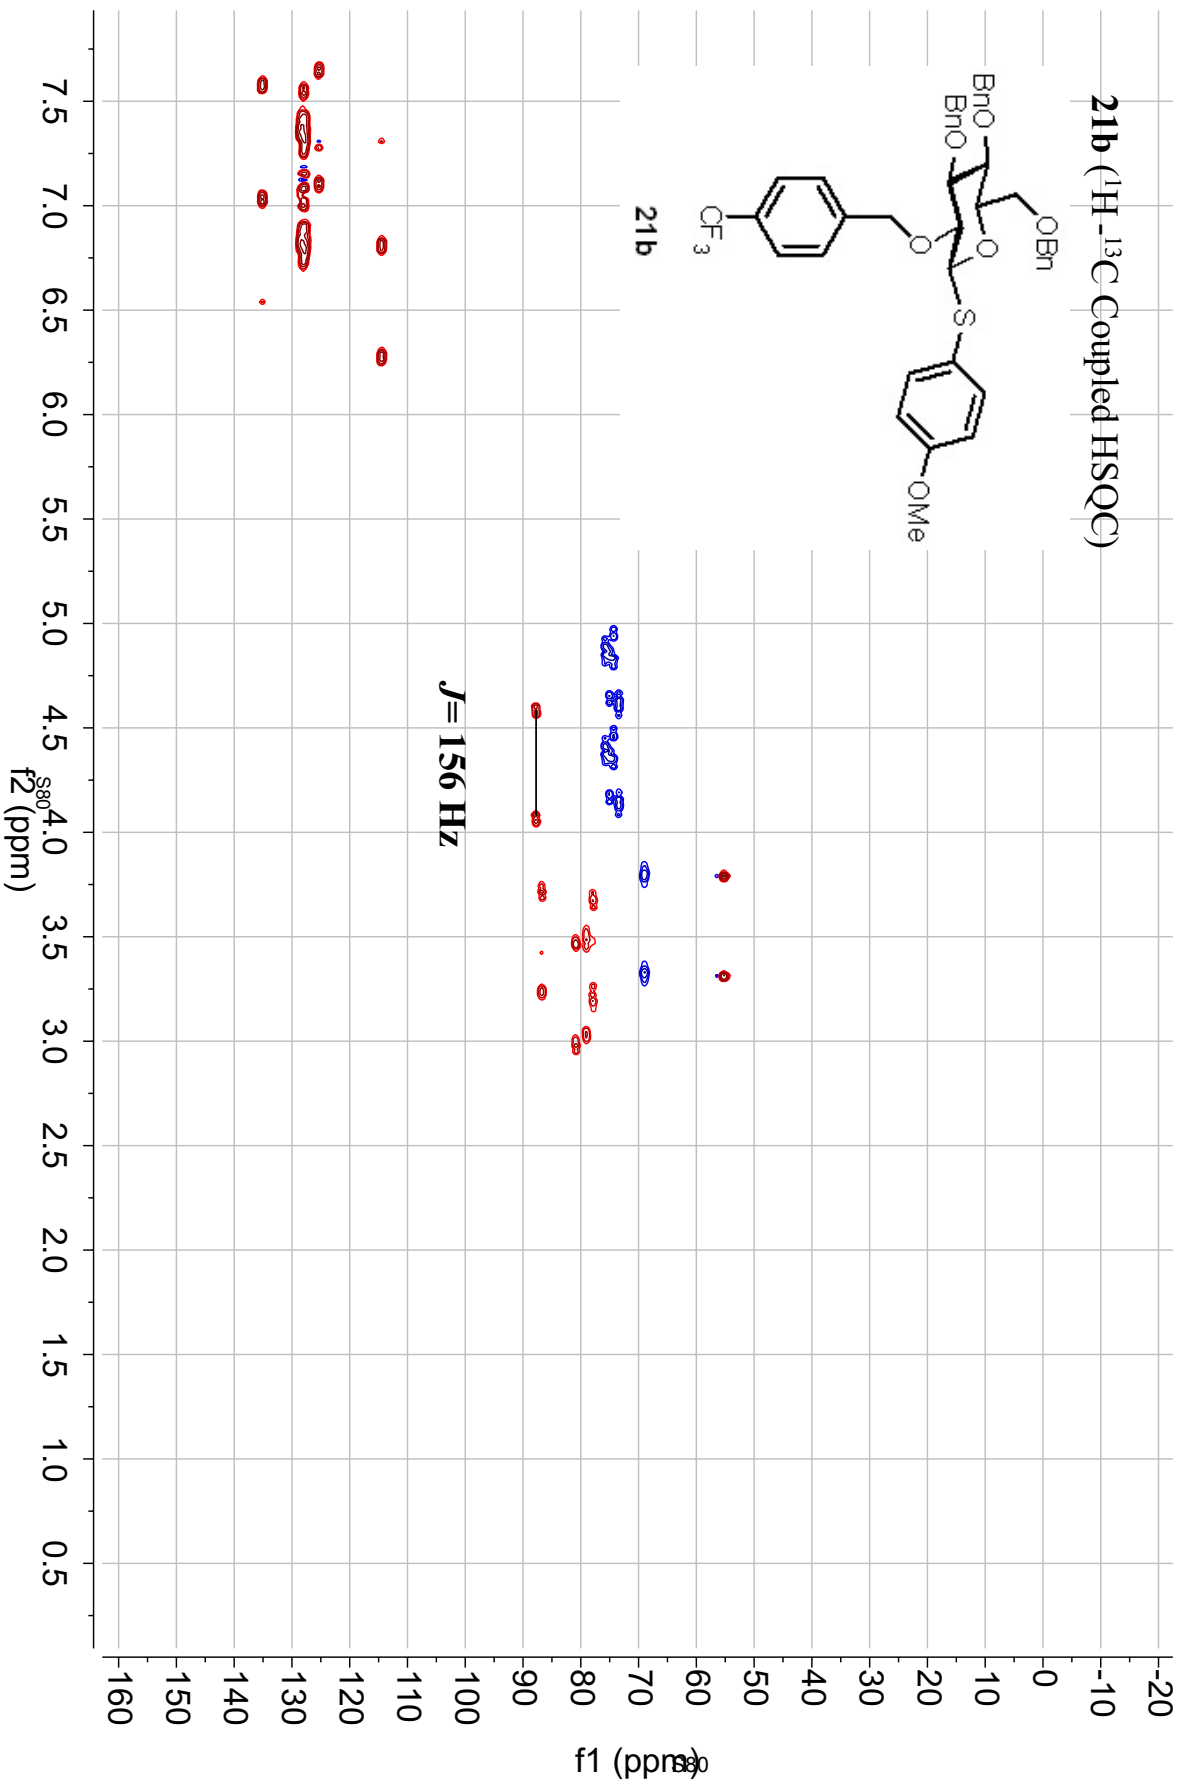



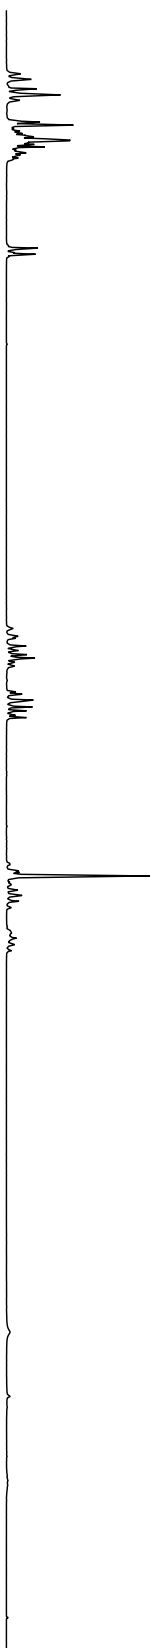

**21b** ( $^1\text{H}$ - $^{13}\text{C}$ HSQC)

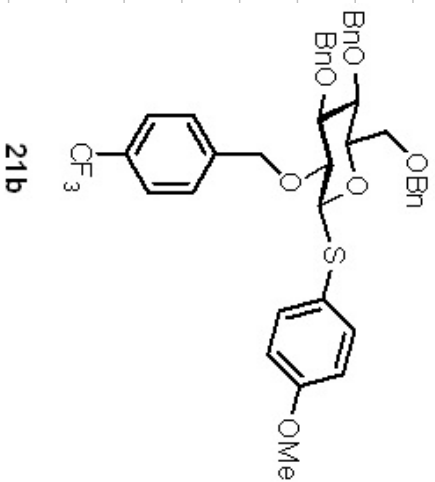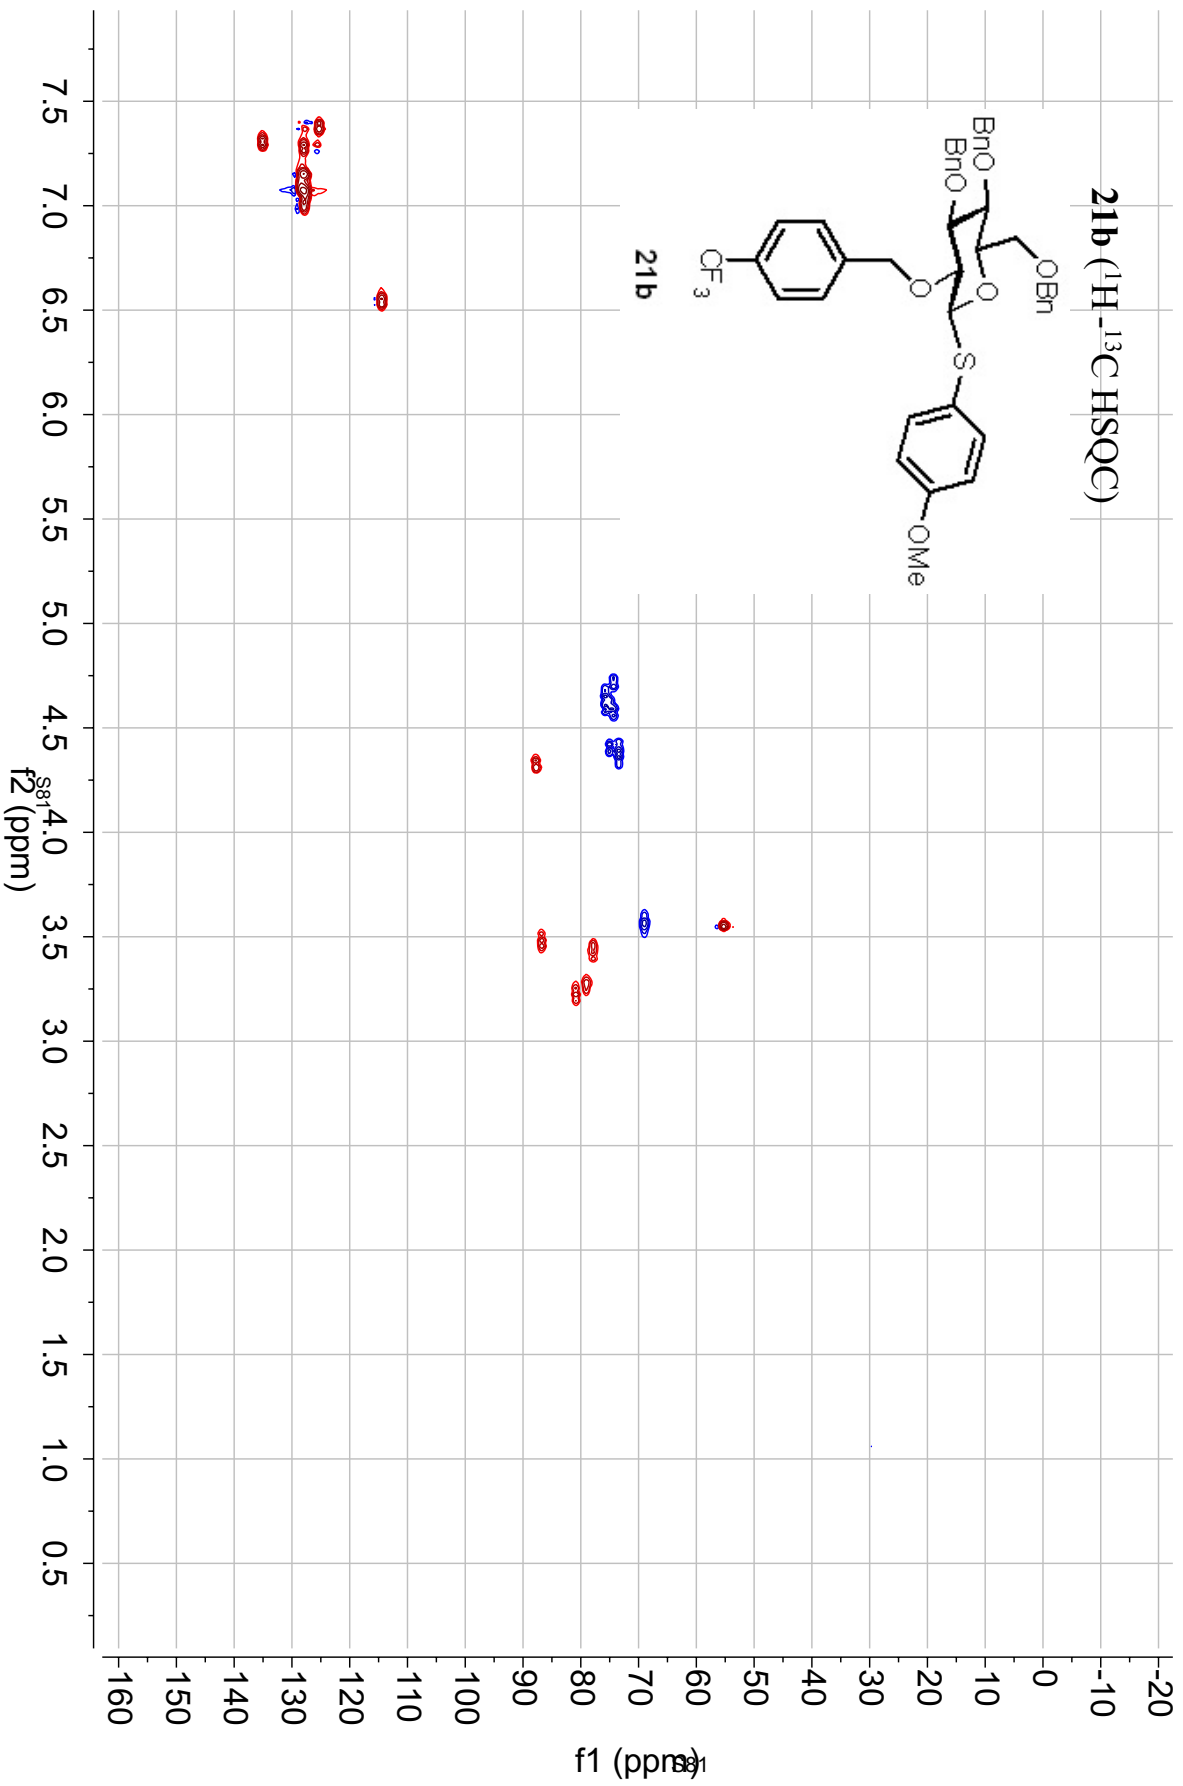

**21b** (<sup>19</sup>F NMR, 282 MHz, CDCl<sub>3</sub>)

—62.47

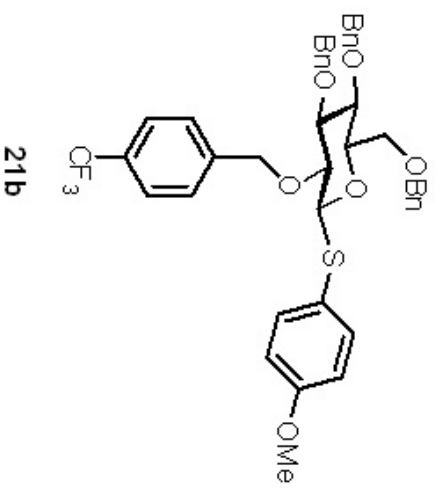

**21b**

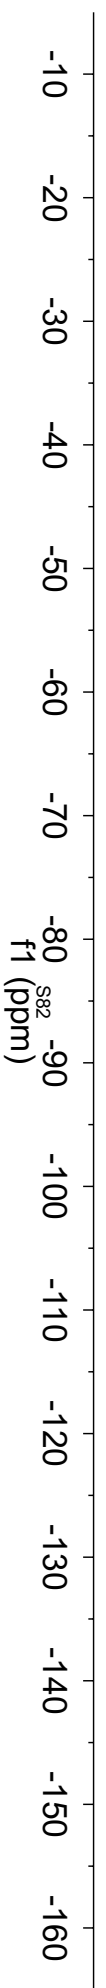

**21c** (<sup>1</sup>H NMR, 300MHz, CDCl<sub>3</sub>)

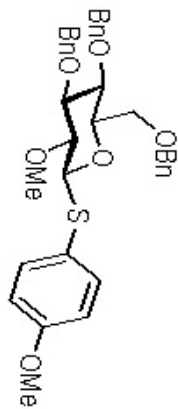

21c

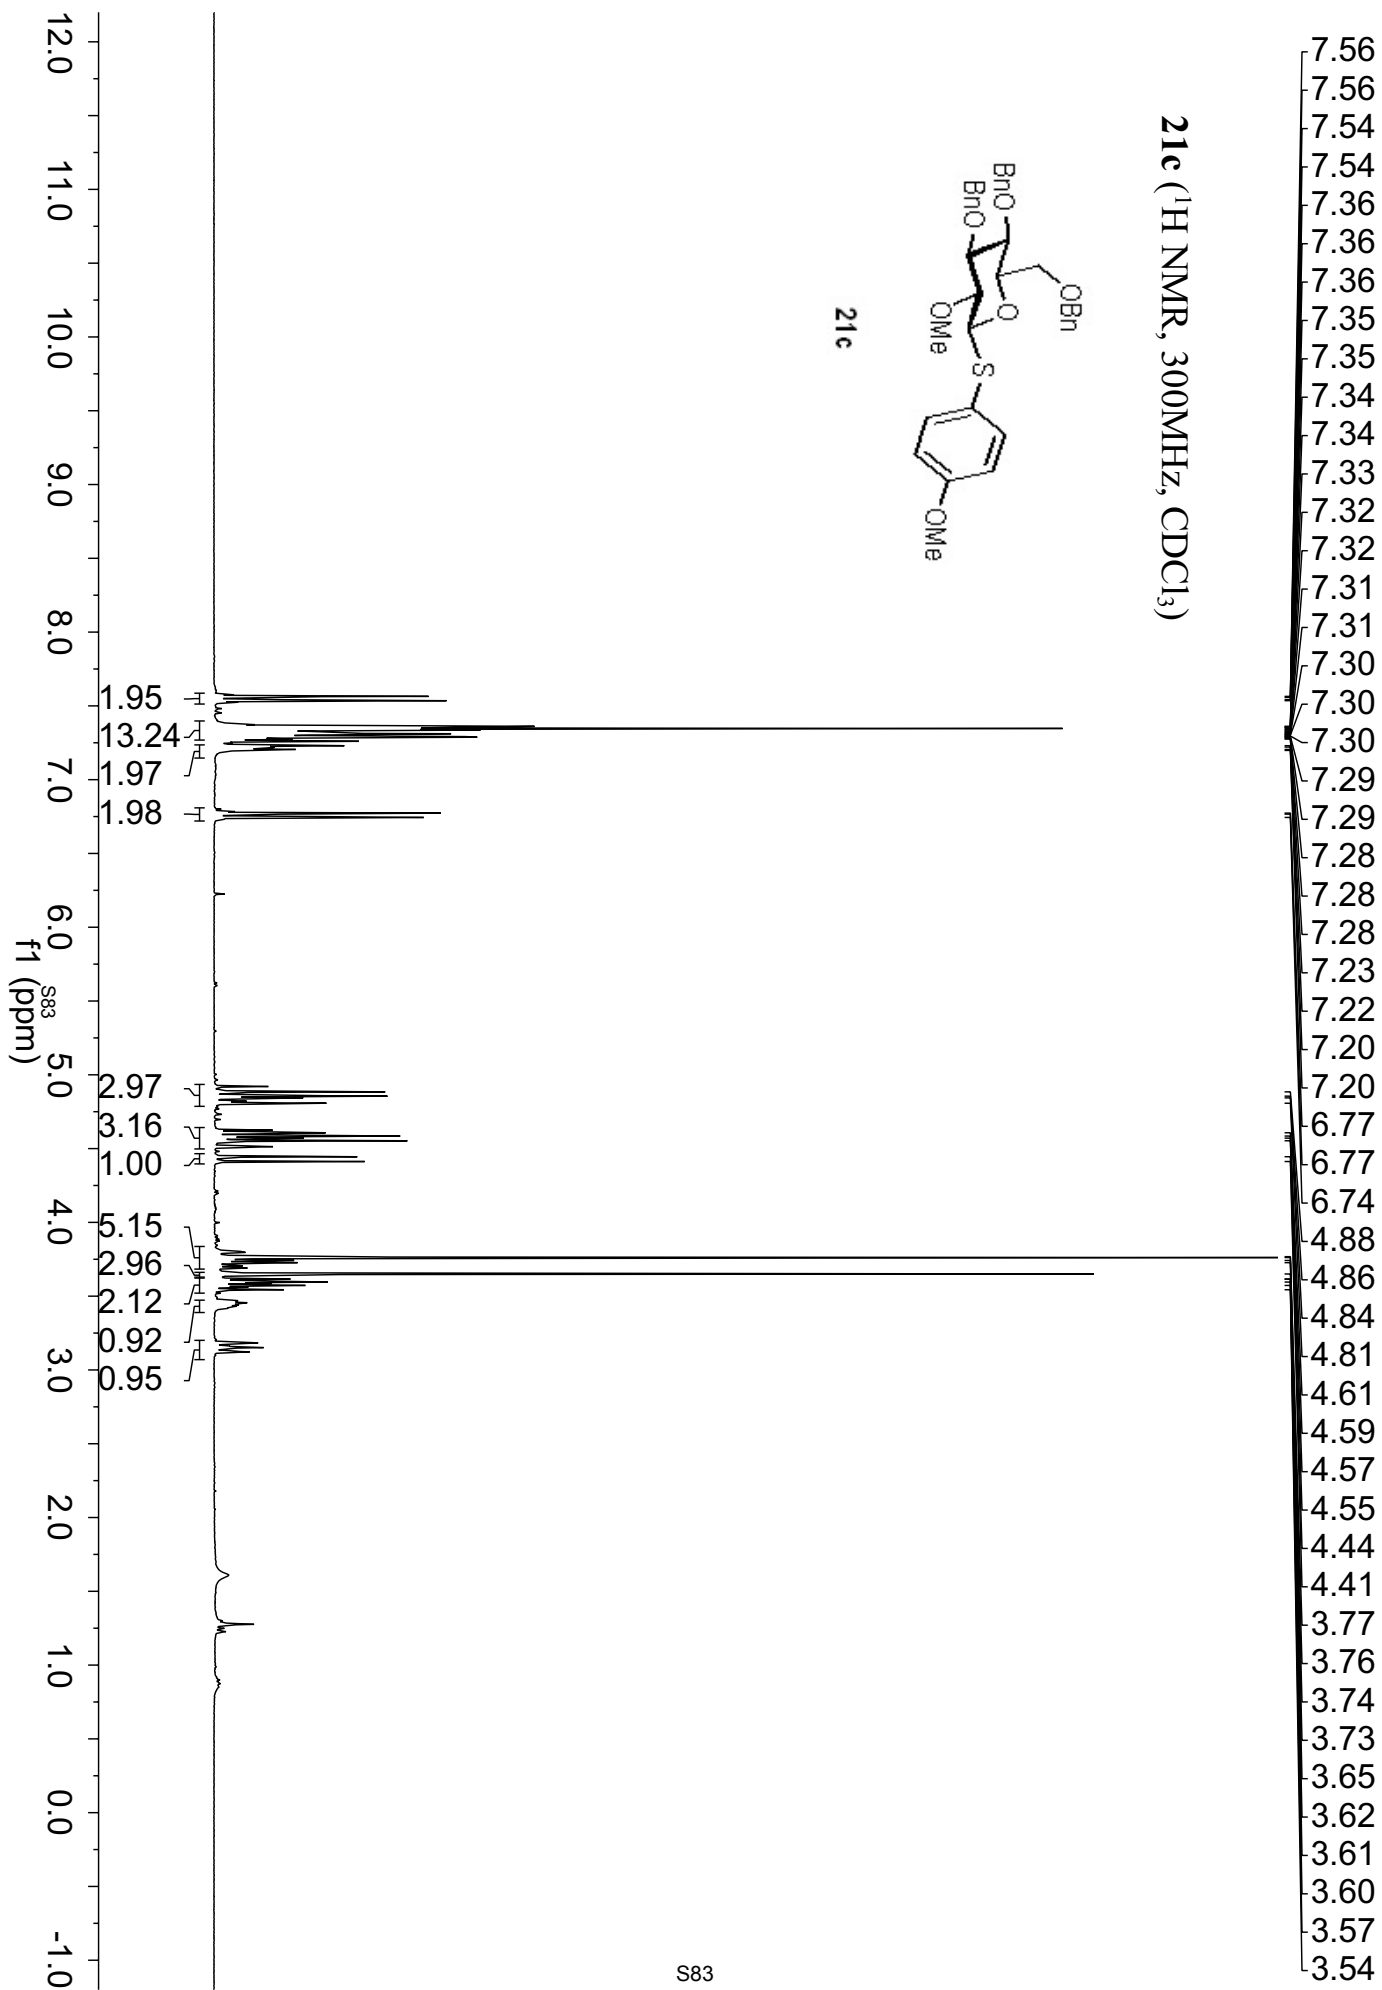

**21c** (<sup>13</sup>C NMR, 75MHz, CDCl<sub>3</sub>)

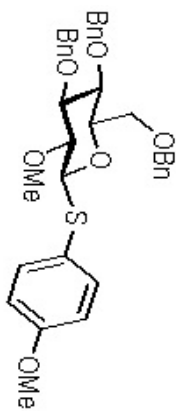

**21c**

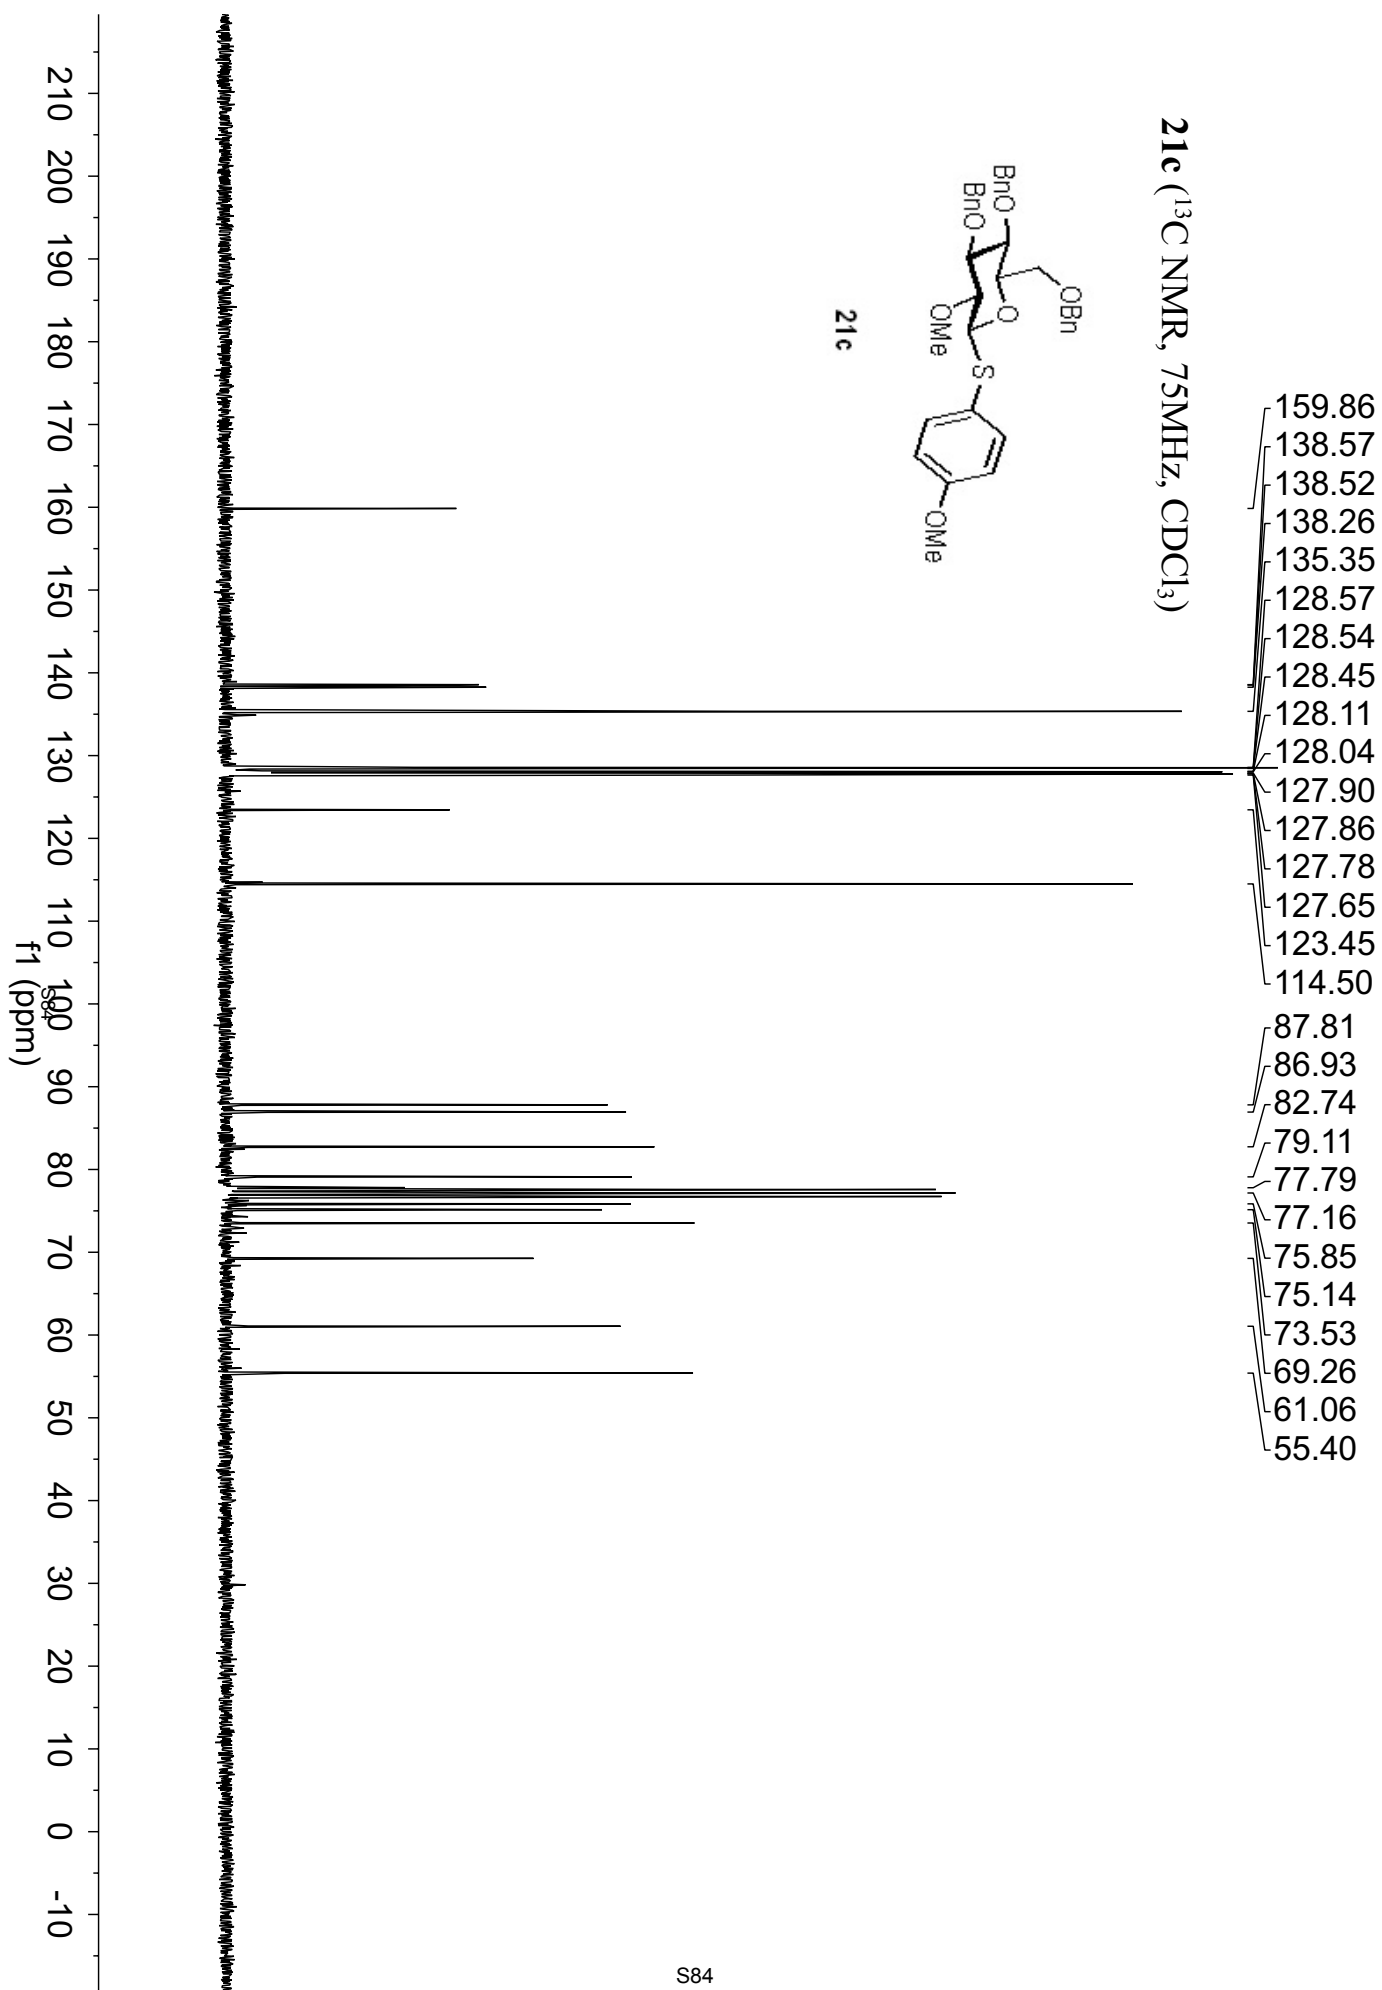

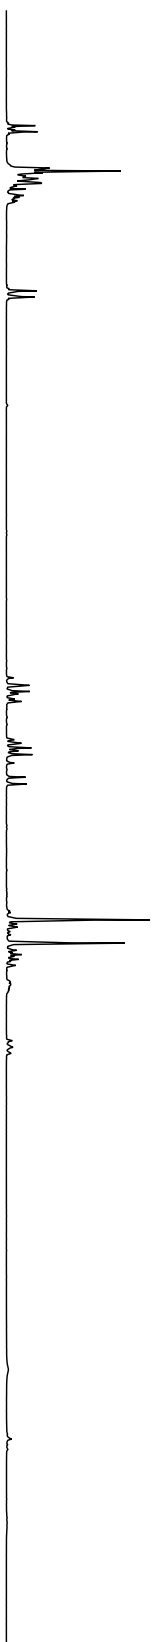

**21c** ( $^1\text{H}$ - $^{13}\text{C}$  Coupled HSQC)

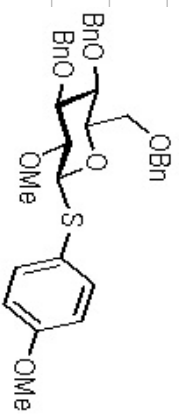

**21c**

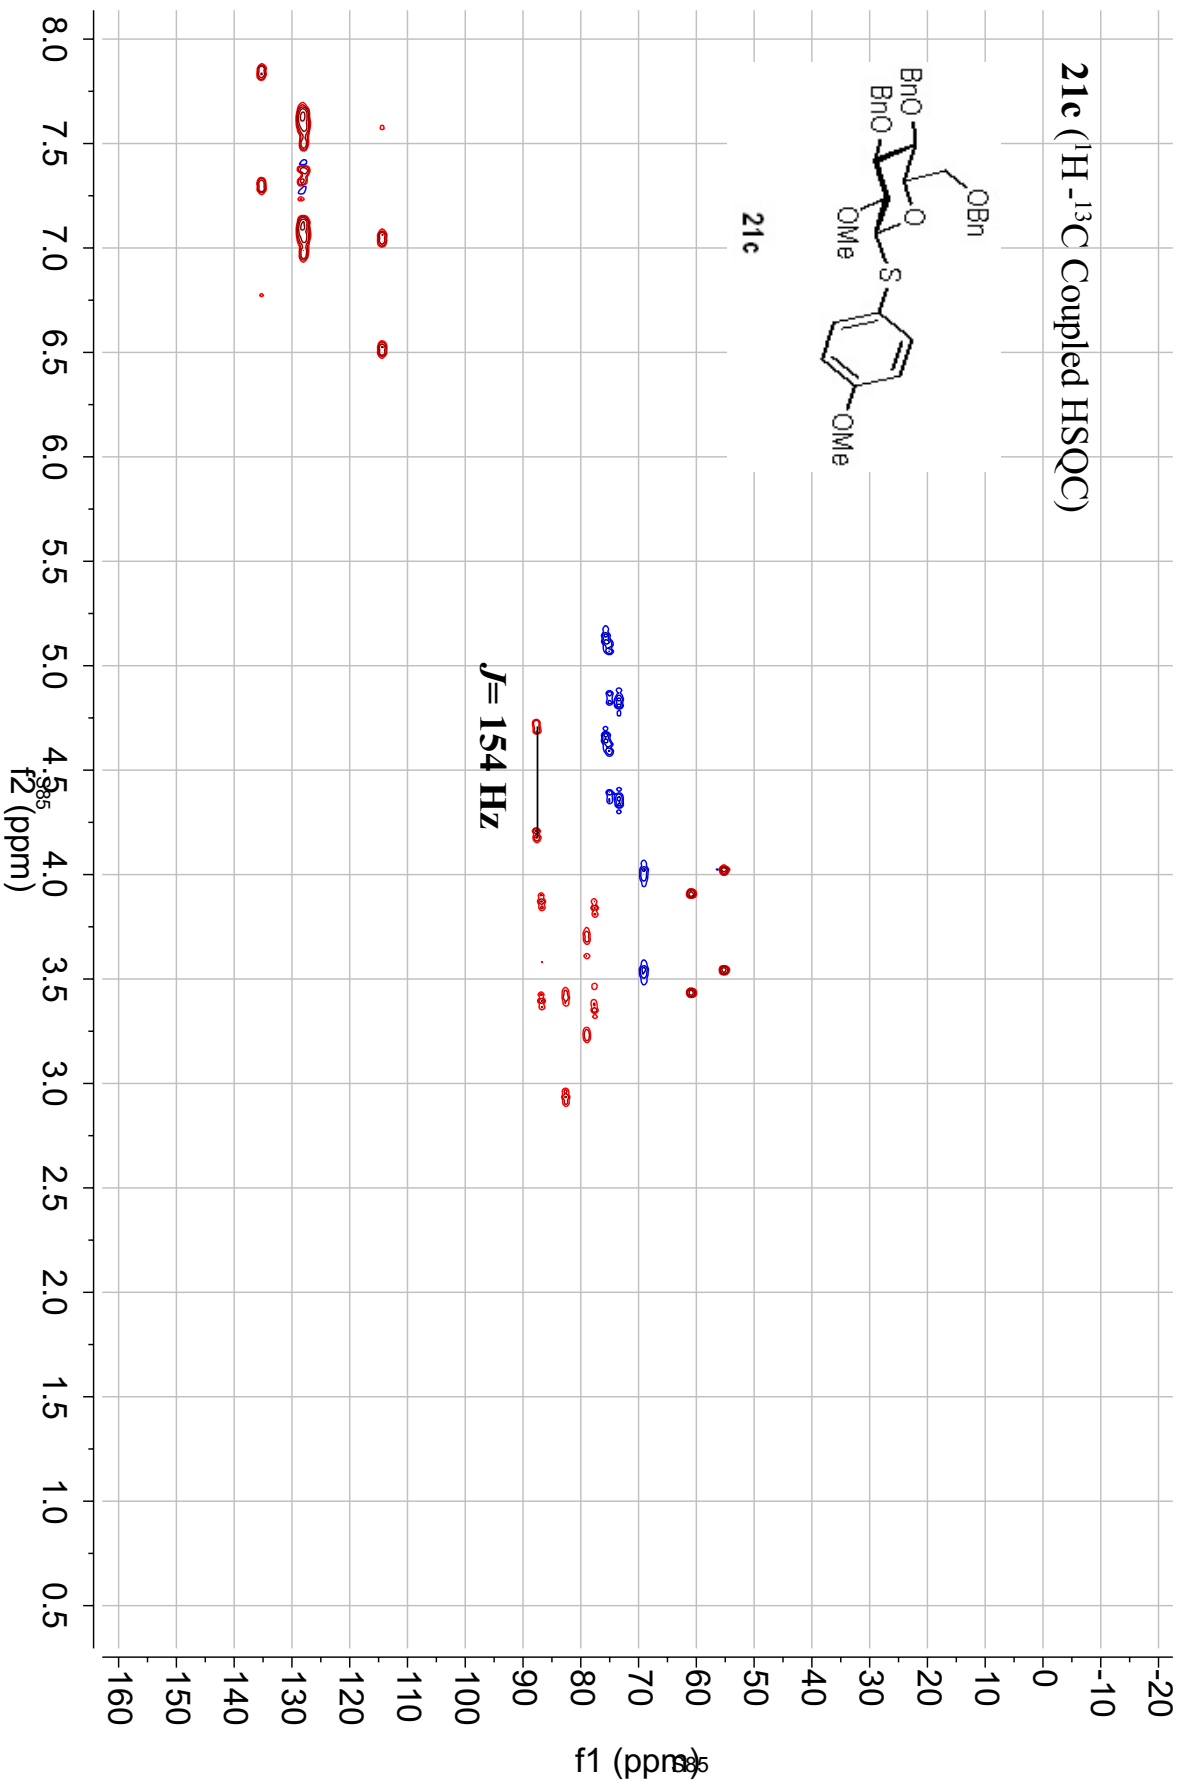

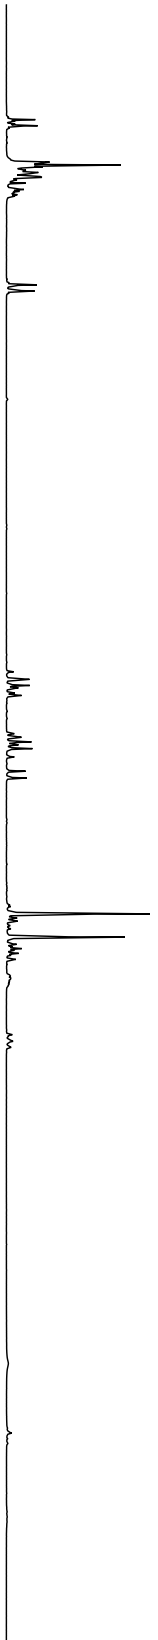

**21c** ( $^1\text{H}$ - $^{13}\text{C}$  HSQC)

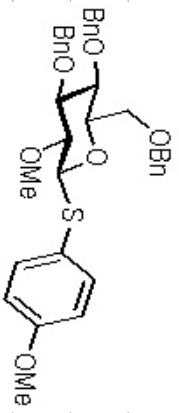

**21c**

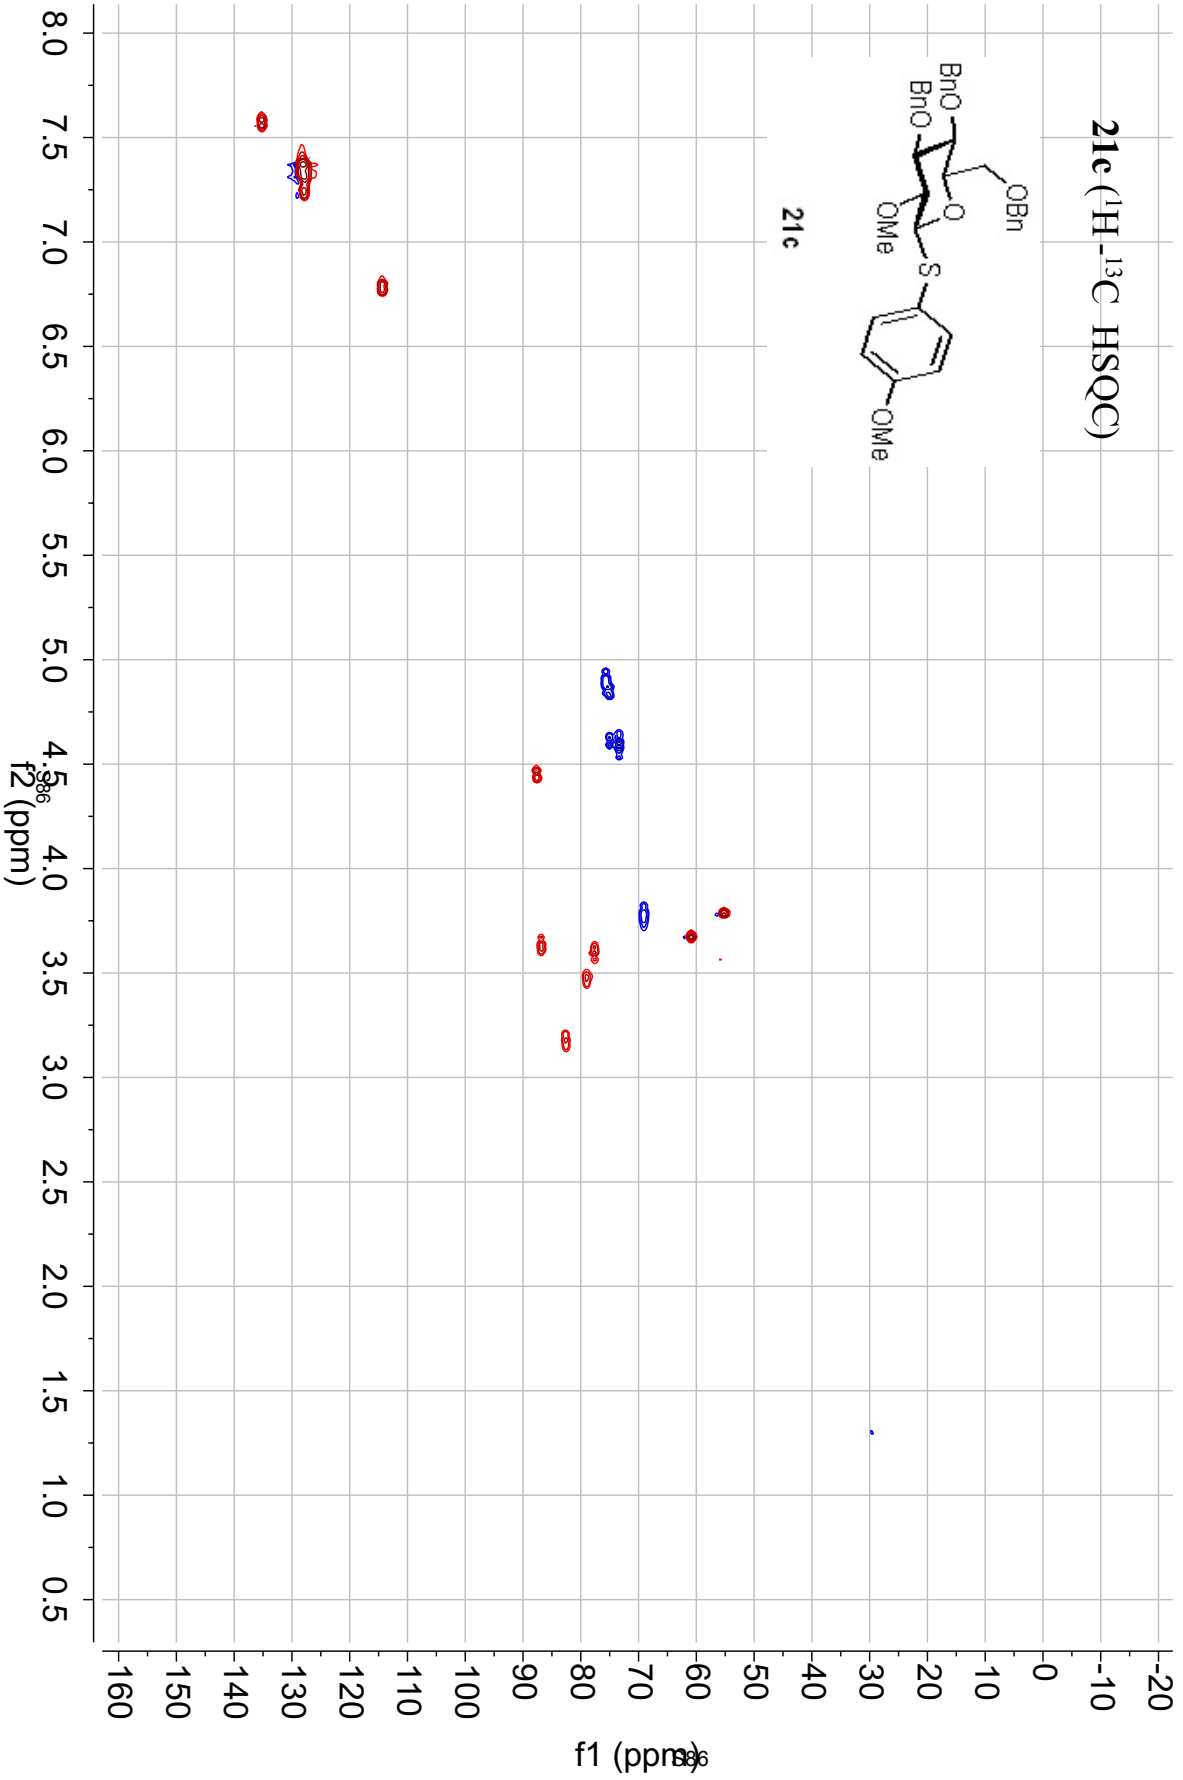

**27b** (<sup>1</sup>H NMR, 300MHz, CDCl<sub>3</sub>)

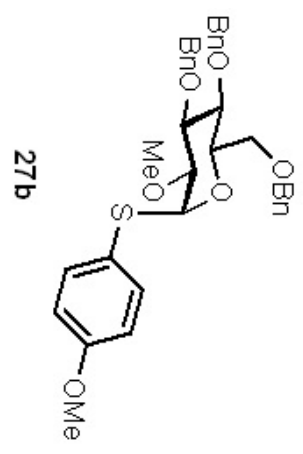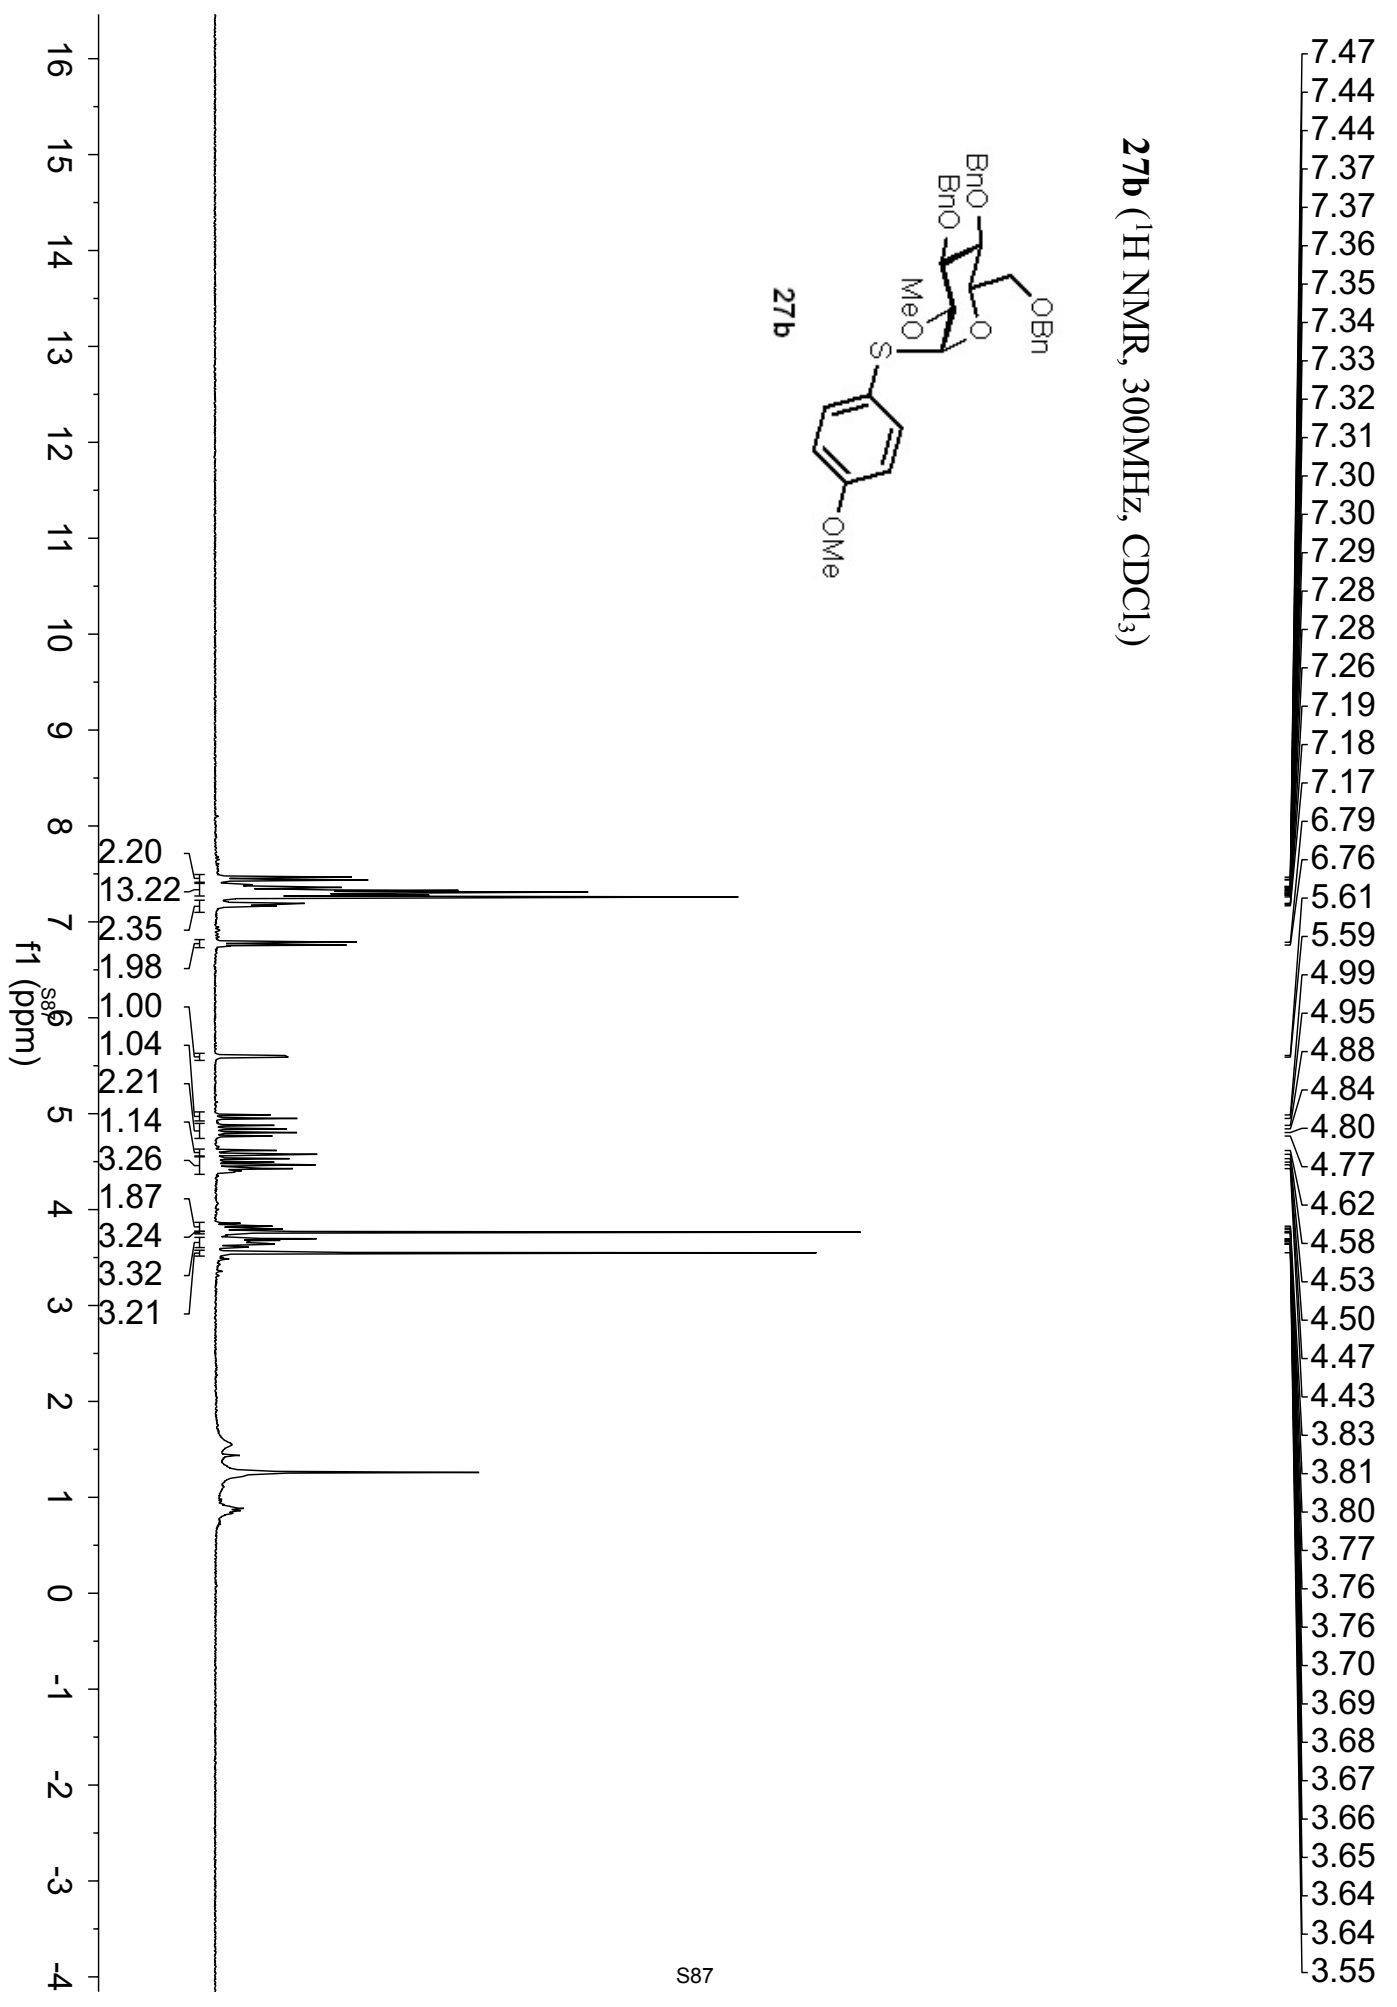

**27b** ( $^{13}\text{C}$  NMR, 75MHz,  $\text{CDCl}_3$ )

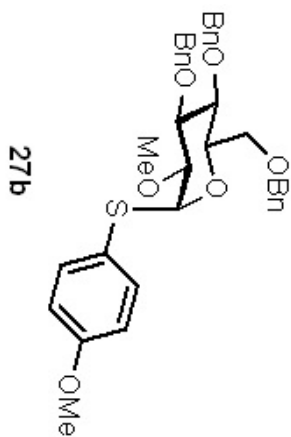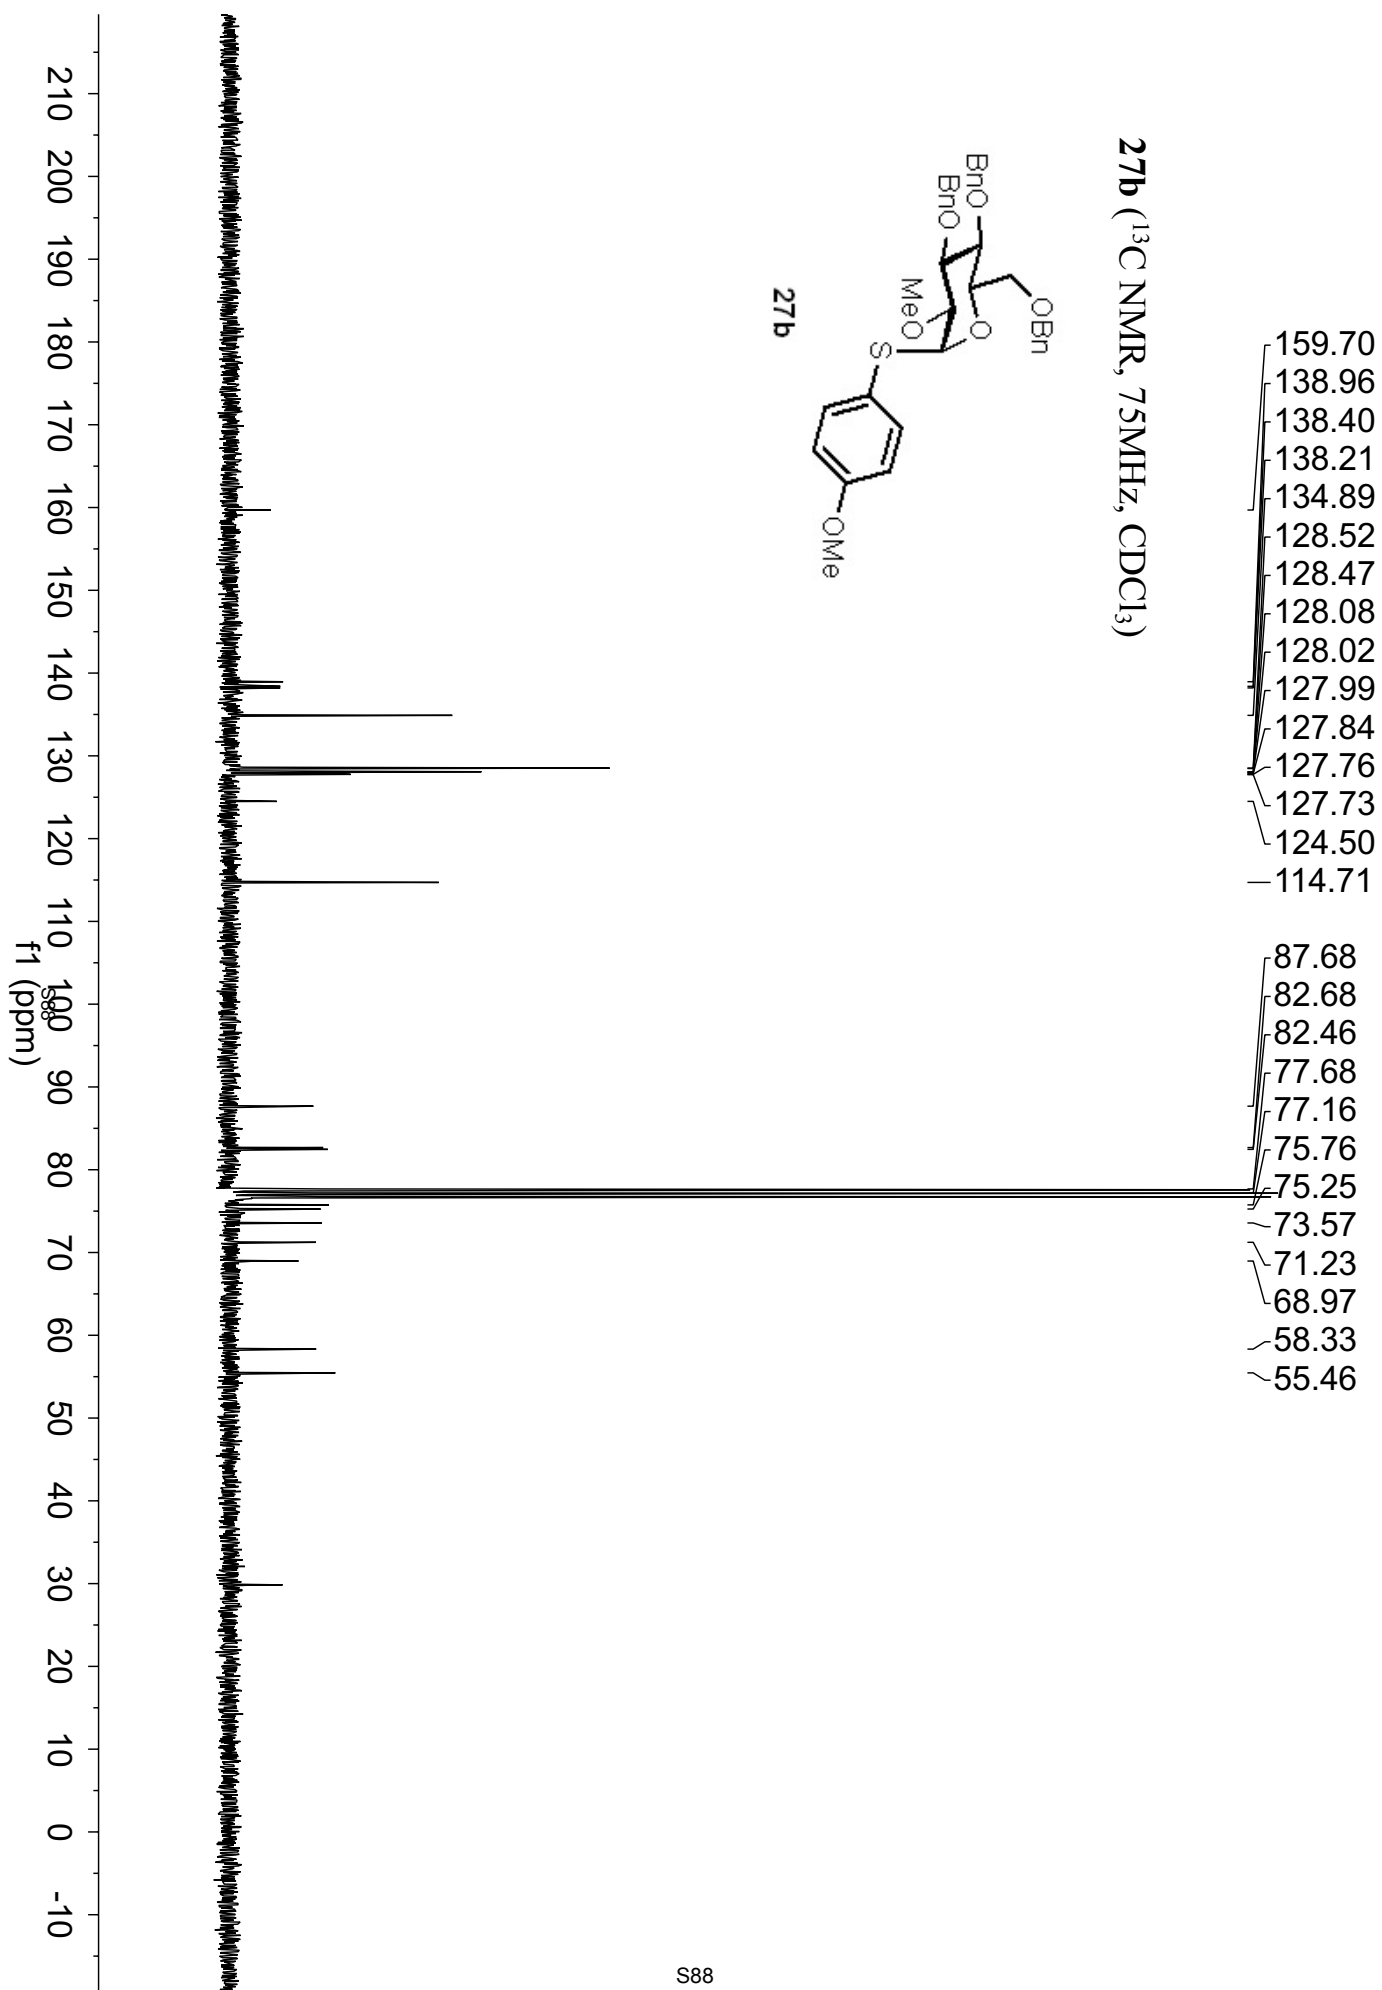



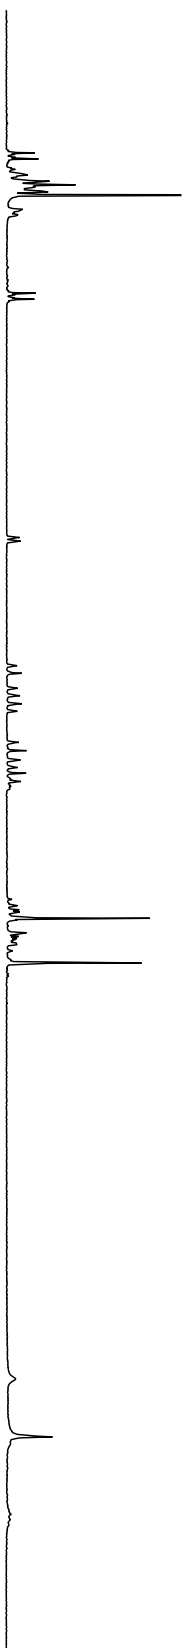

**27b** ( $^1\text{H}$ - $^{13}\text{C}$  Coupled HSQC)

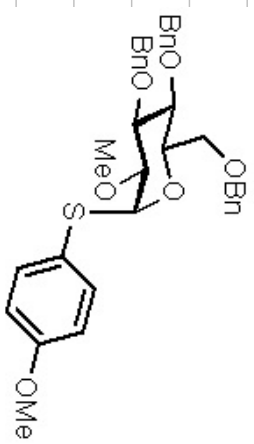

27b

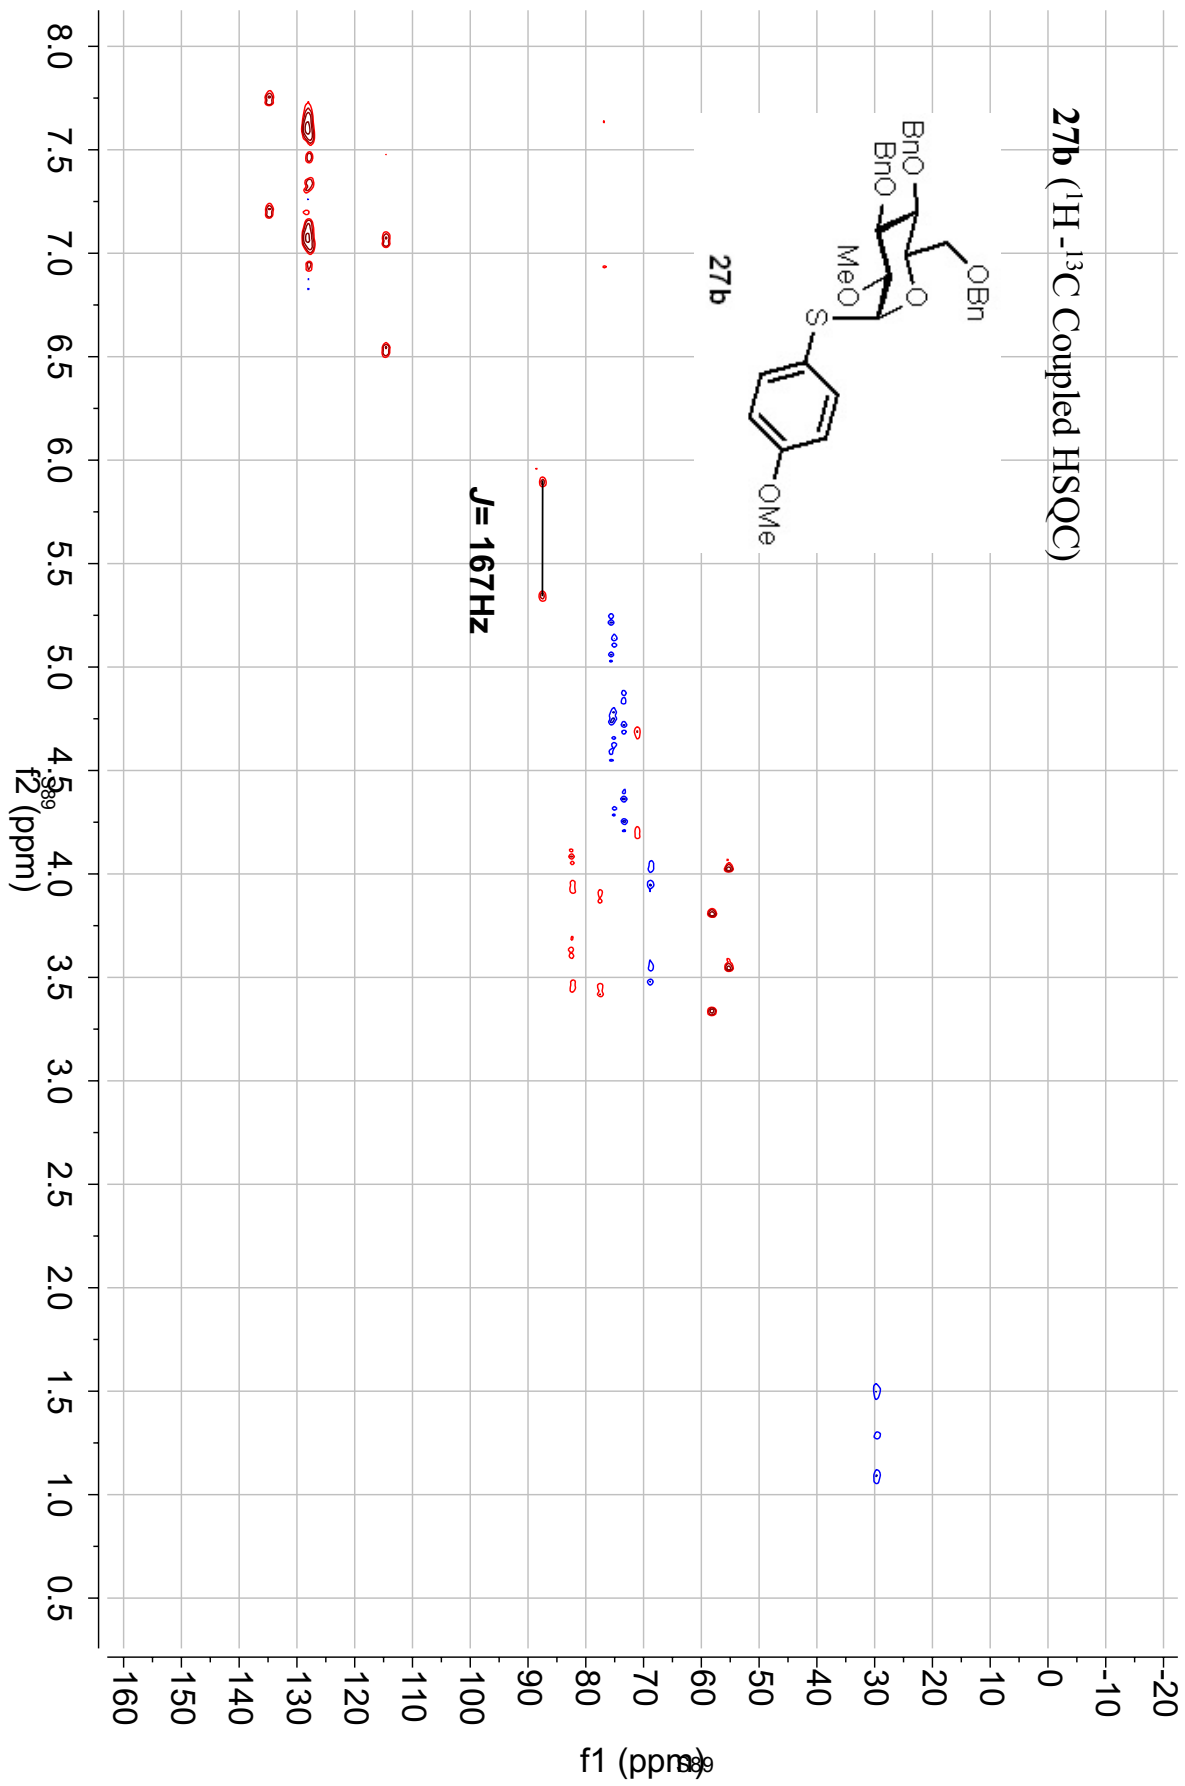

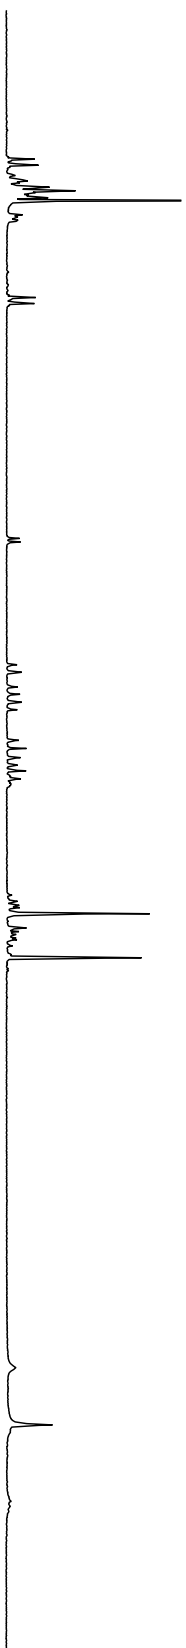

**27b** ( $^1\text{H}$ - $^{13}\text{C}$  HSQC)

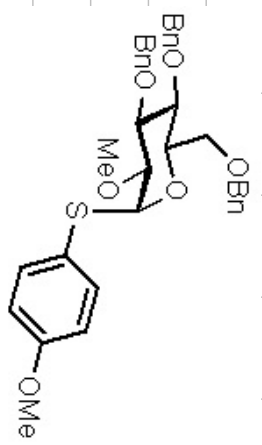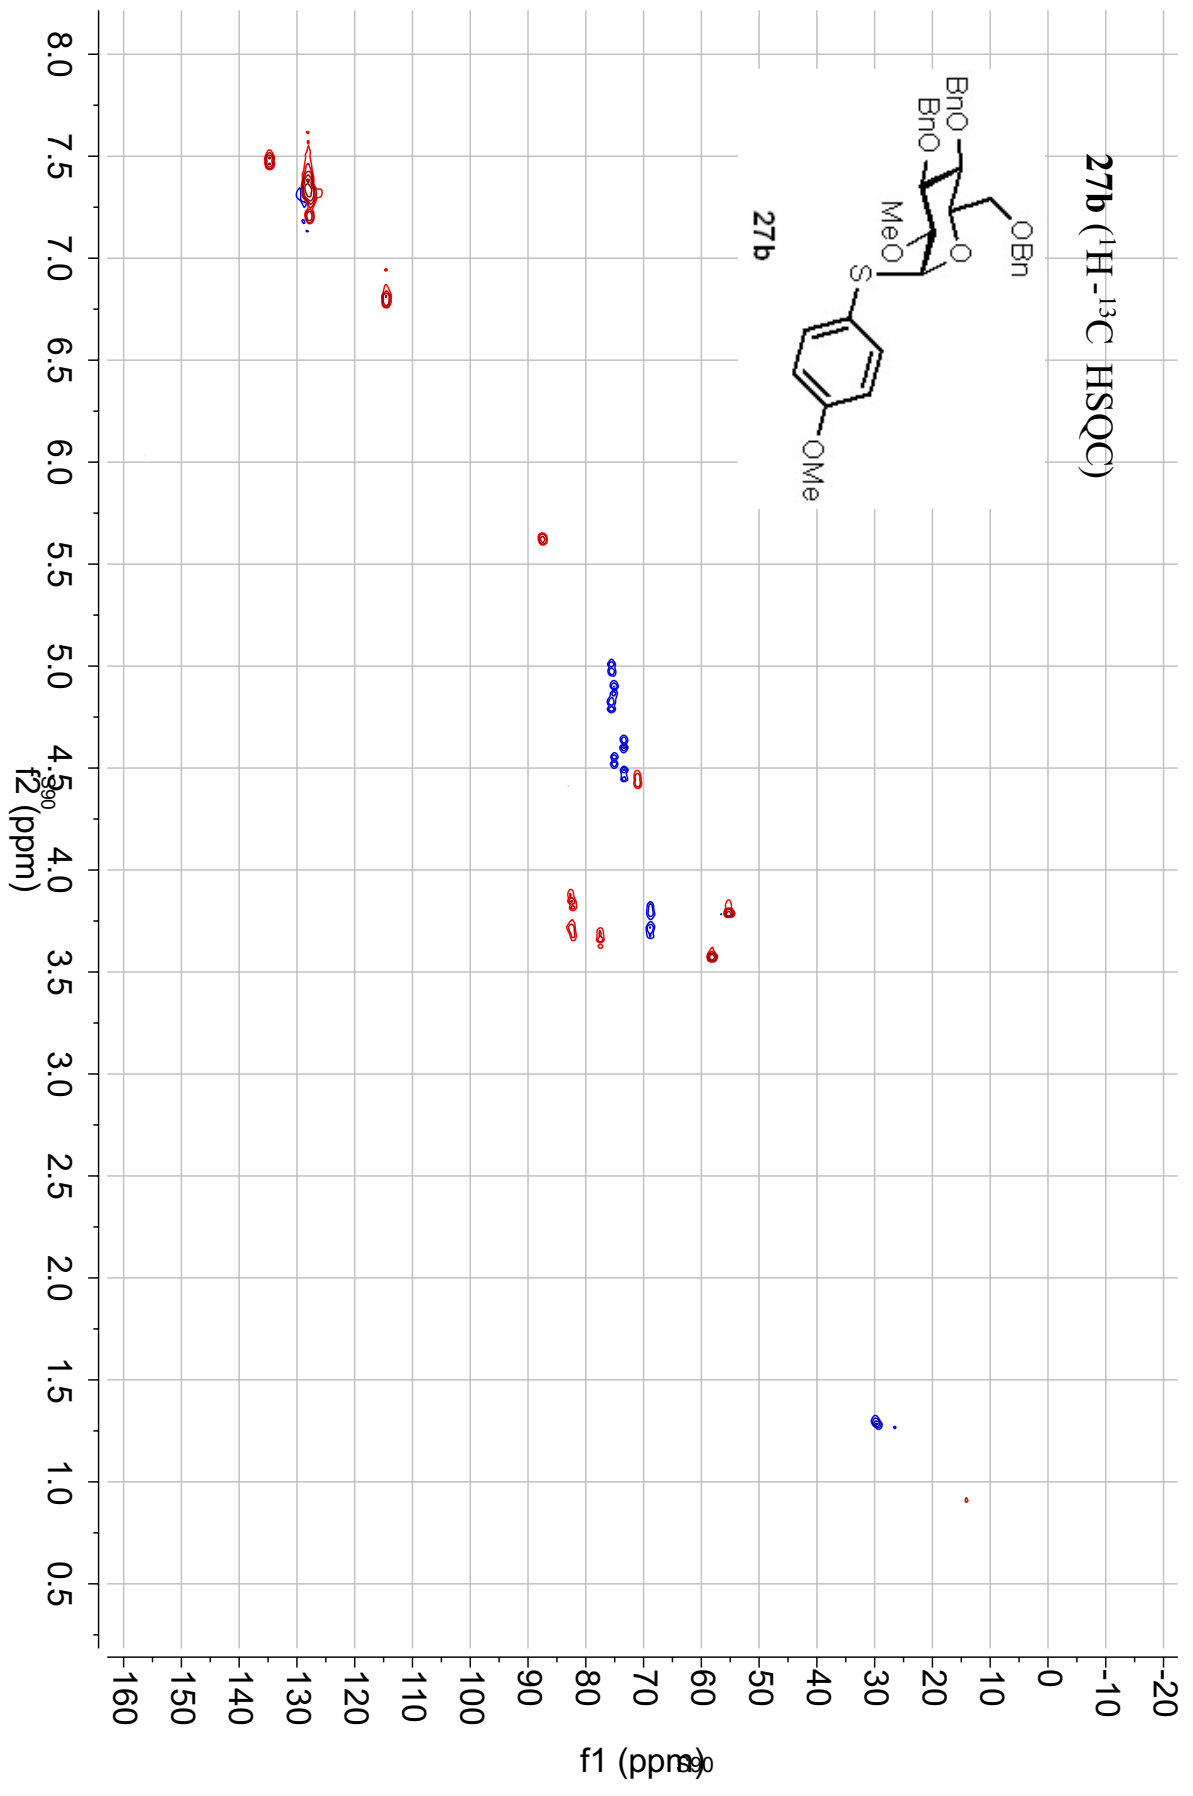

27c (<sup>1</sup>H NMR, 300MHz, CDCl<sub>3</sub>)

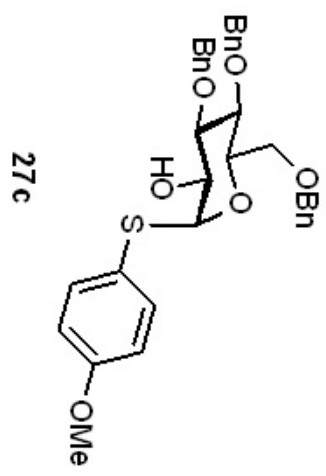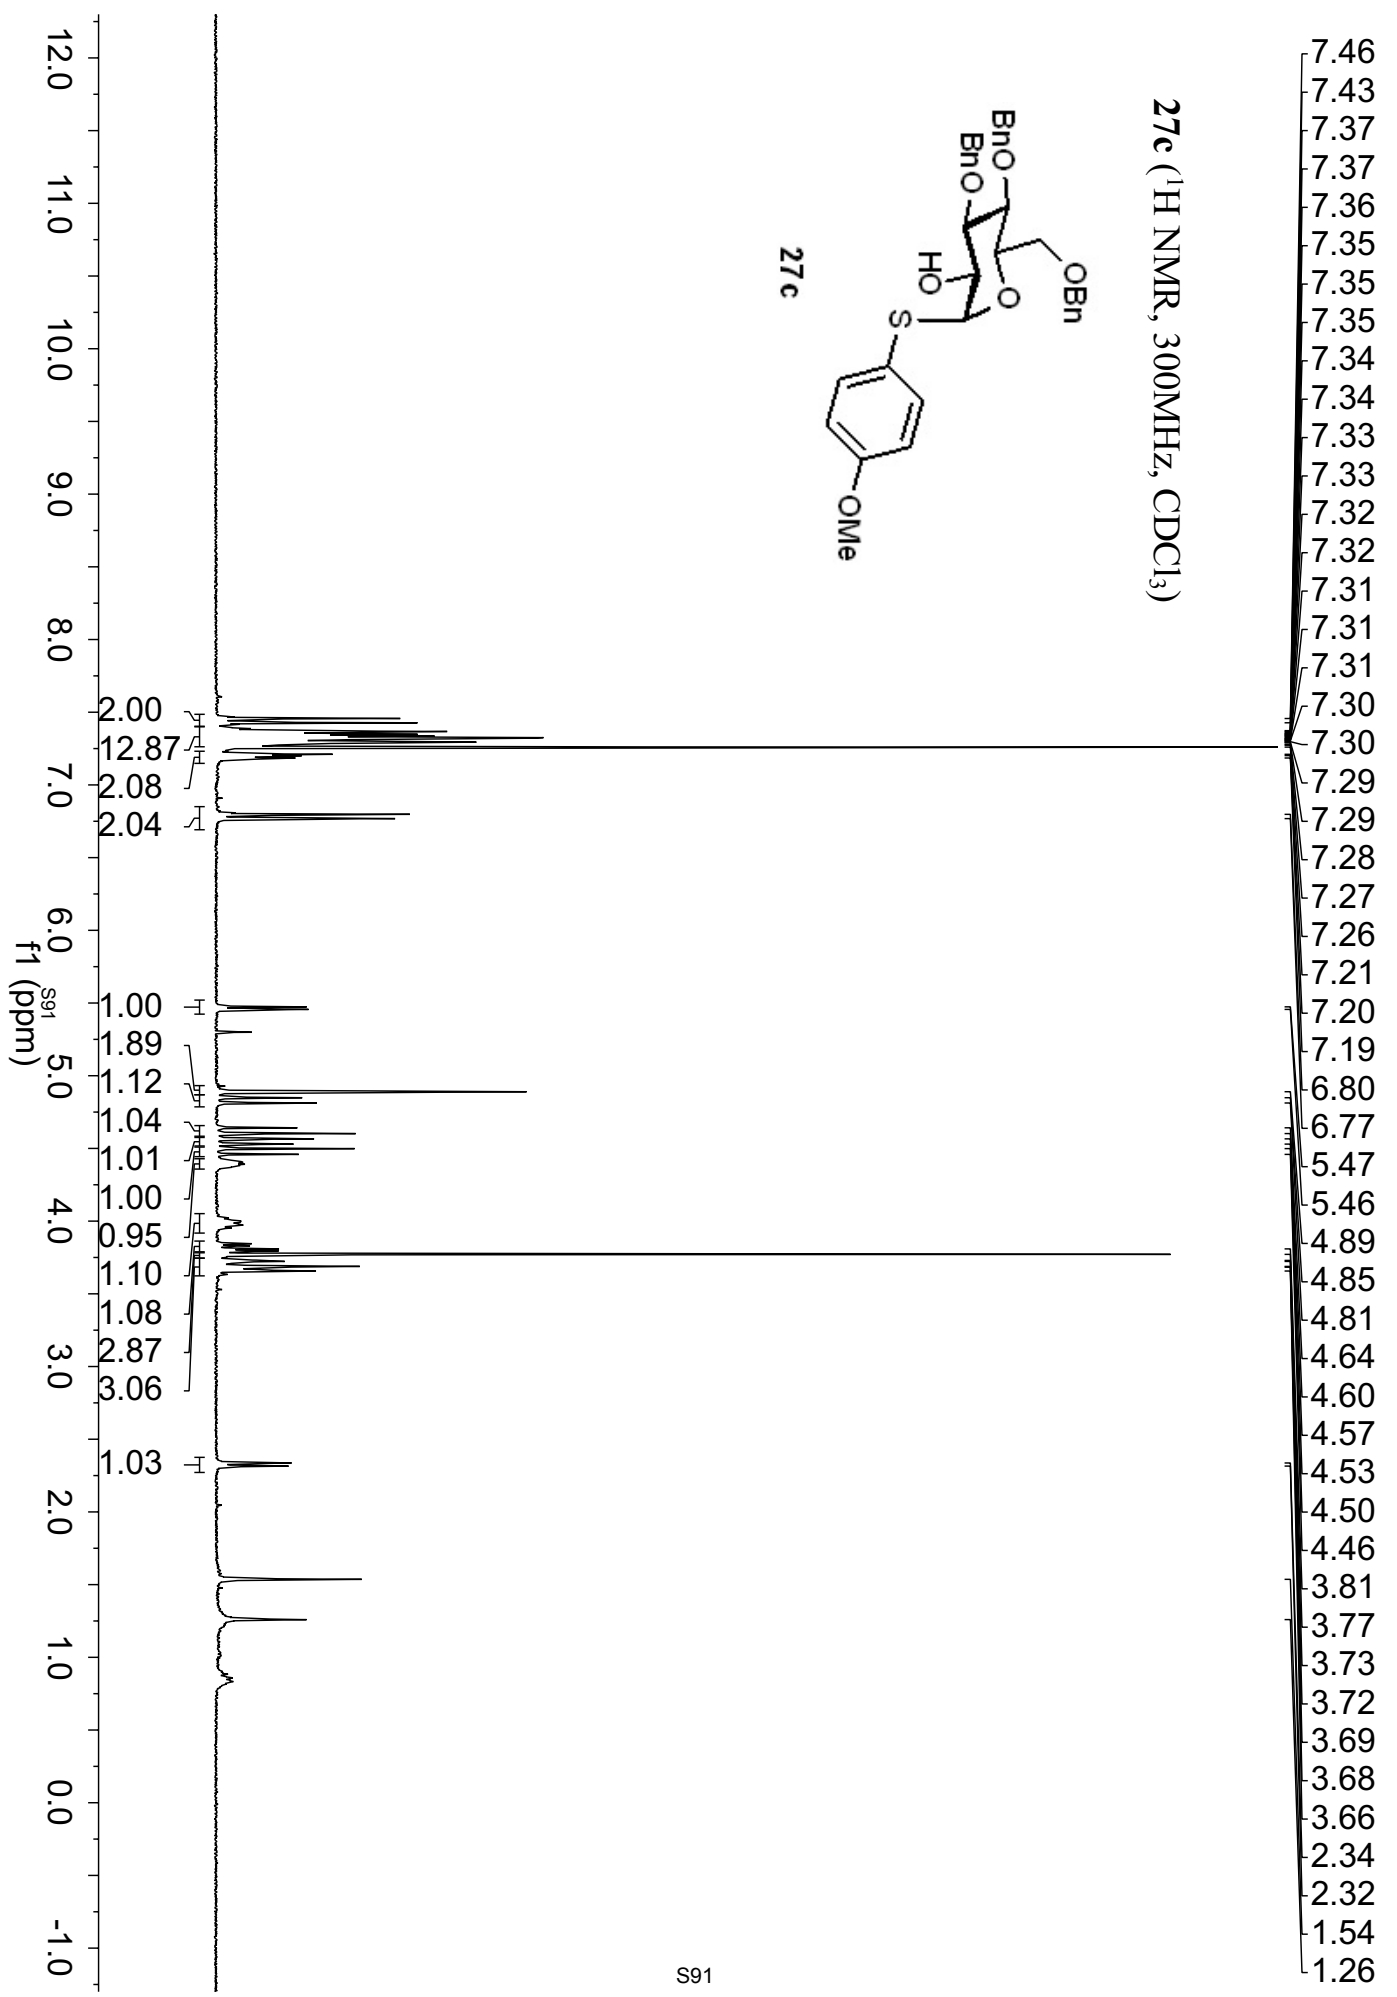

**27c** (<sup>13</sup>C NMR, 75MHz, CDCl<sub>3</sub>)

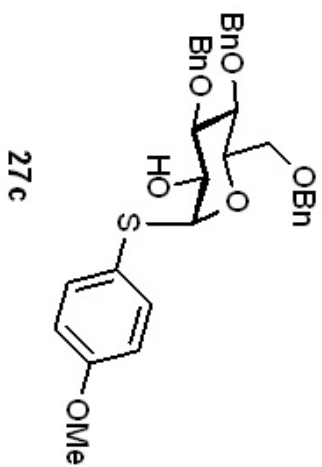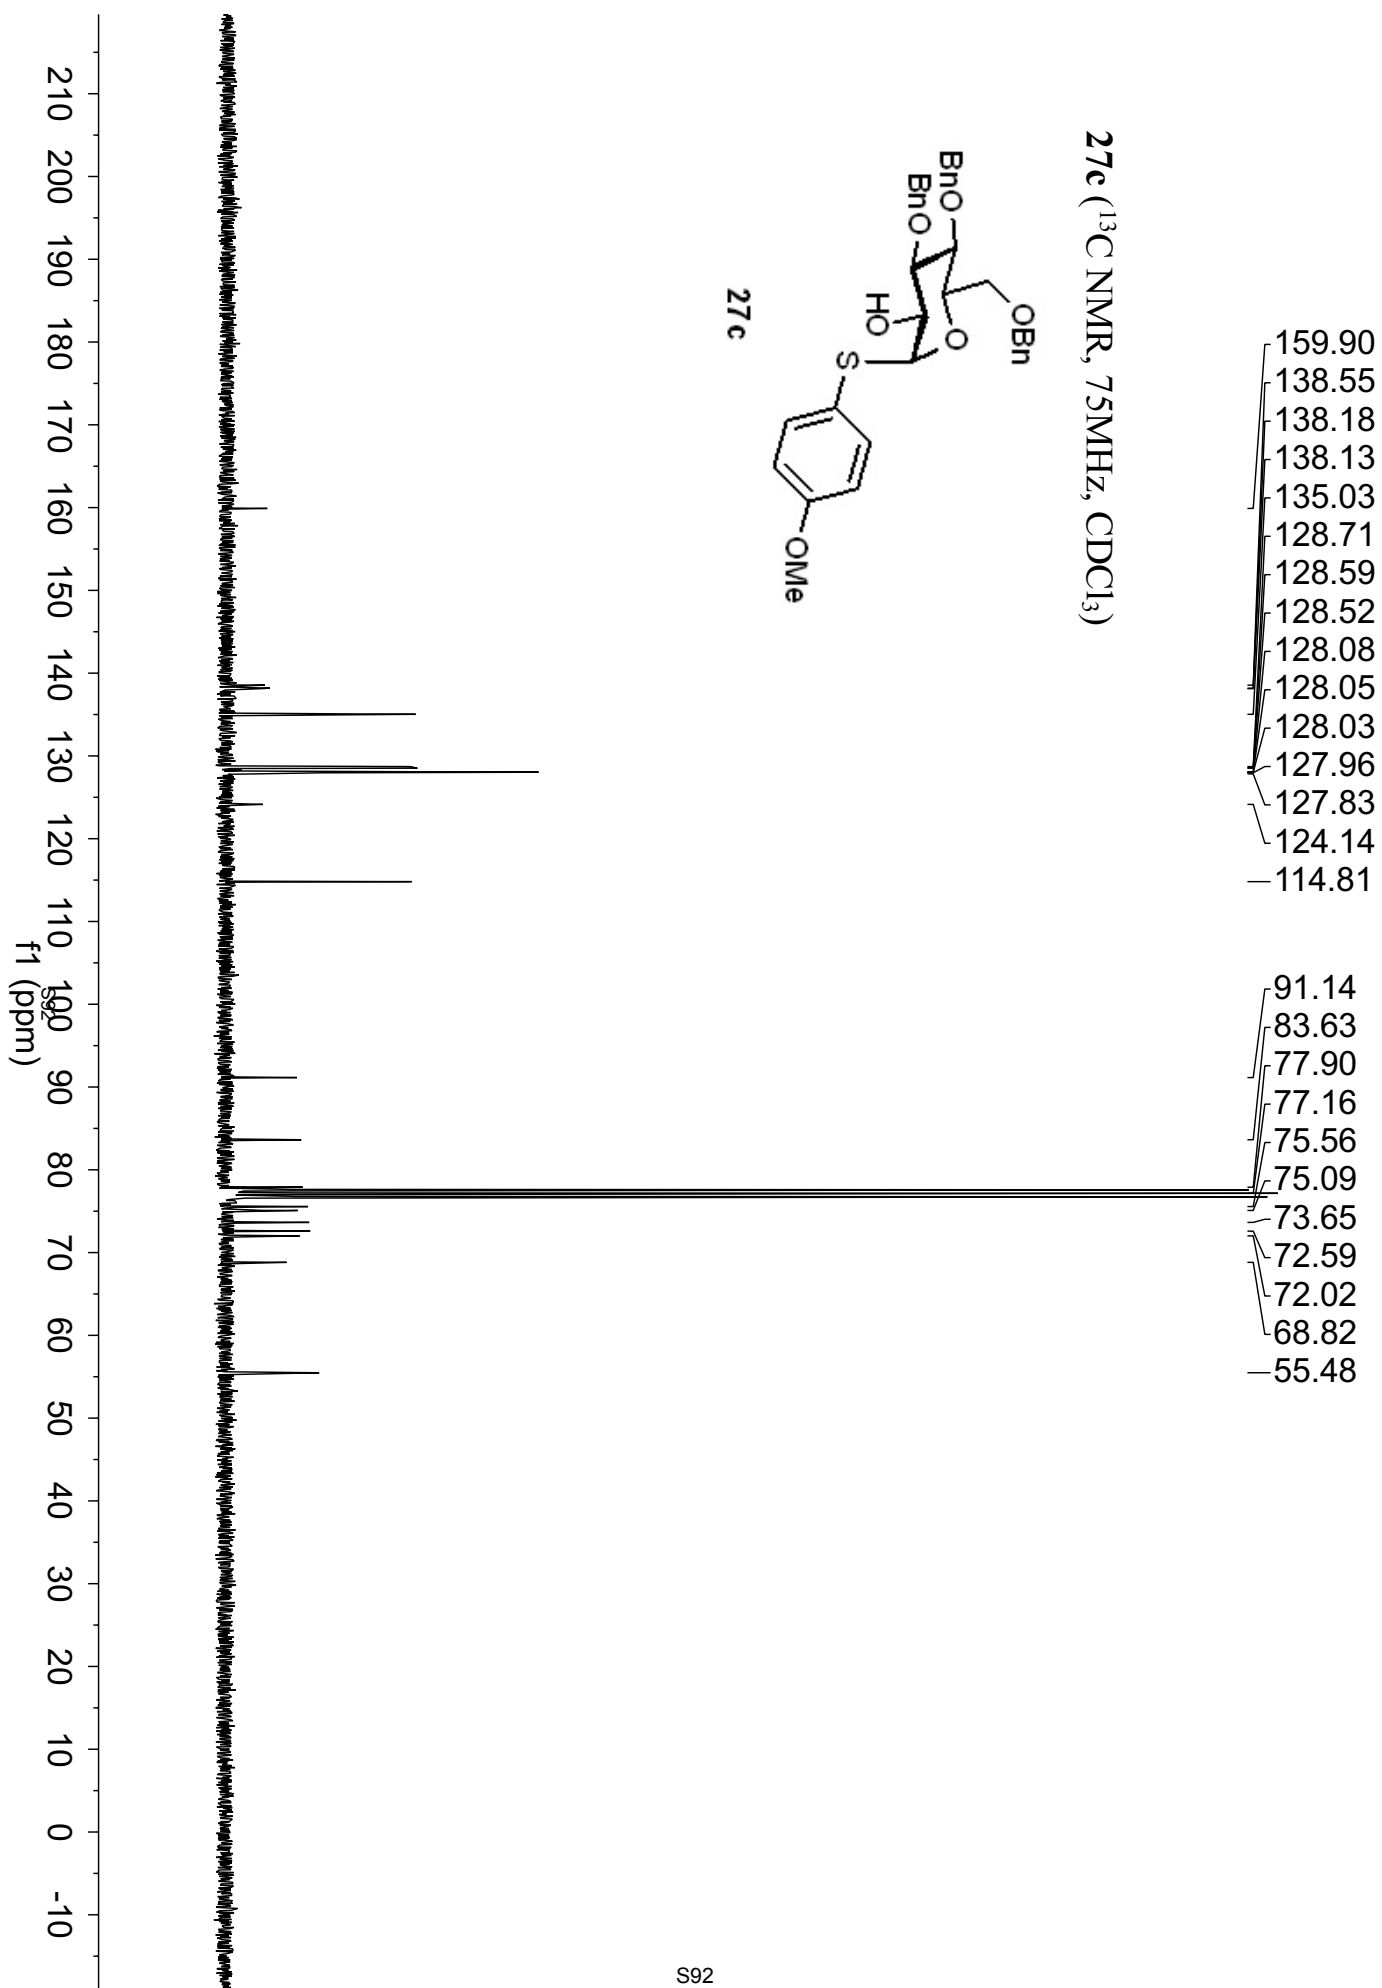

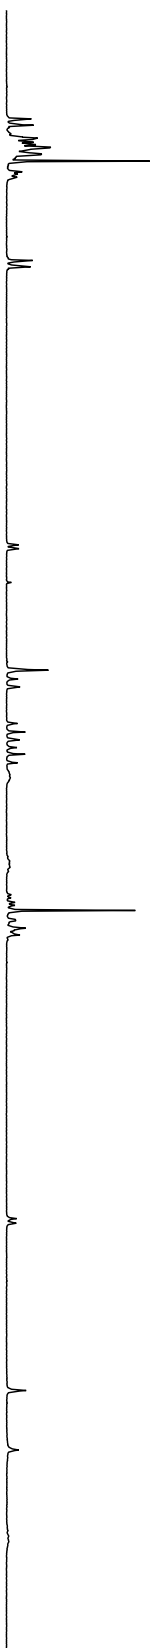

**27c** ( $^1\text{H}$ - $^{13}\text{C}$  Coupled HSQC)

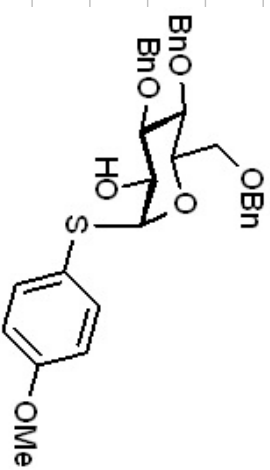

27c

$J = 169$  Hz

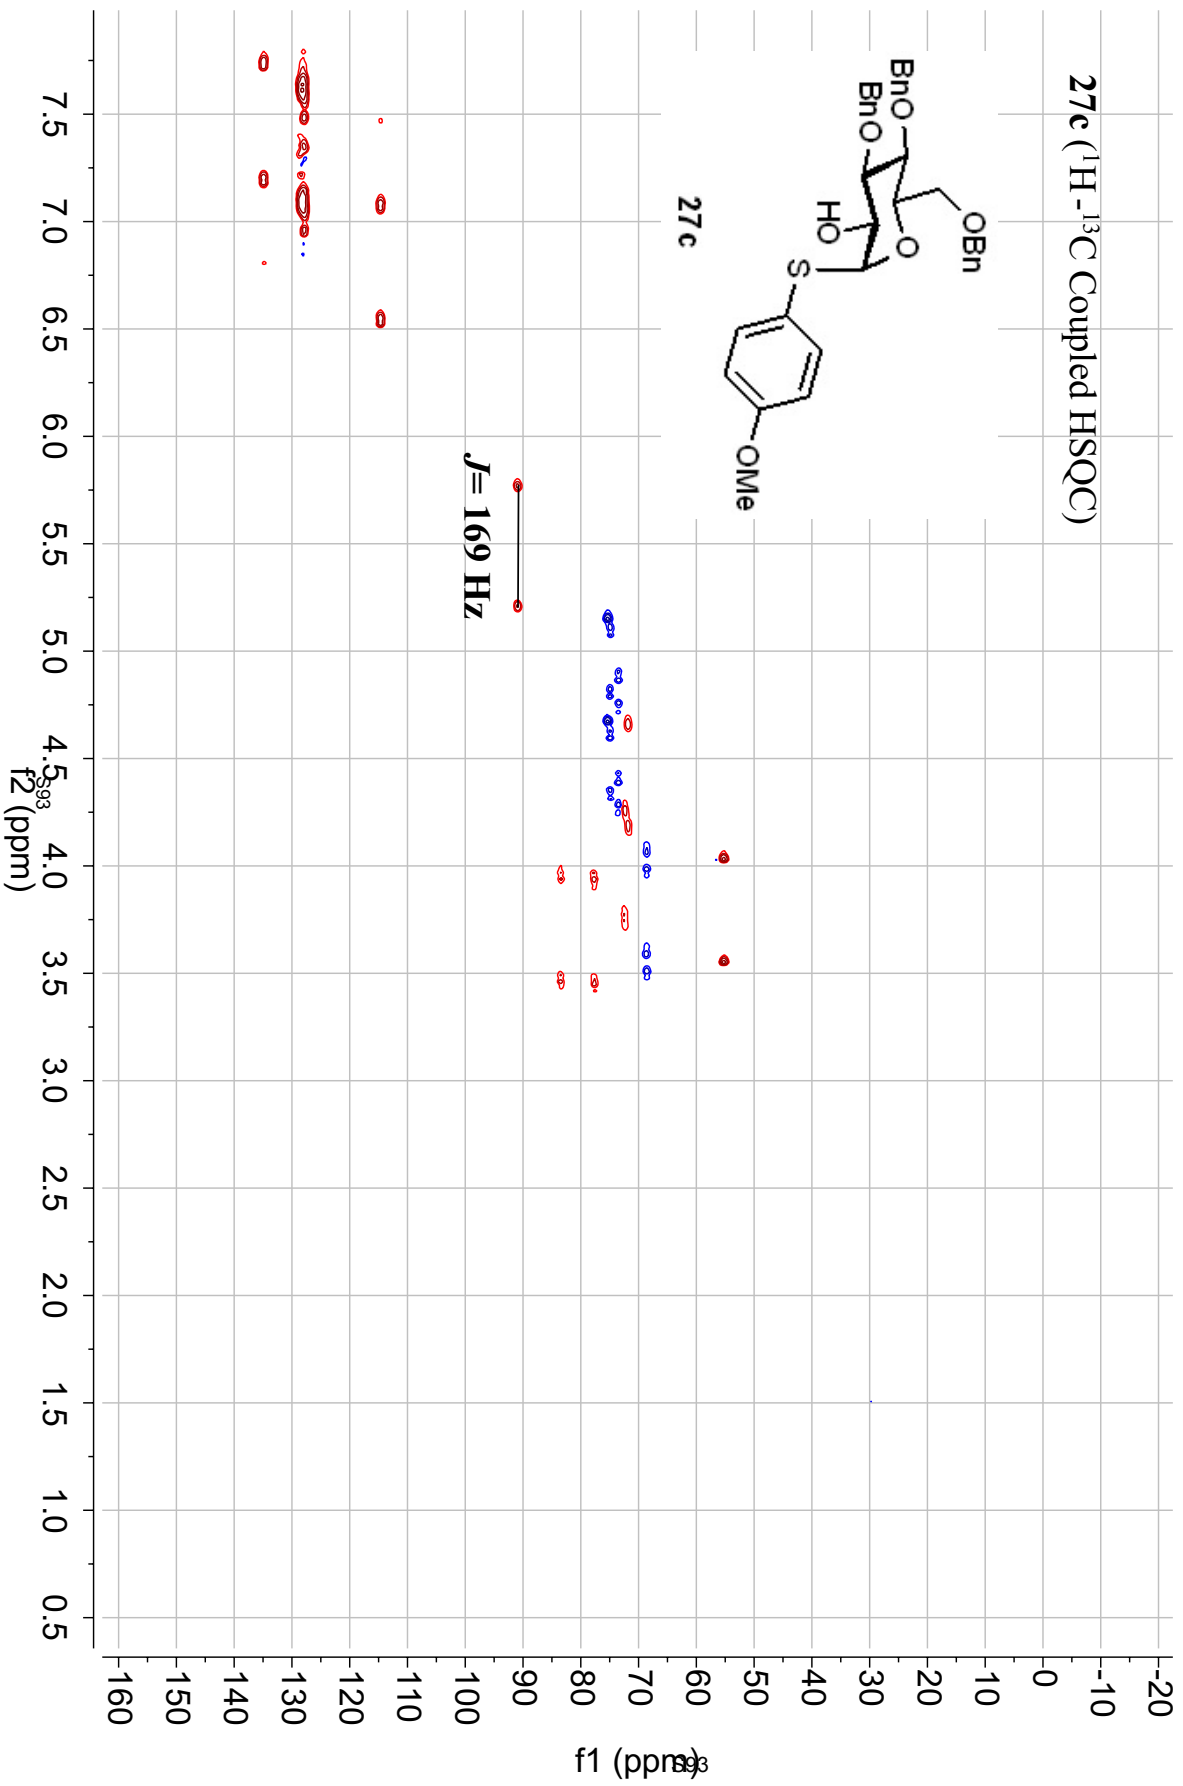

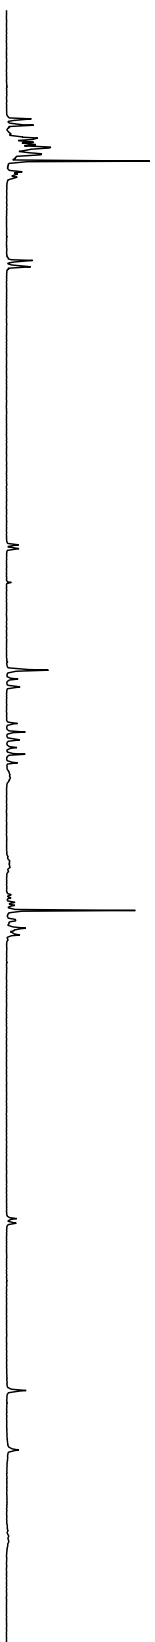

27c ( $^1\text{H}$ - $^{13}\text{C}$  HSQC)

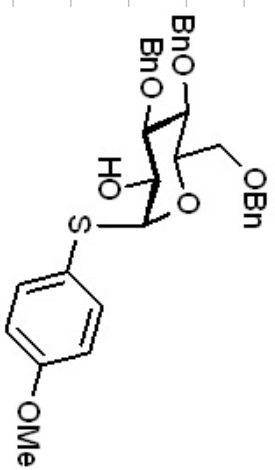

27c

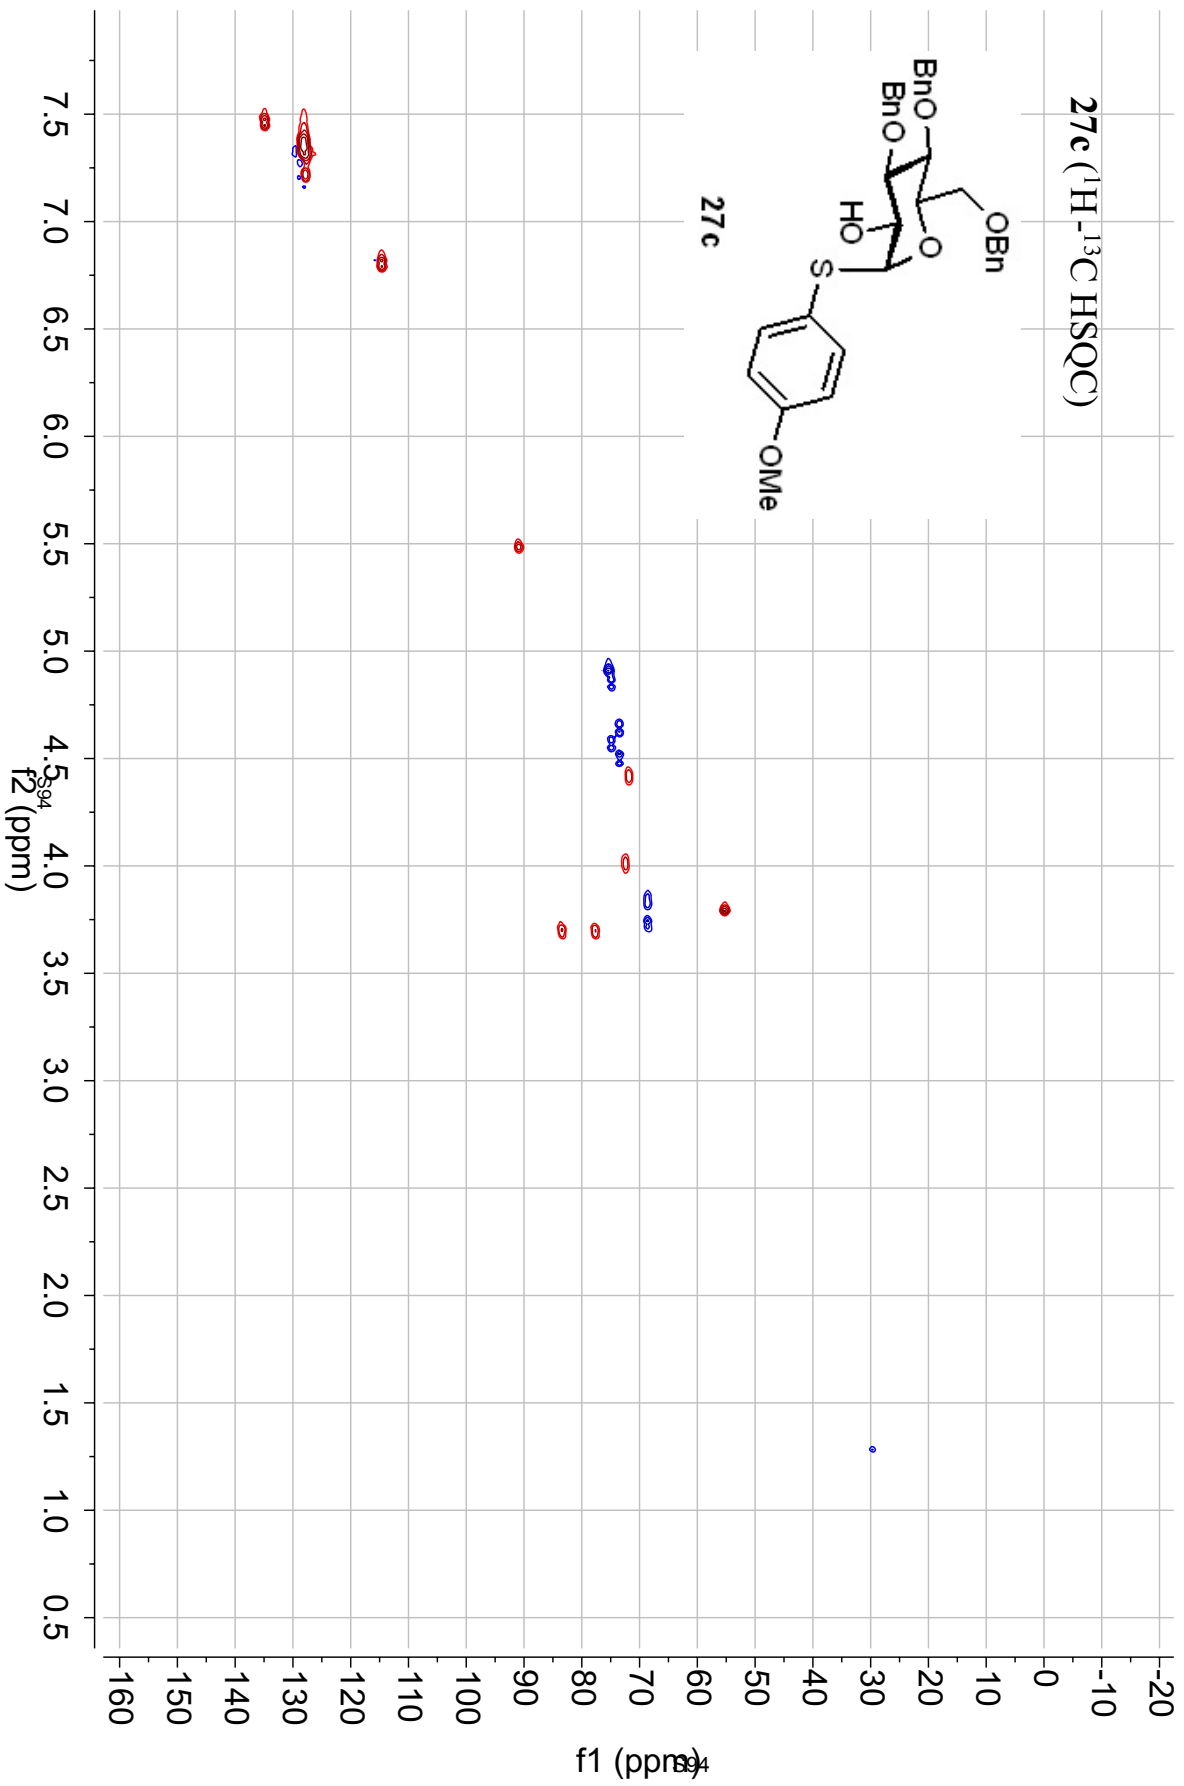

**27d** (<sup>1</sup>H NMR, 300MHz, CDCl<sub>3</sub>)

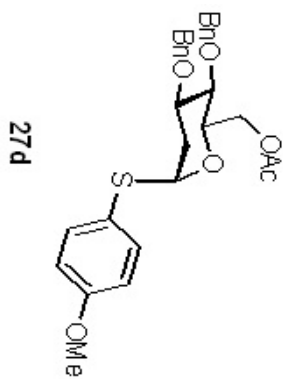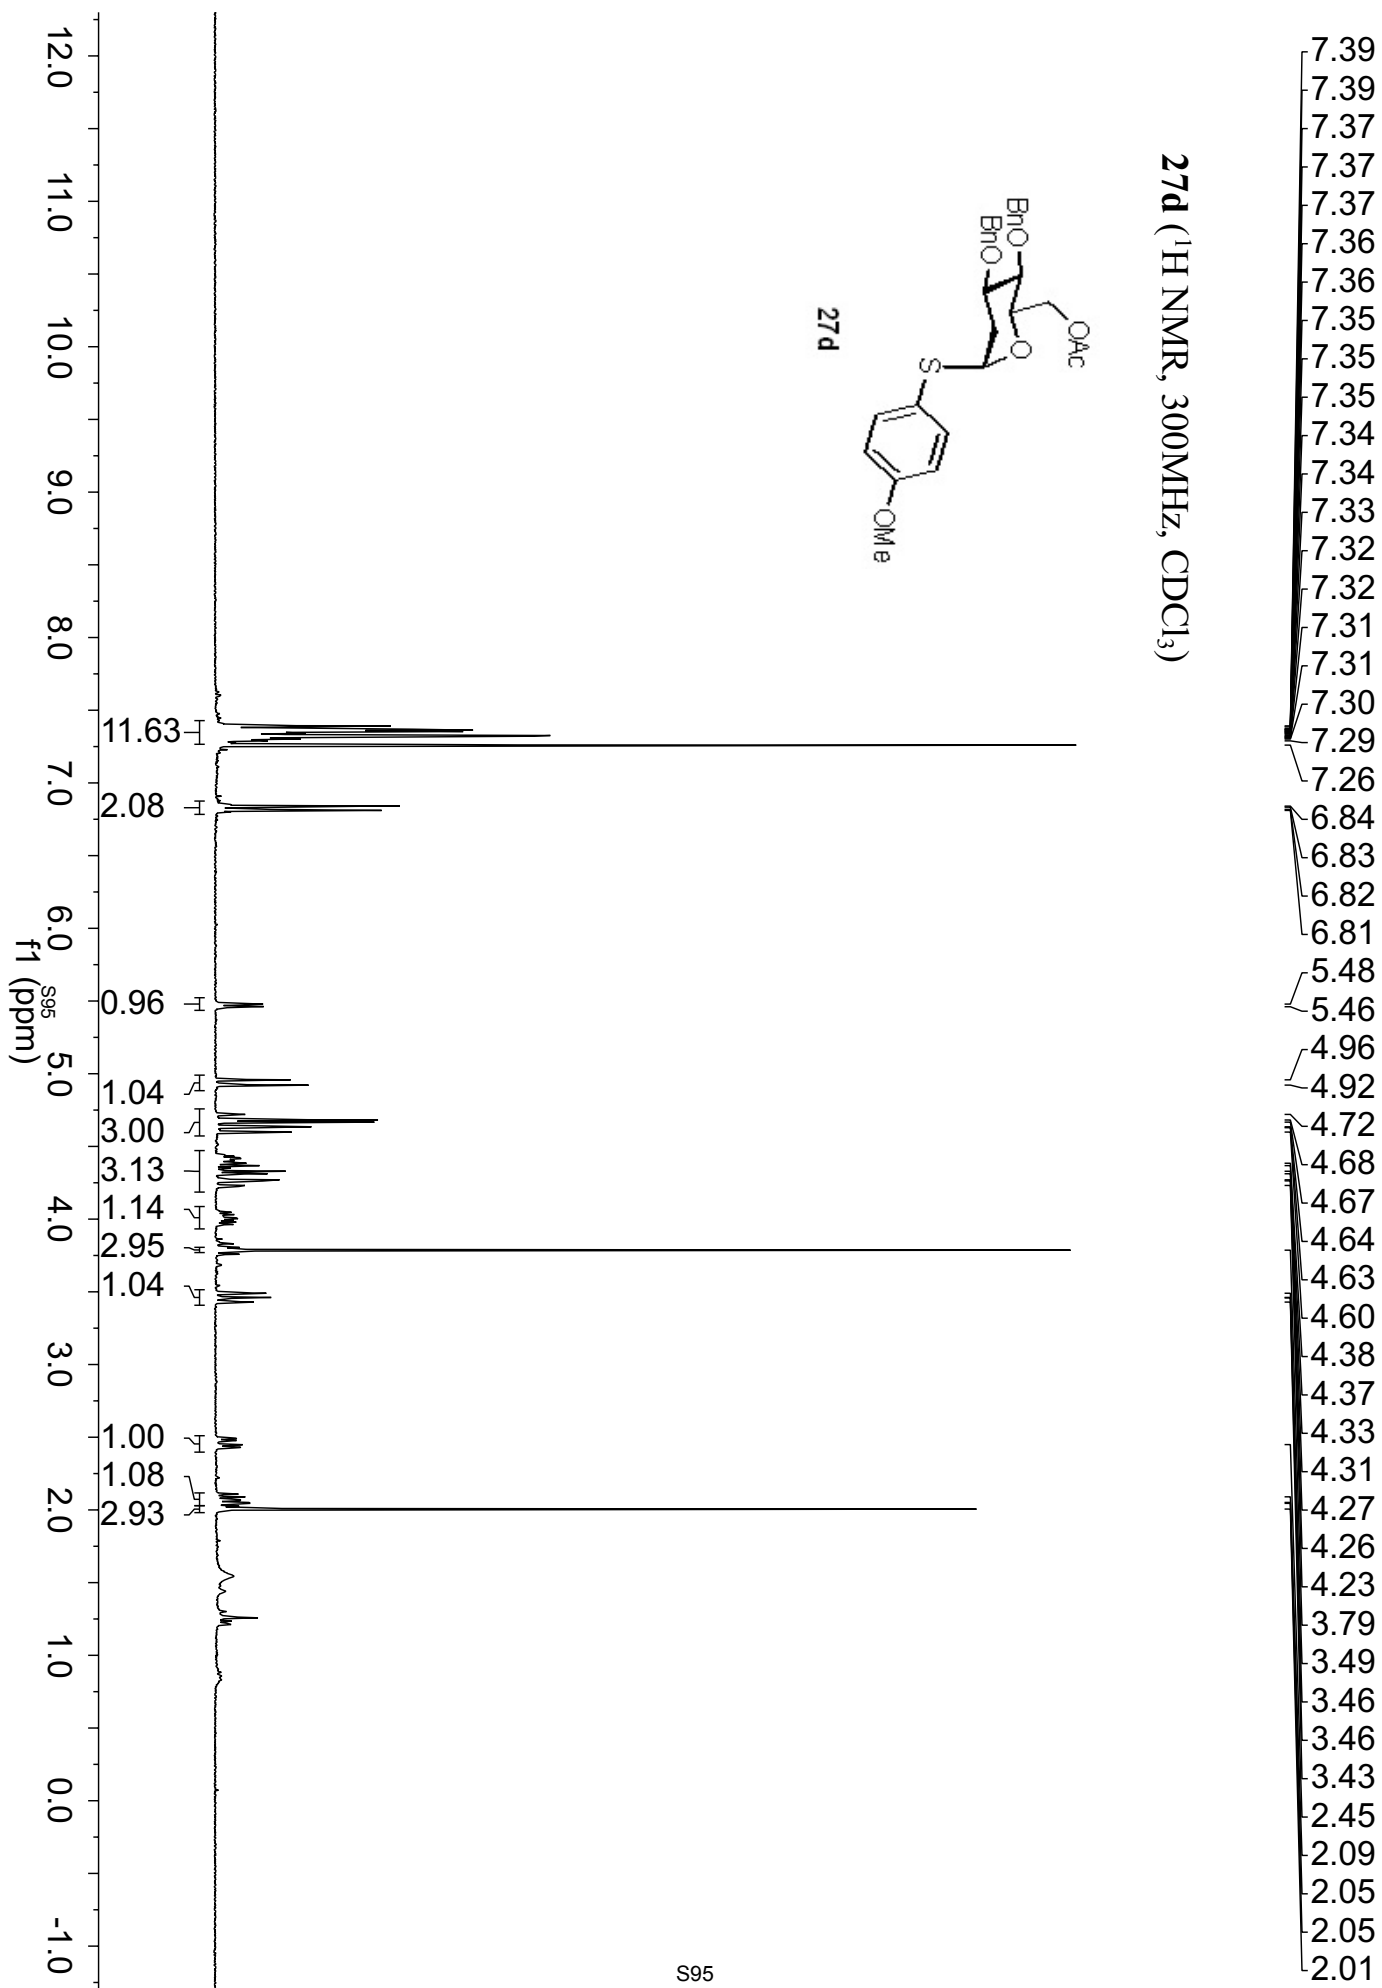

**27d** ( $^{13}\text{C}$  NMR, 75MHz,  $\text{CDCl}_3$ )

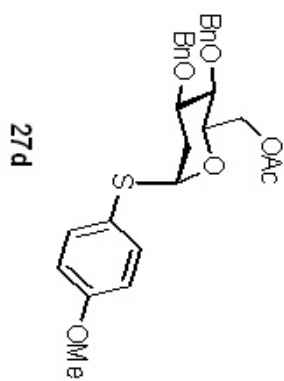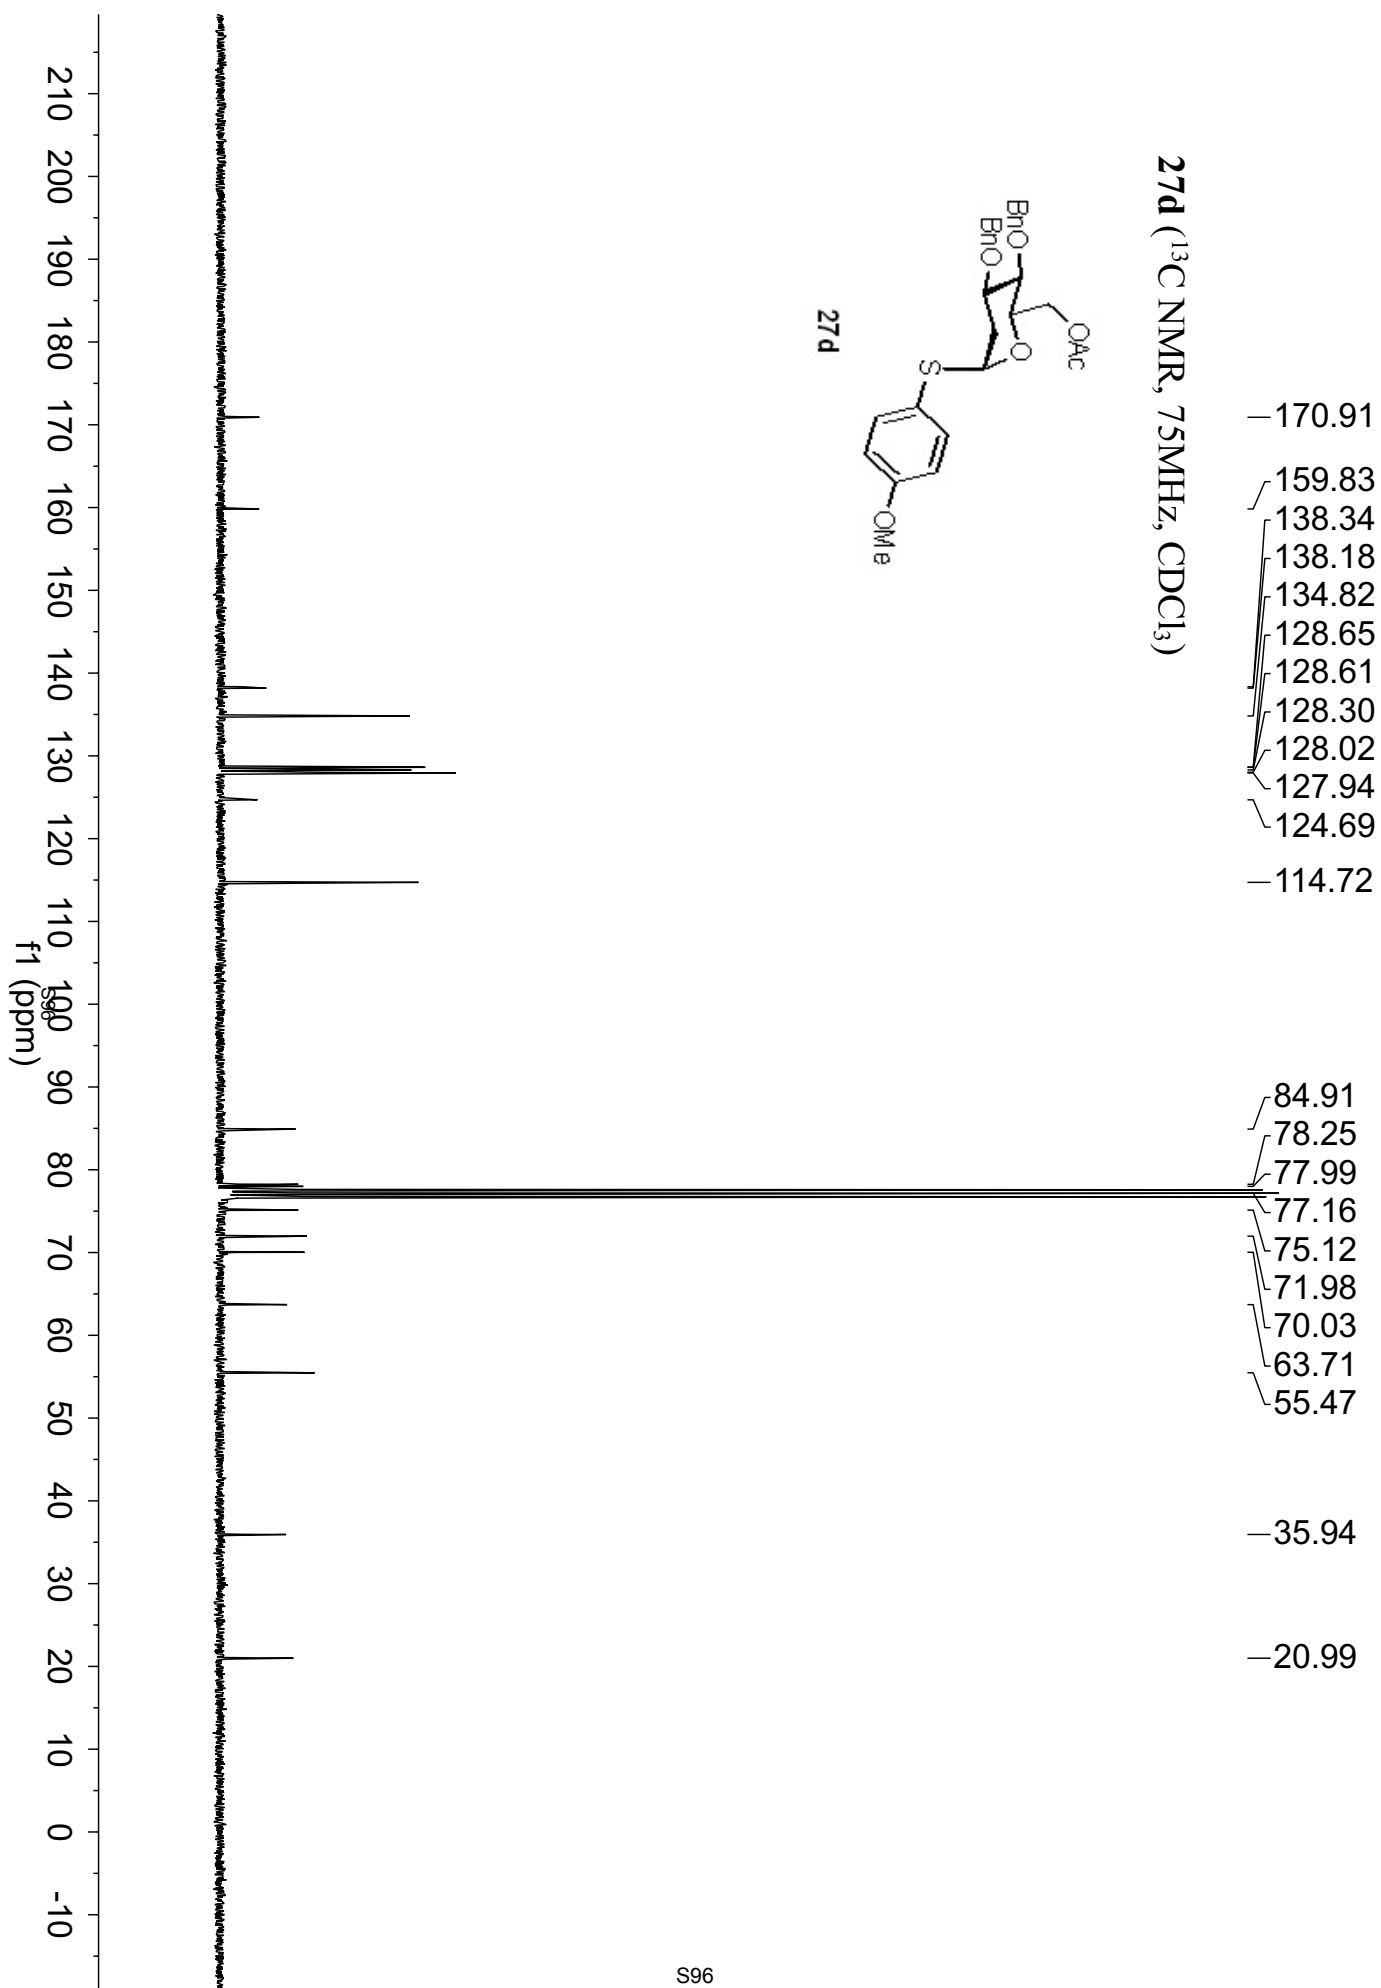



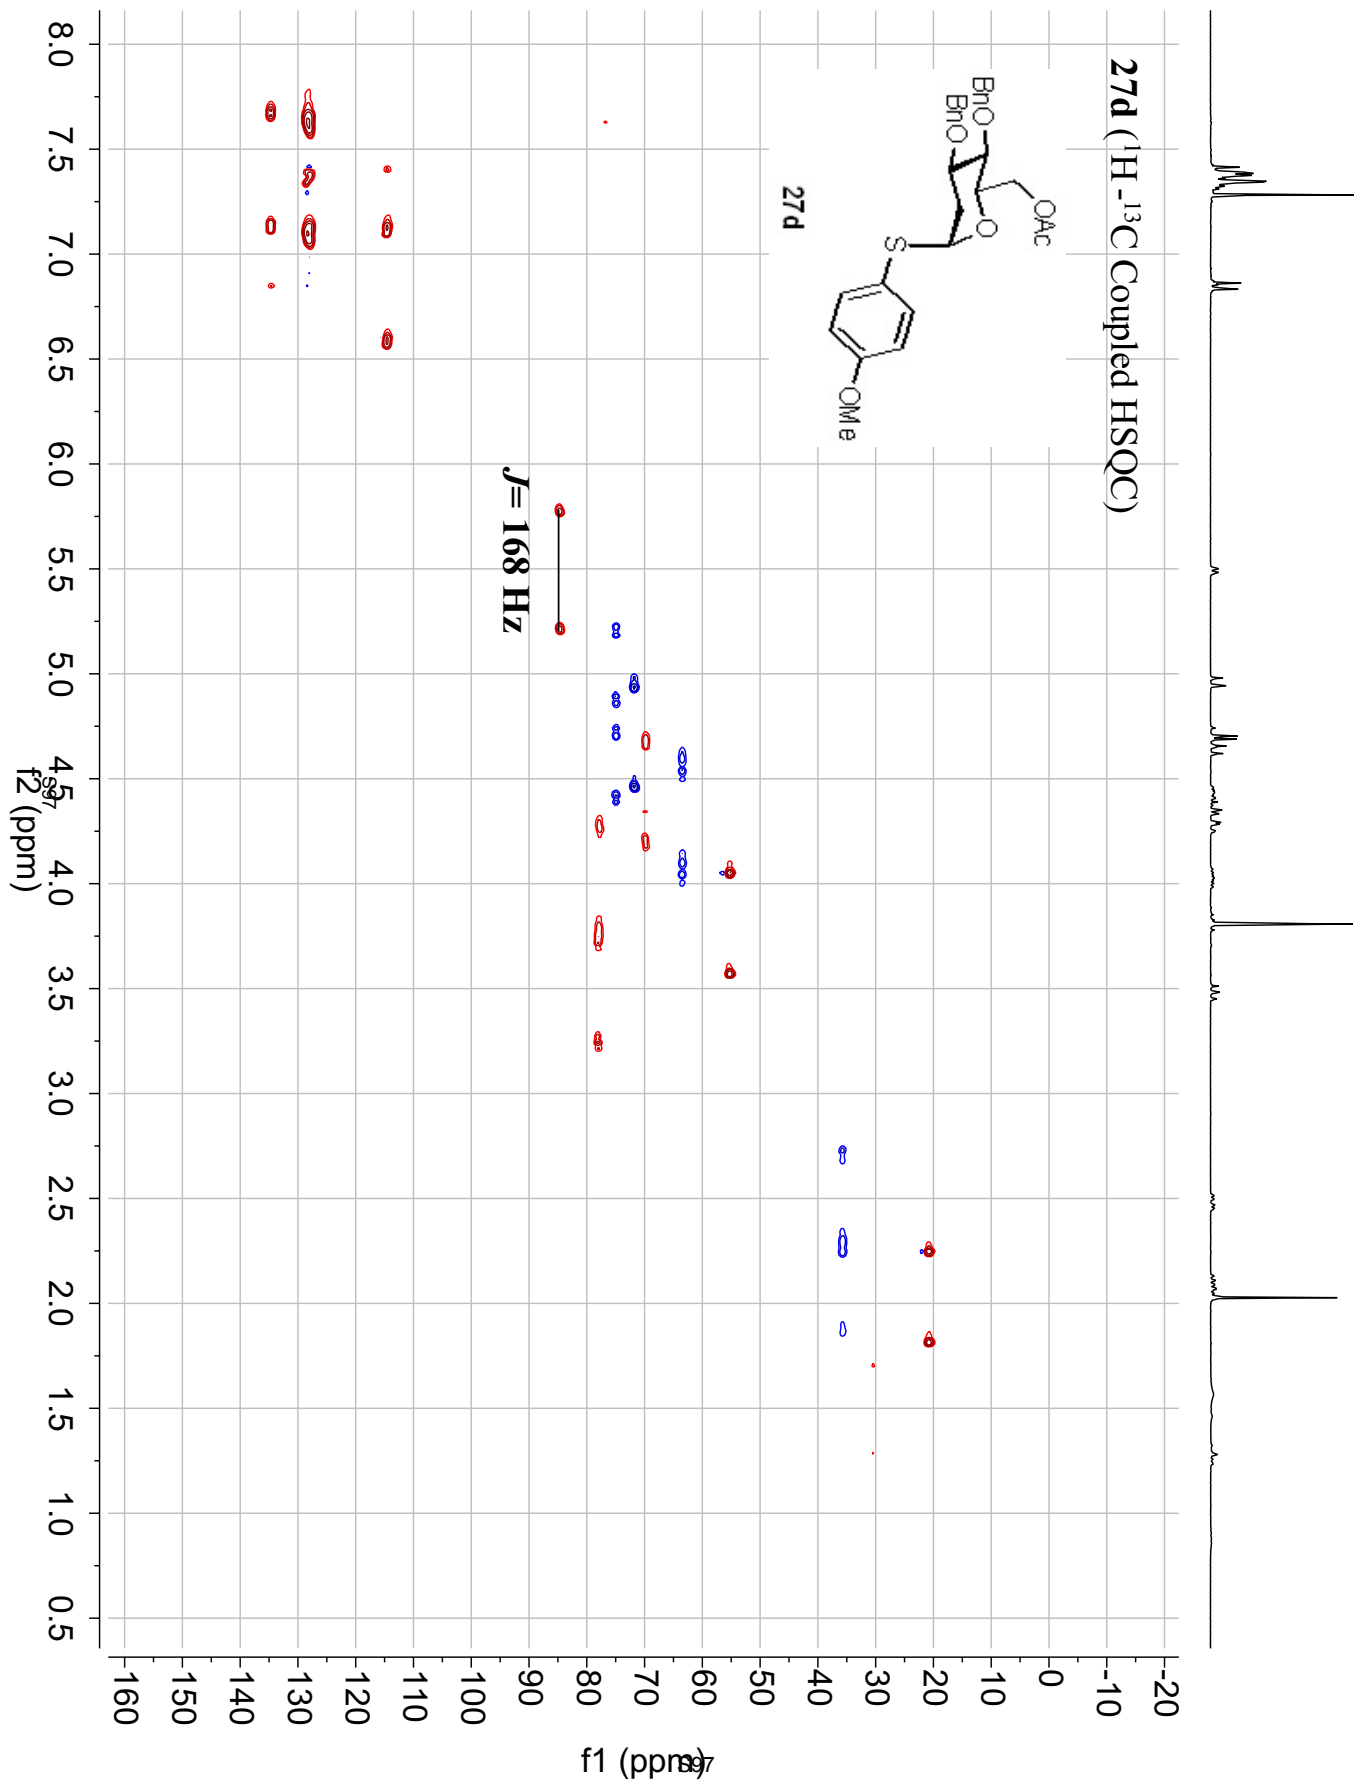

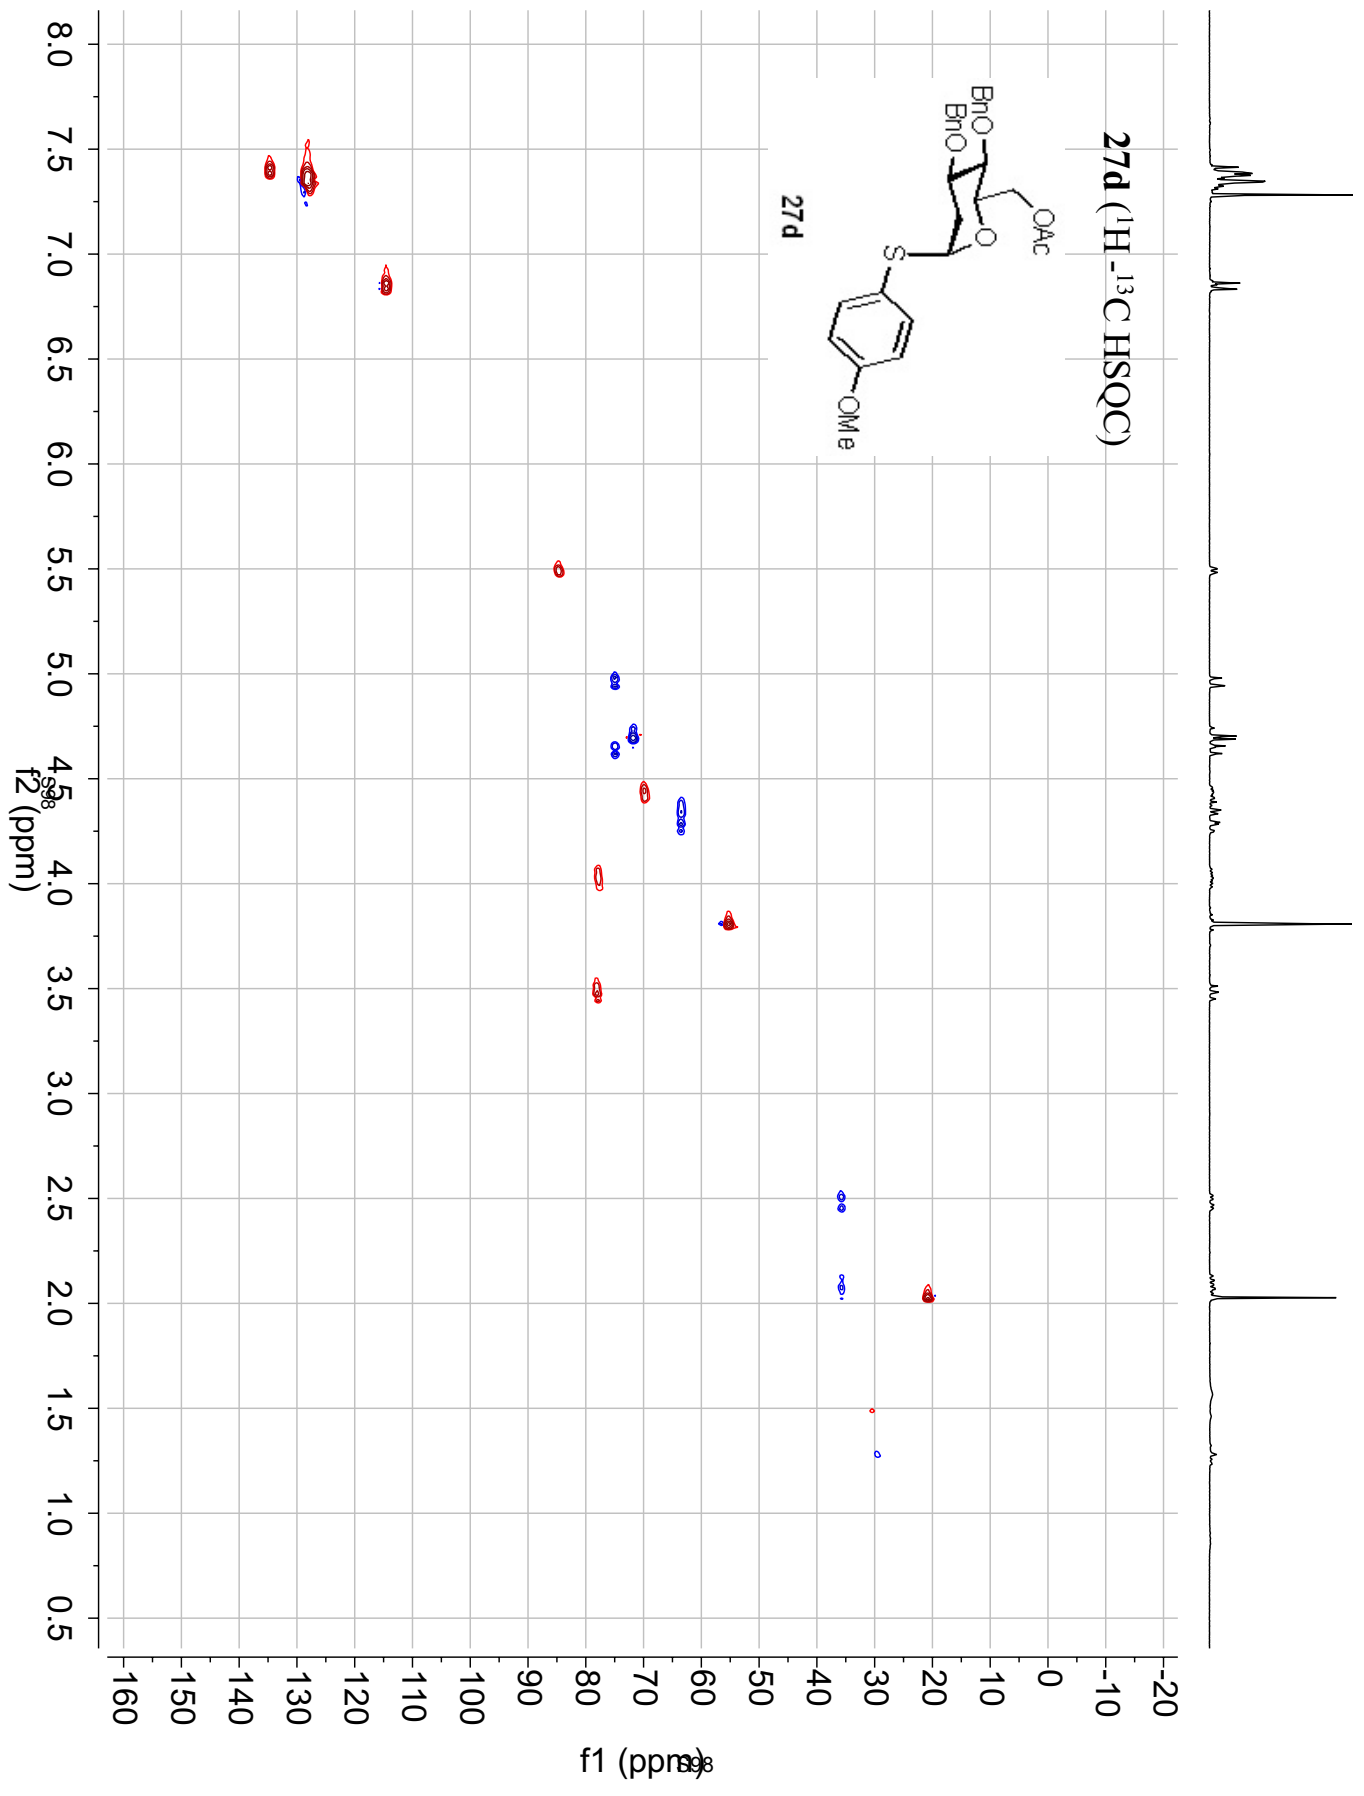

27e (<sup>1</sup>H NMR, 300MHz, CDCl<sub>3</sub>)

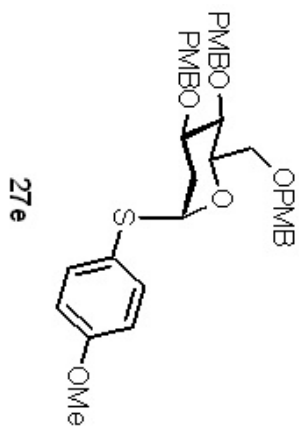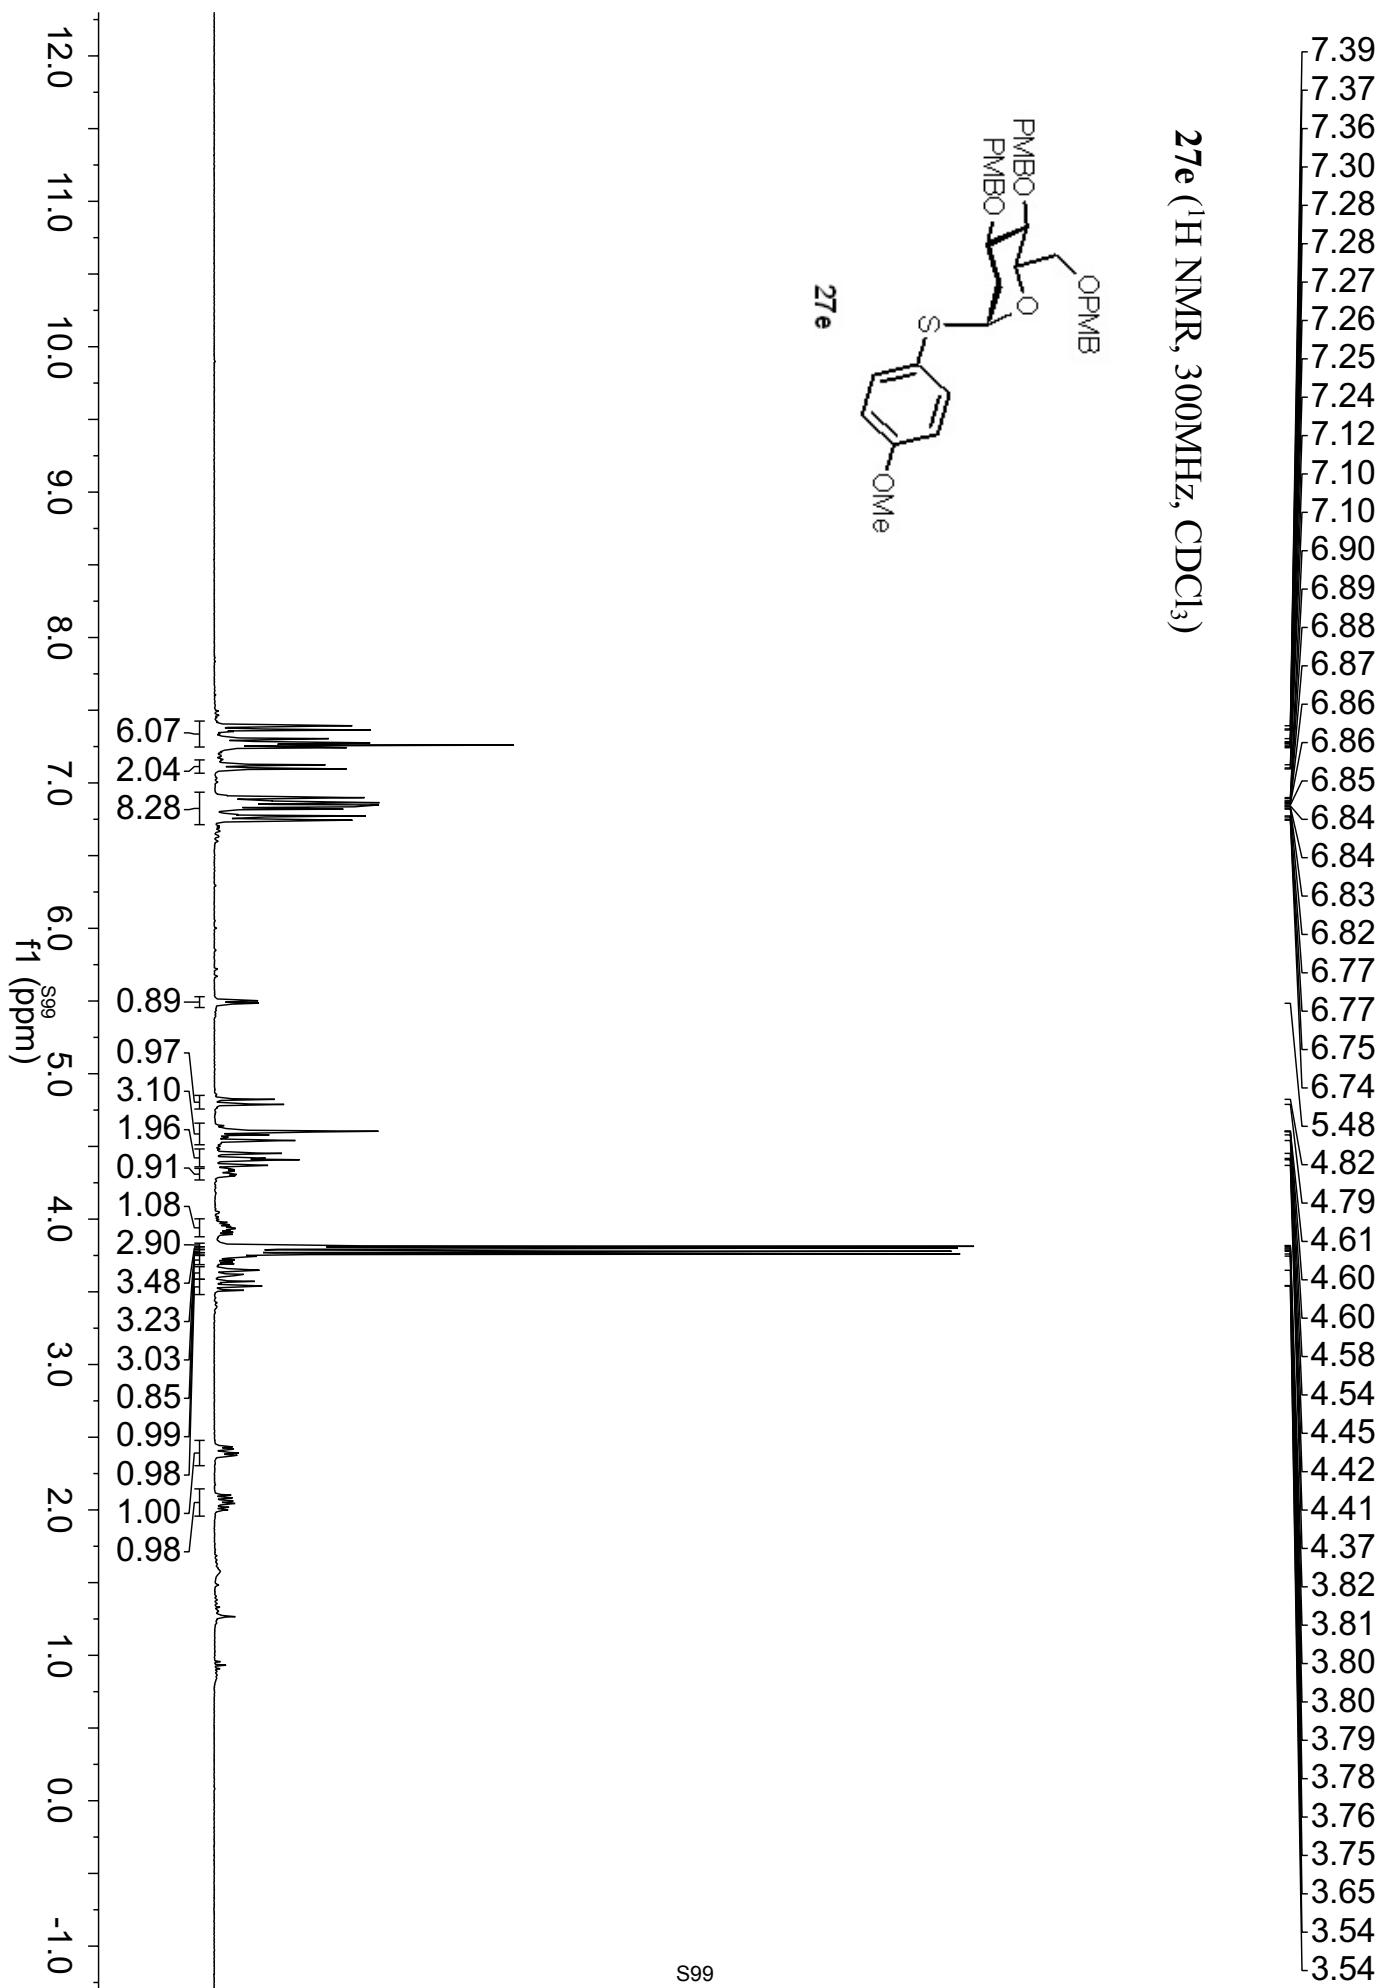

**27e** ( $^{13}\text{C}$  NMR, 75MHz,  $\text{CDCl}_3$ )

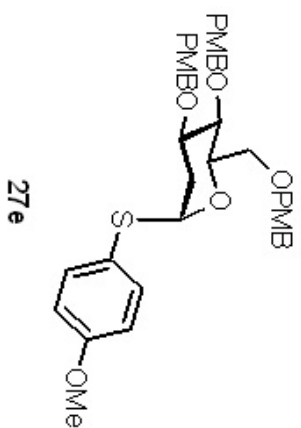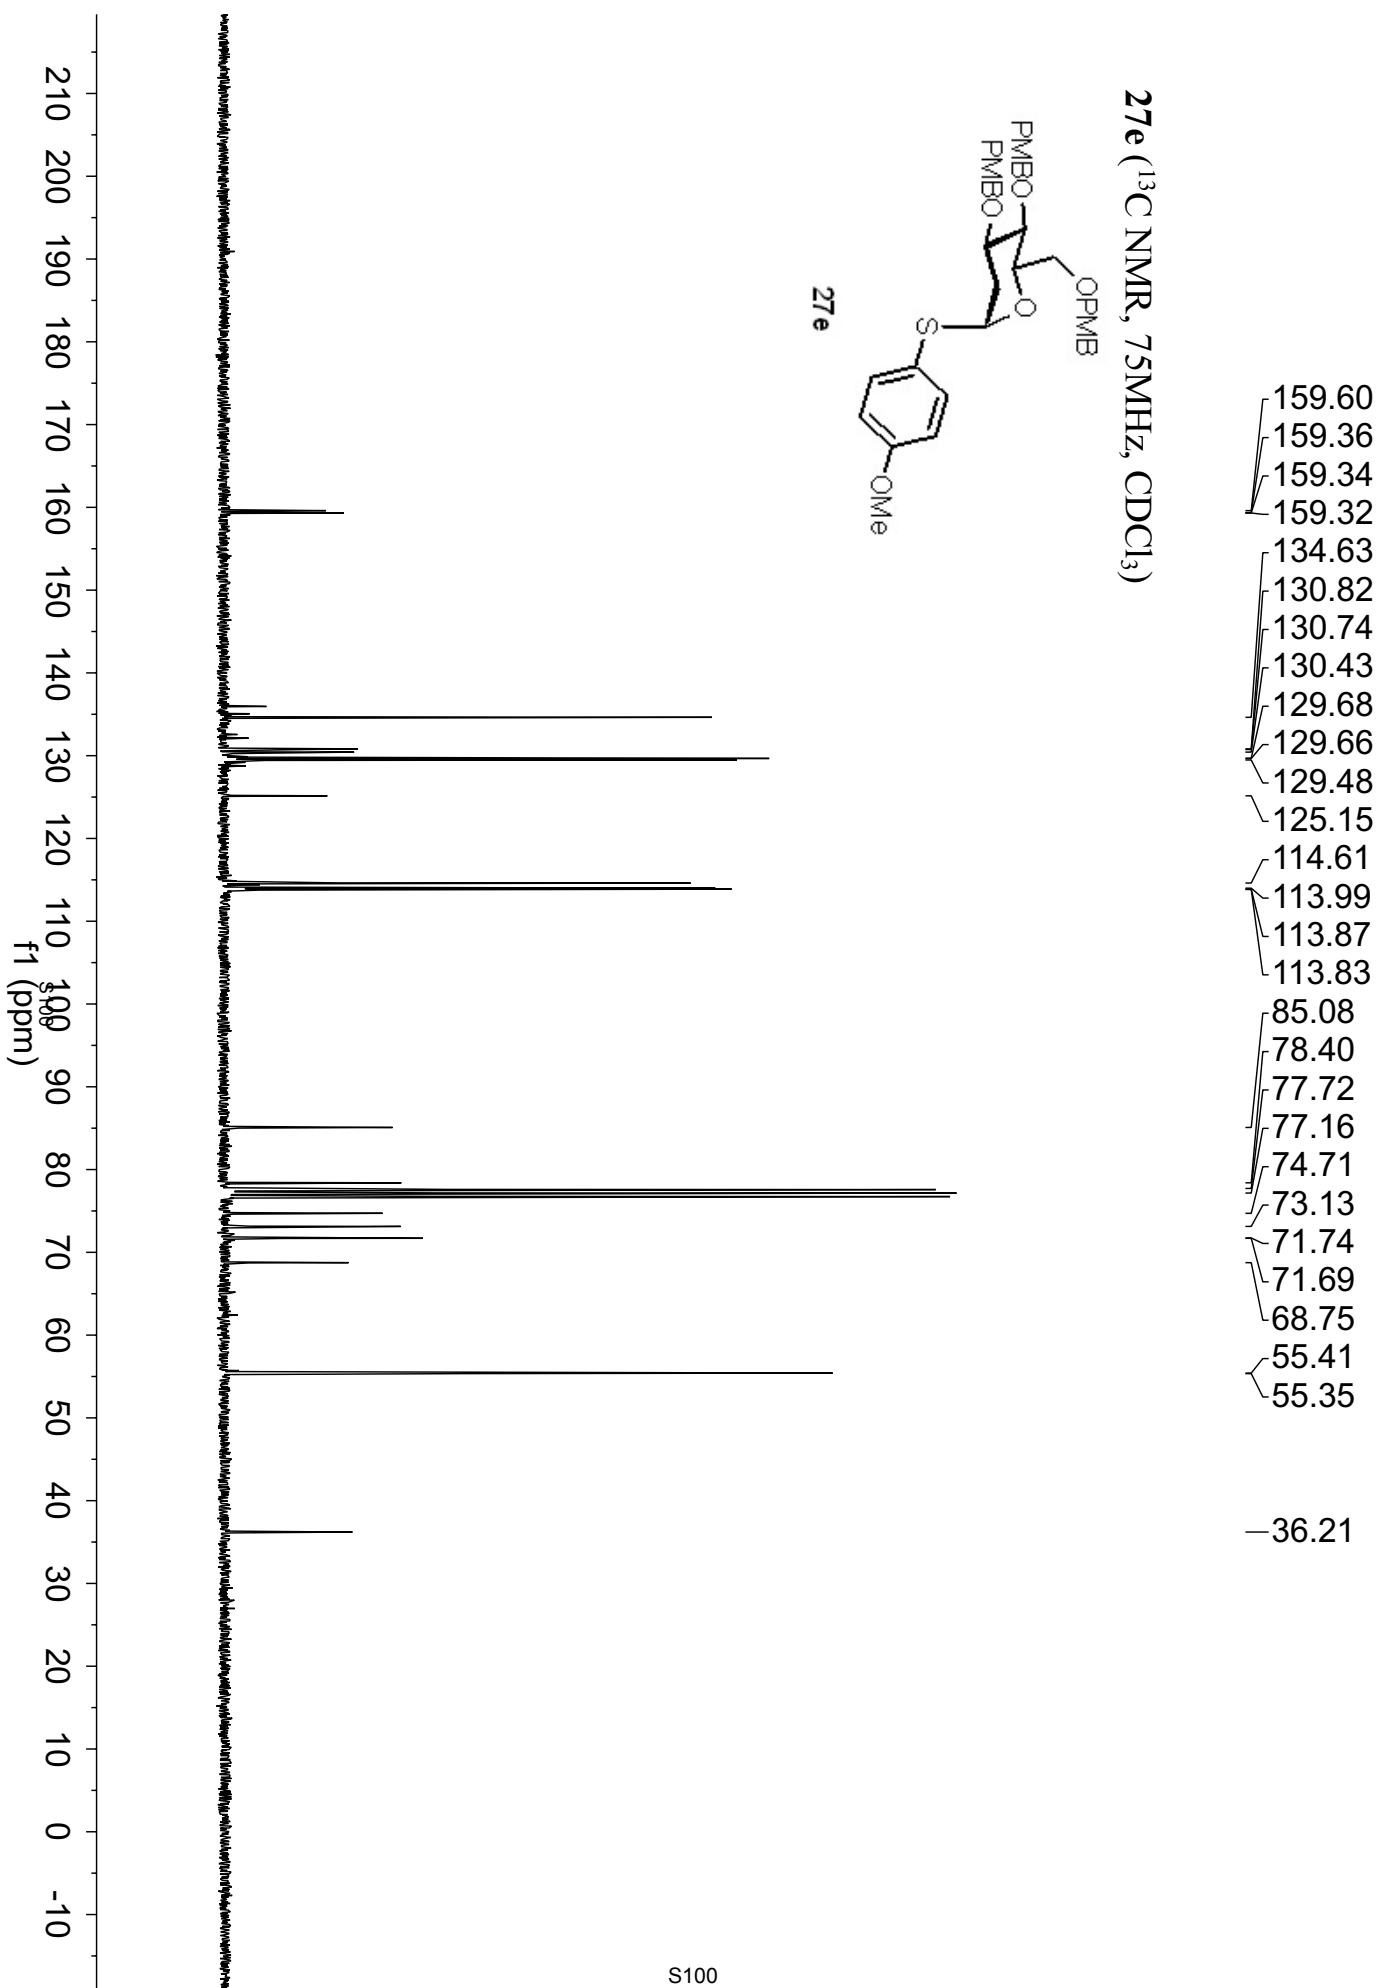

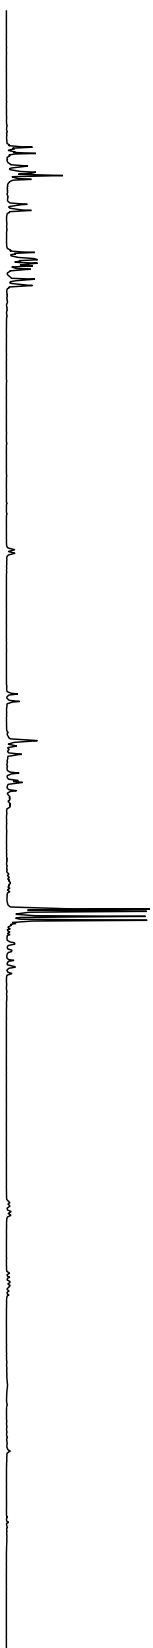

**27e** ( $^1\text{H}$ - $^{13}\text{C}$  Coupled HSQC)

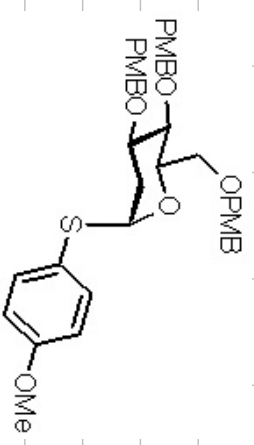

27e

$J = 167 \text{ Hz}$

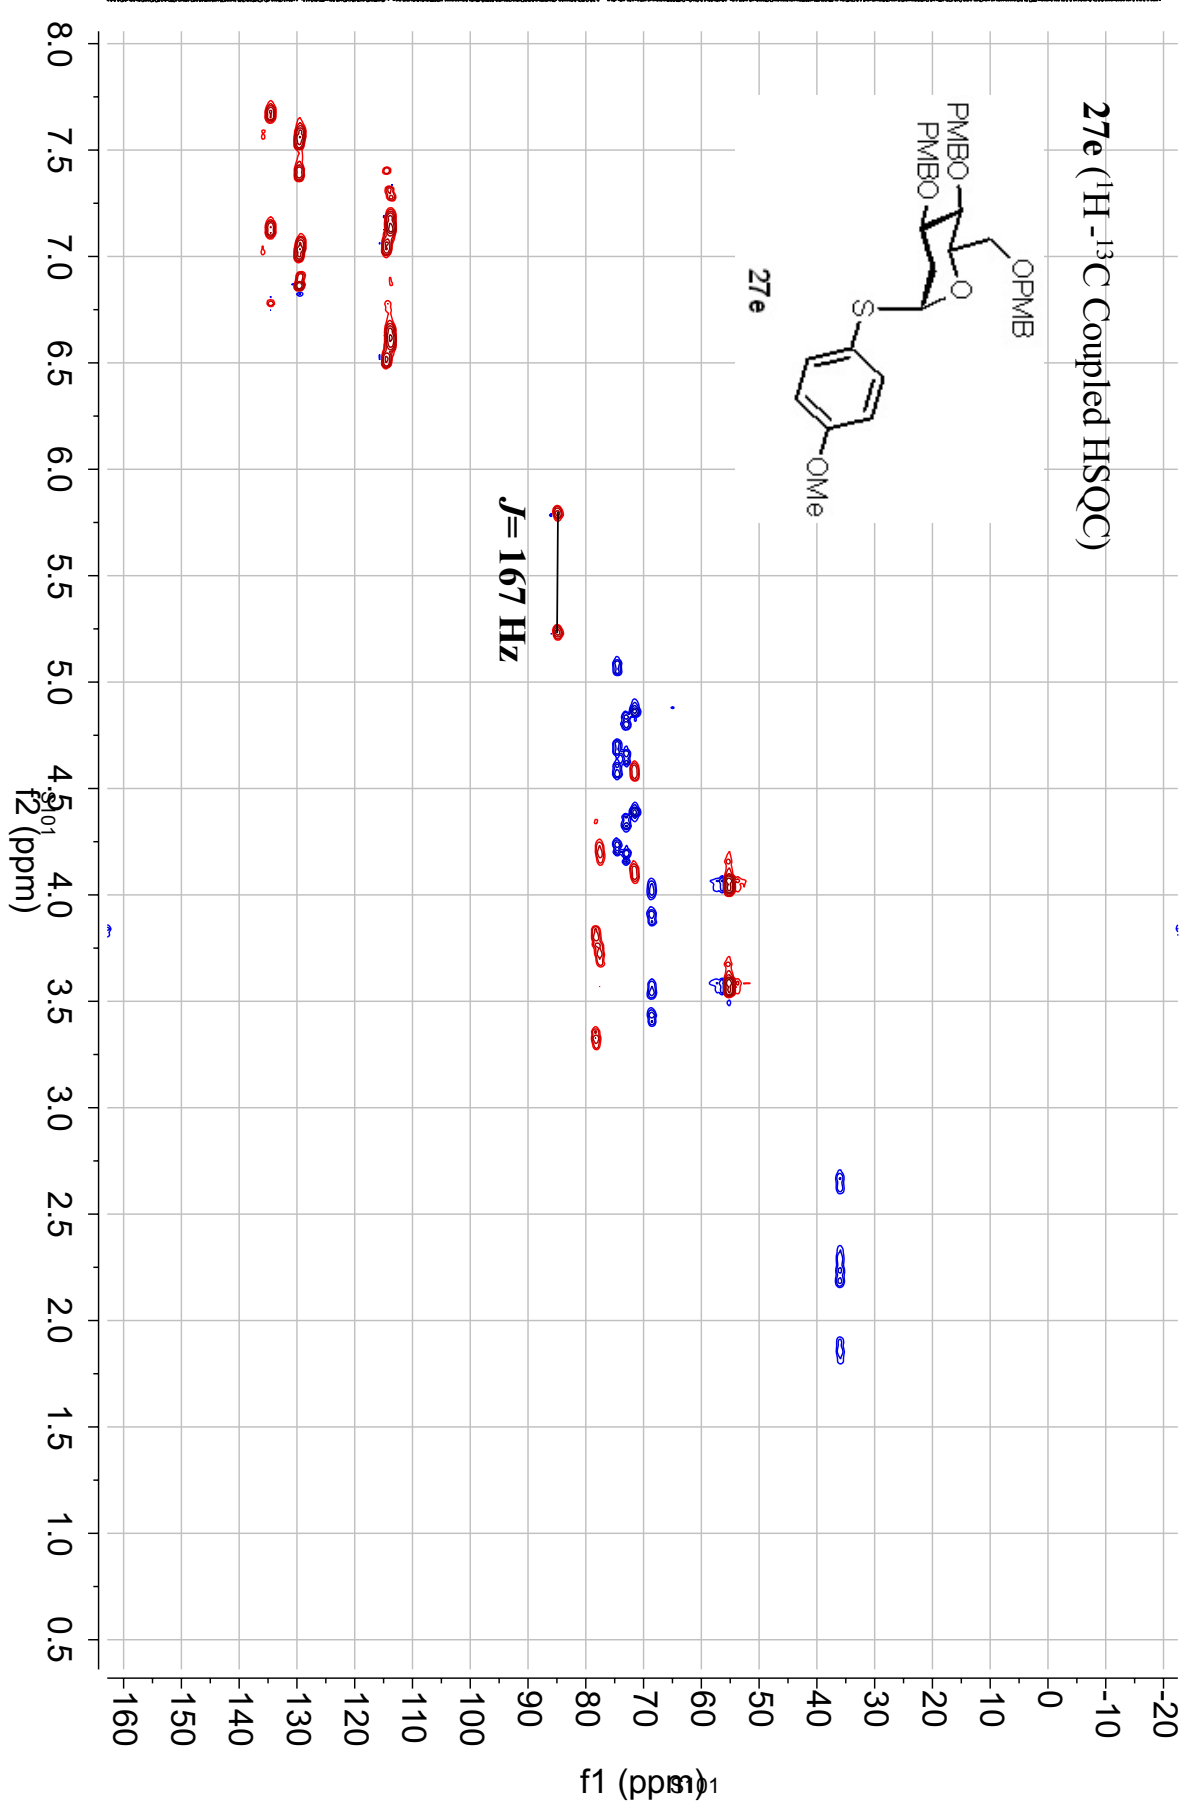

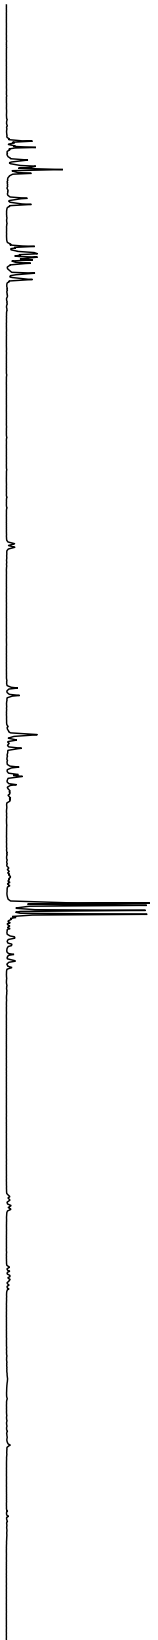

**27e** ( $^1\text{H}$ - $^{13}\text{C}$  HSQC)

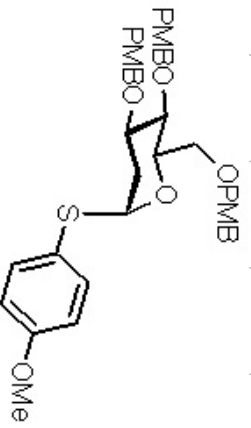

27e

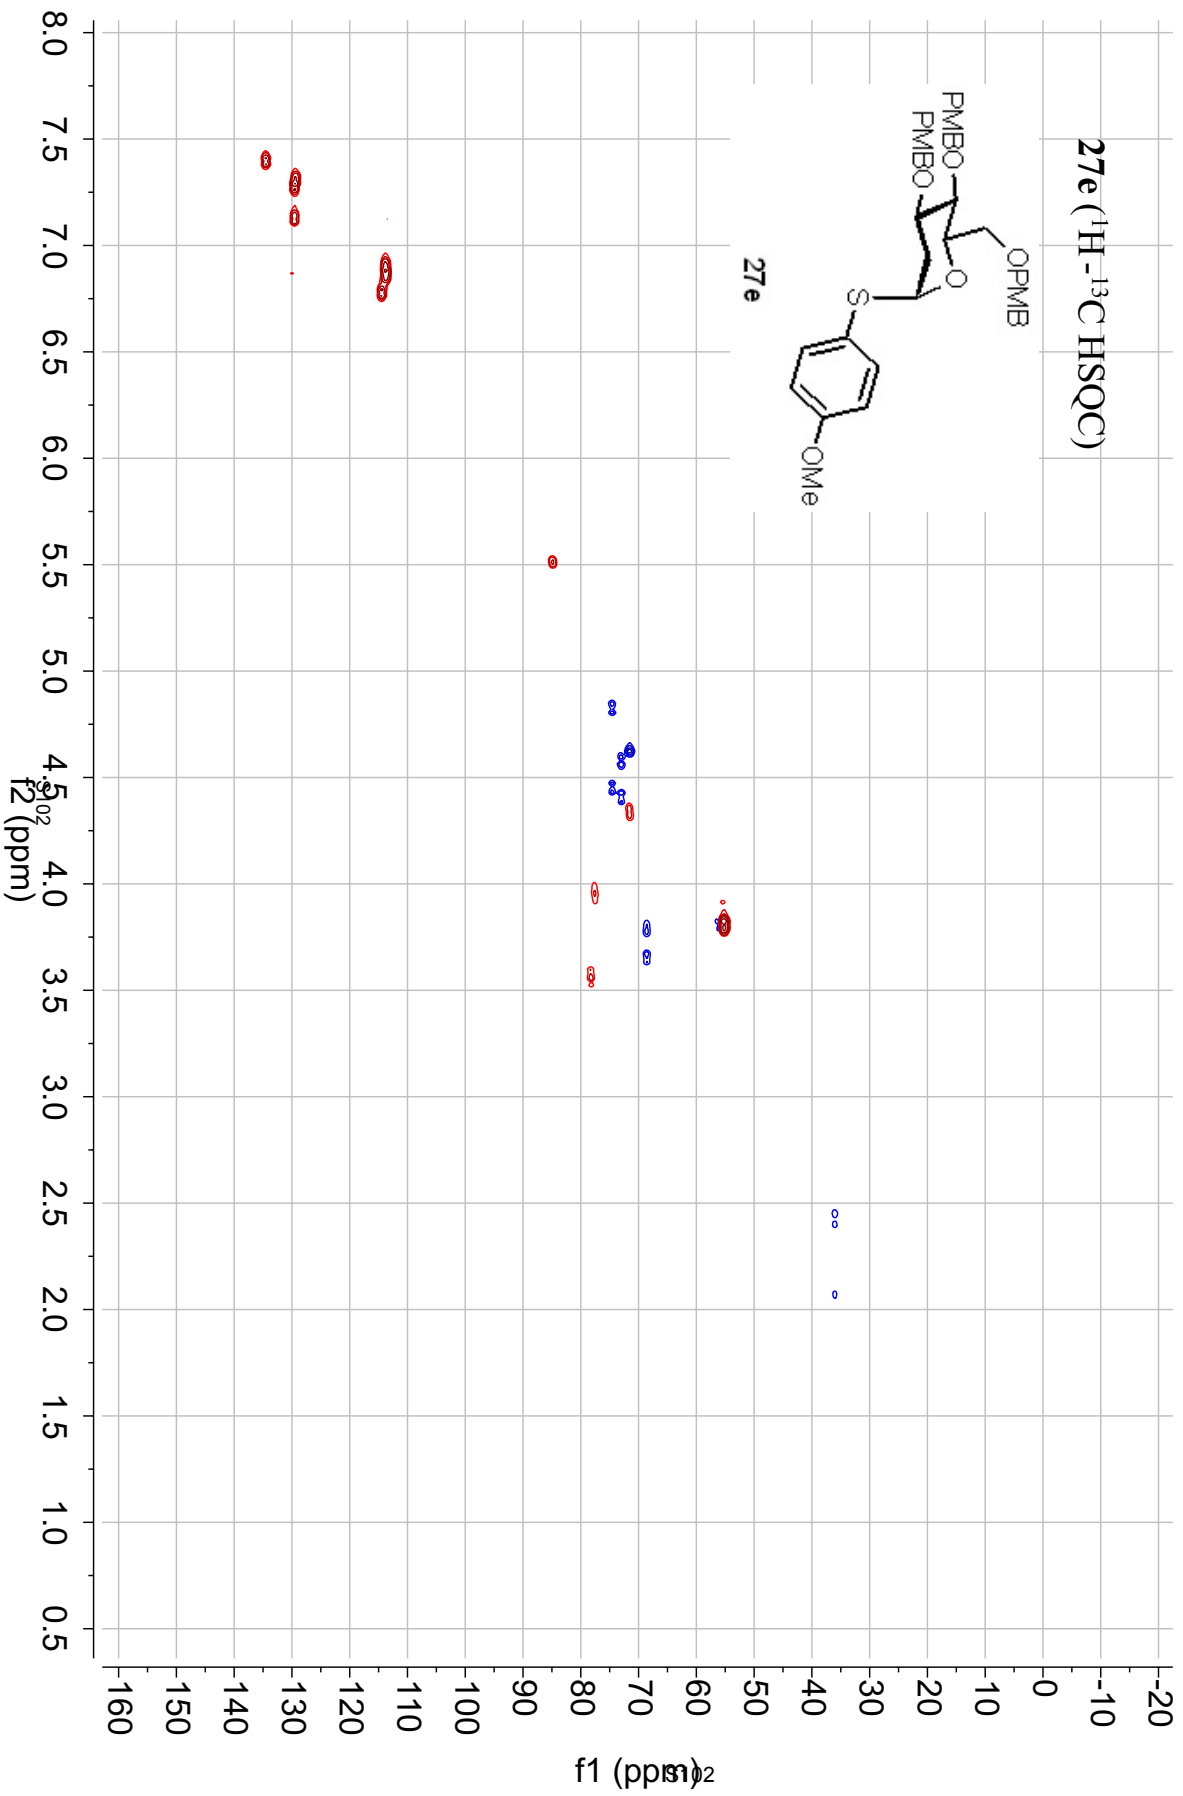

**27f** (<sup>1</sup>H NMR, 300MHz, CDCl<sub>3</sub>)

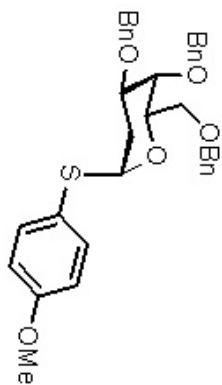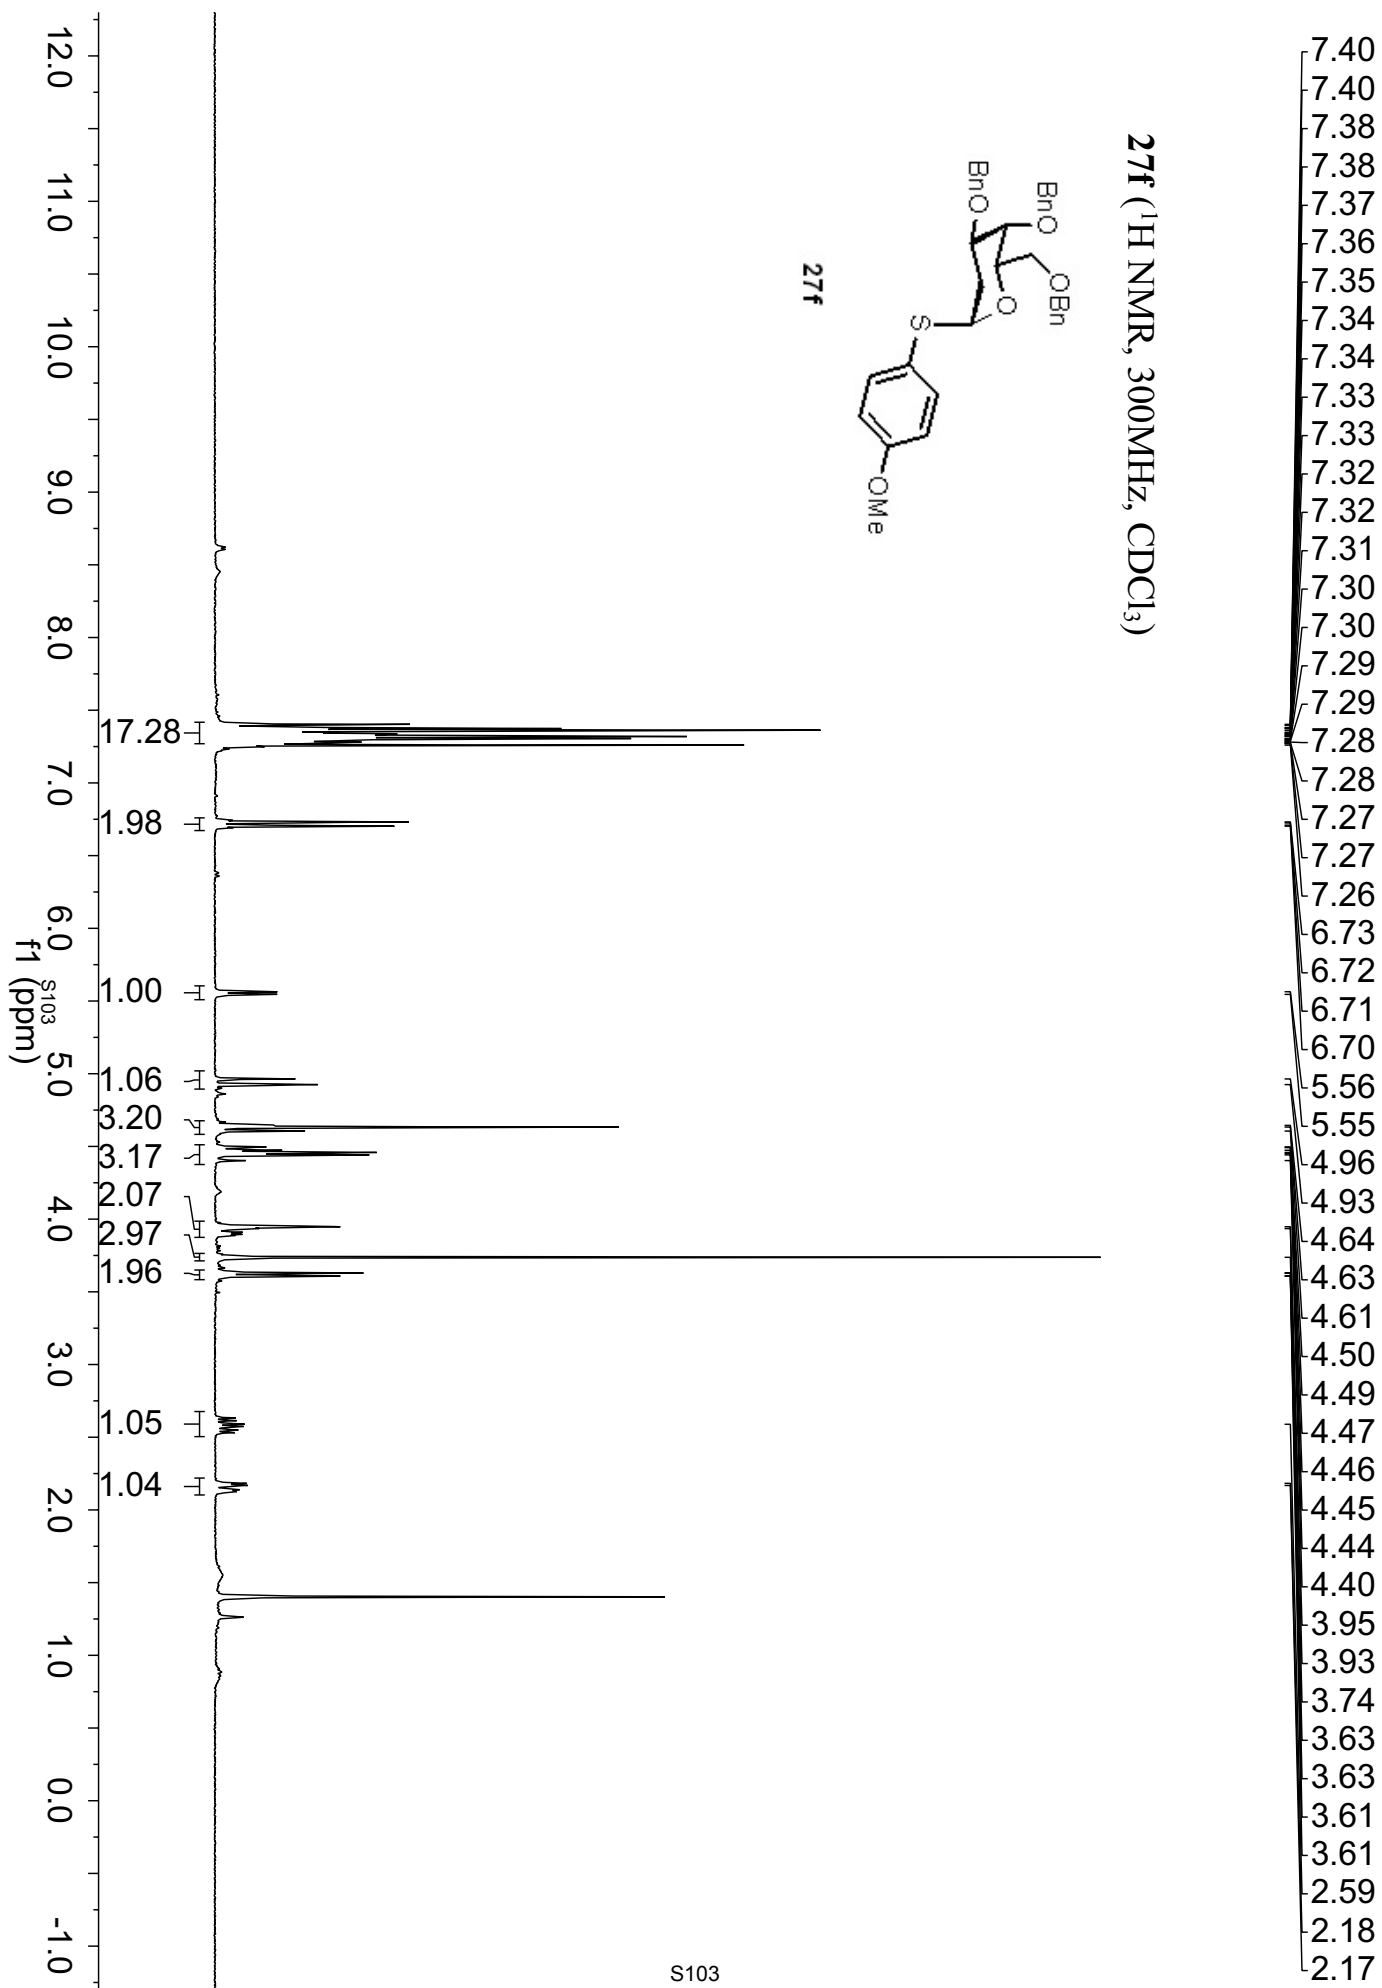

**27f** ( $^{13}\text{C}$  NMR, 75MHz,  $\text{CDCl}_3$ )

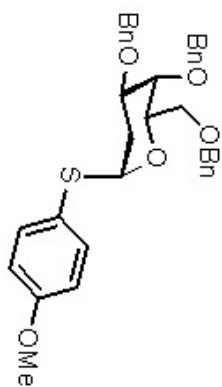

**27f**

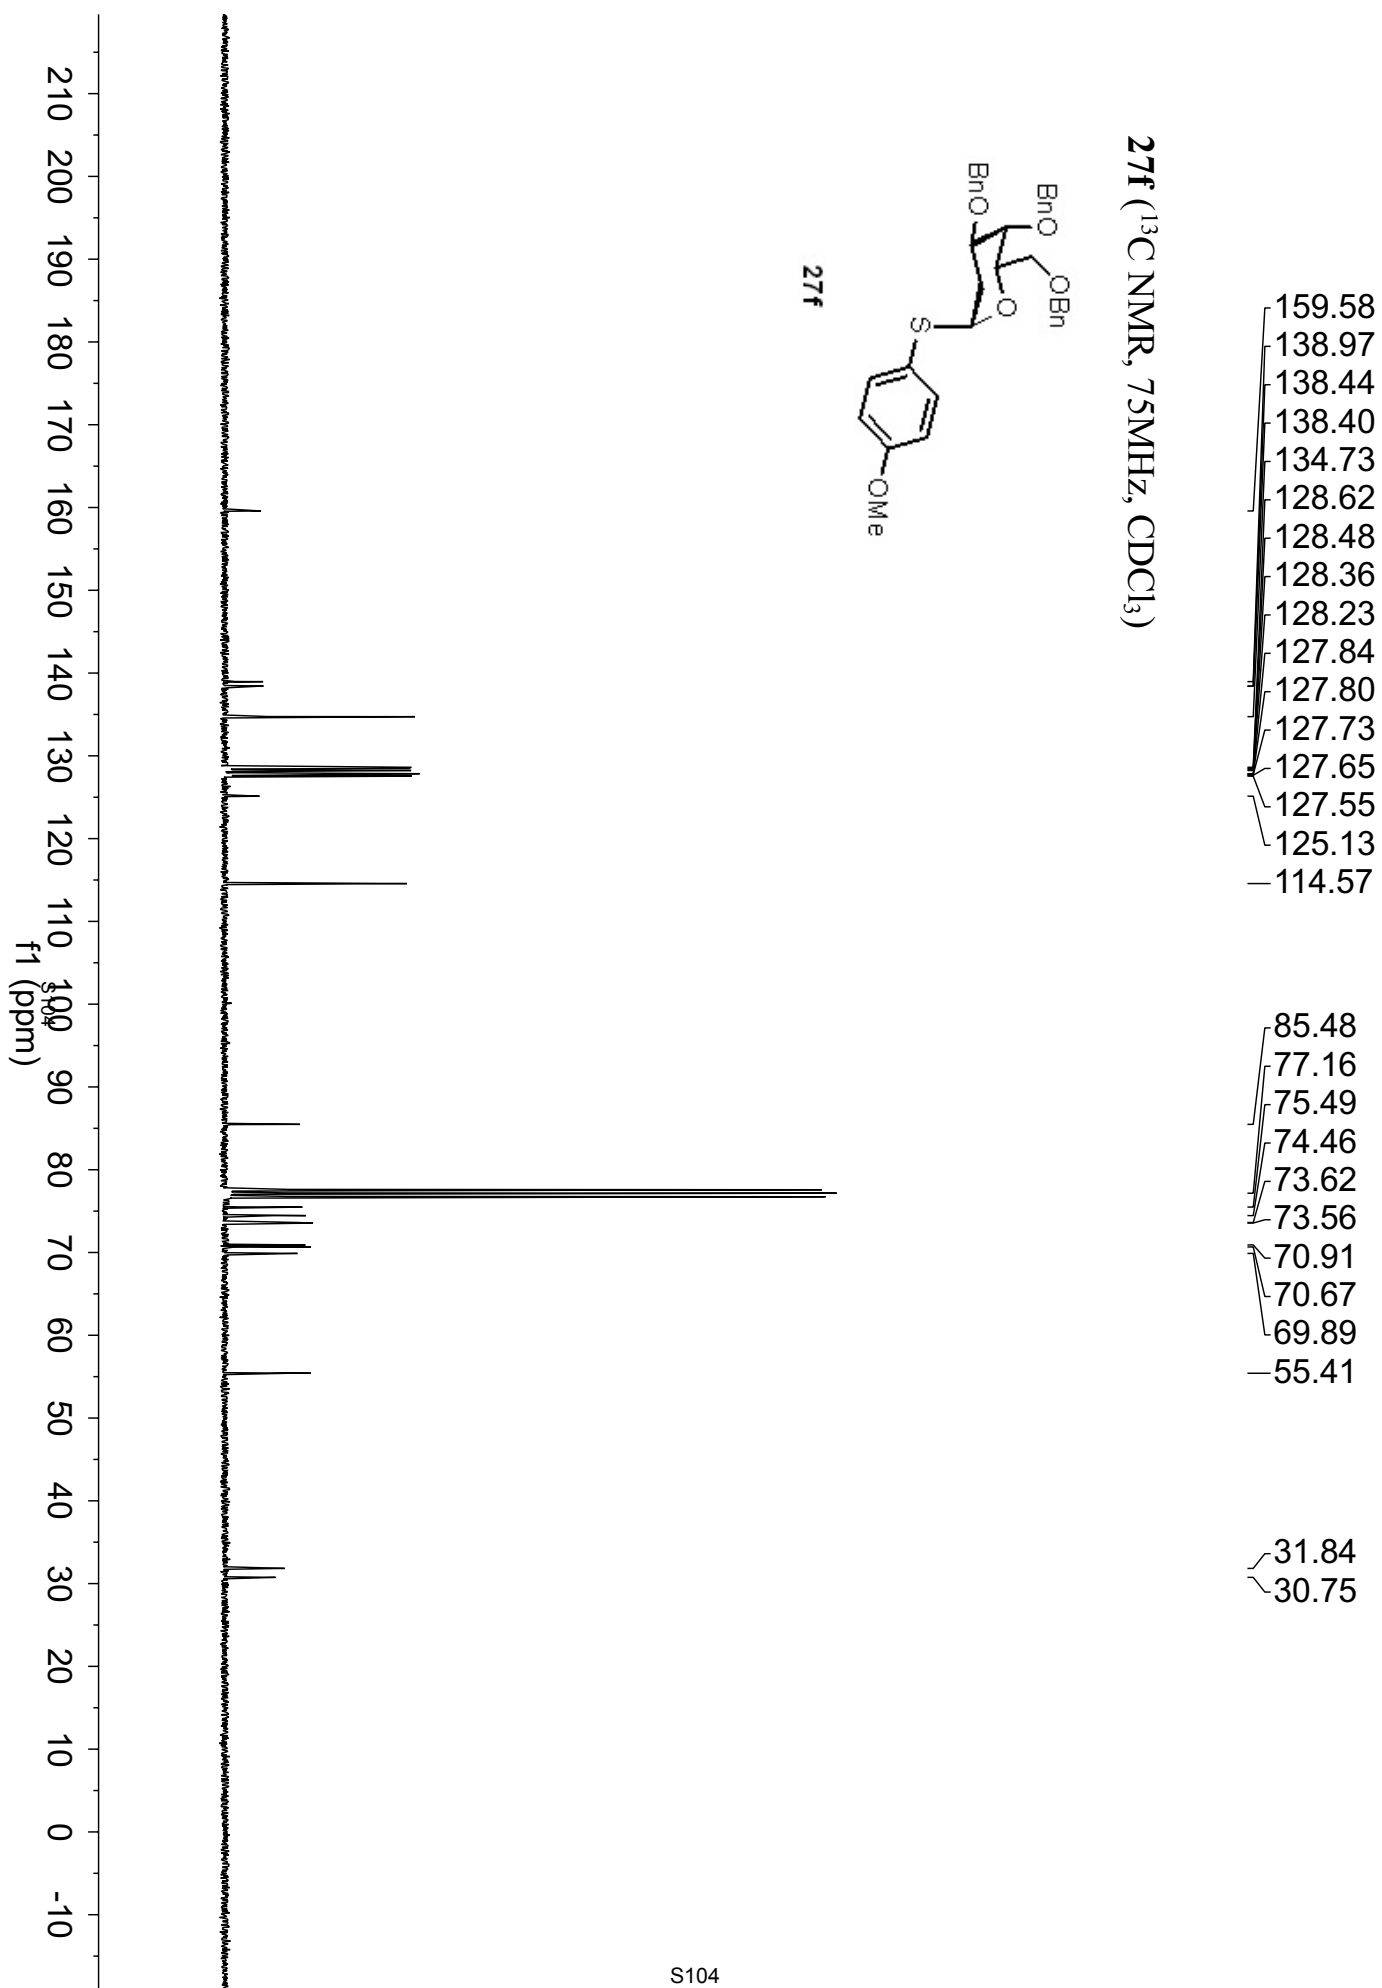





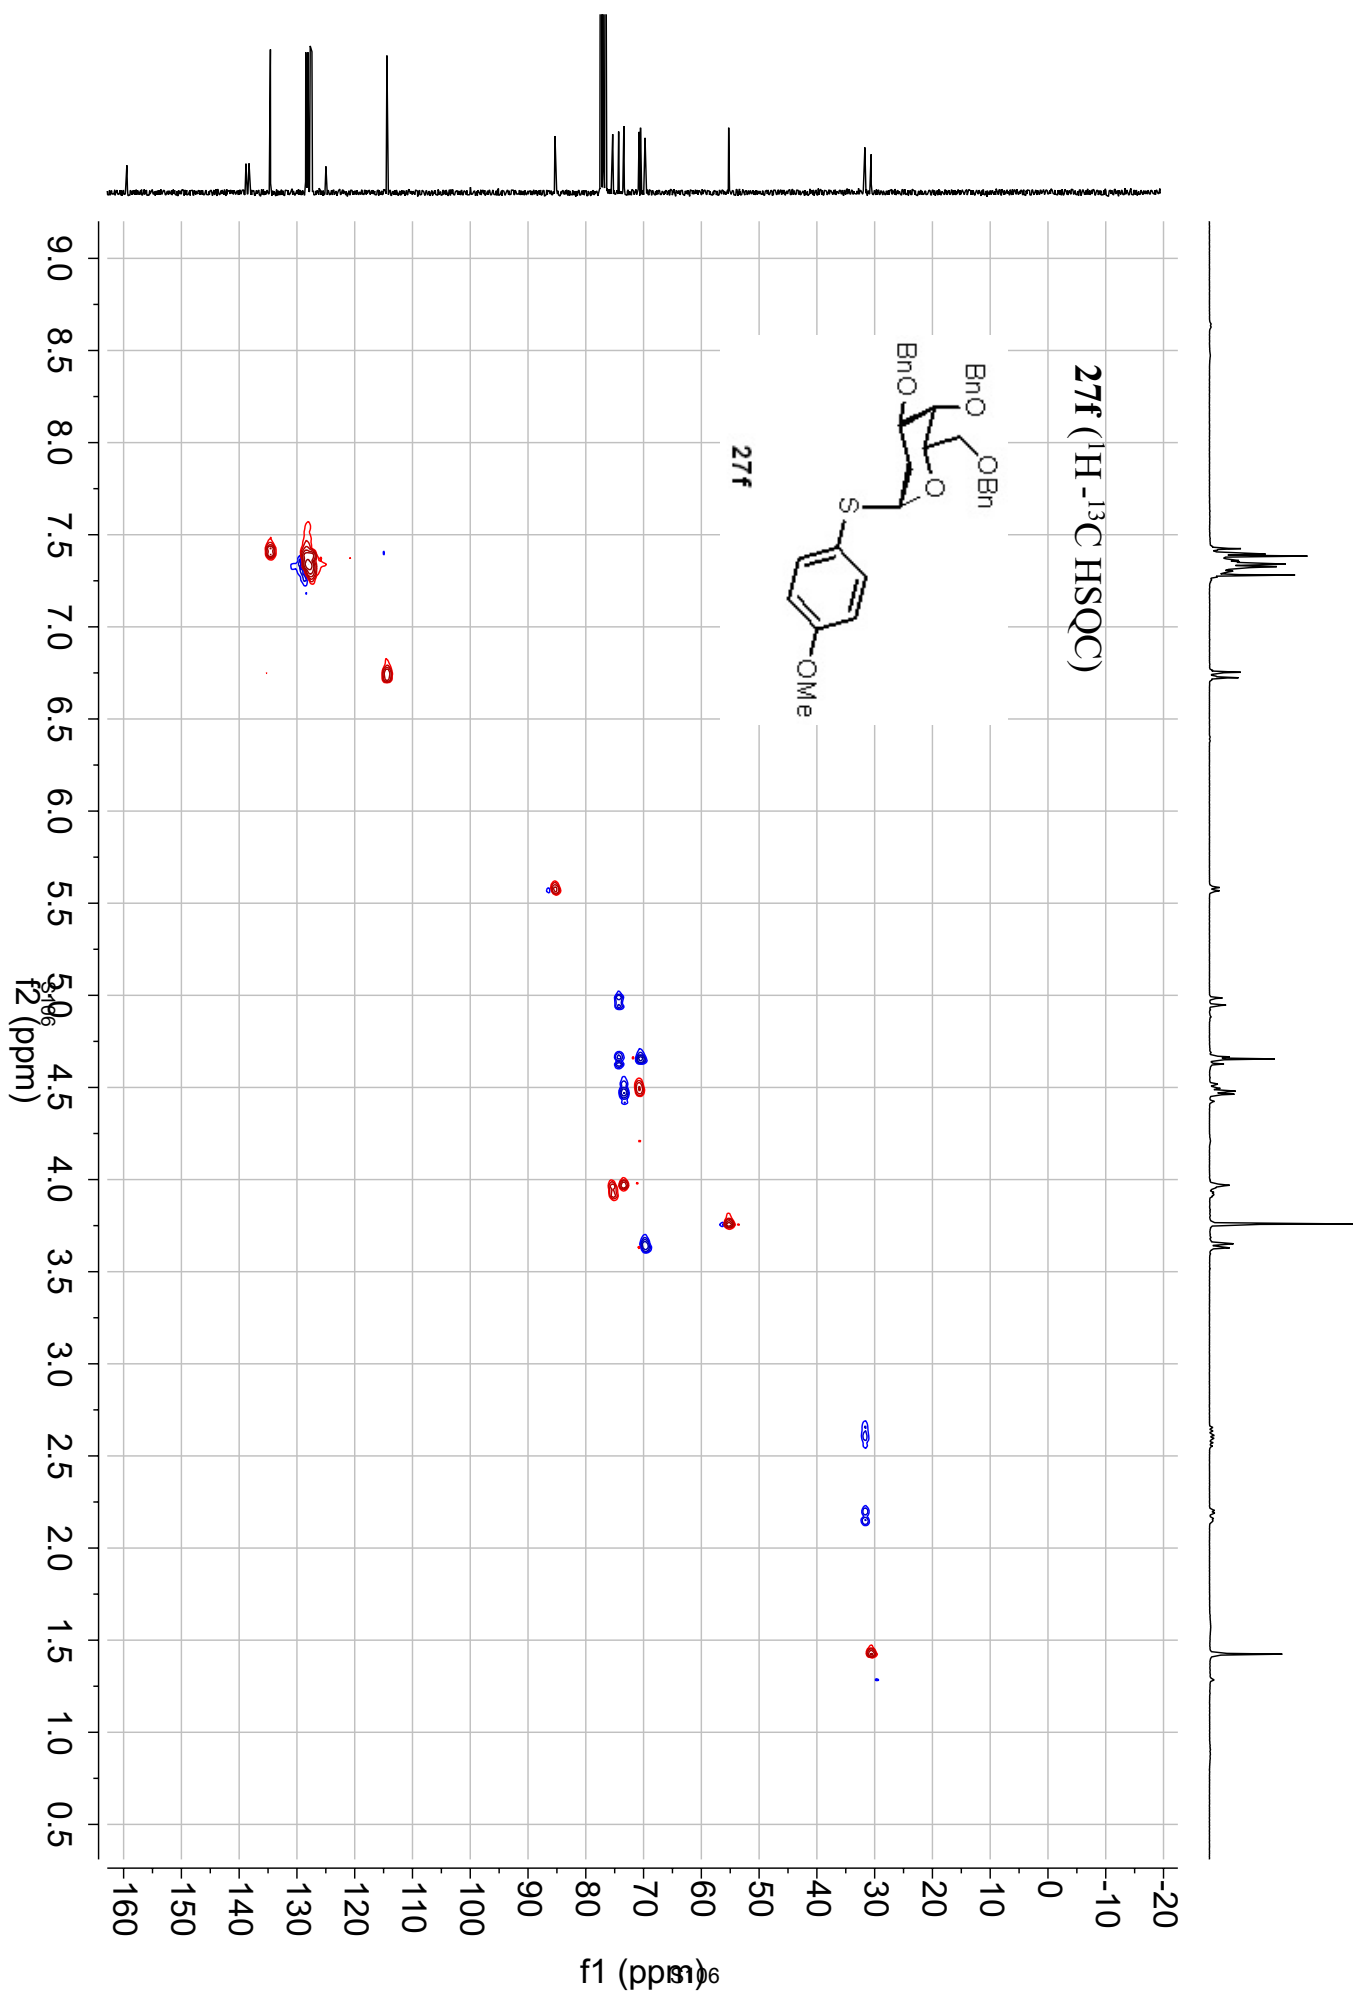

**27g** (<sup>1</sup>H NMR, 300MHz, CDCl<sub>3</sub>)

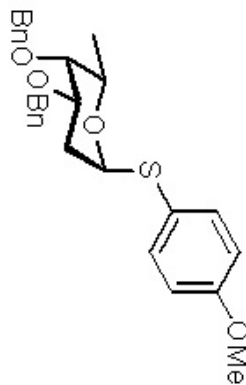

**27g**

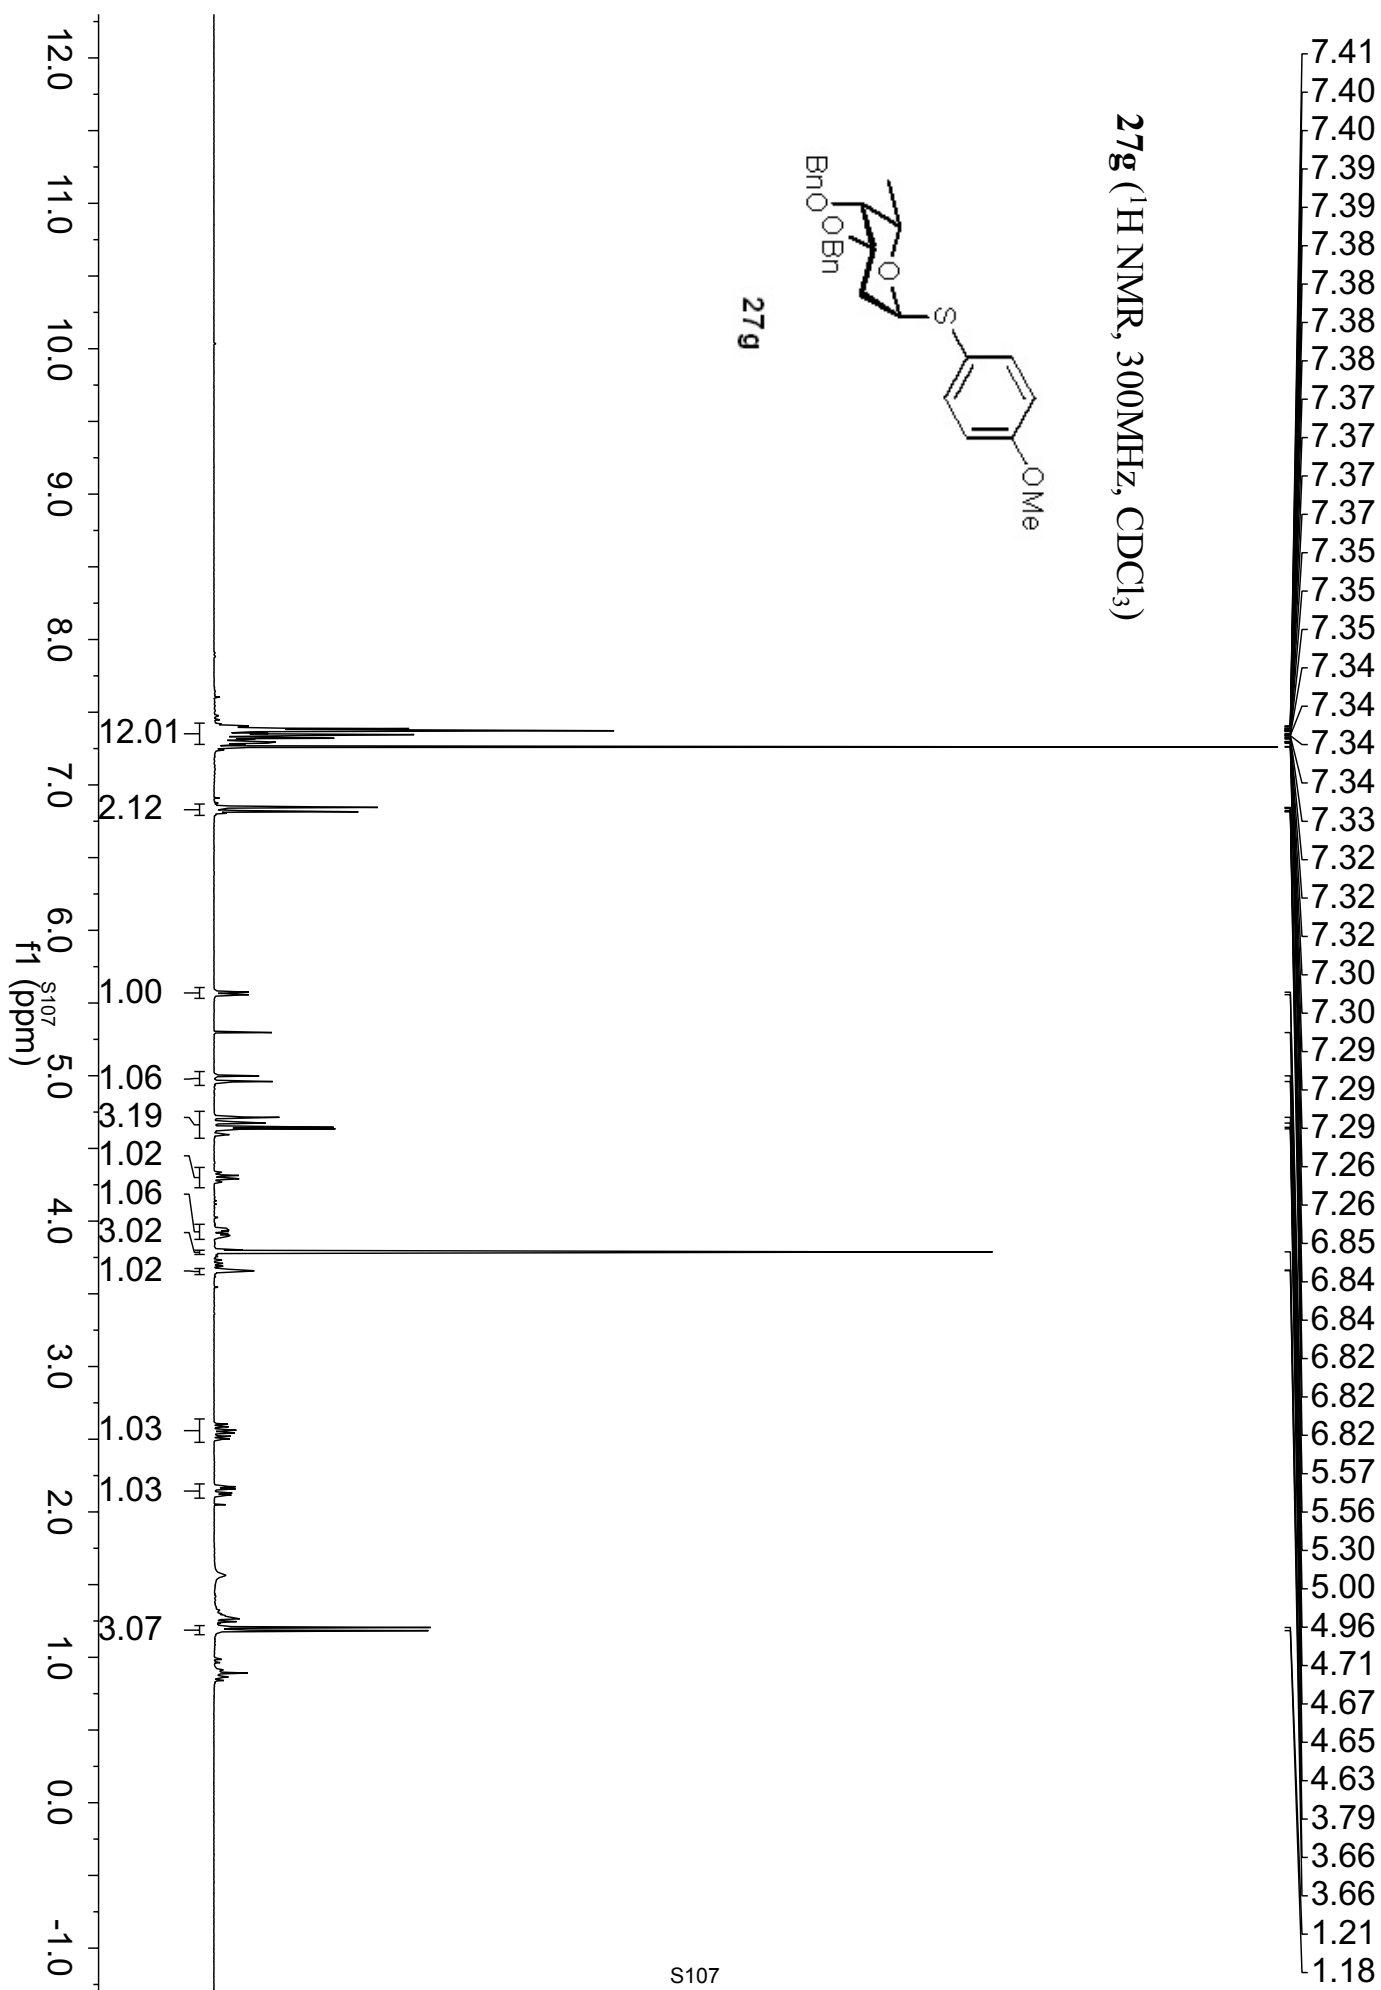

**27g** ( $^{13}\text{C}$  NMR, 75MHz,  $\text{CDCl}_3$ )

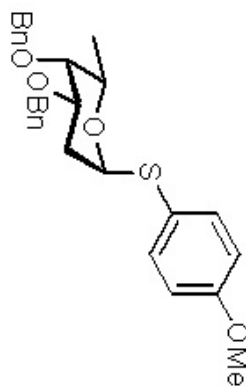

**27g**

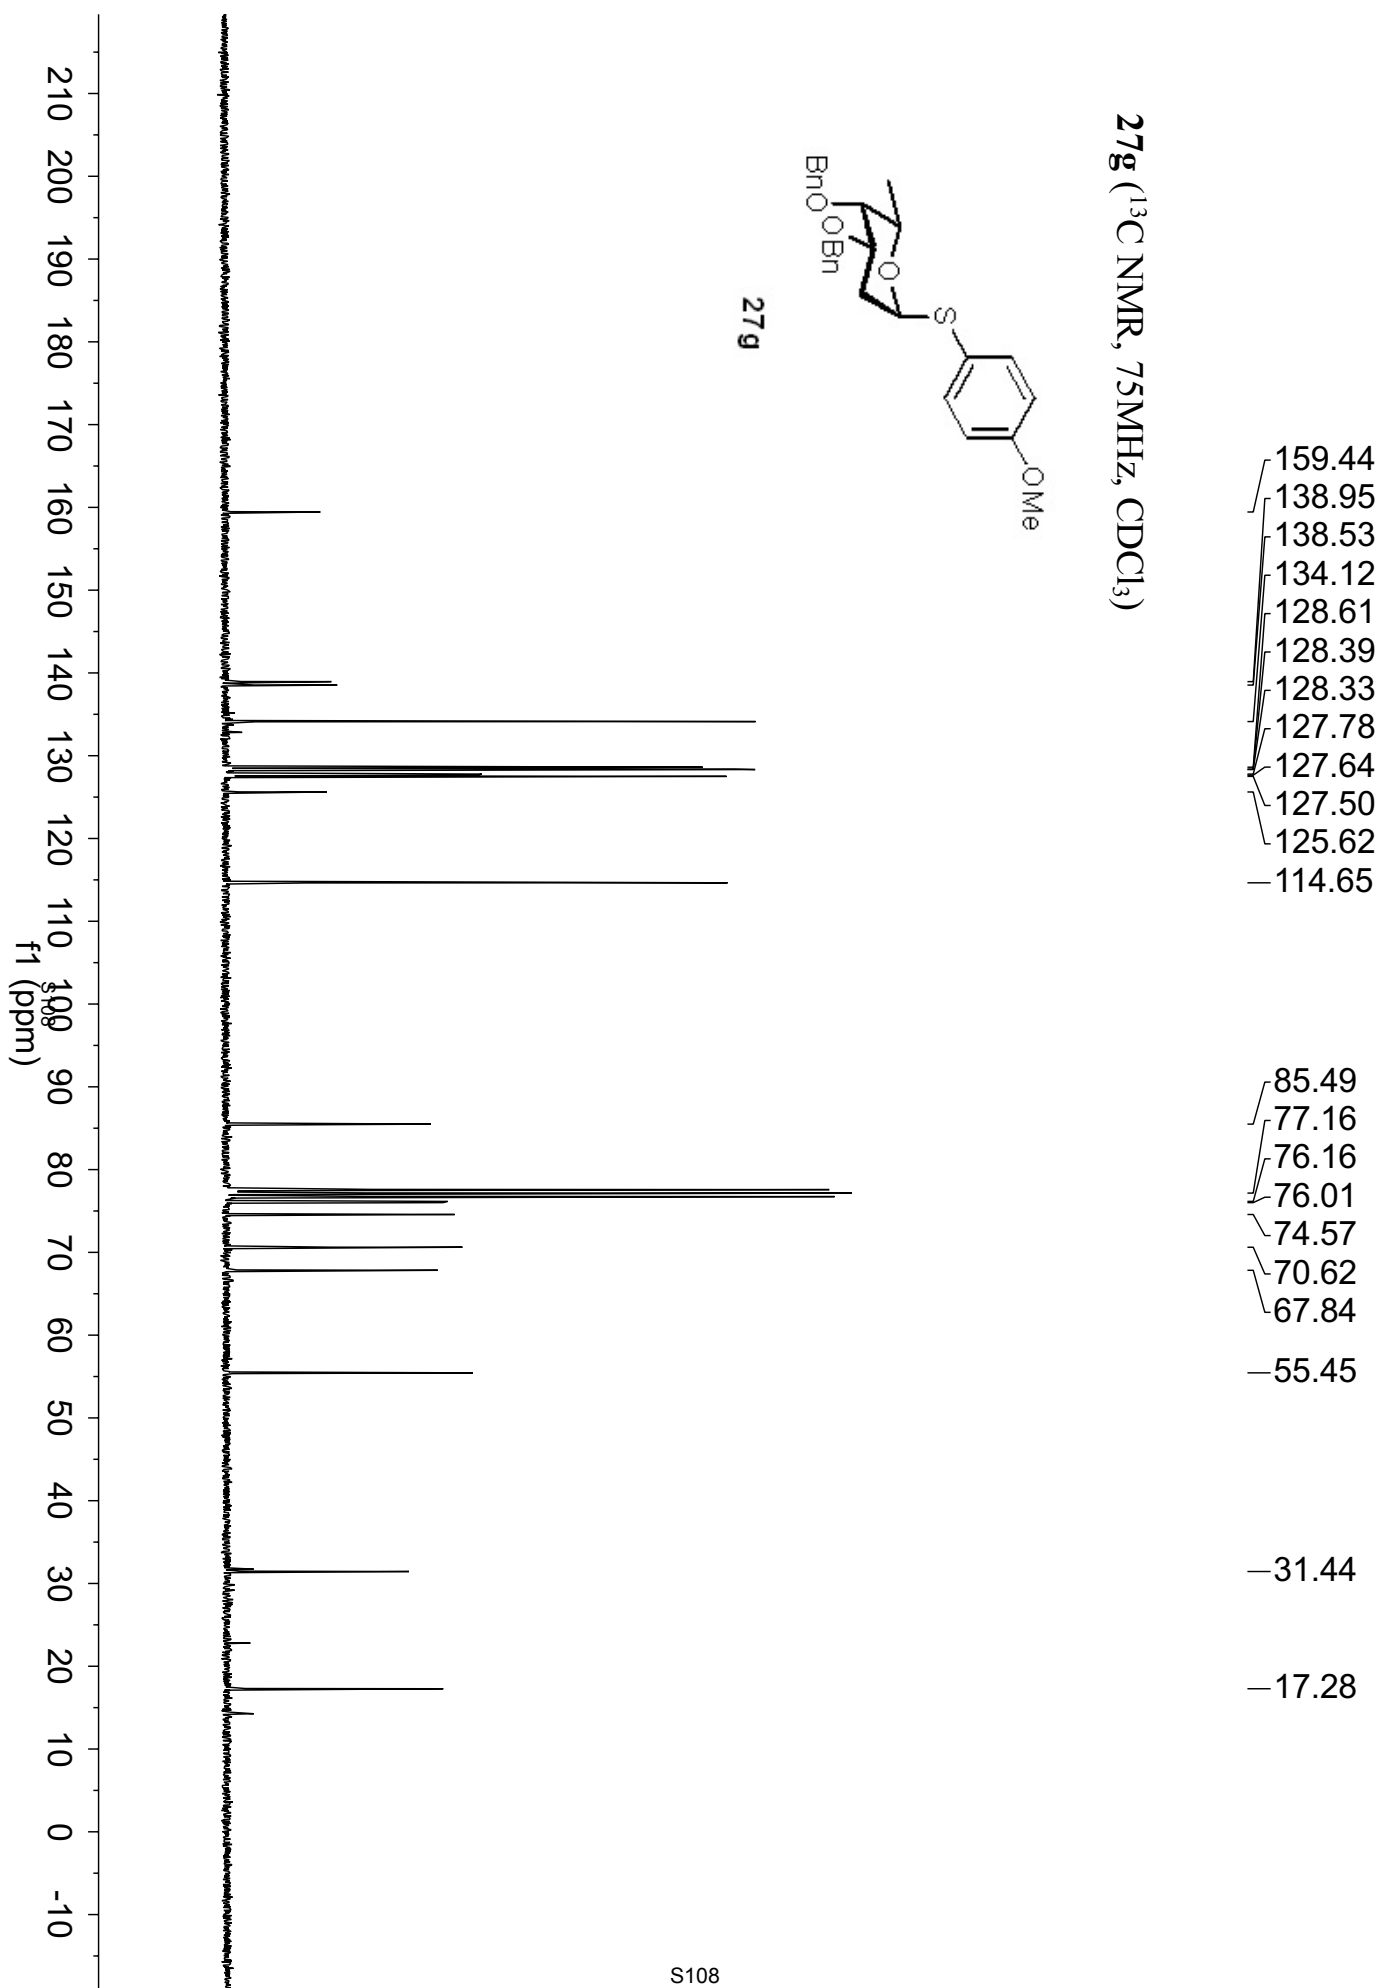

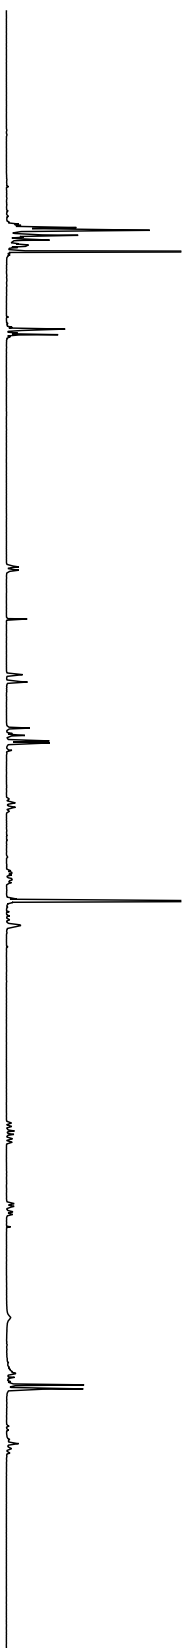

**27g** ( $^1\text{H}$ - $^{13}\text{C}$  Coupled HSQC)

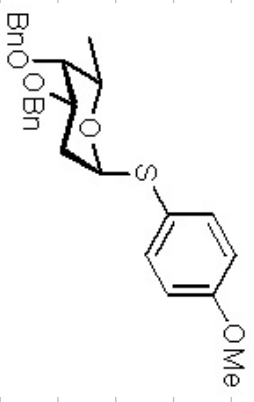

27g

$J = 168 \text{ Hz}$

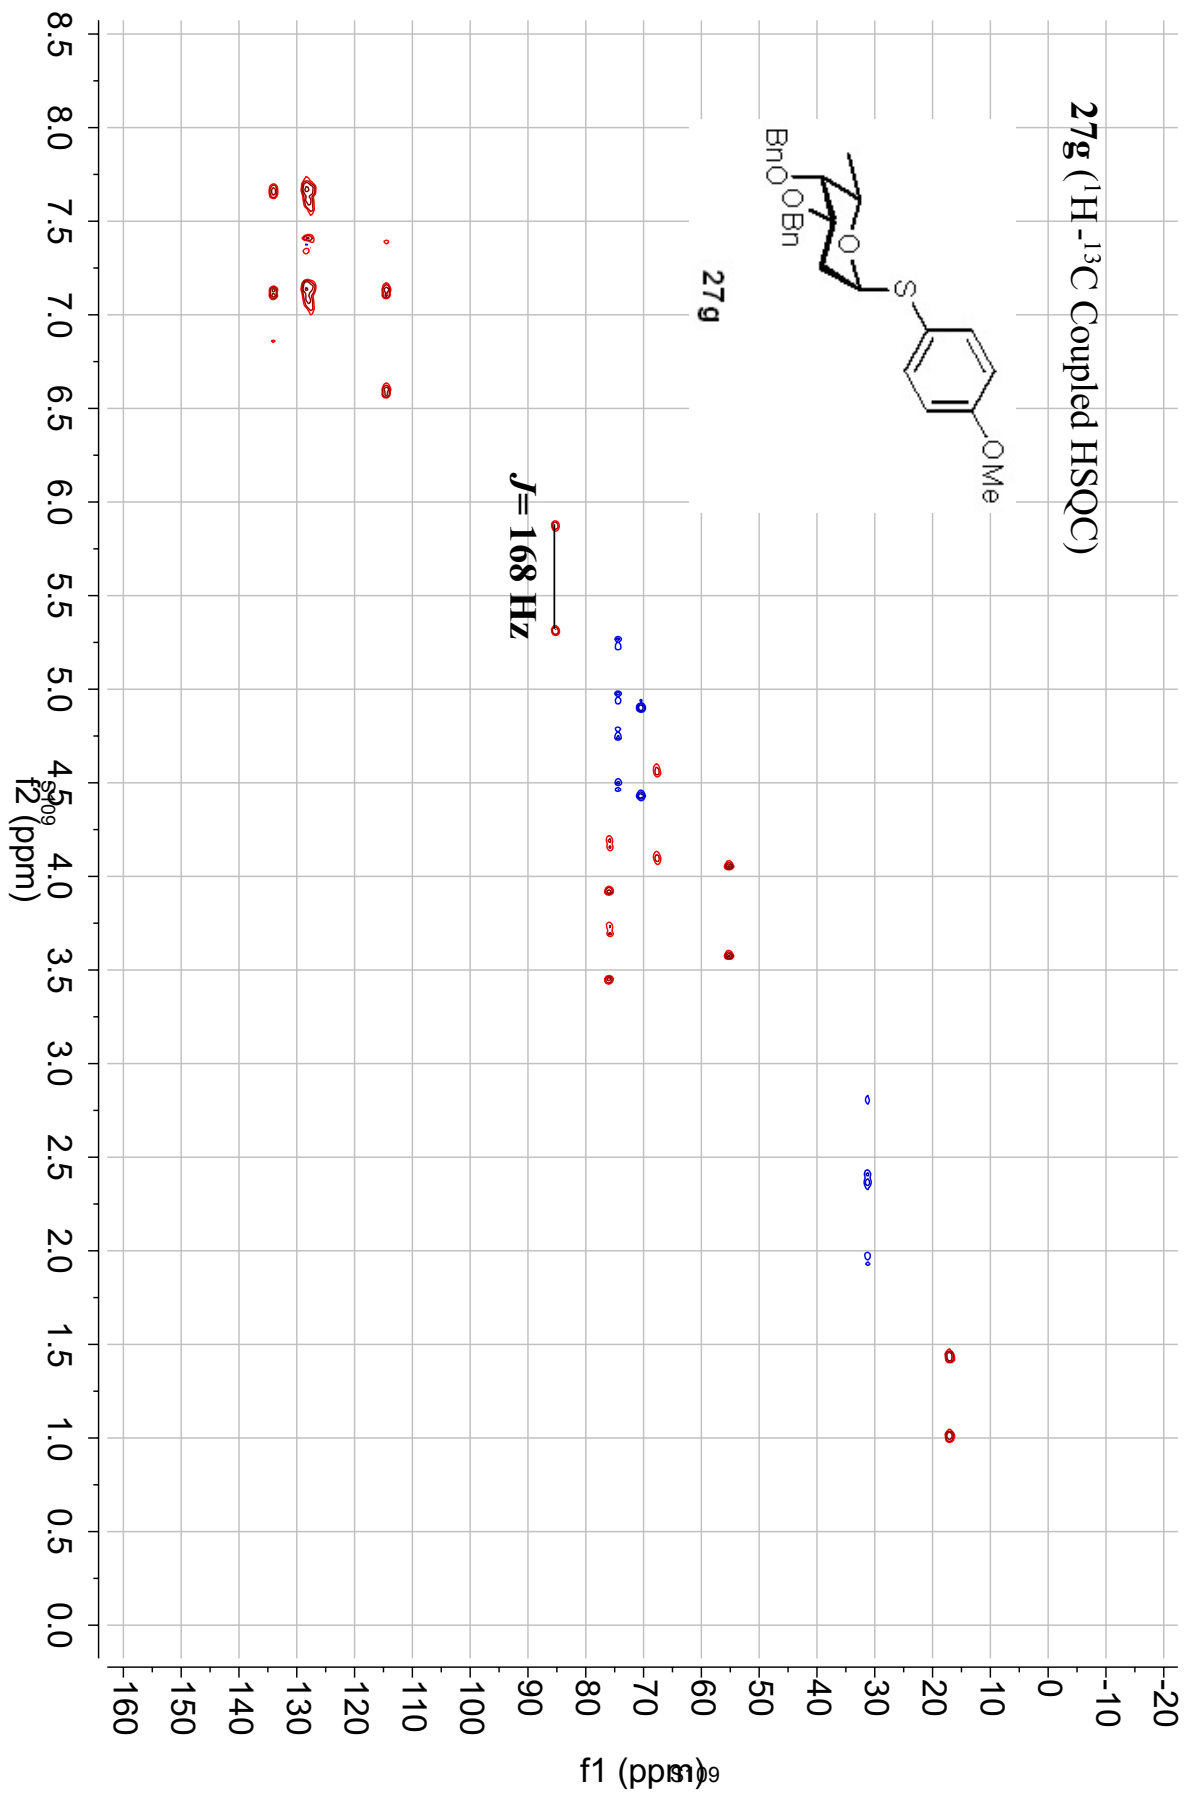



**27g** ( $^1\text{H}$ - $^{13}\text{C}$  HSQC)

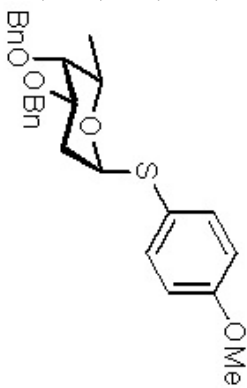

**27g**

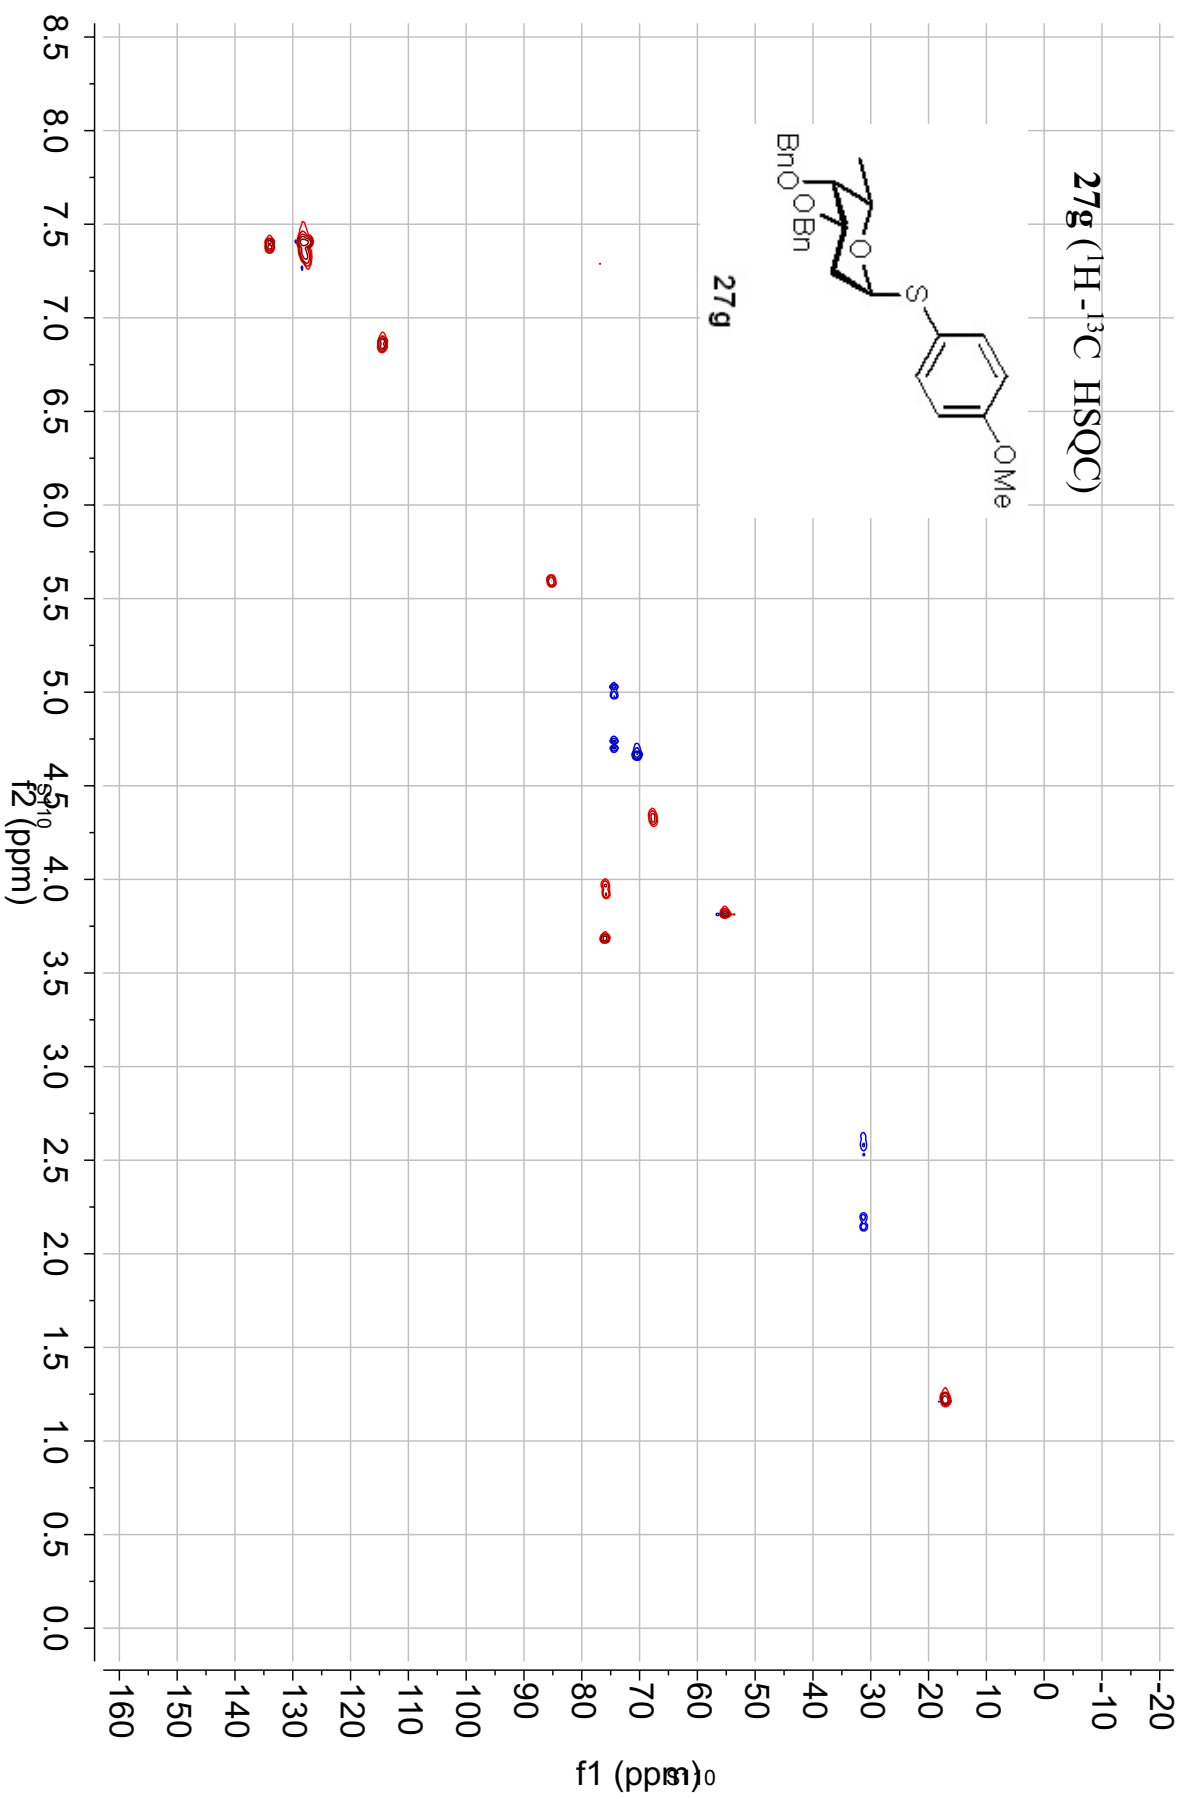

27h (<sup>1</sup>H NMR, 300MHz, CDCl<sub>3</sub>)

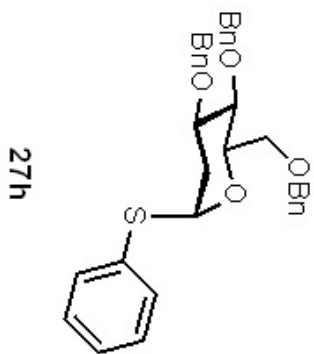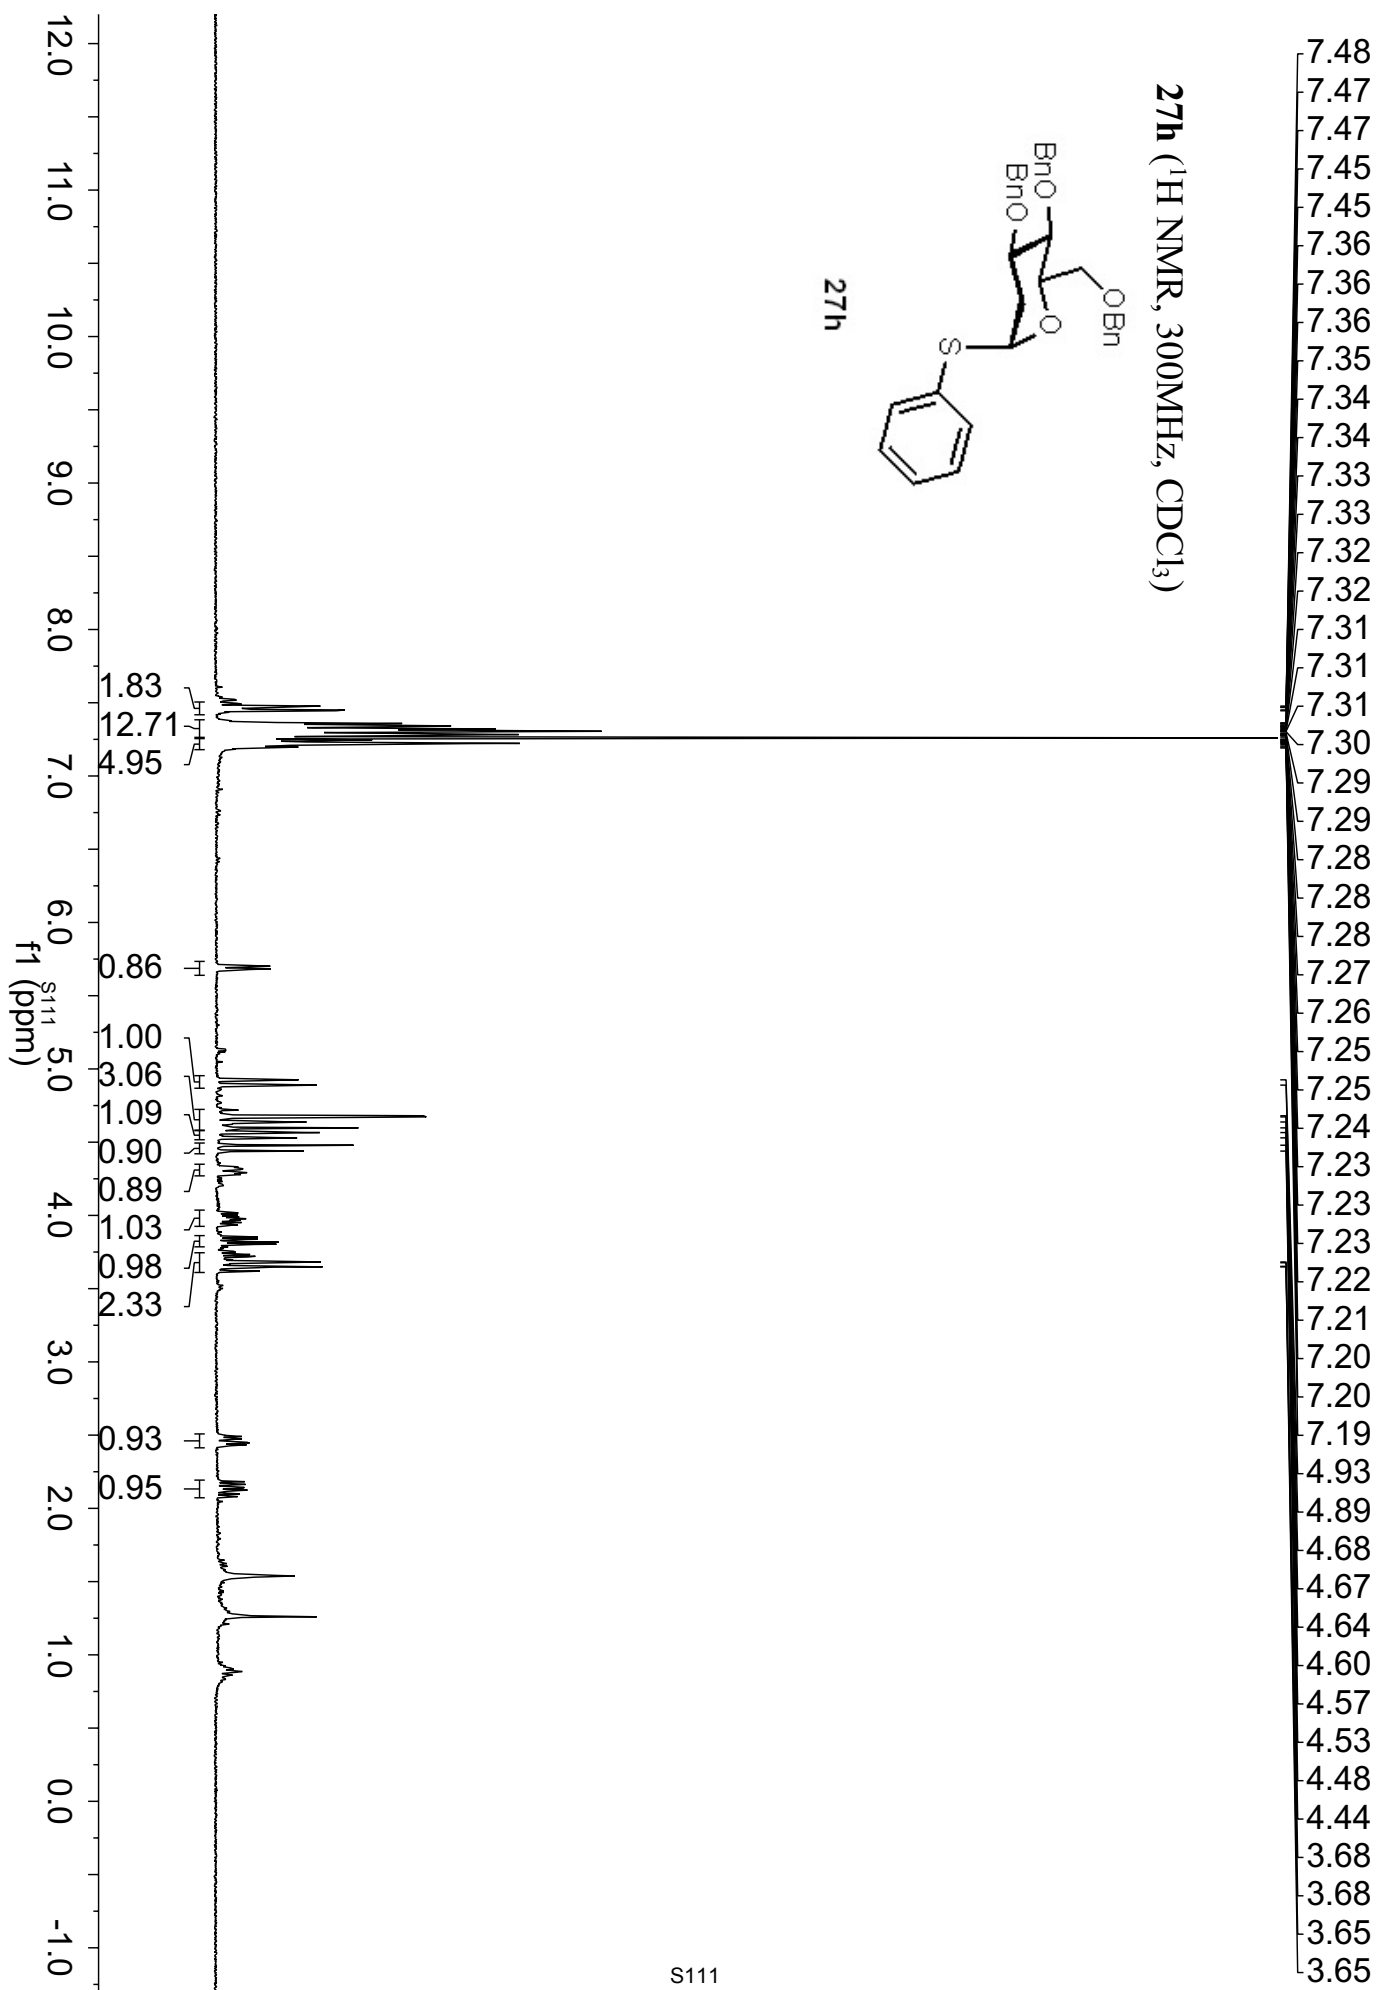

**27h** ( $^{13}\text{C}$  NMR, 75MHz,  $\text{CDCl}_3$ )

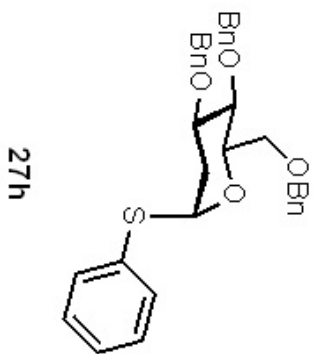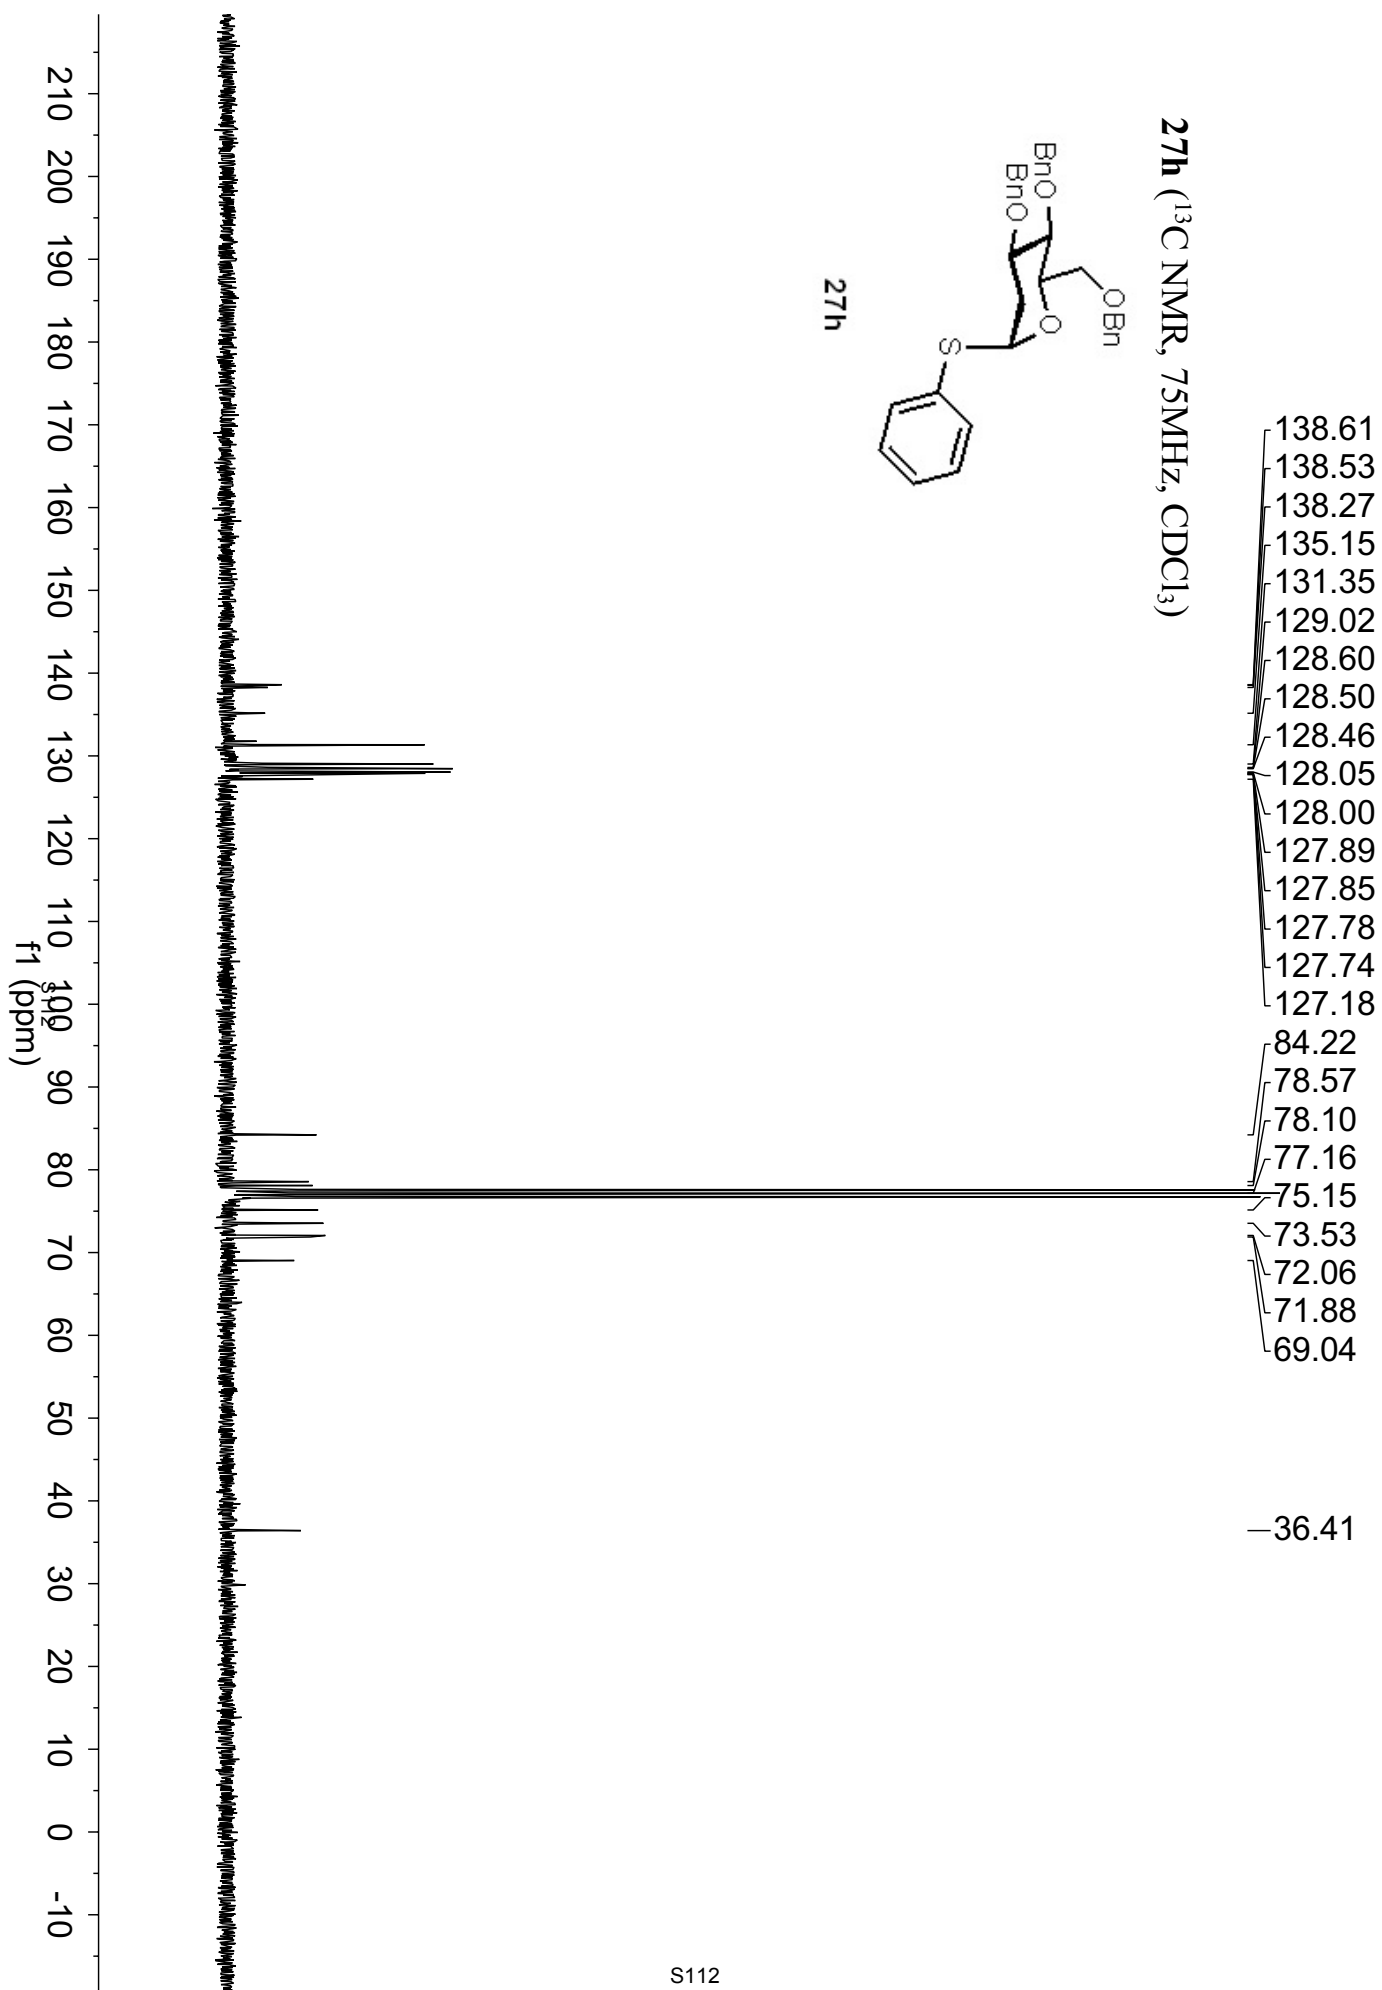



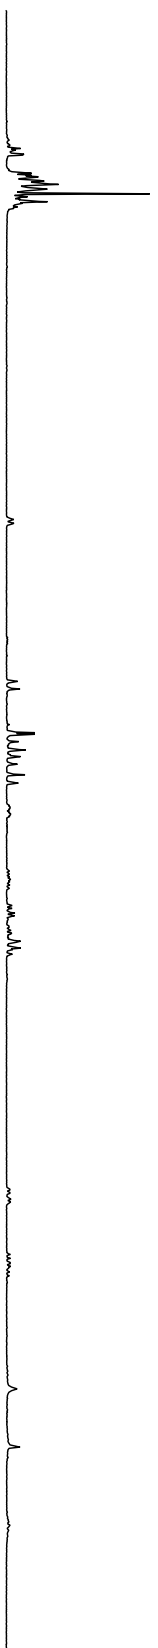

**27h** ( $^1\text{H}$ - $^{13}\text{C}$  Coupled HSQC)

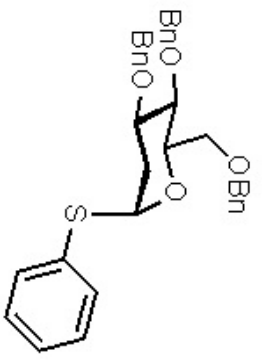

27h

$J = 168 \text{ Hz}$

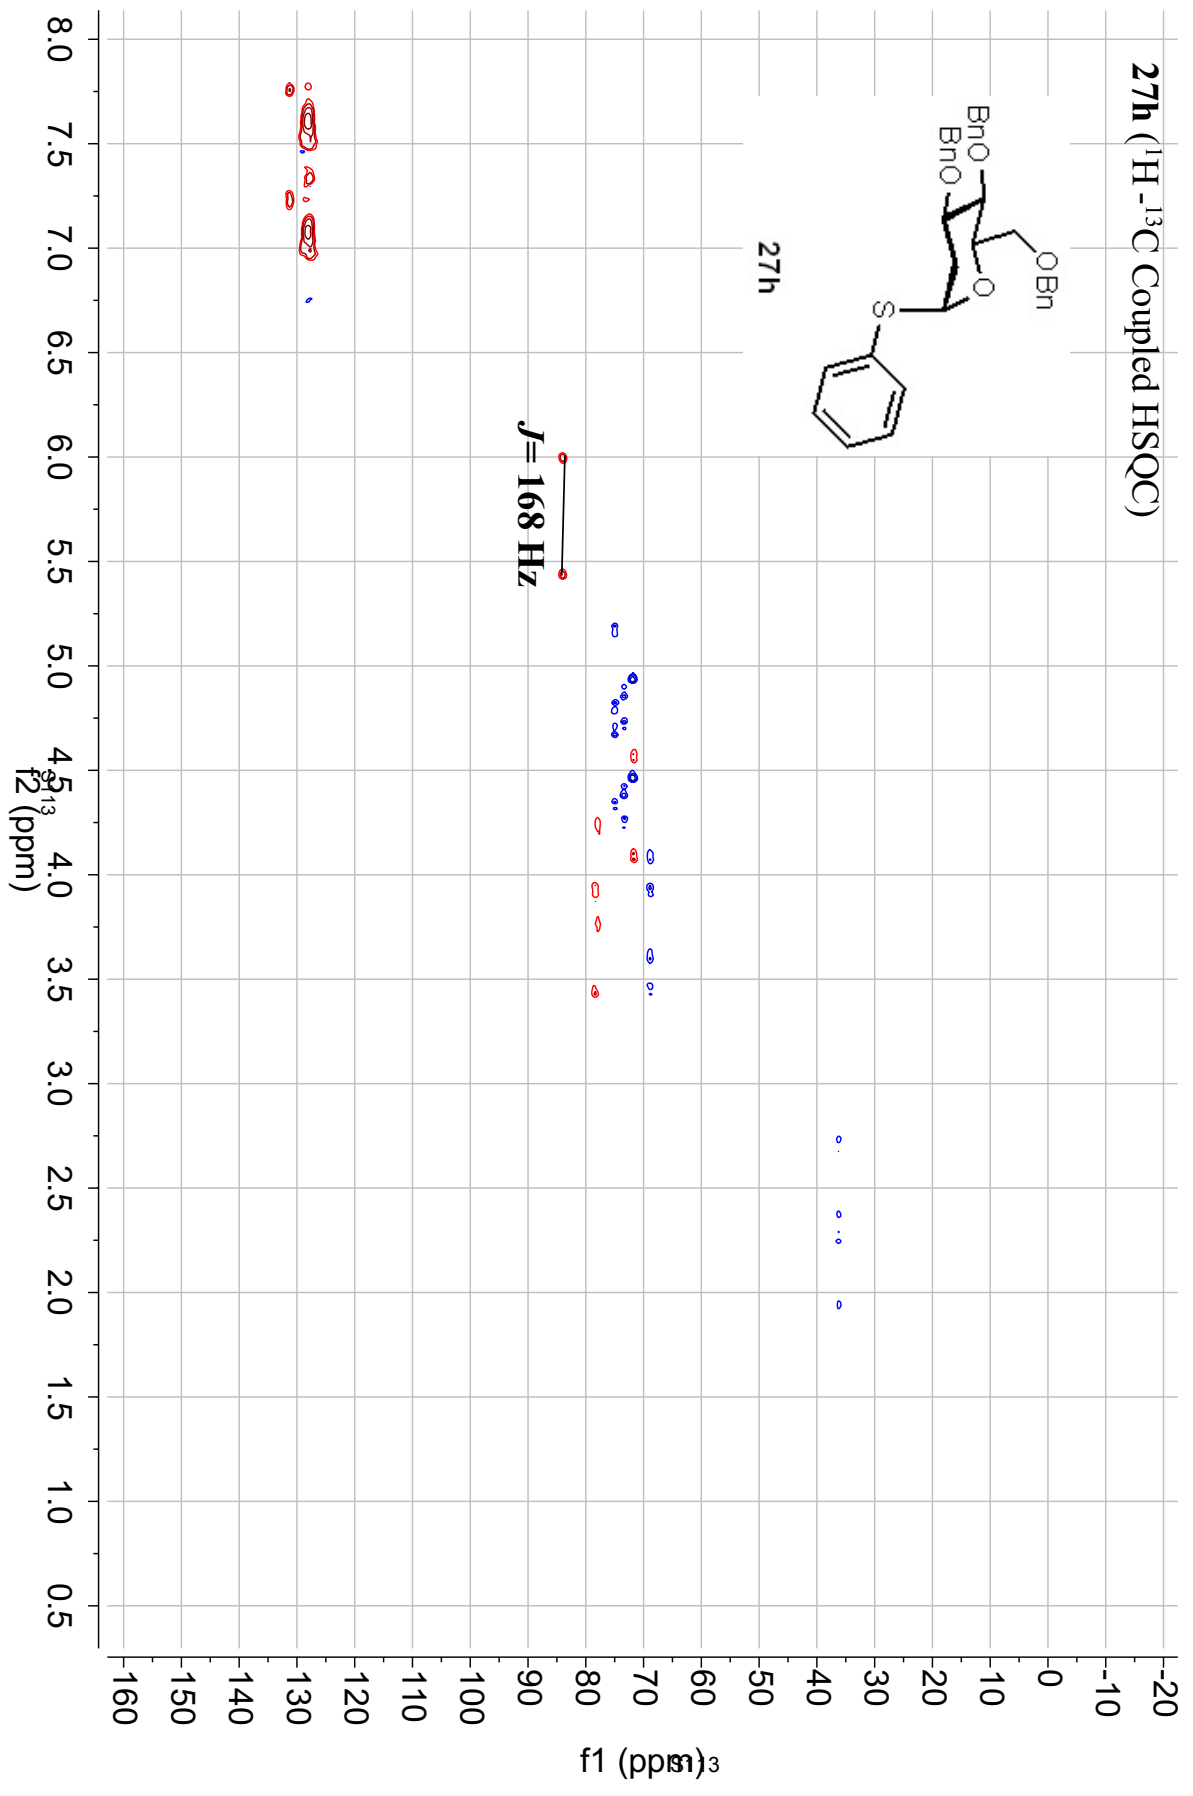

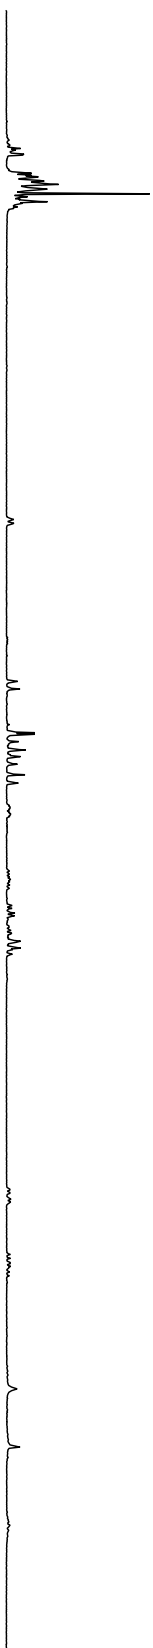

27h ( $^1\text{H}$ - $^{13}\text{C}$  HSQC)

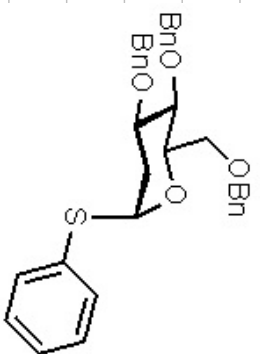

27h

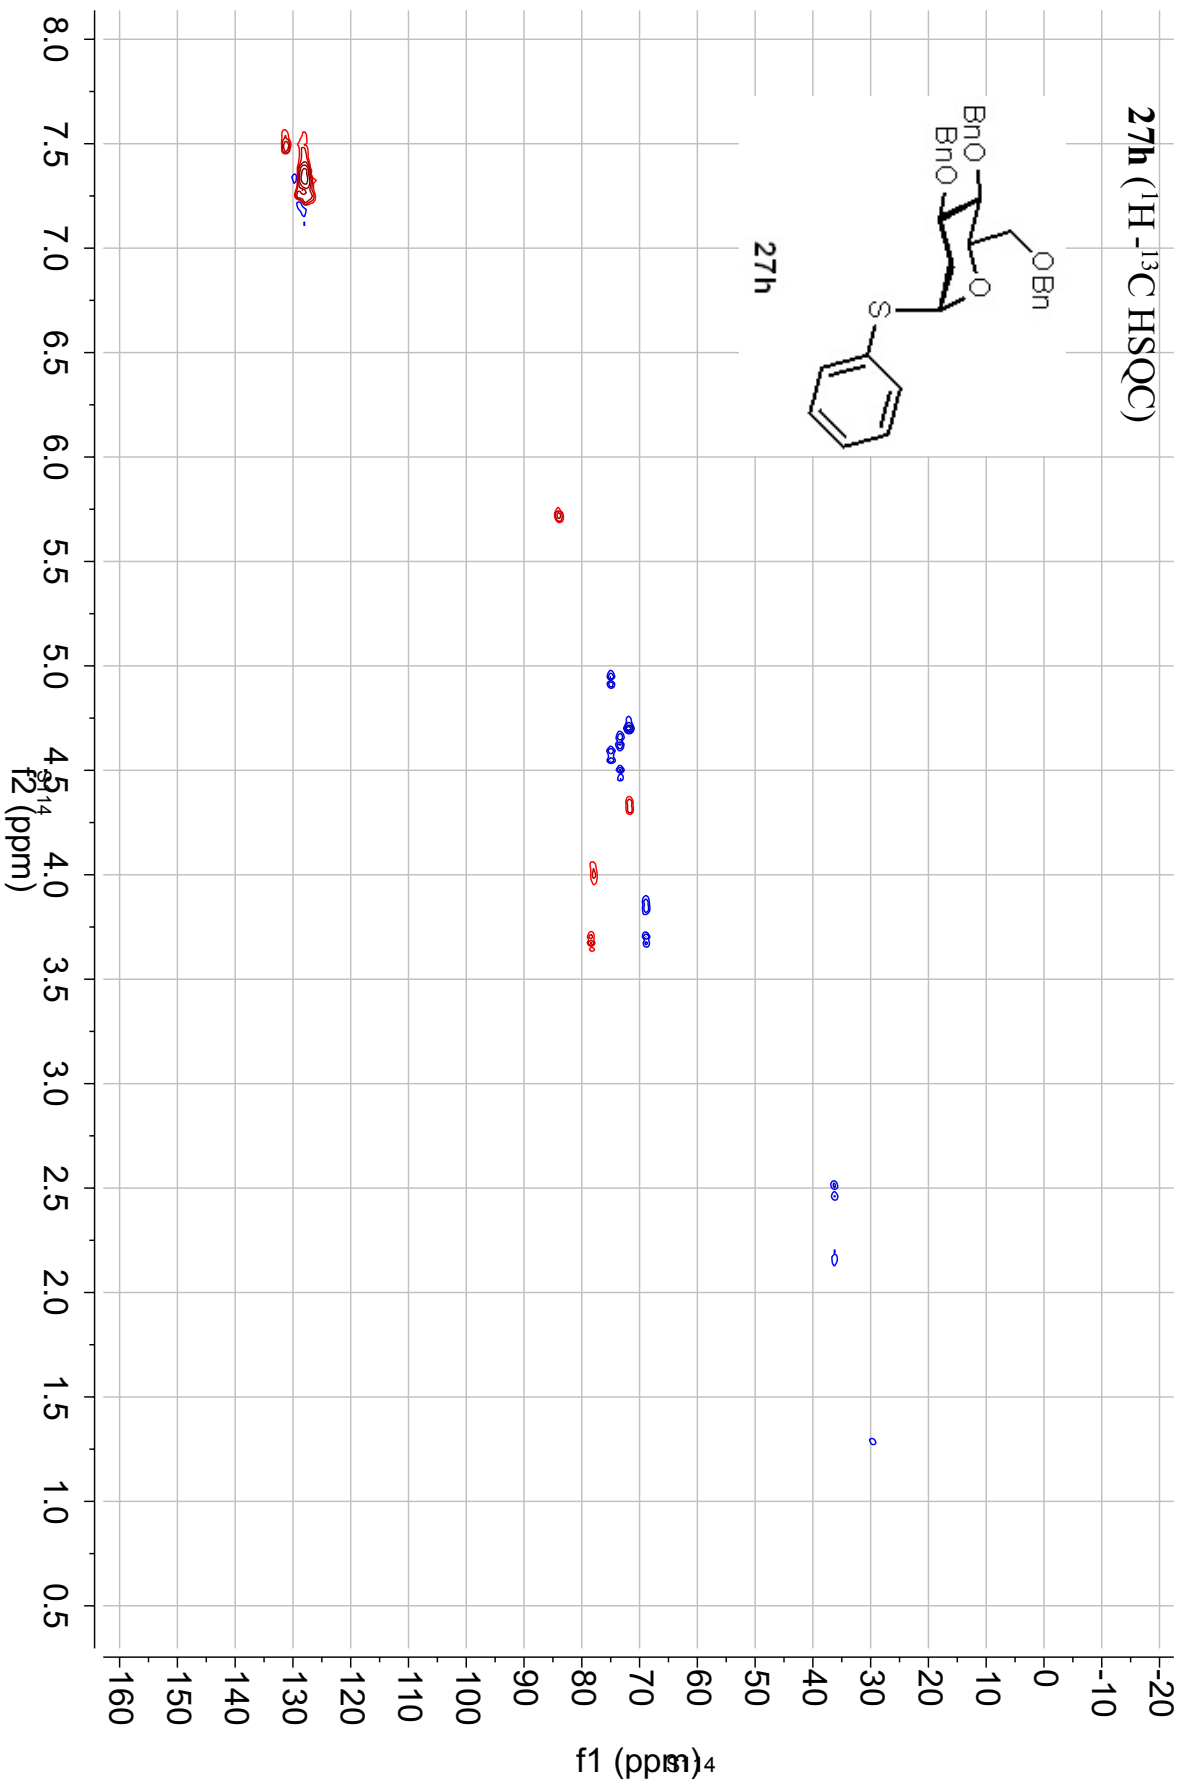

27i (<sup>1</sup>H NMR, 300MHz, CDCl<sub>3</sub>)

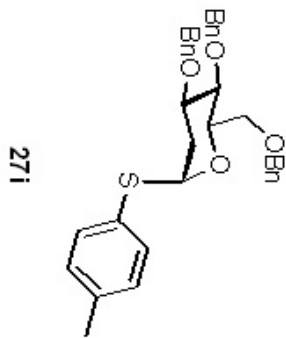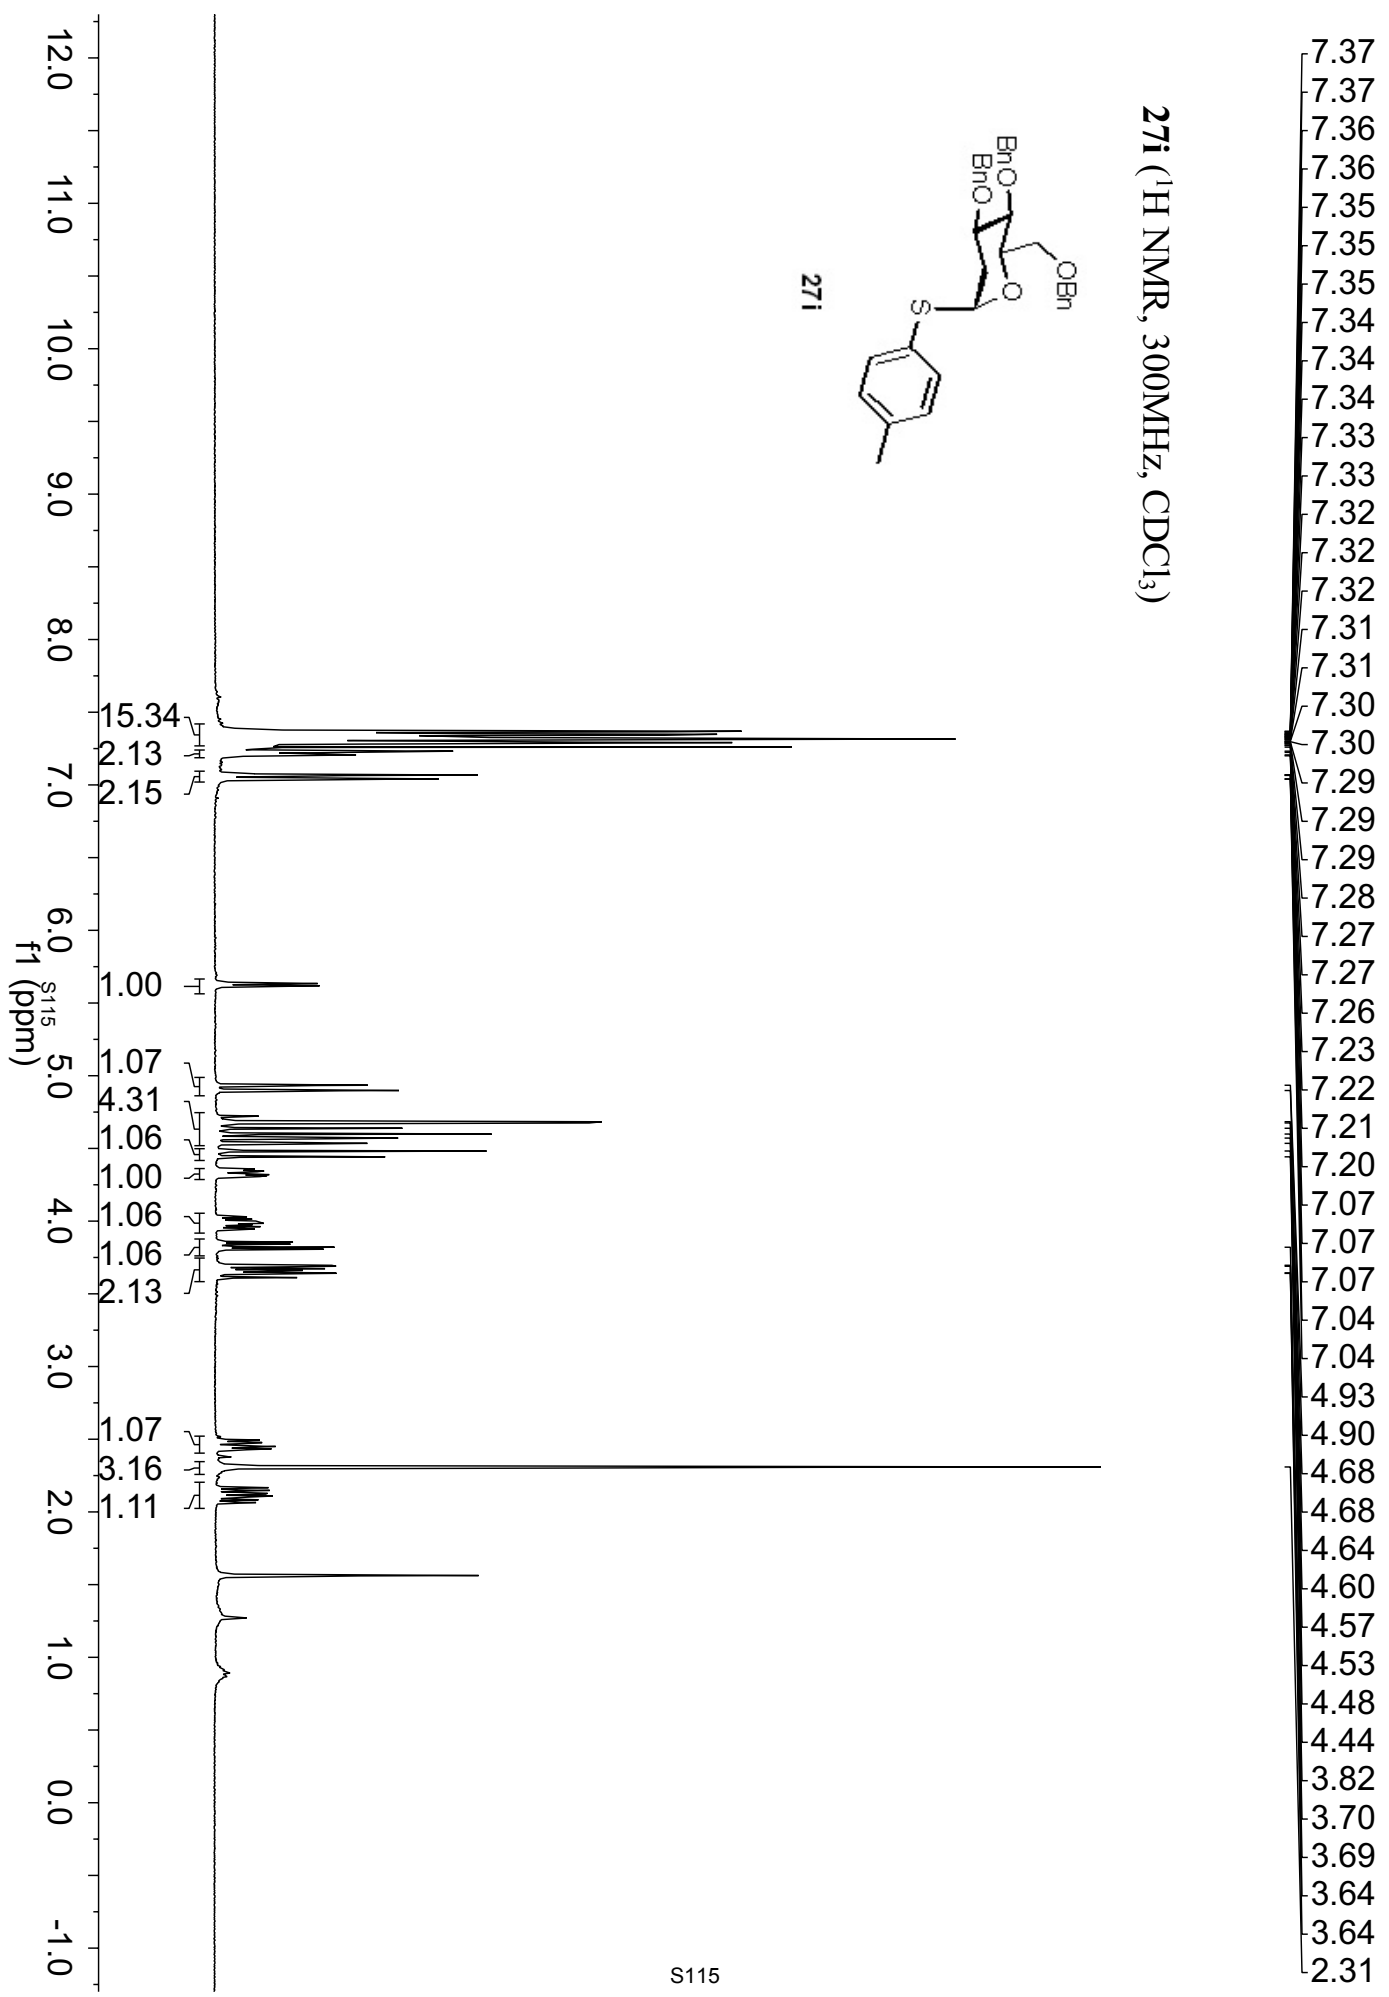

**27i** ( $^{13}\text{C}$  NMR, 75MHz,  $\text{CDCl}_3$ )

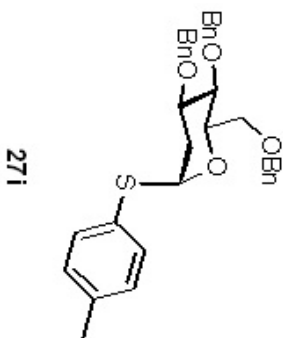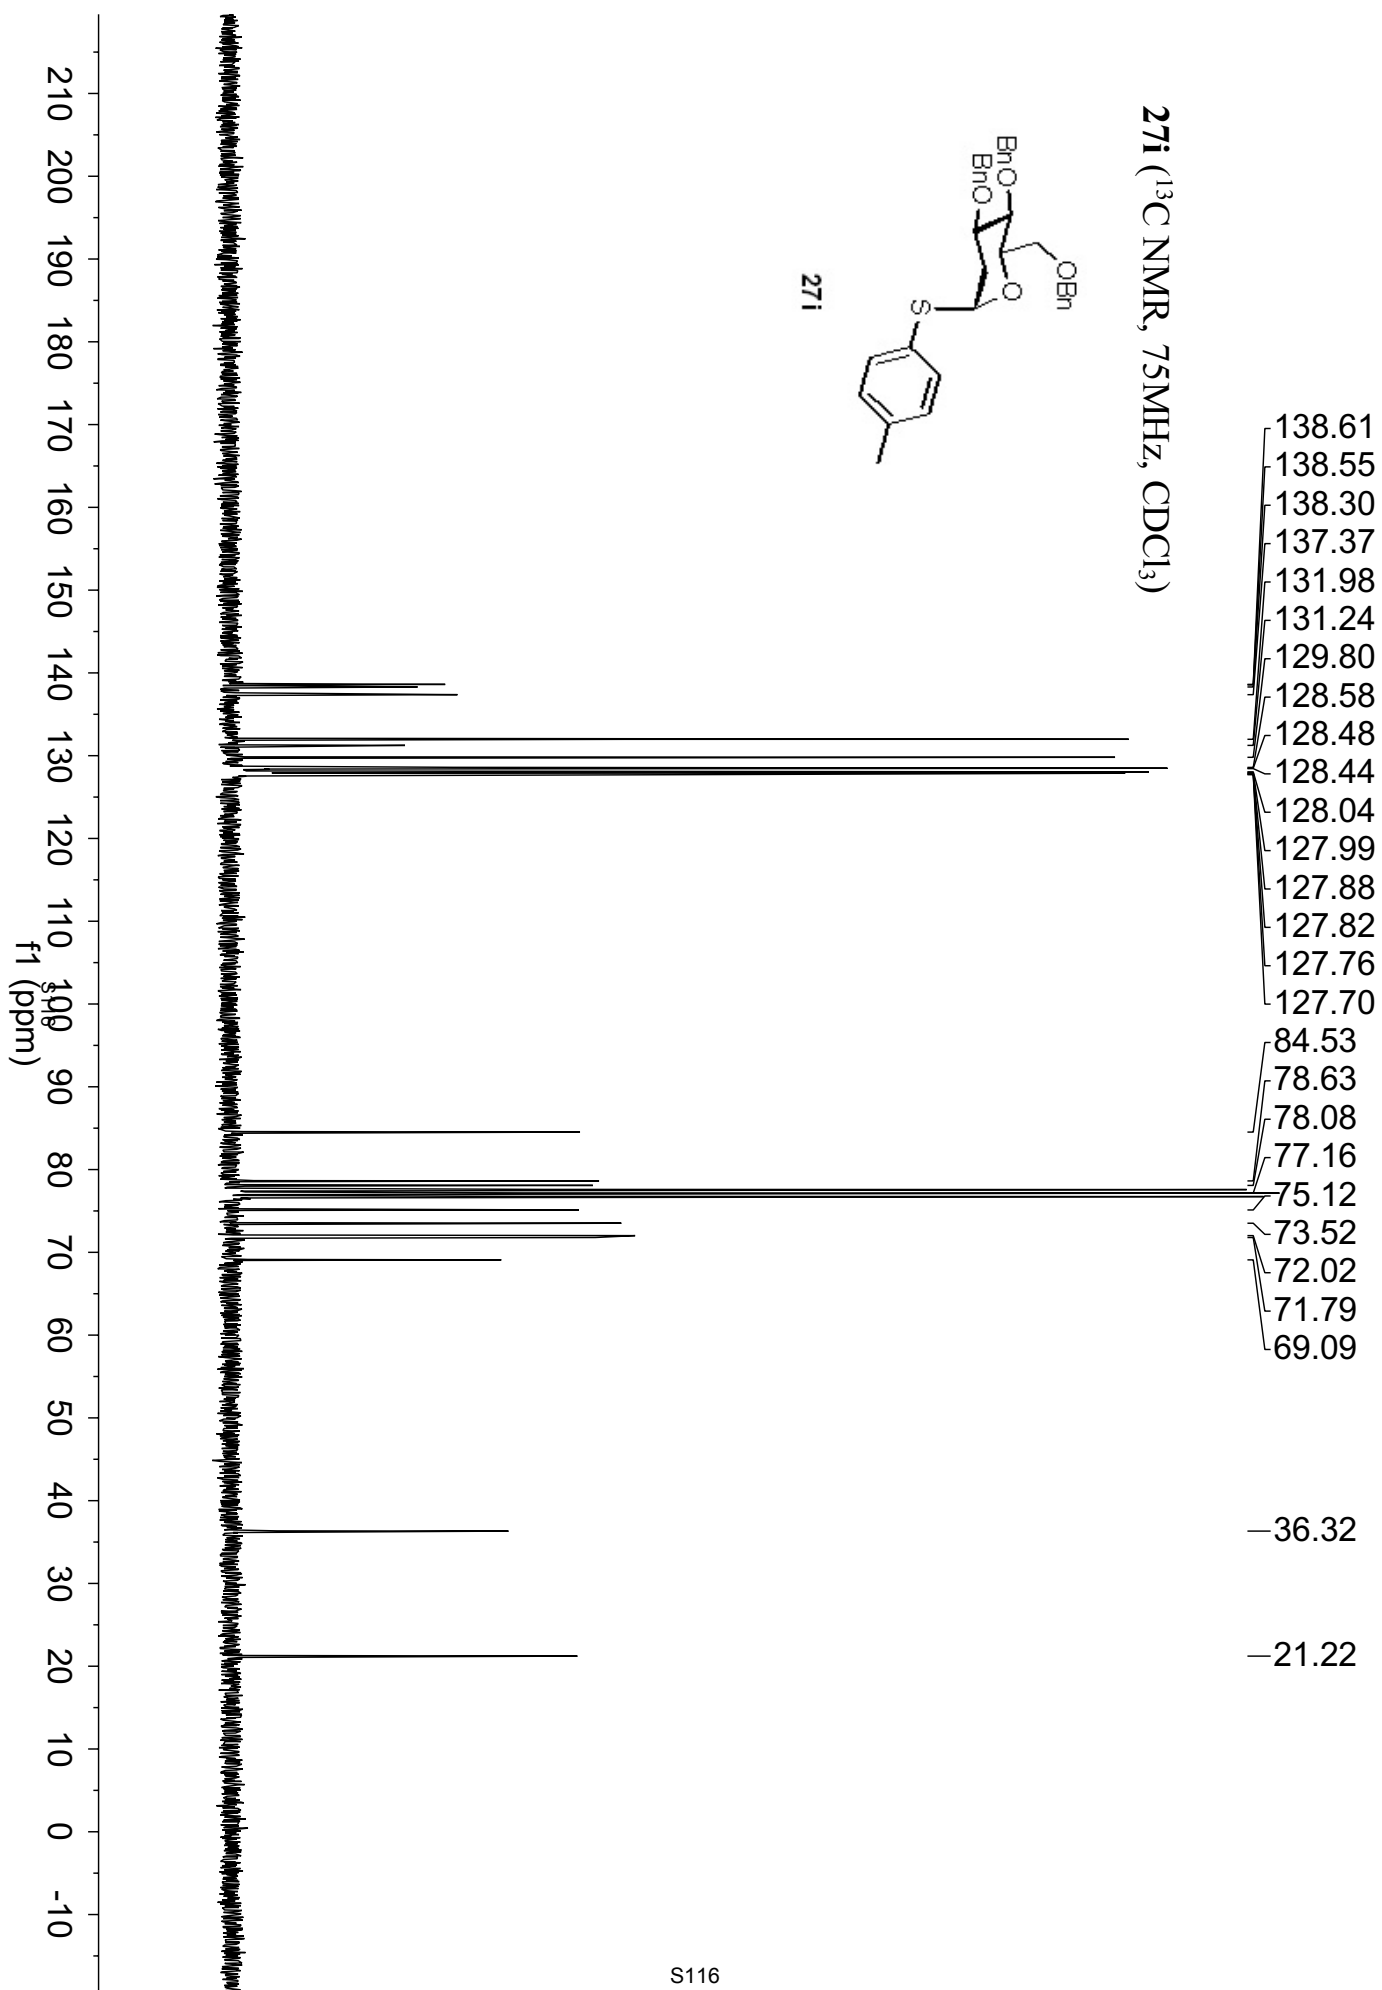

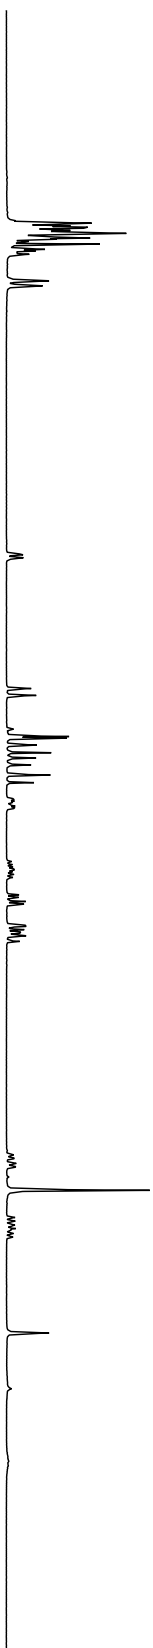

**271** ( $^1\text{H}$ - $^{13}\text{C}$  Coupled HSQC)

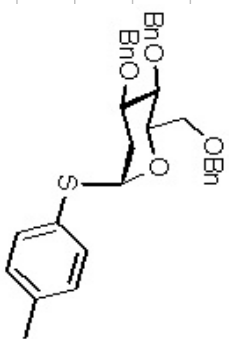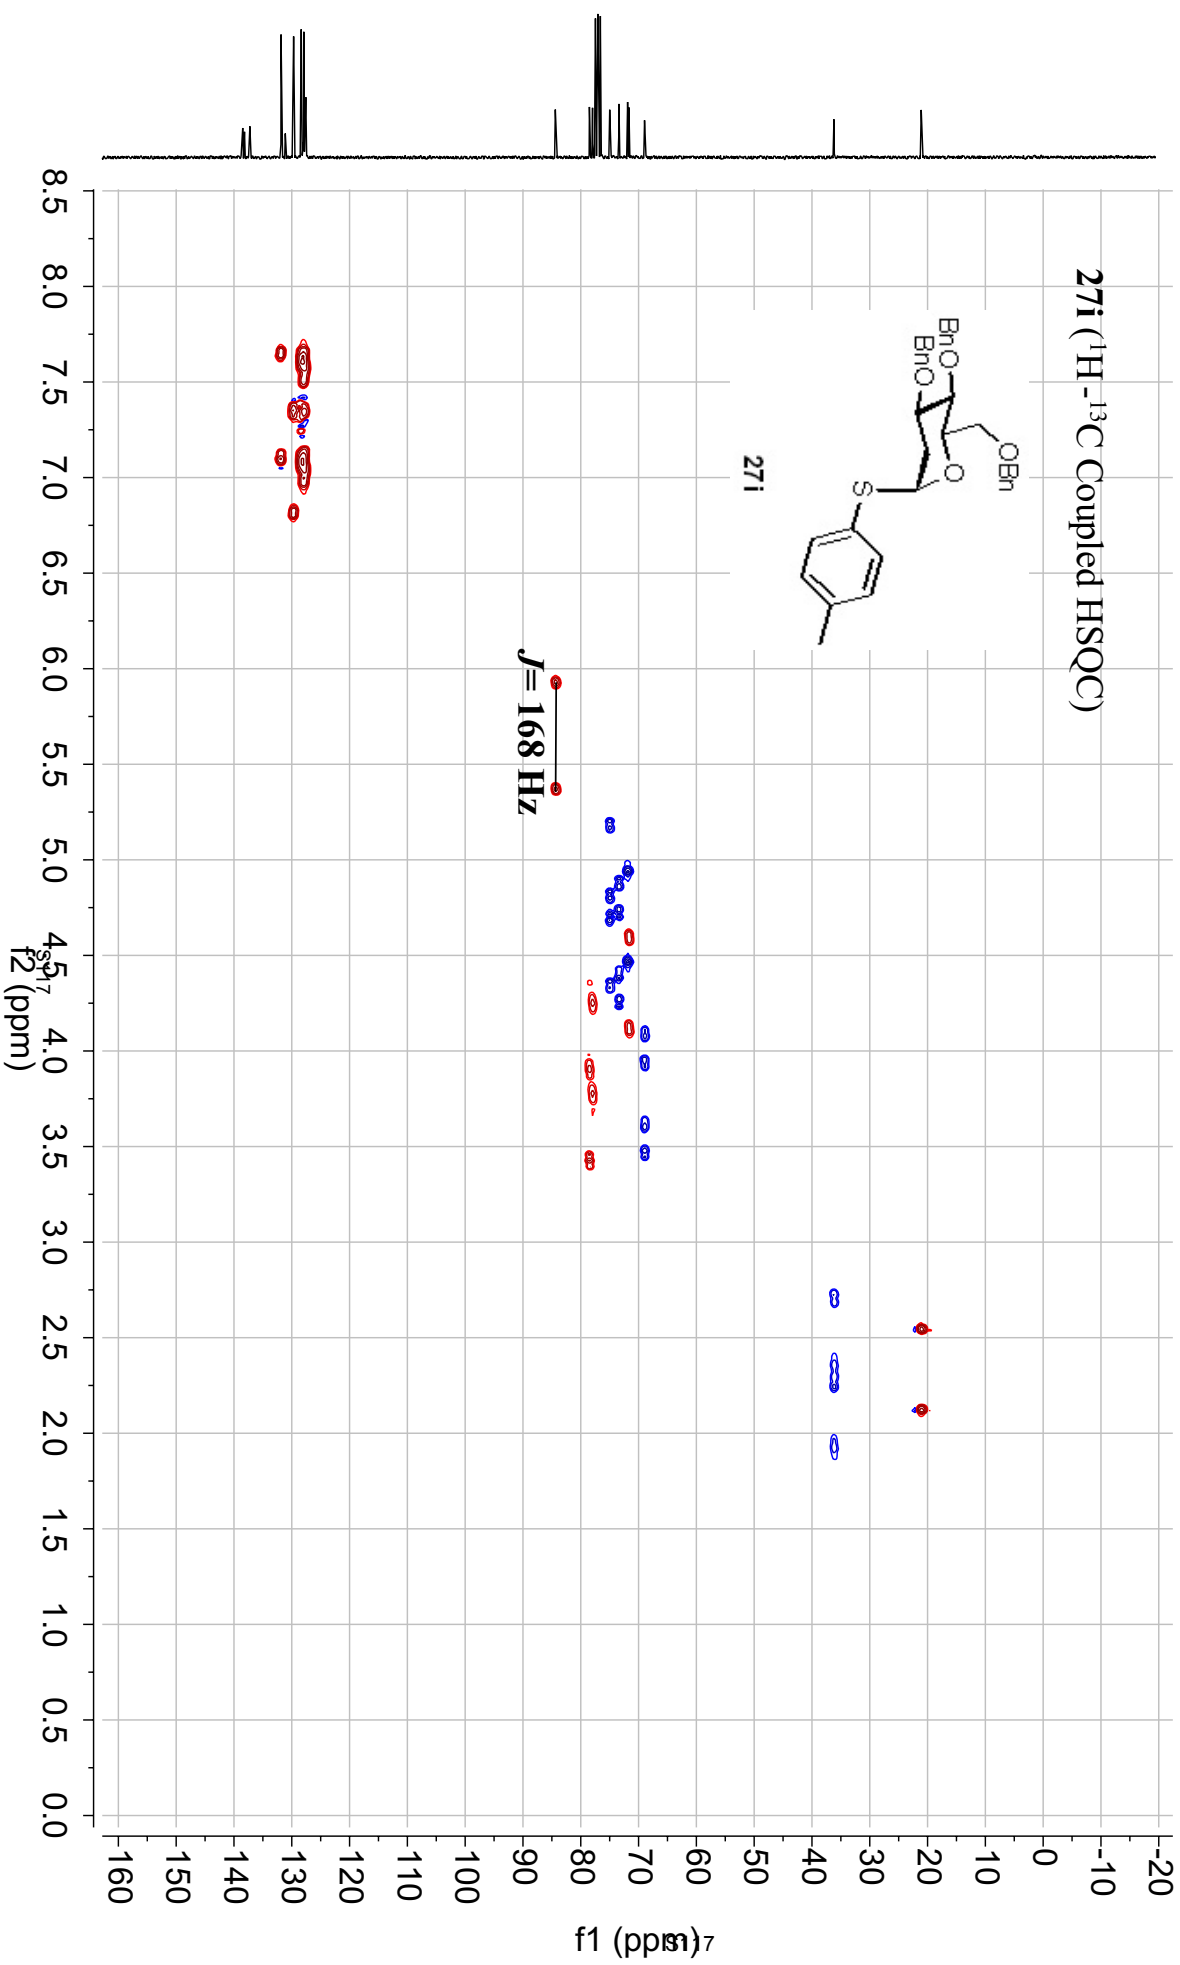

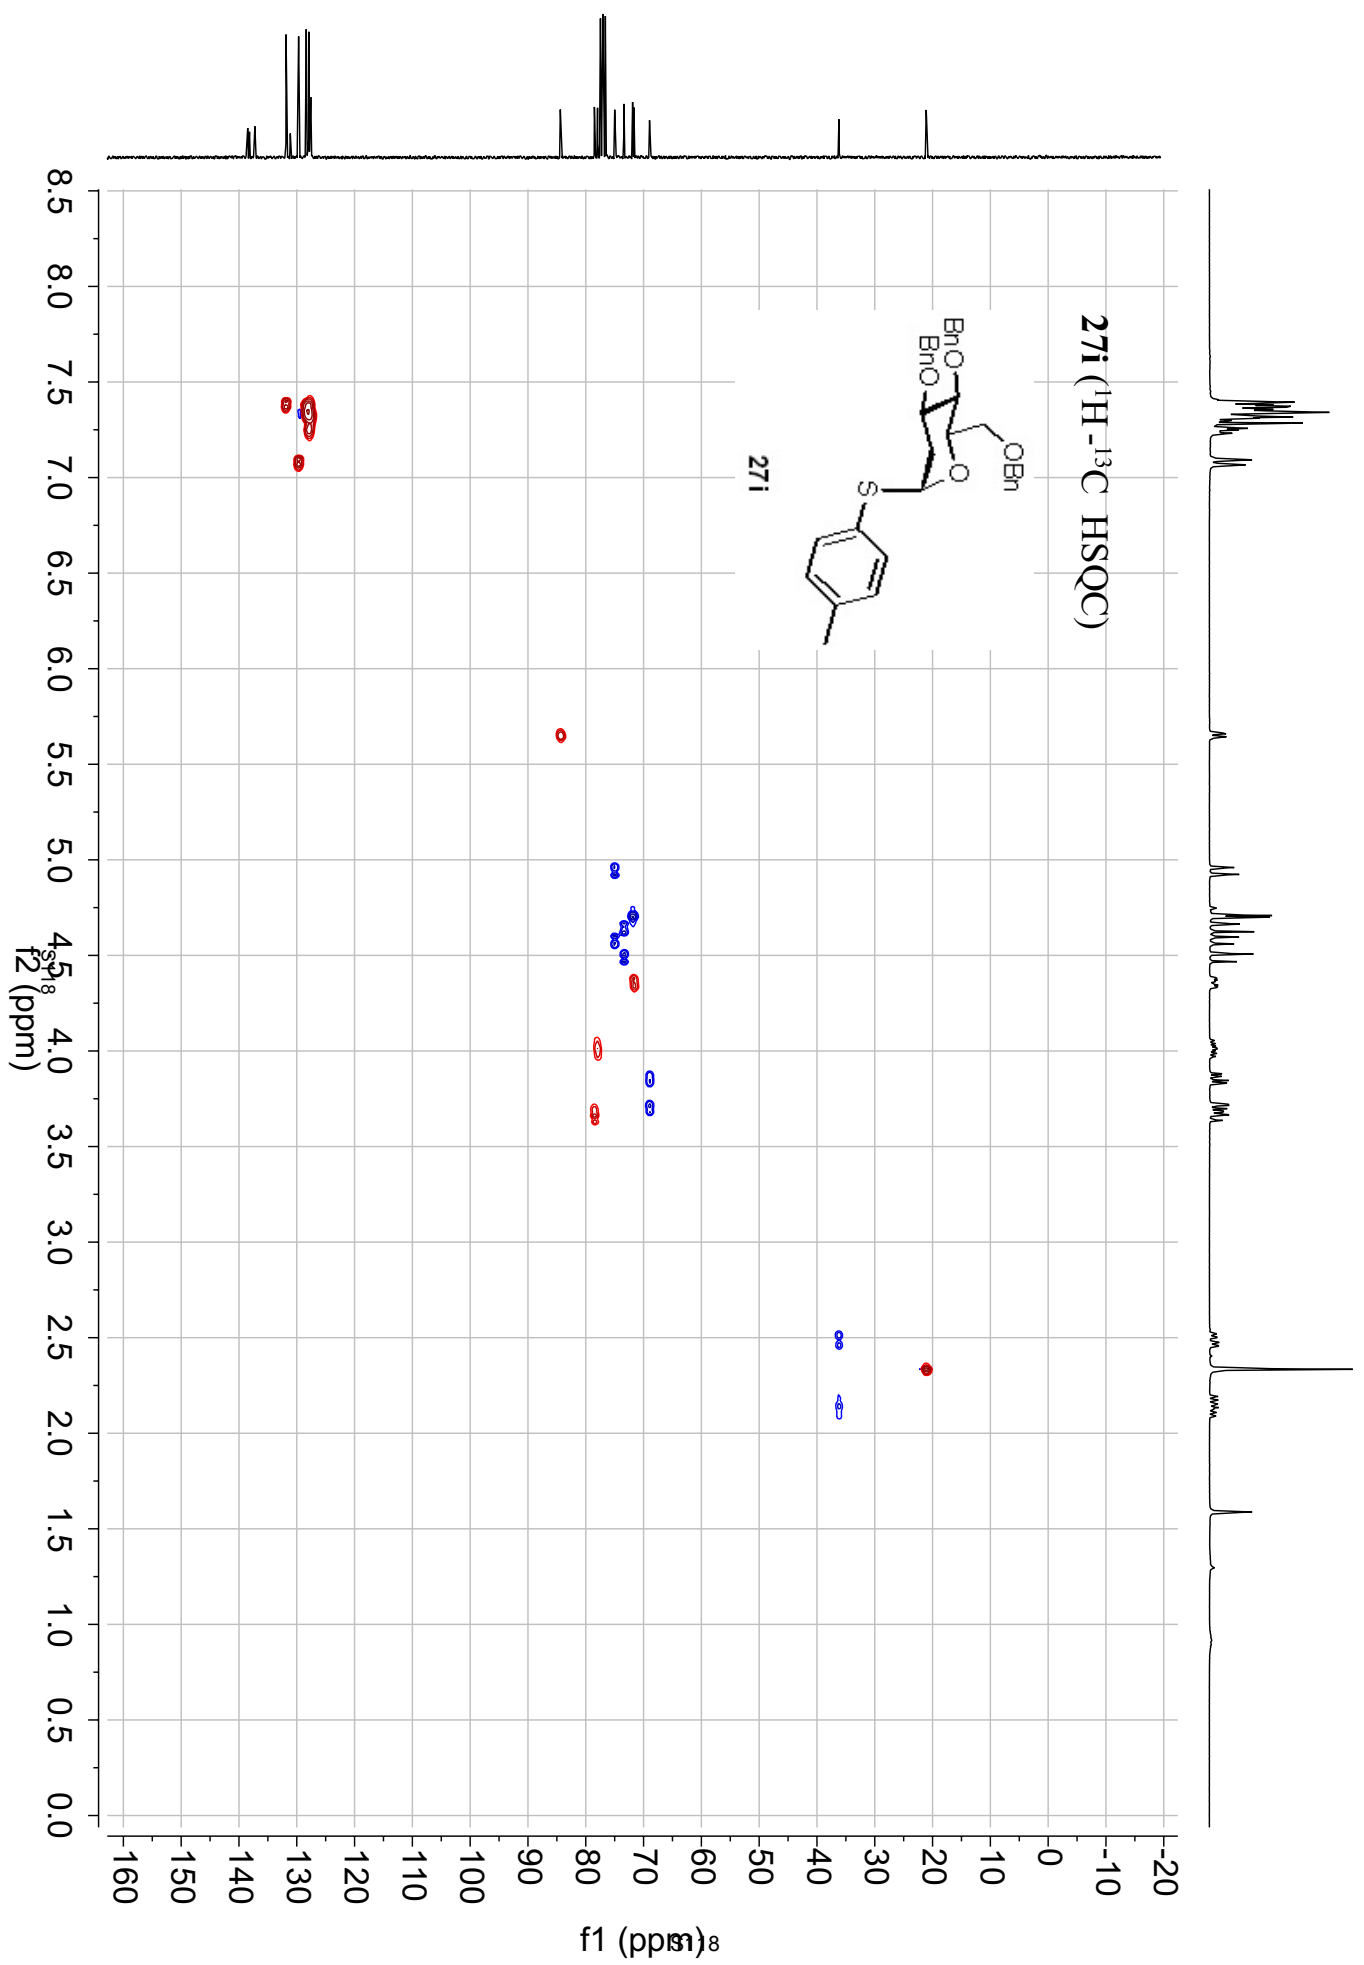

27j (<sup>1</sup>H NMR, 300MHz, CDCl<sub>3</sub>)

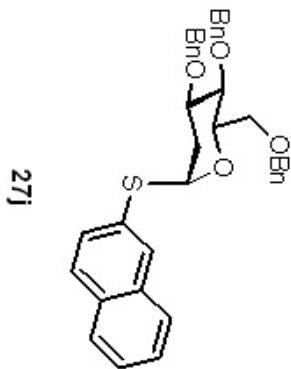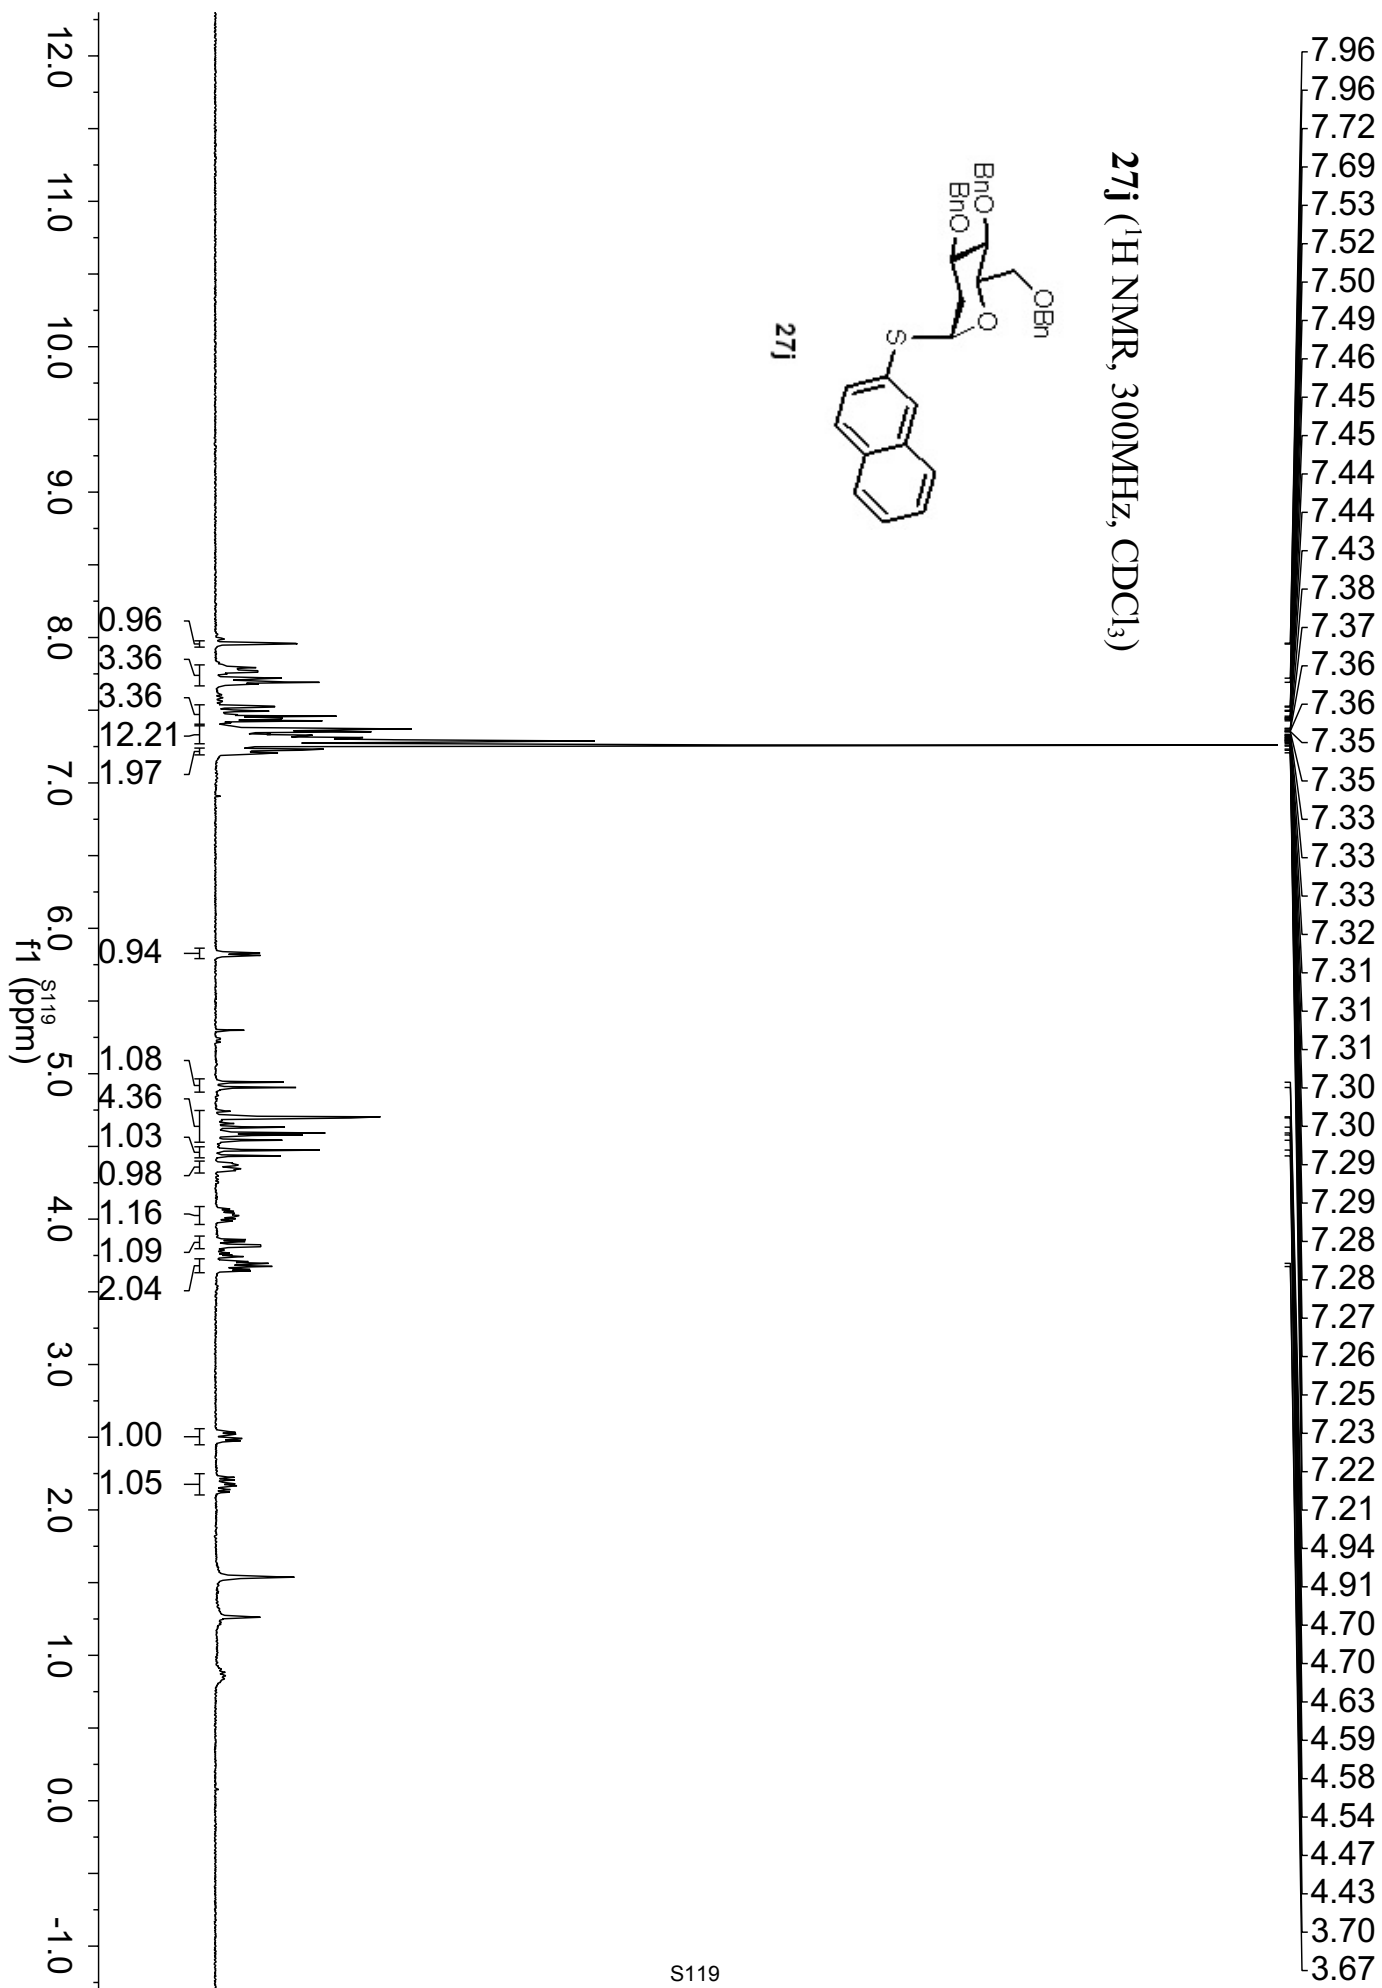

**27j** ( $^{13}\text{C}$  NMR, 75MHz,  $\text{CDCl}_3$ )

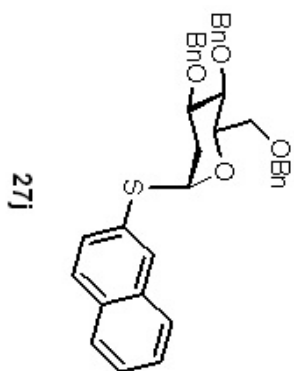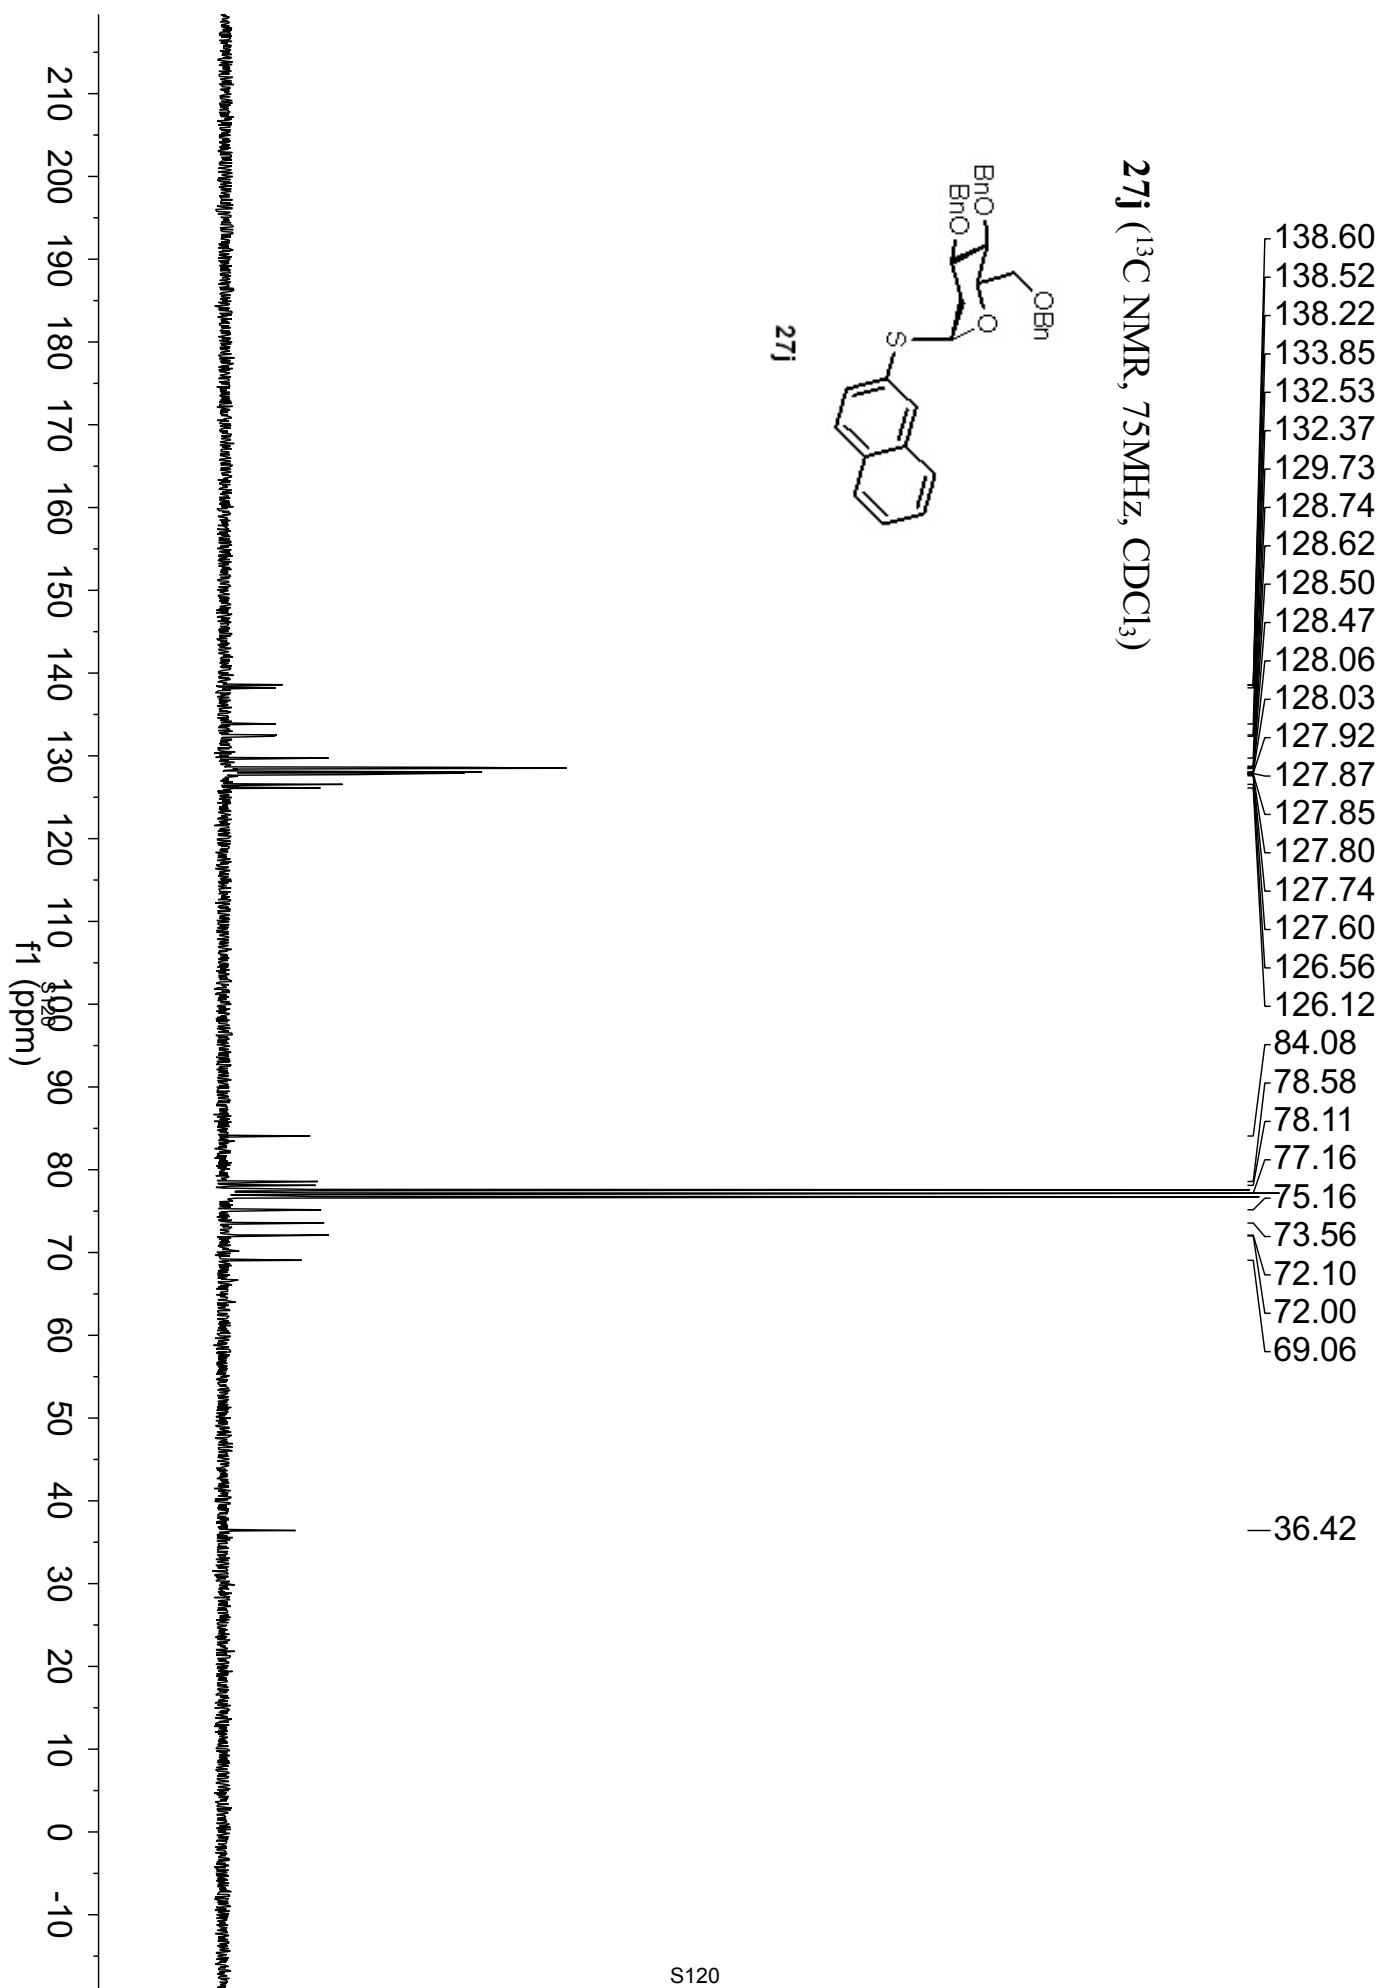



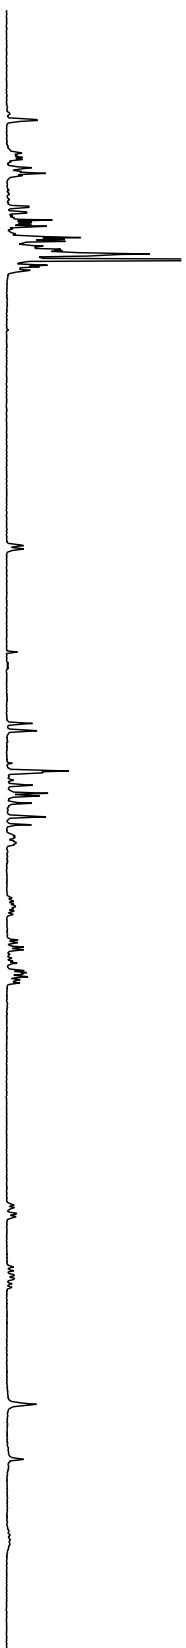

**27j** ( $^1\text{H}$ - $^{13}\text{C}$  Coupled HSQC)

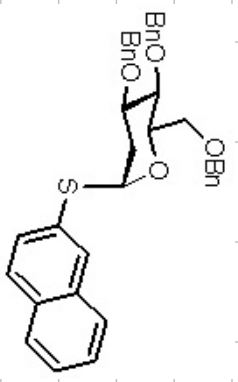

27j

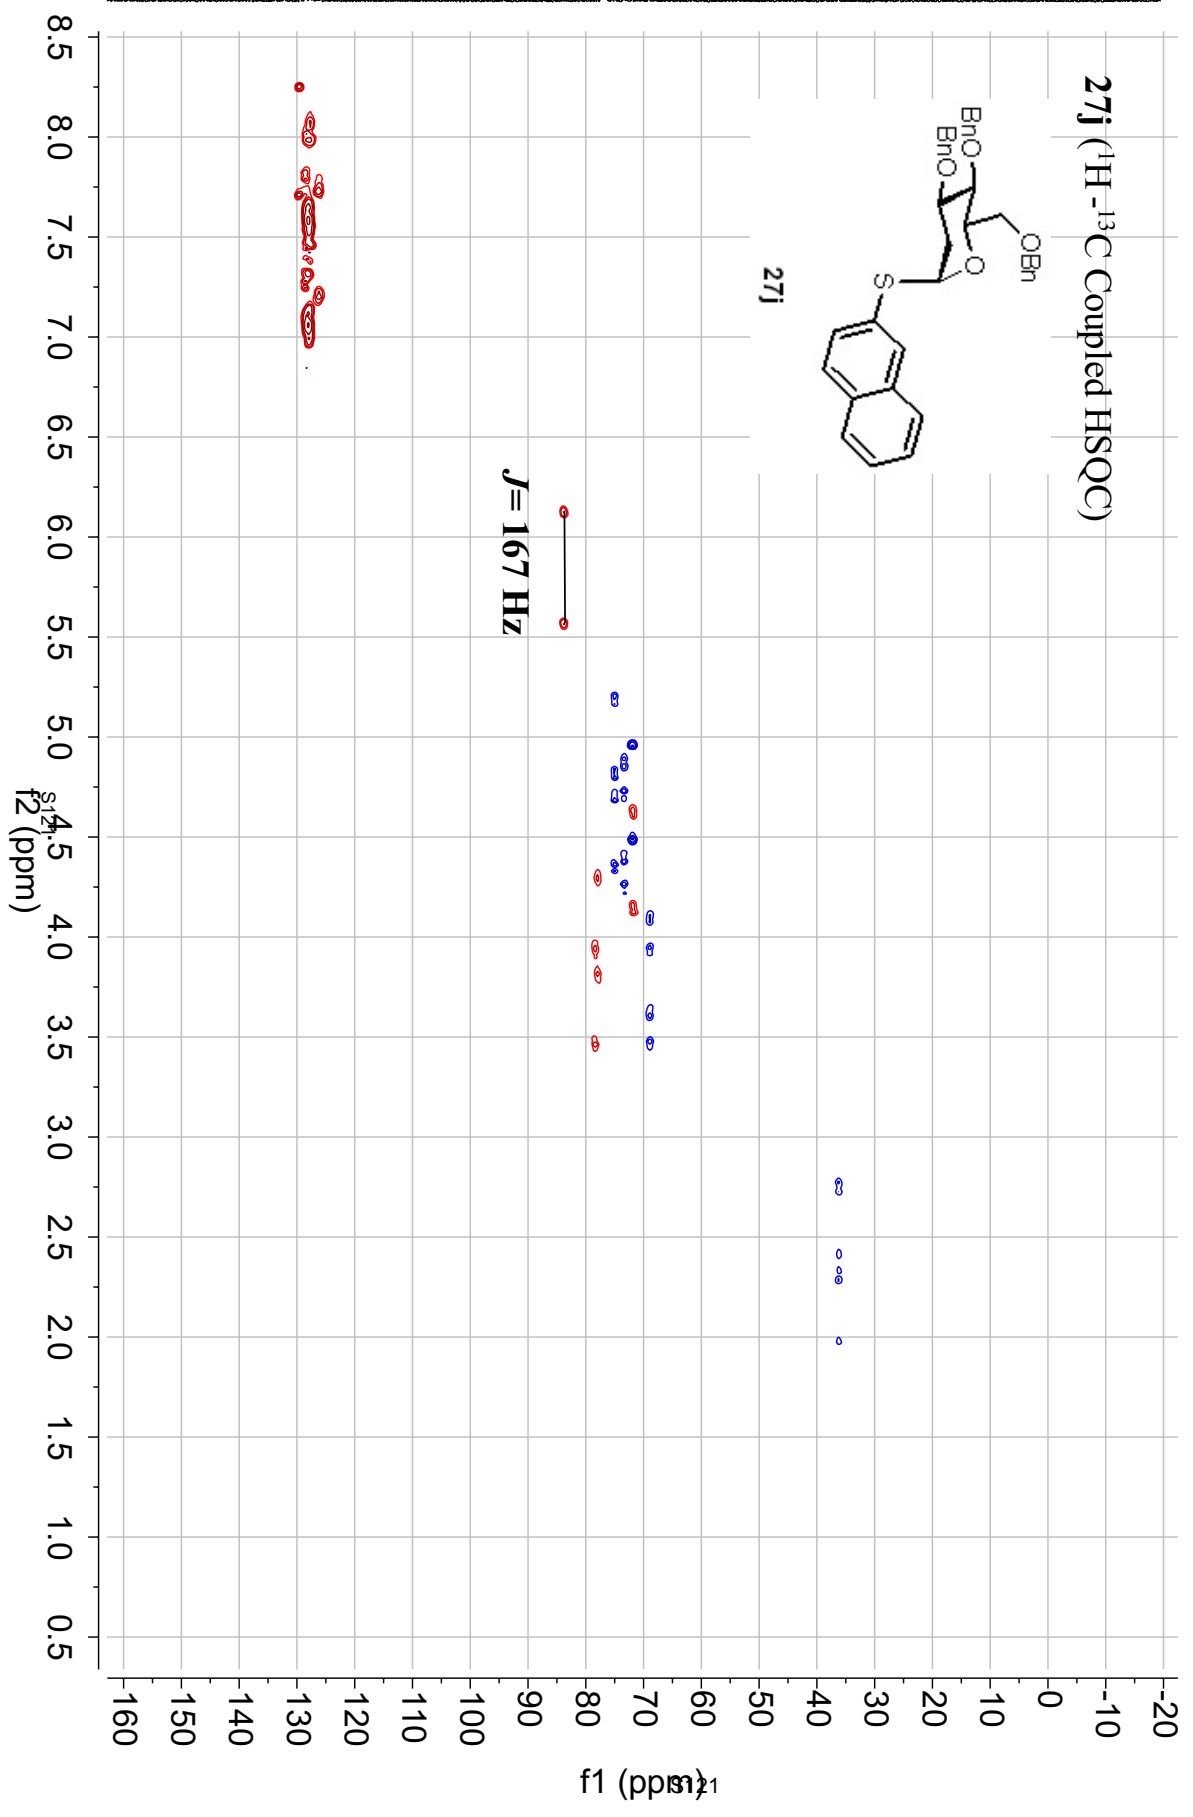



27k (<sup>1</sup>H NMR, 300MHz, CDCl<sub>3</sub>)

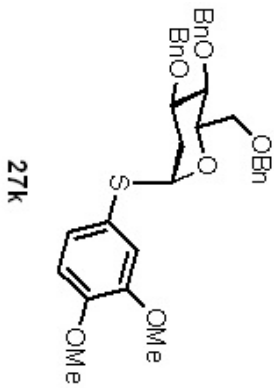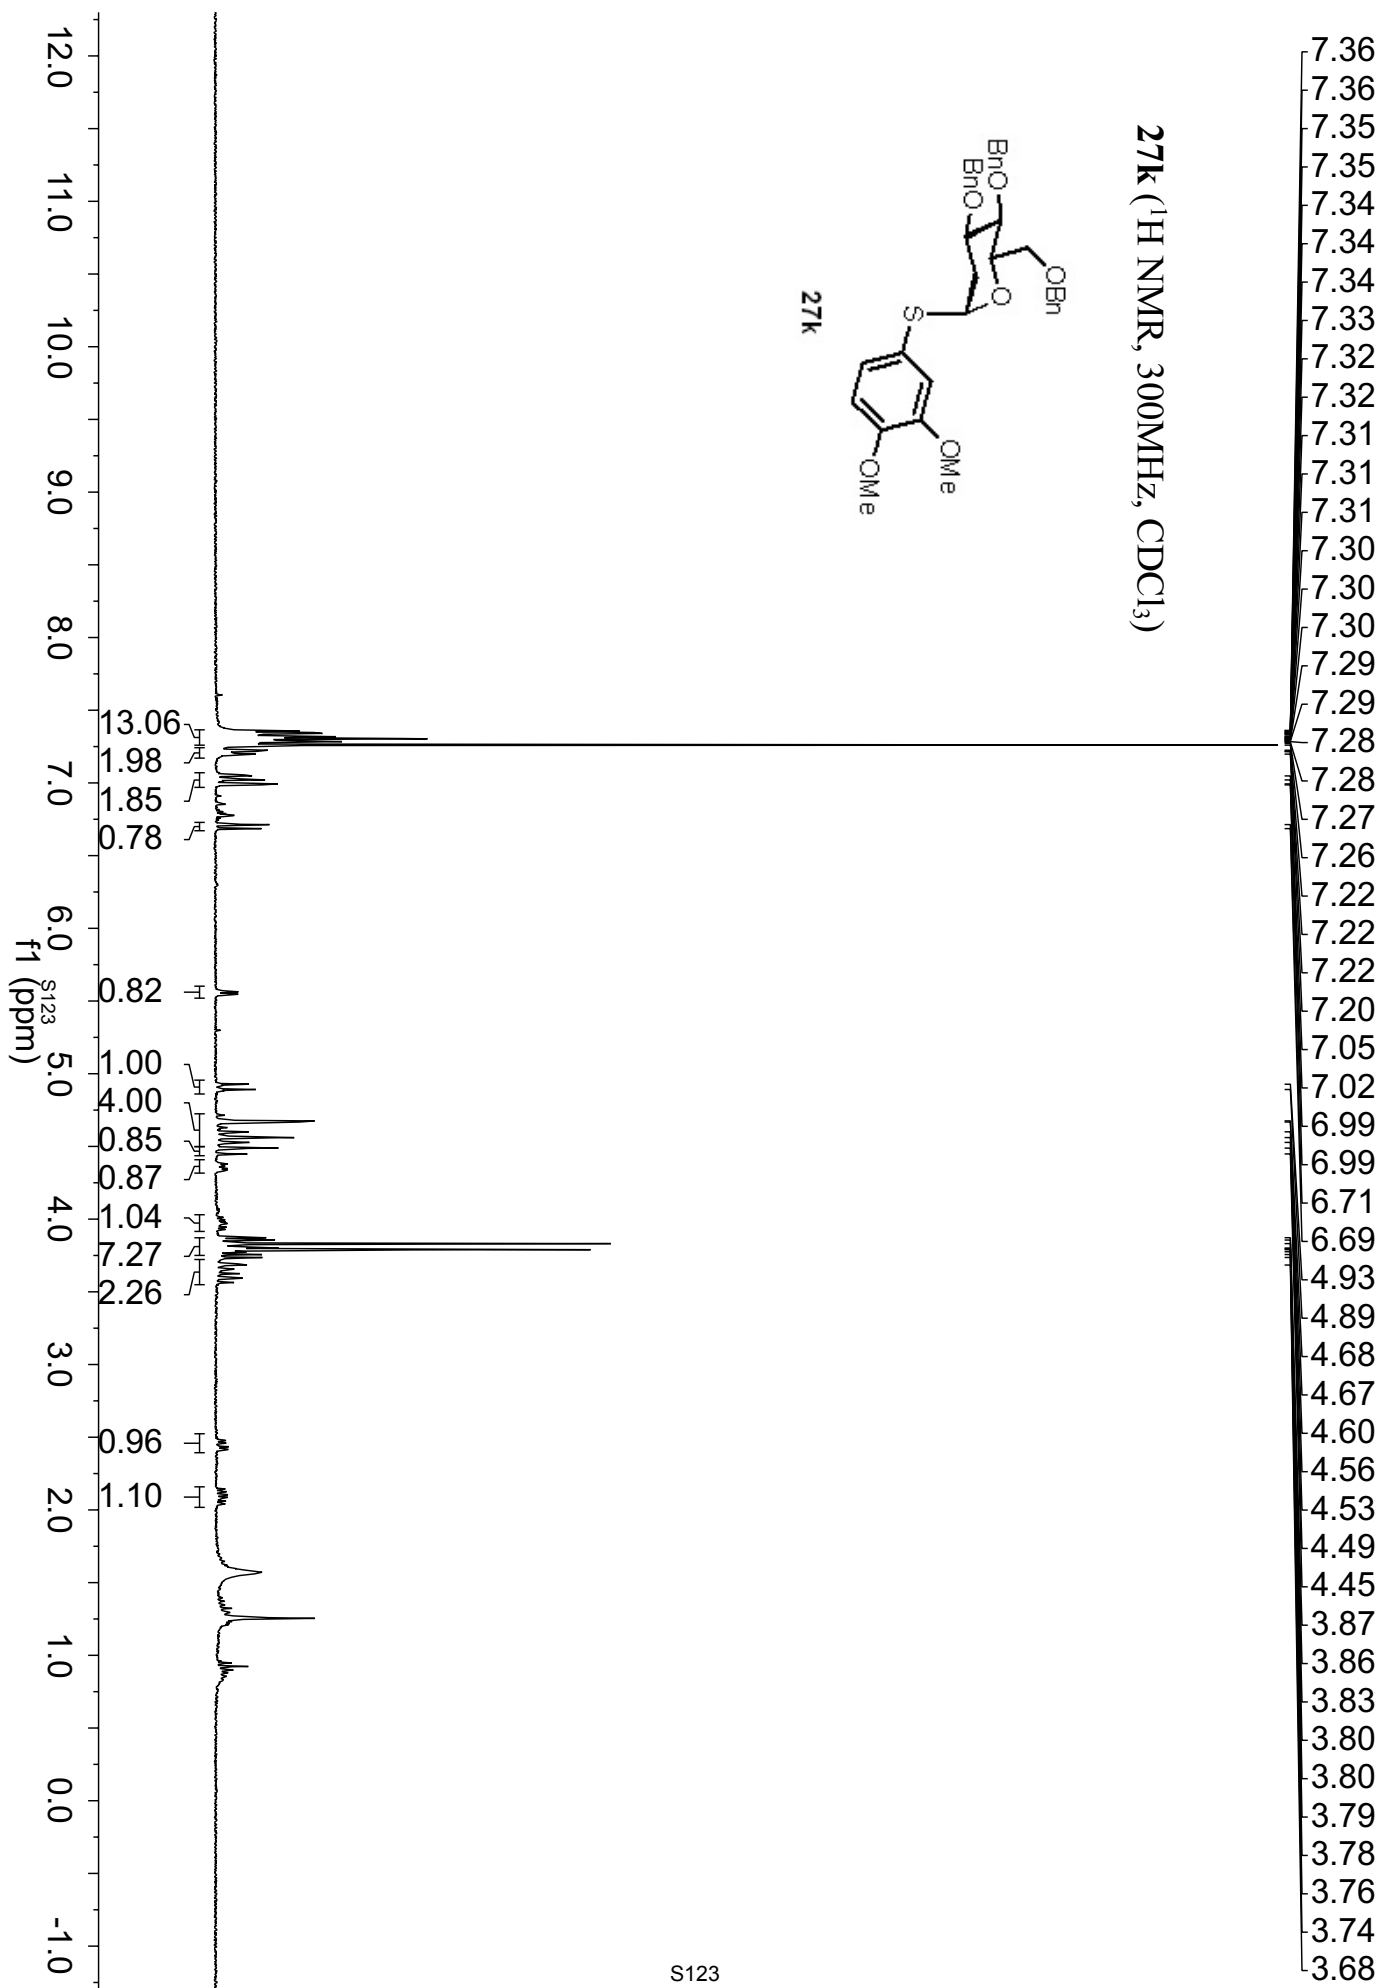

27k (<sup>13</sup>C NMR, 75MHz, CDCl<sub>3</sub>)

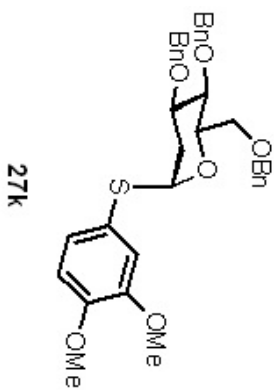

27k

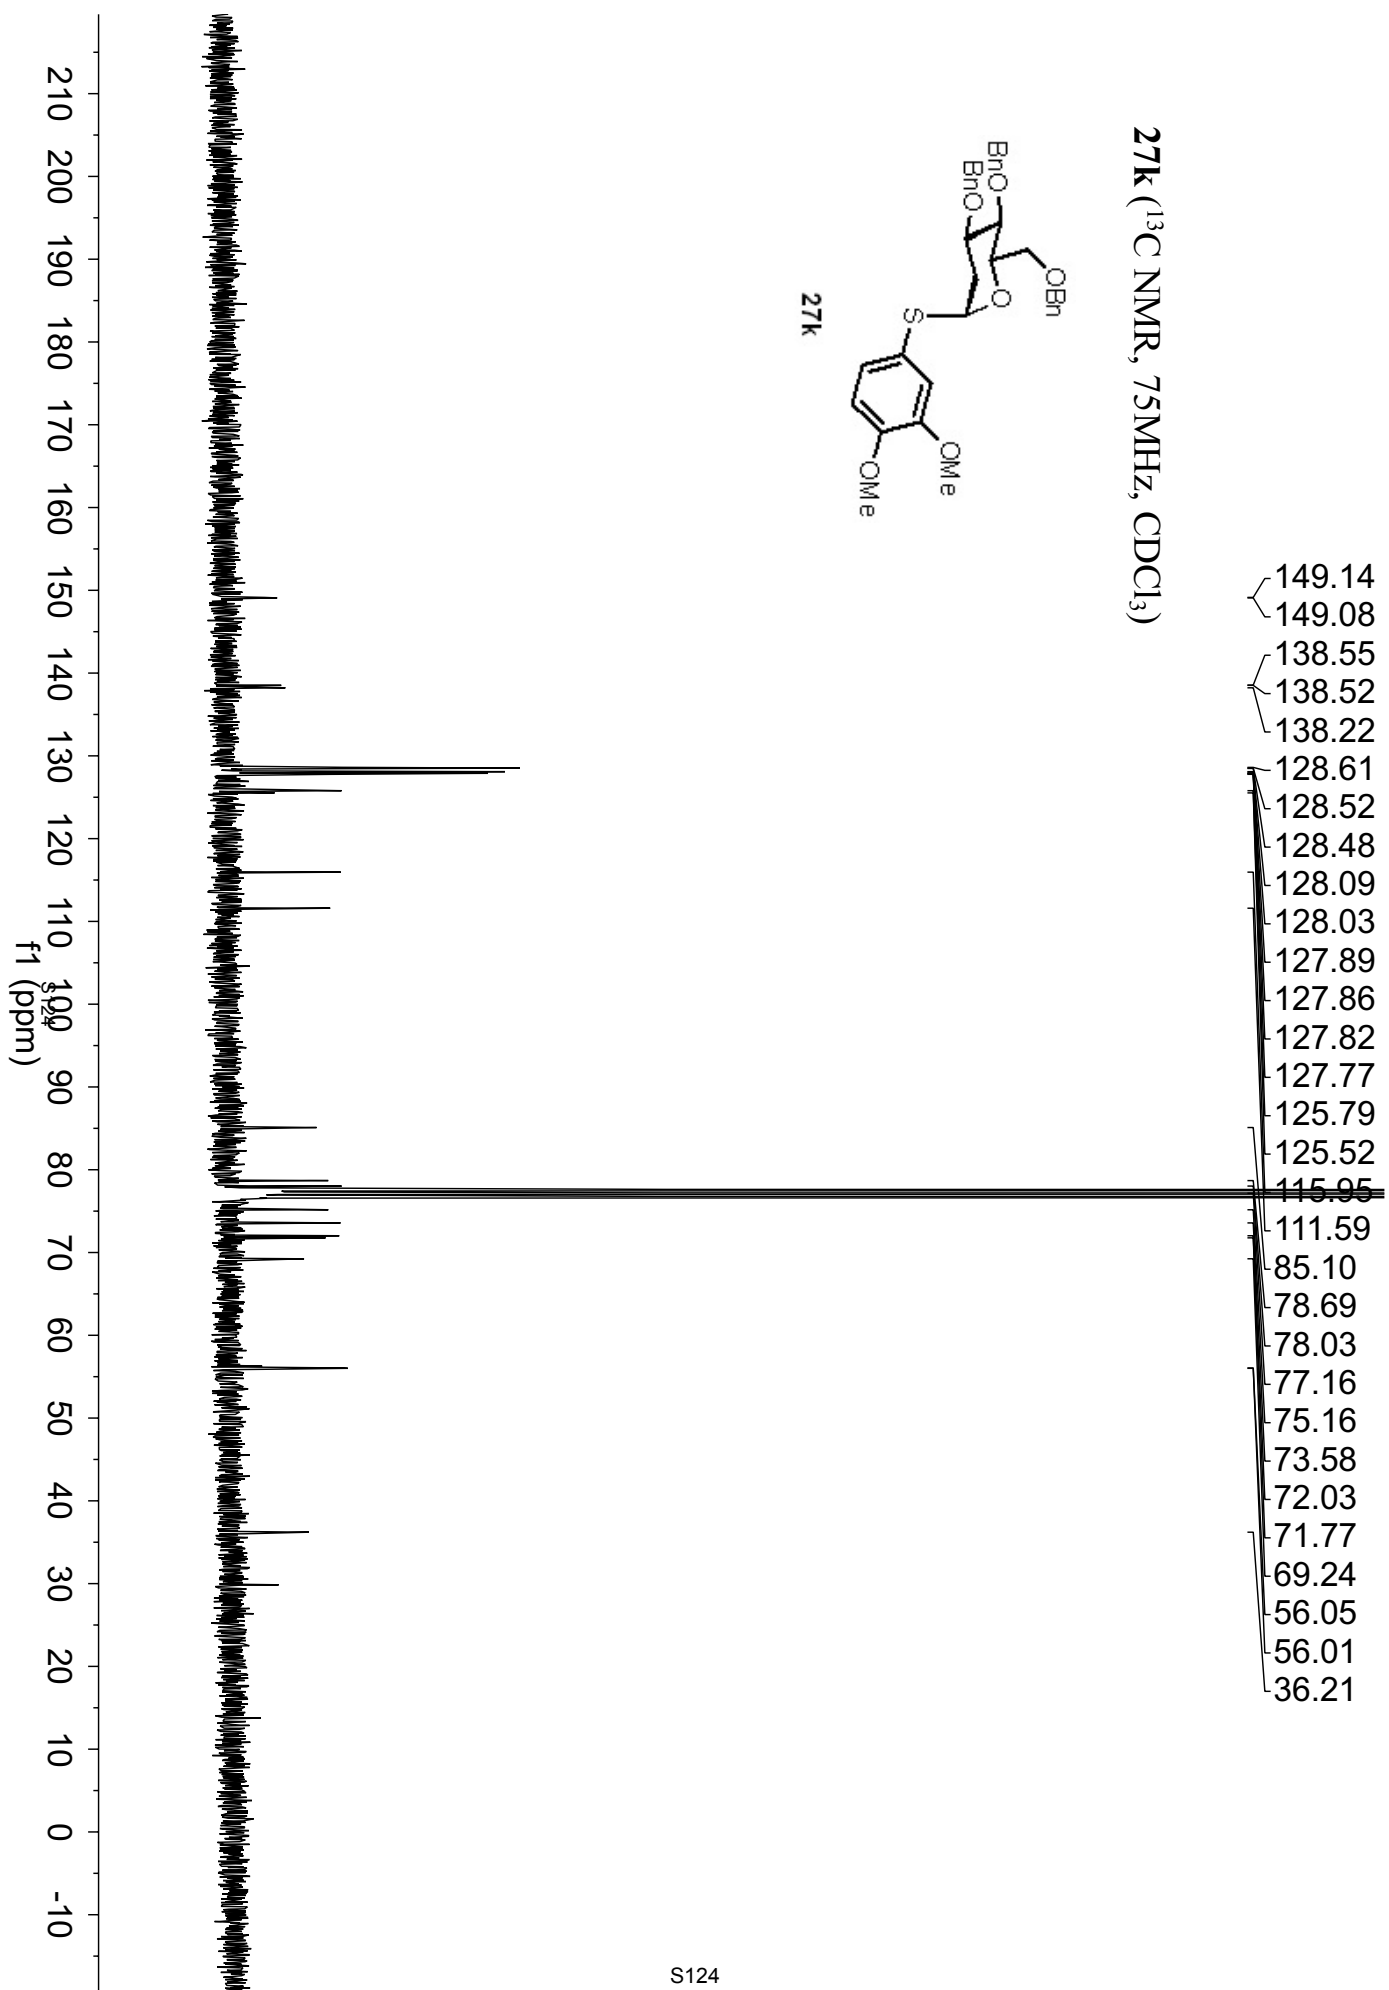

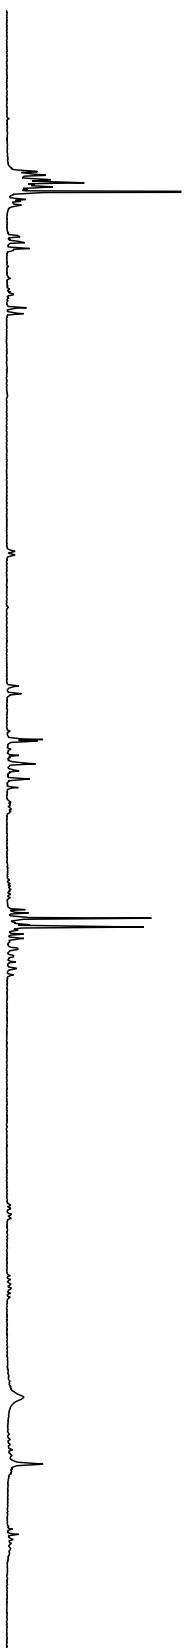

27k (<sup>1</sup>H-<sup>13</sup>C Coupled HSQC)

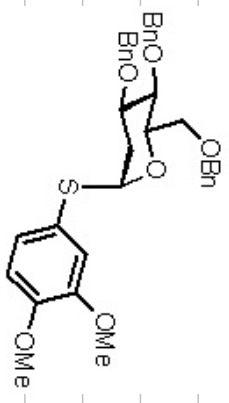

27k

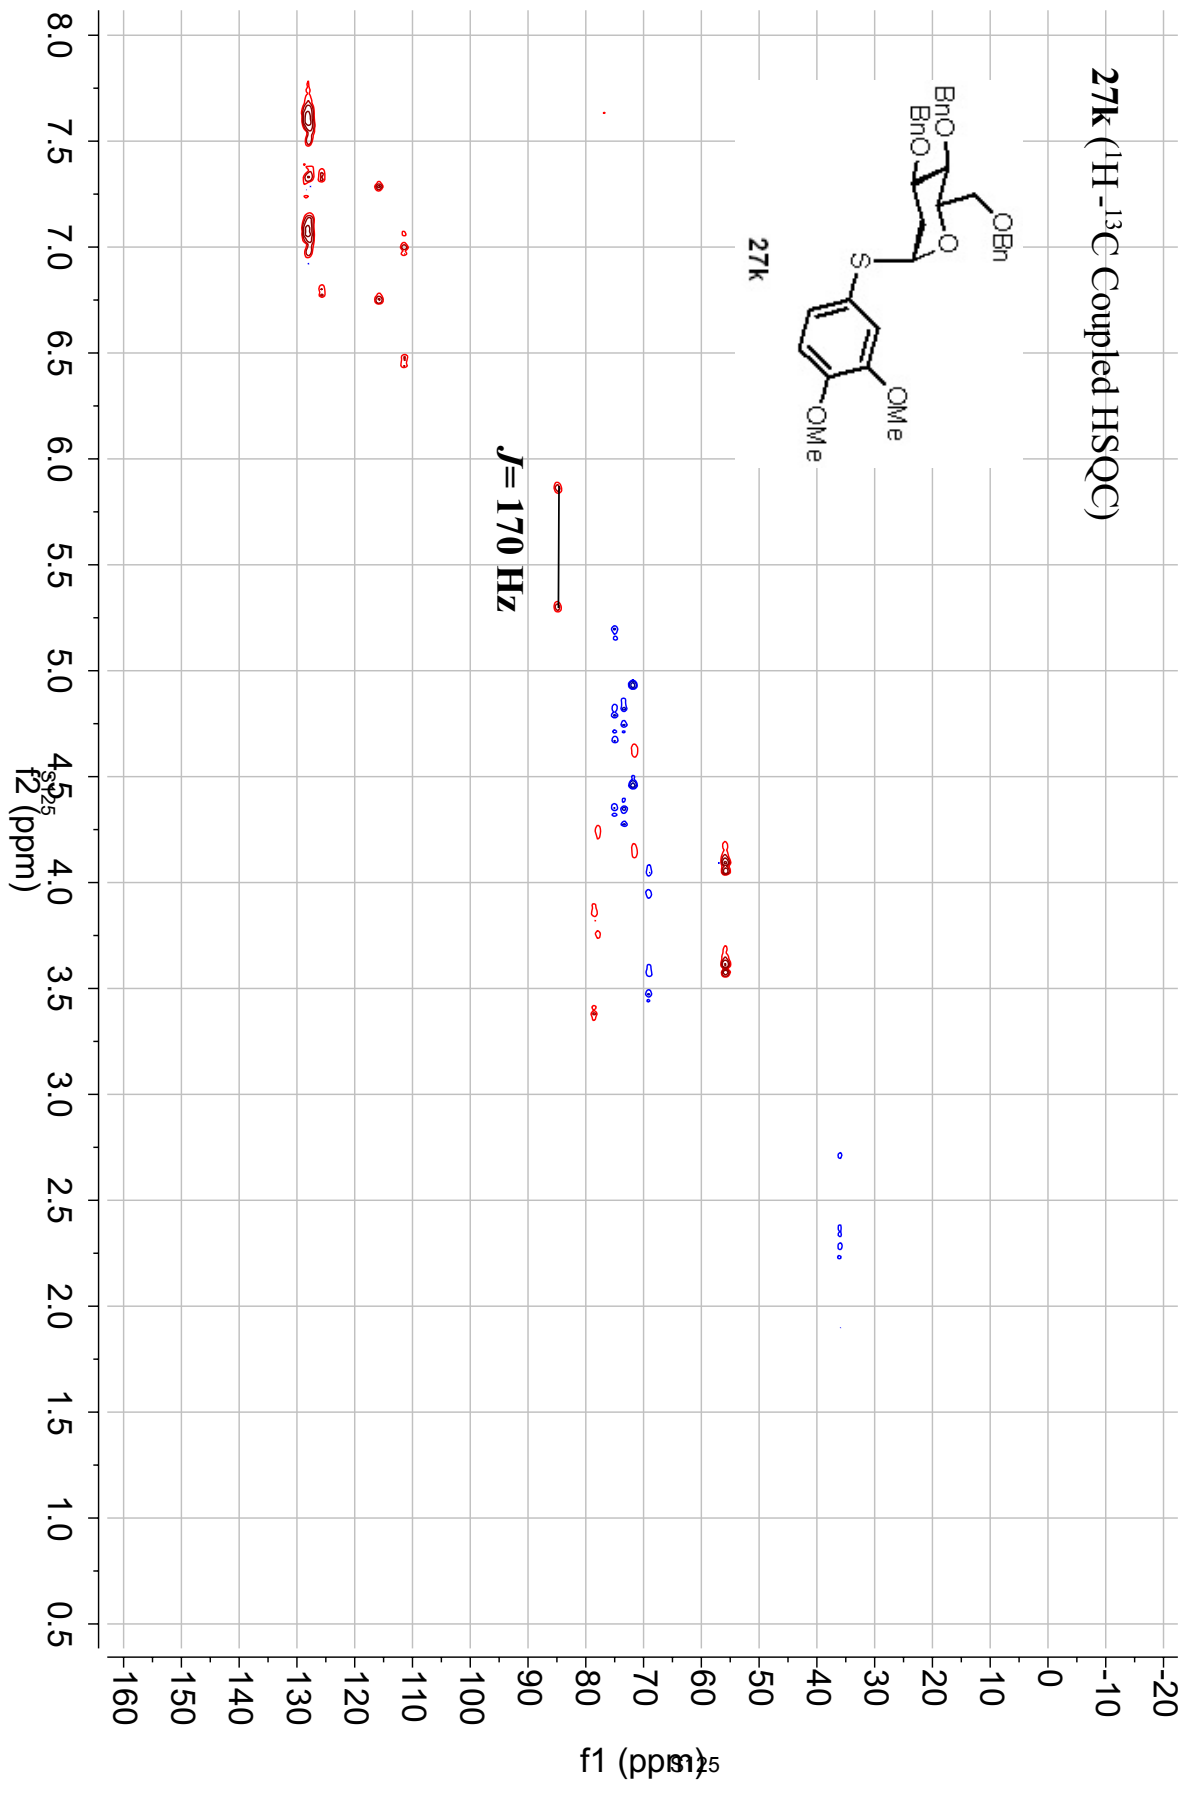

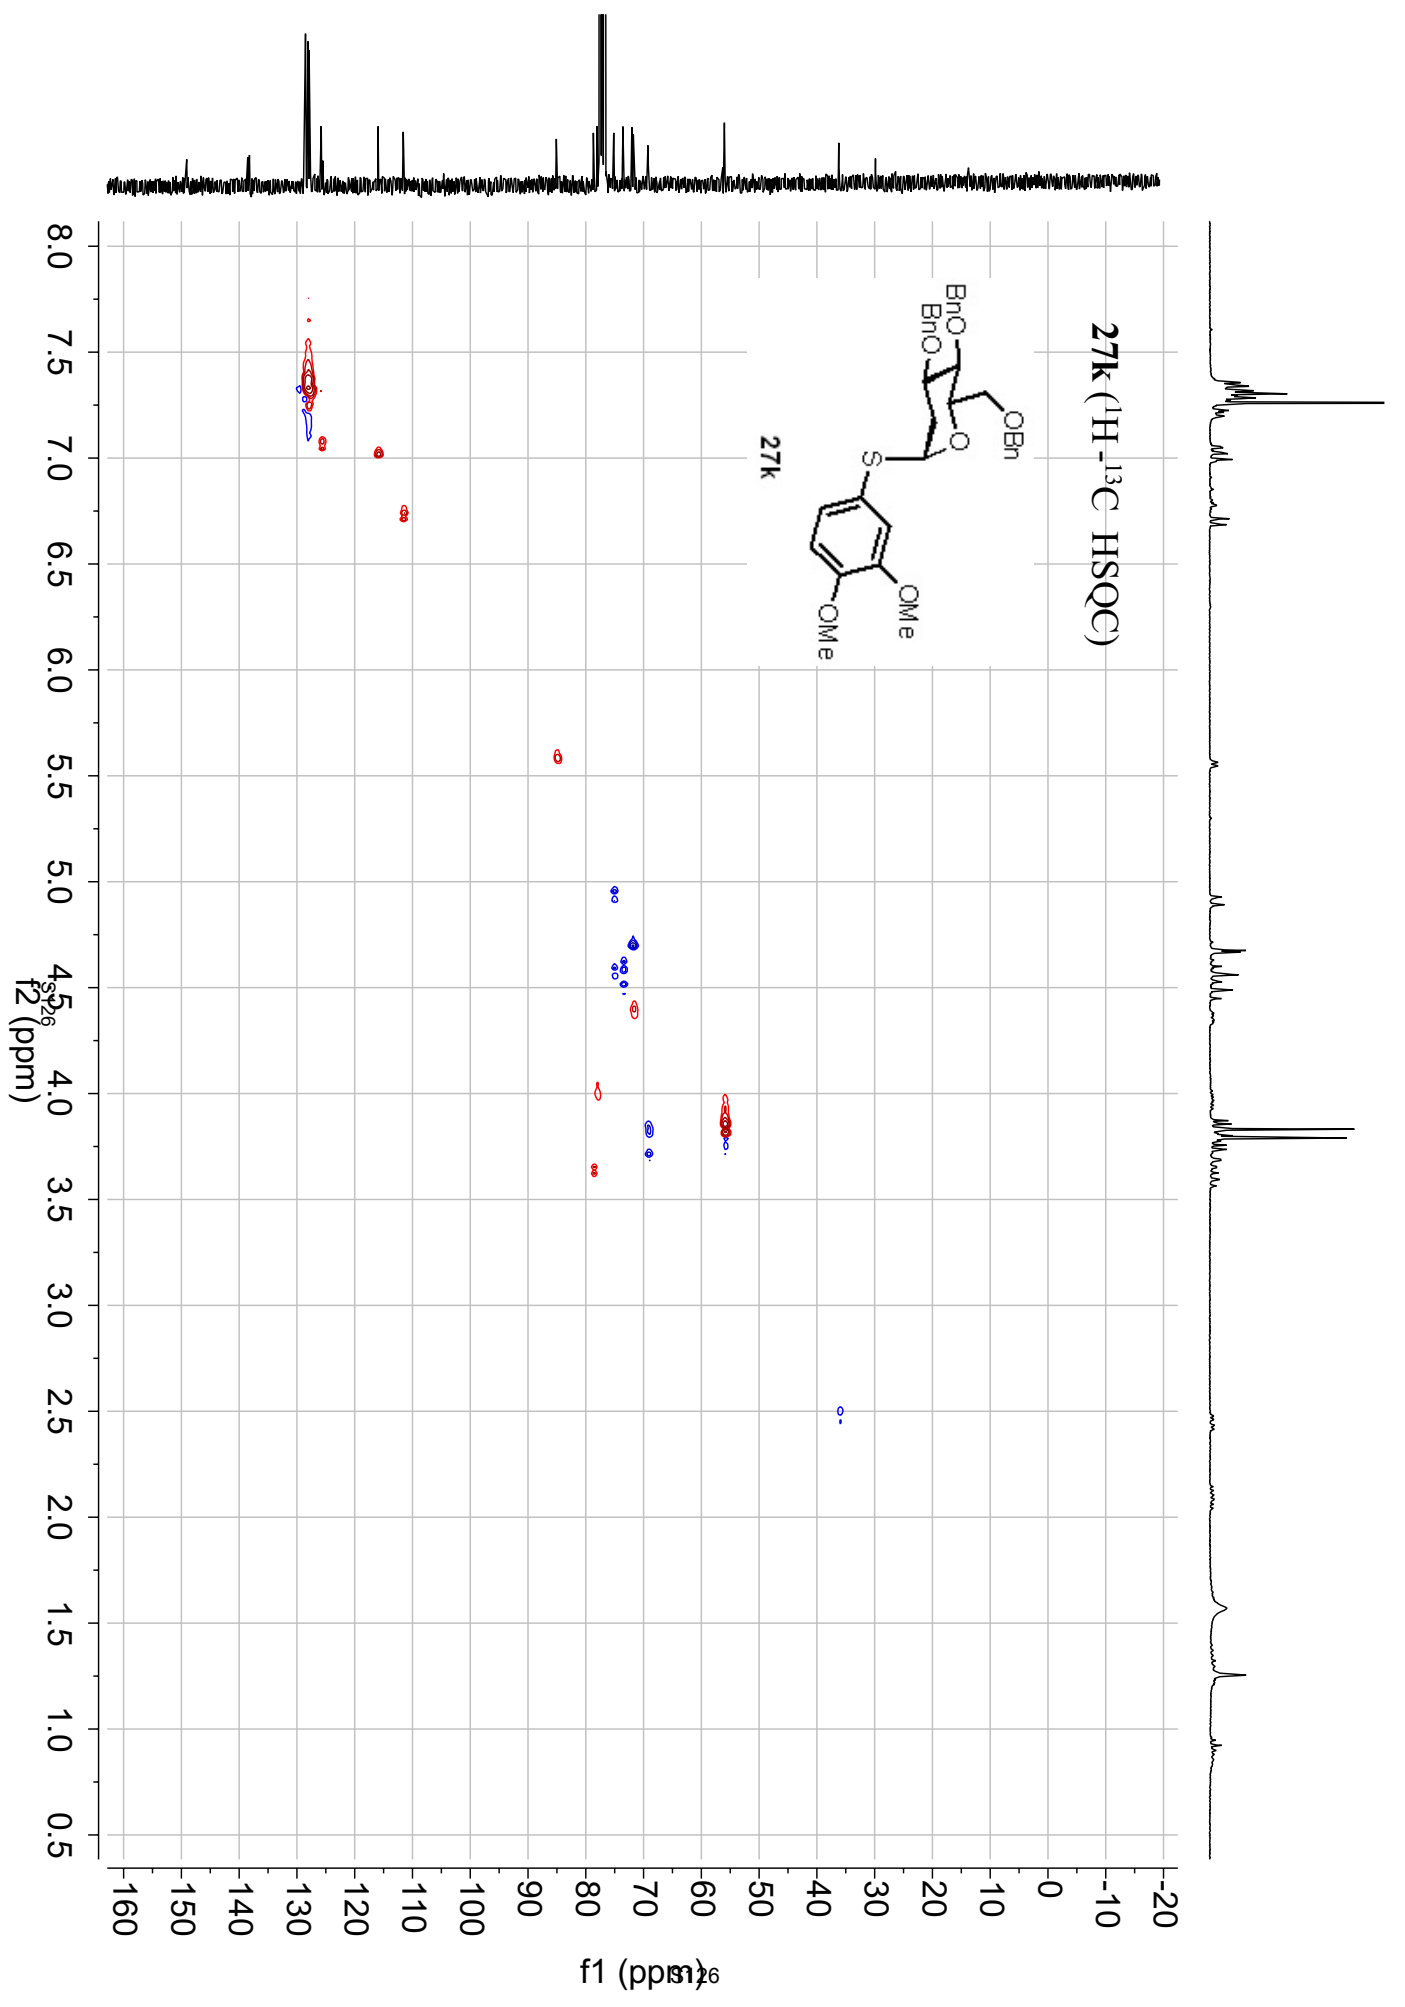

271 (<sup>1</sup>H NMR, 300MHz, CDCl<sub>3</sub>)

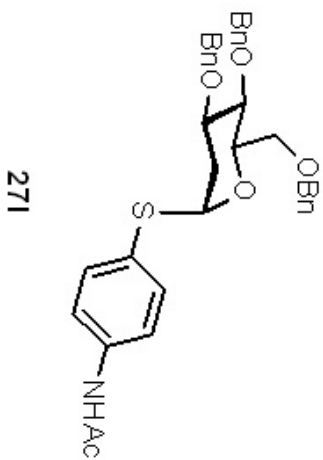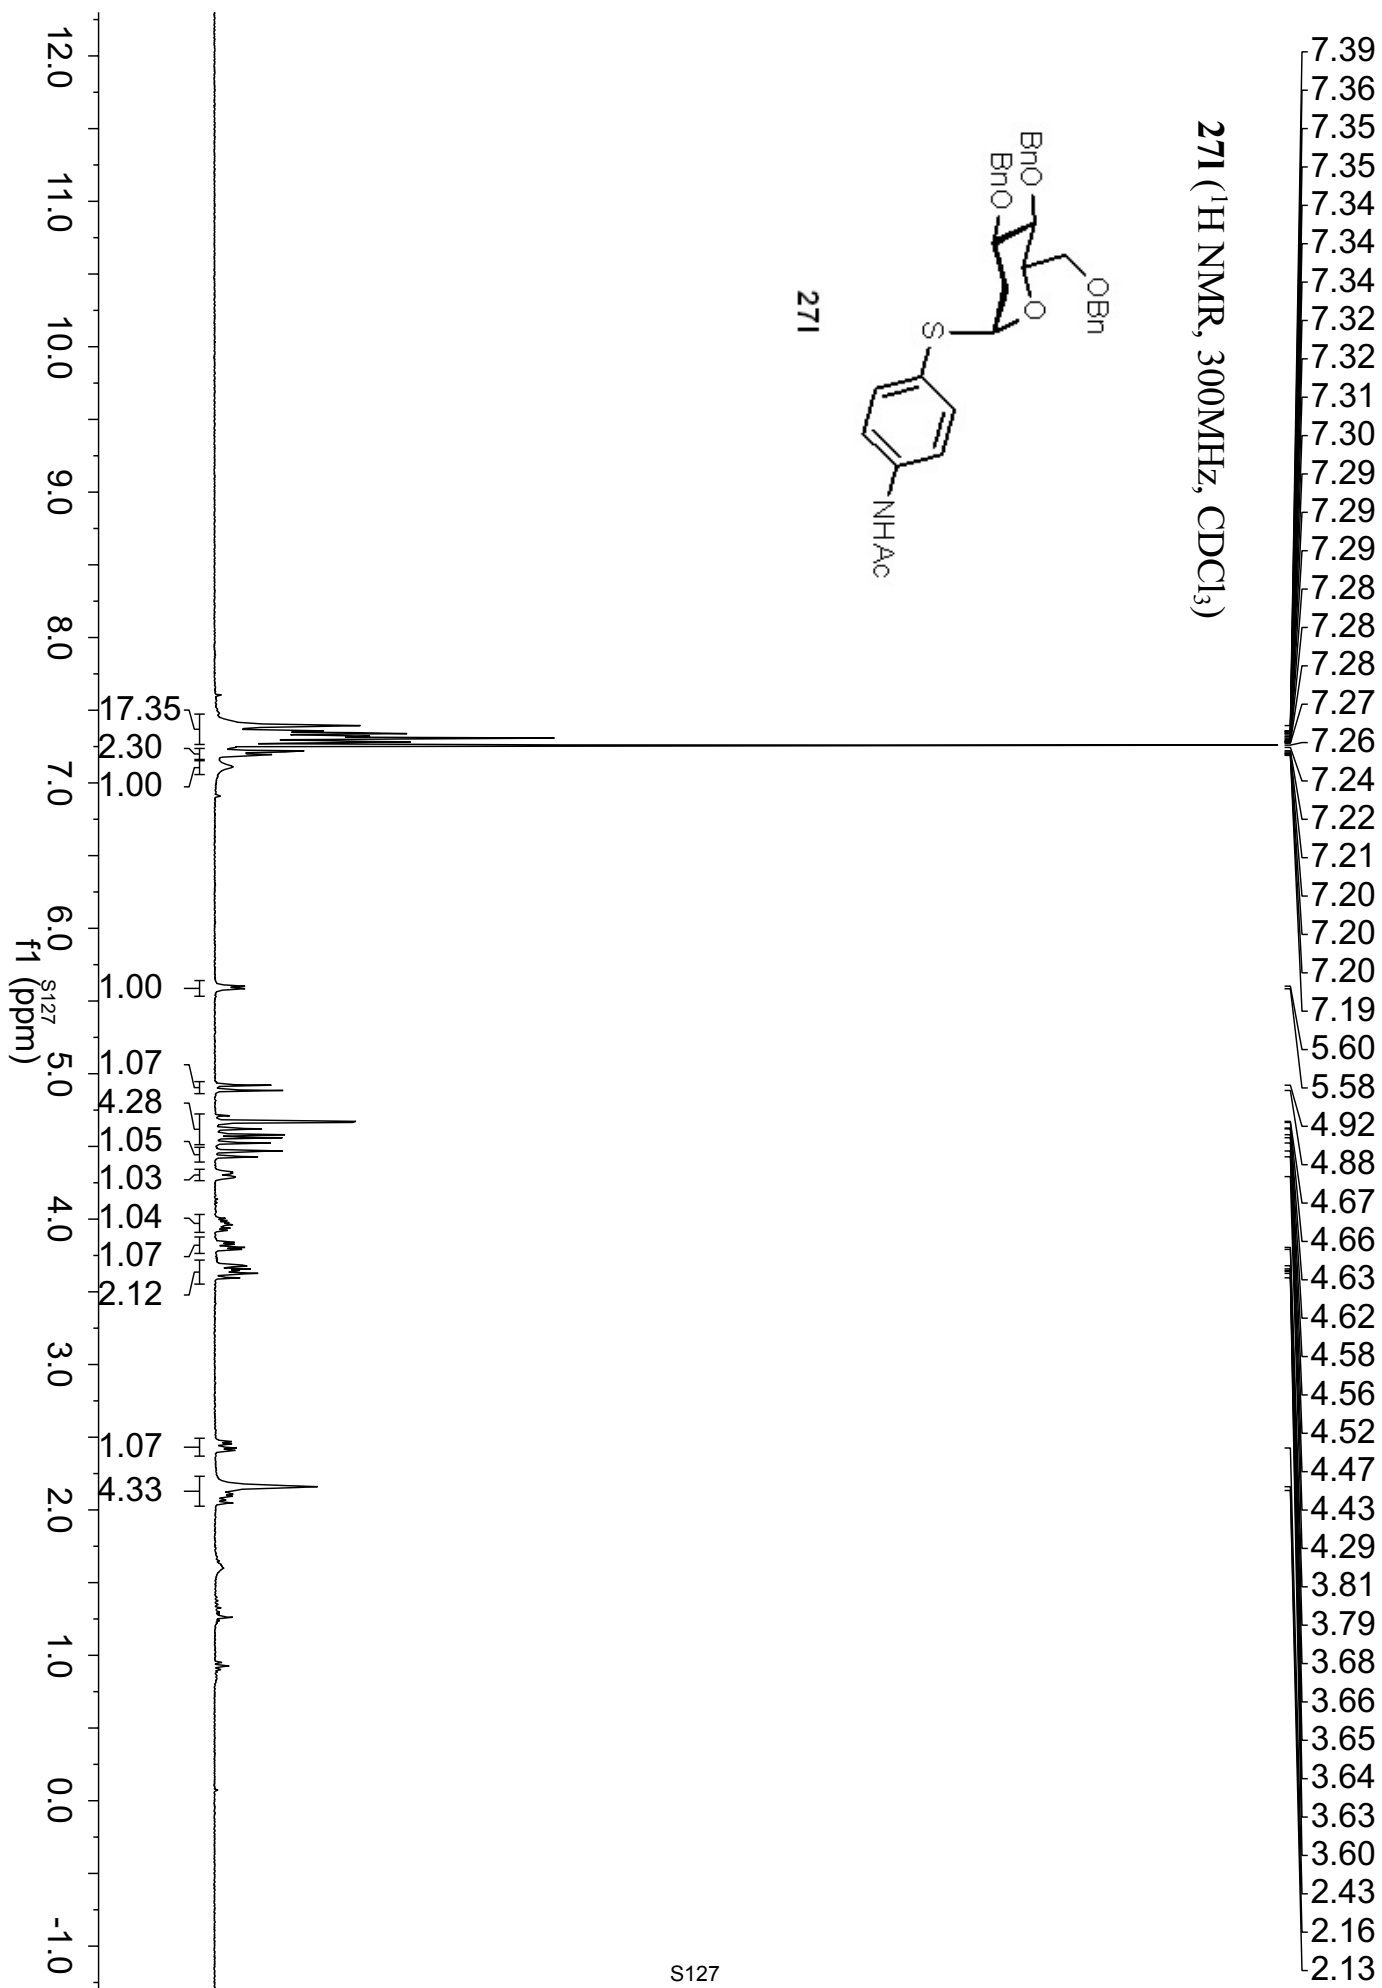

**271** (<sup>13</sup>C NMR, 75MHz, CDCl<sub>3</sub>)

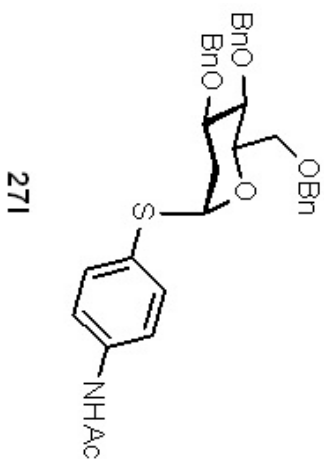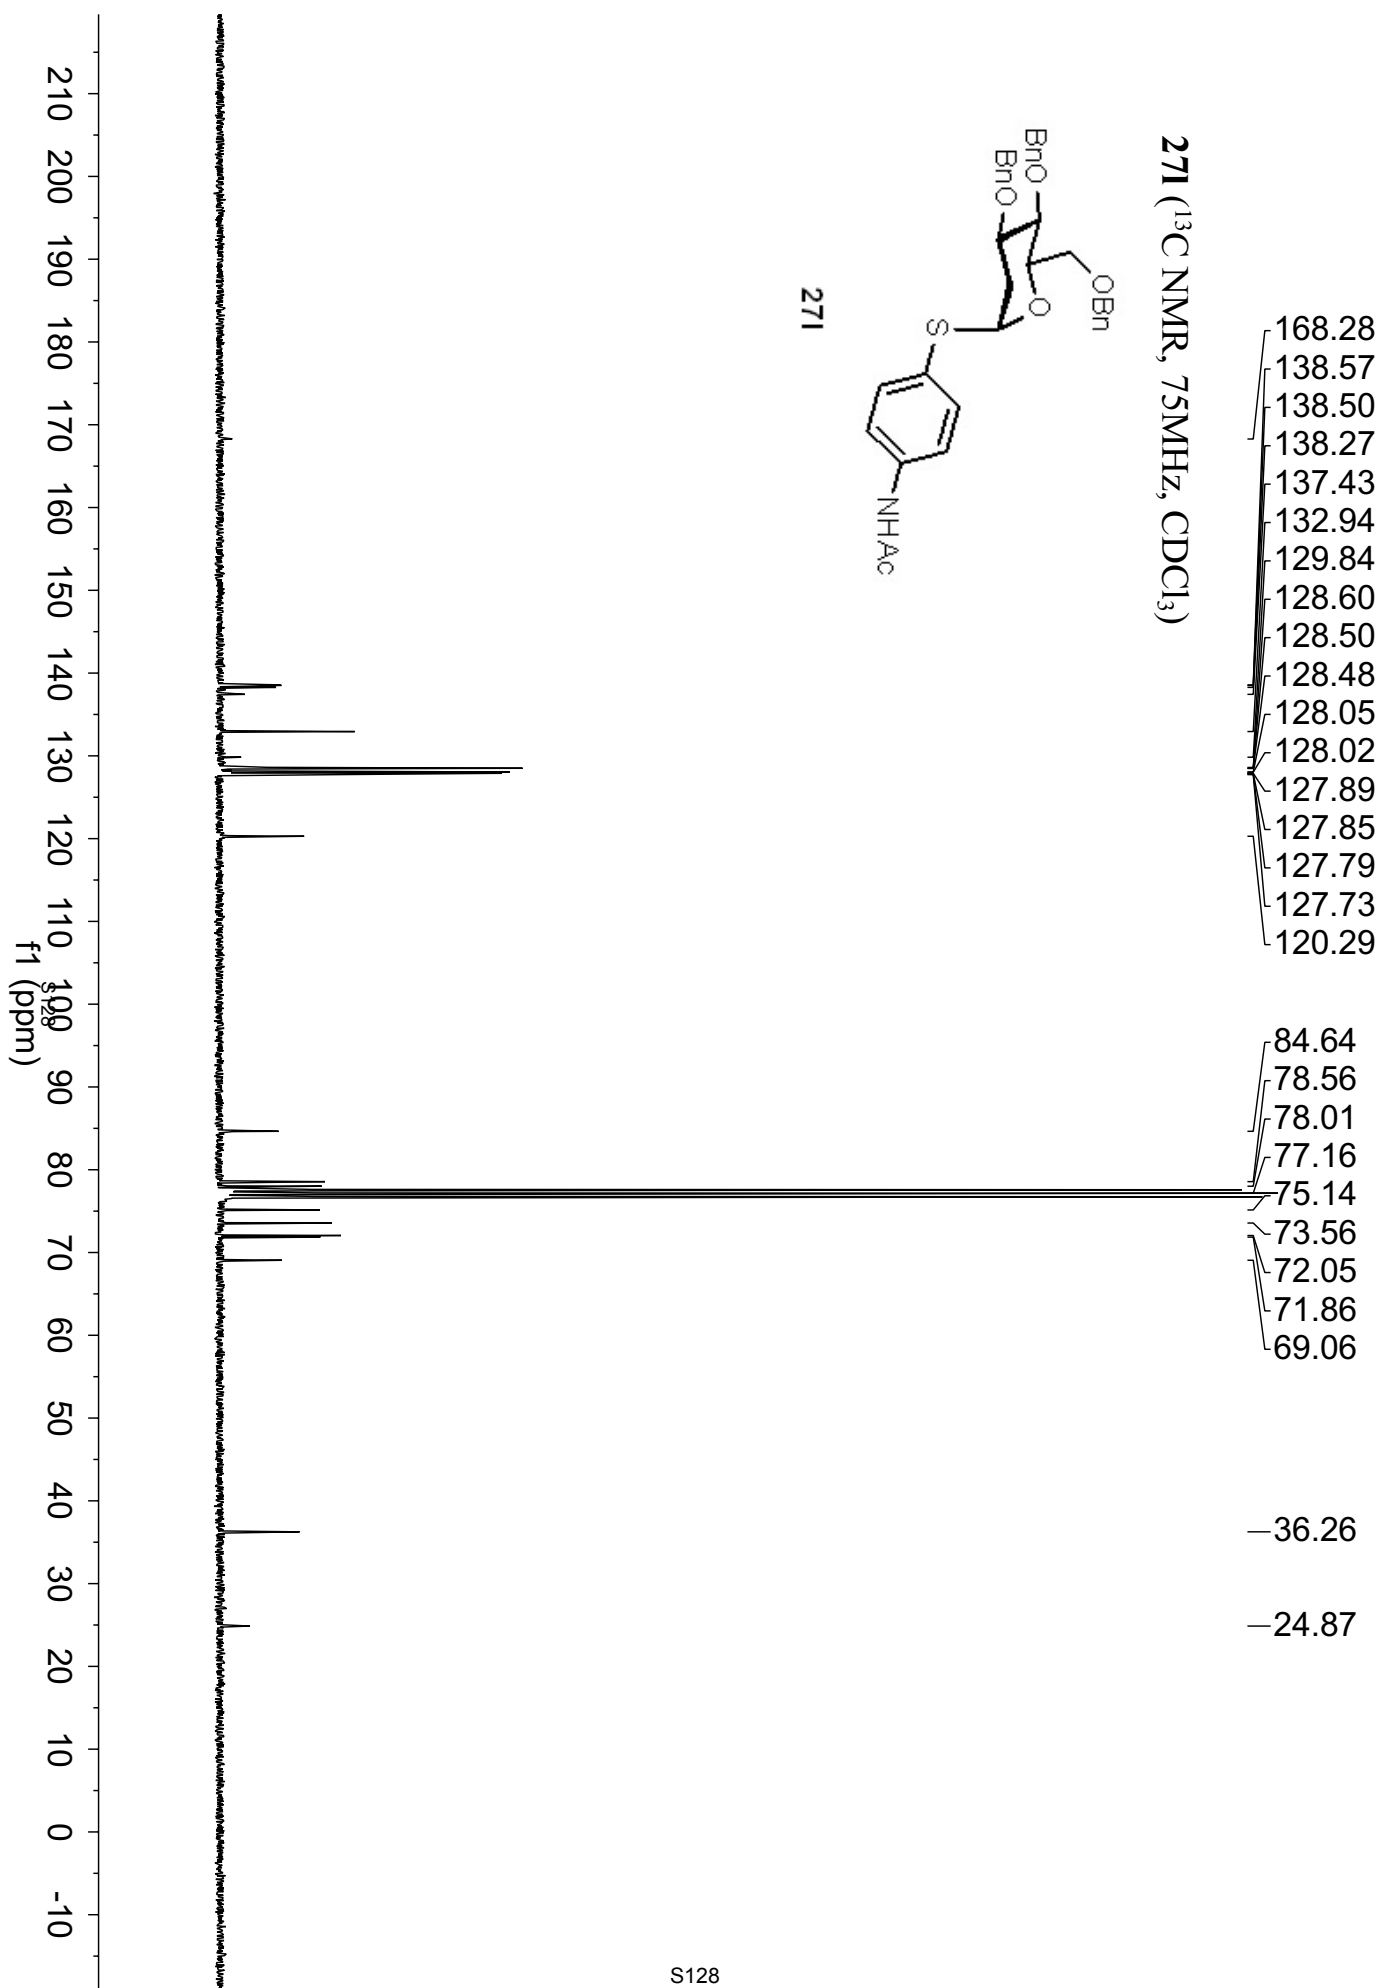



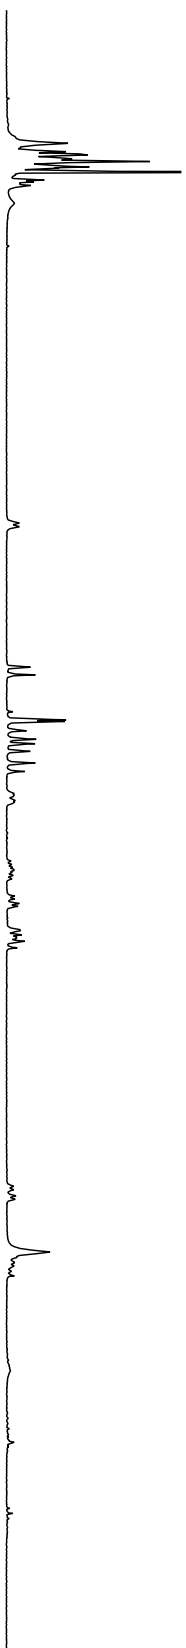

**271** (<sup>1</sup>H-<sup>13</sup>C Coupled HSQC)

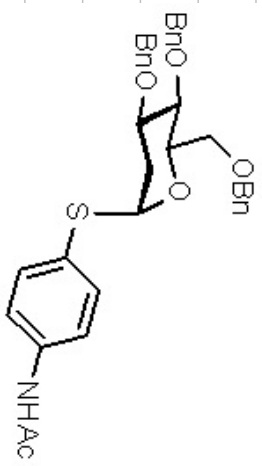

271

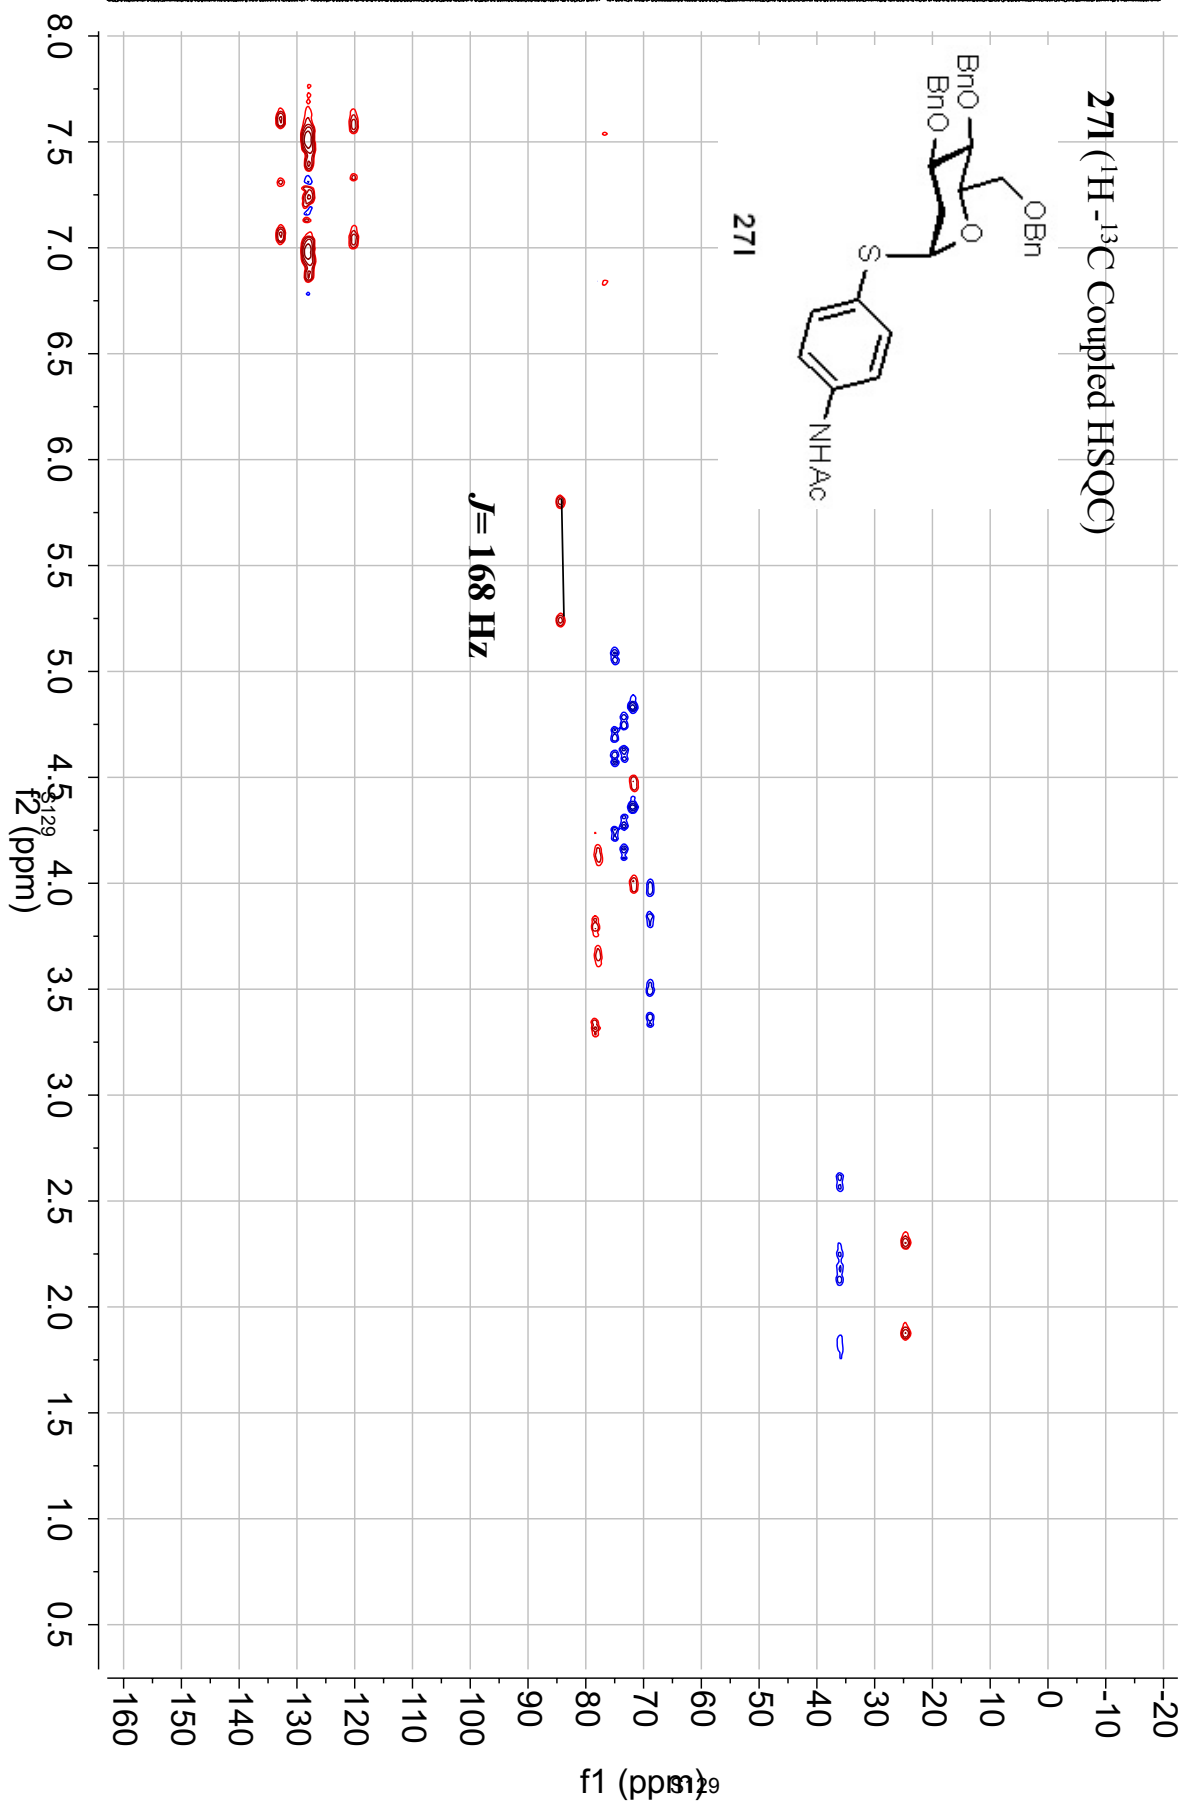



271 ( $^1\text{H}$ - $^{13}\text{C}$  HSQC)

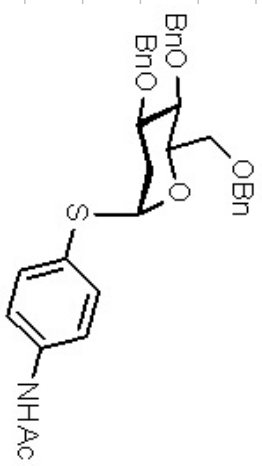

271

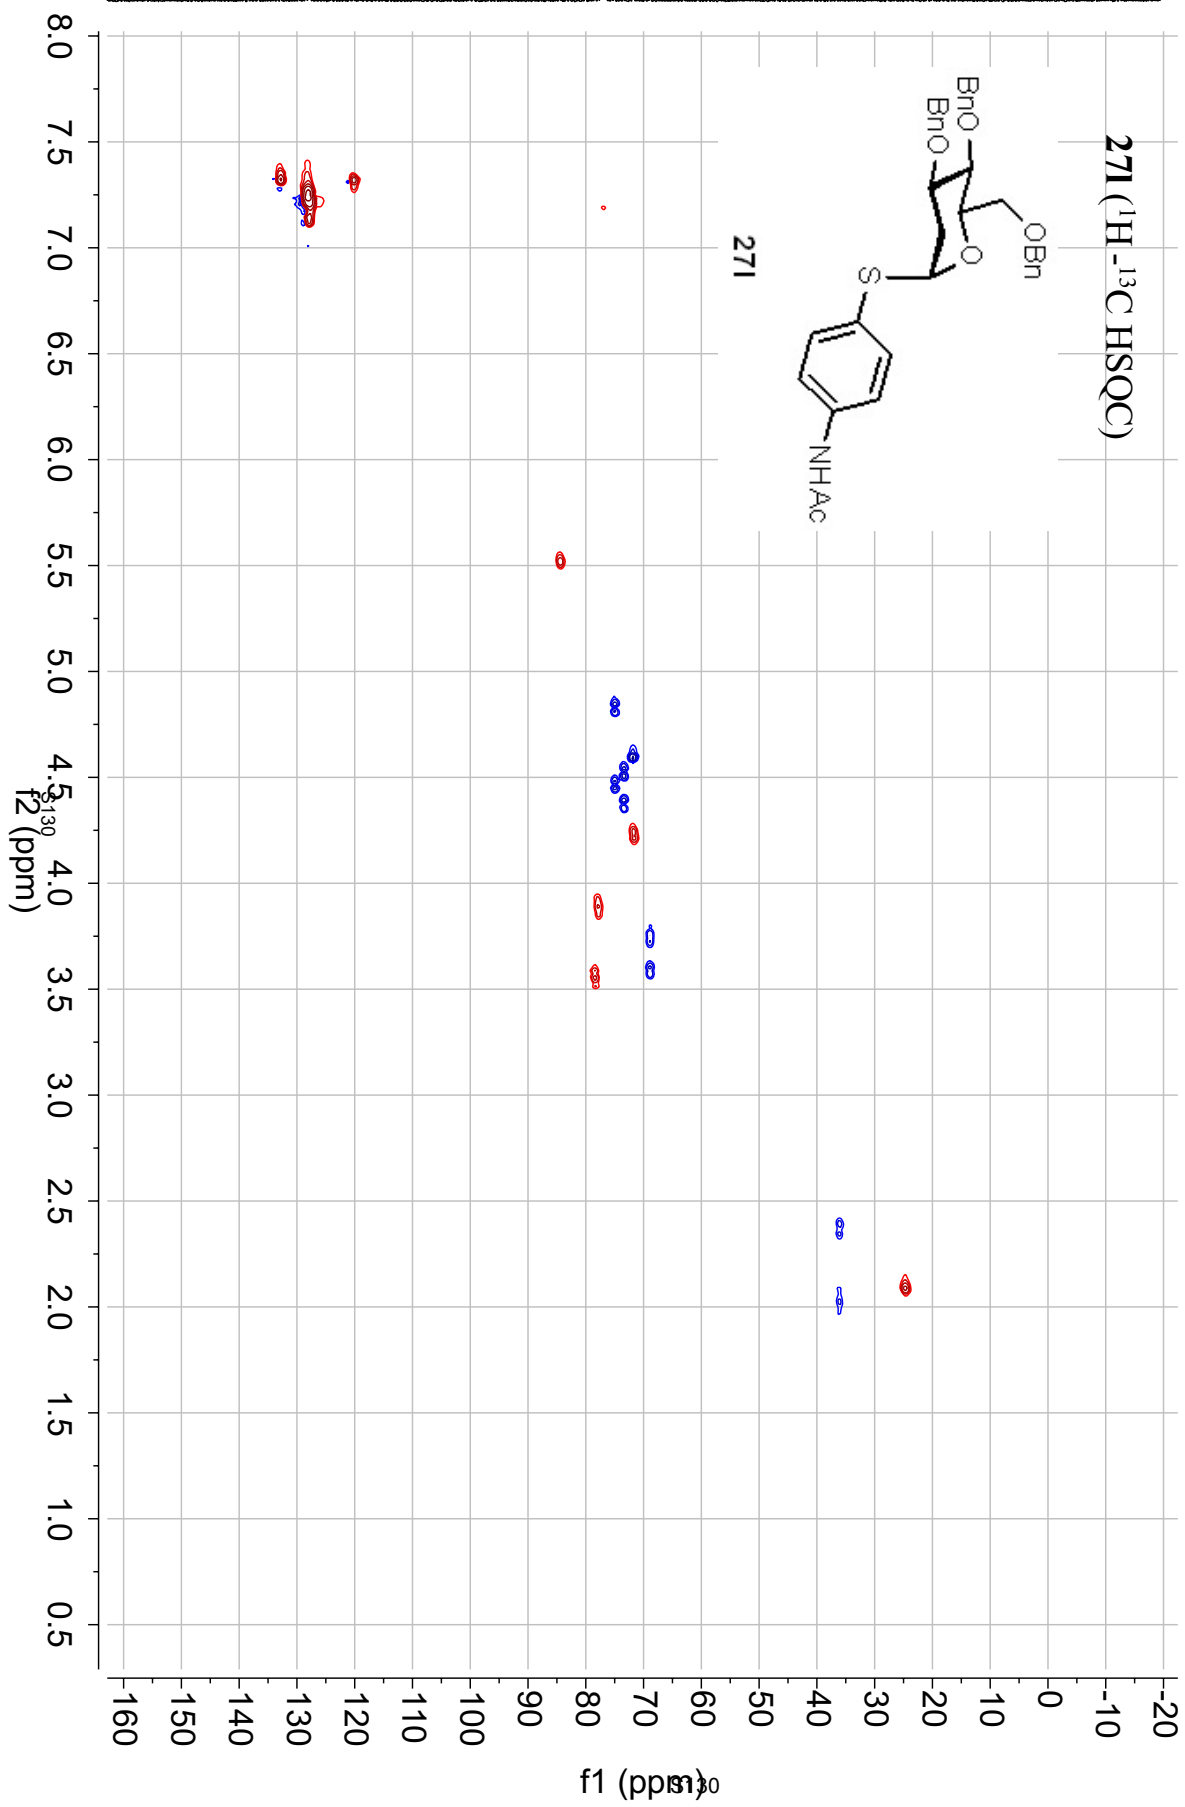

27m (<sup>1</sup>H NMR, 300MHz, CDCl<sub>3</sub>)

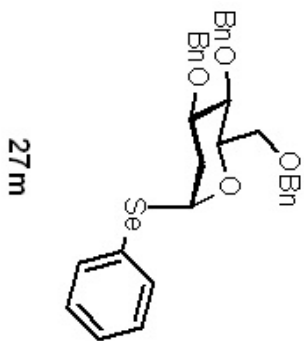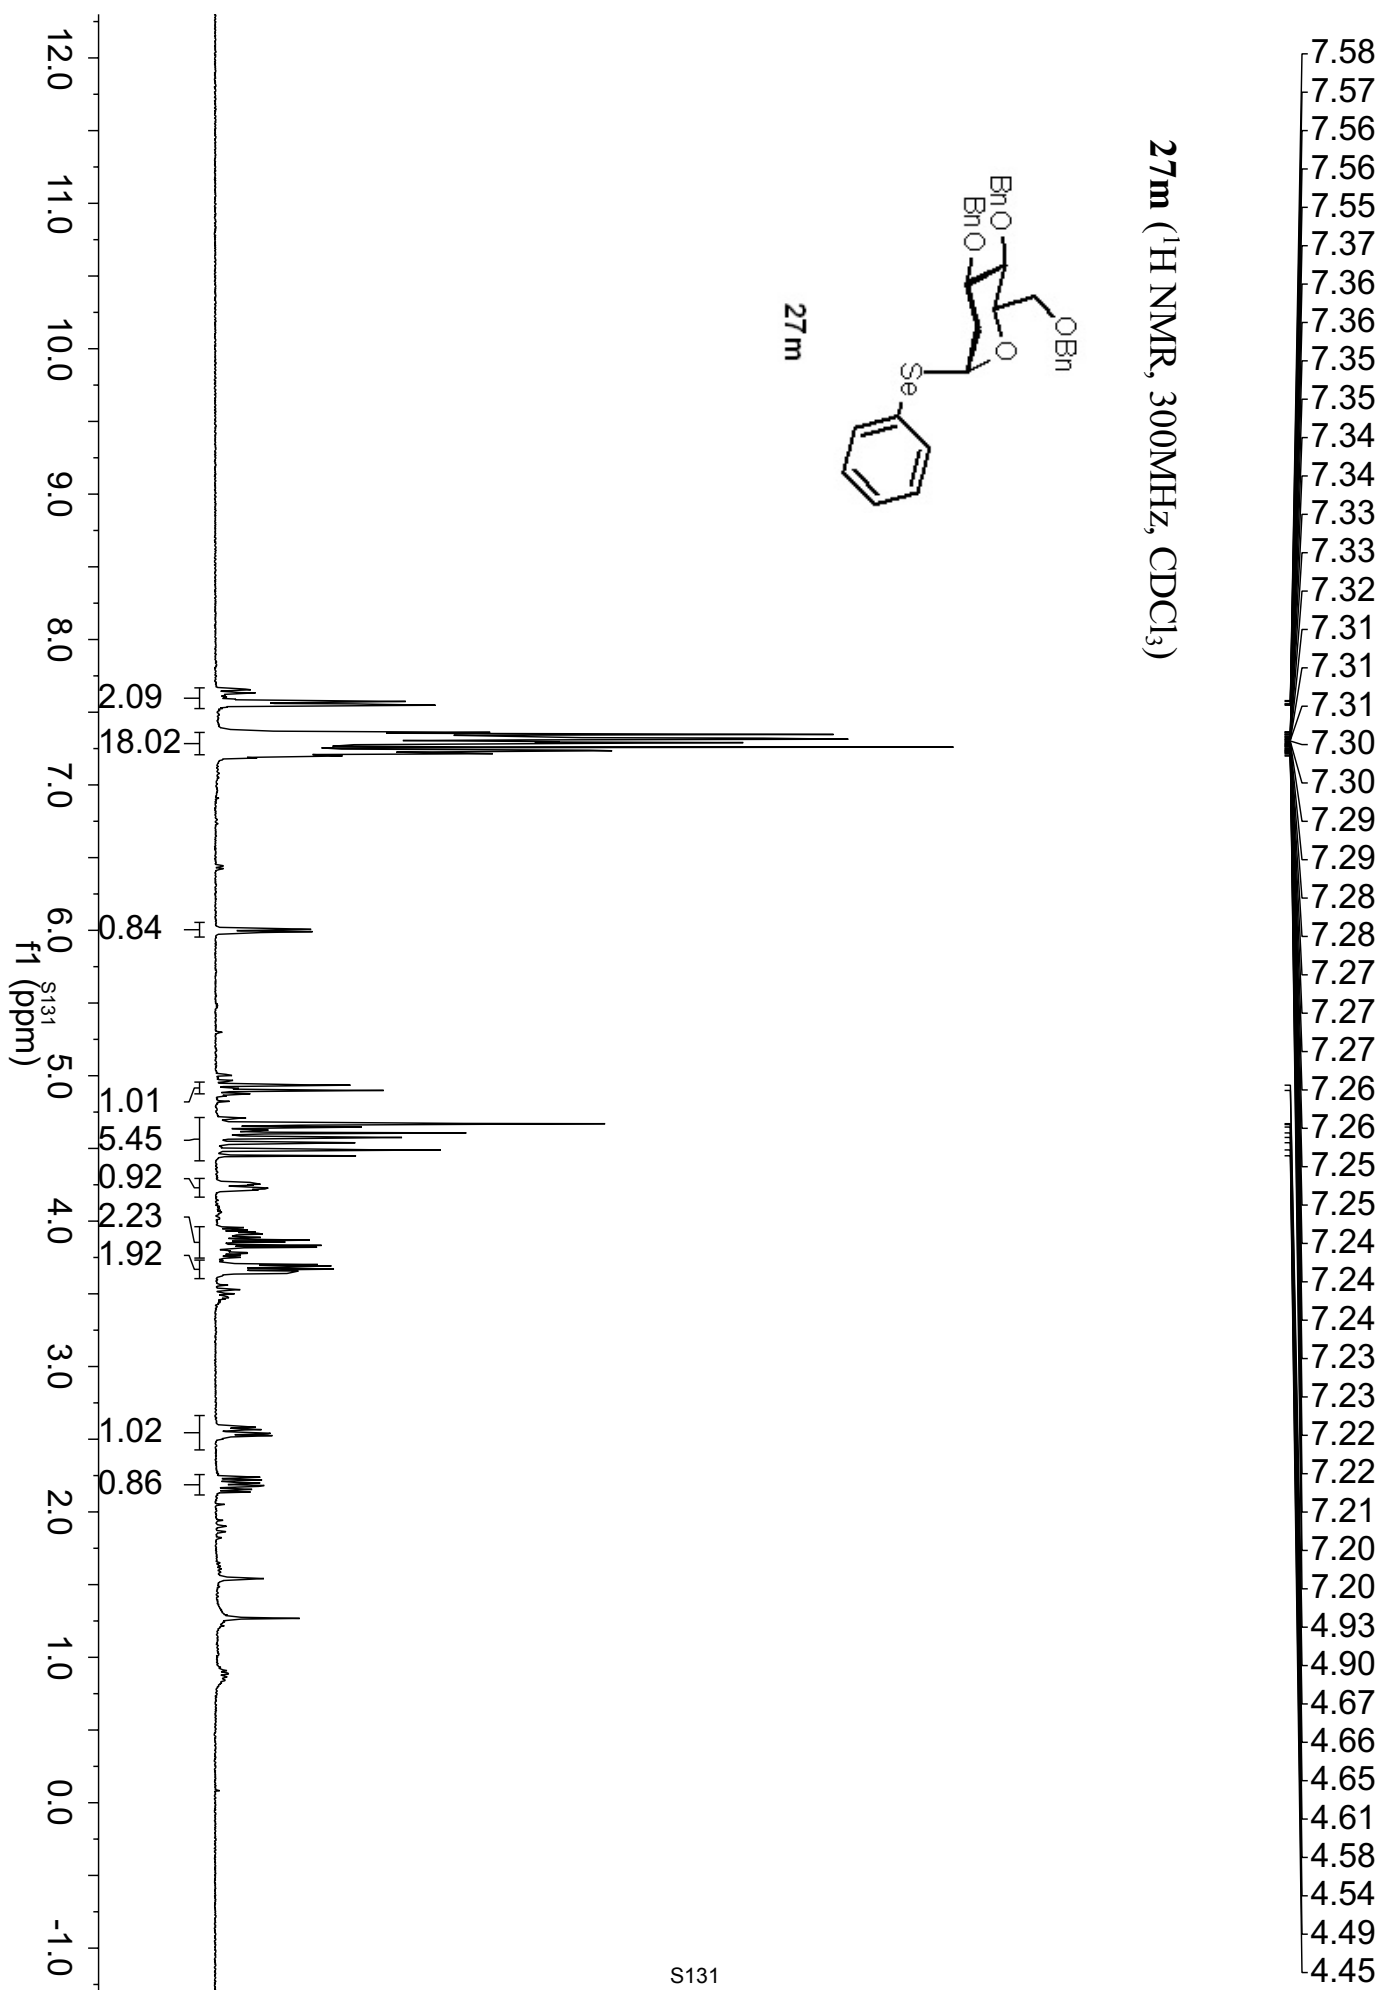

**27m** ( $^{13}\text{C}$  NMR, 75MHz,  $\text{CDCl}_3$ )

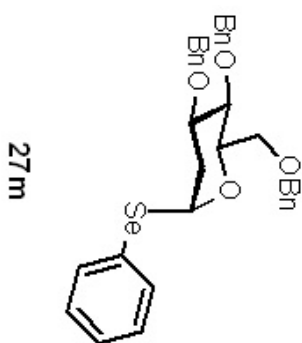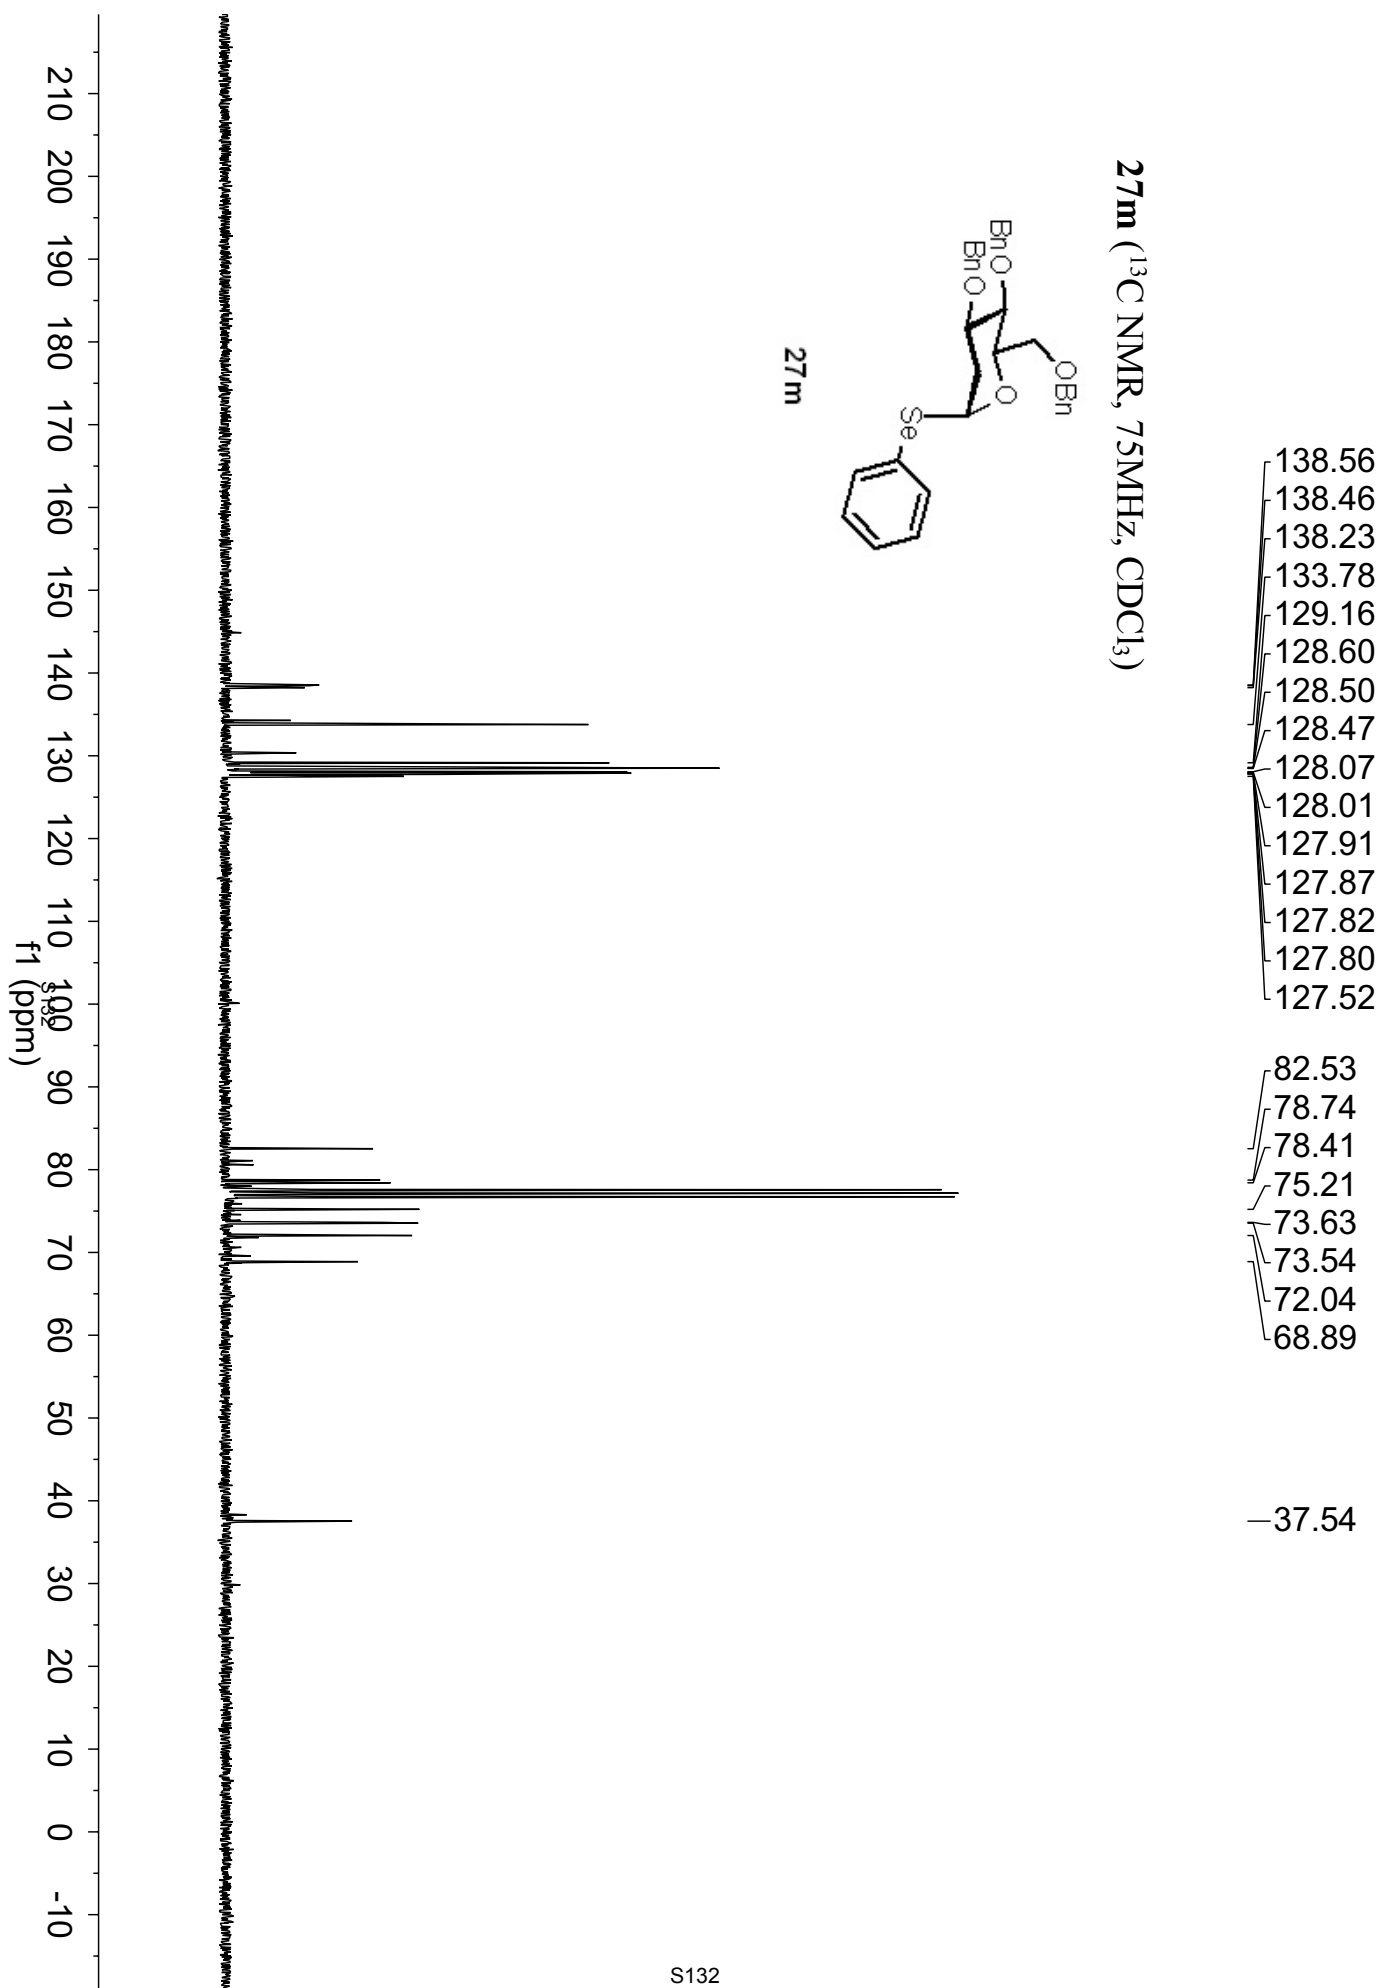

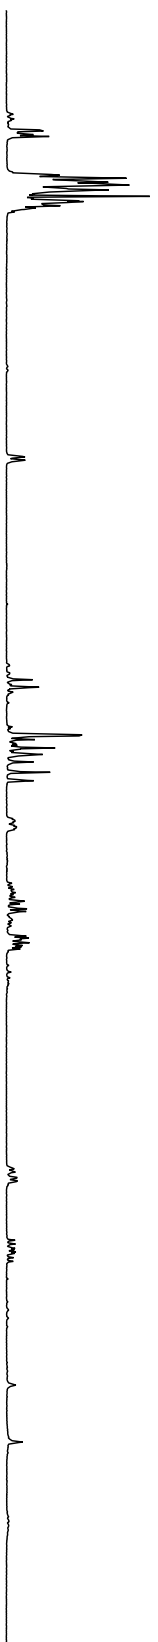

**27m (<sup>1</sup>H-<sup>13</sup>C Coupled HSQC)**

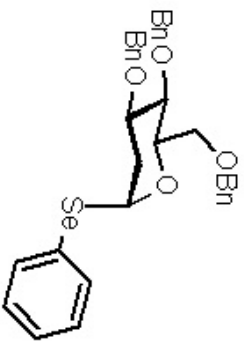

27m

$J = 170$  Hz

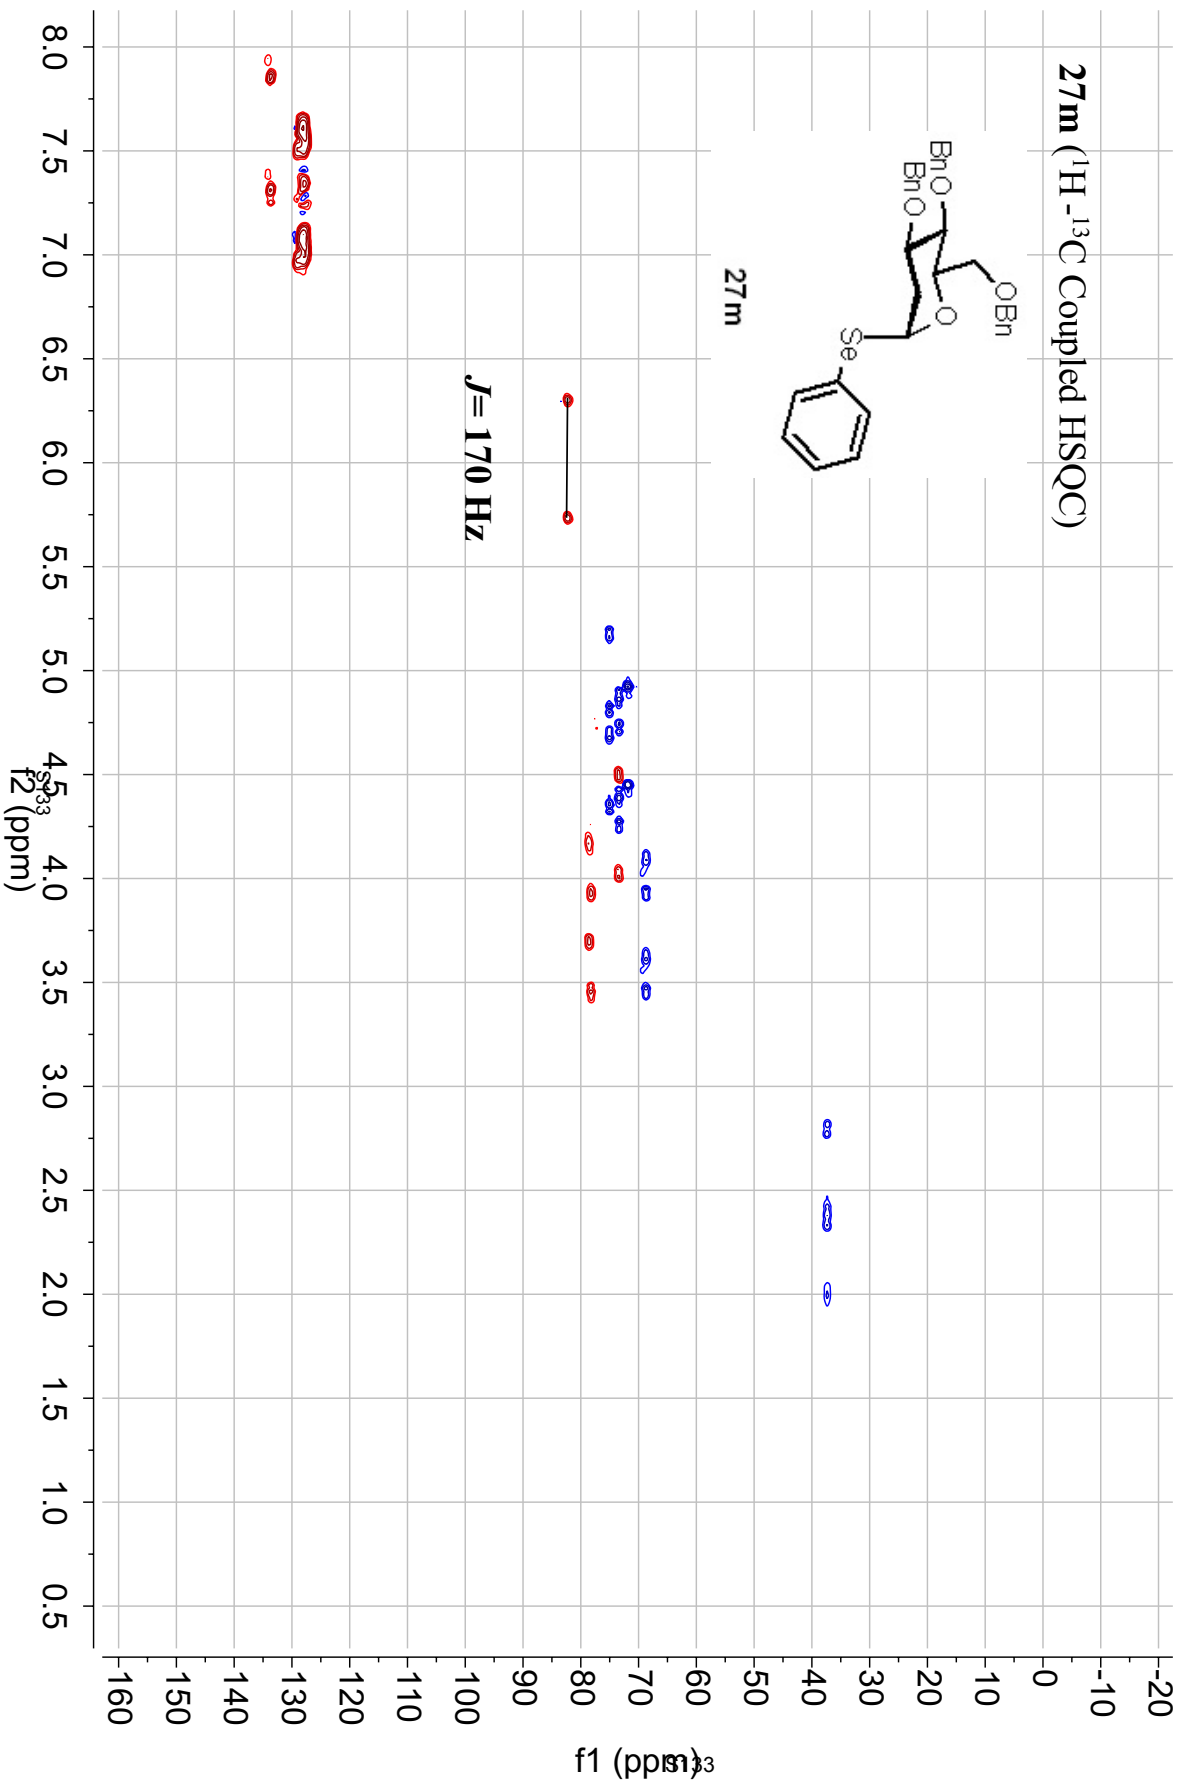

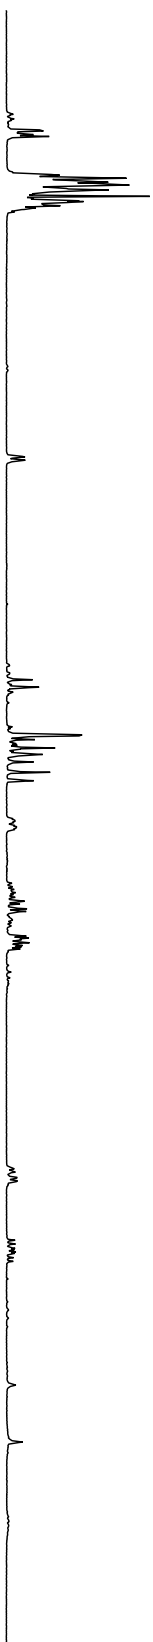

**27m** ( $^1\text{H}$ - $^{13}\text{C}$  HSQC)

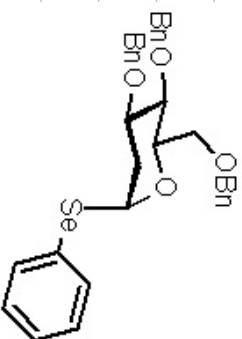

27m

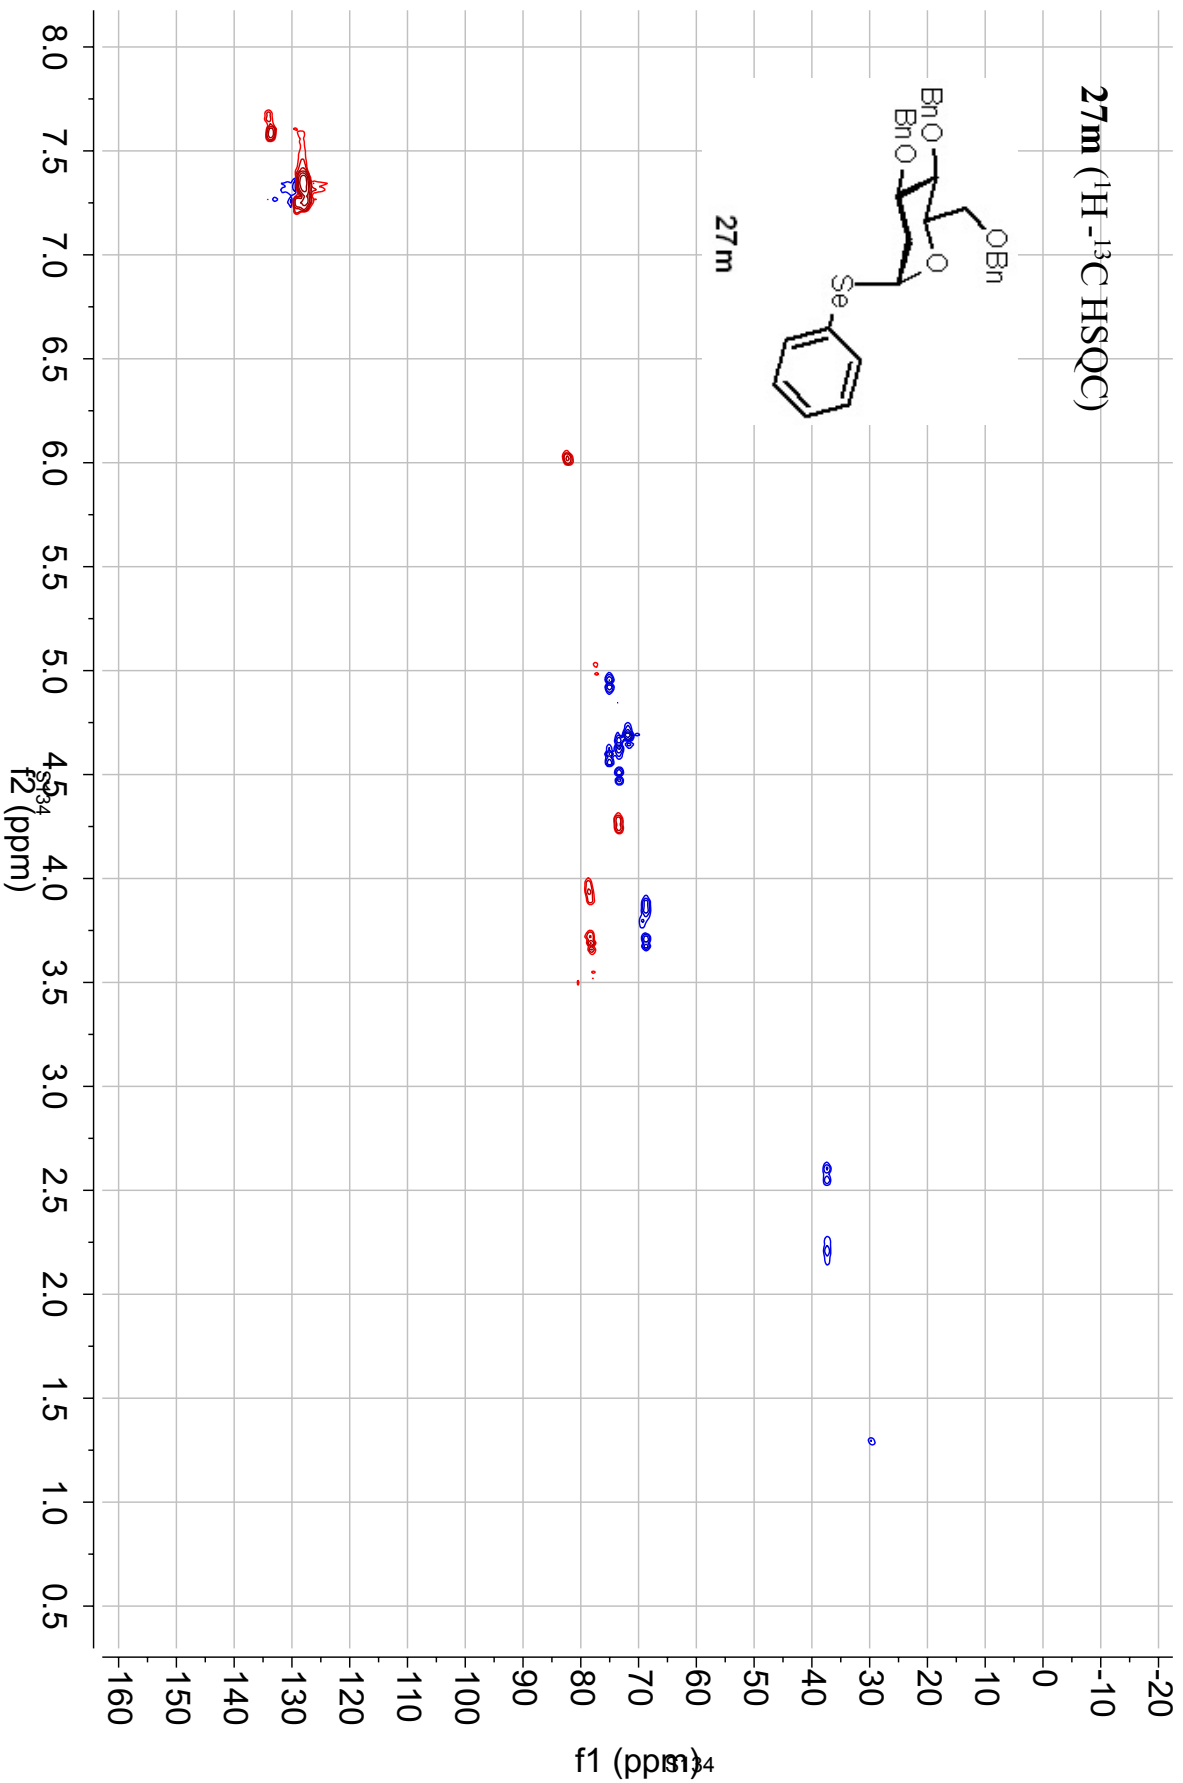

27n (<sup>1</sup>H NMR, 300MHz, CDCl<sub>3</sub>)

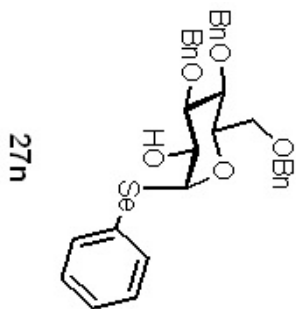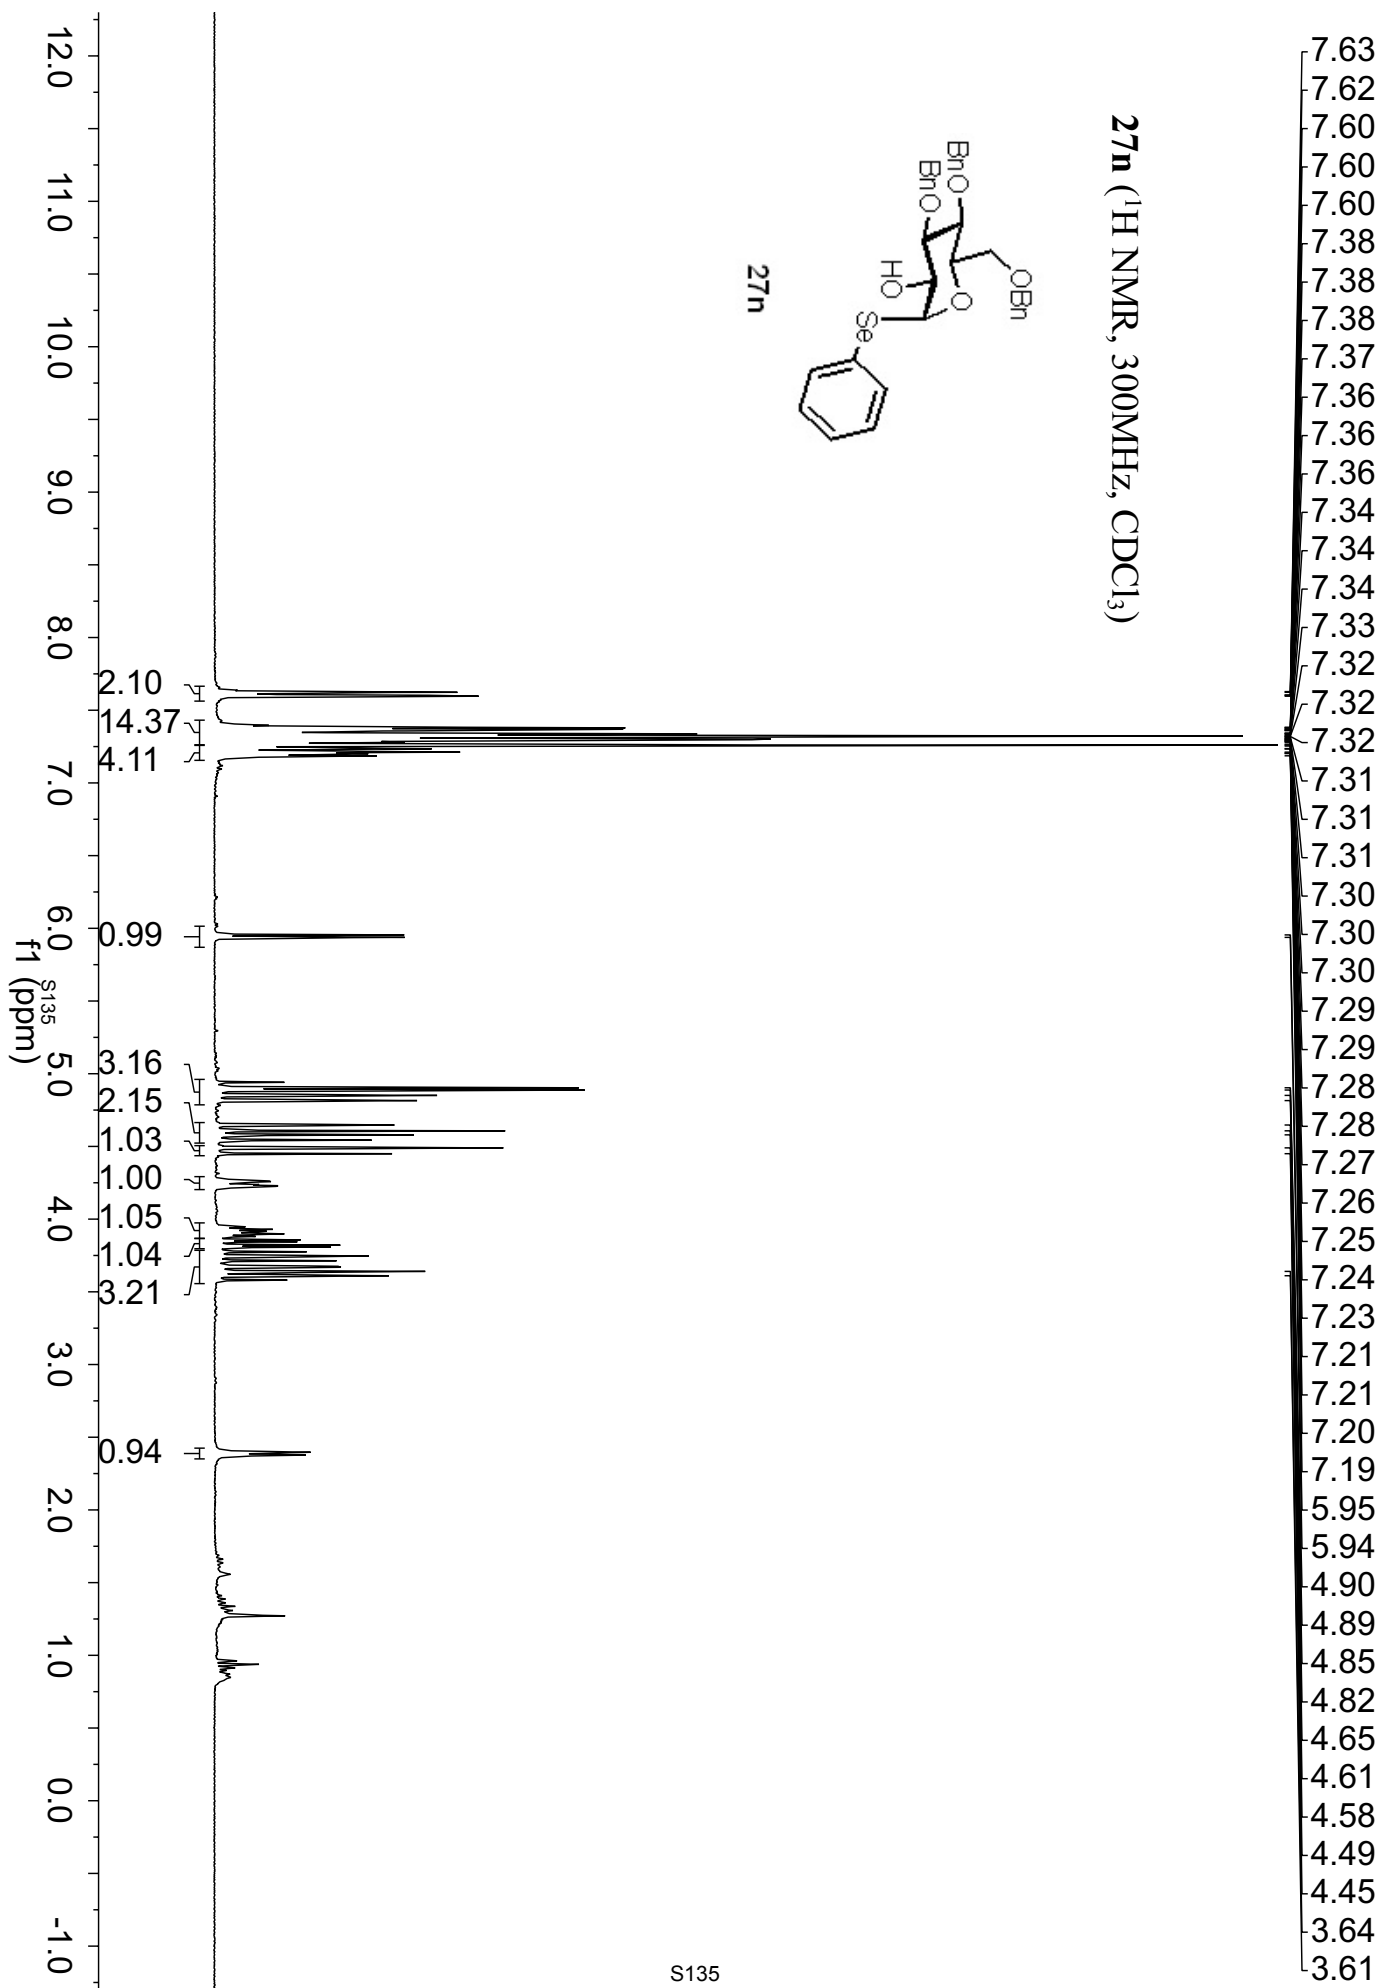

**27n** (<sup>13</sup>C NMR, 75MHz, CDCl<sub>3</sub>)

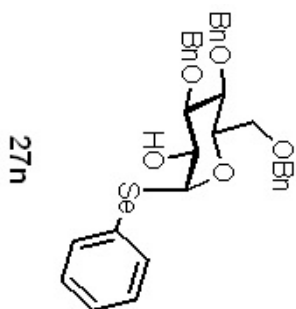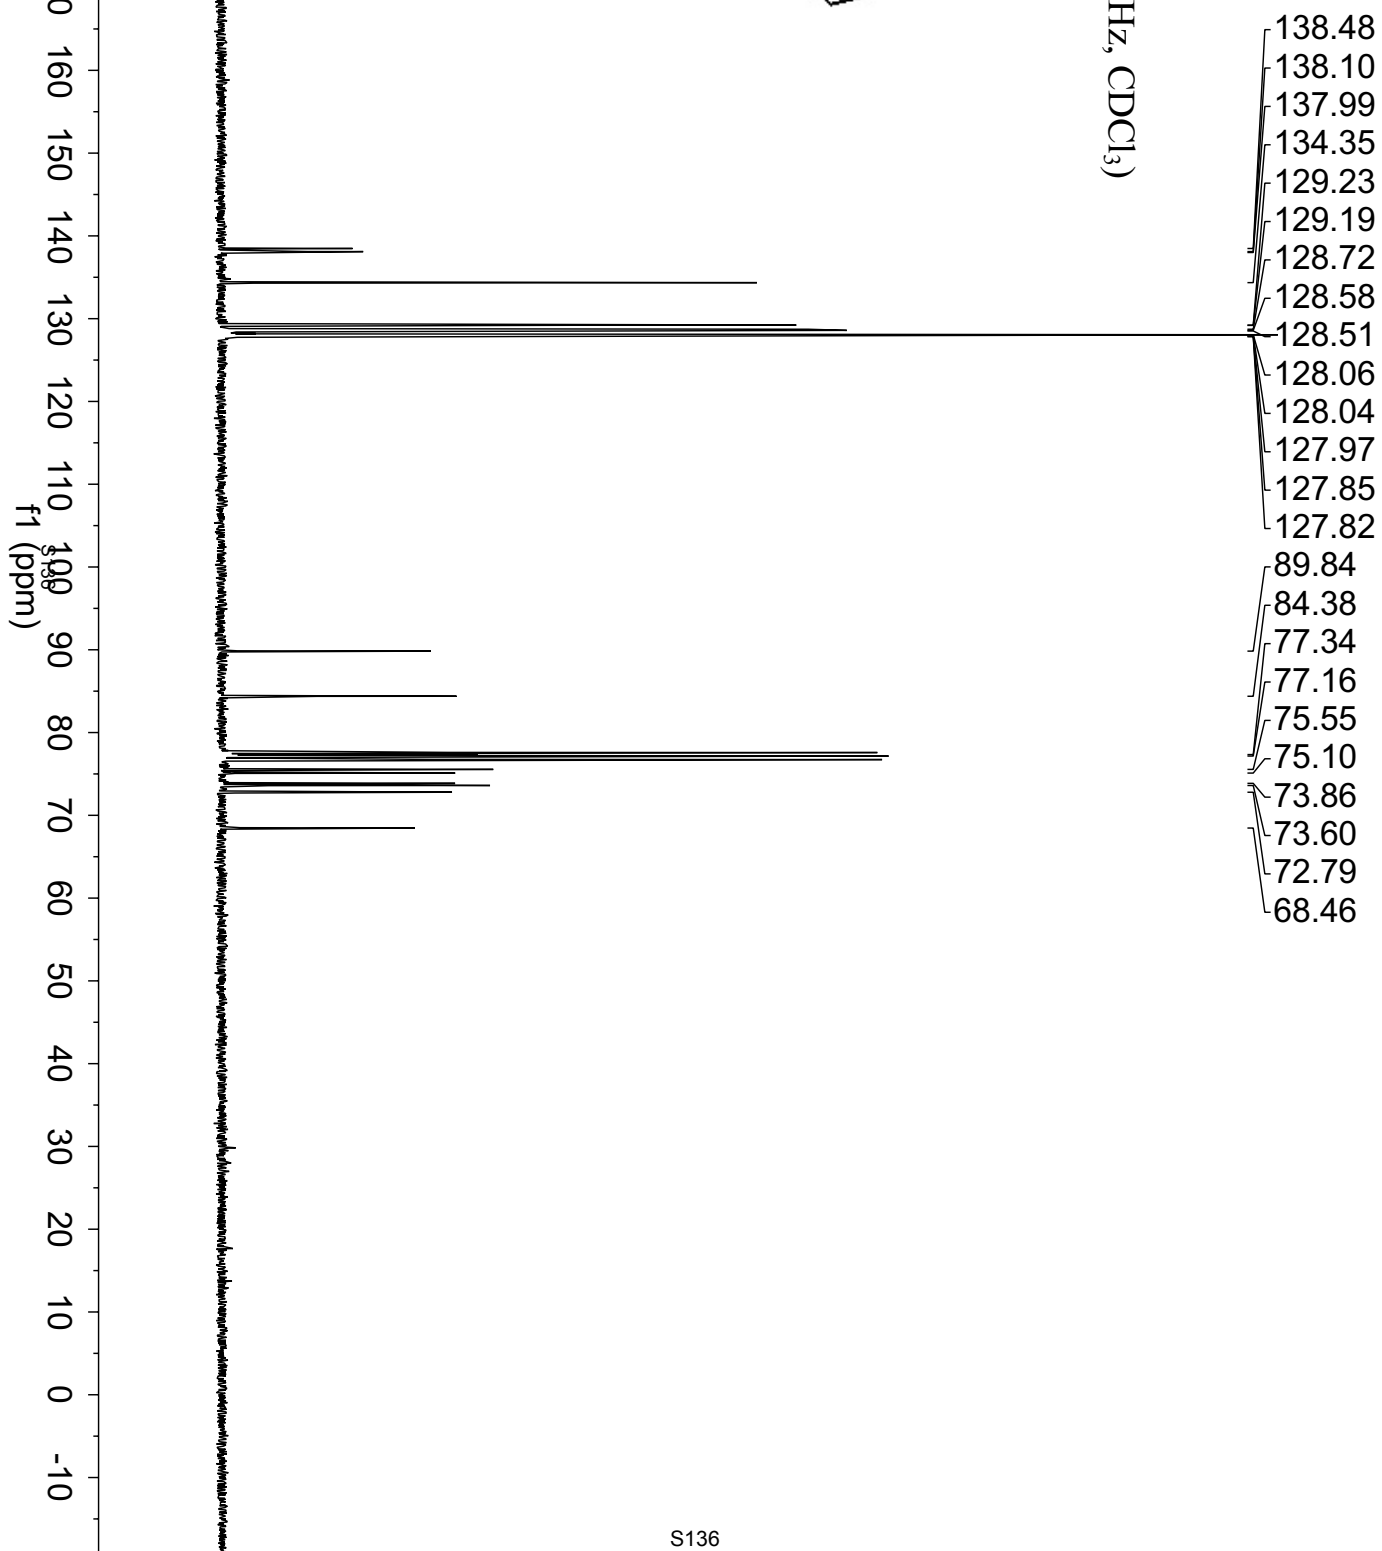



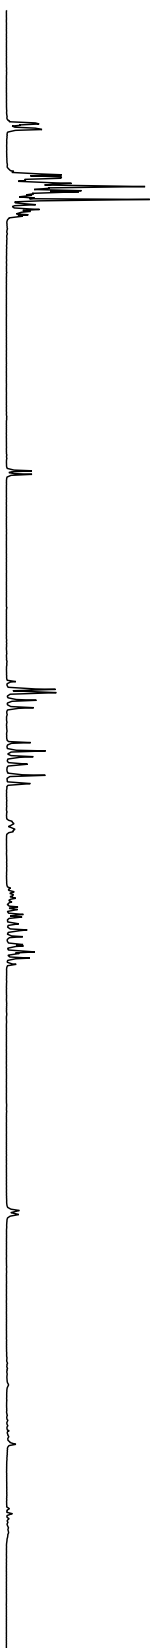

**27n** (<sup>1</sup>H-<sup>13</sup>C Coupled HSQC)

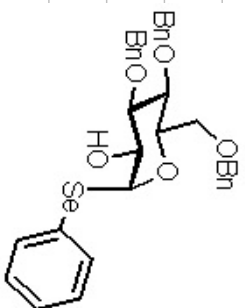

27n

$J = 168 \text{ Hz}$

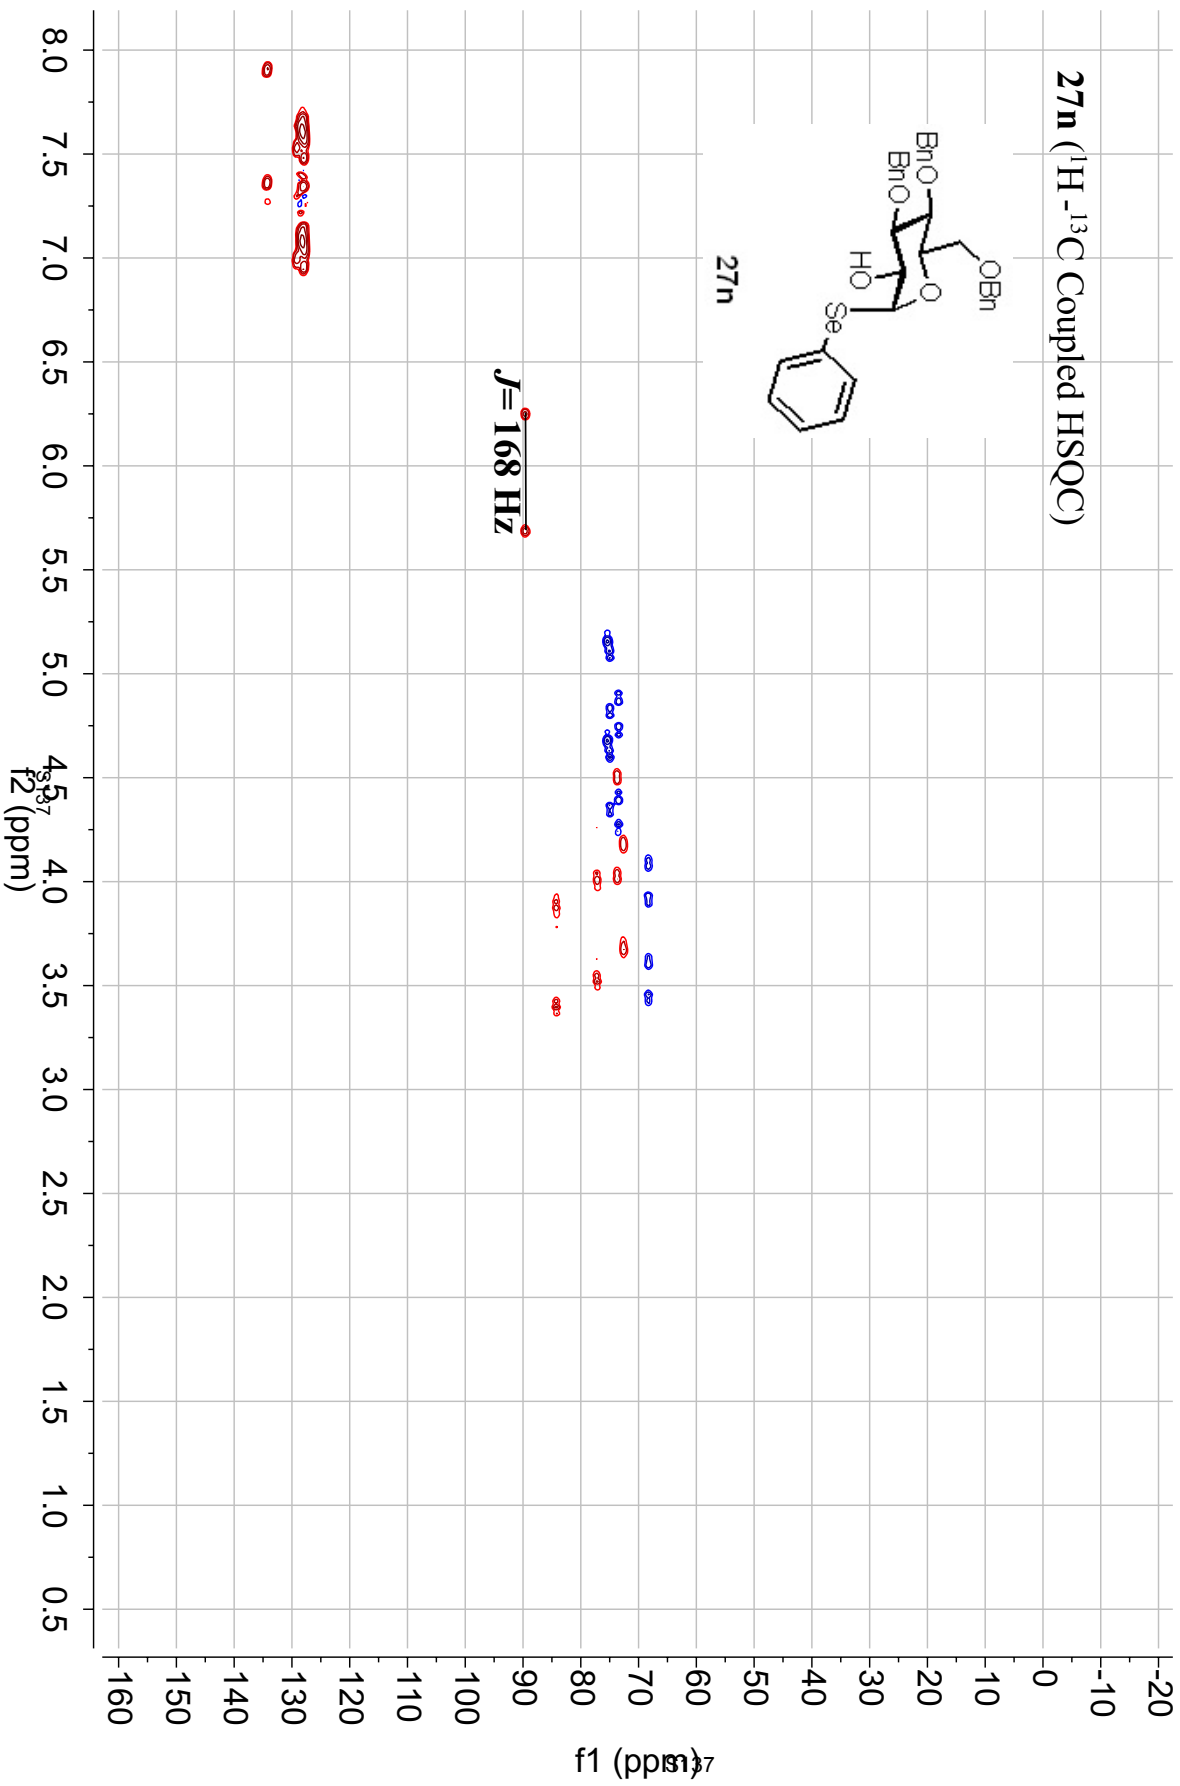

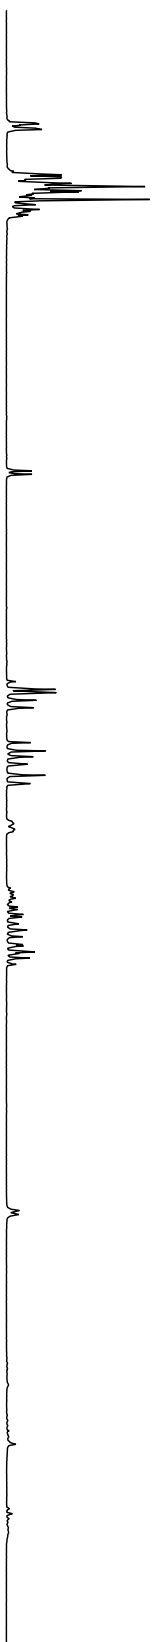

**27n** ( $^1\text{H}$ - $^{13}\text{C}$  HSQC)

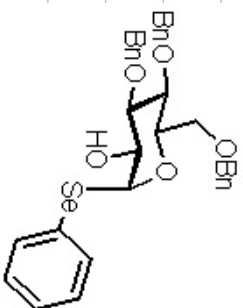

27n

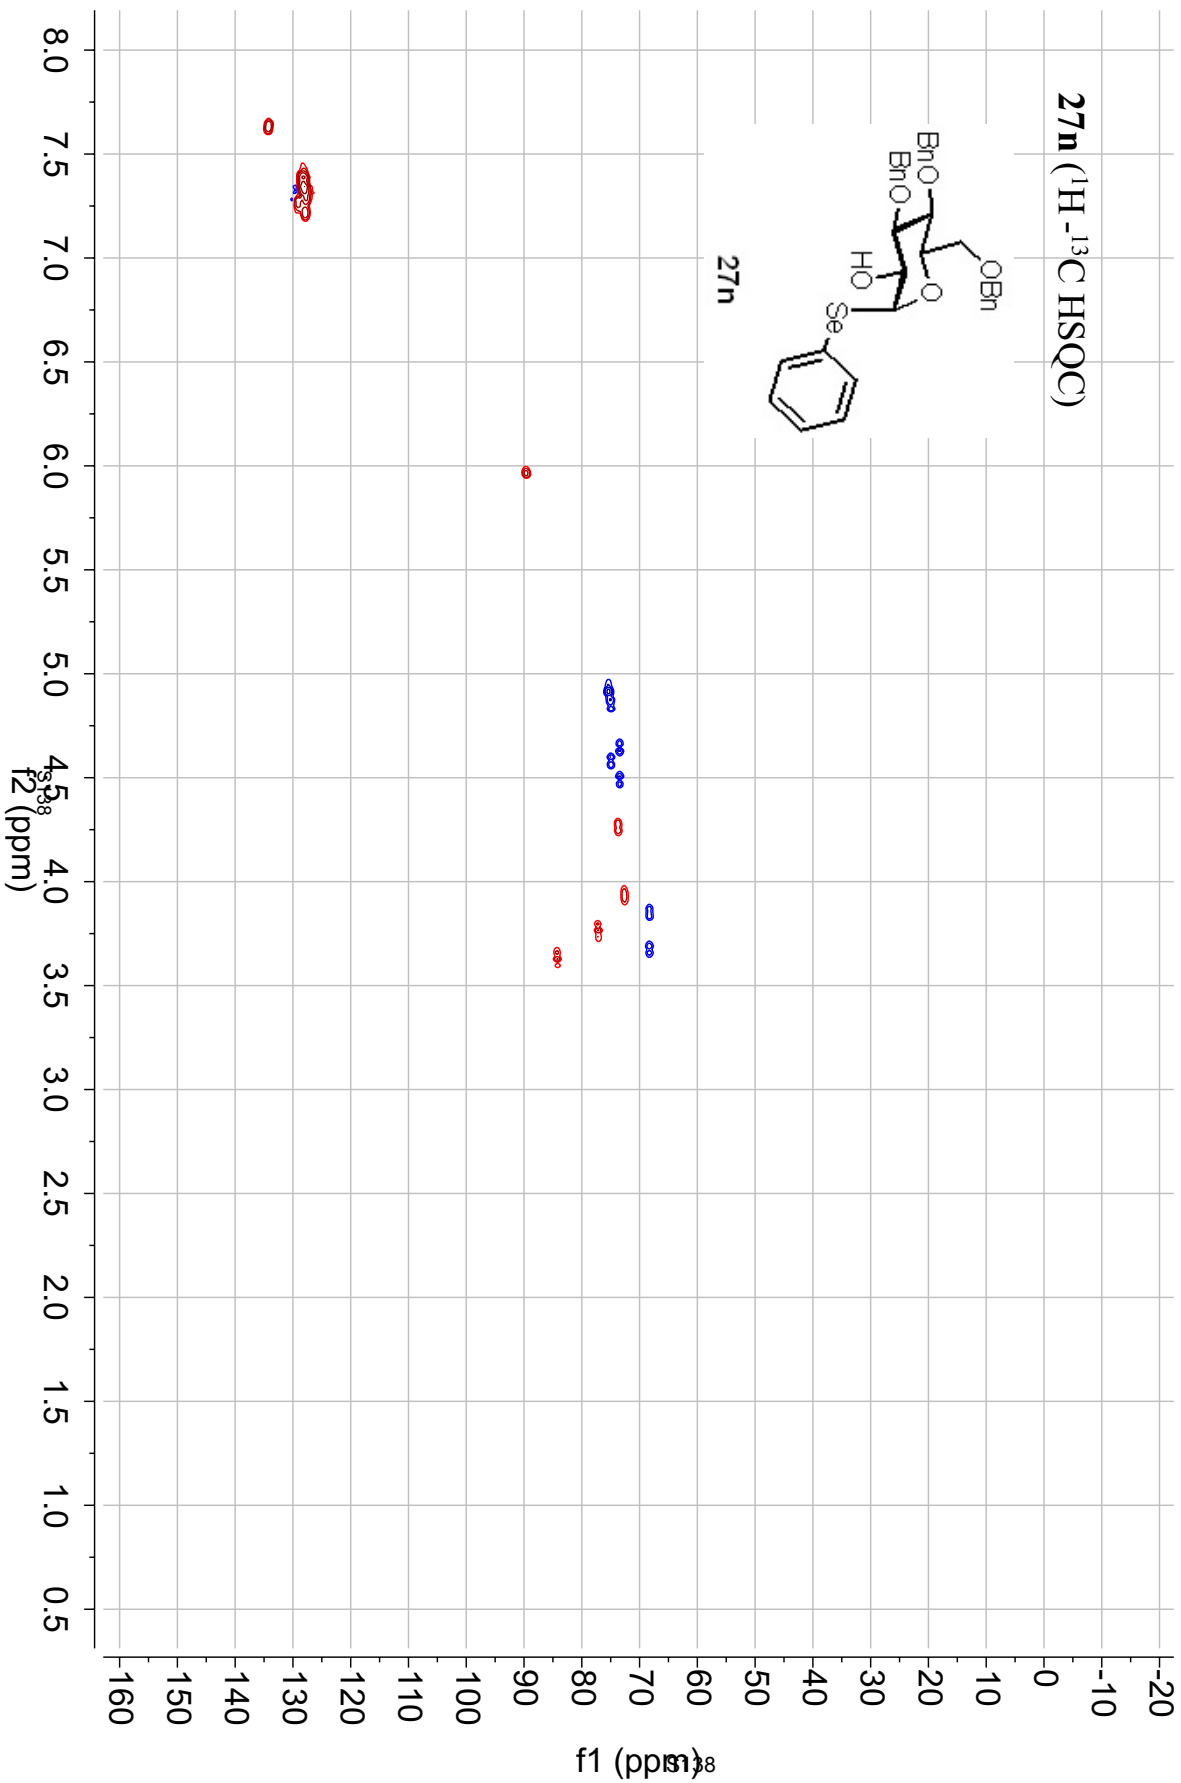

46a (<sup>1</sup>H NMR, 300MHz, CDCl<sub>3</sub>)

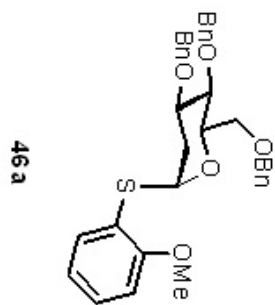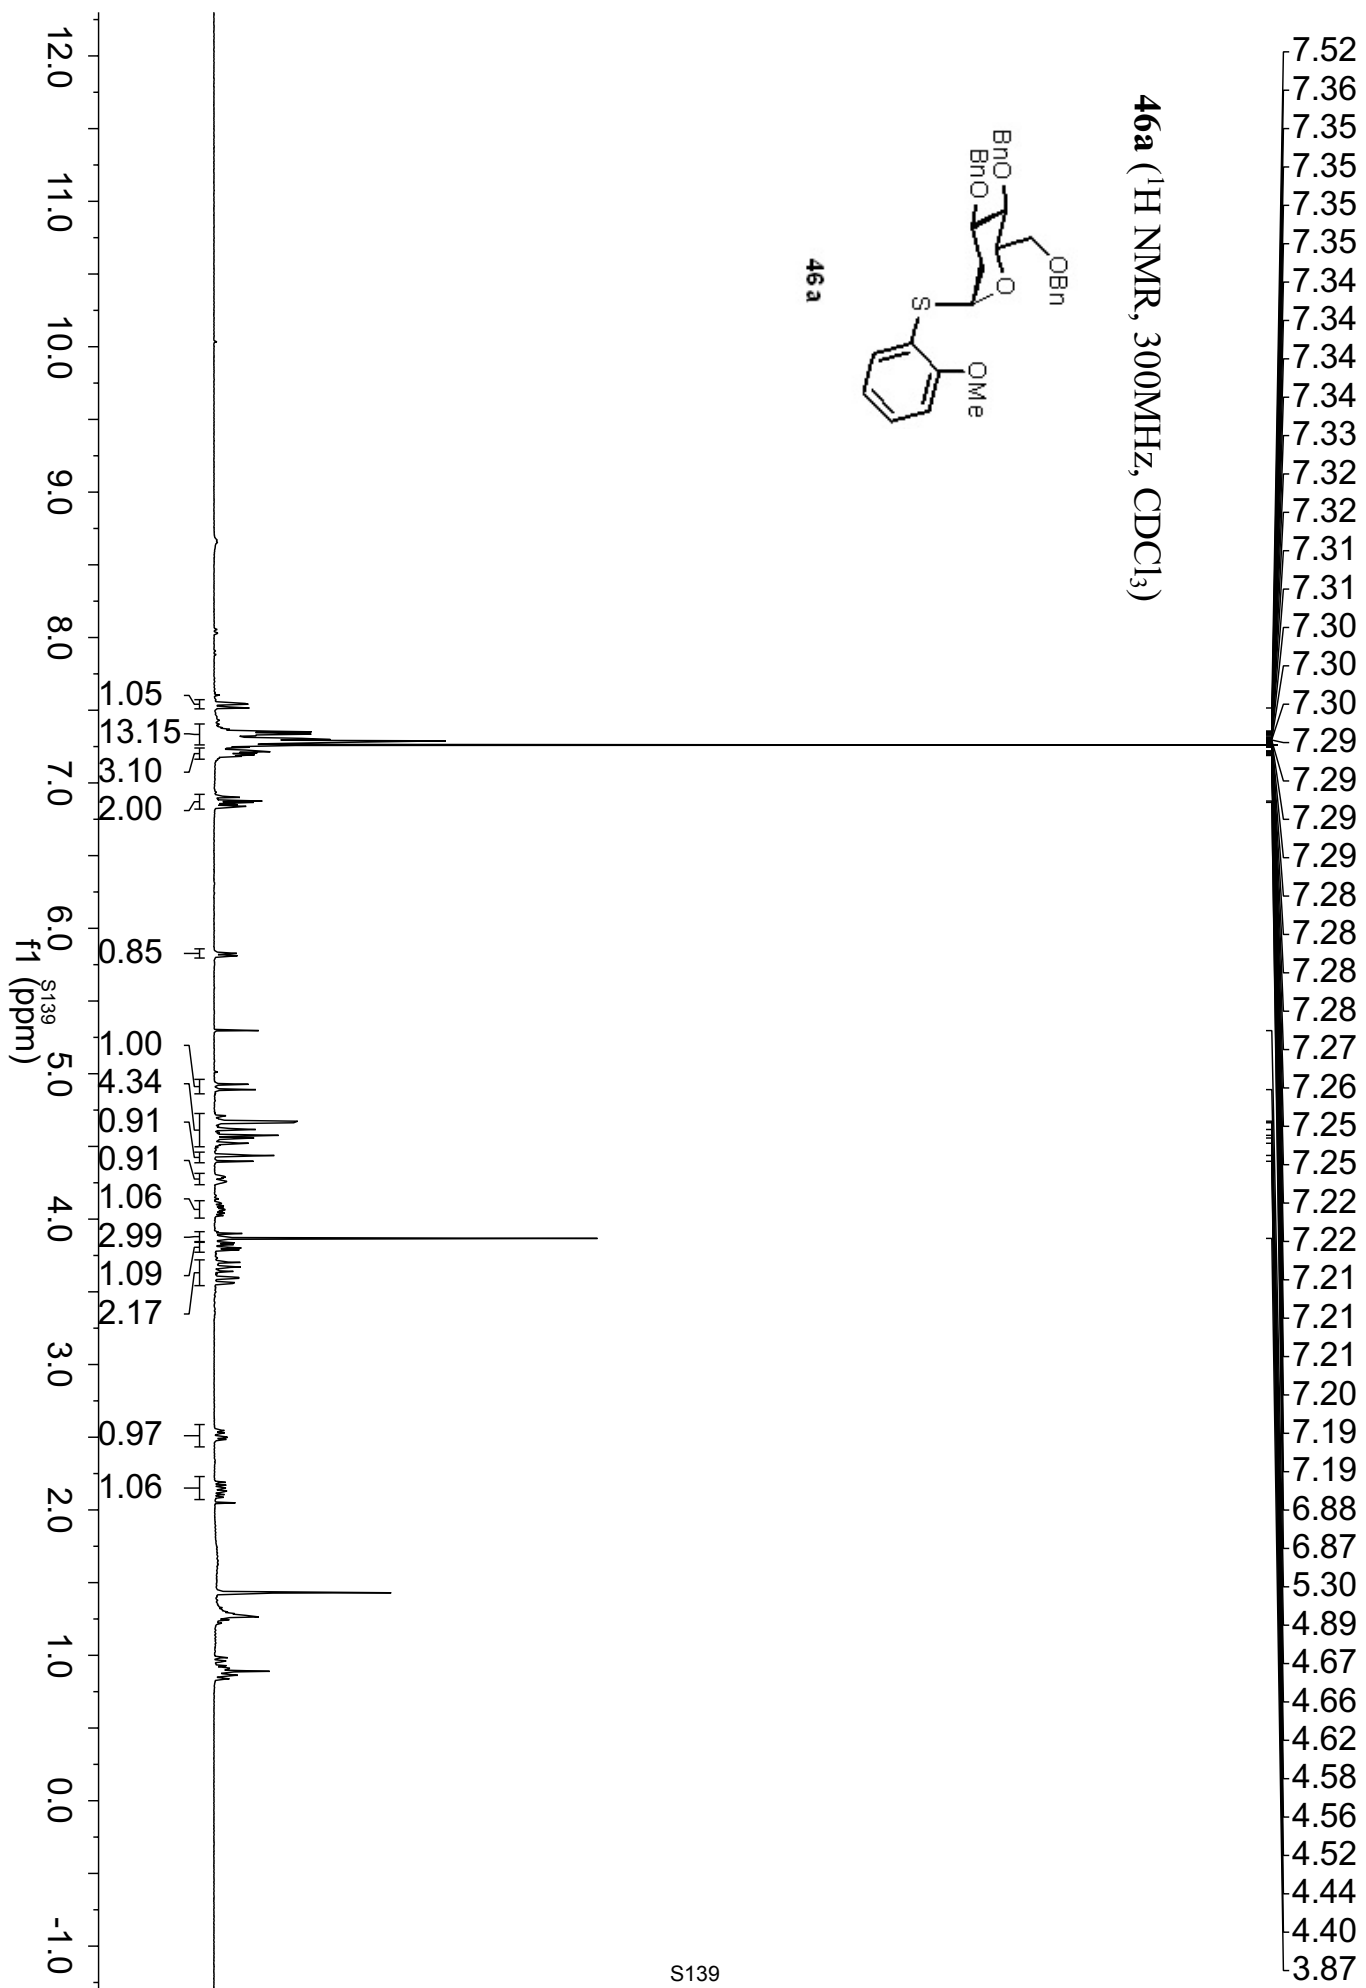

**46a** ( $^{13}\text{C}$  NMR, 75MHz,  $\text{CDCl}_3$ )

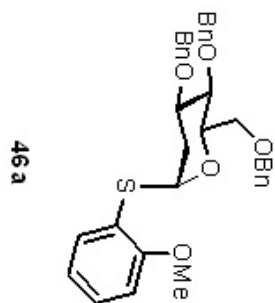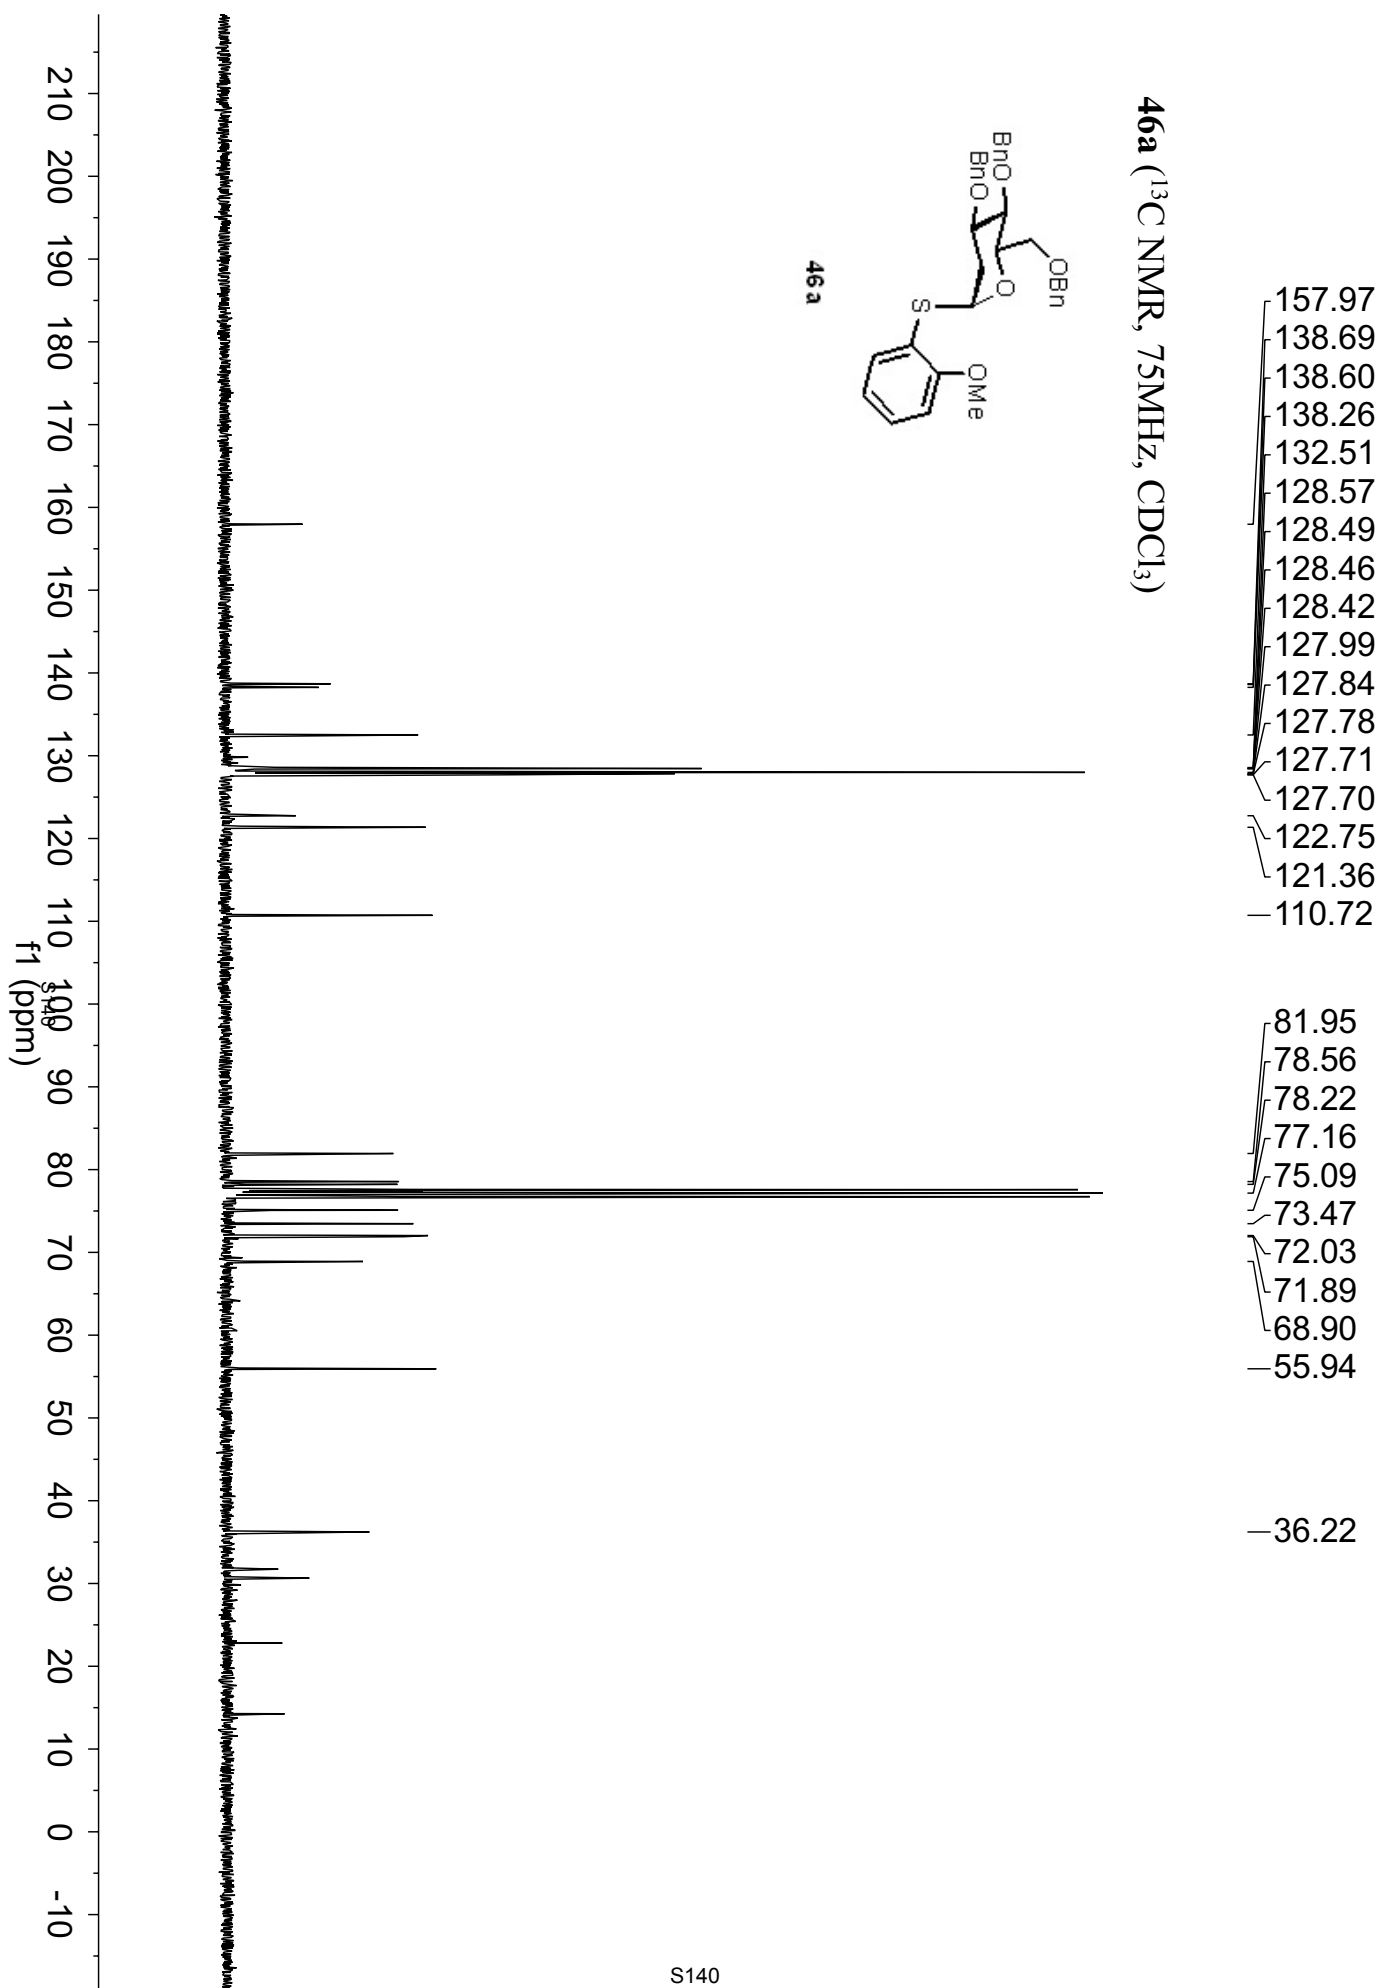

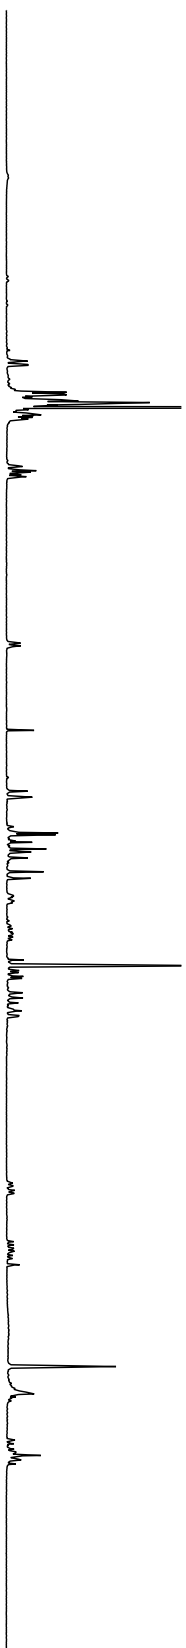

46a (<sup>1</sup>H-<sup>13</sup>C Coupled HSQC)

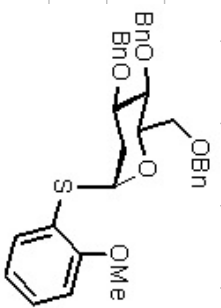

46a

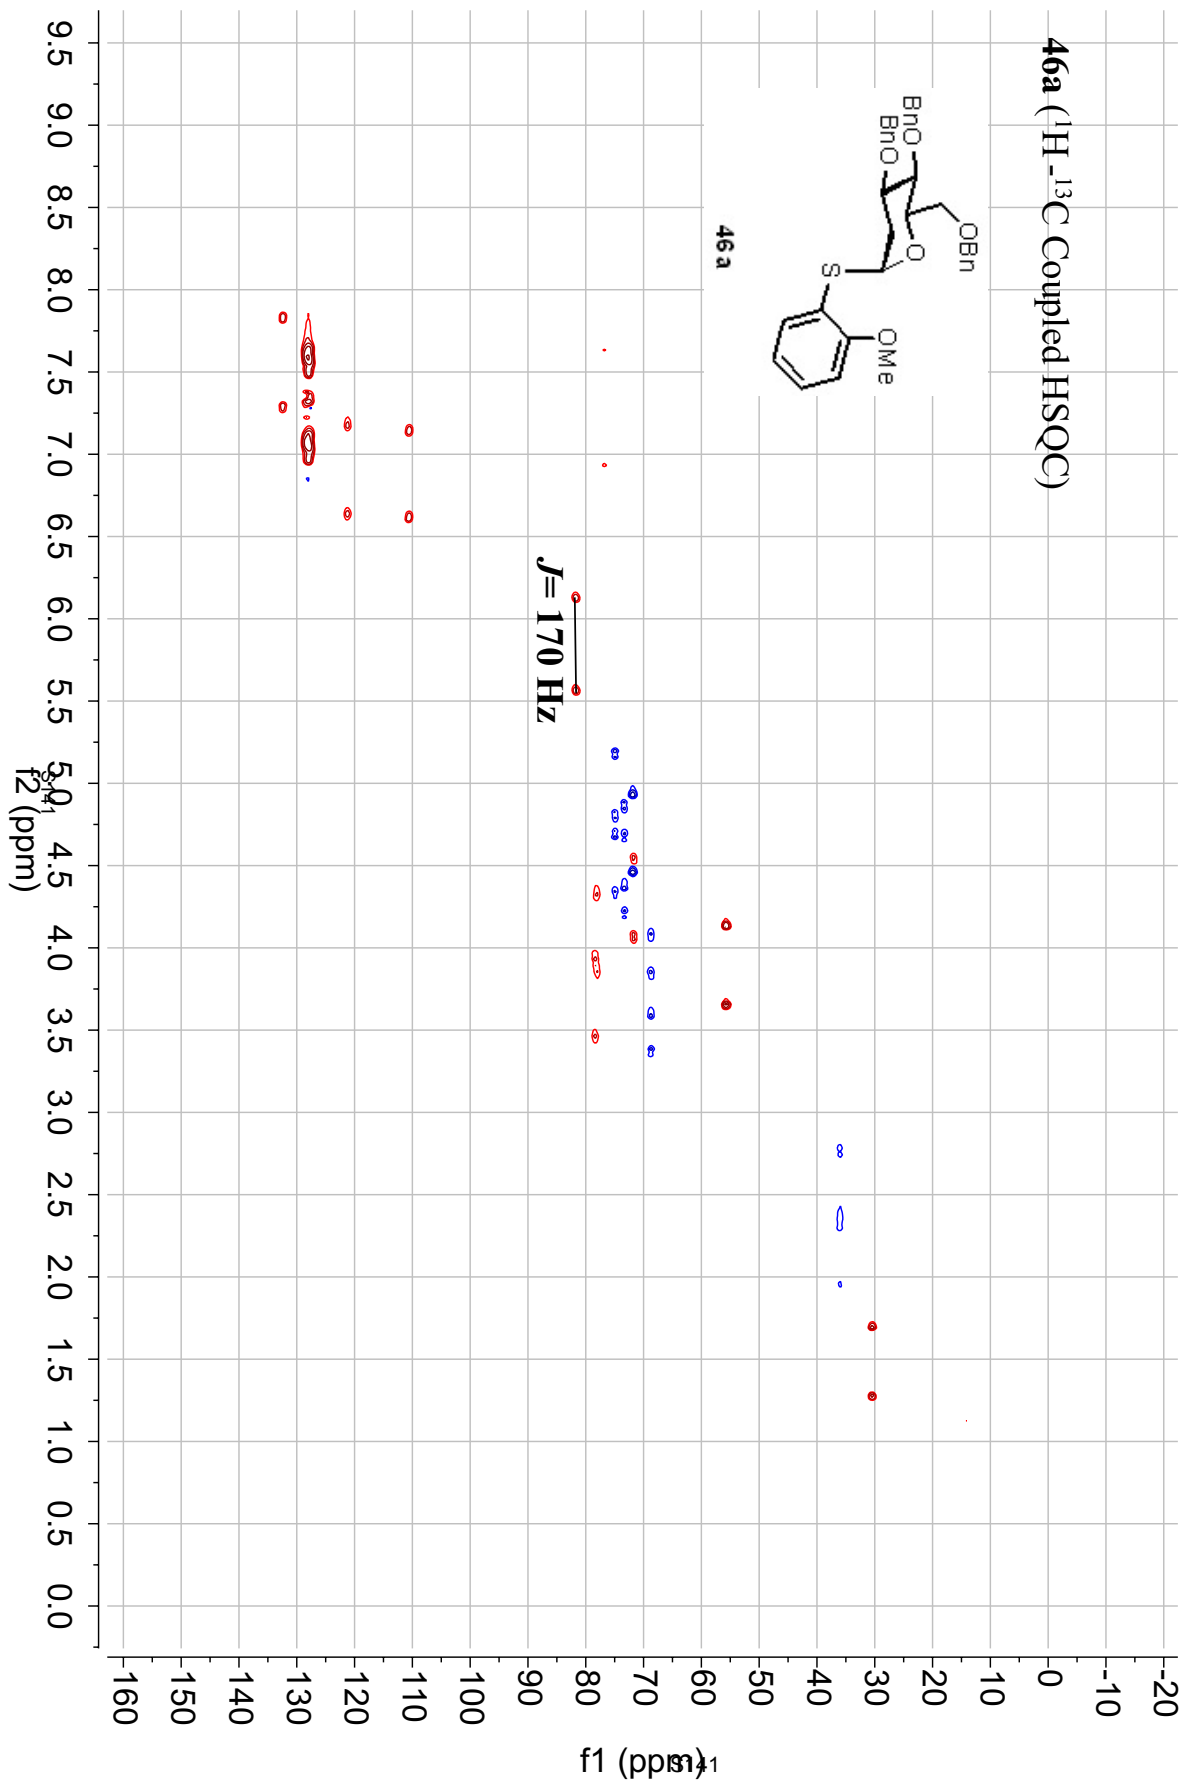



46a (<sup>1</sup>H-<sup>13</sup>C HSQC)

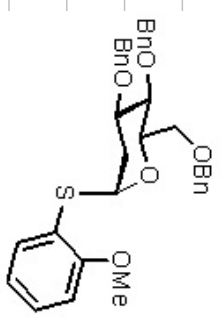

46a

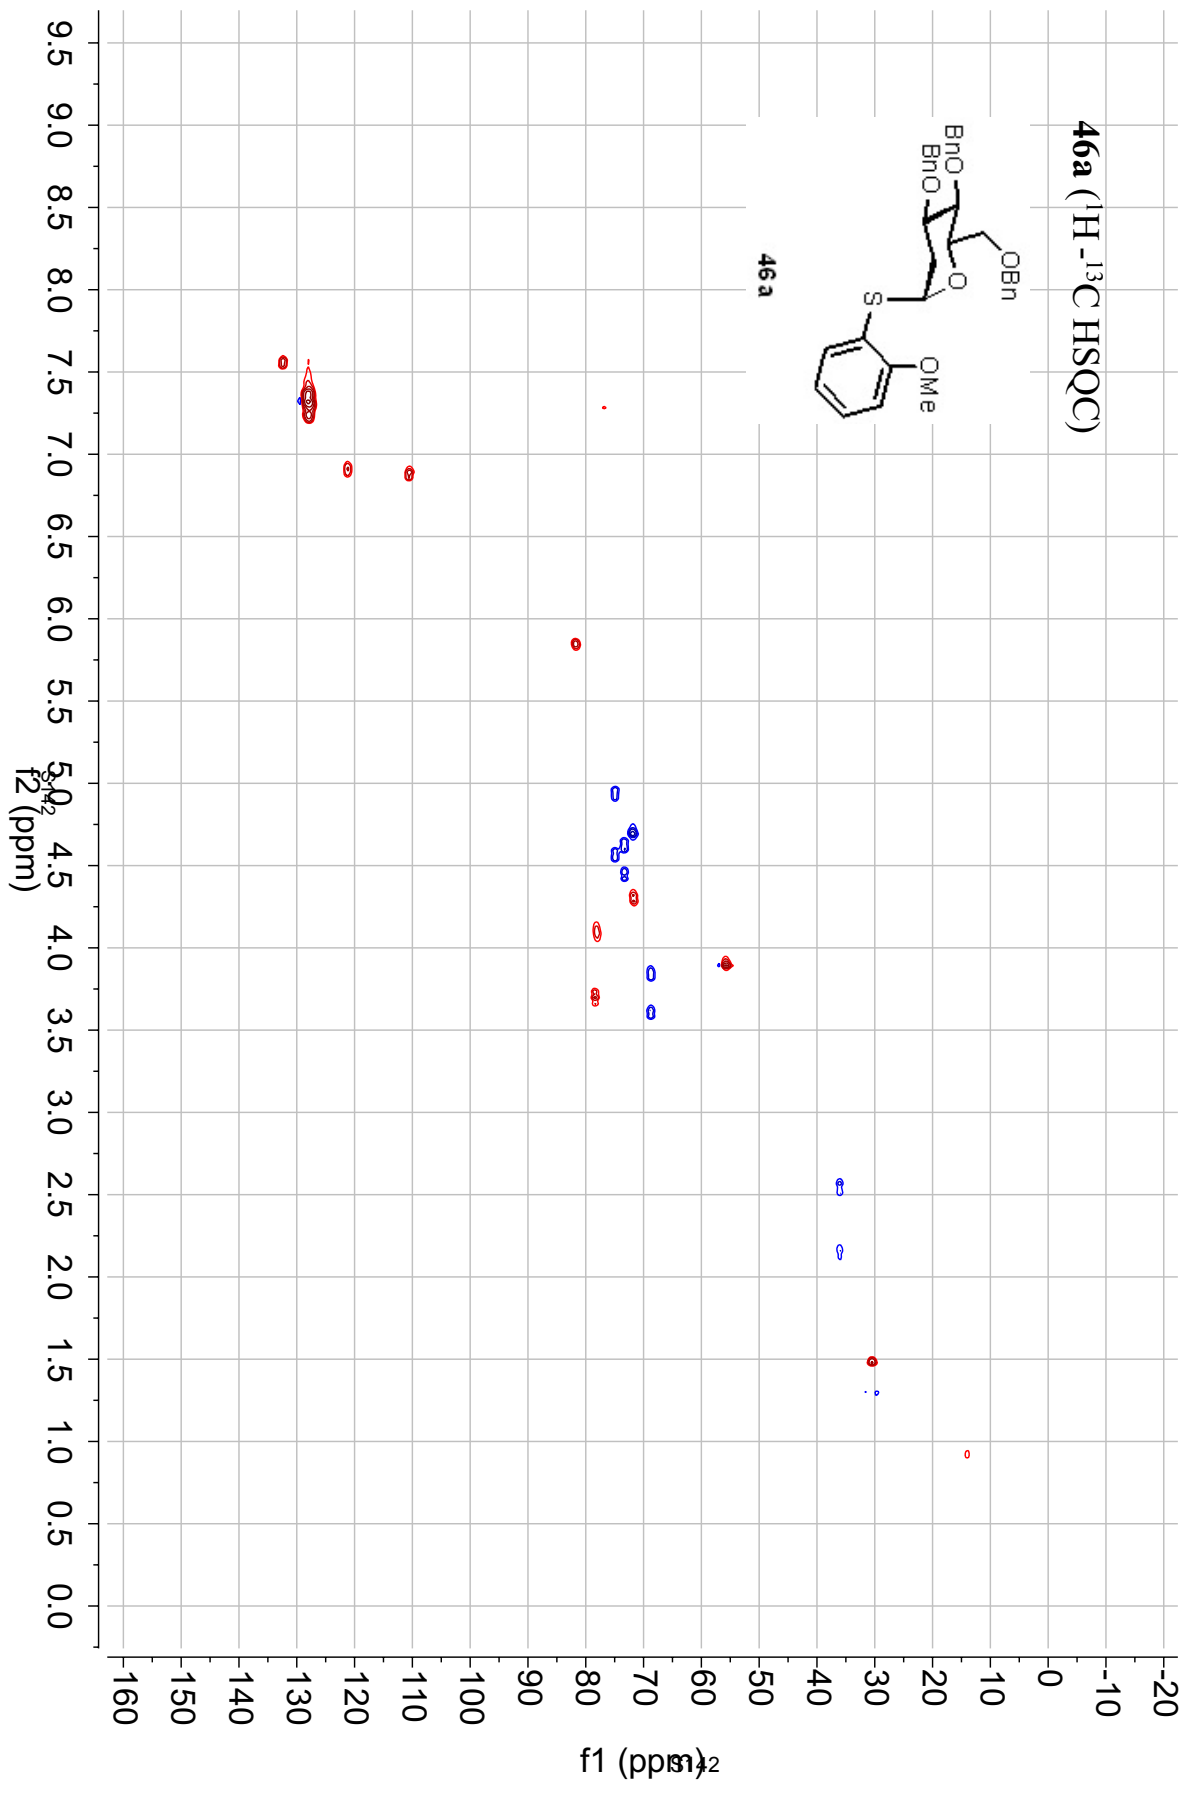

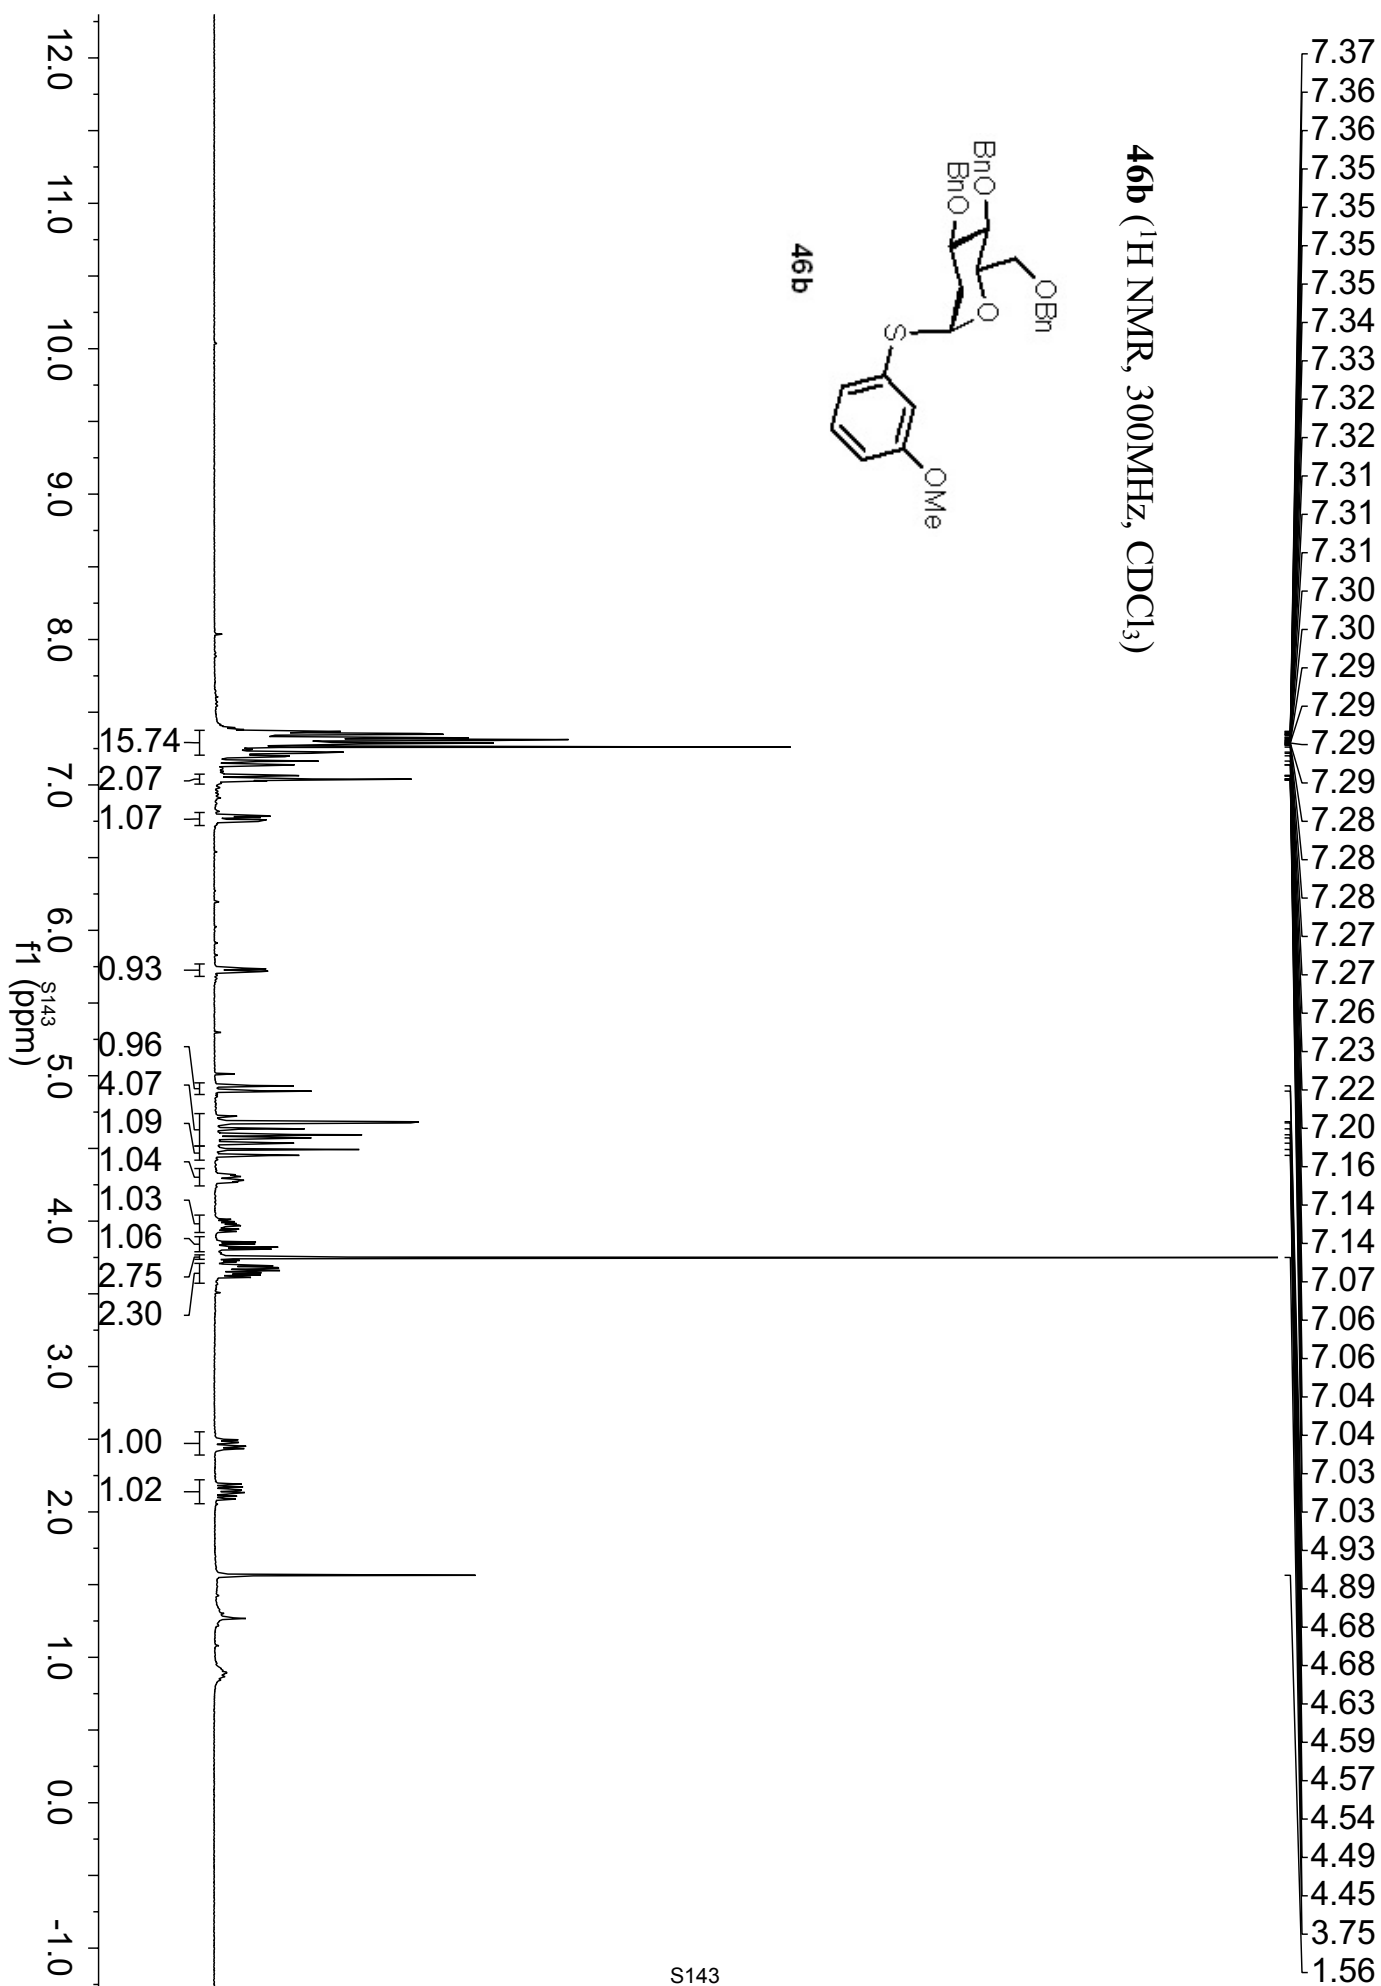

**46b** ( $^{13}\text{C}$  NMR, 75MHz,  $\text{CDCl}_3$ )

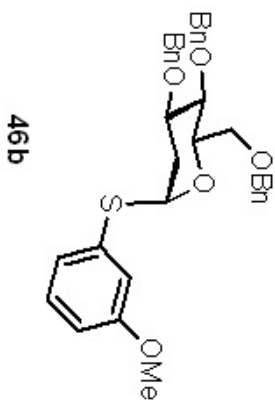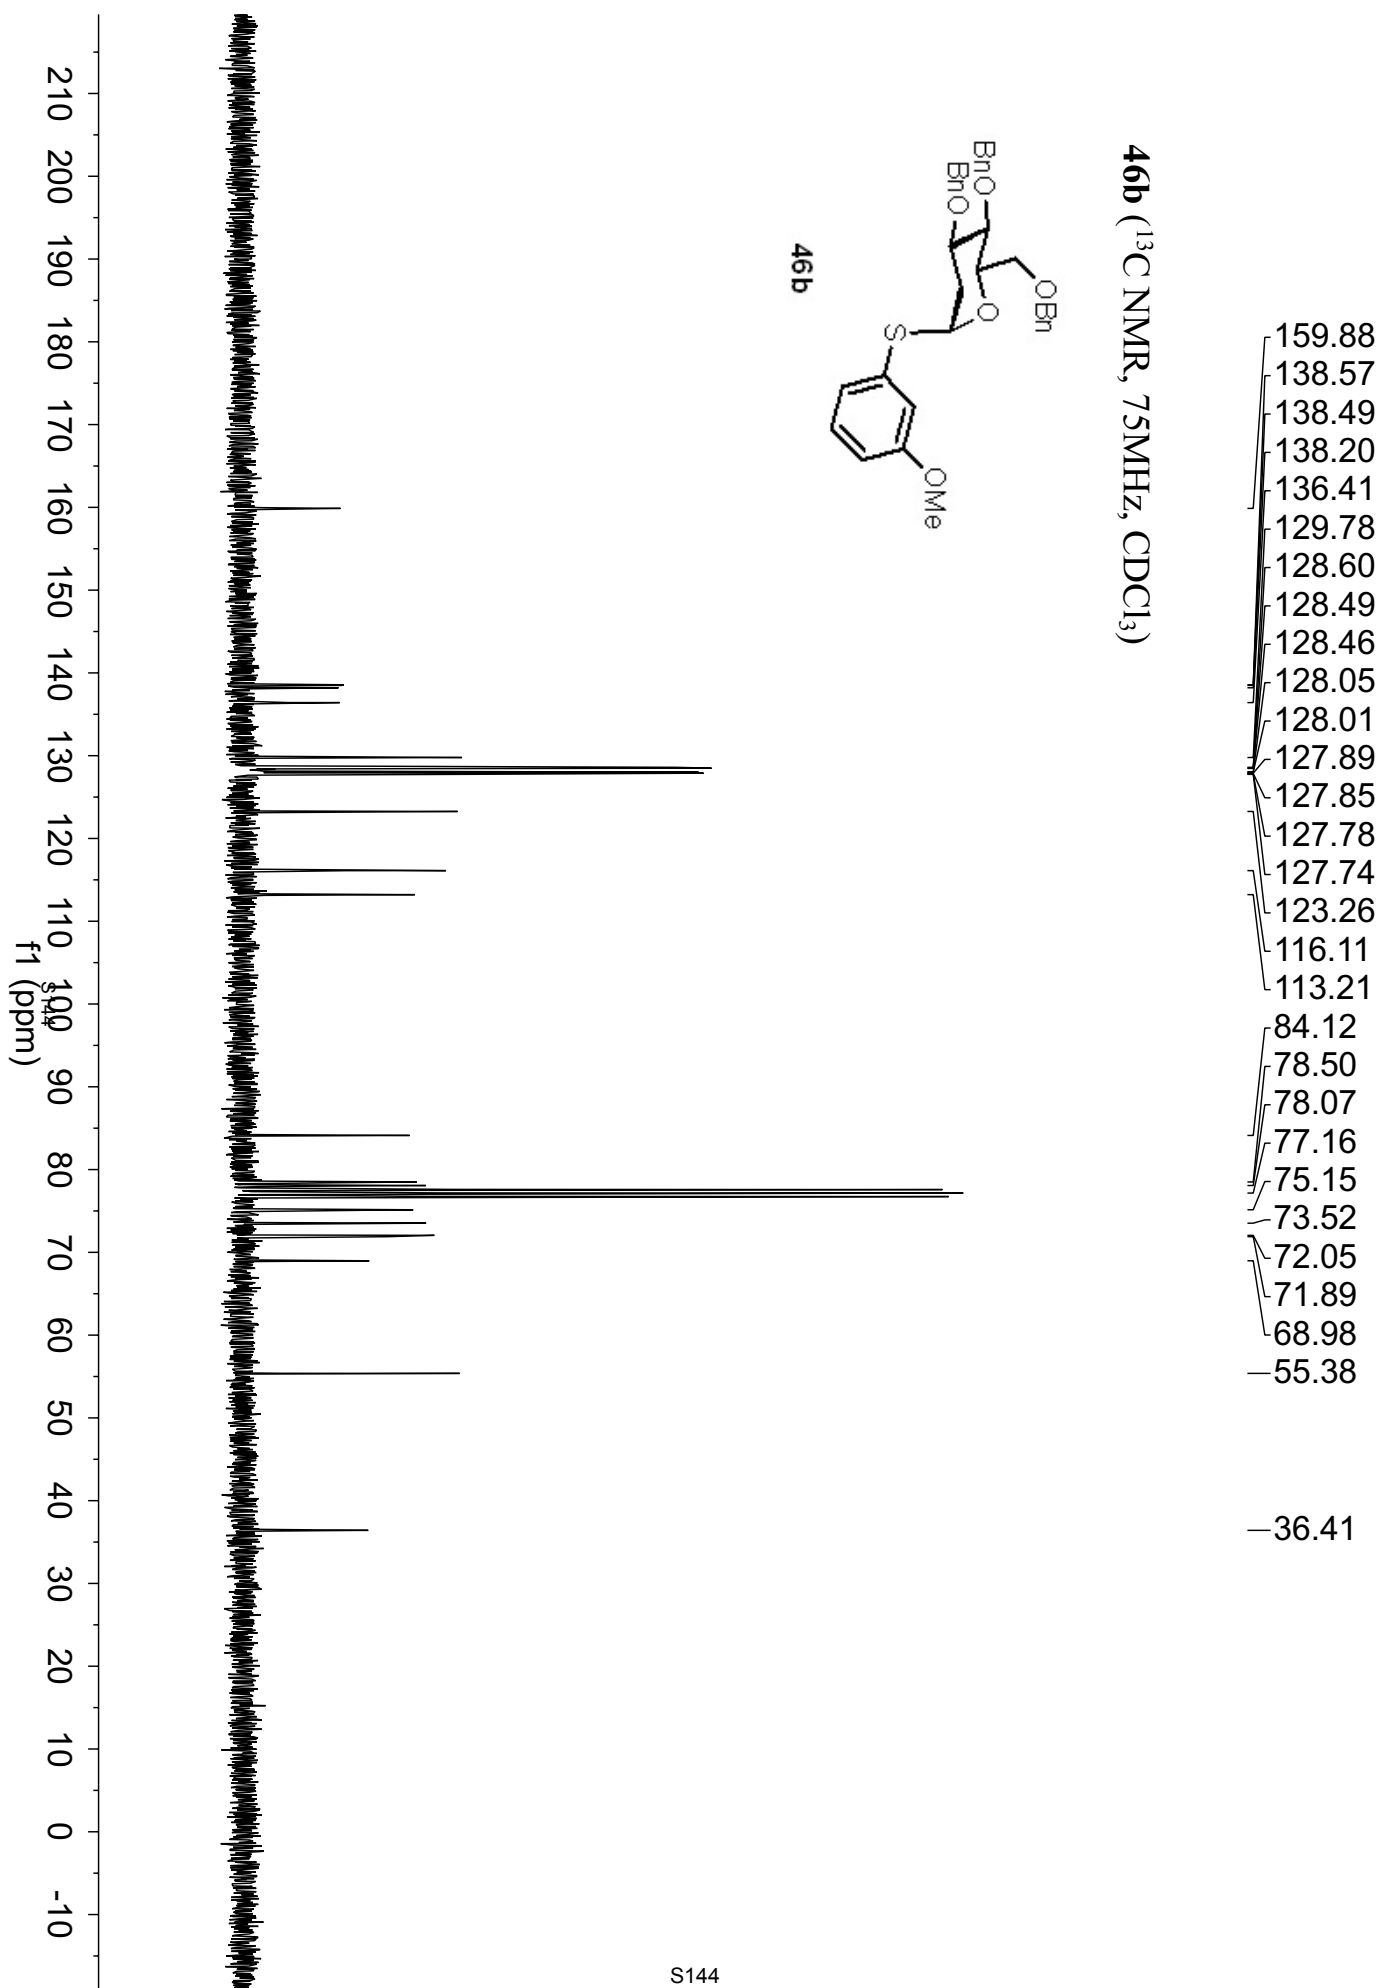







46c (<sup>1</sup>H NMR, 300MHz, CDCl<sub>3</sub>)

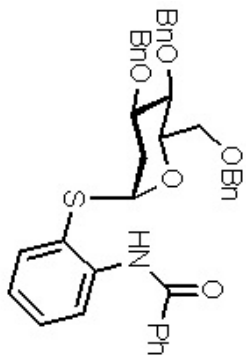

46c

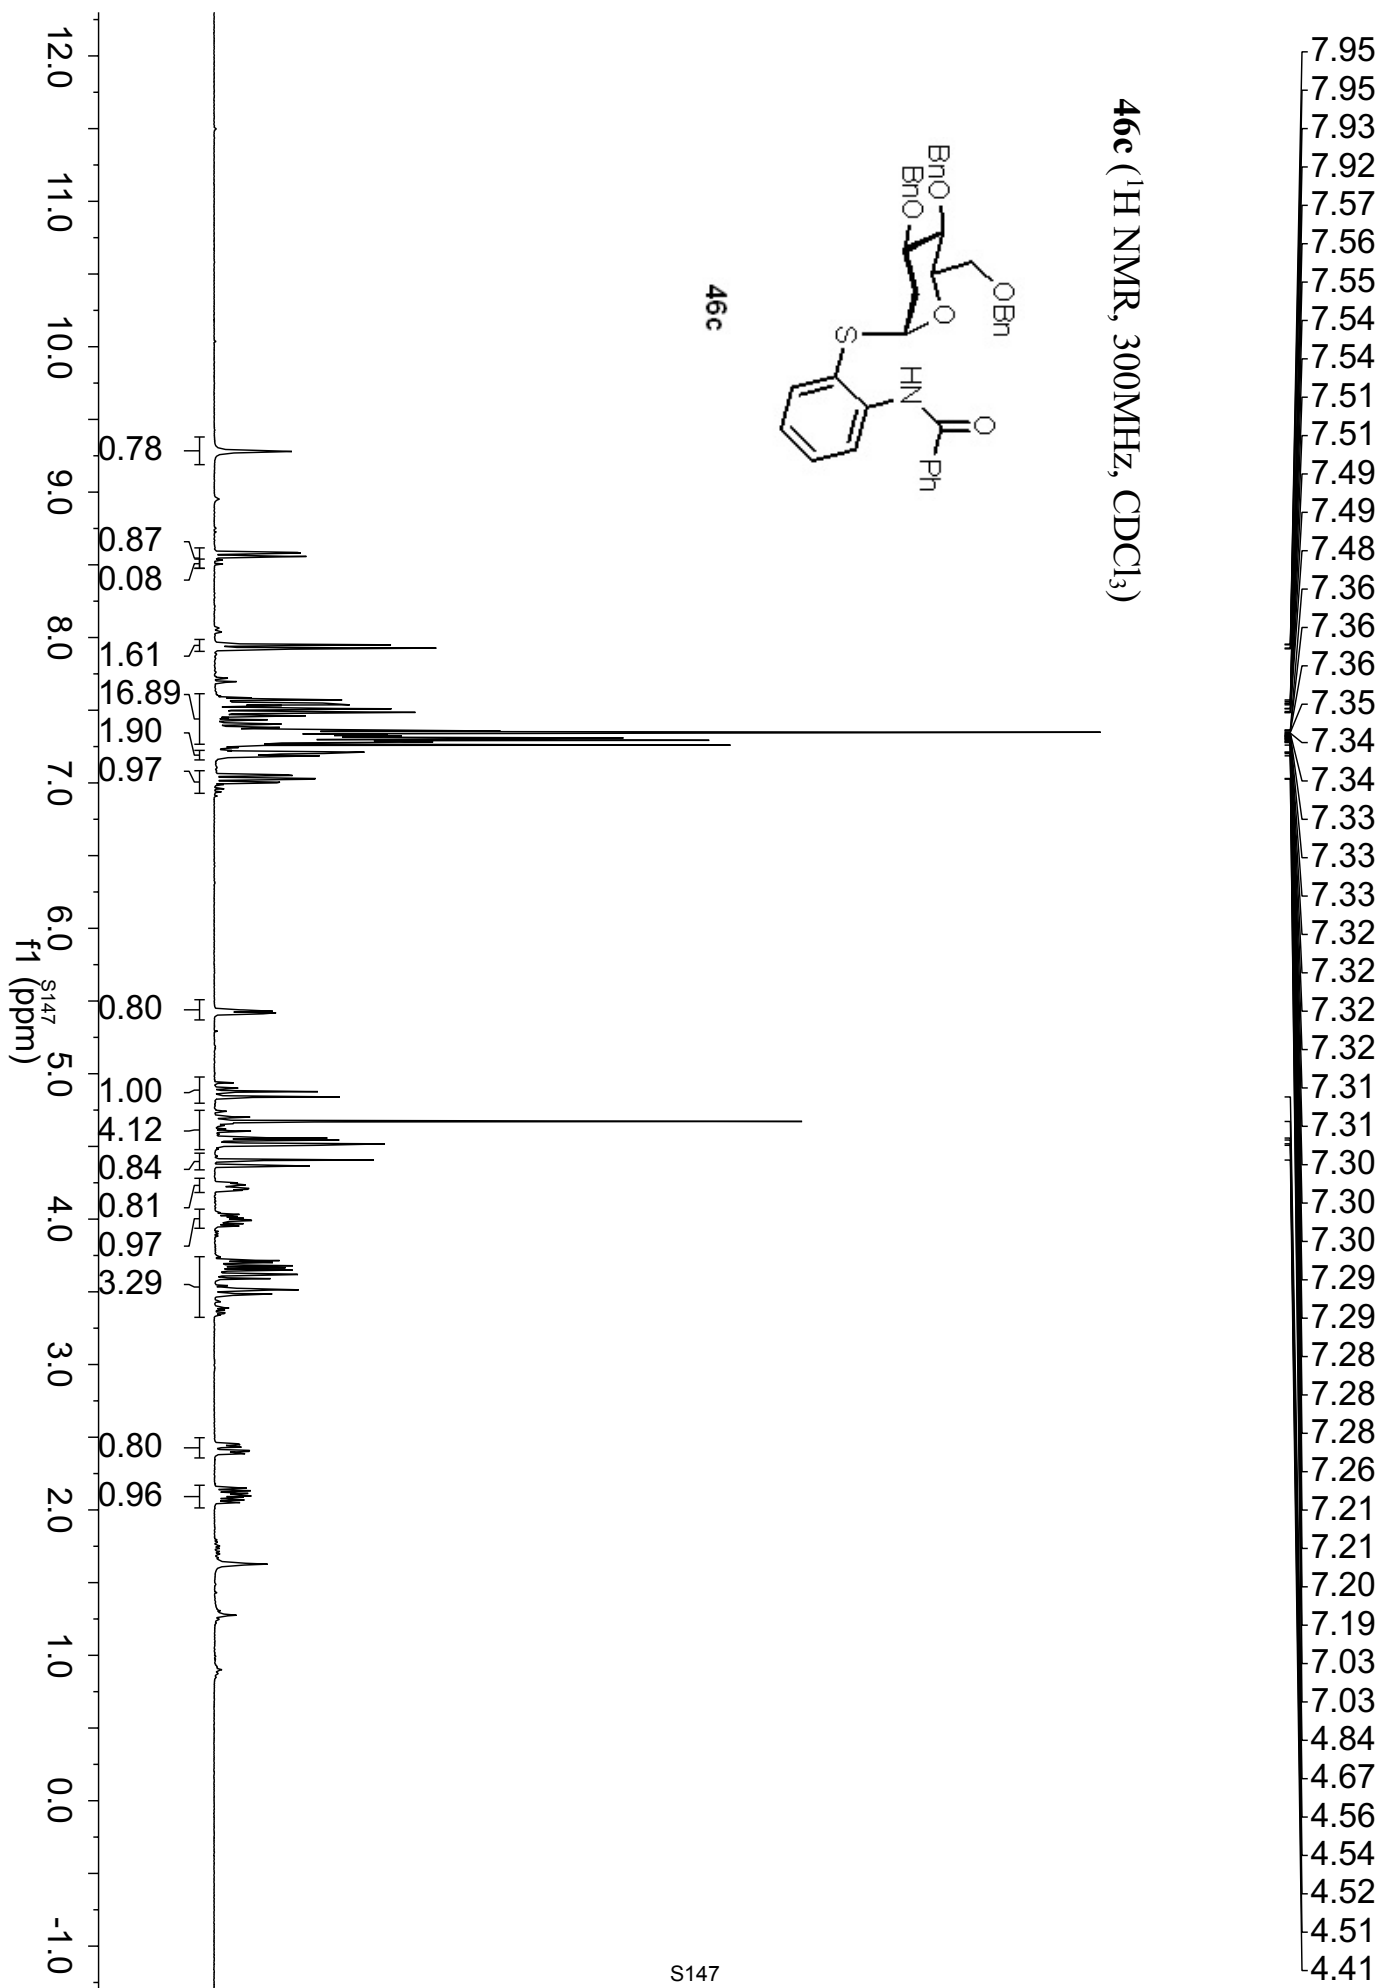

**46c** (<sup>13</sup>C NMR, 75MHz, CDCl<sub>3</sub>)

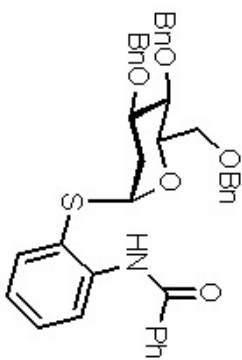

46c

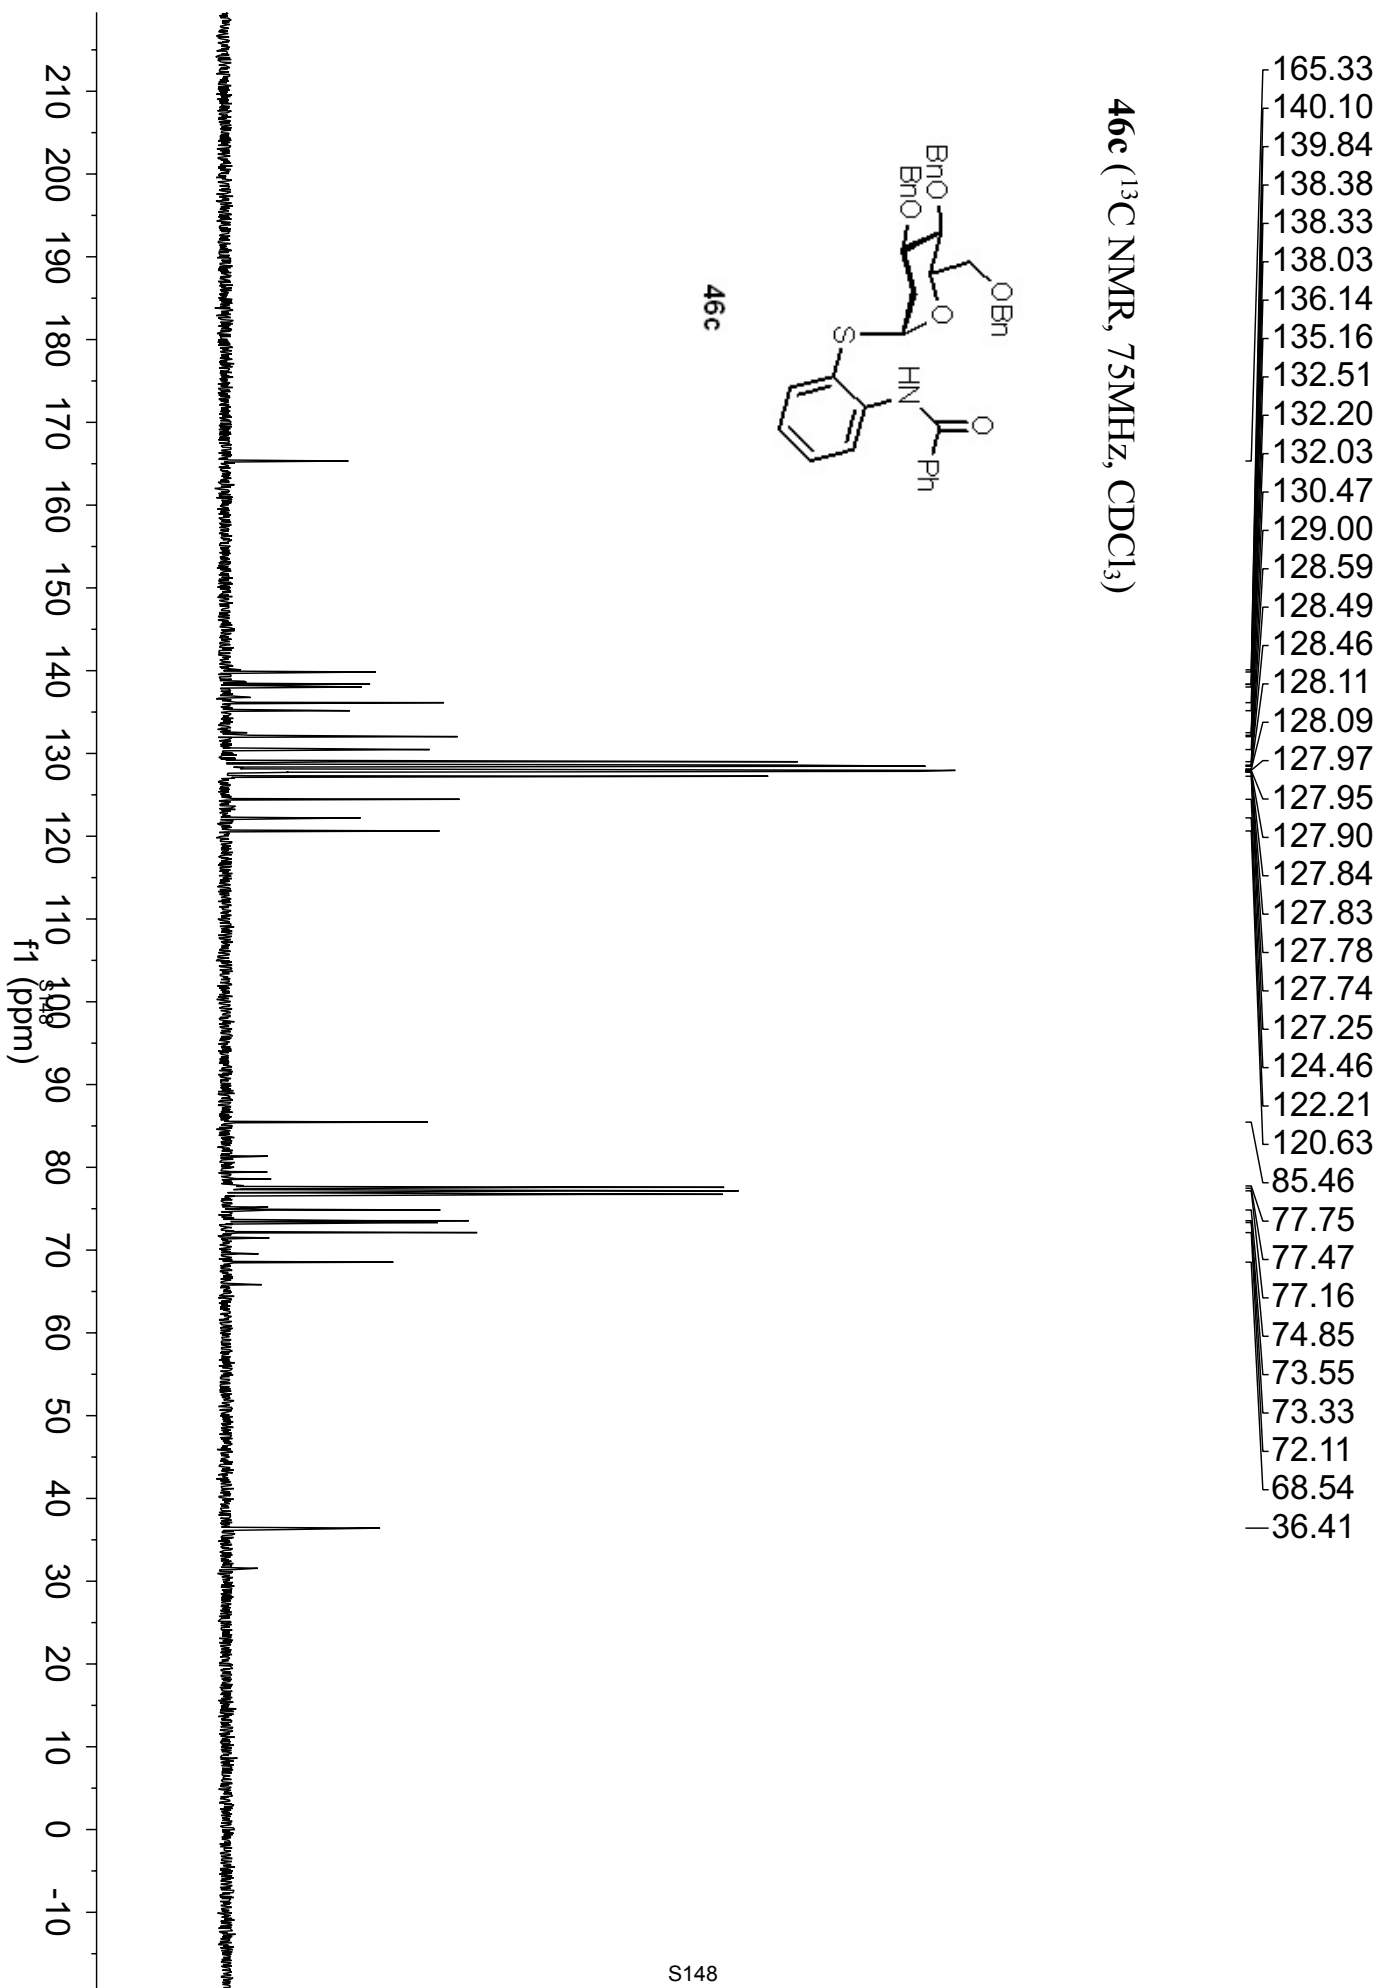

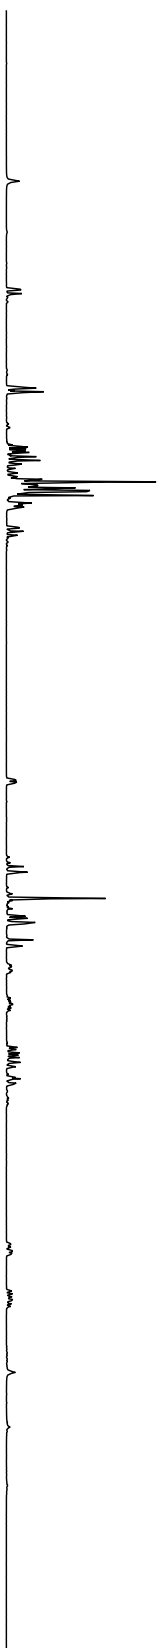

**46c** (<sup>1</sup>H-<sup>13</sup>C Coupled HSQC)

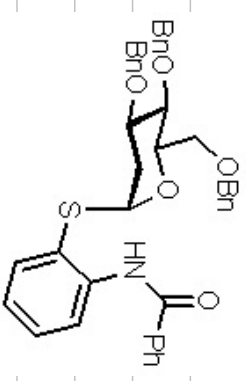

46c

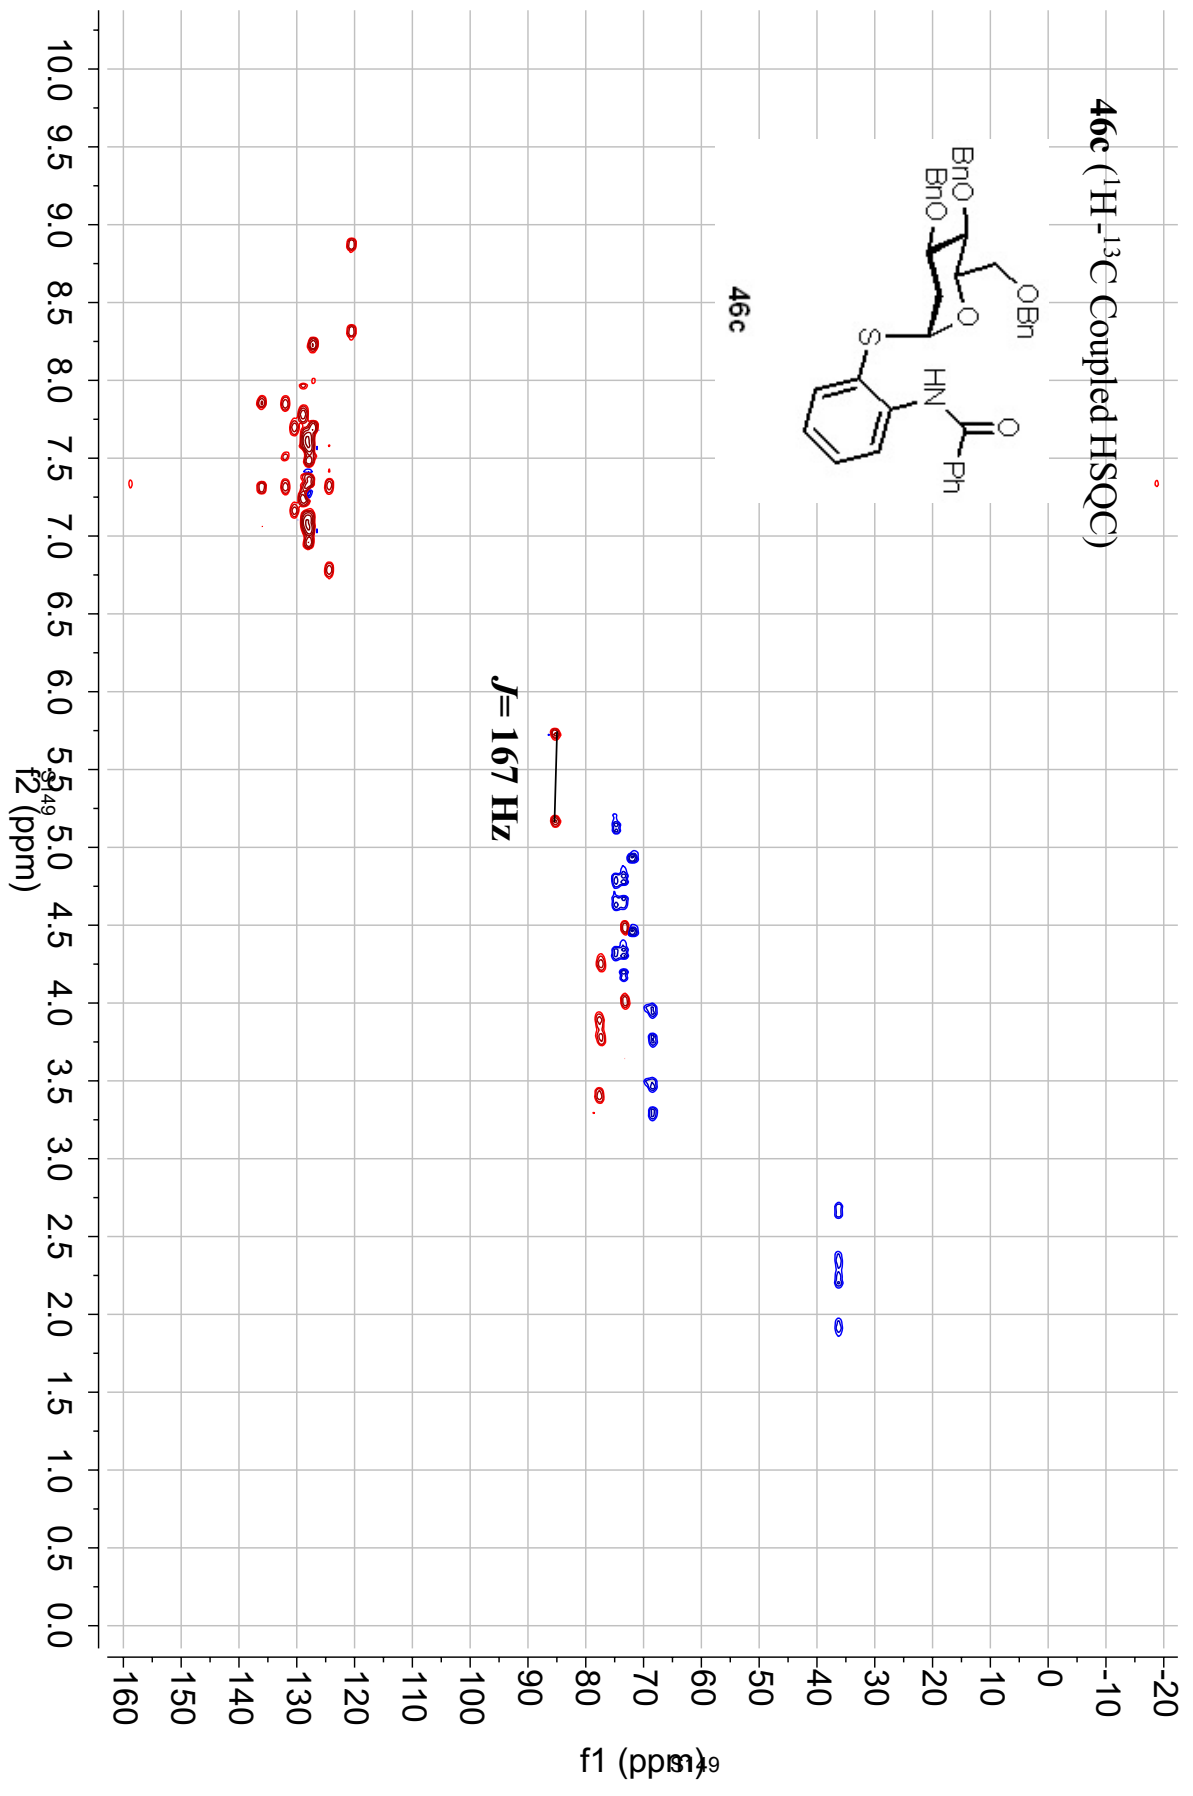

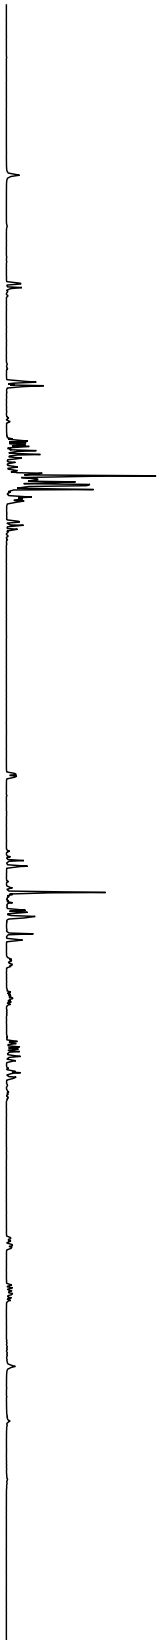

**46c** ( $^1\text{H}$ - $^{13}\text{C}$  HSQC)

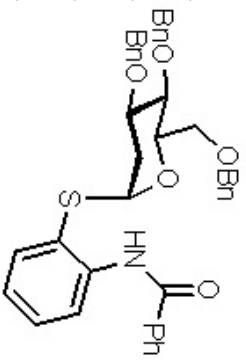

46c

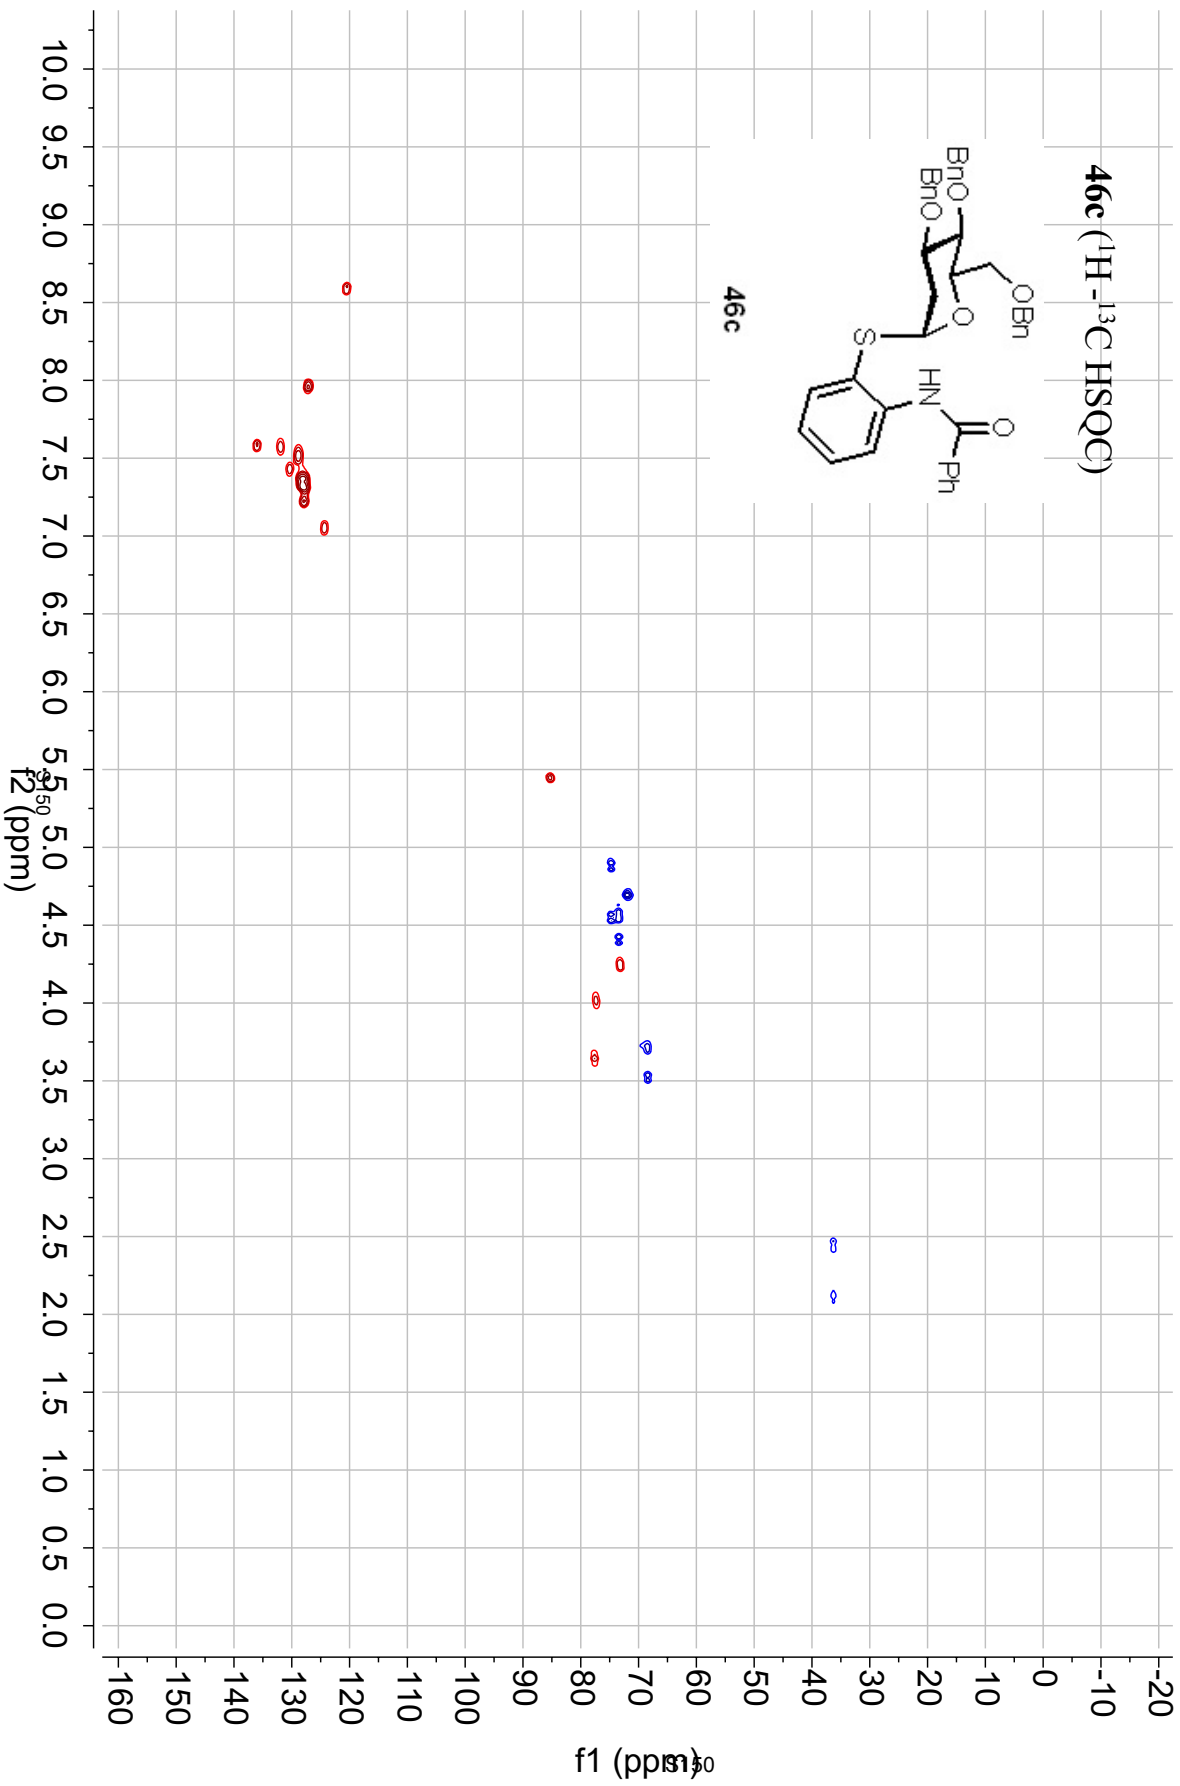

**46d** (<sup>1</sup>H NMR, 300MHz, CDCl<sub>3</sub>)

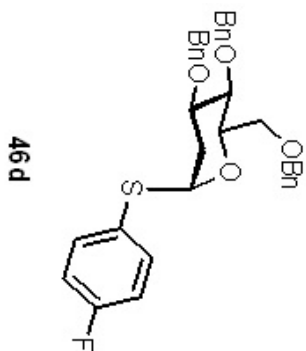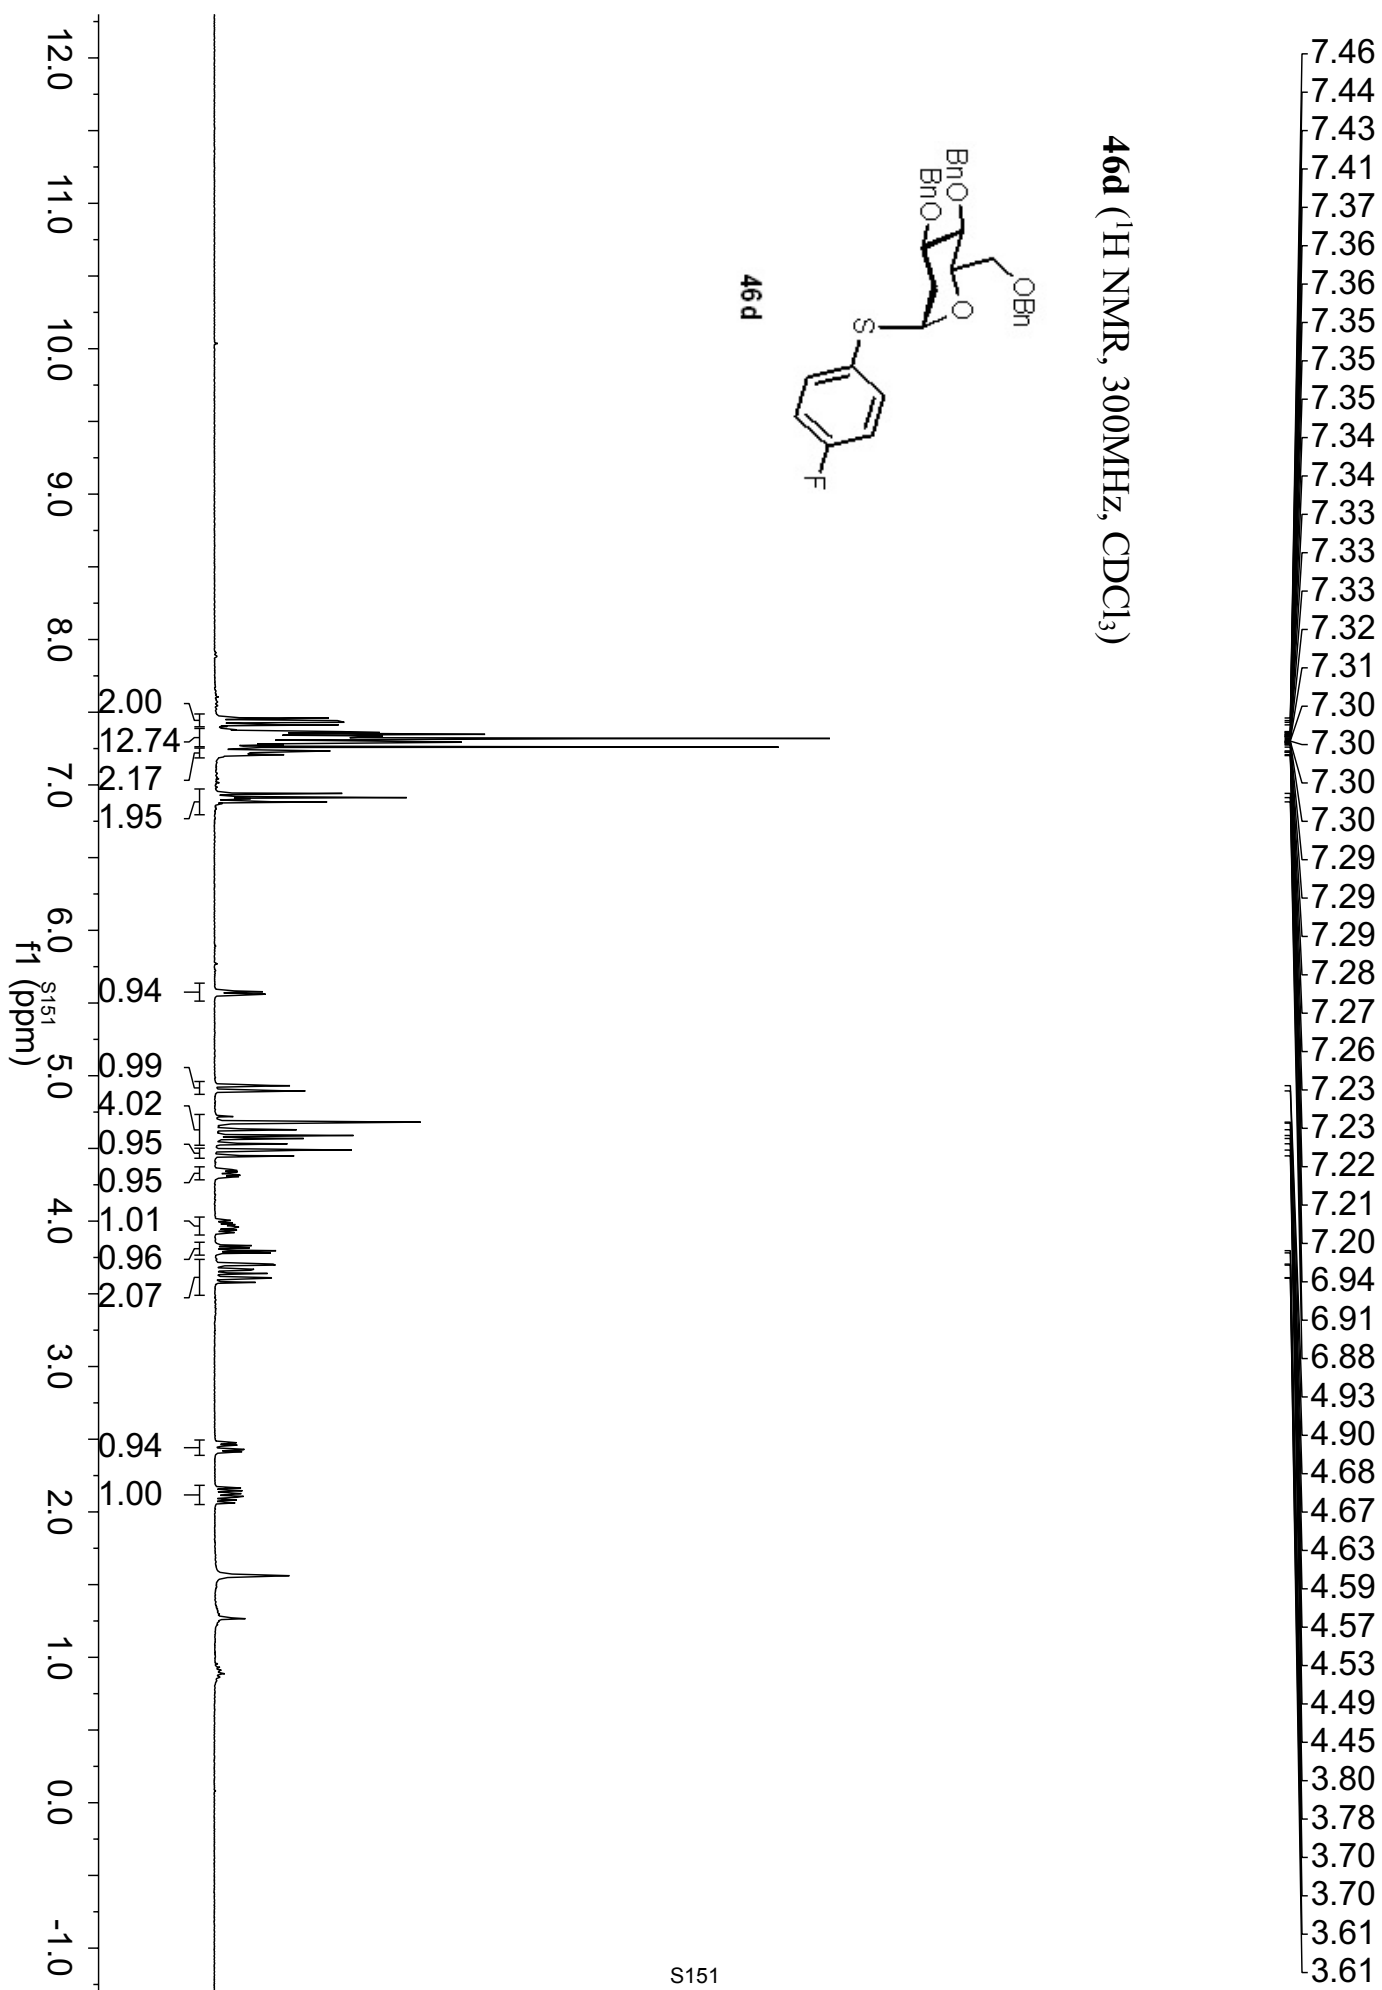

**46d** ( $^{13}\text{C}$  NMR, 75MHz,  $\text{CDCl}_3$ )

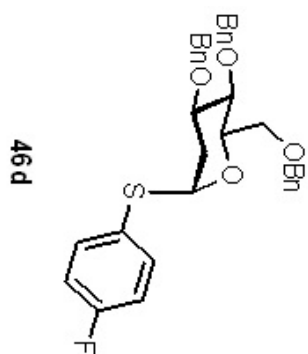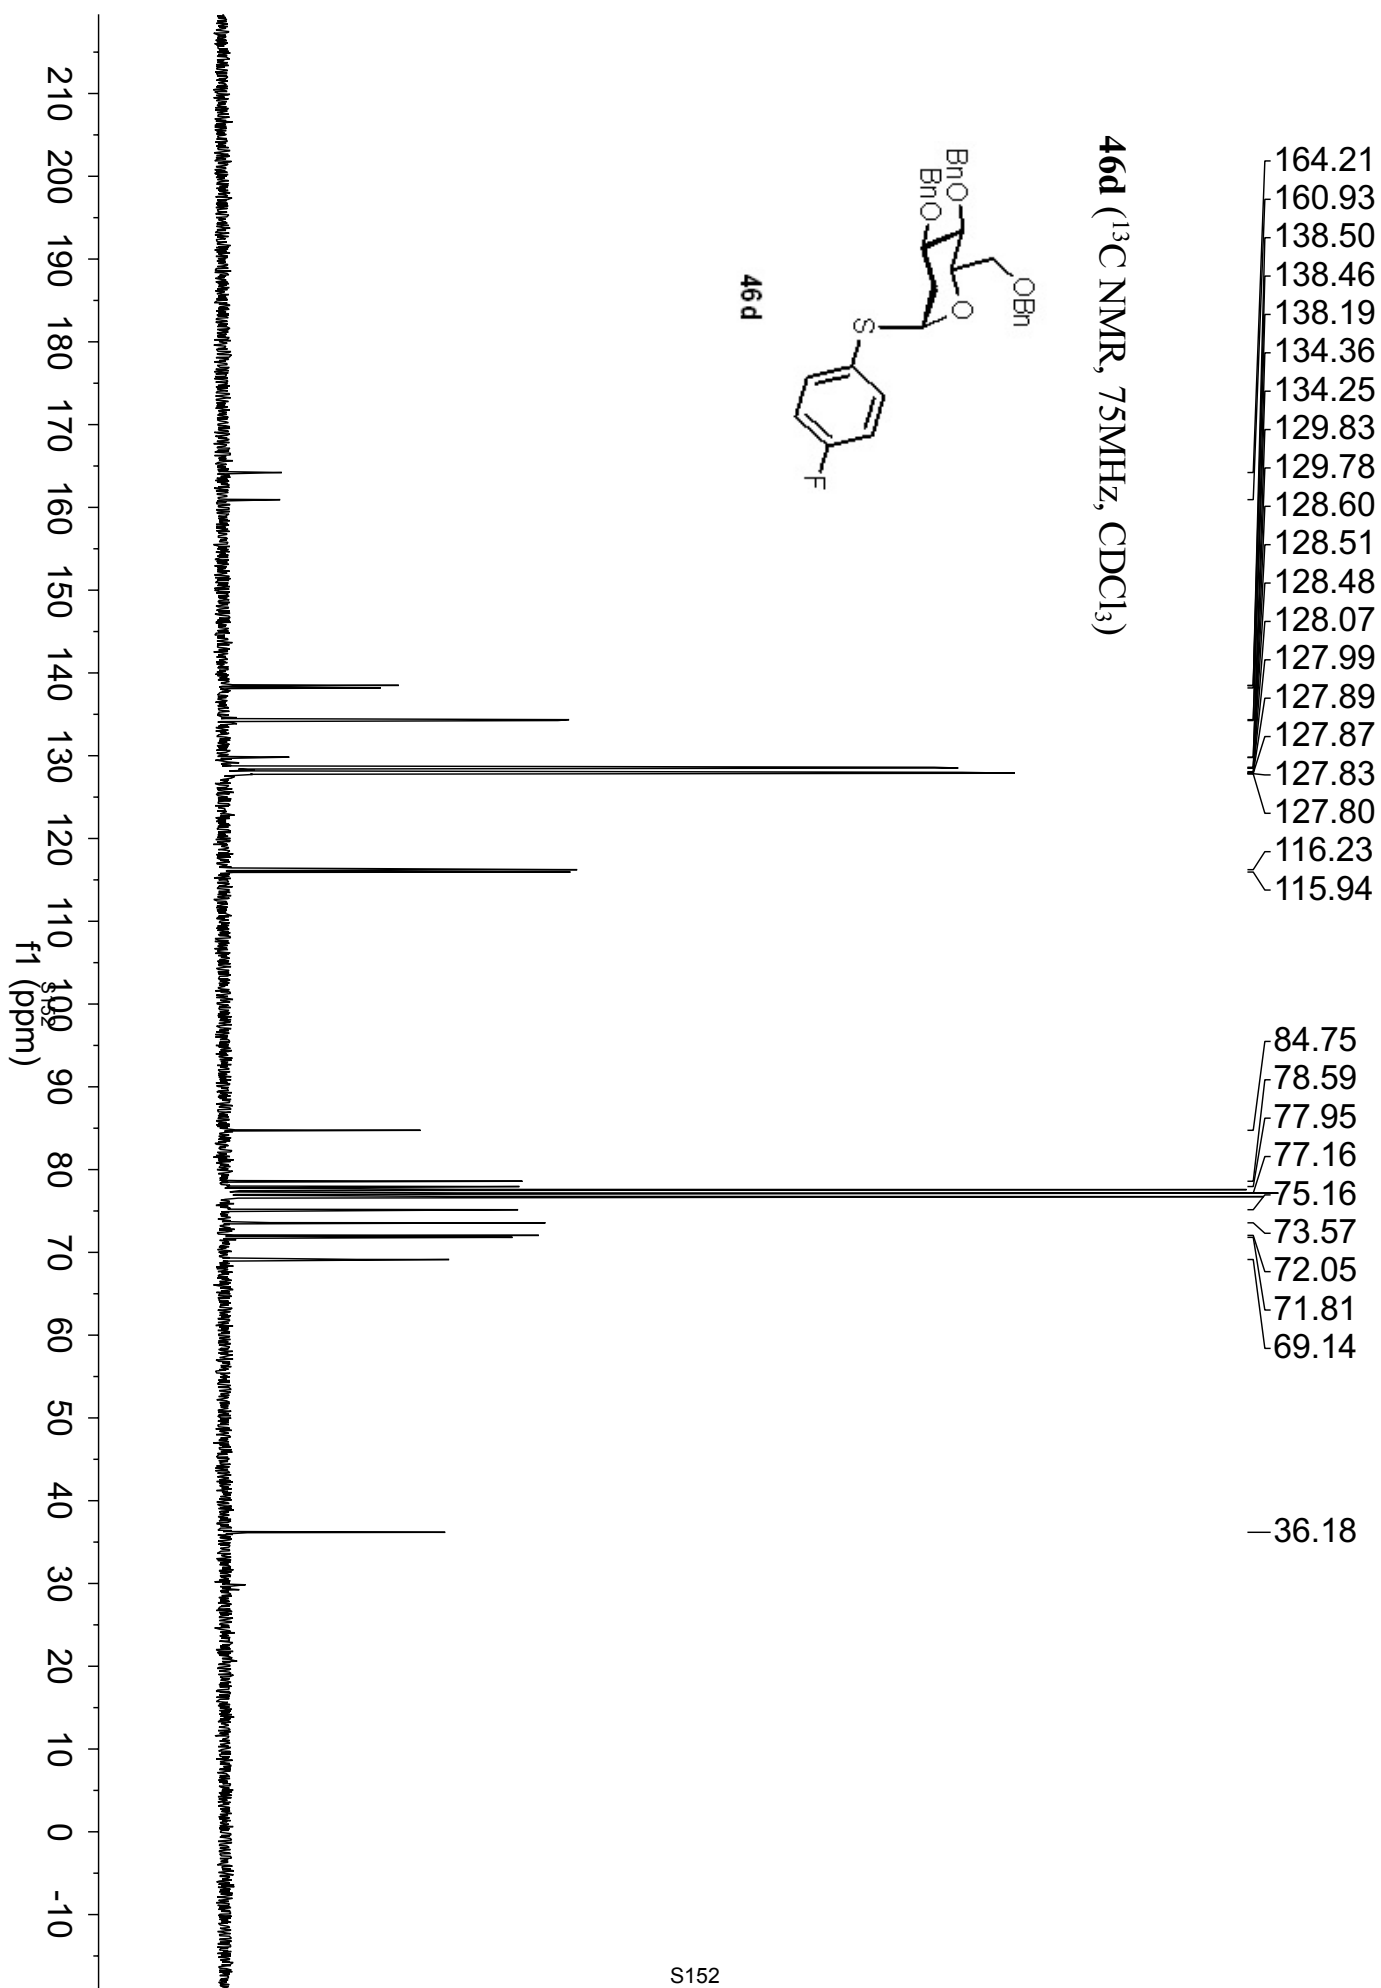



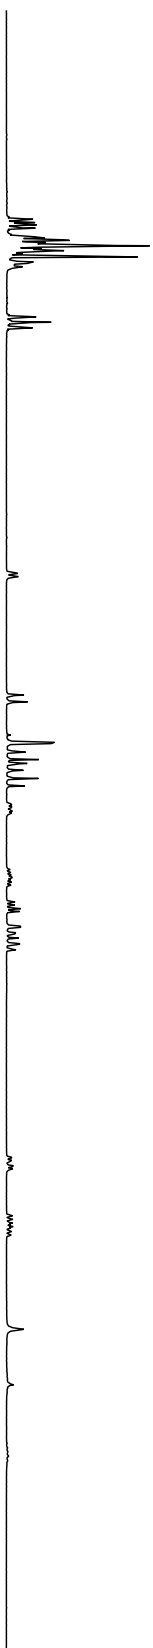

**46d** ( $^1\text{H}$ - $^{13}\text{C}$  Coupled HSQC)

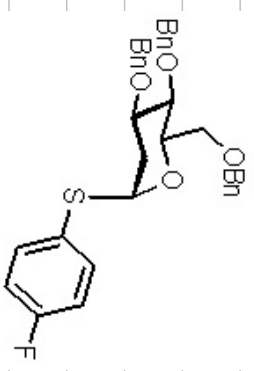

**46d**

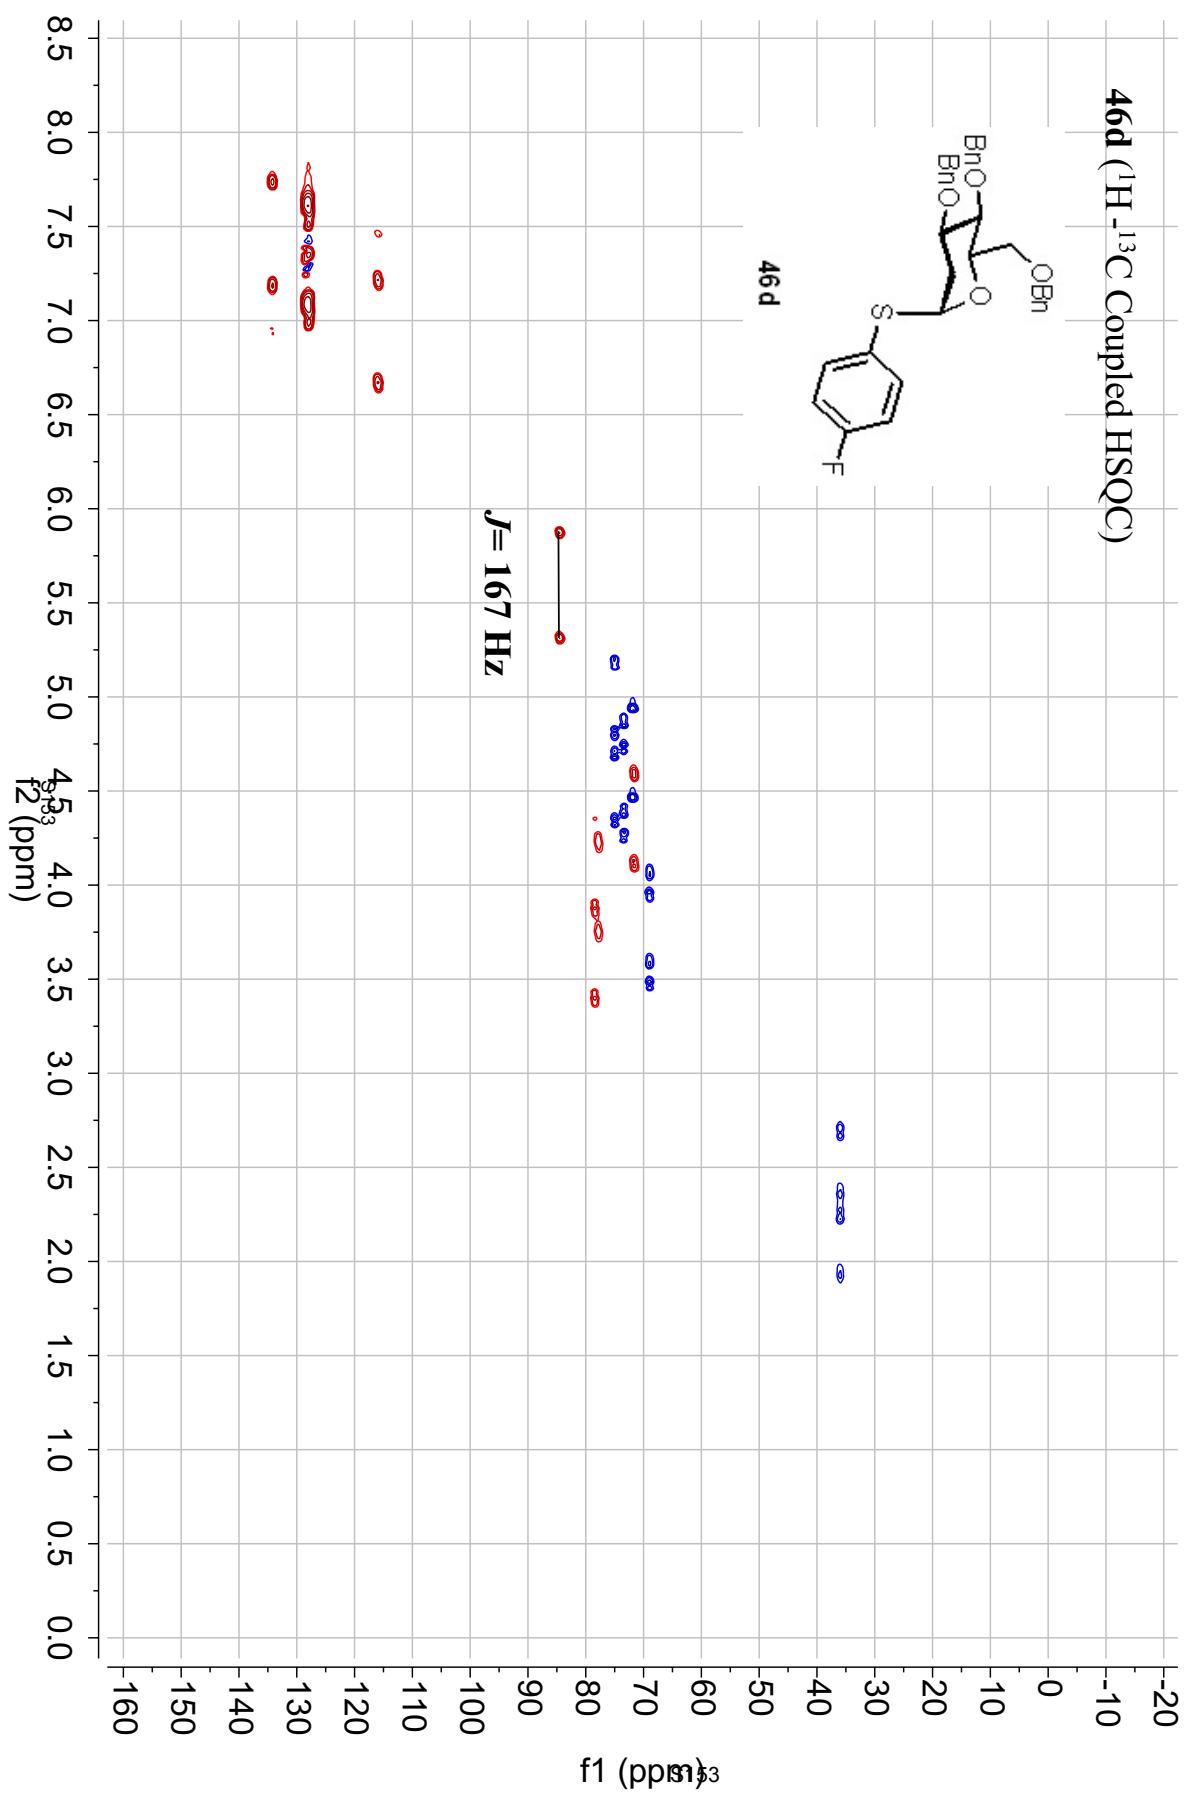



**46d** ( $^1\text{H}$ - $^{13}\text{C}$  HSQC)

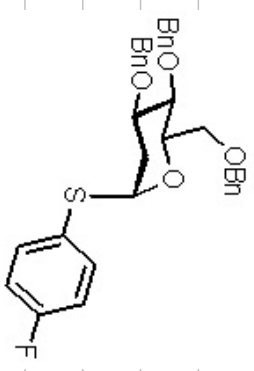

46d

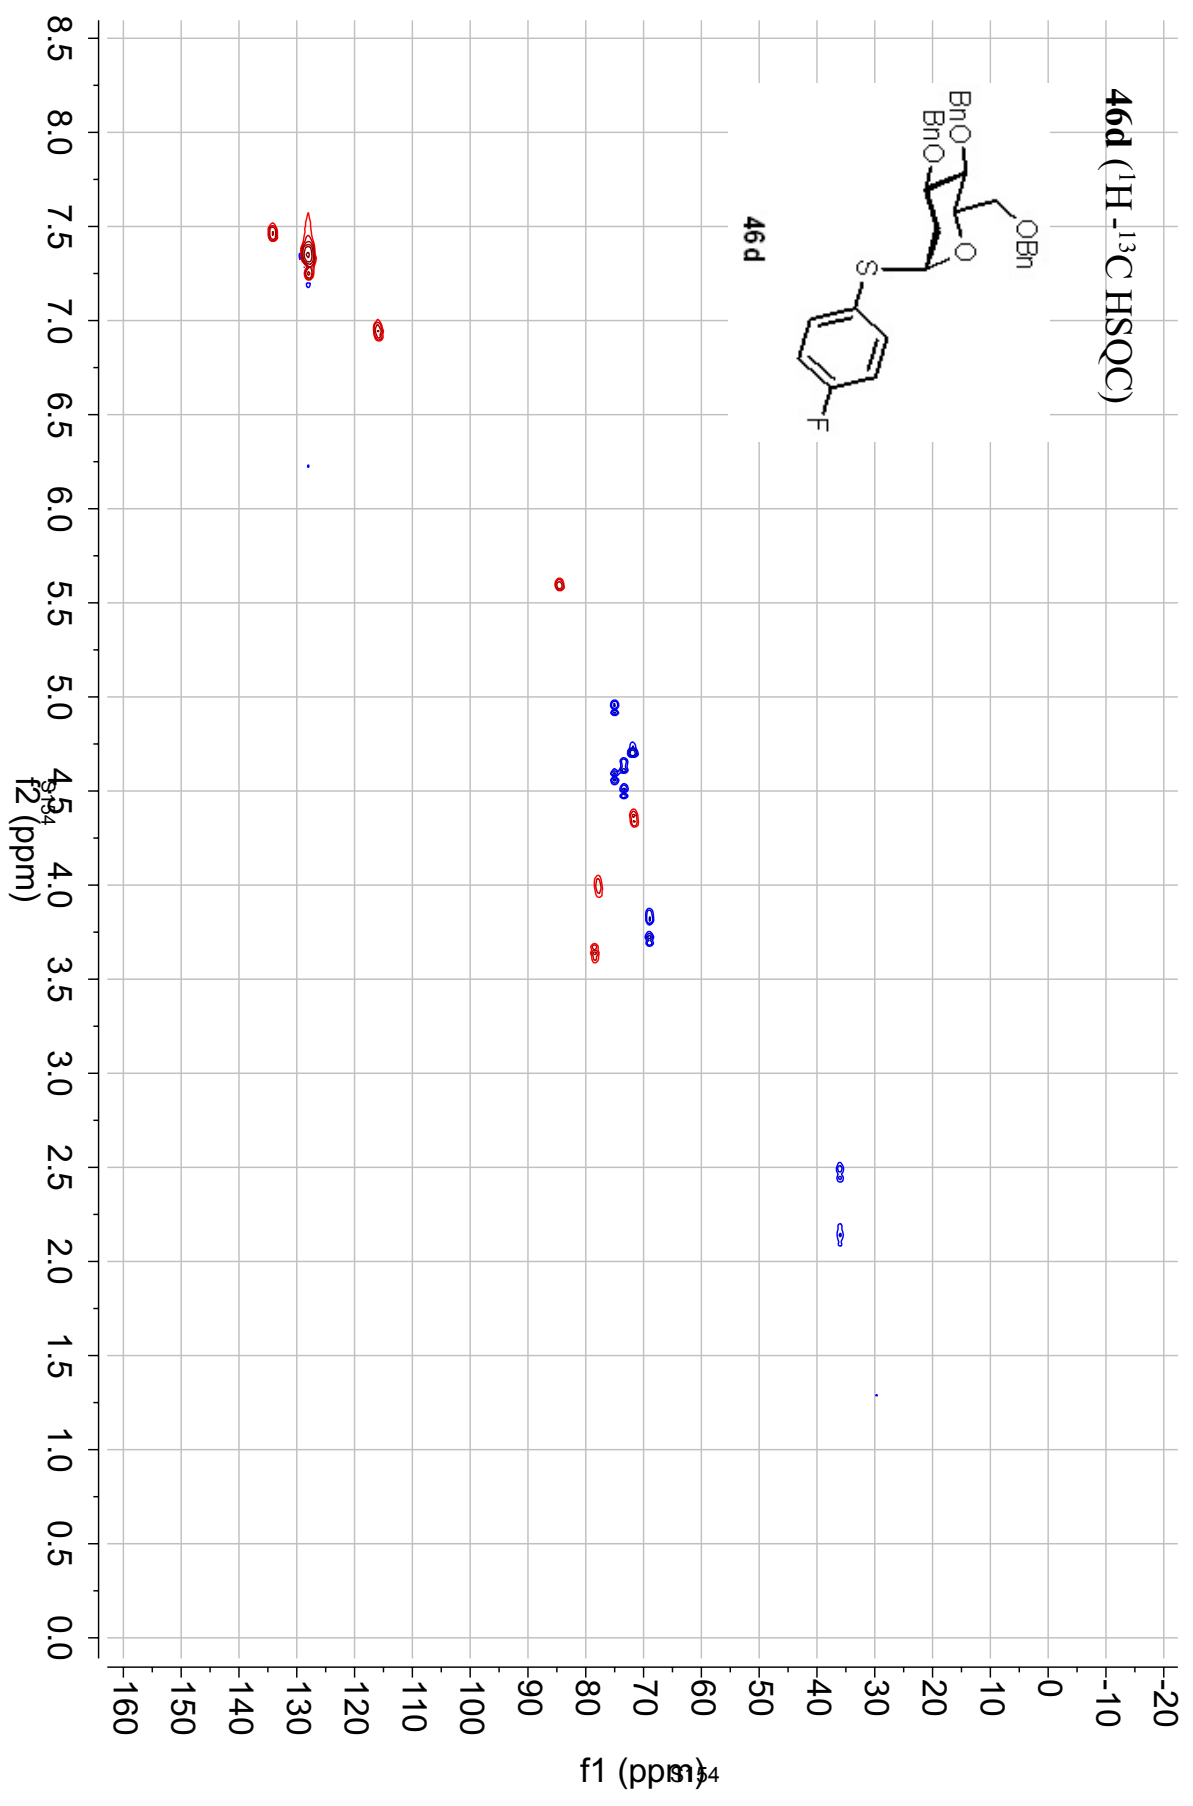

**46d** ( $^{19}\text{F}$  NMR, 282MHz,  $\text{CDCl}_3$ )

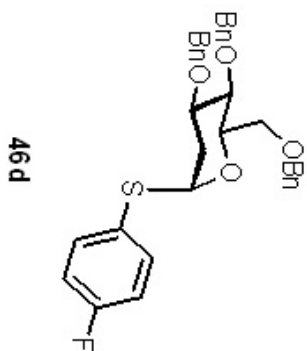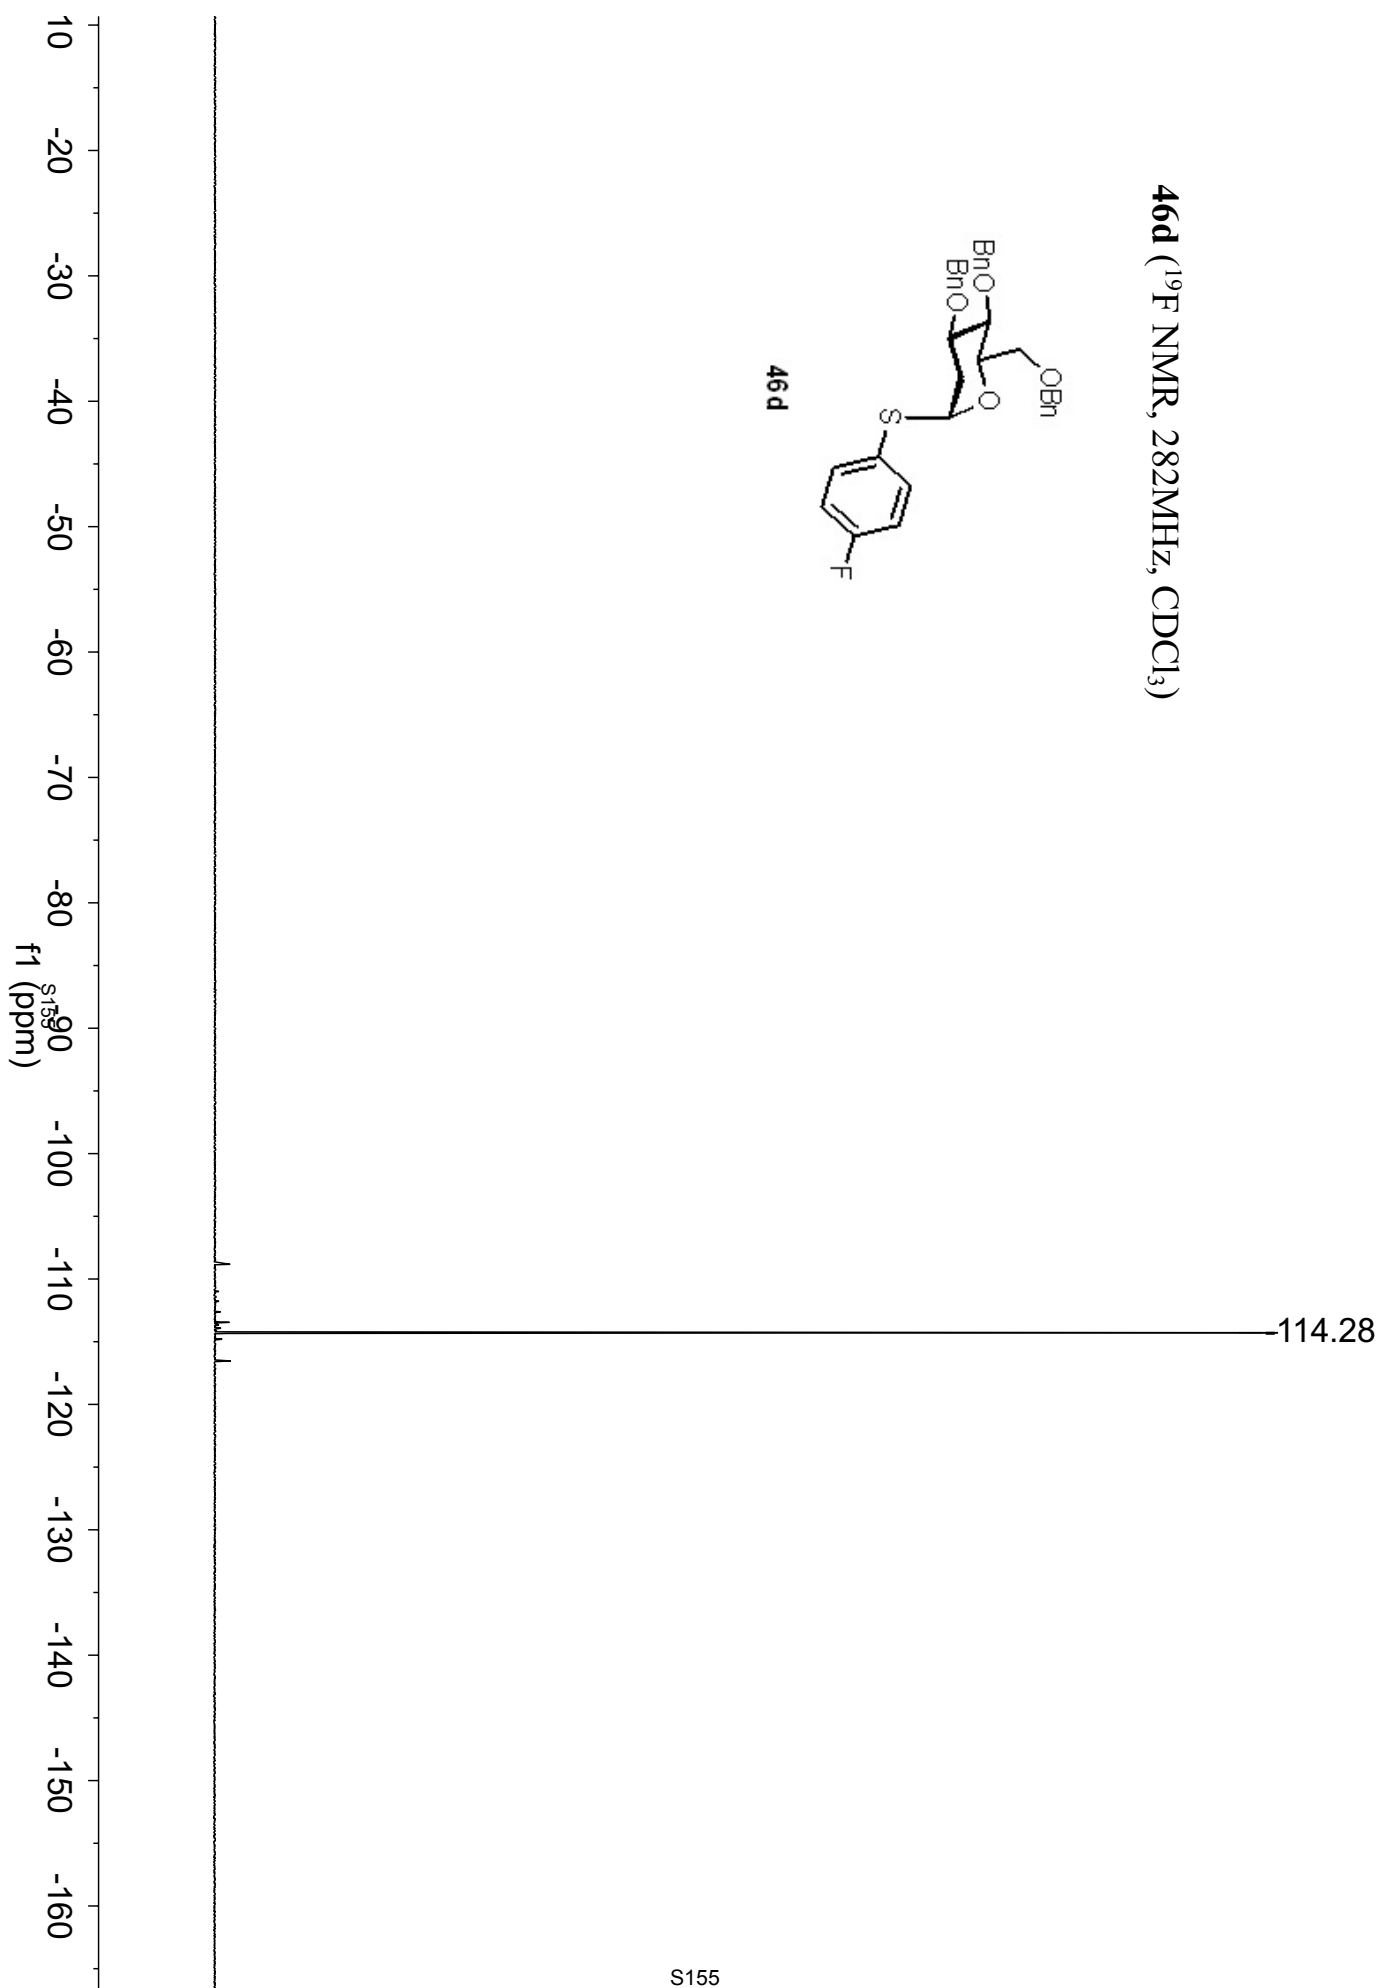

46e (<sup>1</sup>H NMR, 300MHz, CDCl<sub>3</sub>)

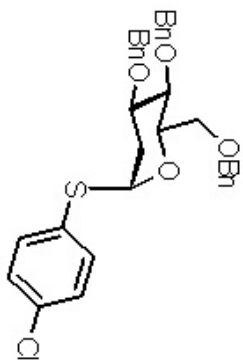

46e

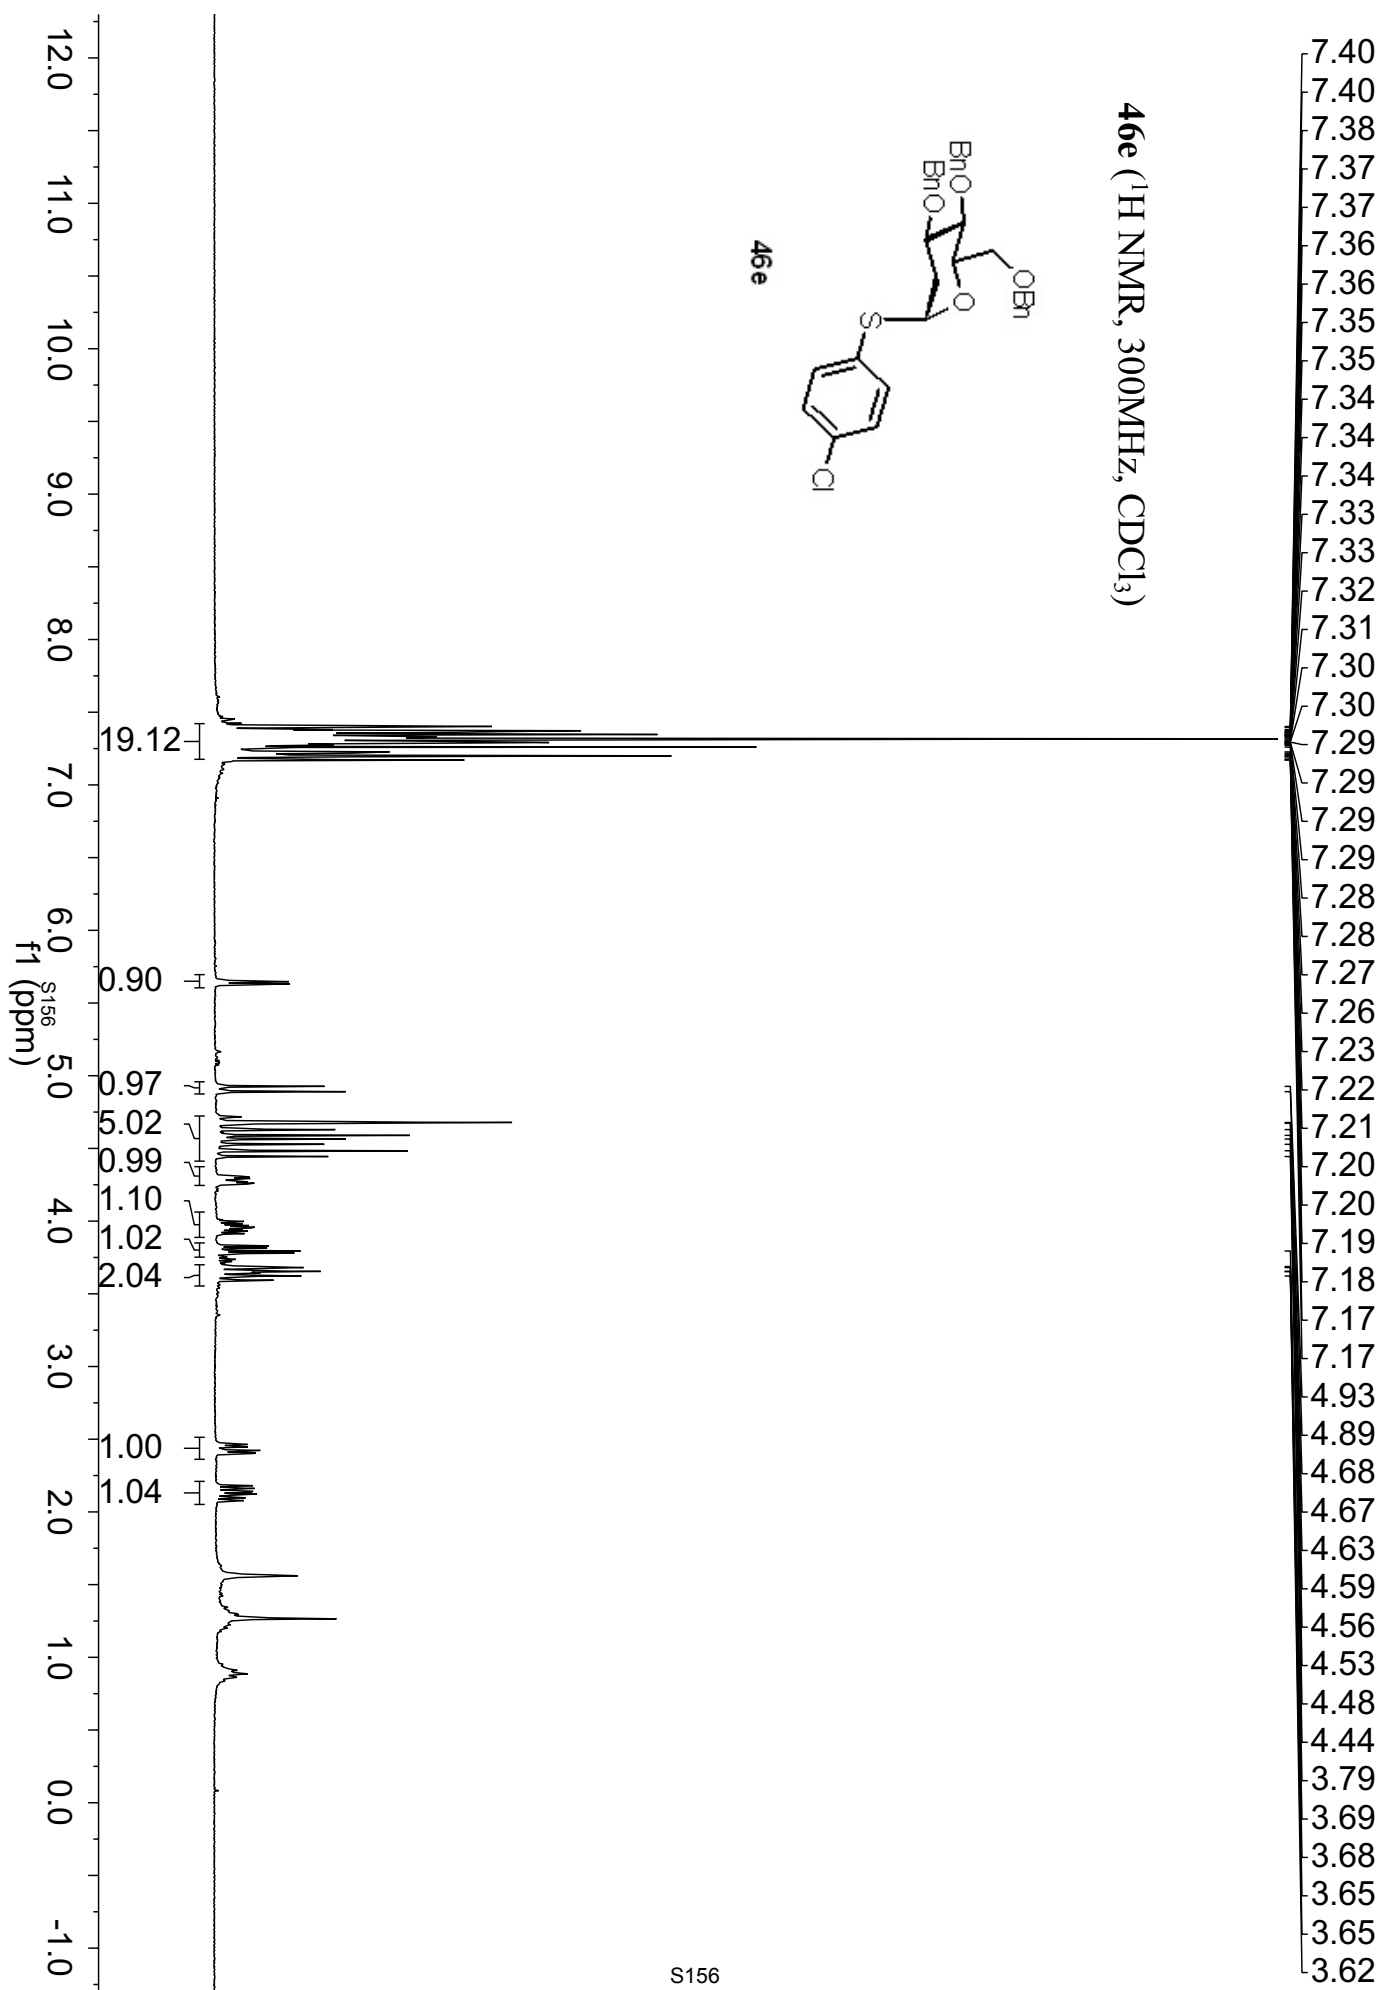

46e (<sup>13</sup>C NMR, 75MHz, CDCl<sub>3</sub>)

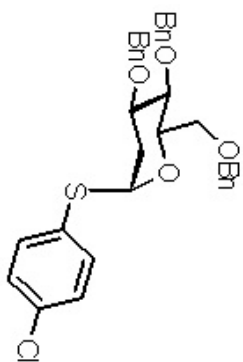

46e

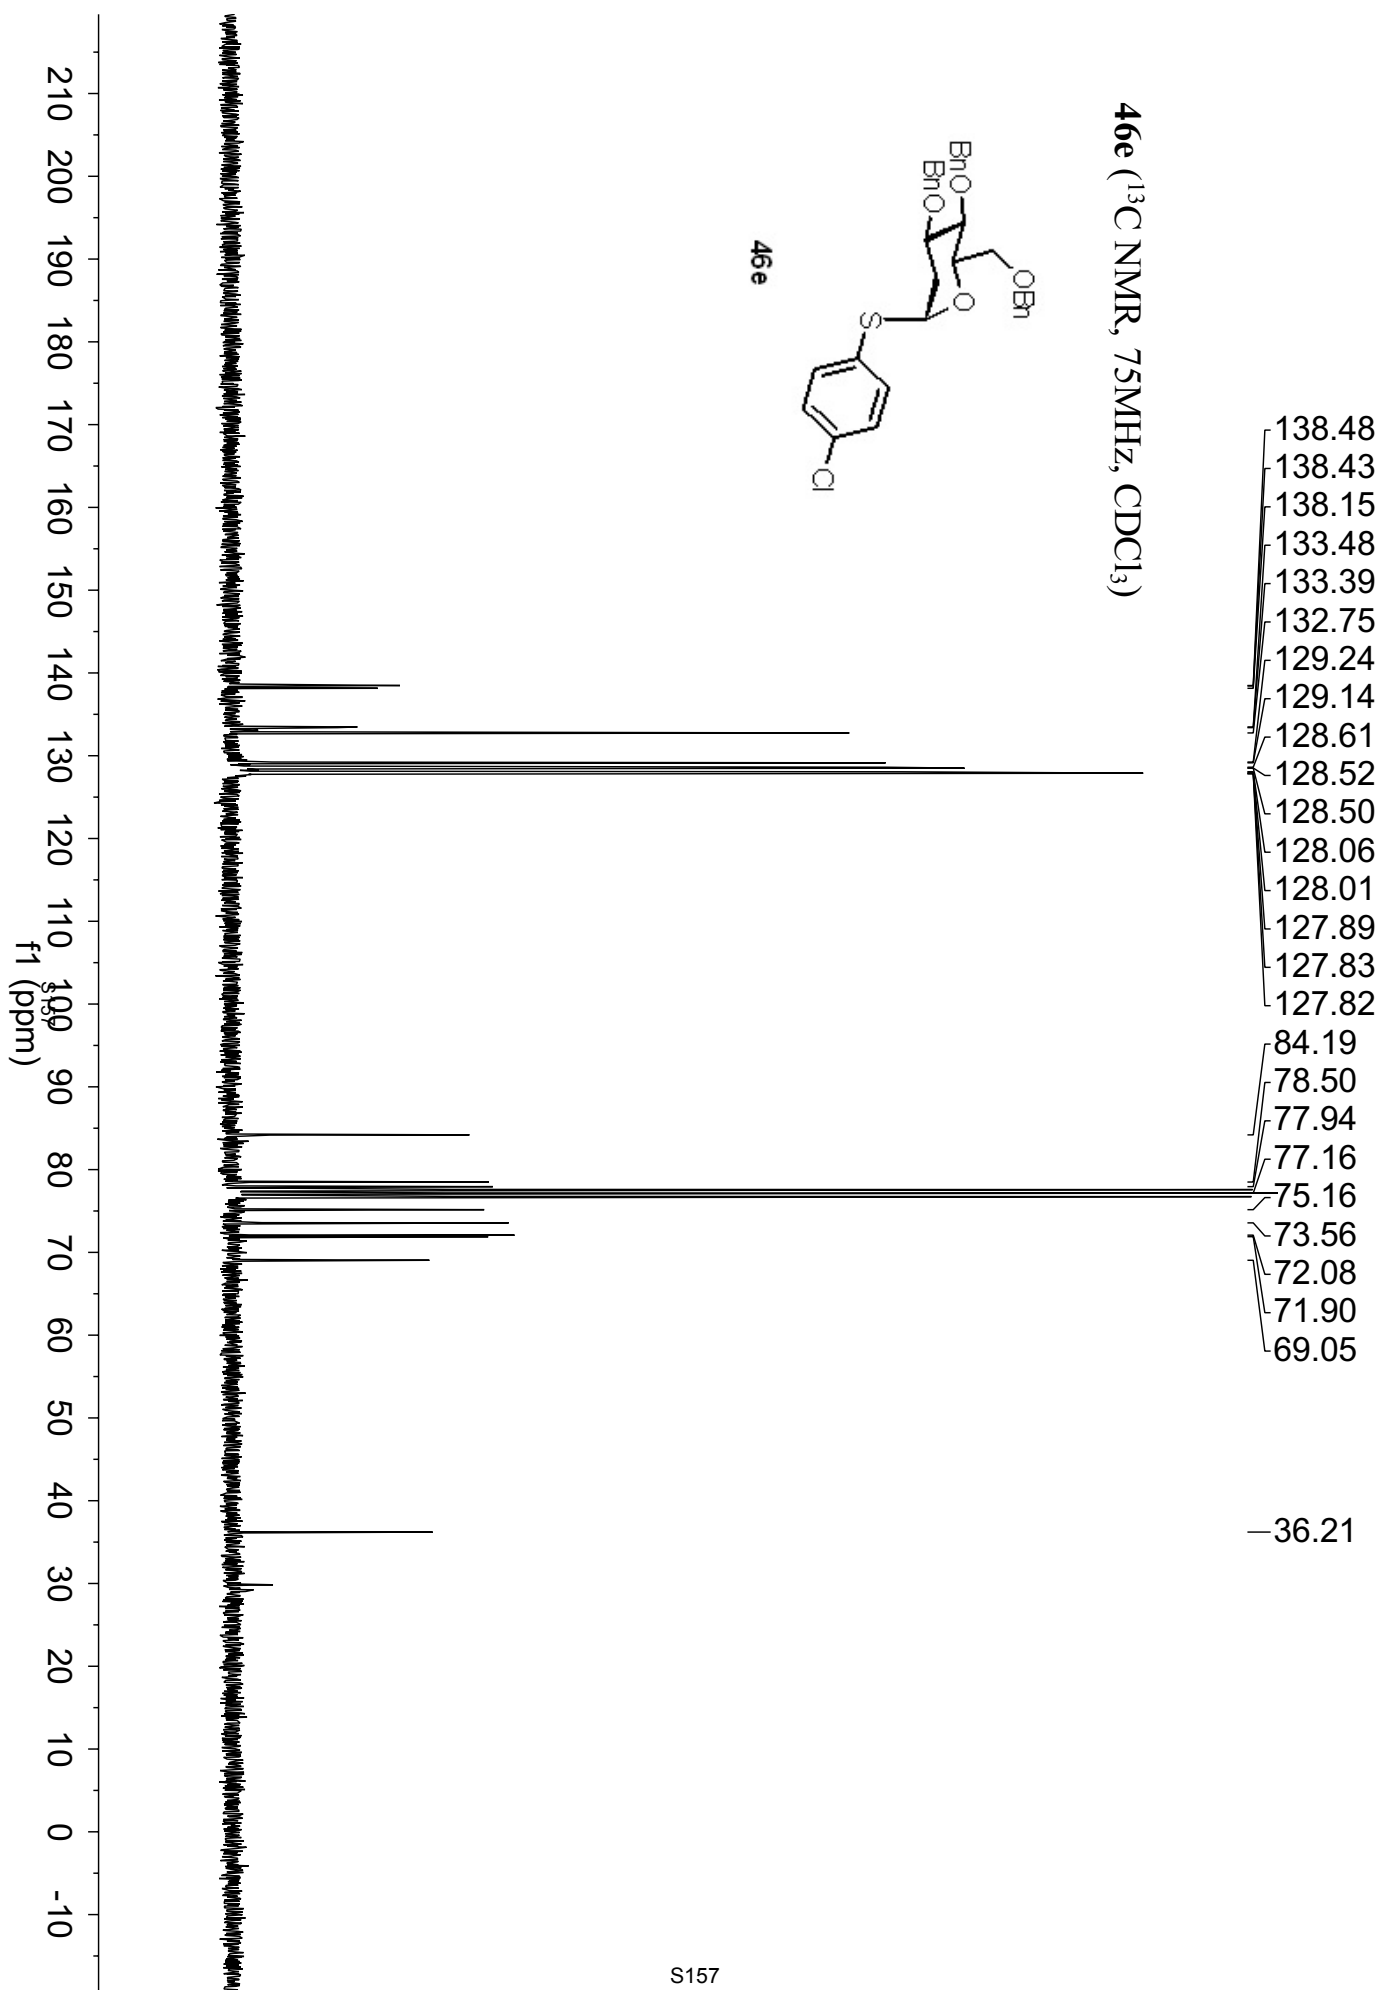

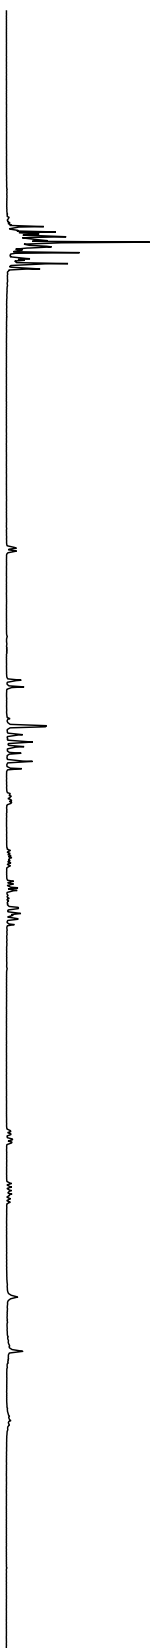

46e (<sup>1</sup>H-<sup>13</sup>C Coupled HSQC)

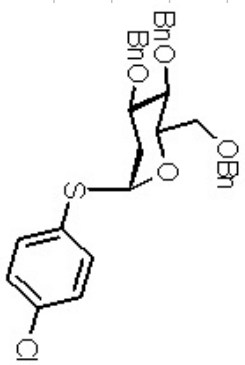

46e

$J = 169 \text{ Hz}$

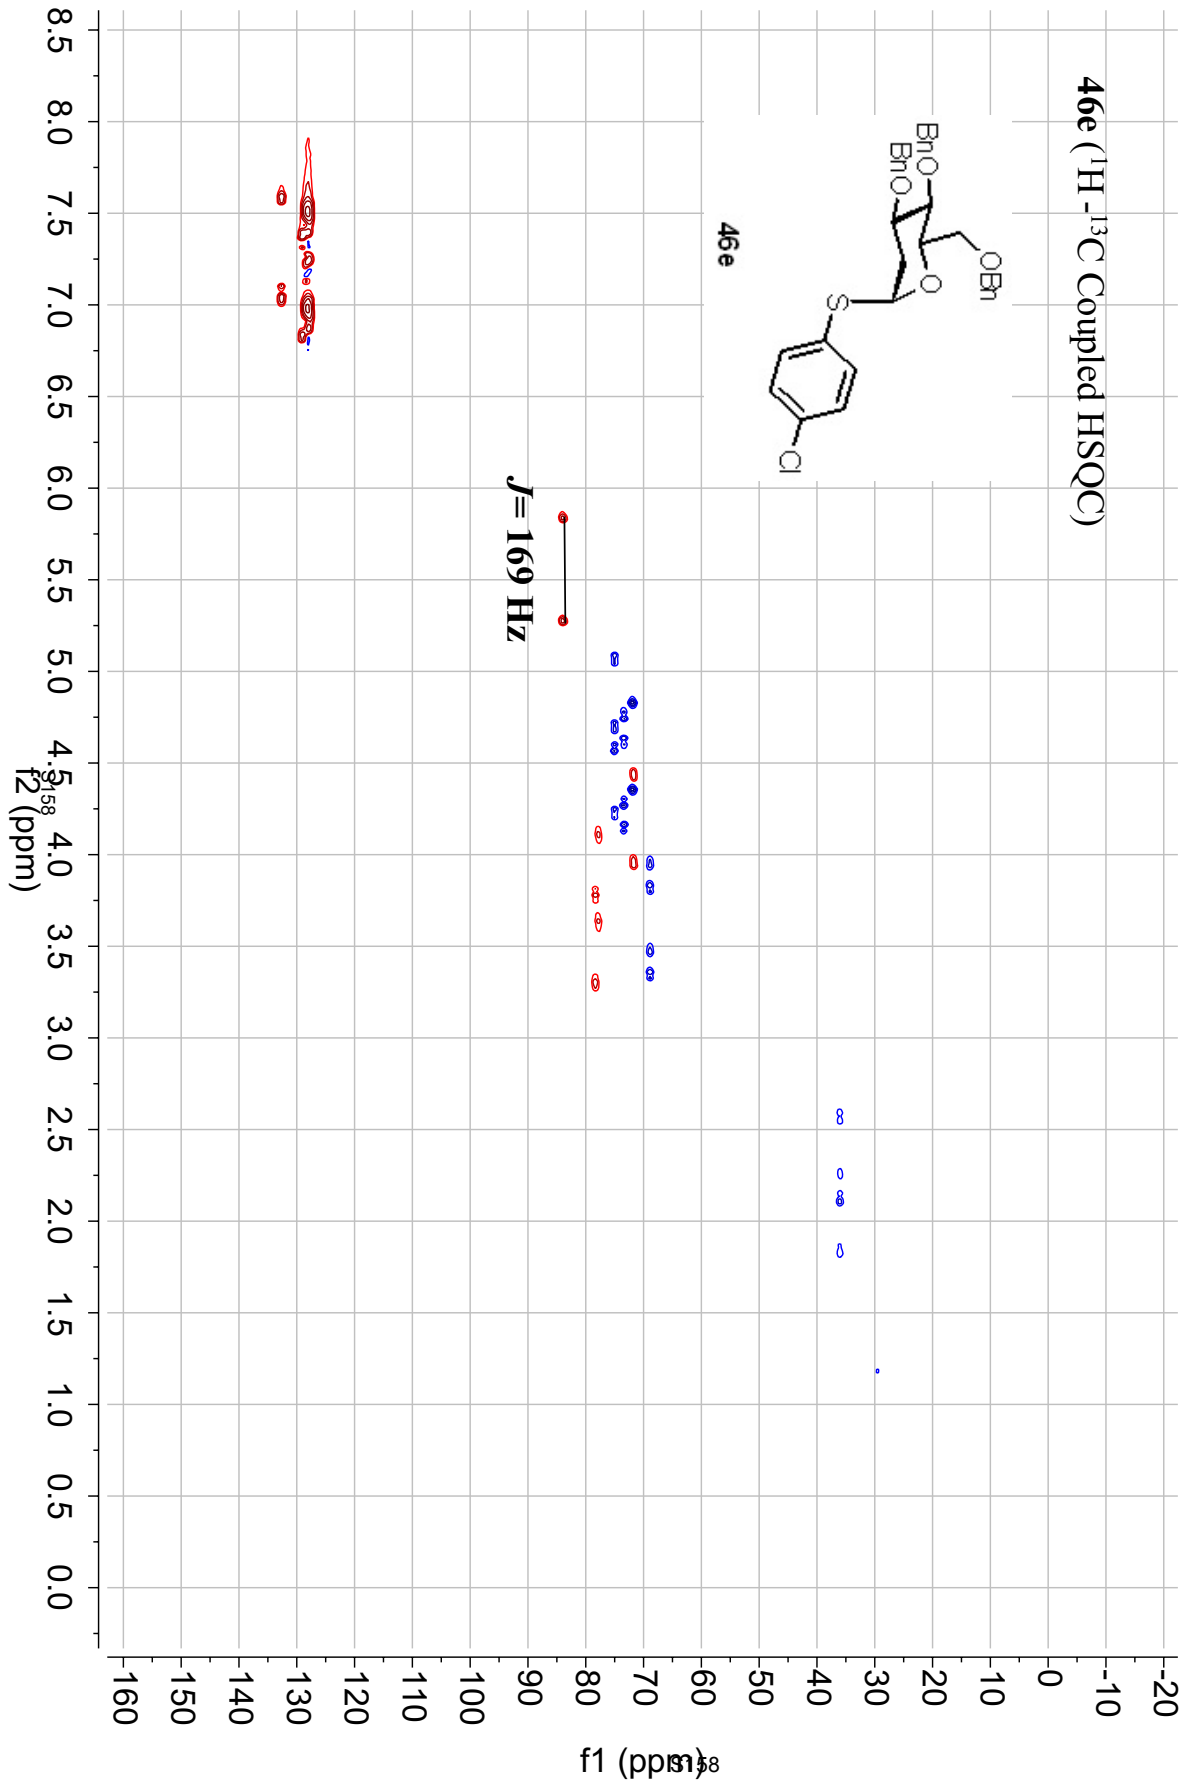



46e ( $^1\text{H}$ - $^{13}\text{C}$ HSQC)

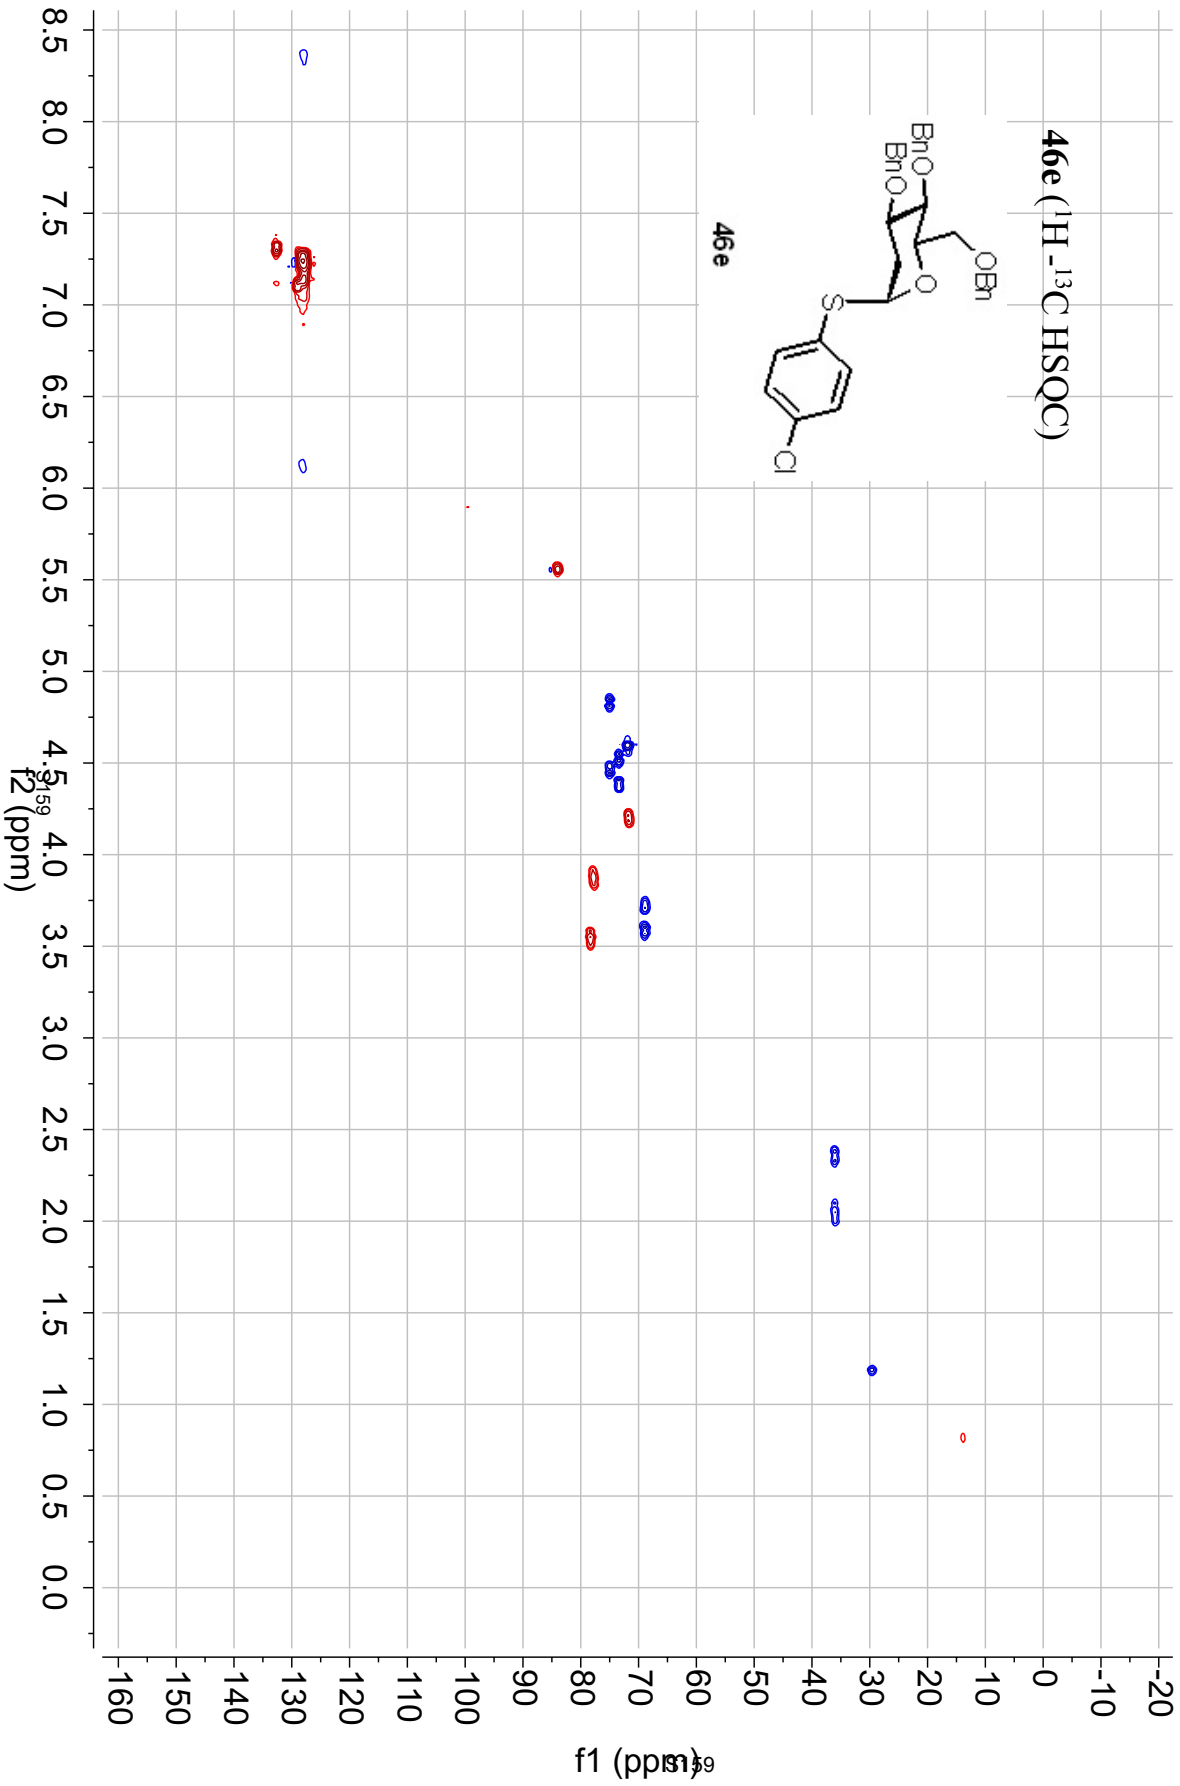

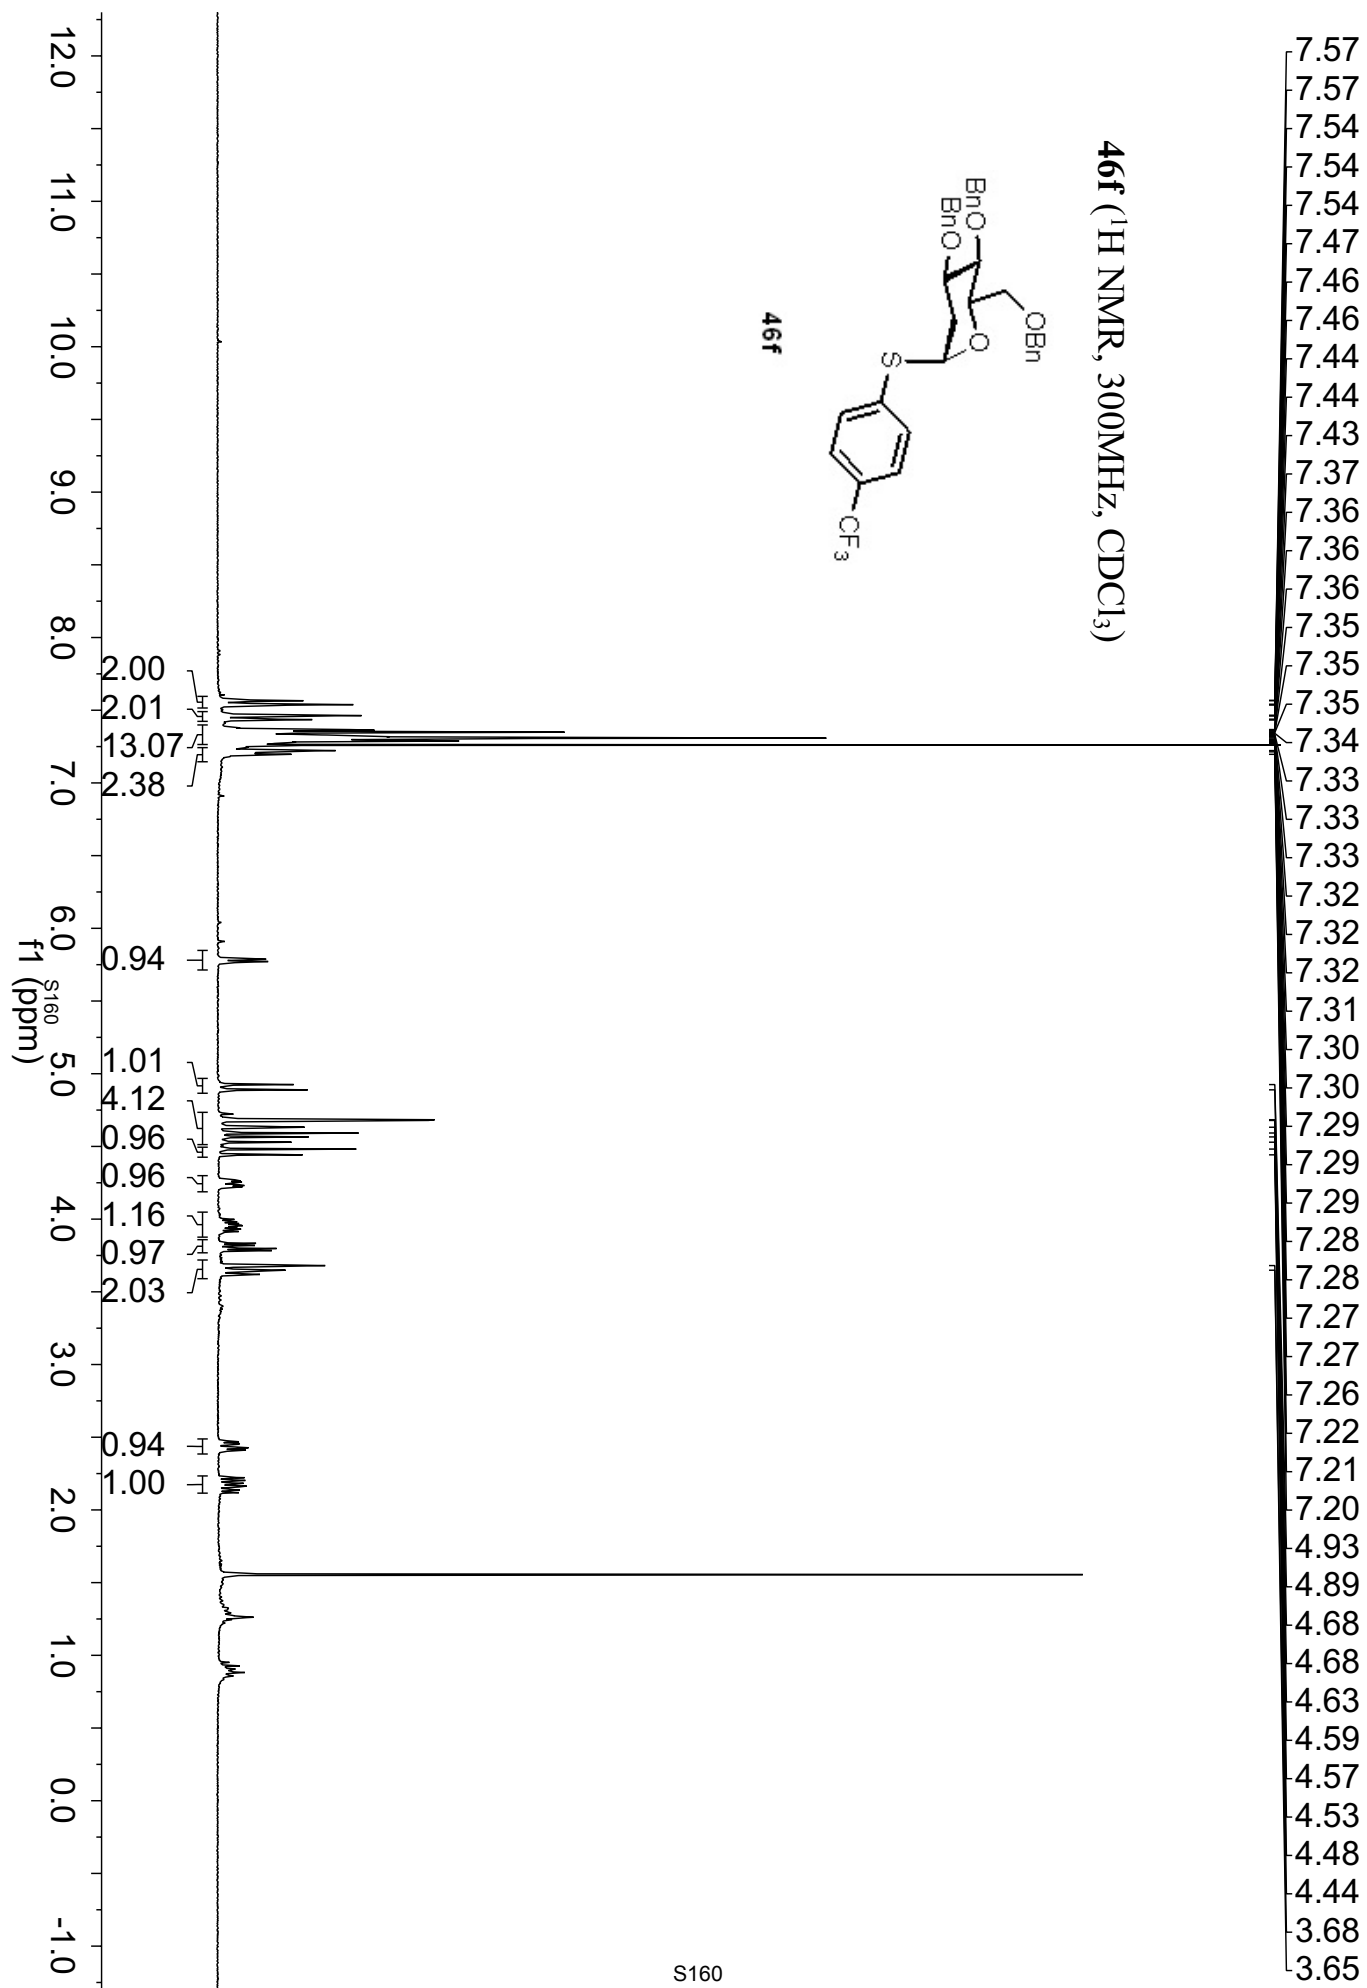



**46f** ( $^{13}\text{C}$  NMR, 75MHz,  $\text{CDCl}_3$ )

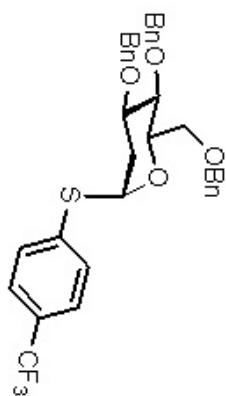

**46f**

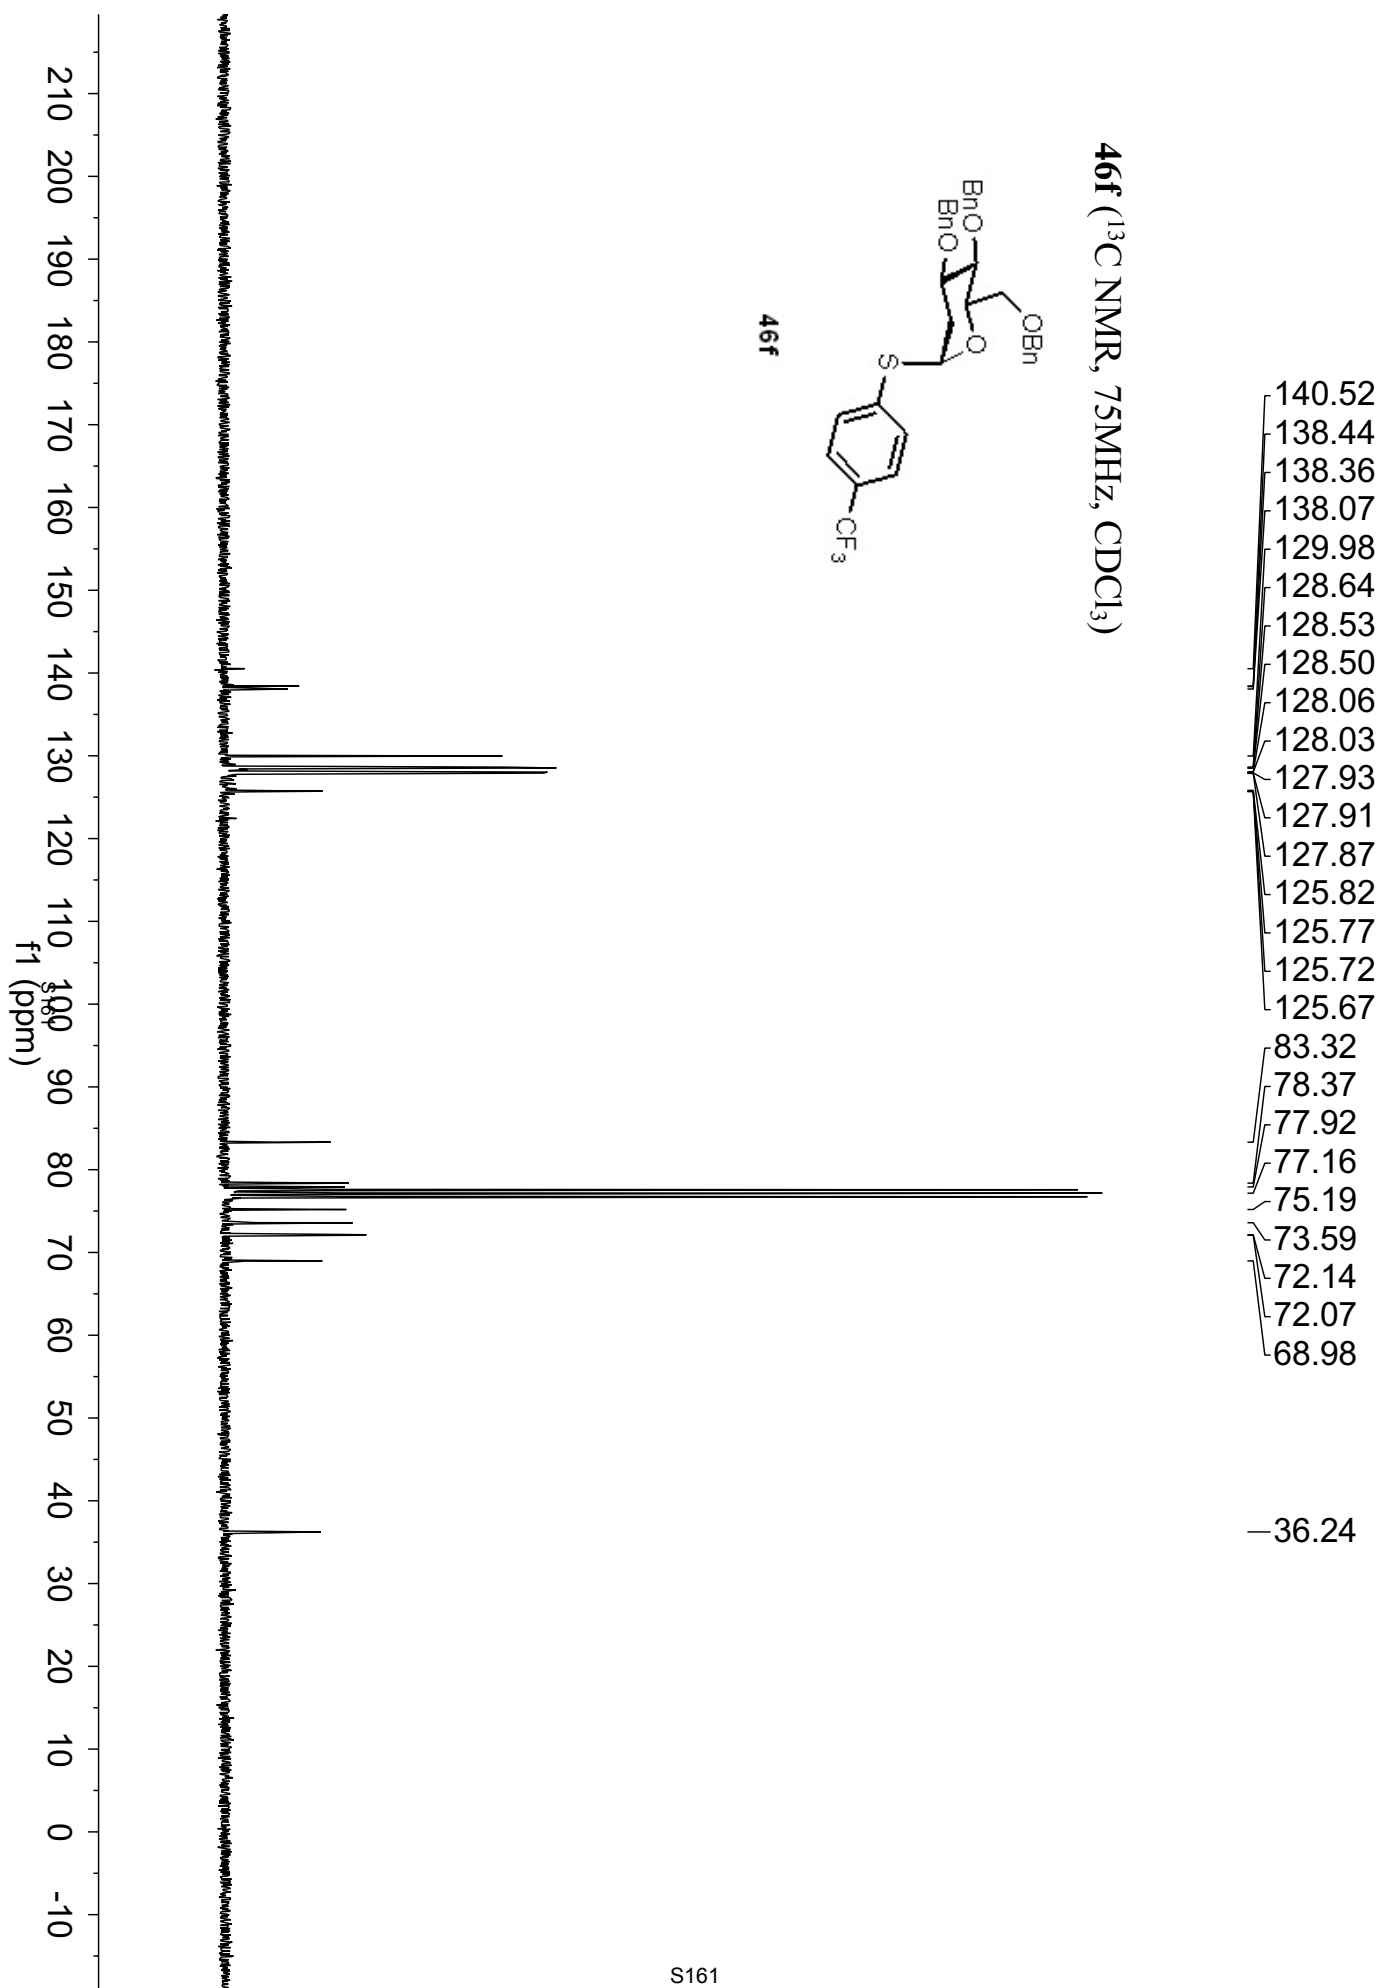

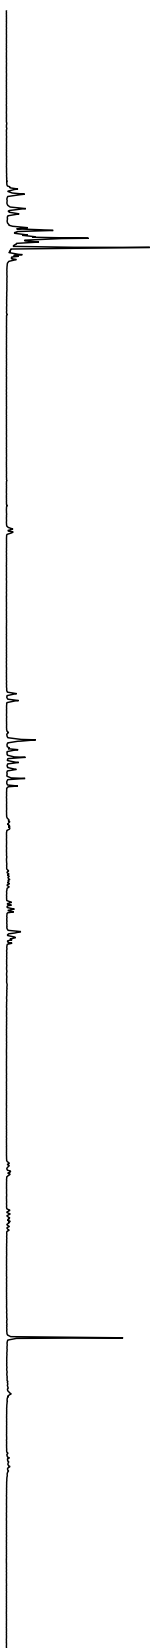

**46f** ( $^1\text{H}$ - $^{13}\text{C}$  Coupled HSQC)

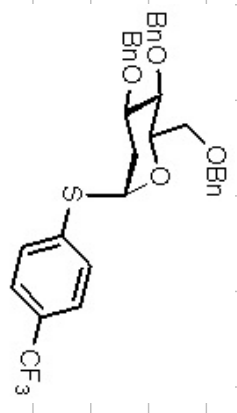

46f

$J = 169 \text{ Hz}$

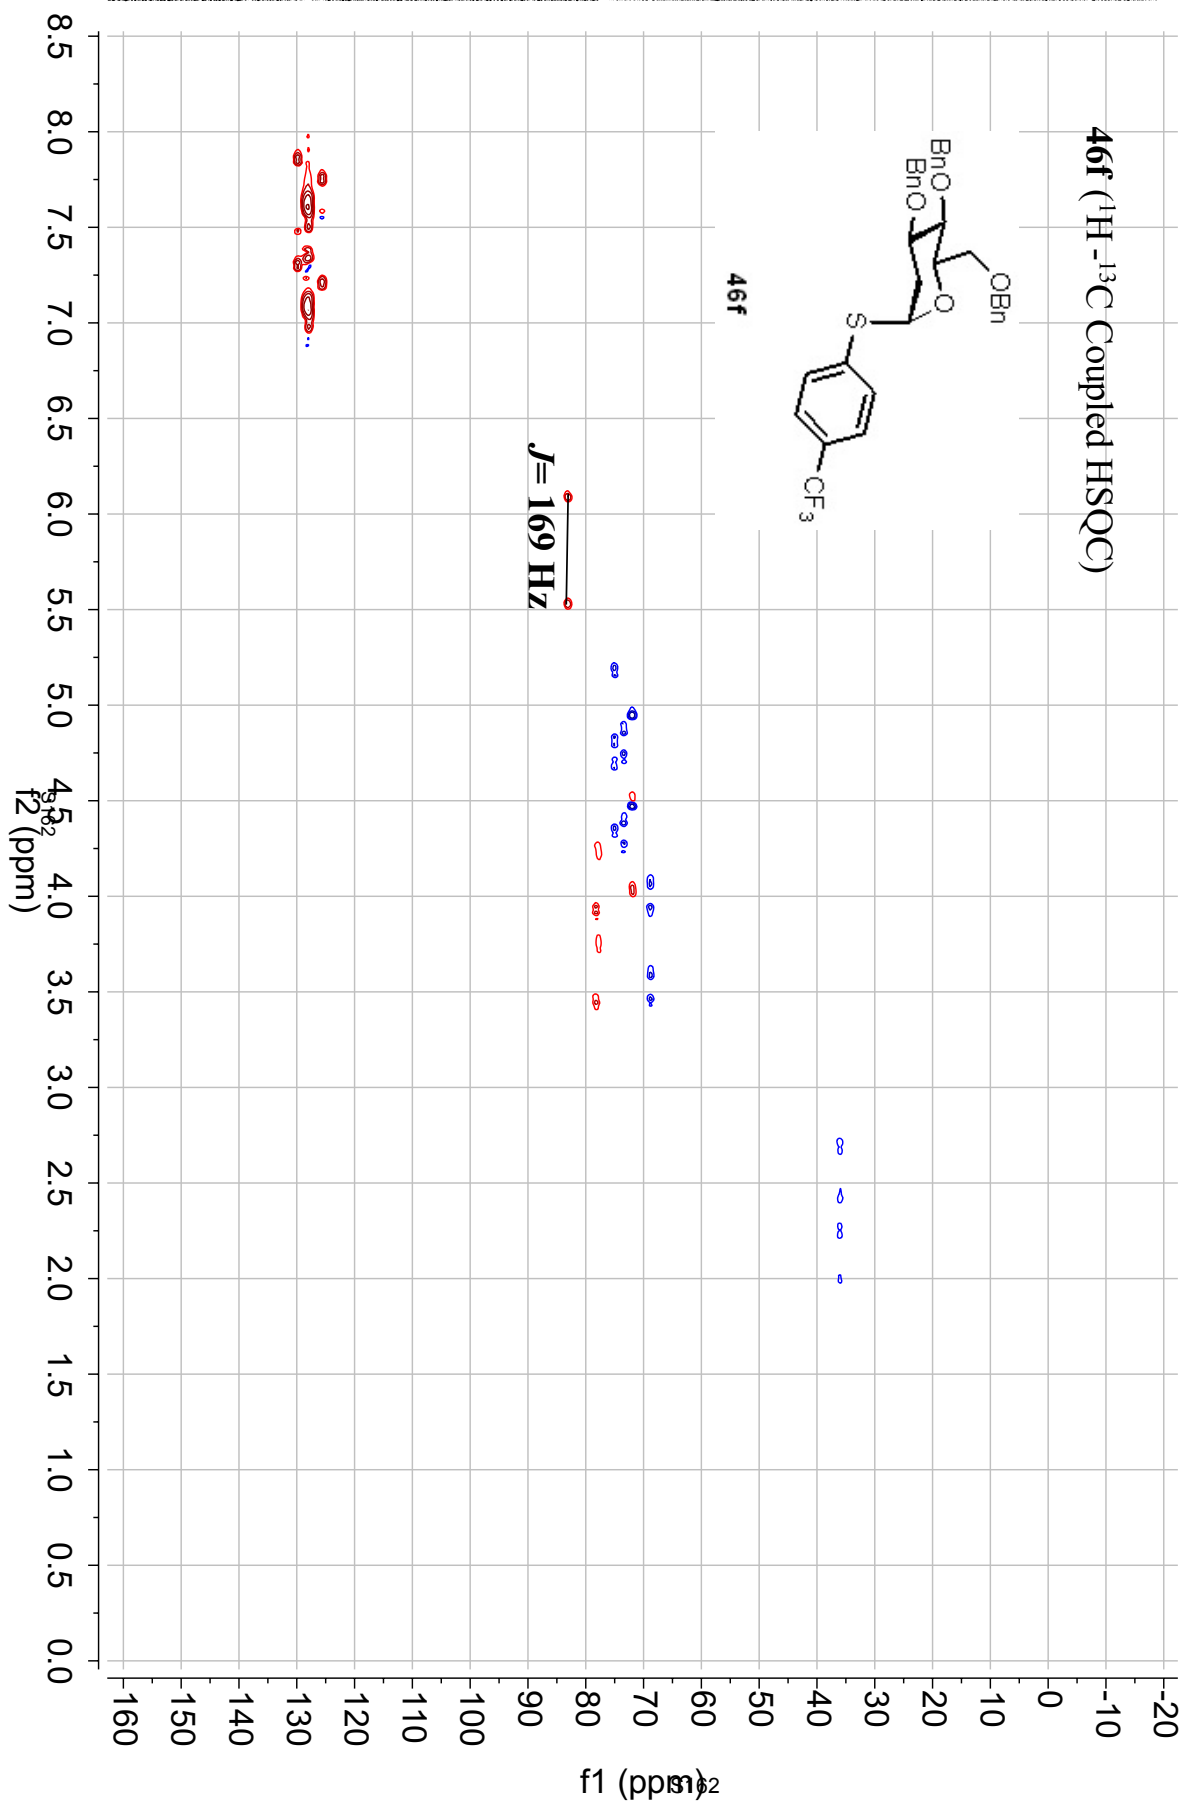

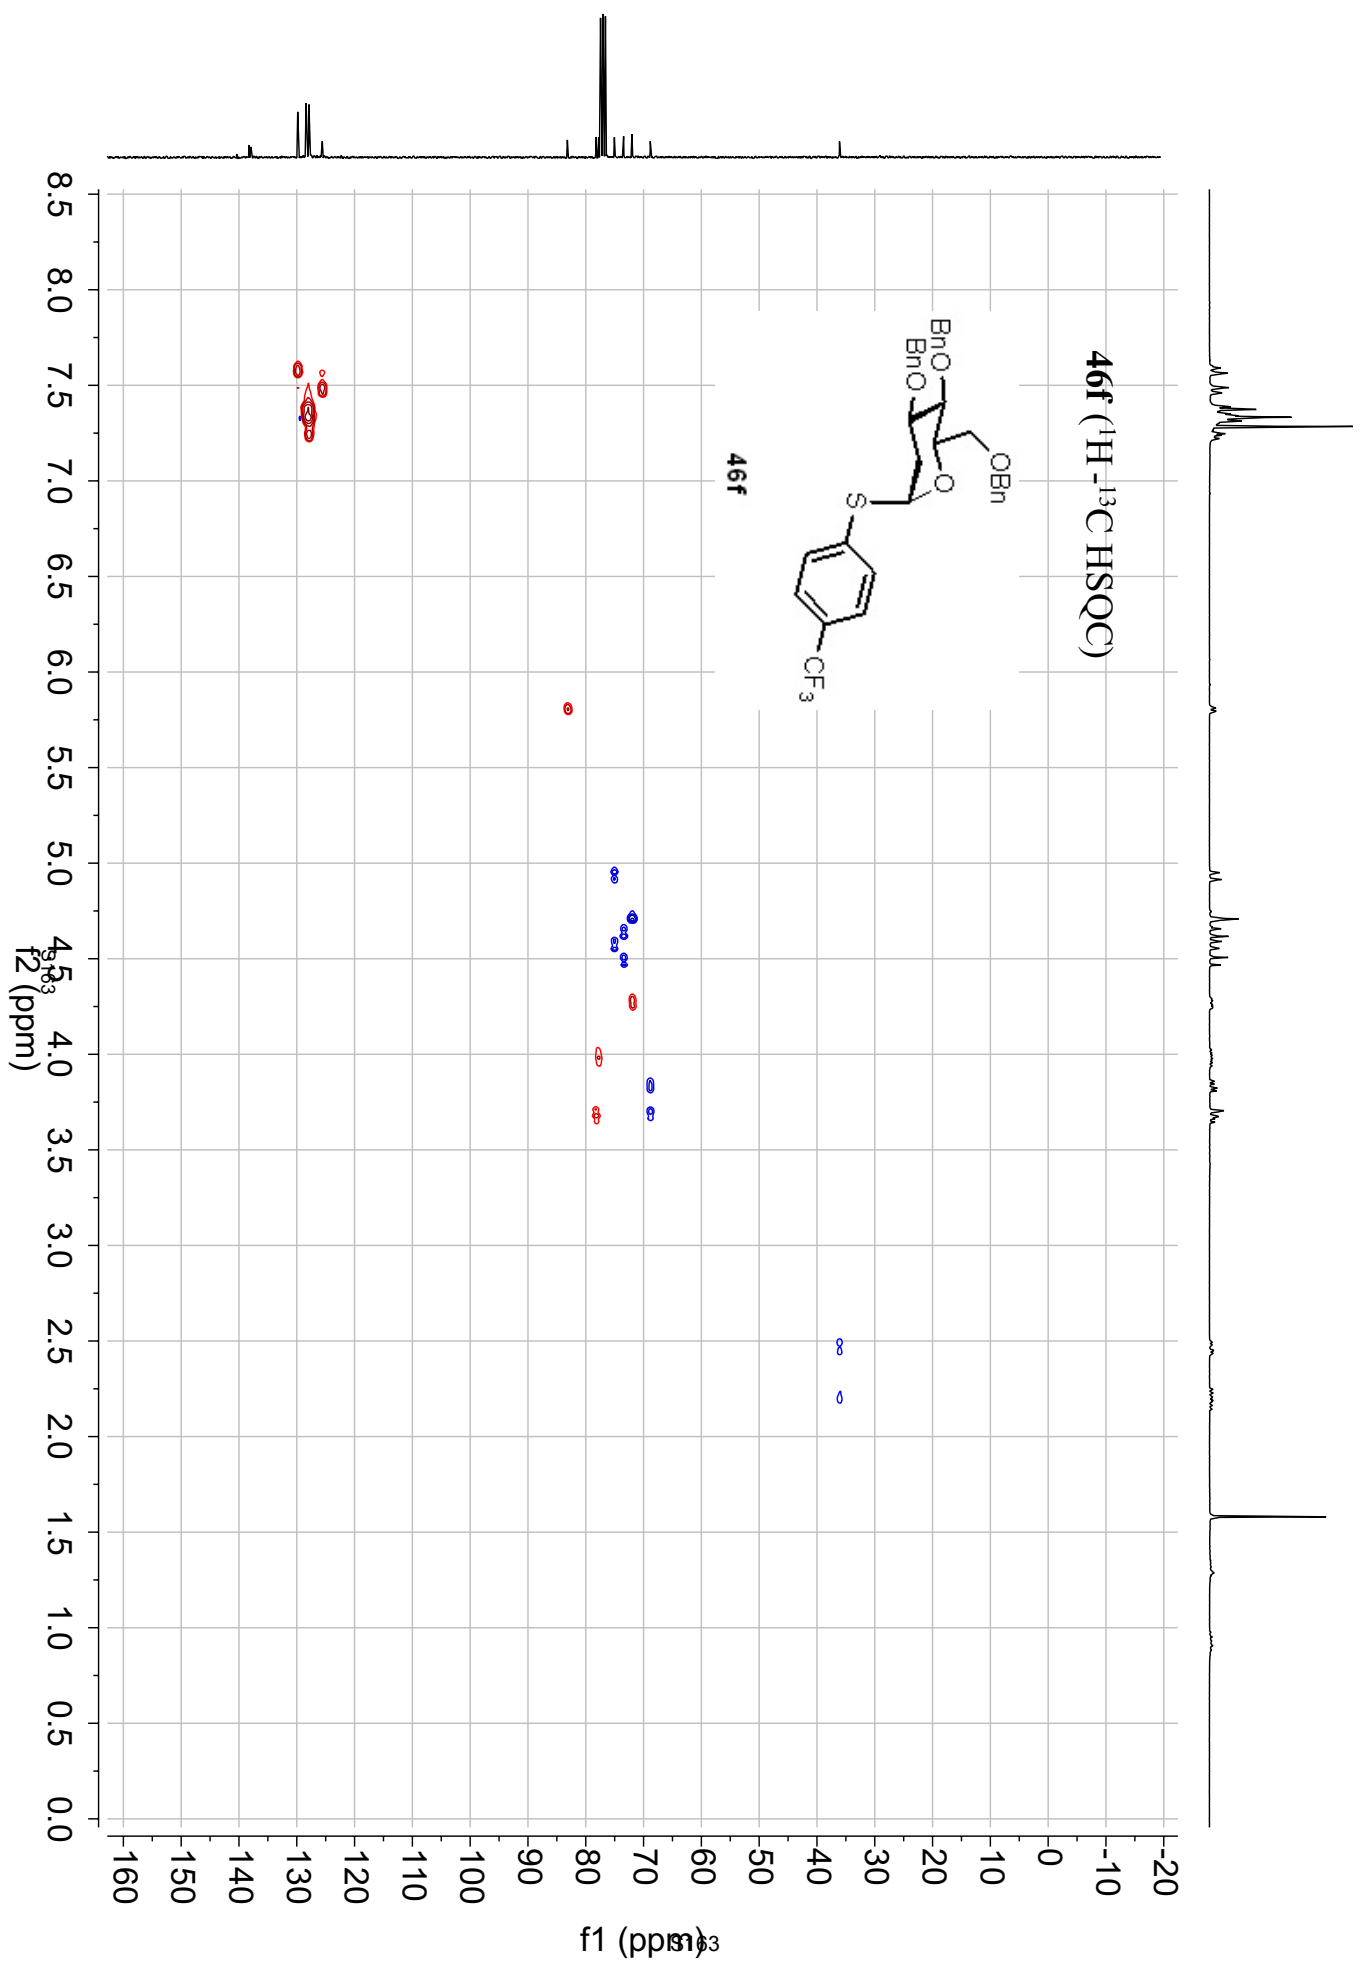

**46f** ( $^{19}\text{F}$  NMR, 282MHz,  $\text{CDCl}_3$ )

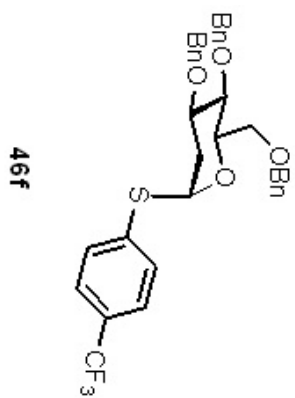

**46f**

-62.56

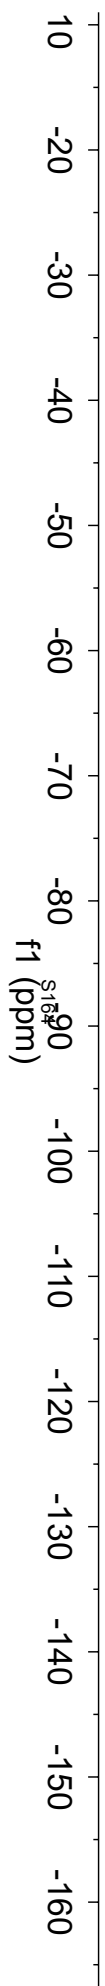

47a (<sup>1</sup>H NMR, 300MHz, CDCl<sub>3</sub>)

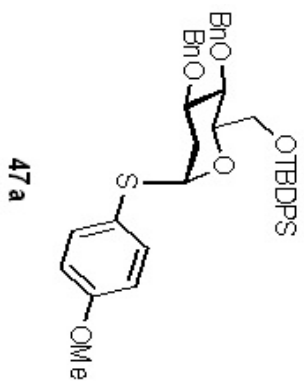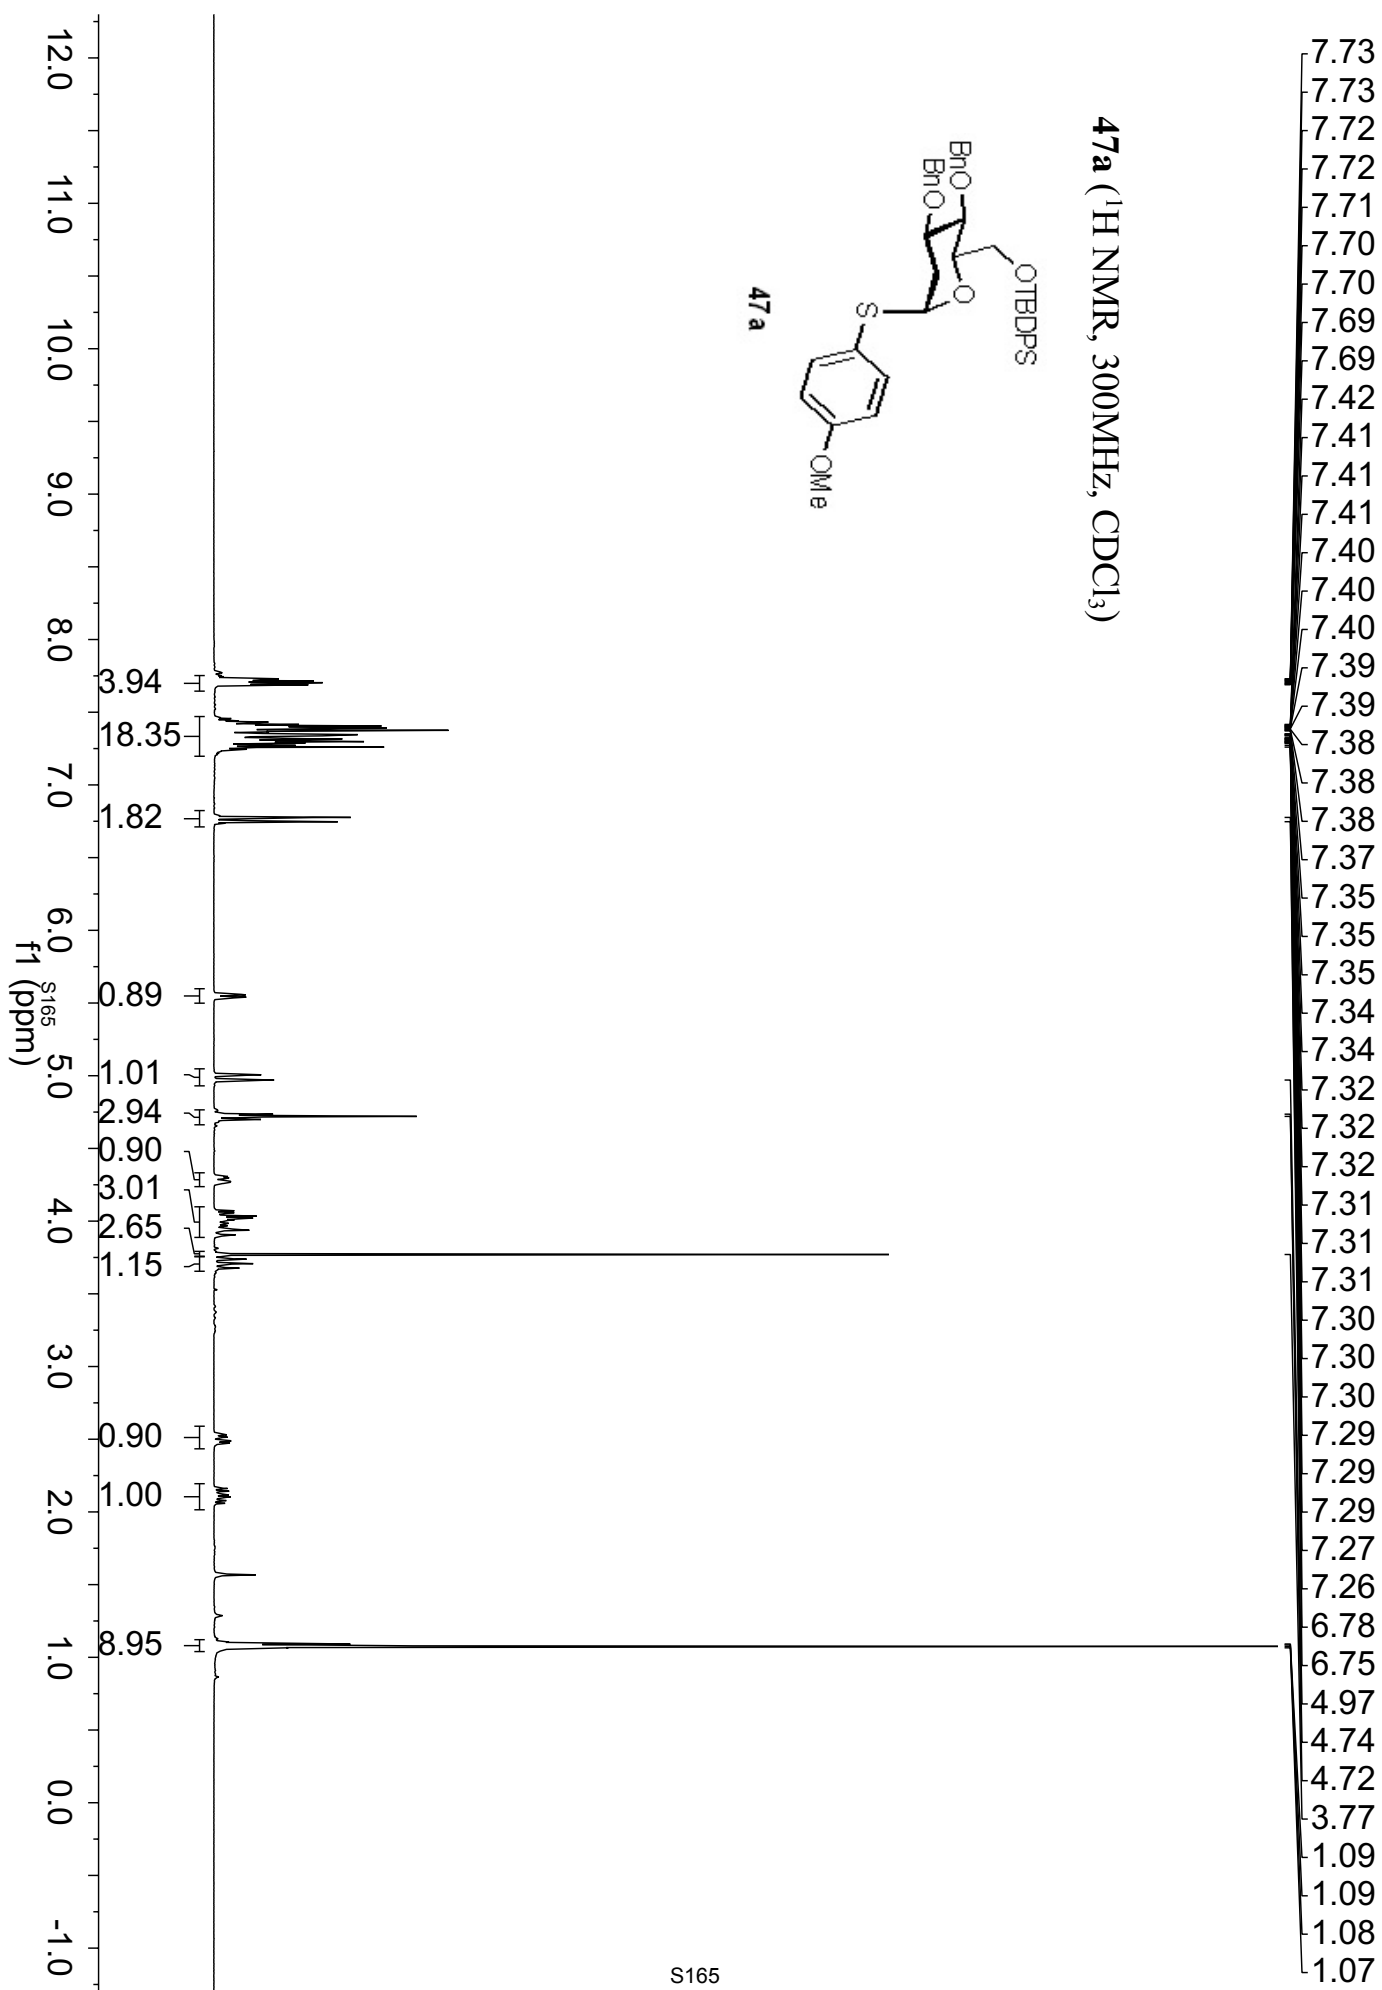

**47a** ( $^{13}\text{C}$  NMR, 75MHz,  $\text{CDCl}_3$ )

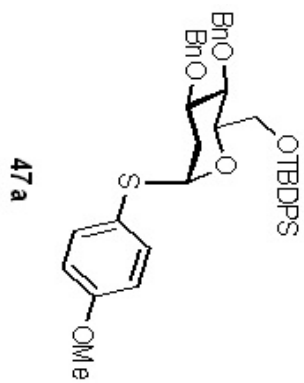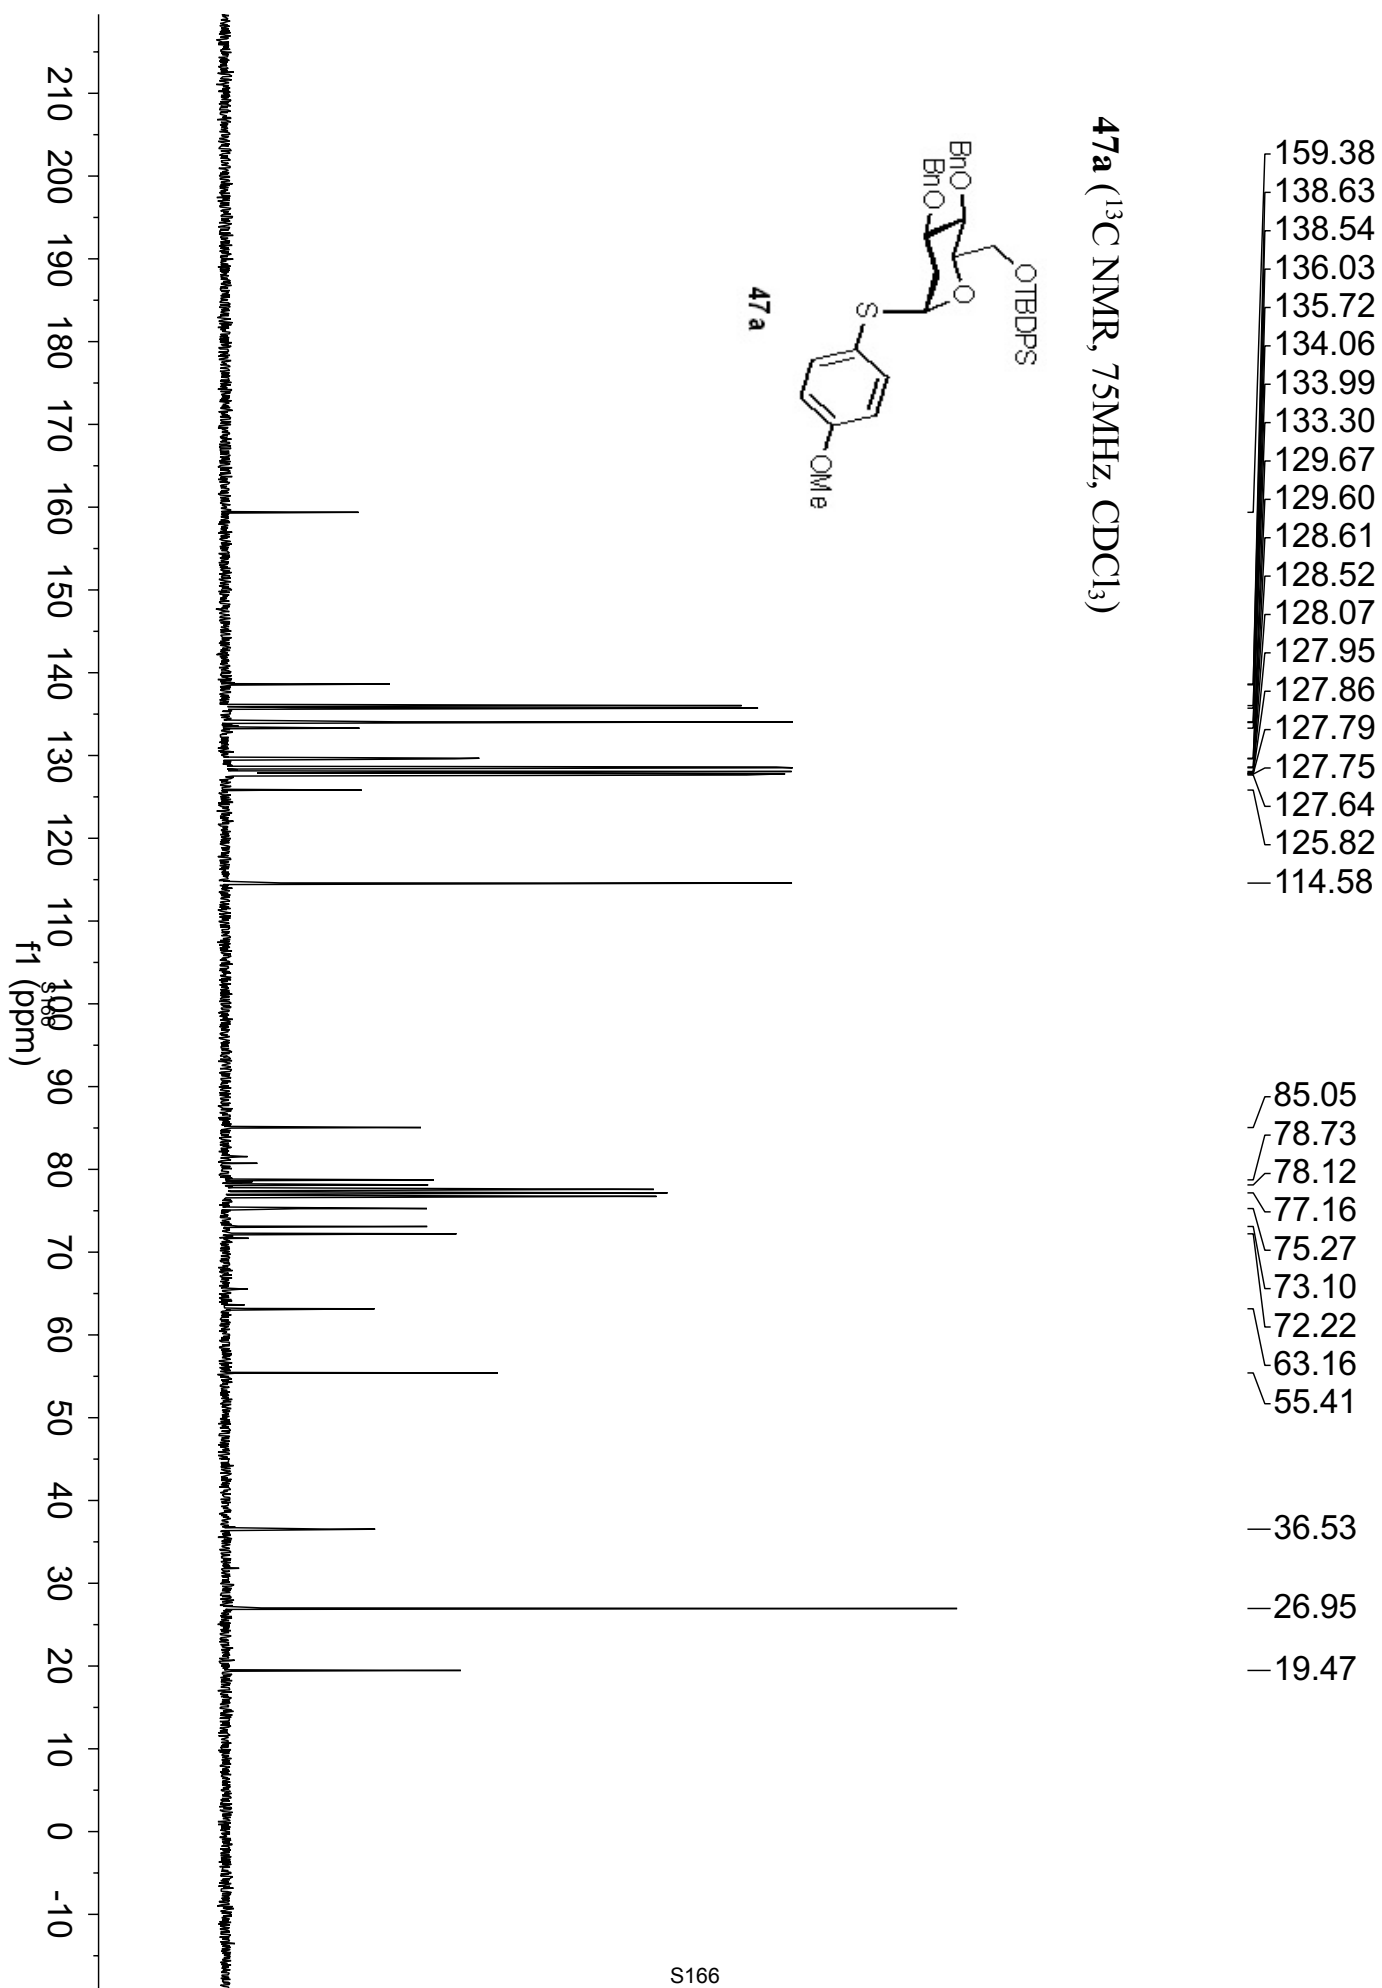

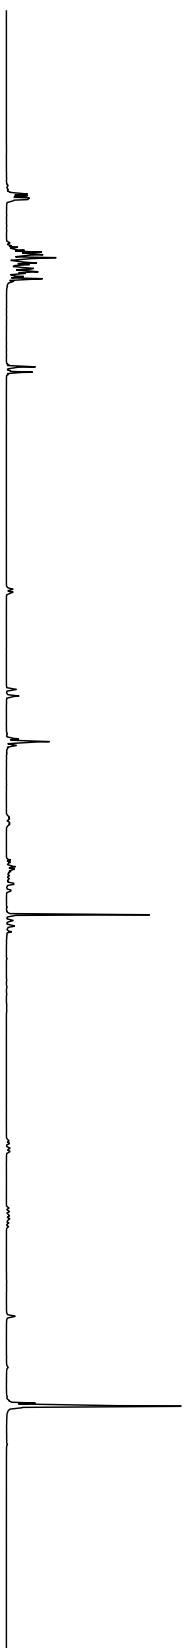

**47a** ( $^1\text{H}$ - $^{13}\text{C}$  Coupled HSQC)

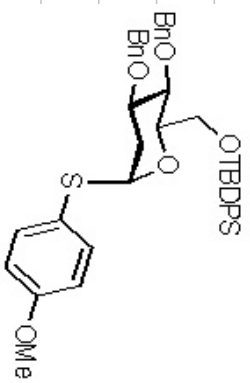

47a

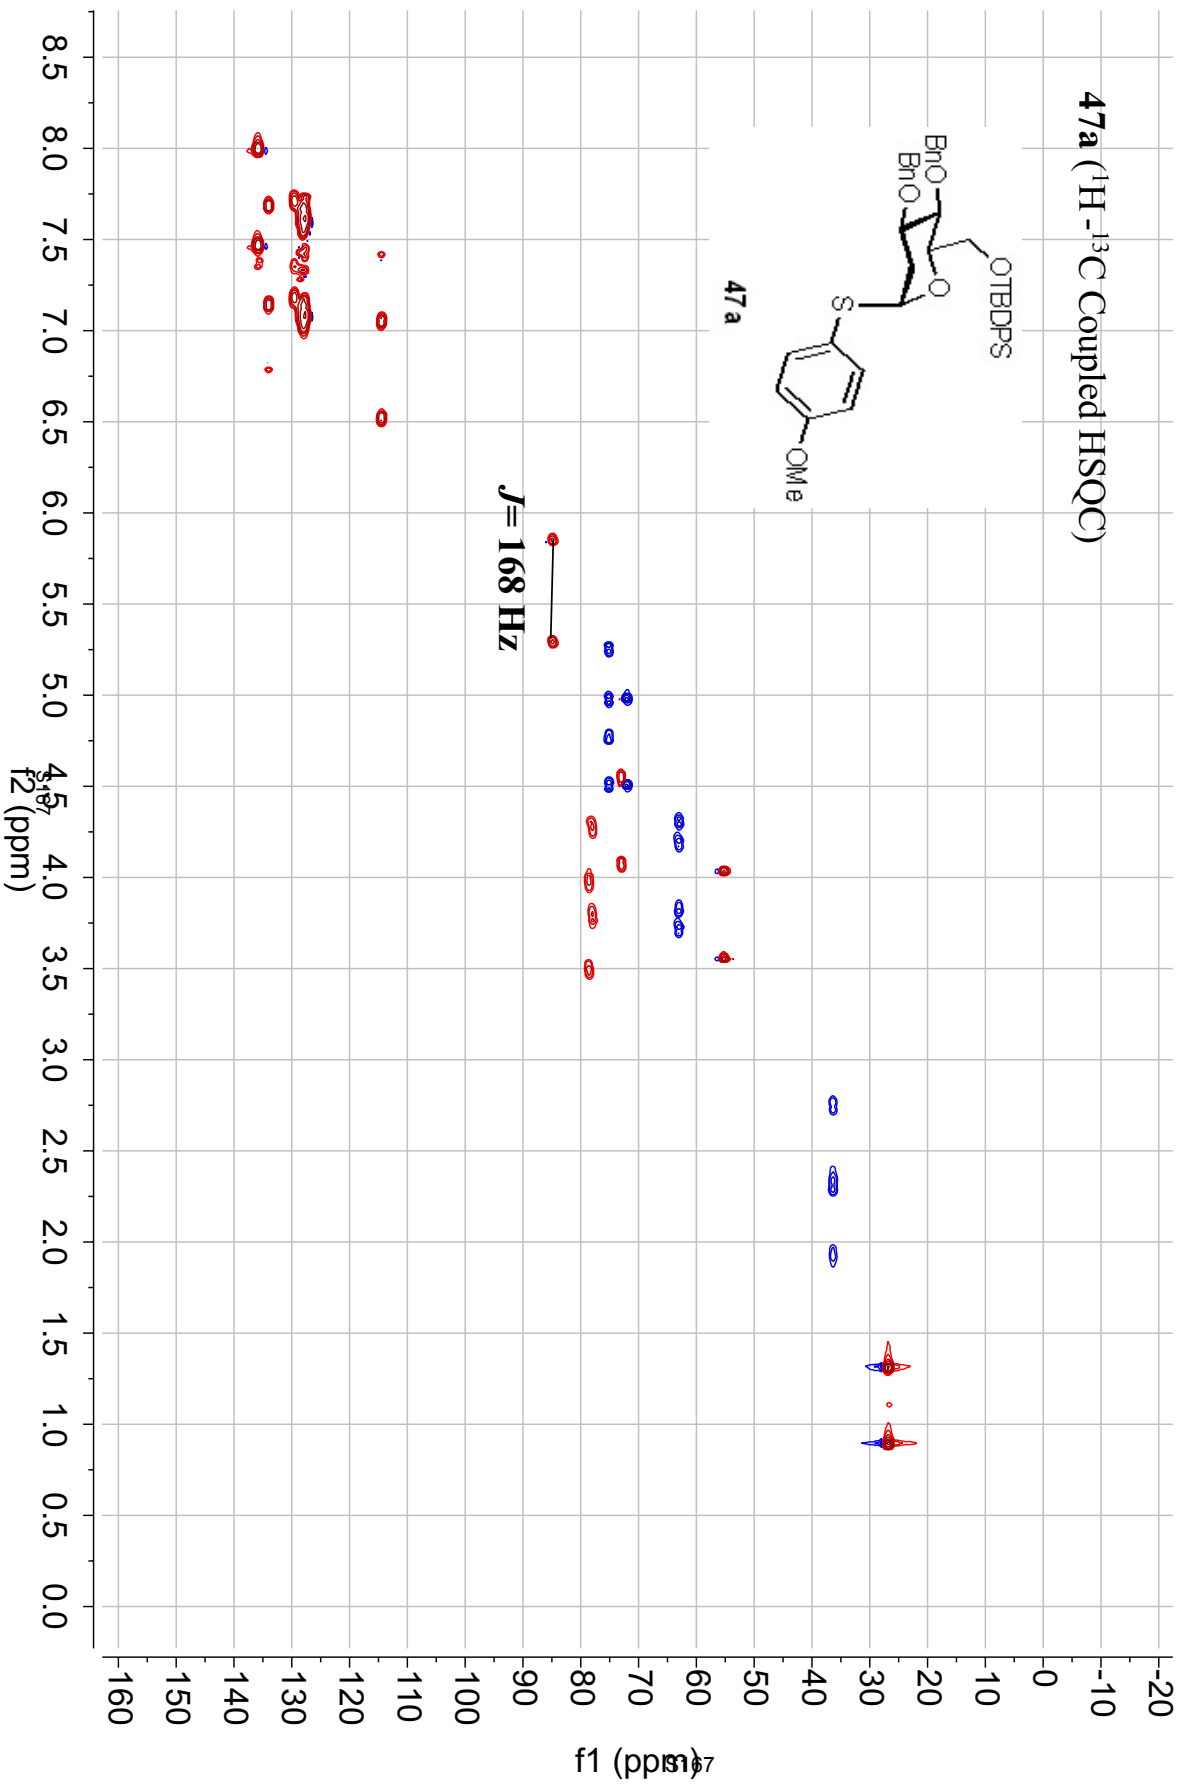



**47a** ( $^1\text{H}$ - $^{13}\text{C}$  HSQC)

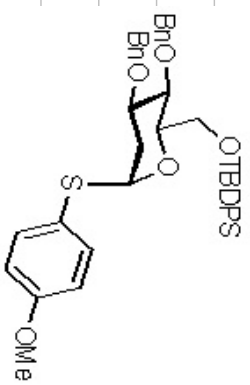

**47a**

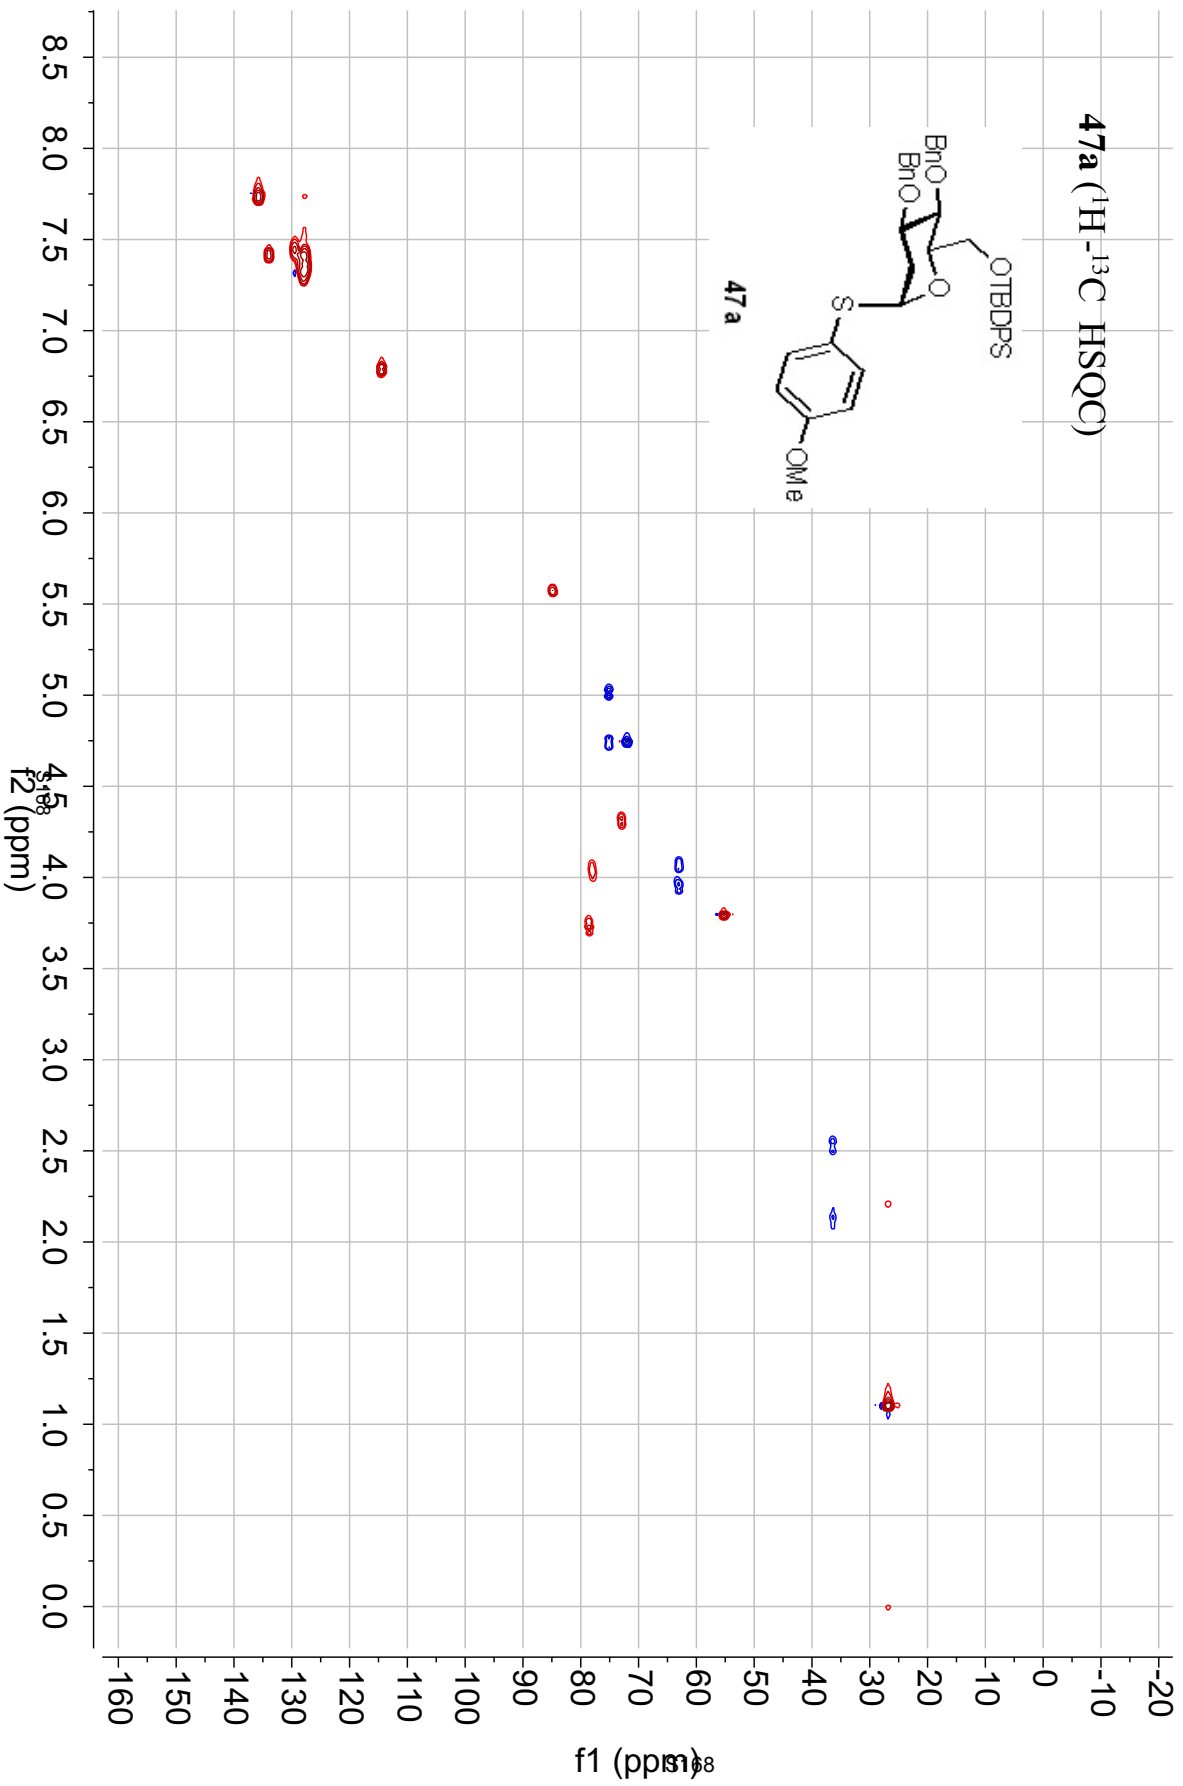



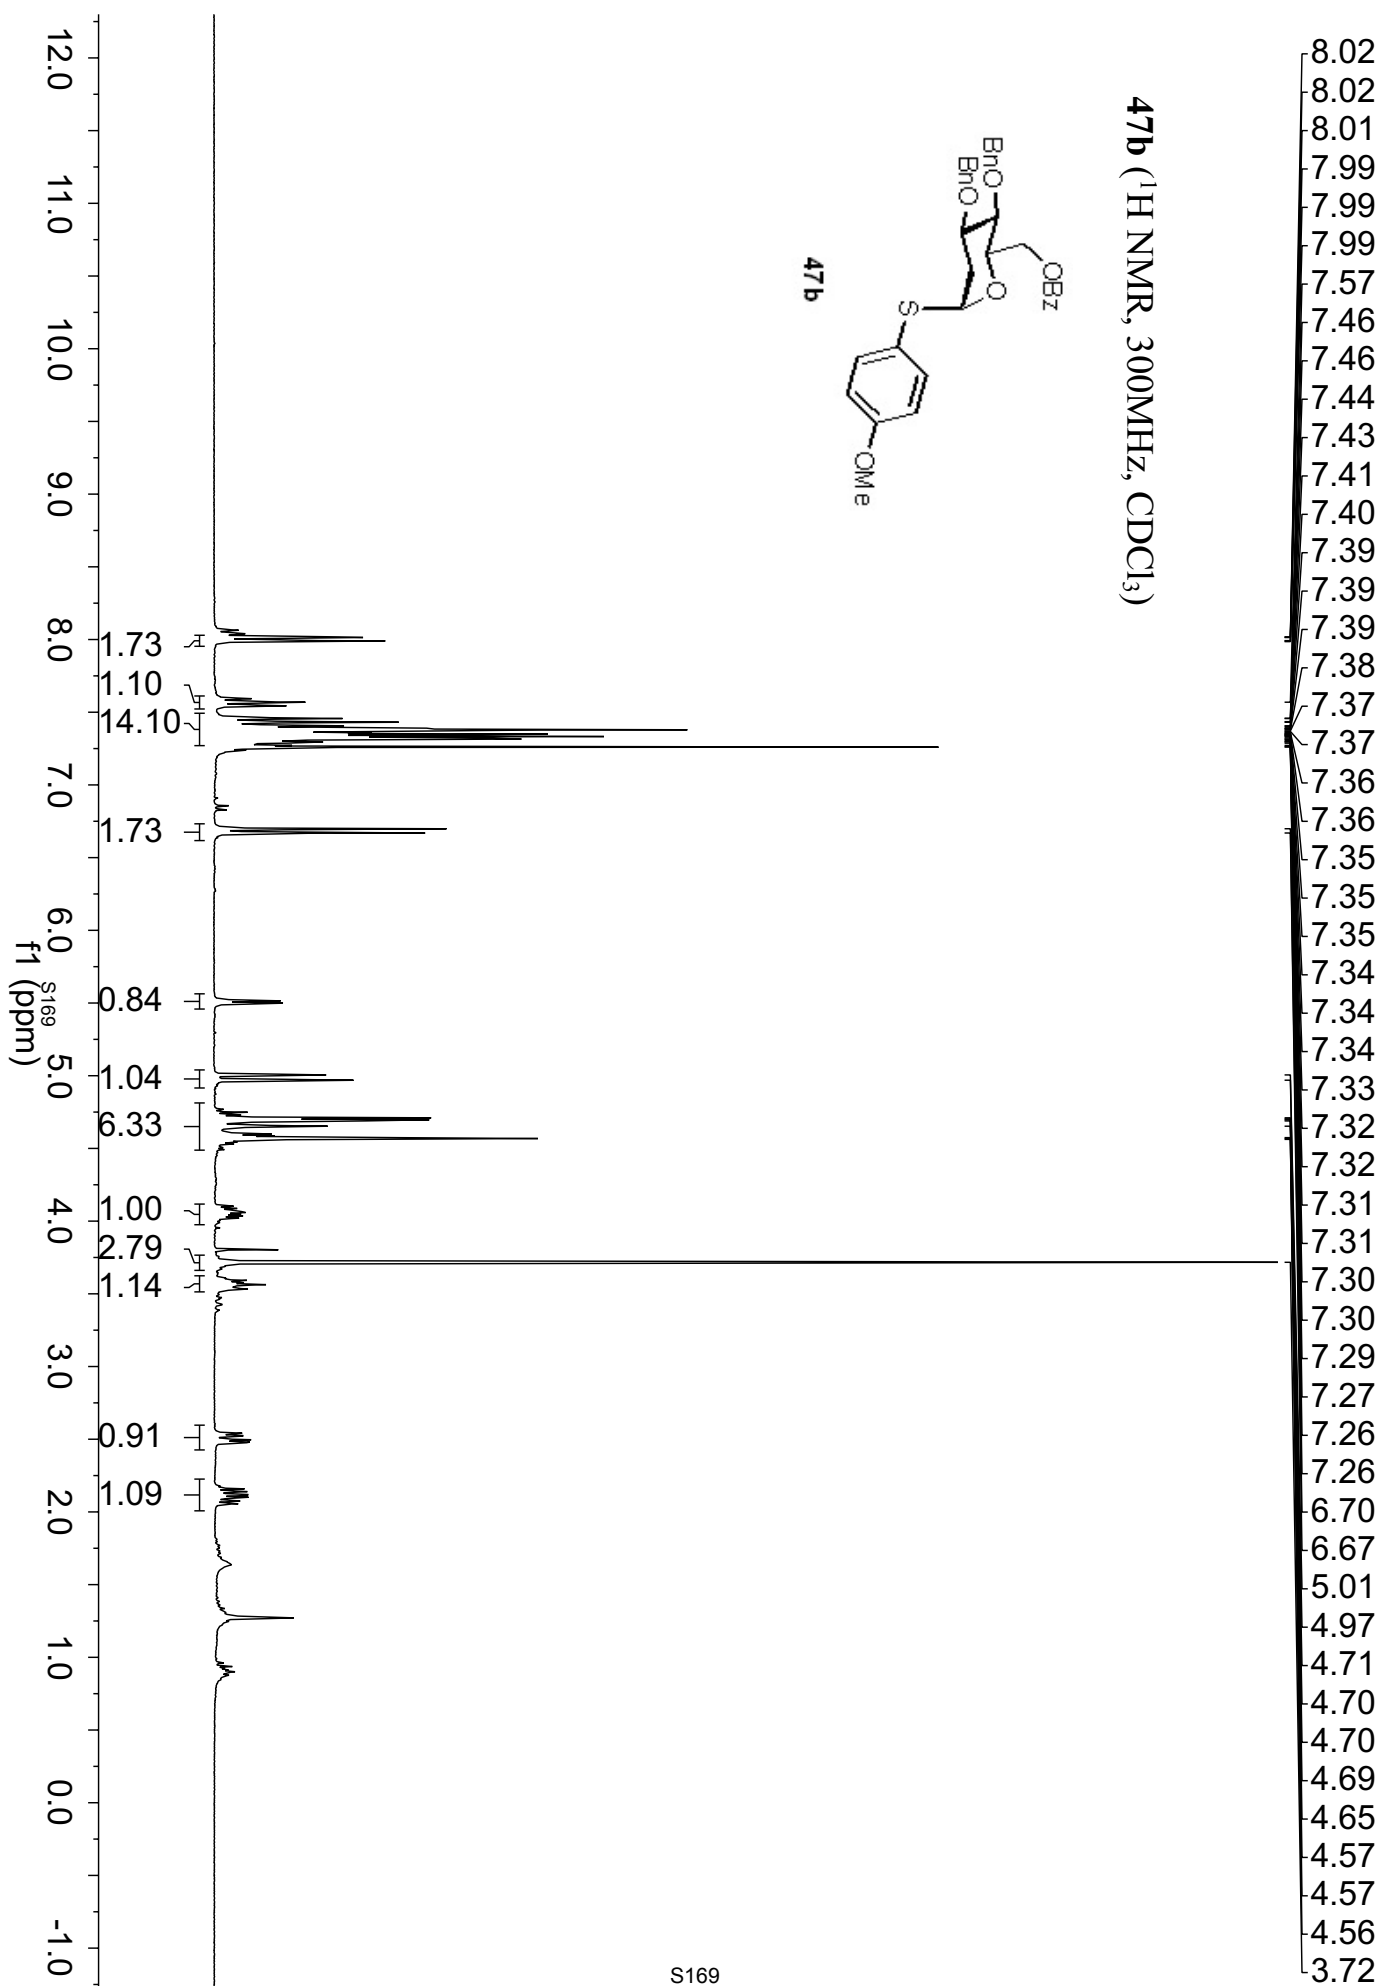

**47b** ( $^{13}\text{C}$  NMR, 75MHz,  $\text{CDCl}_3$ )

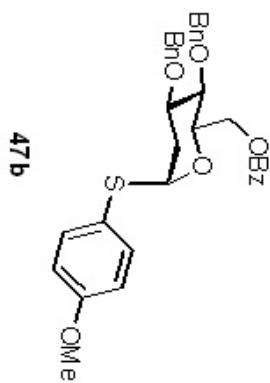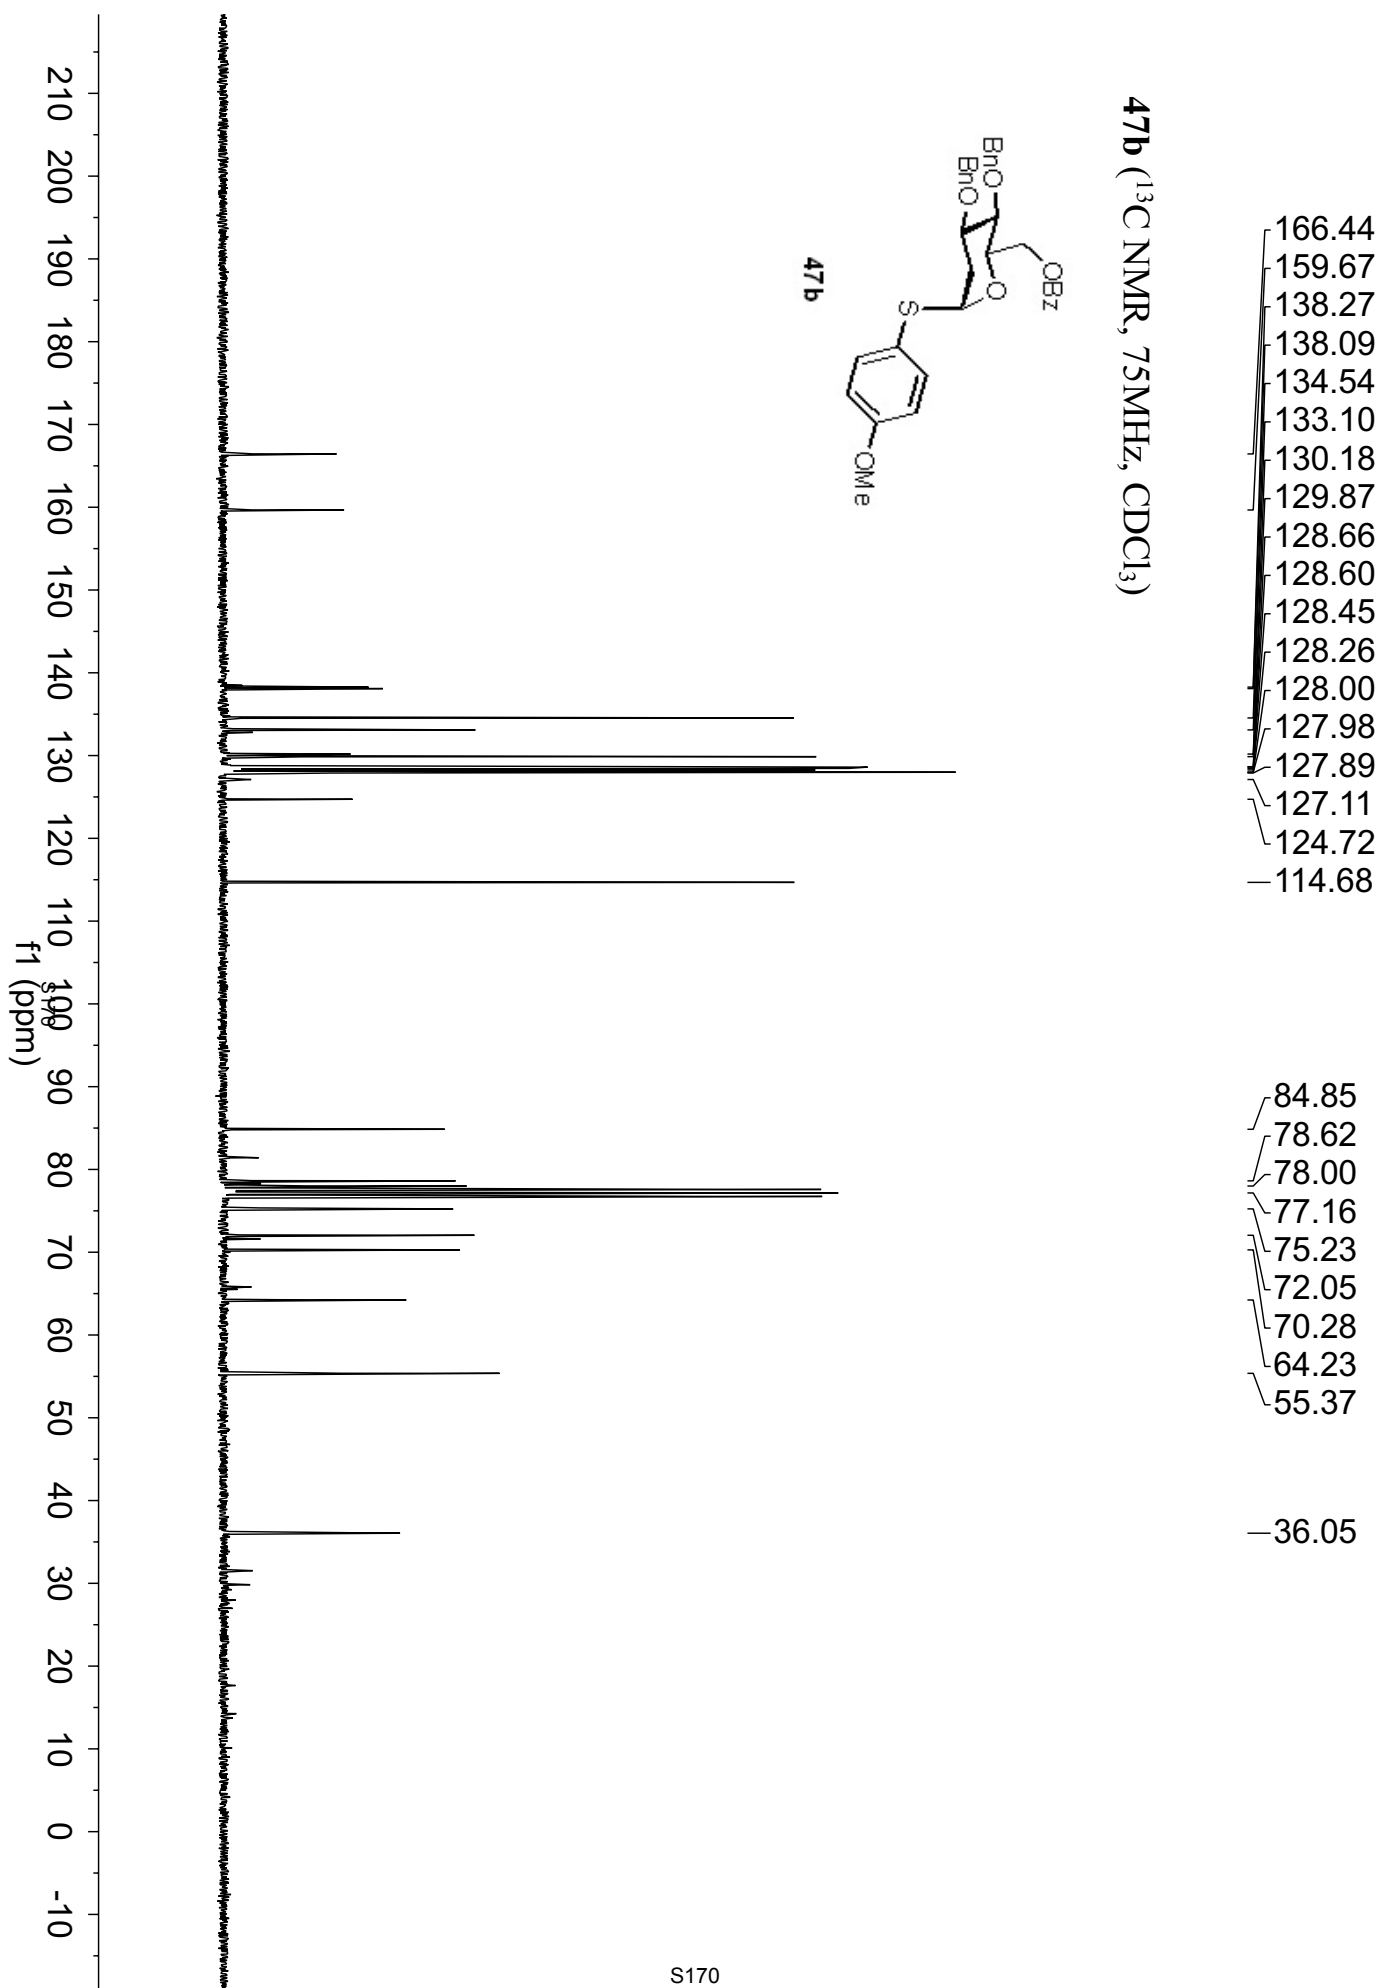

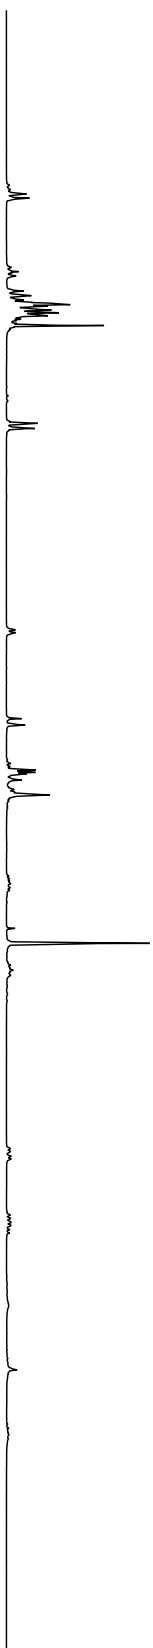

**47b** ( $^1\text{H}$ - $^{13}\text{C}$  Coupled HSQC)

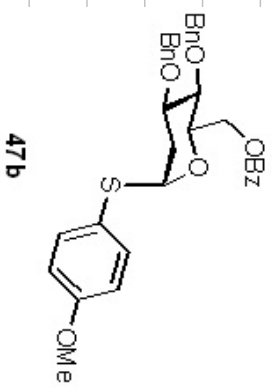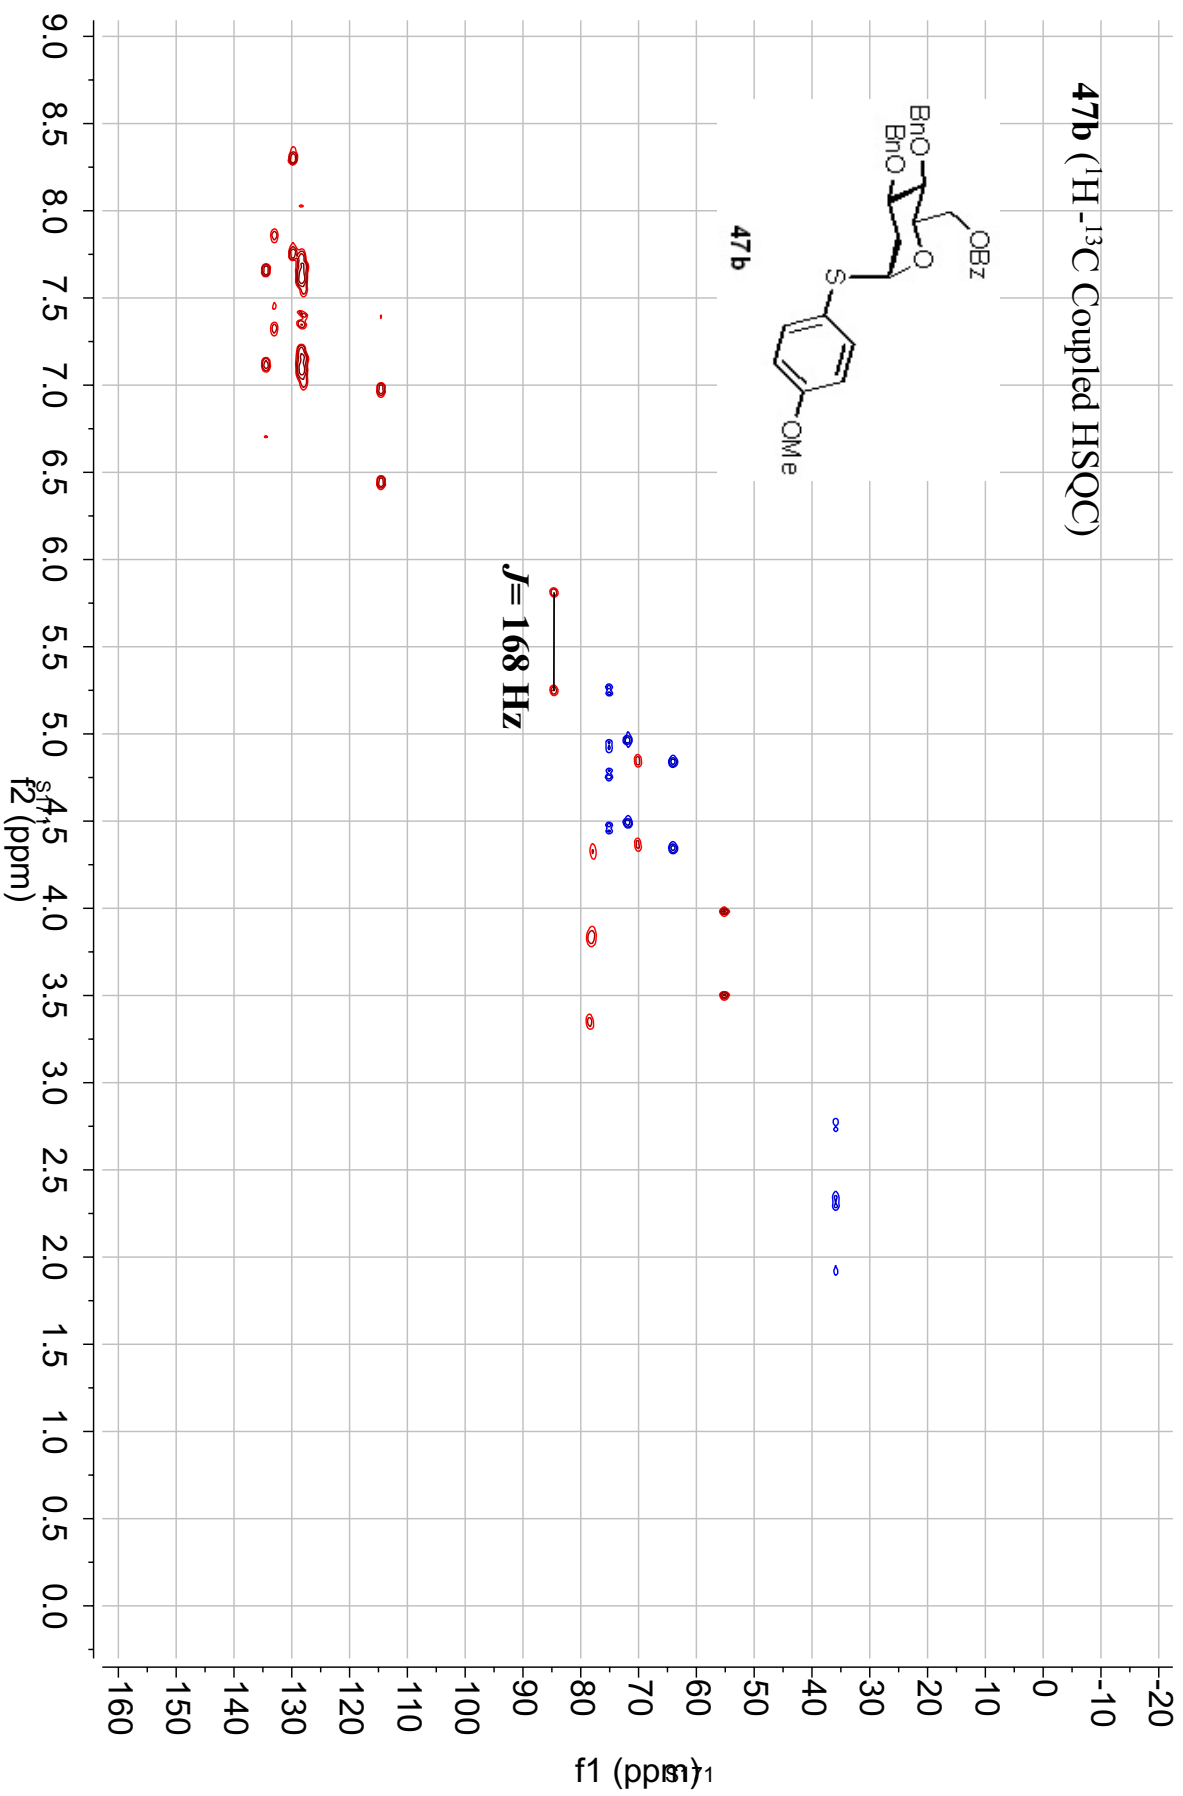



**47b** ( $^1\text{H}$ - $^{13}\text{C}$  HSQC)

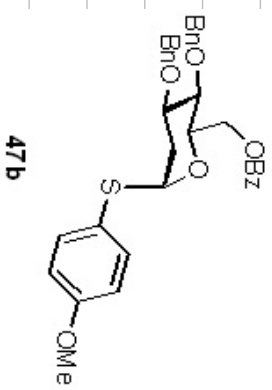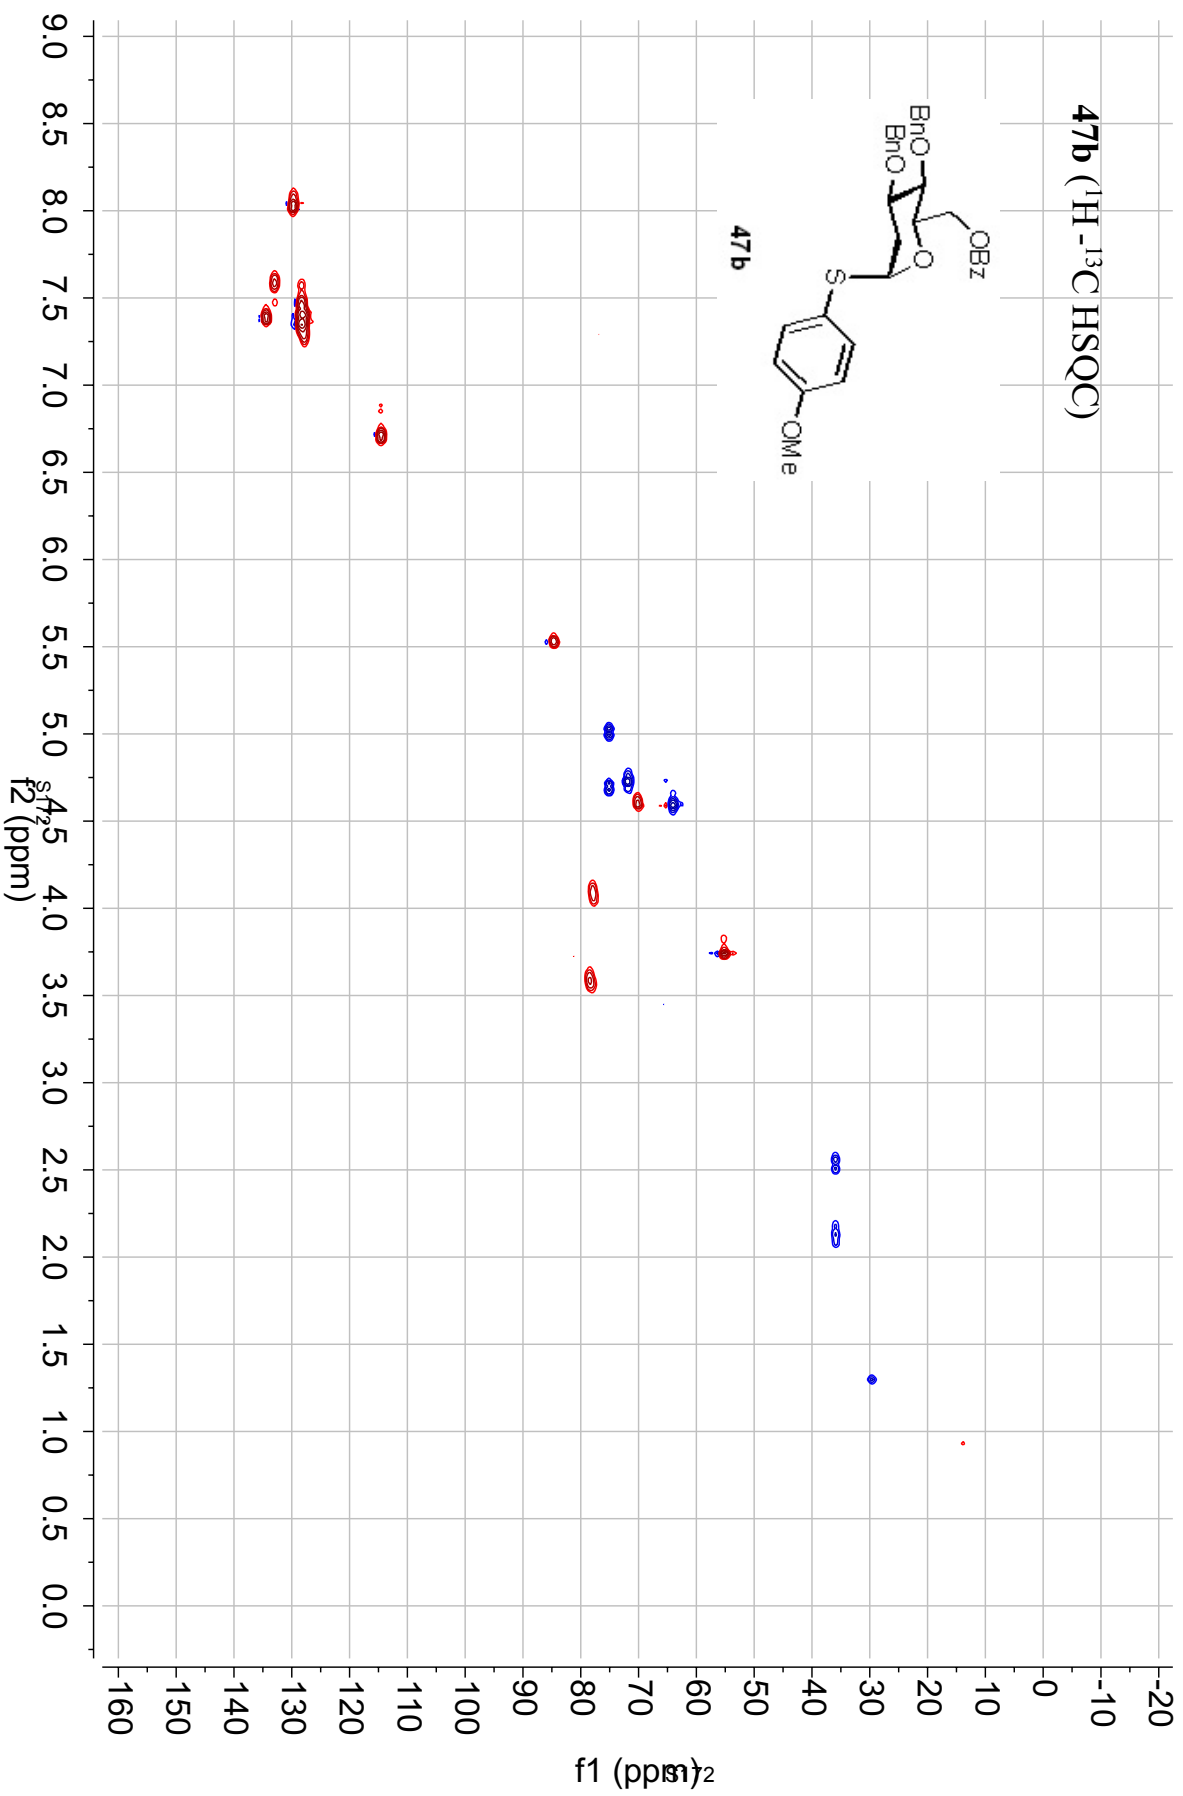

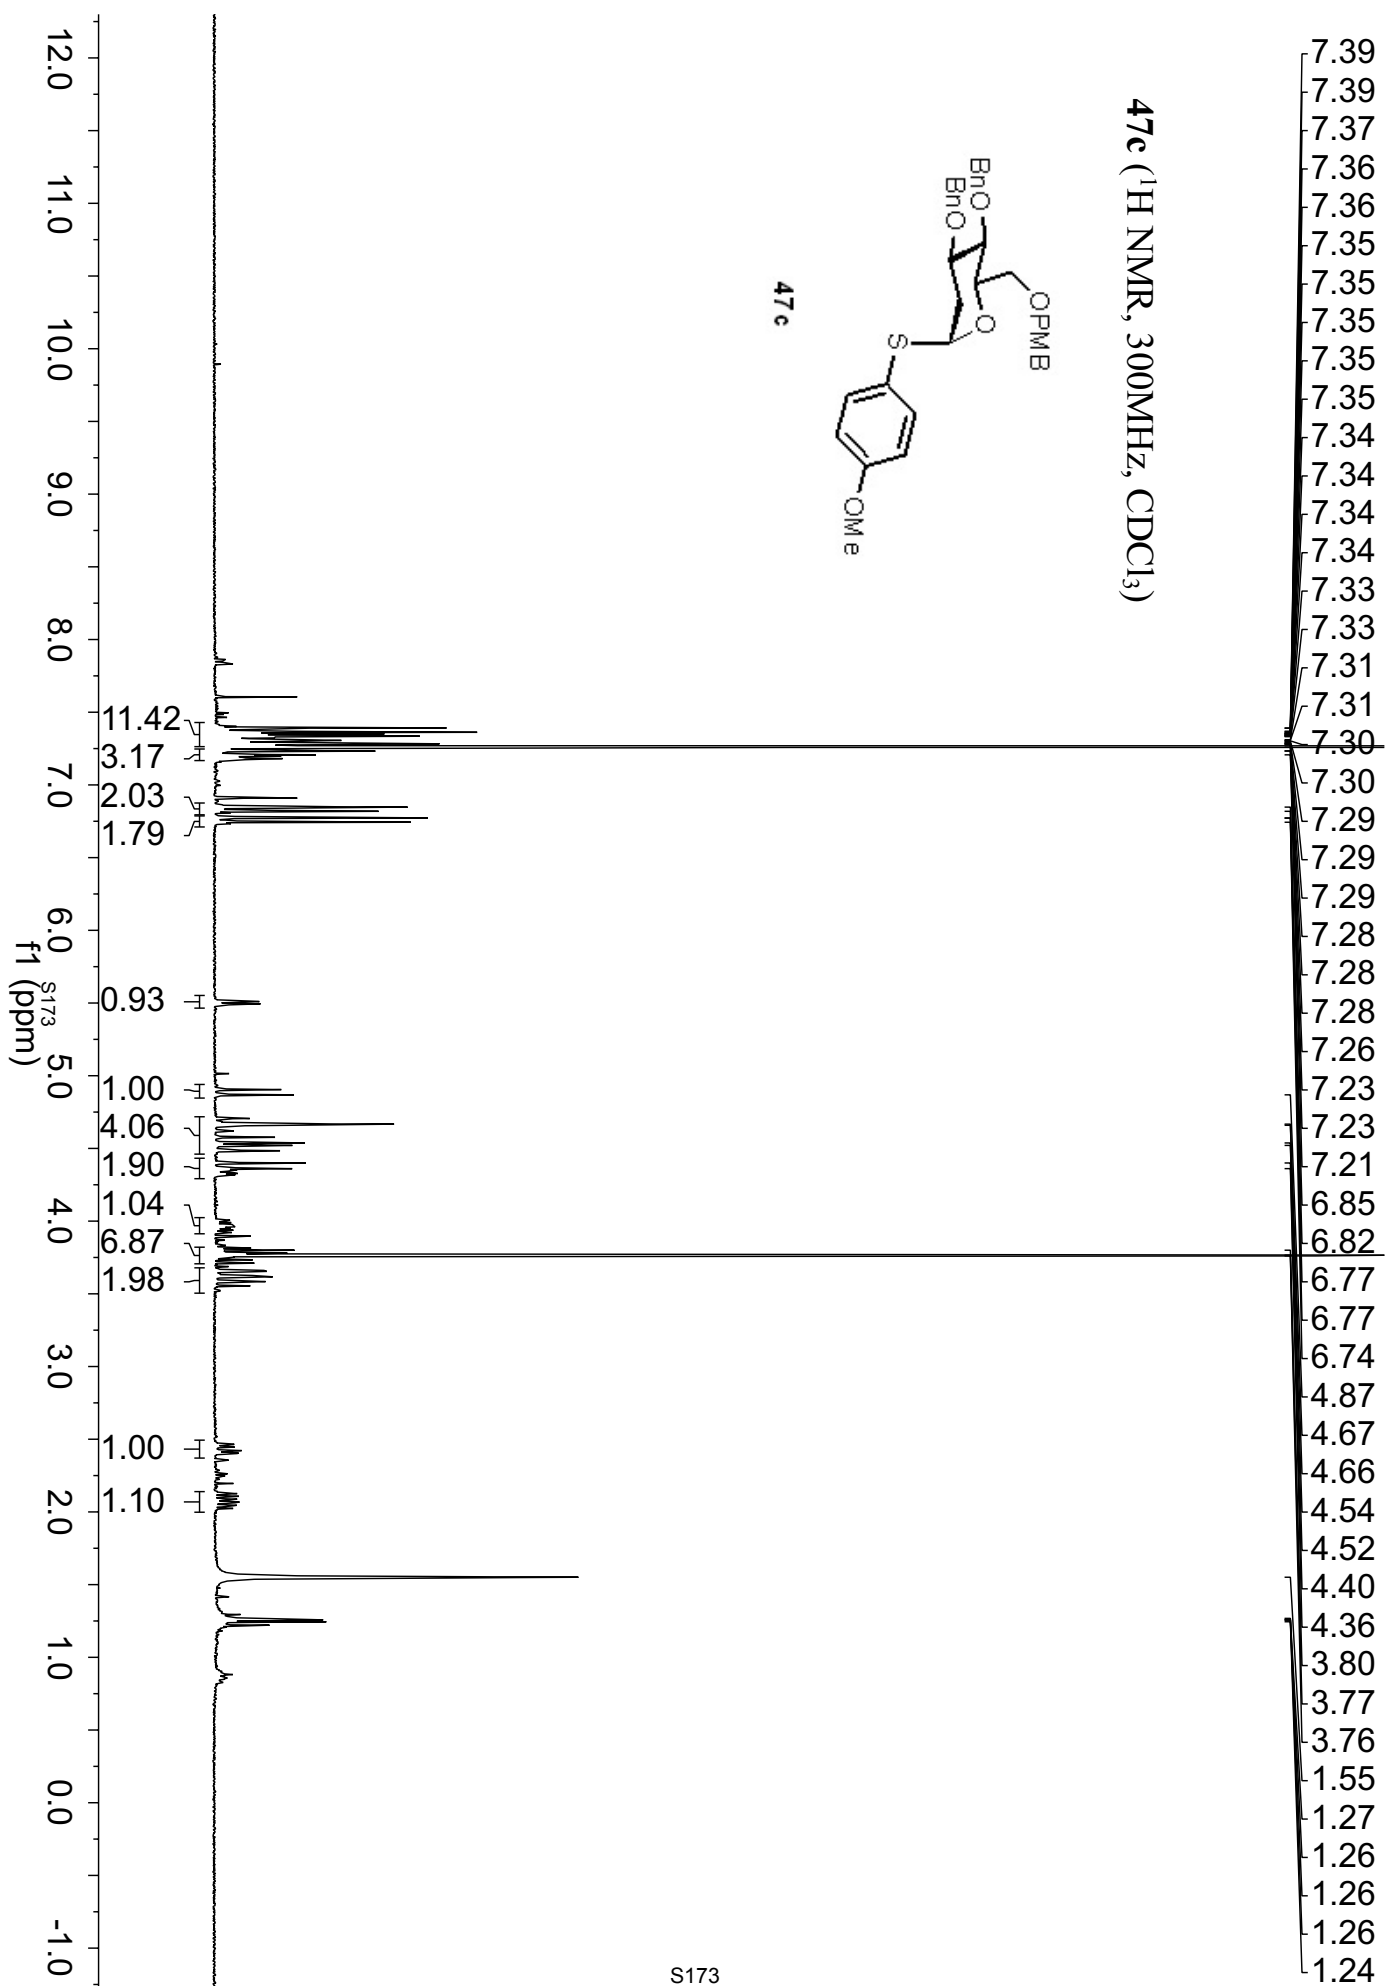

47c (<sup>13</sup>C NMR, 75MHz, CDCl<sub>3</sub>)

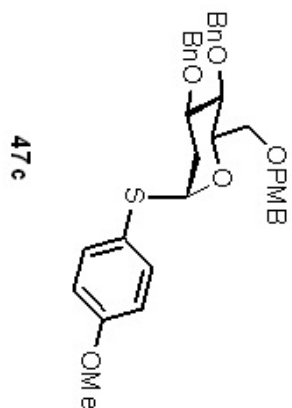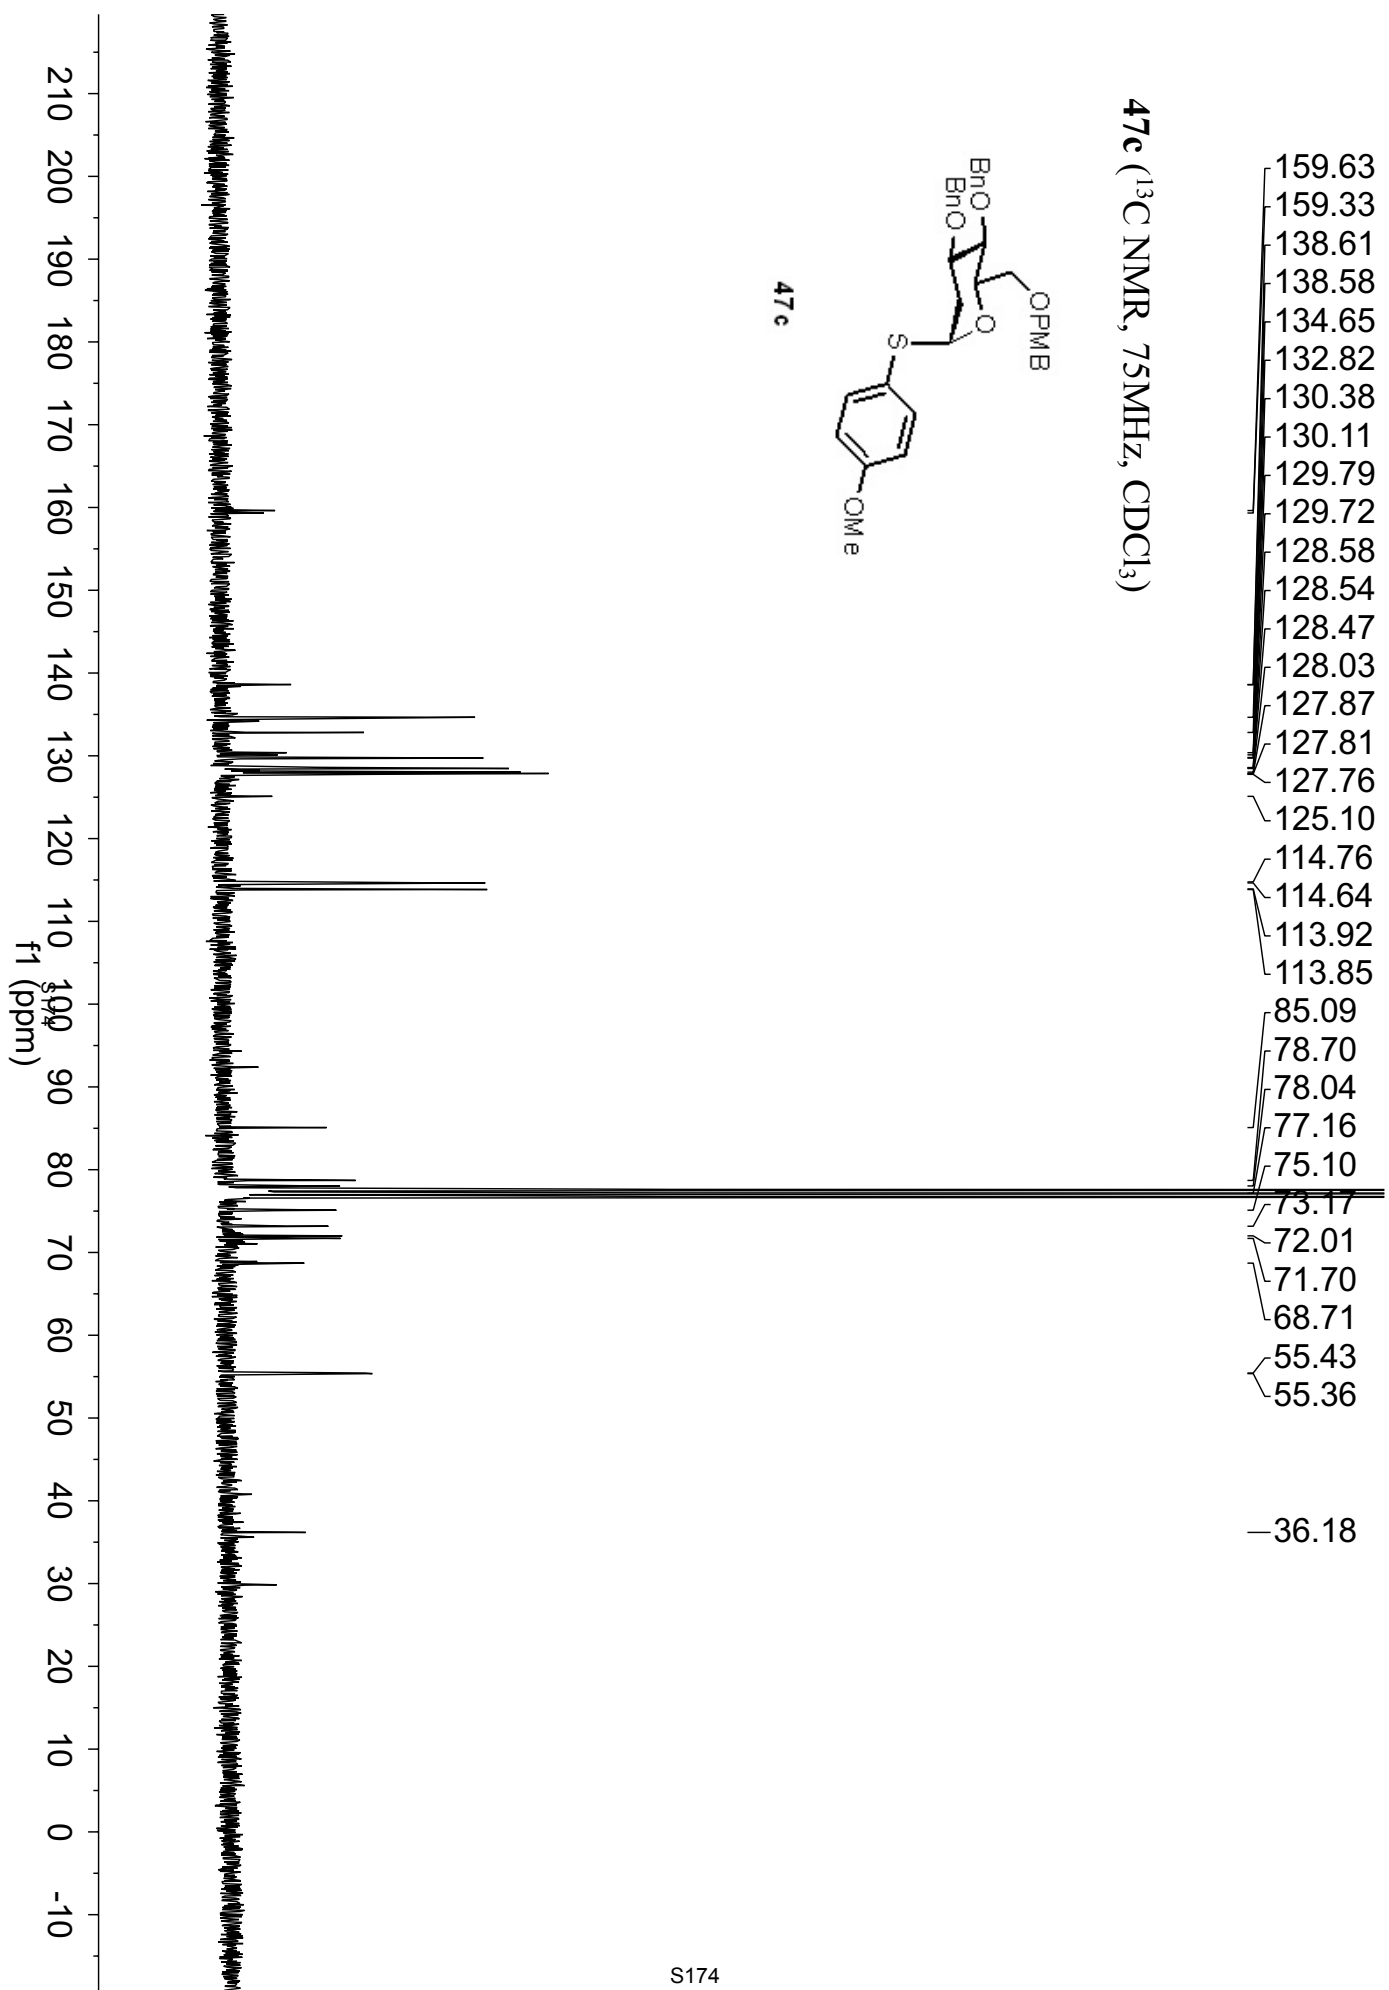

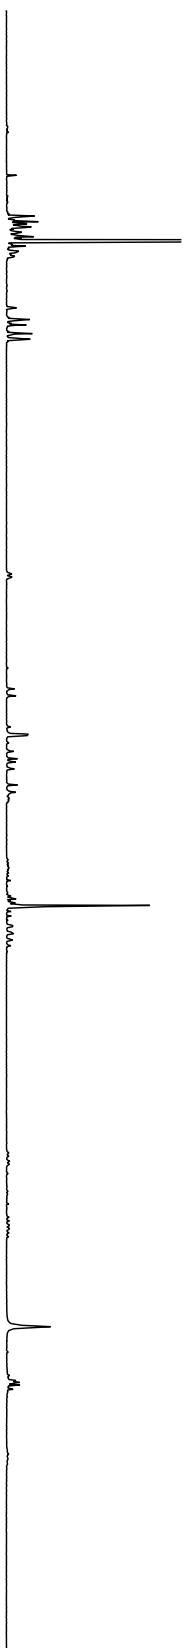

47c (<sup>1</sup>H-<sup>13</sup>C Coupled HSQC)

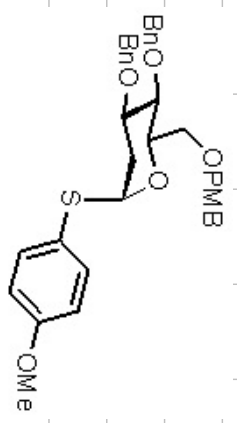

47c

$J = 169 \text{ Hz}$

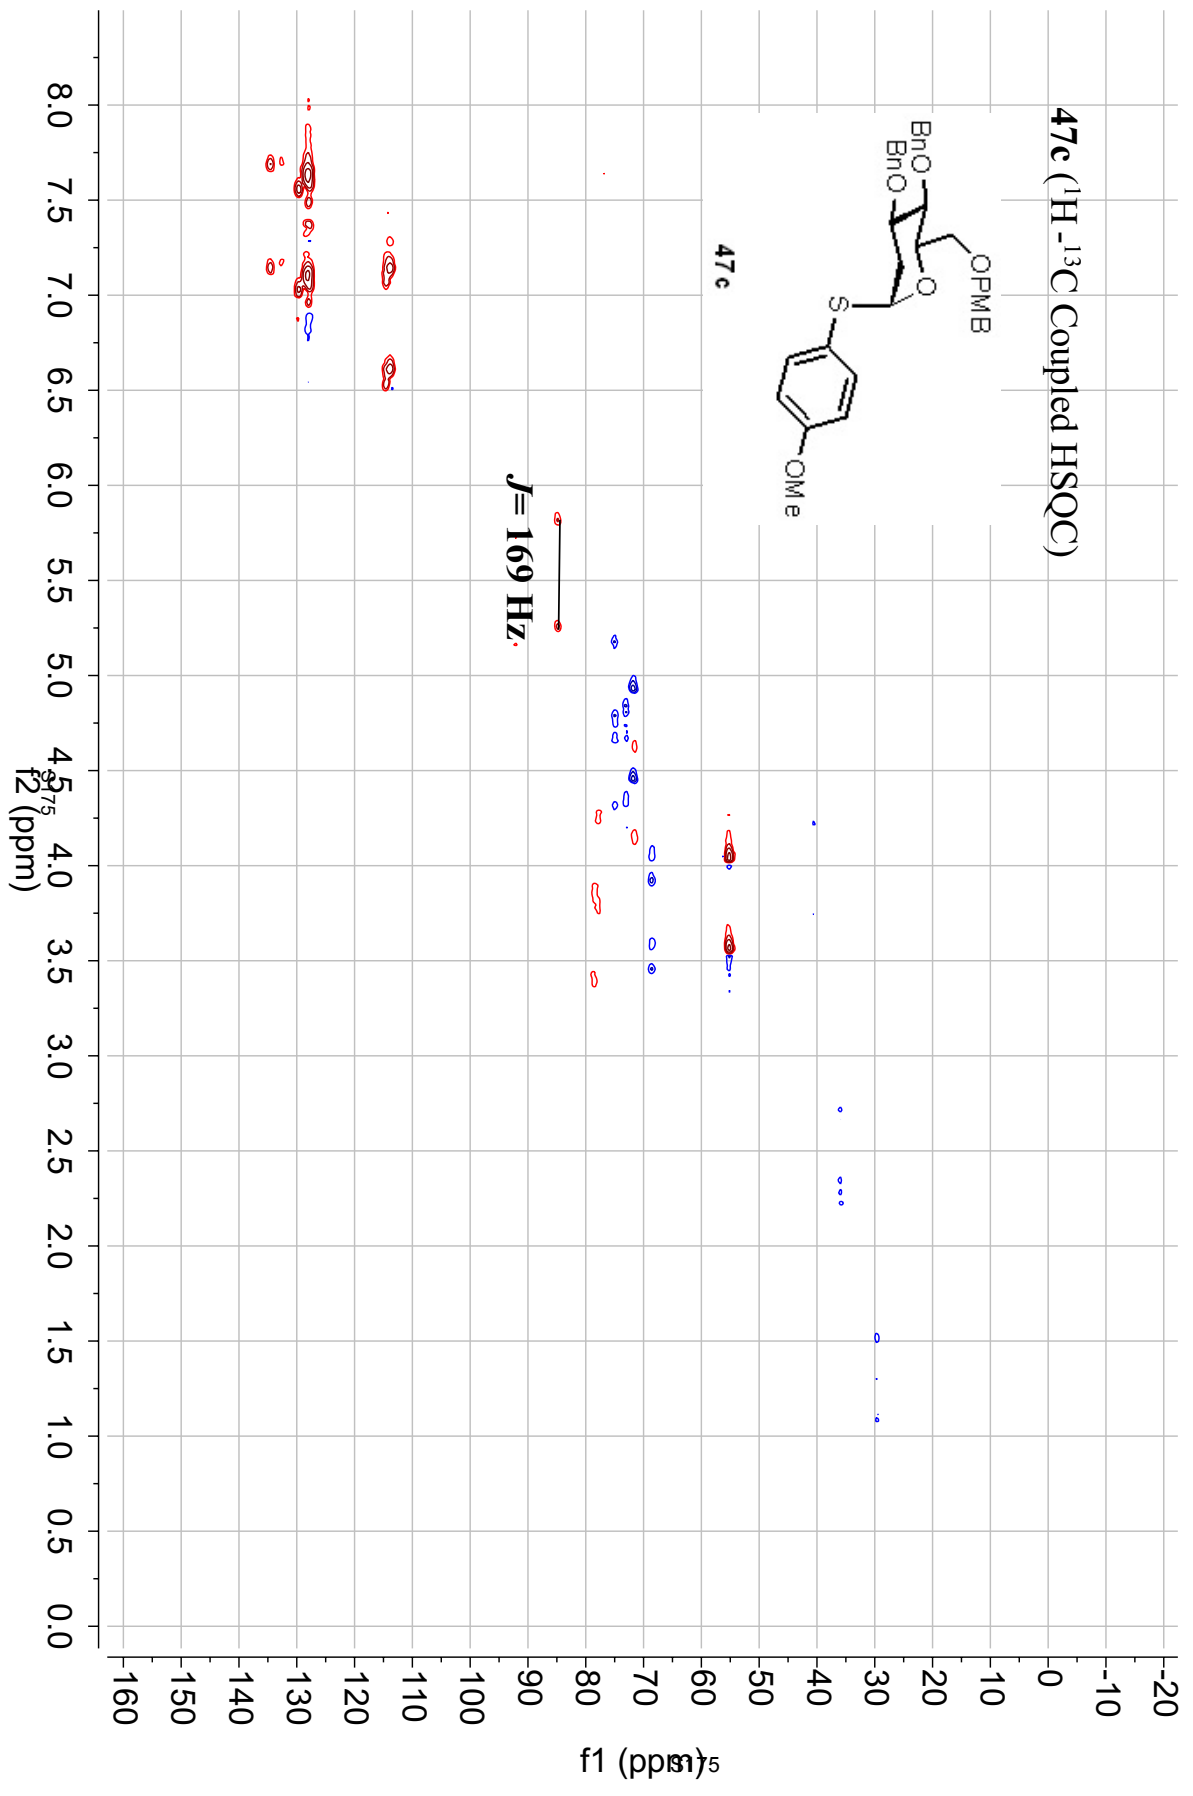



47c (1H-13C HSQC)

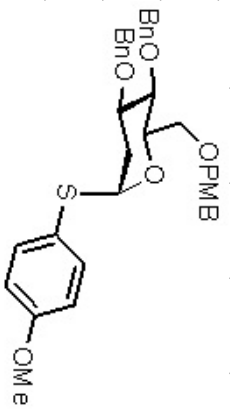

47c

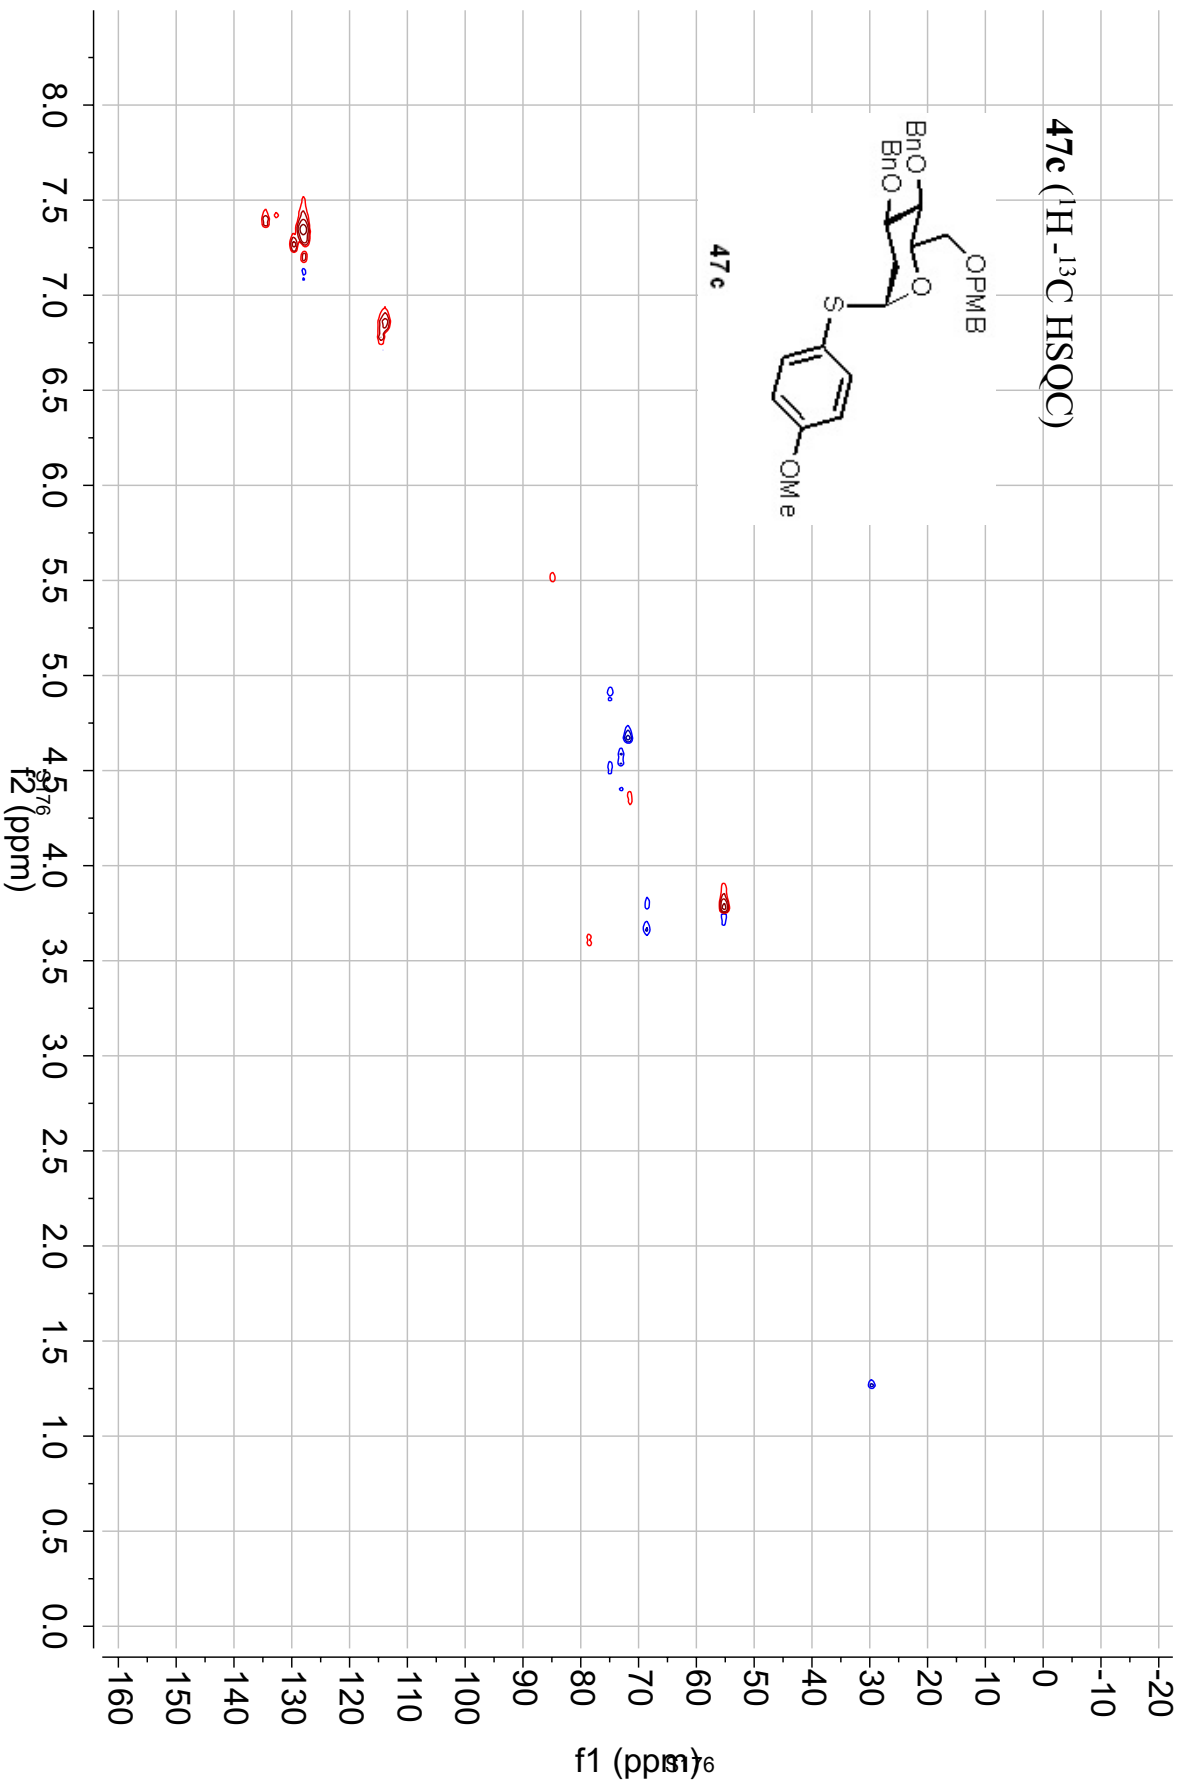





**47d** ( $^{13}\text{C}$  NMR, 75MHz,  $\text{CDCl}_3$ )

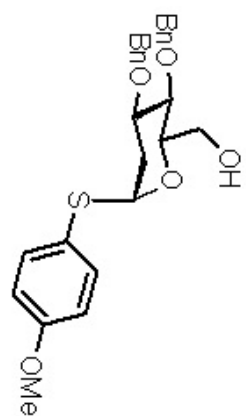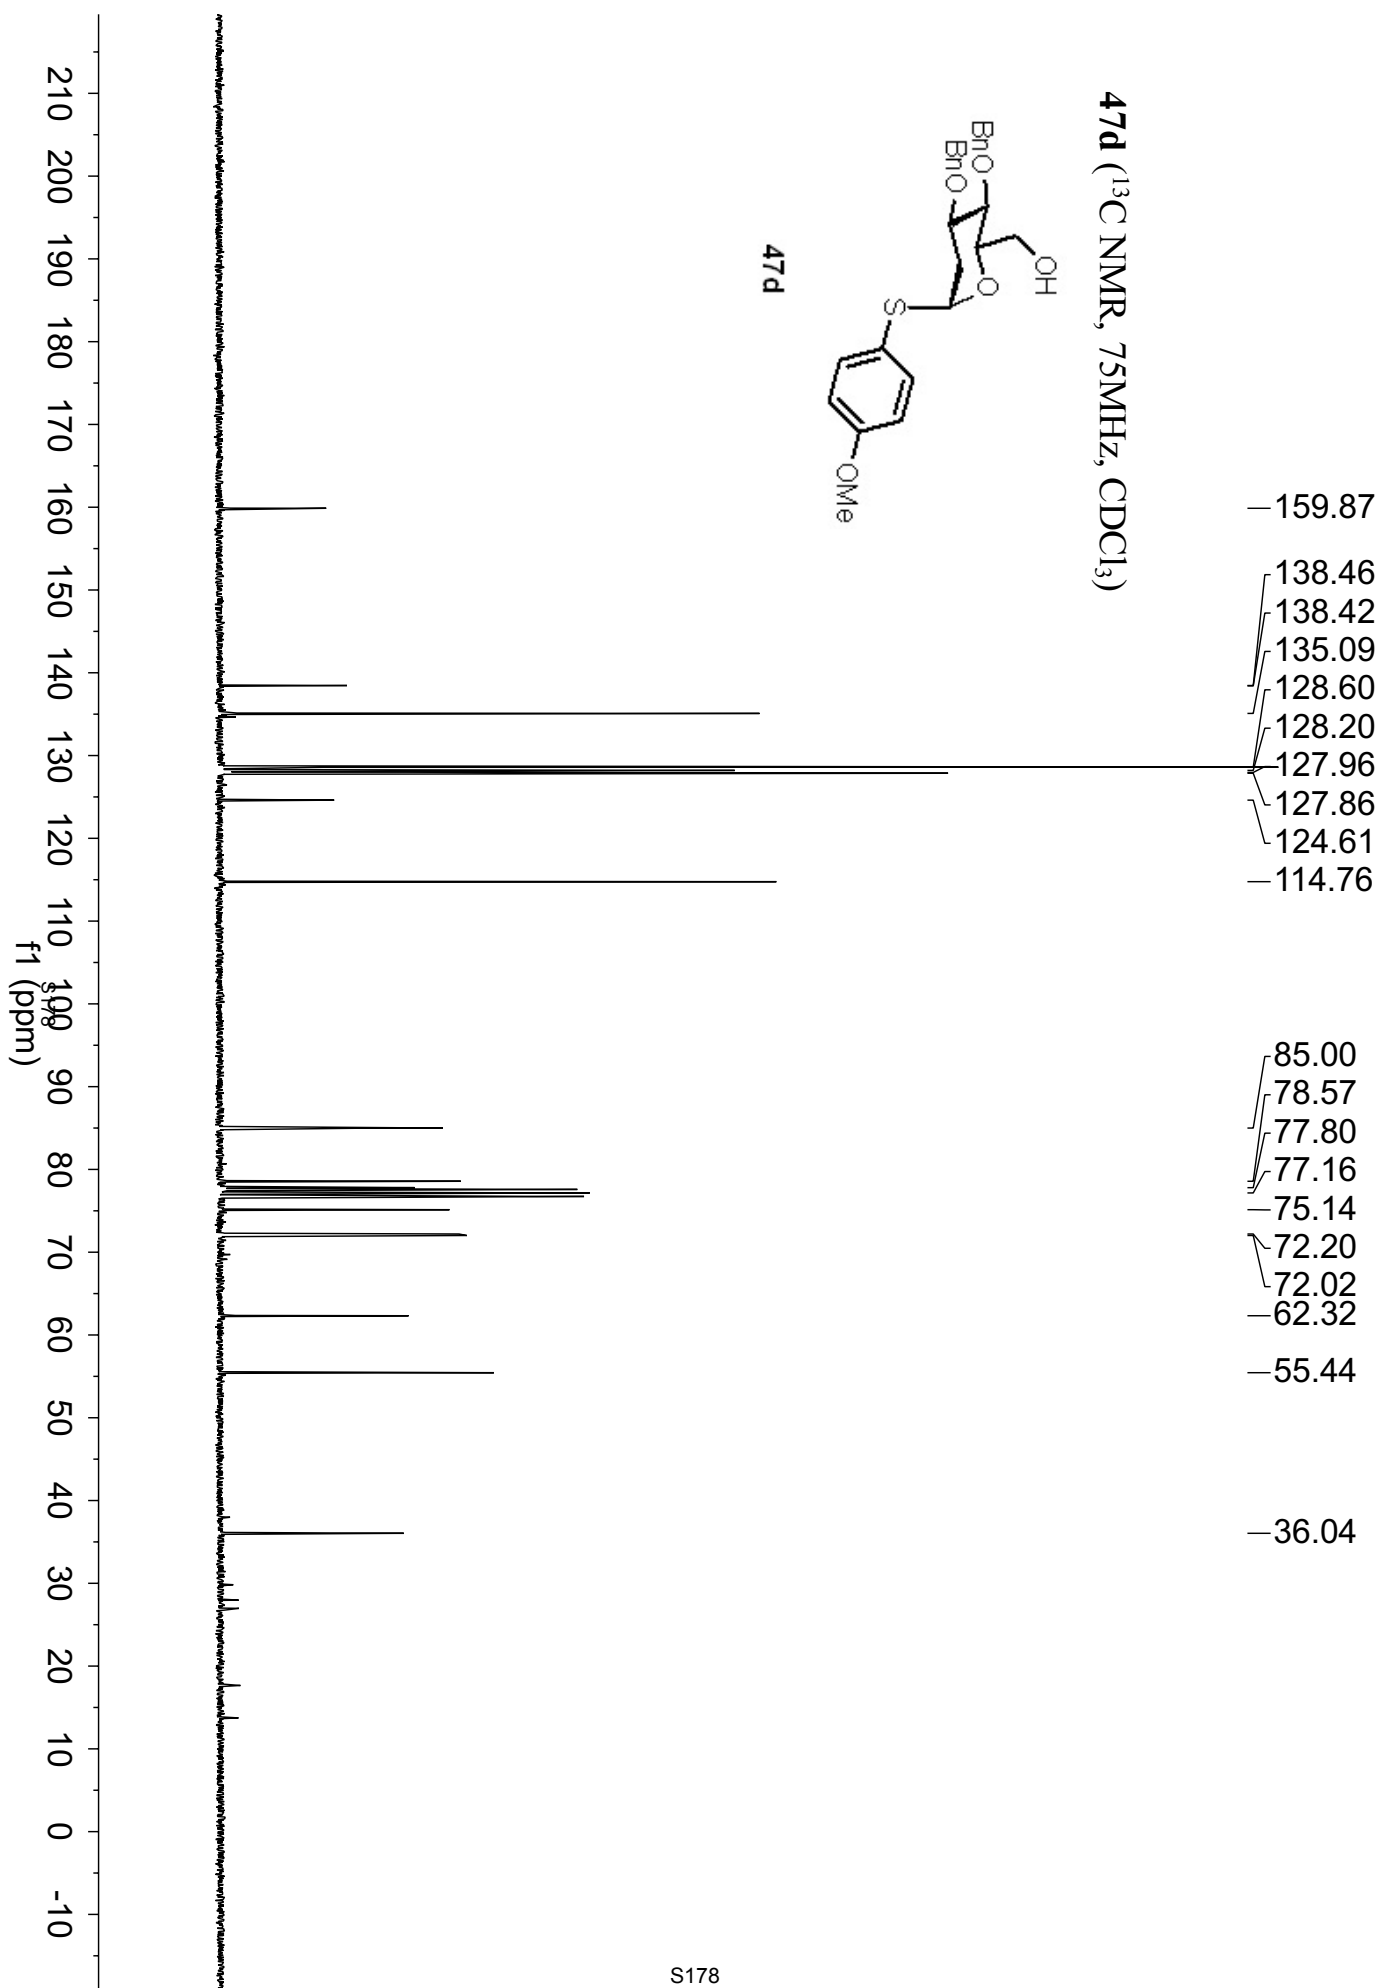

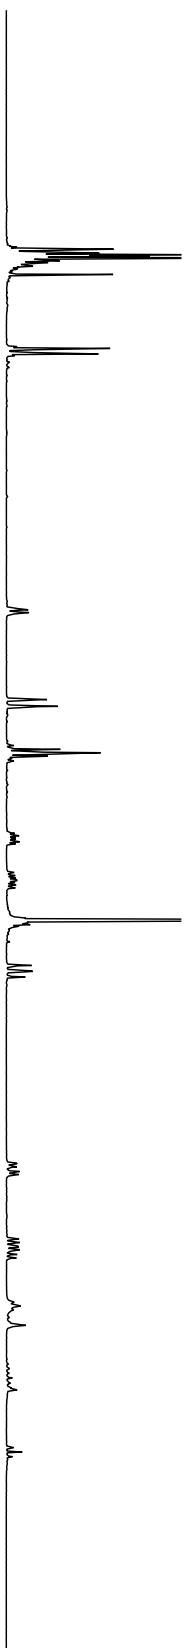

**47d** ( $^1\text{H}$ - $^{13}\text{C}$  Coupled HSQC)

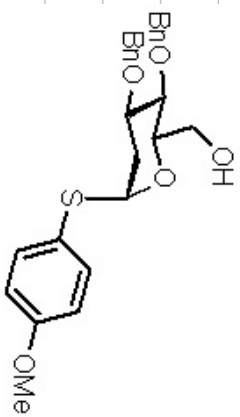

47d

$J = 168 \text{ Hz}$

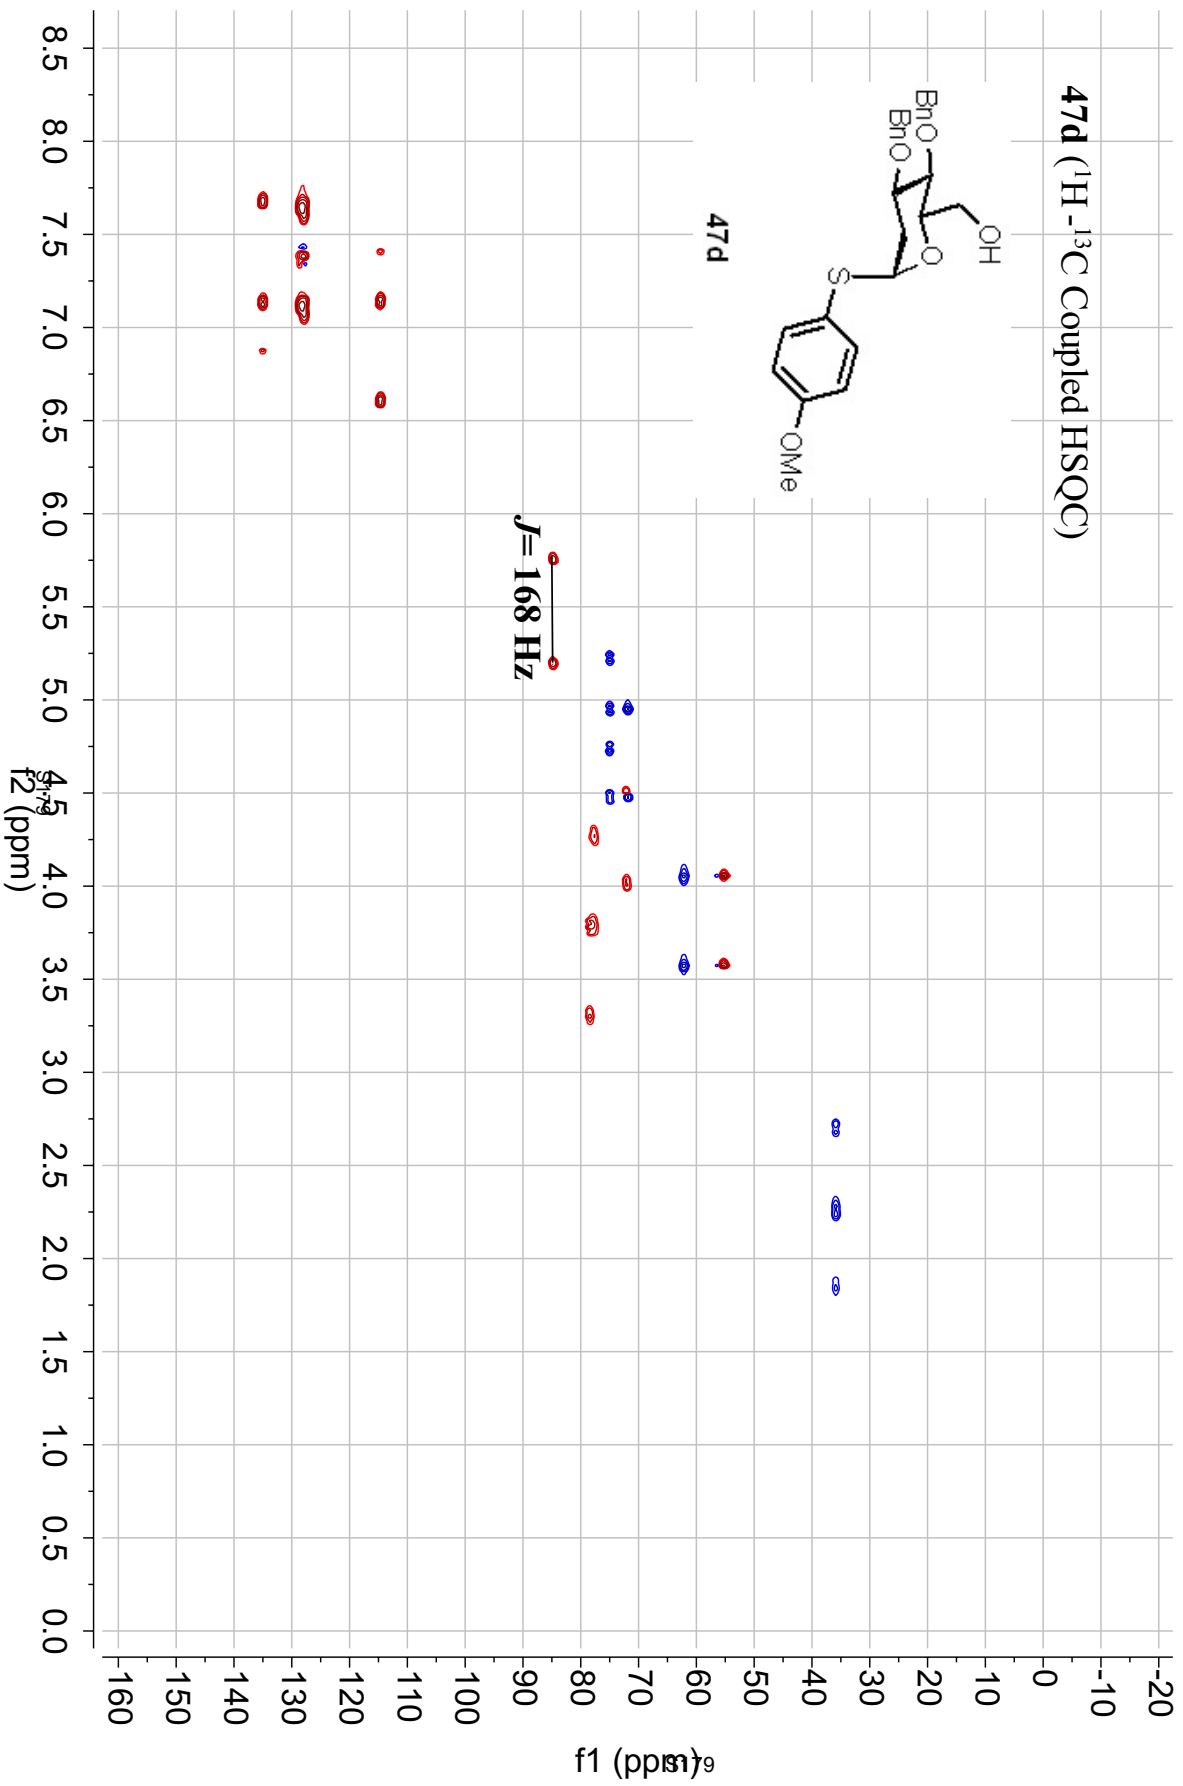

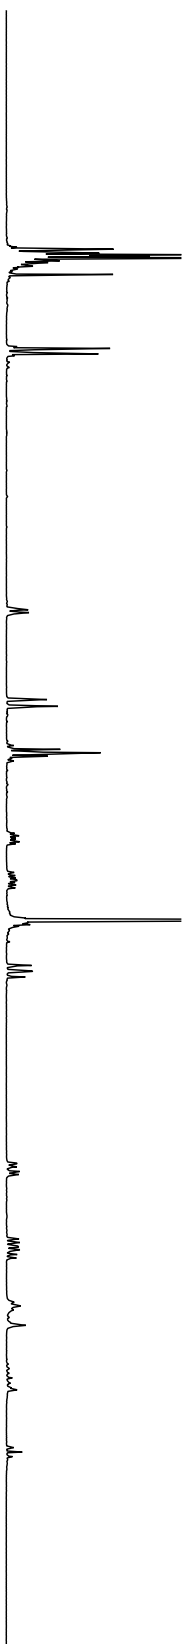

**47d** ( $^1\text{H}$ - $^{13}\text{C}$  HSQC)

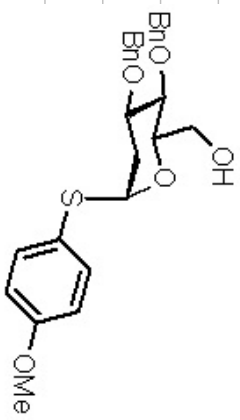

**47d**

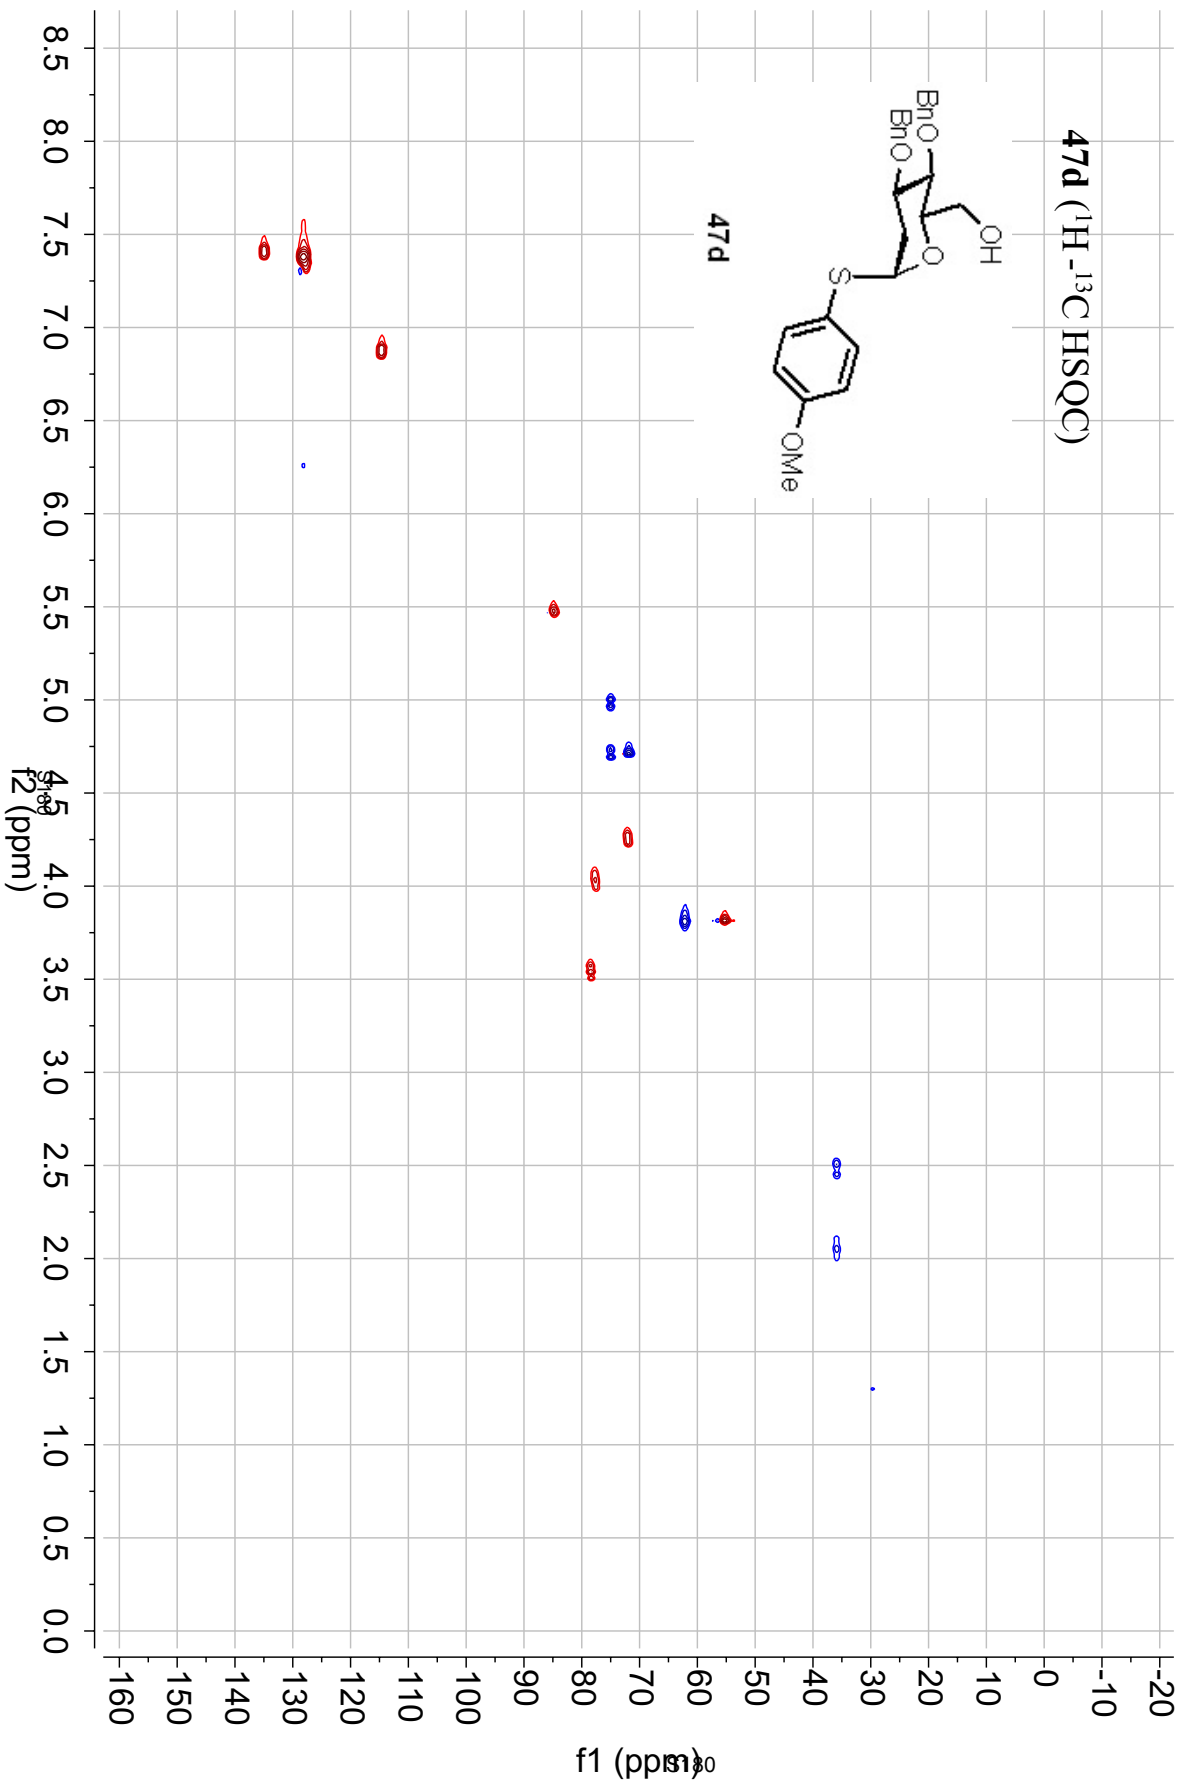

47e (<sup>1</sup>H NMR, 300MHz, CD<sub>3</sub>OD)

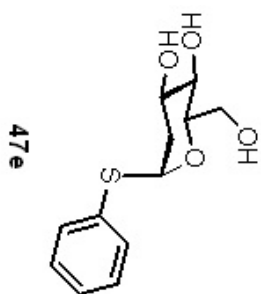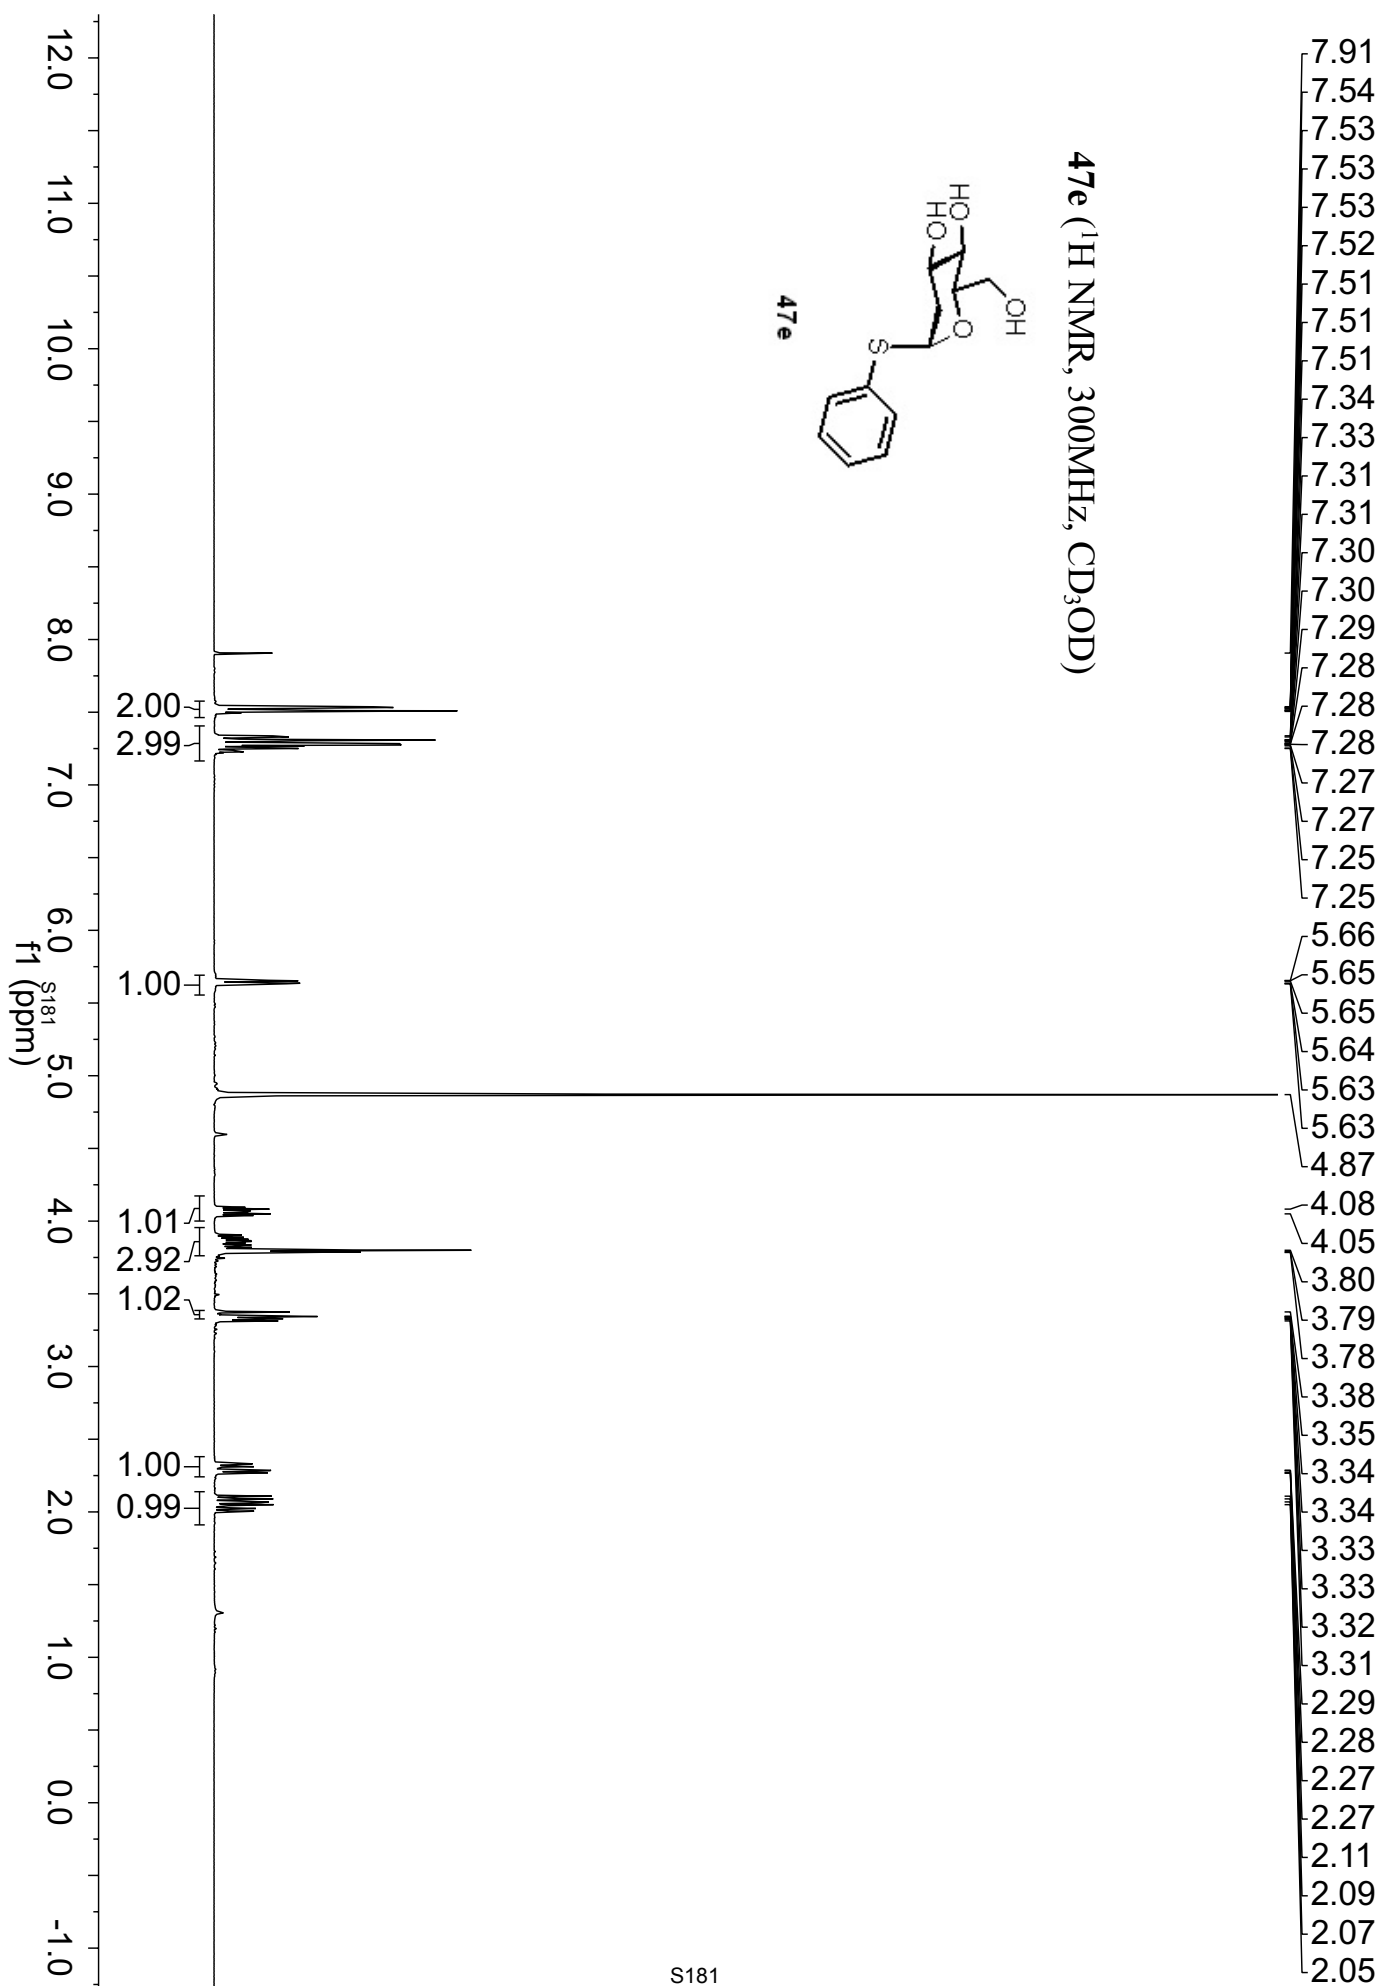

**47e** ( $^{13}\text{C}$  NMR, 75MHz,  $\text{CD}_3\text{OD}$ )

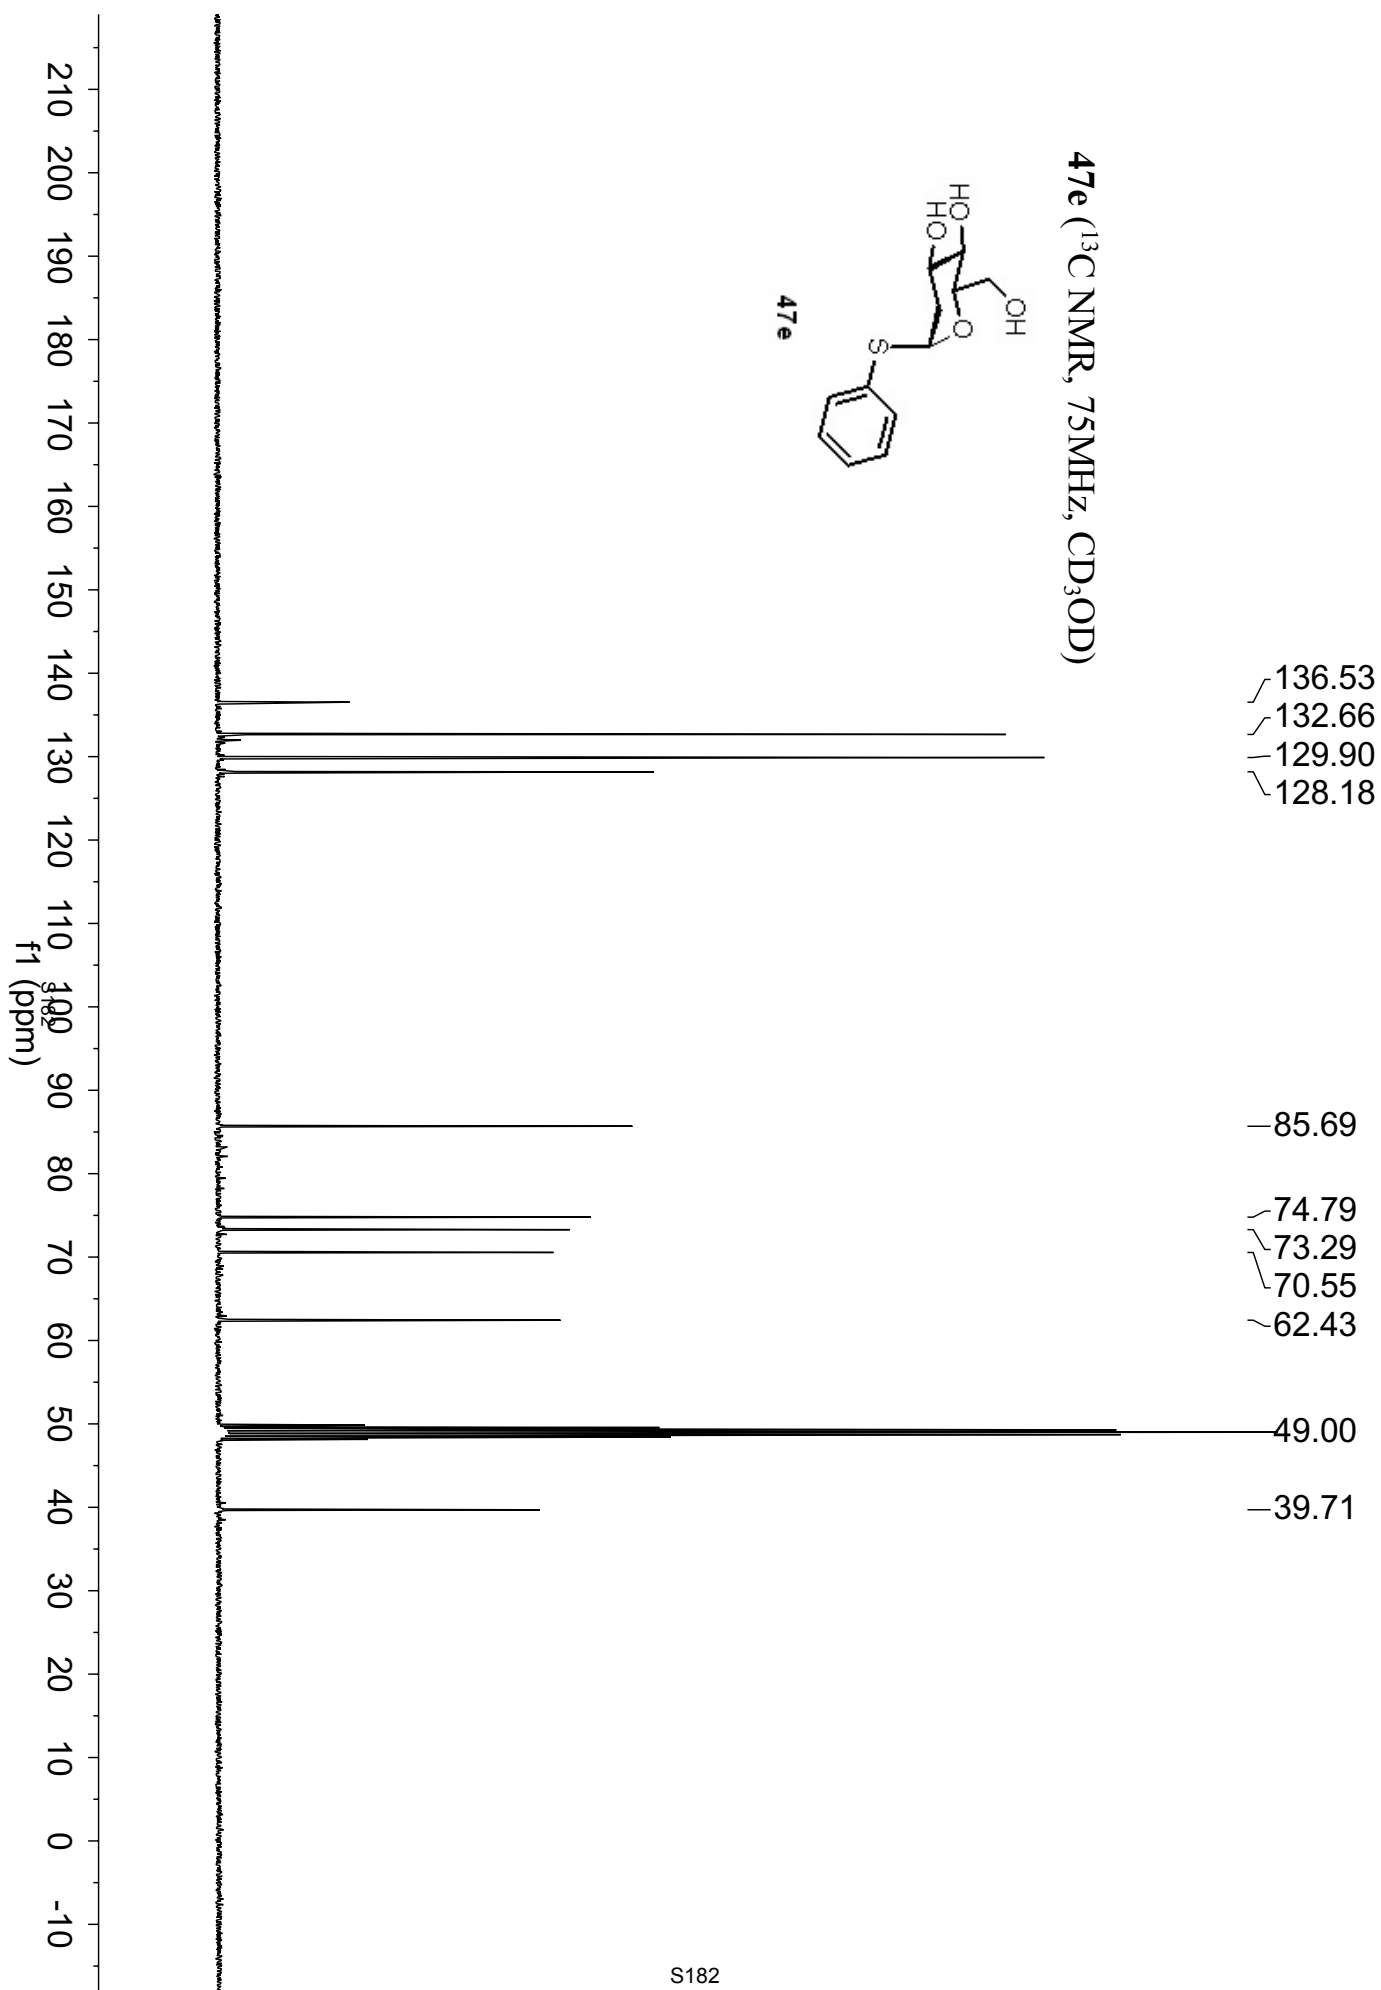

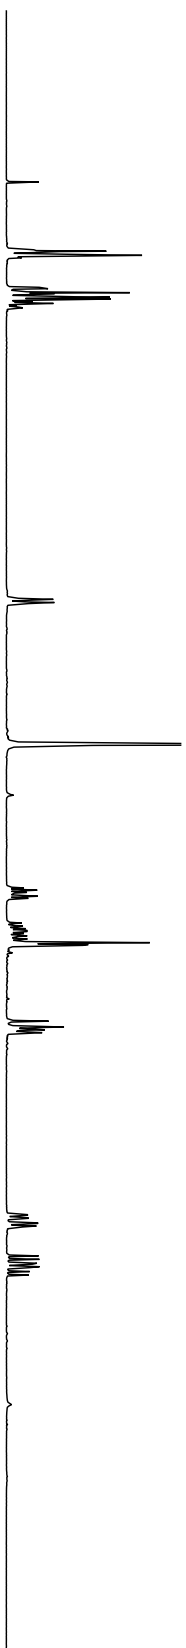

47e (<sup>1</sup>H-<sup>13</sup>C Coupled HSQC)

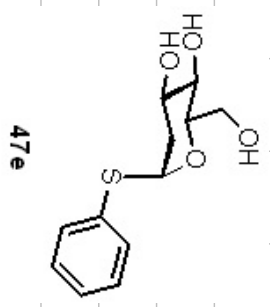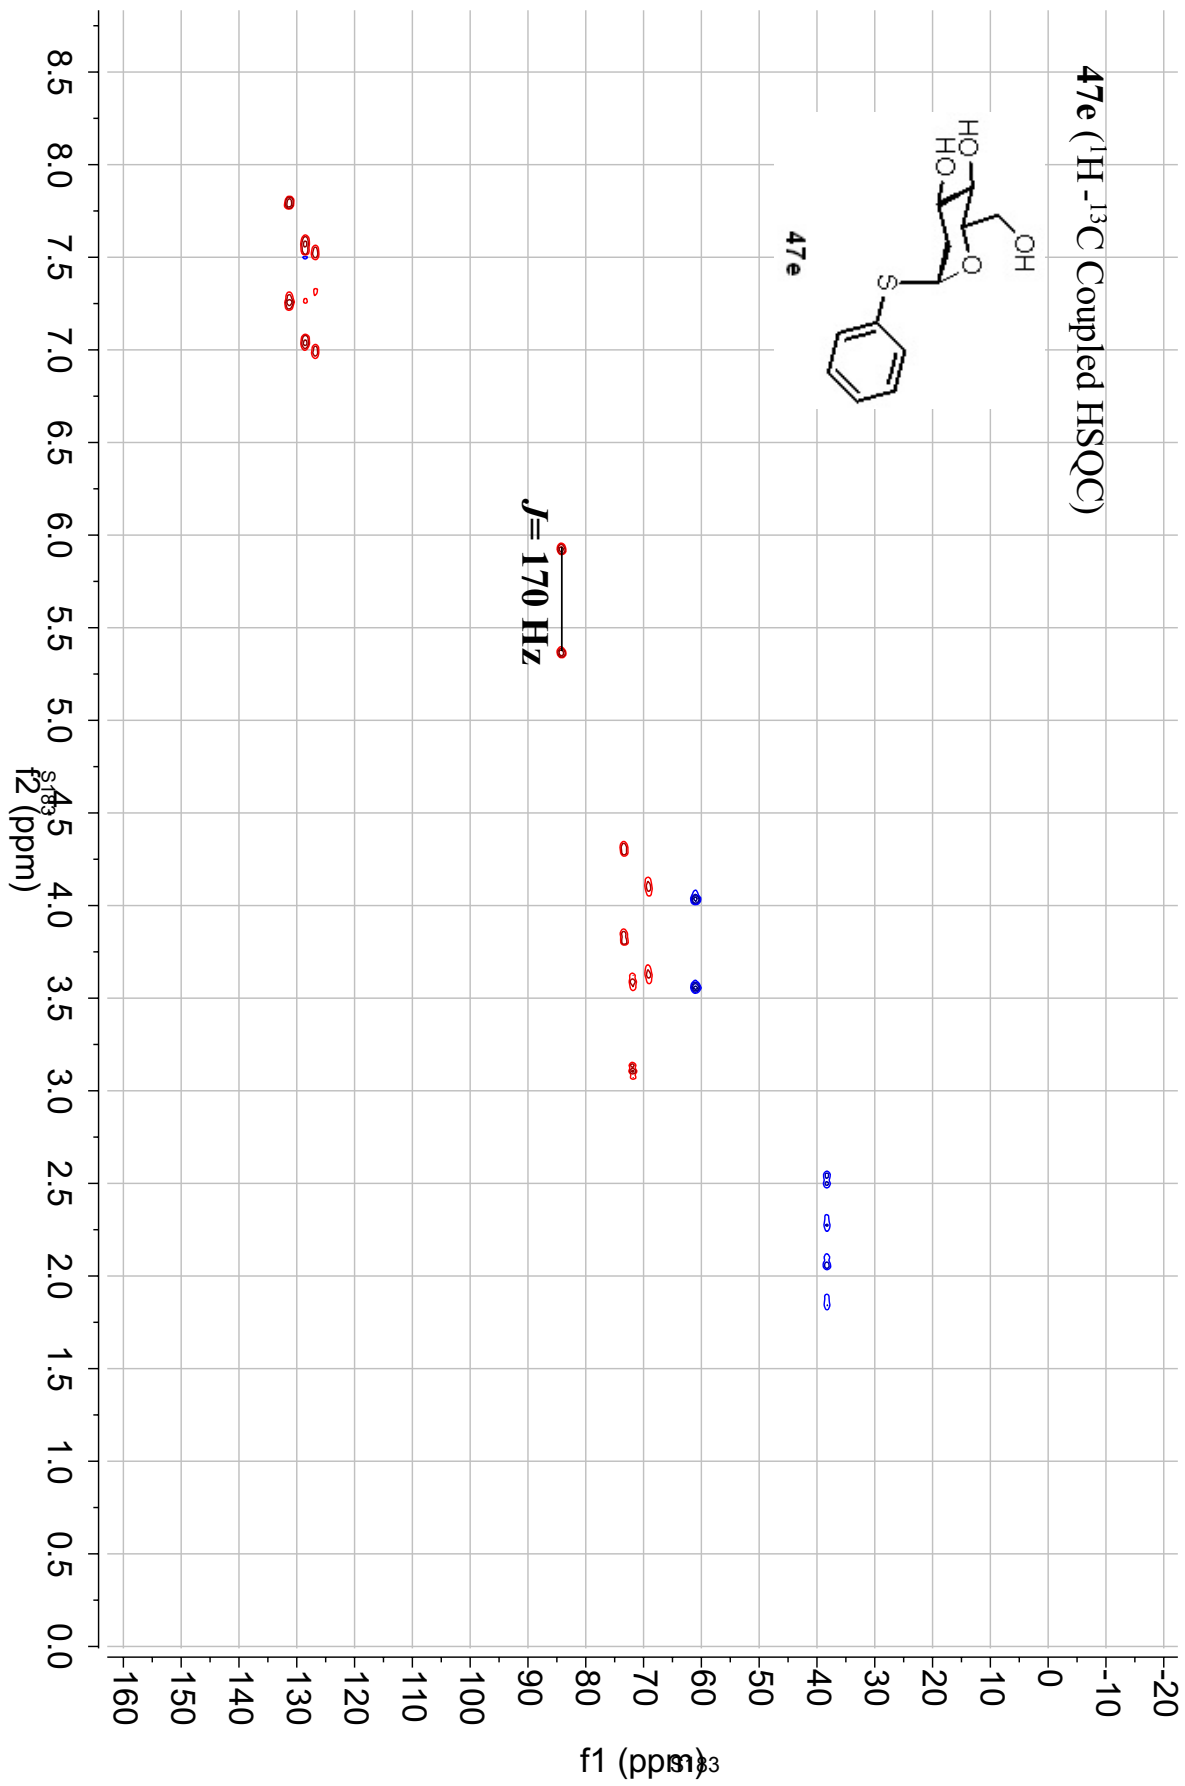



**47e** ( $^1\text{H}$ - $^{13}\text{C}$  HSQC)

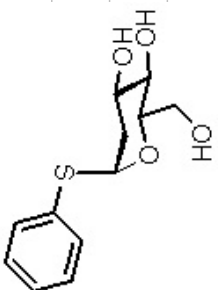

47e

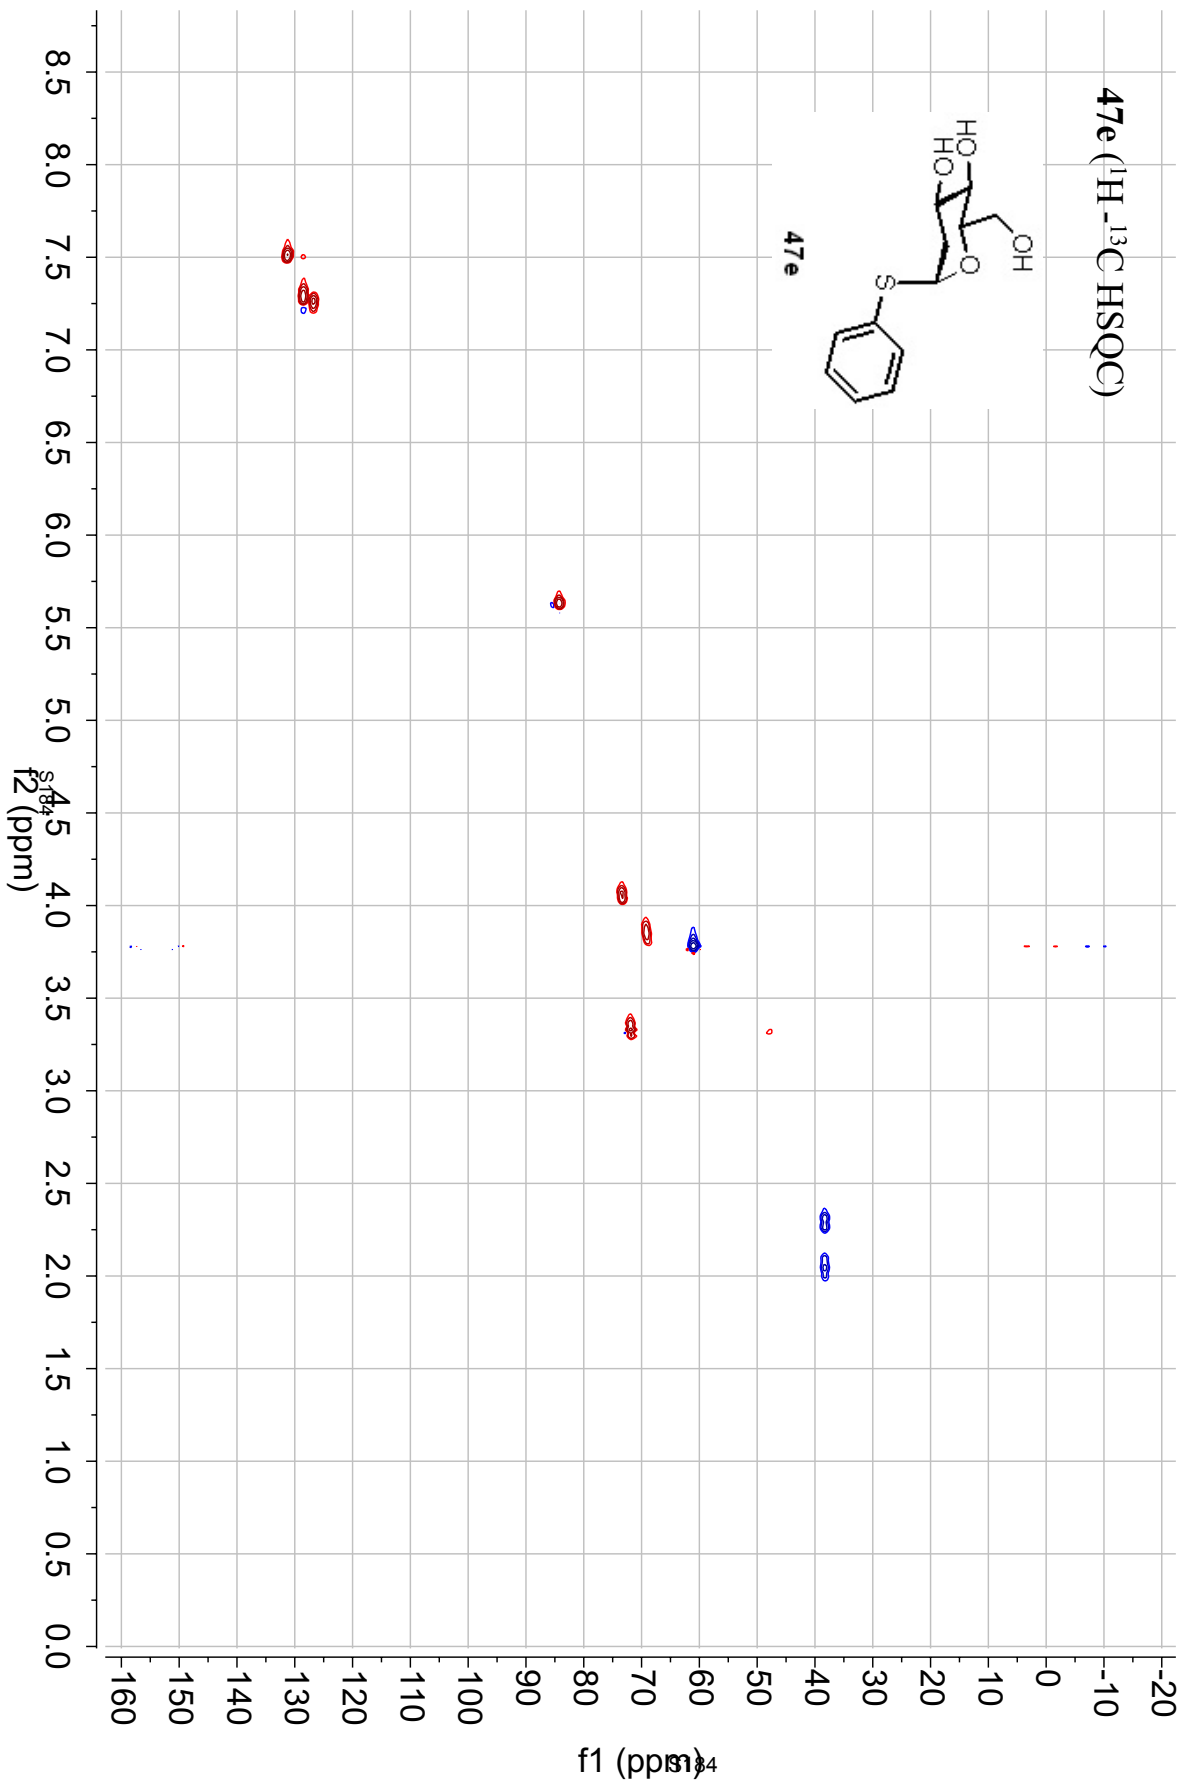



48a (<sup>1</sup>H NMR, 300MHz, CDCl<sub>3</sub>)

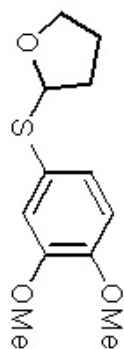

48a

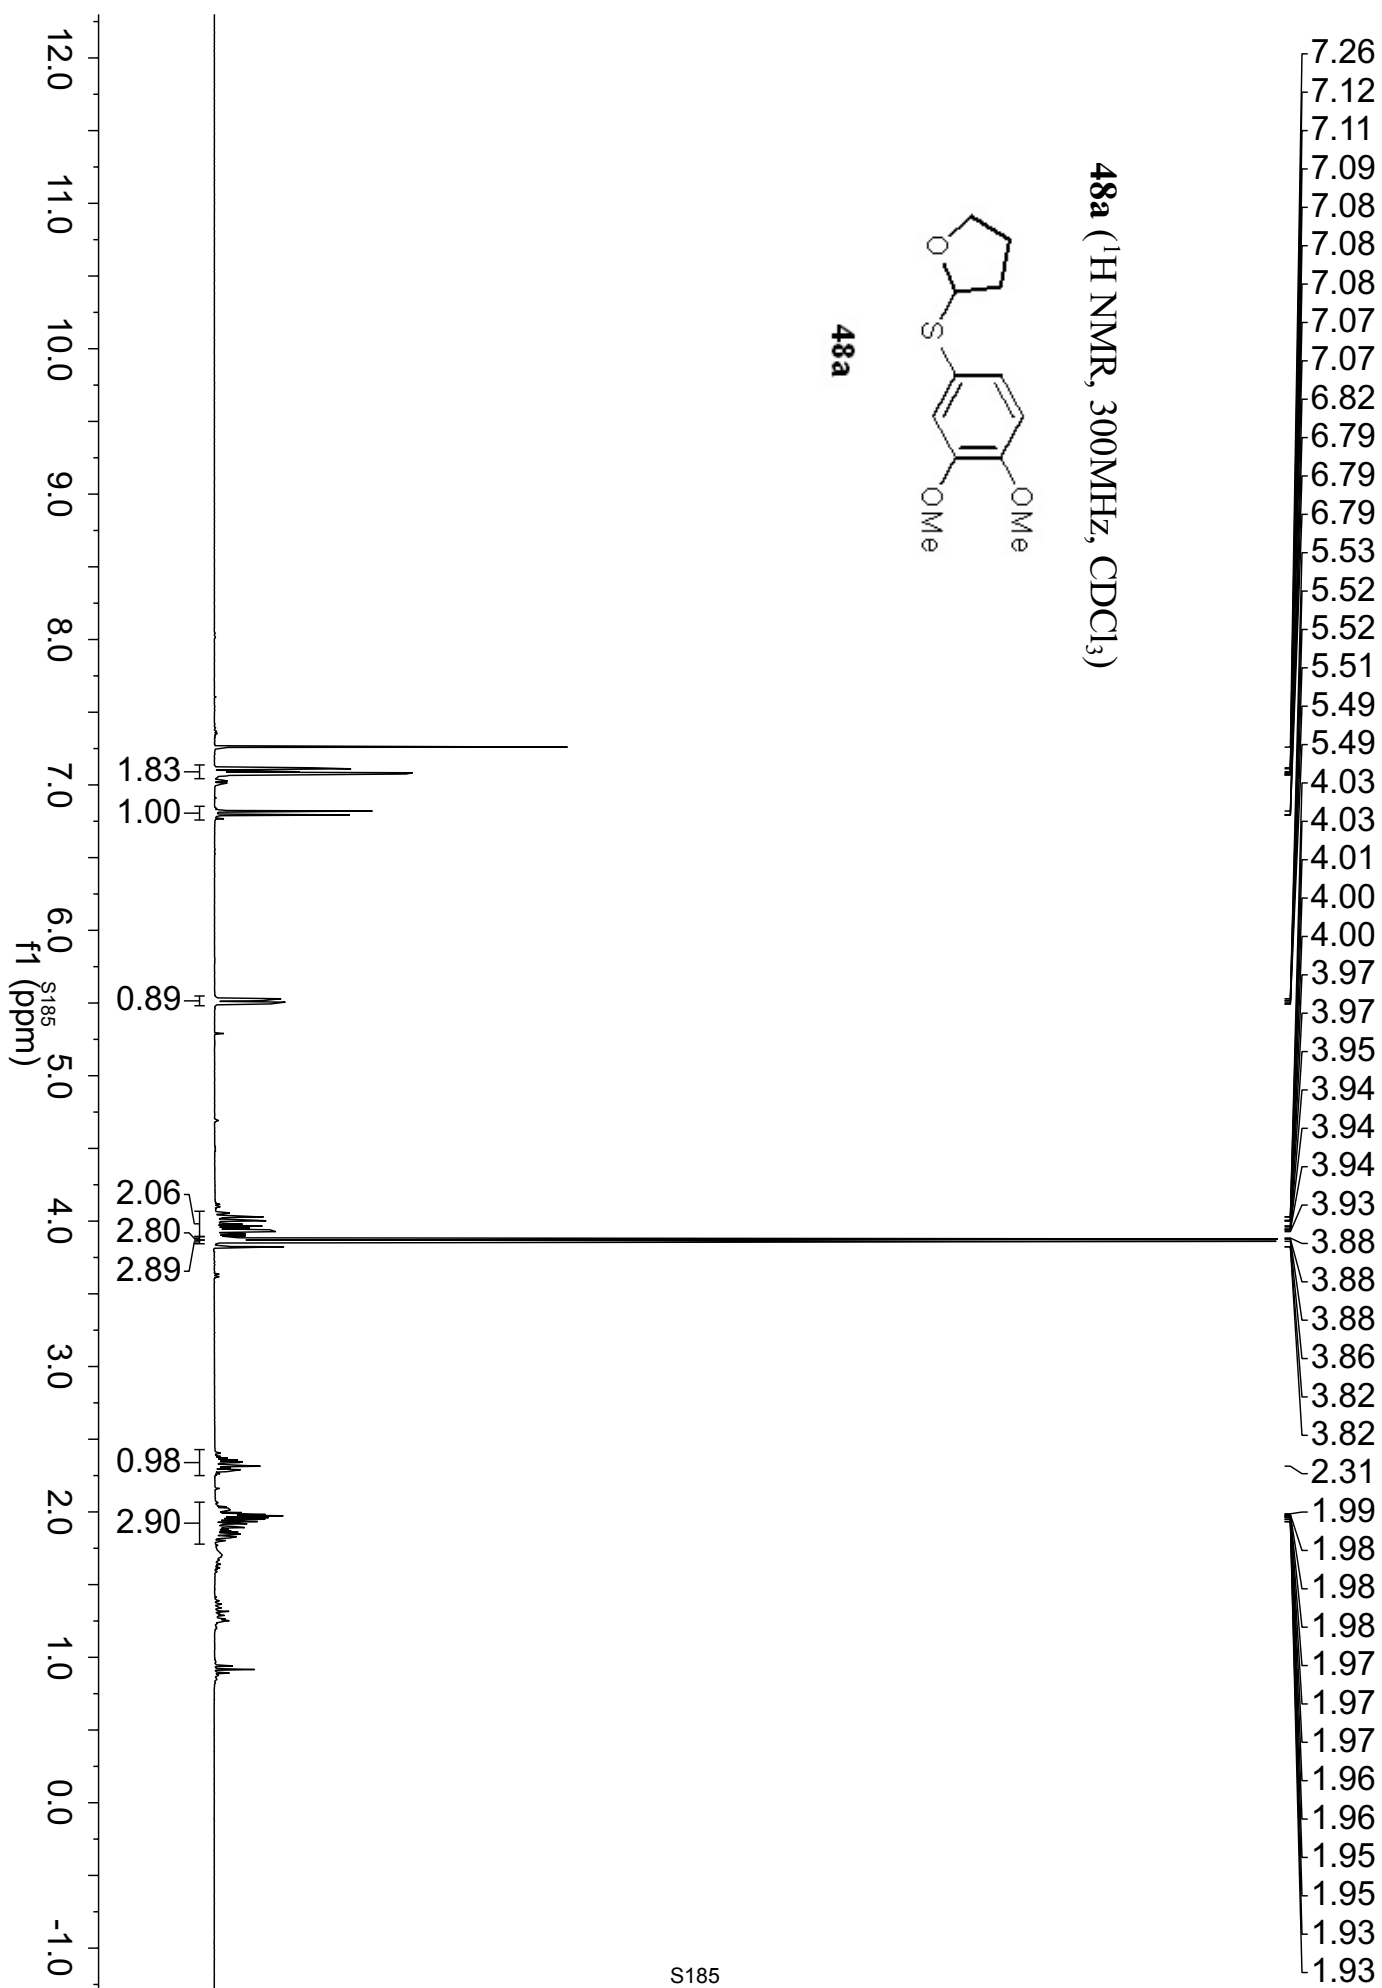

**48a** (<sup>13</sup>C NMR, 75MHz, CDCl<sub>3</sub>)



**48a**

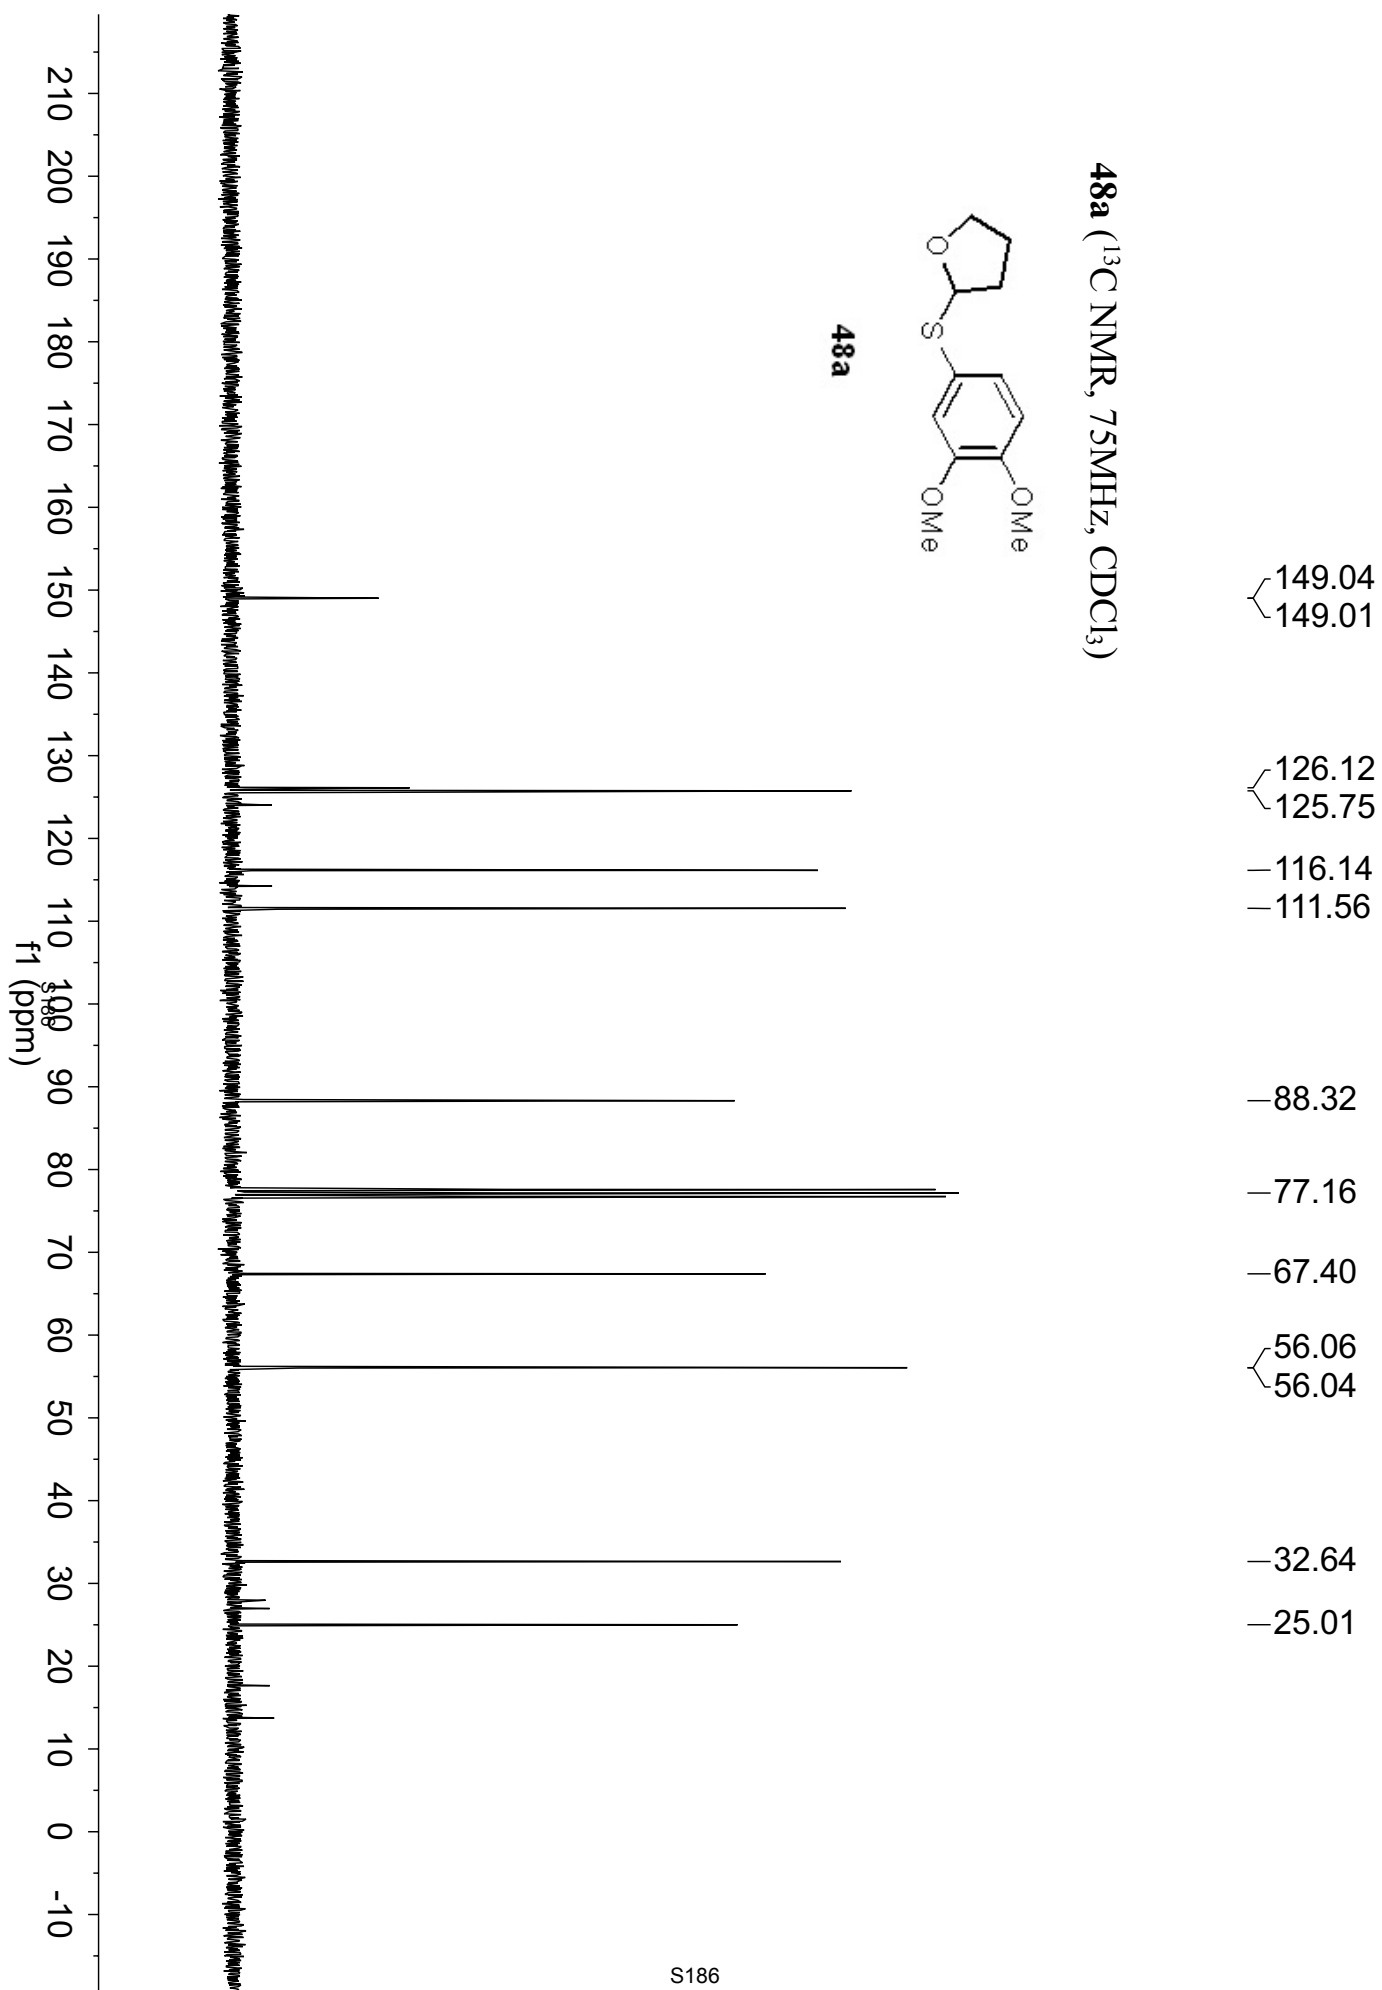

48b (<sup>1</sup>H NMR, 300MHz, CDCl<sub>3</sub>)

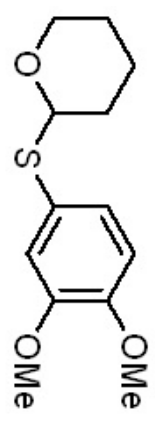

48b

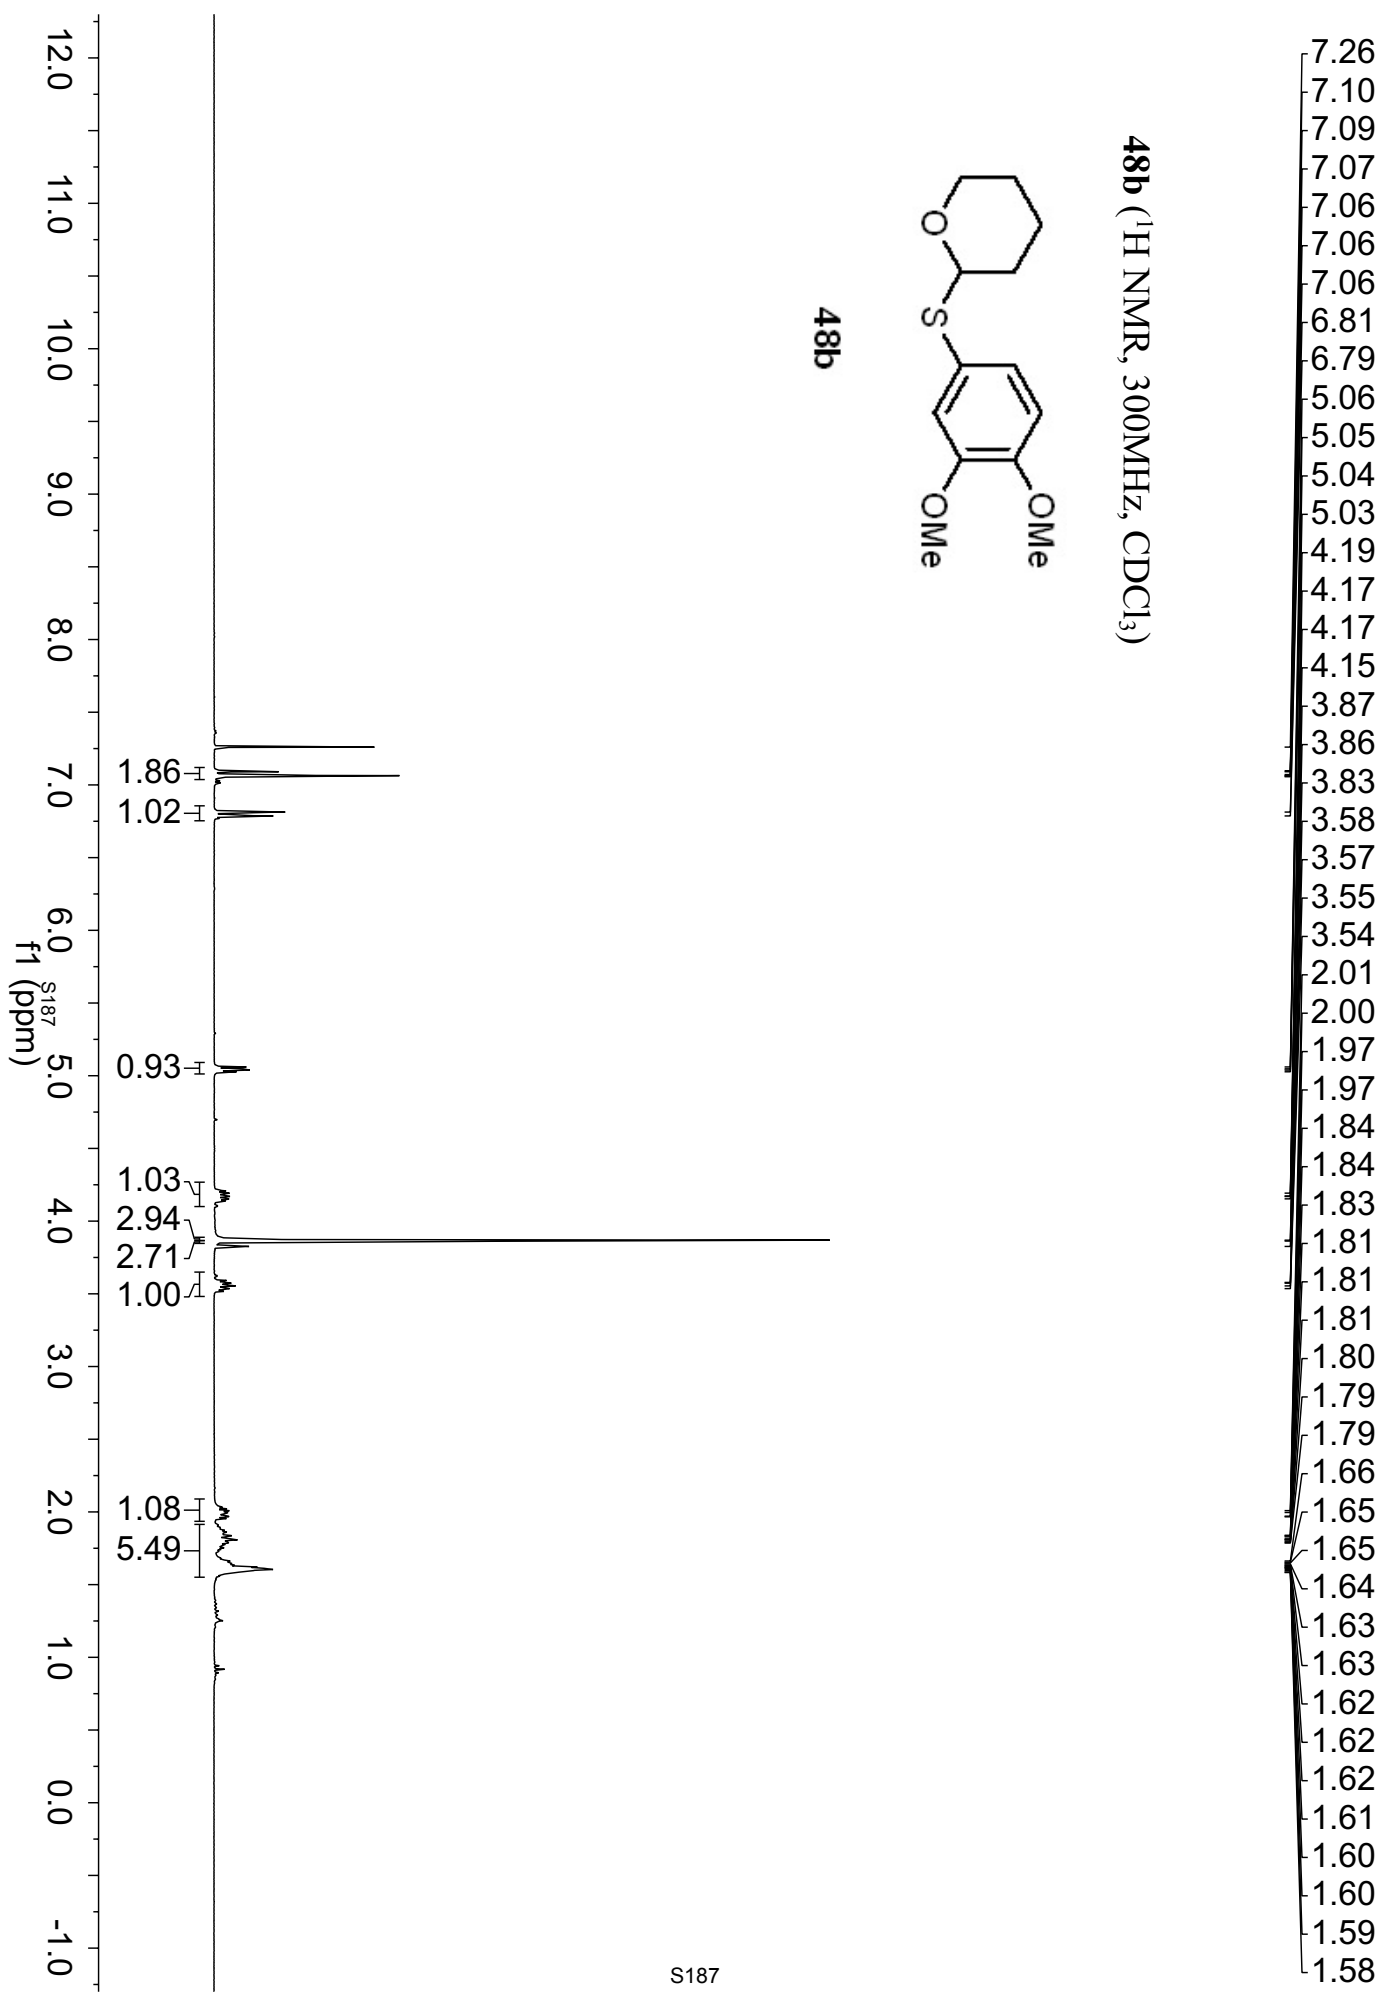

**48b** ( $^{13}\text{C}$  NMR, 75MHz,  $\text{CDCl}_3$ )

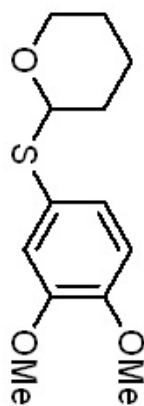

**48b**

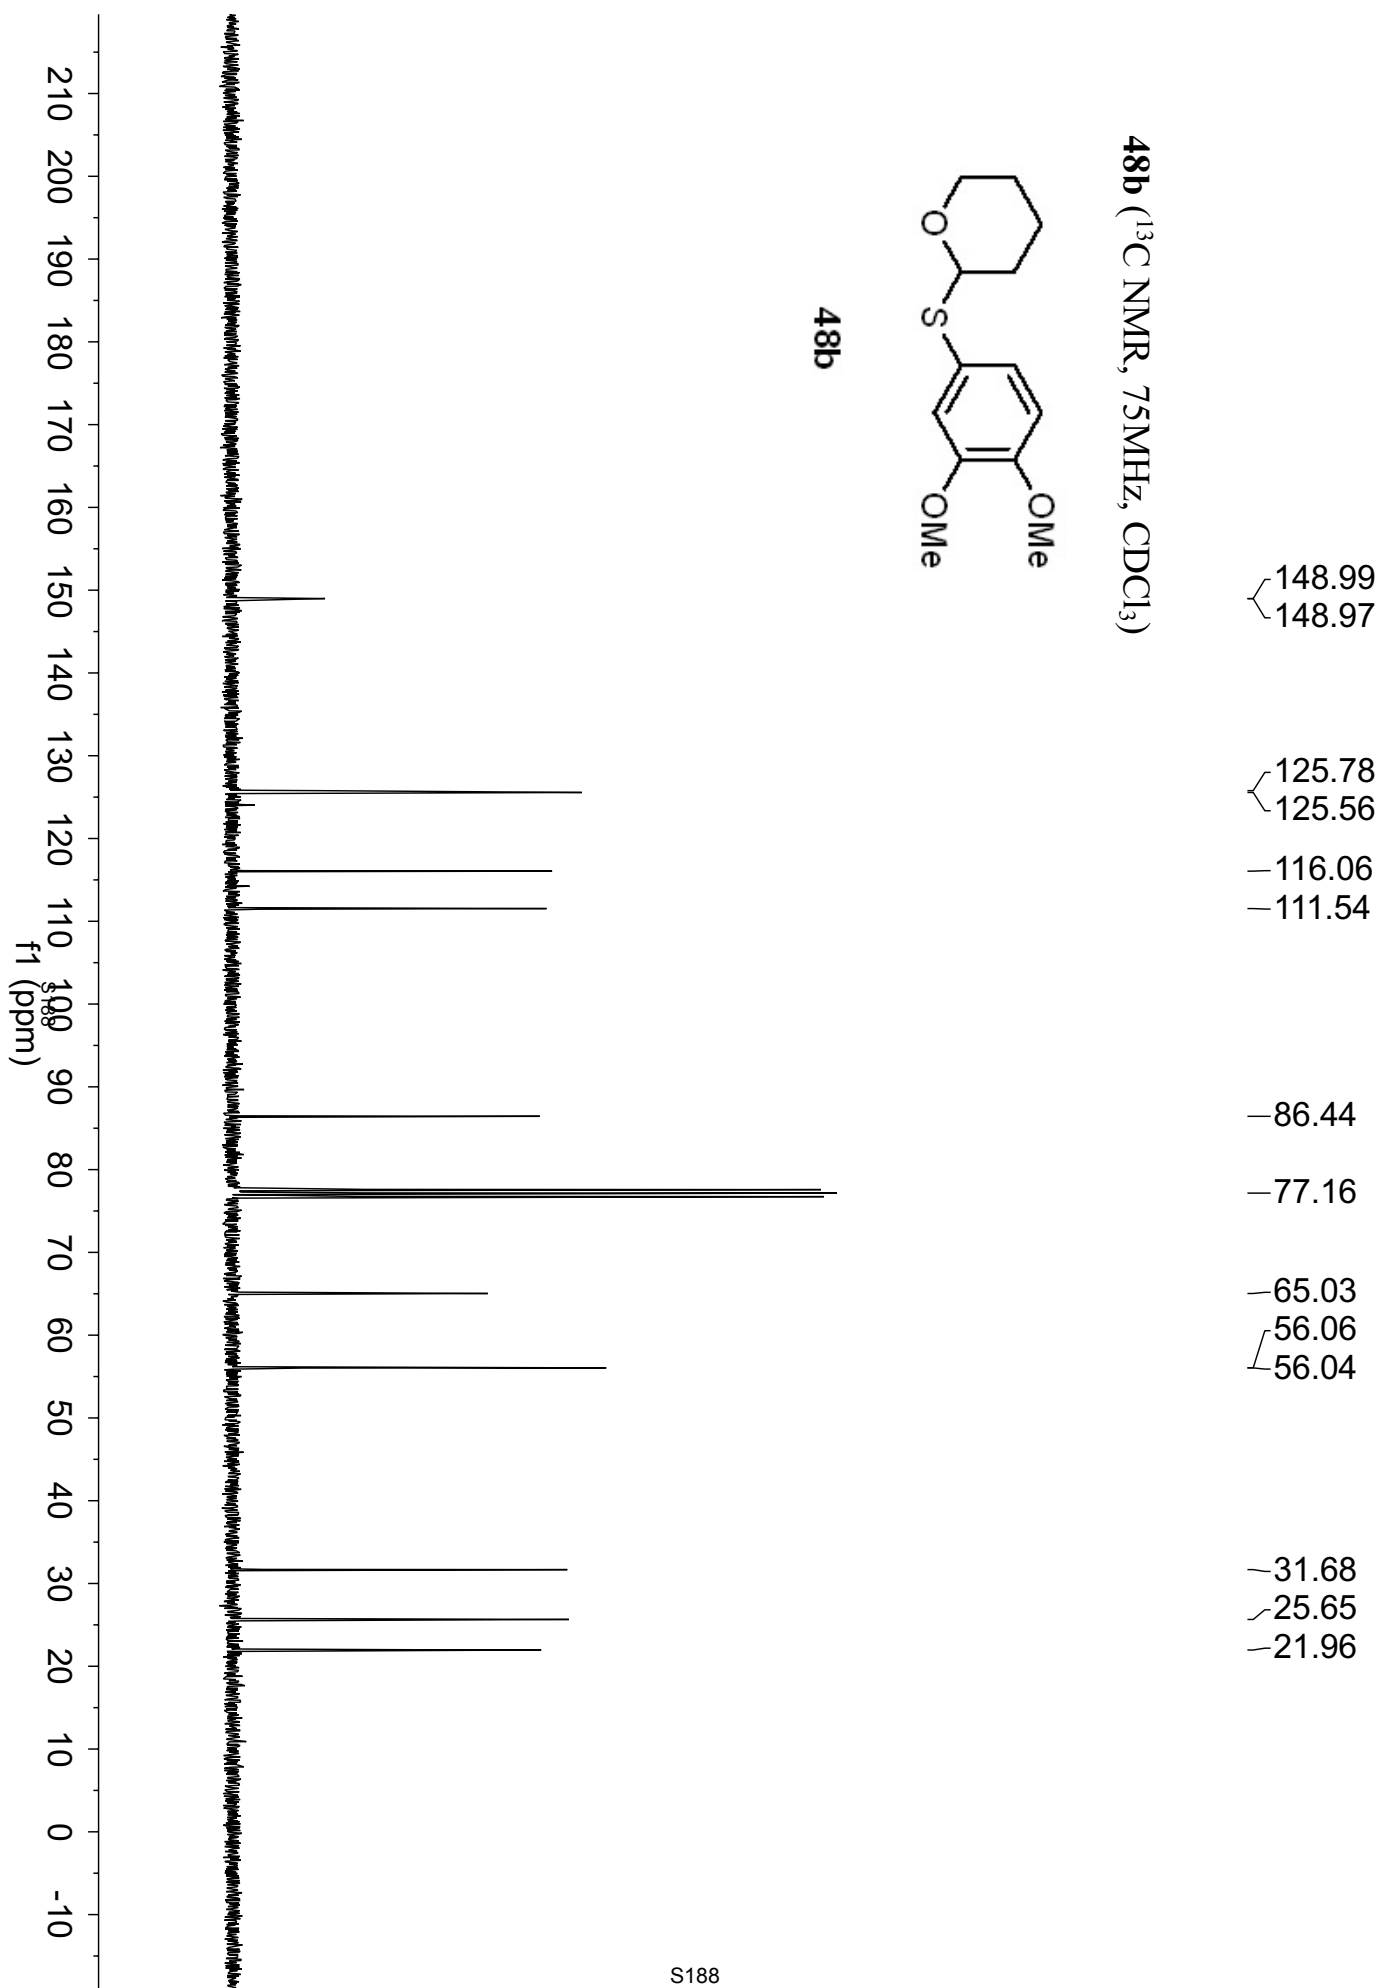

48c (<sup>1</sup>H NMR, 300MHz, CDCl<sub>3</sub>)

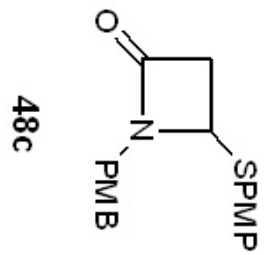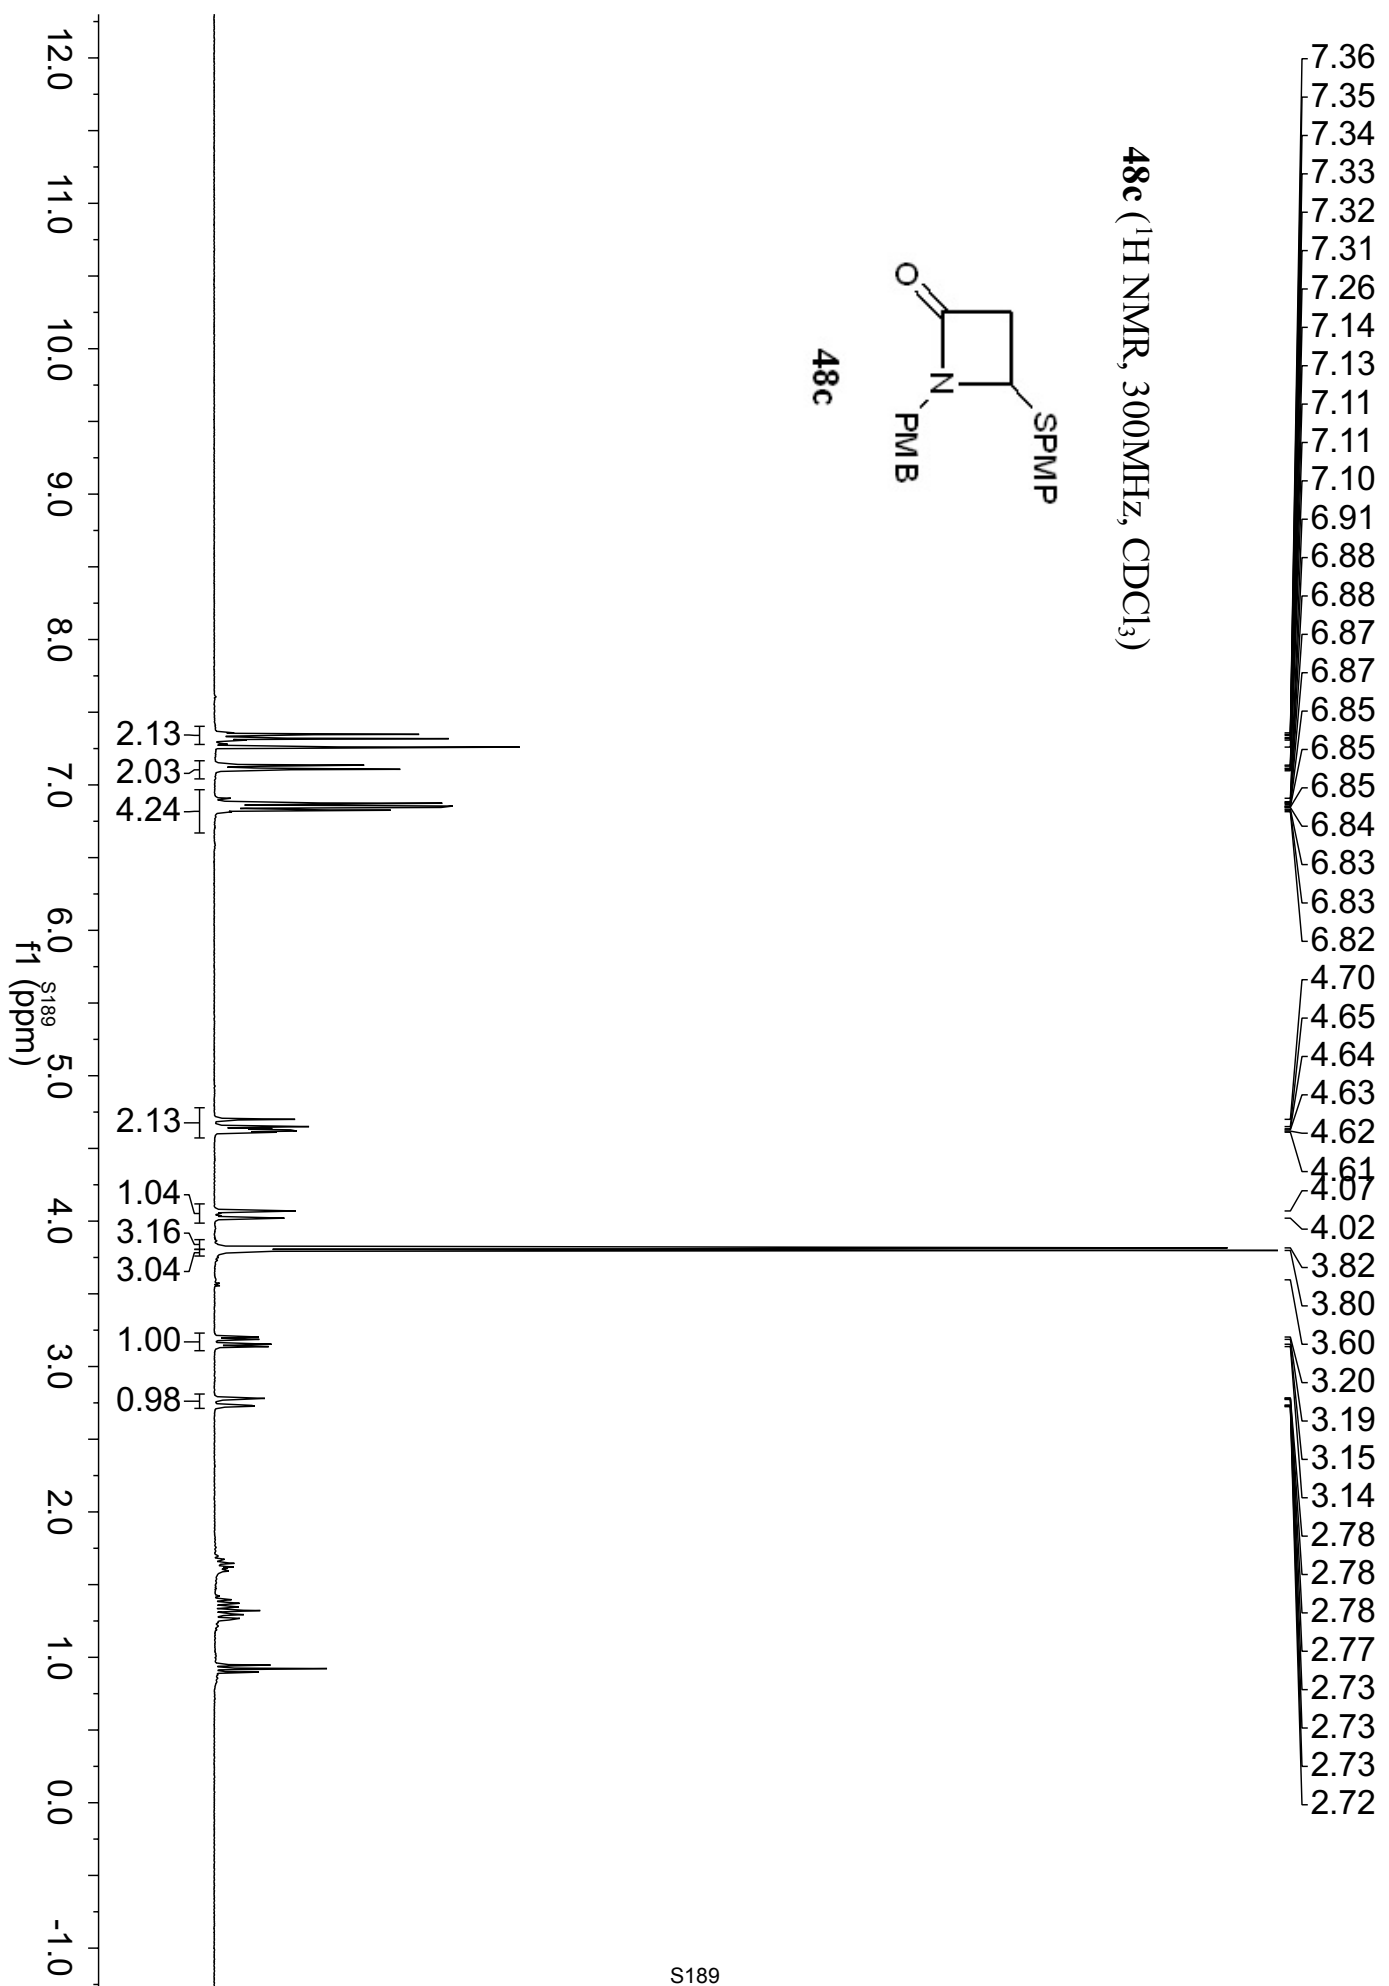

**48c** ( $^{13}\text{C}$  NMR, 75MHz,  $\text{CDCl}_3$ )

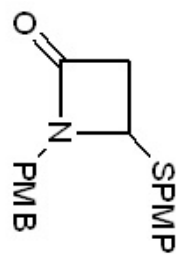

48c

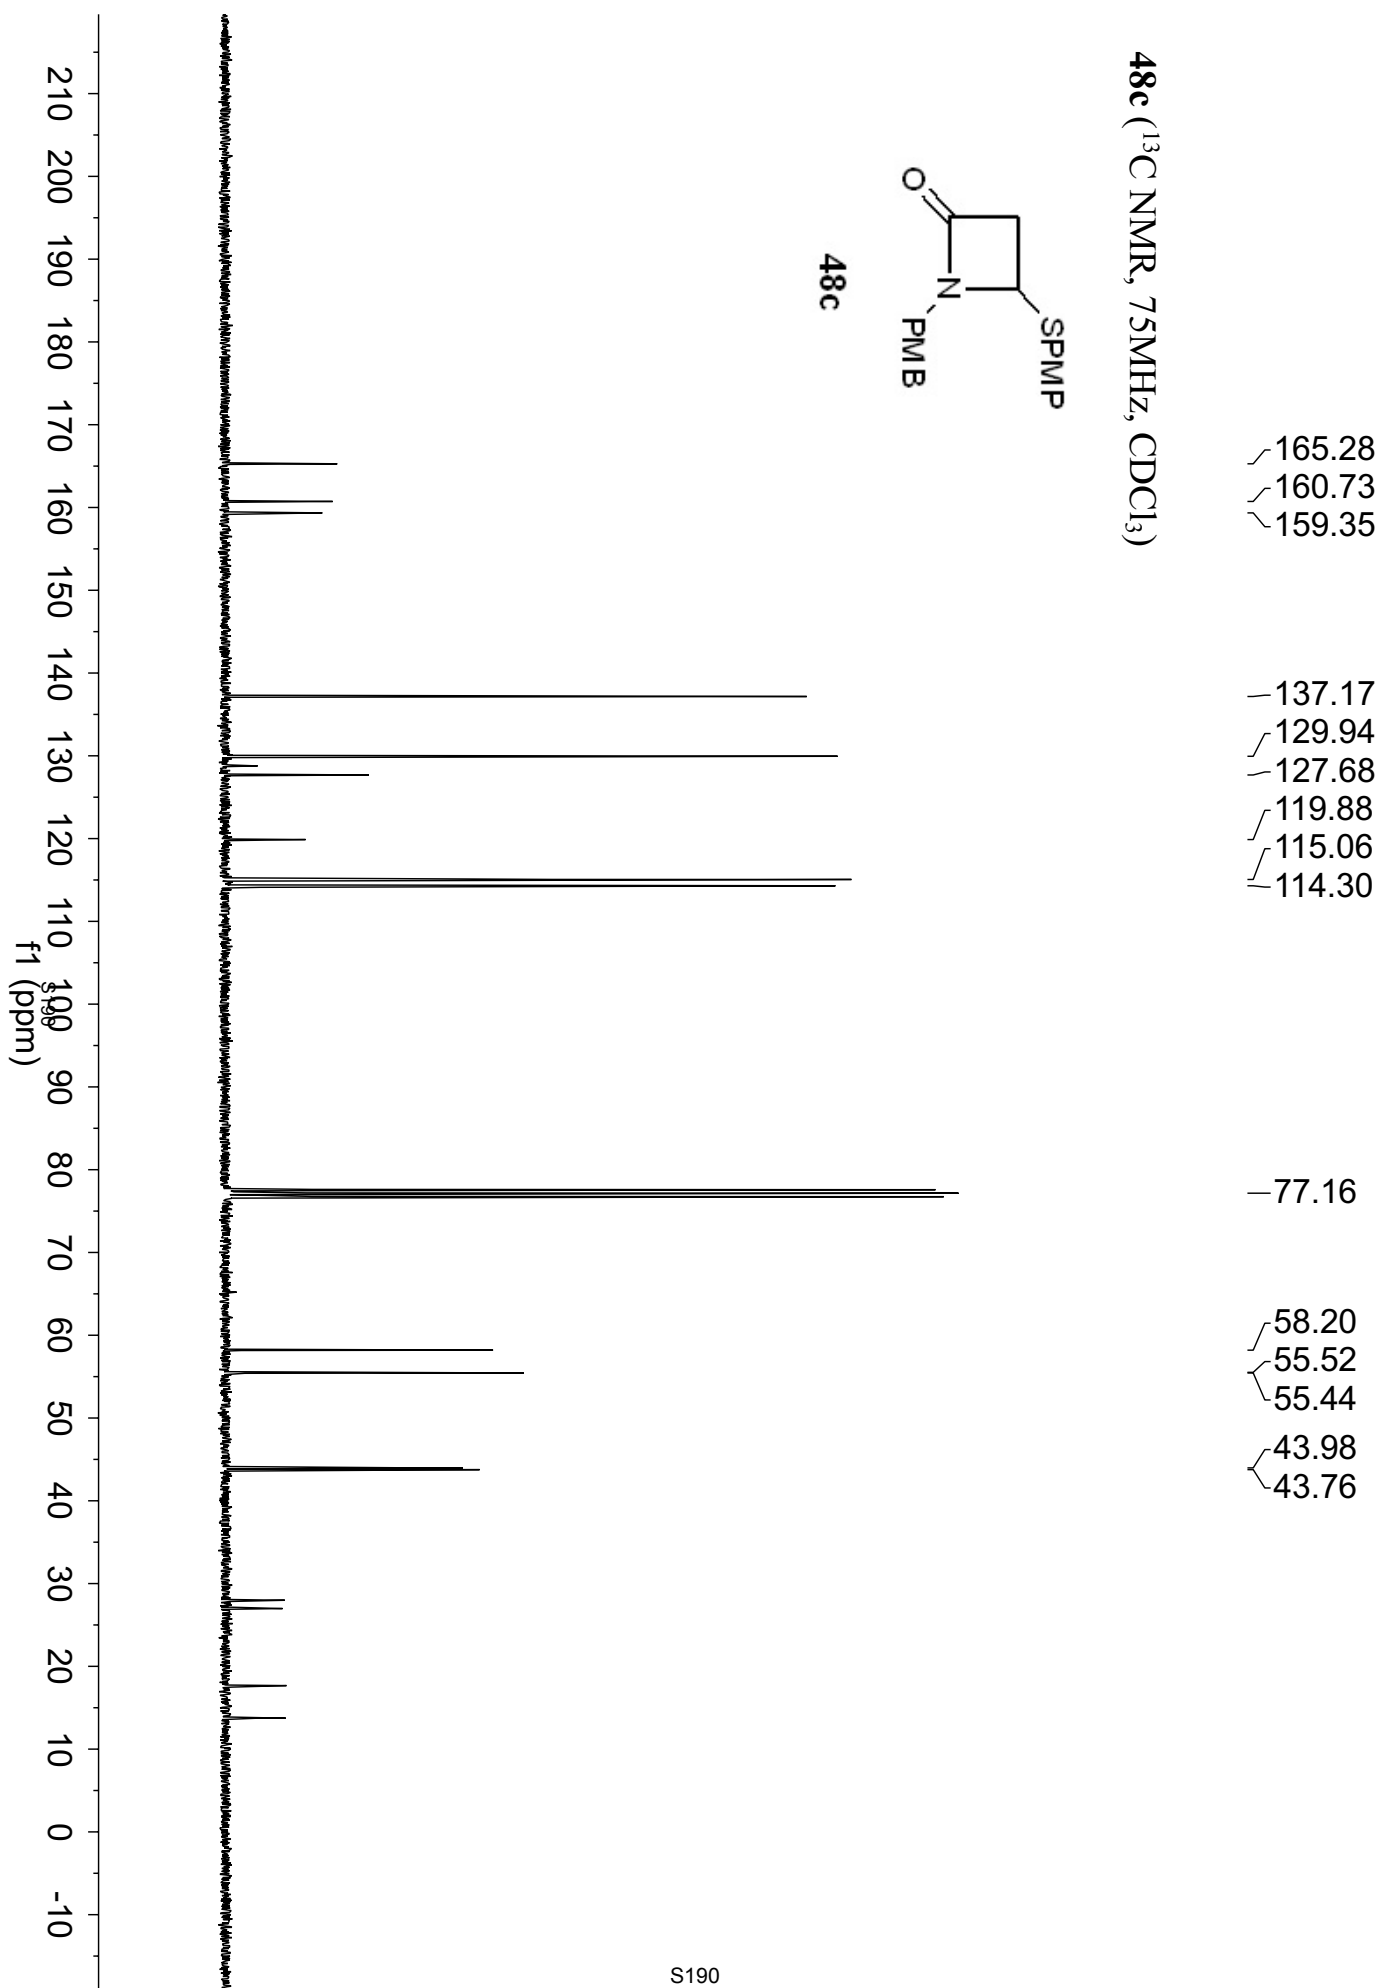

**48d** ( $^1\text{H}$  NMR, 300MHz,  $\text{CDCl}_3$ )

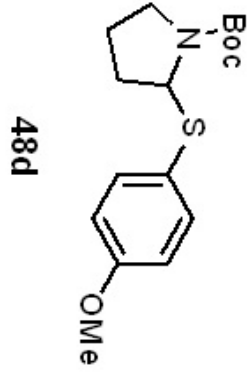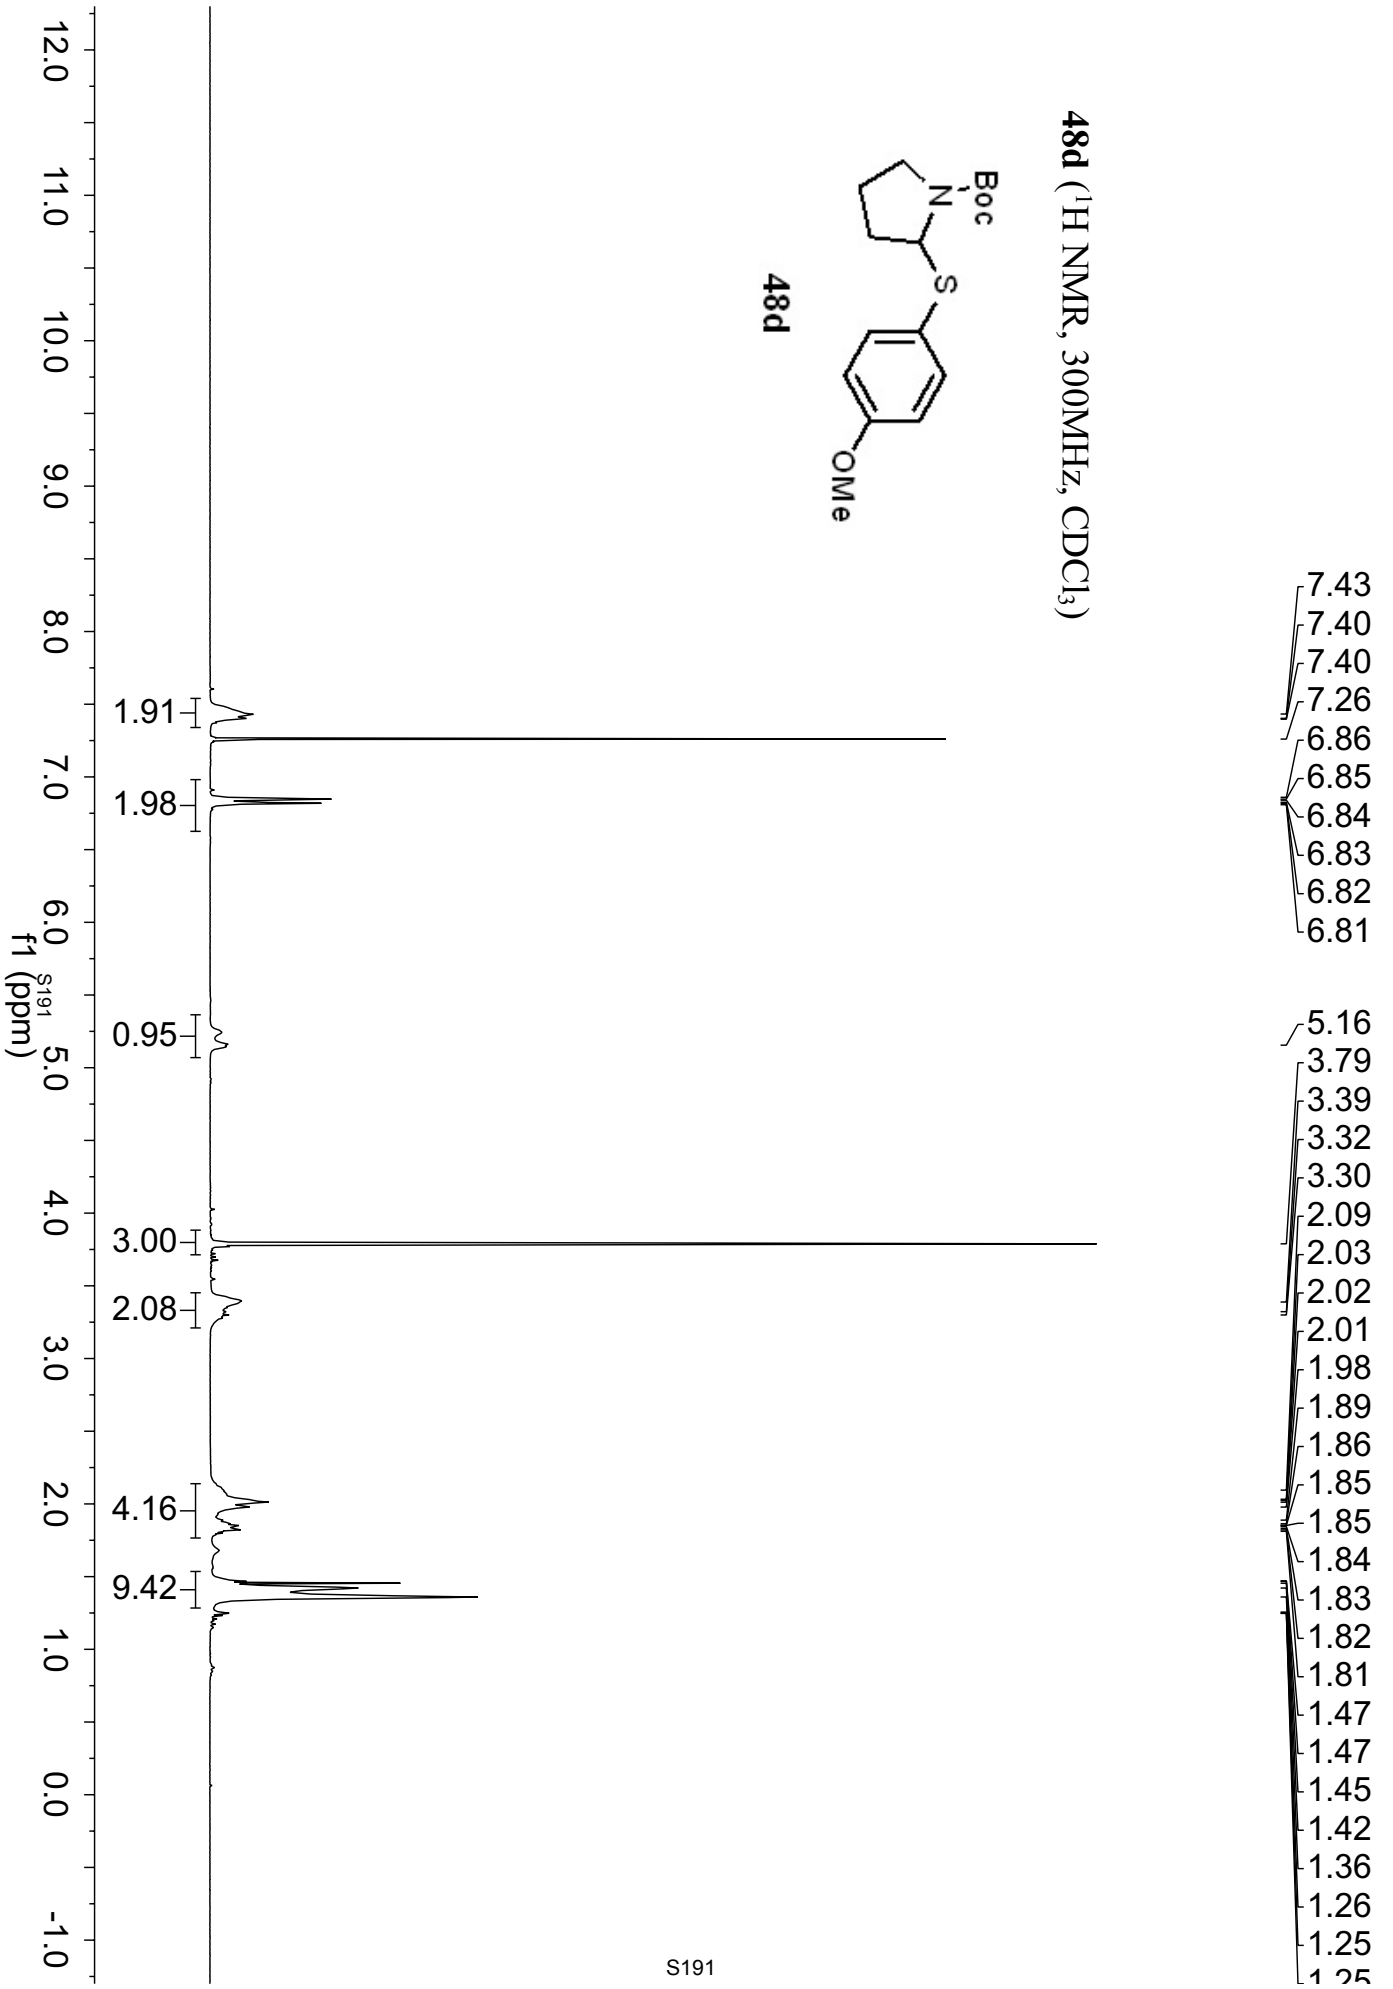

<sup>13</sup>C NMR (75 MHz, CDCl<sub>3</sub>) δ 22.3, 28.4, 33.6, 45.6, 55.4, 67.1, 80.0, 80.4, 114.6, 124.8, 137.2, 153.7, 199.1.

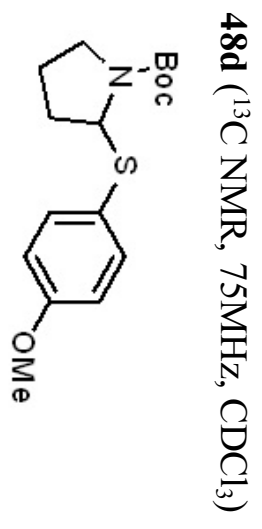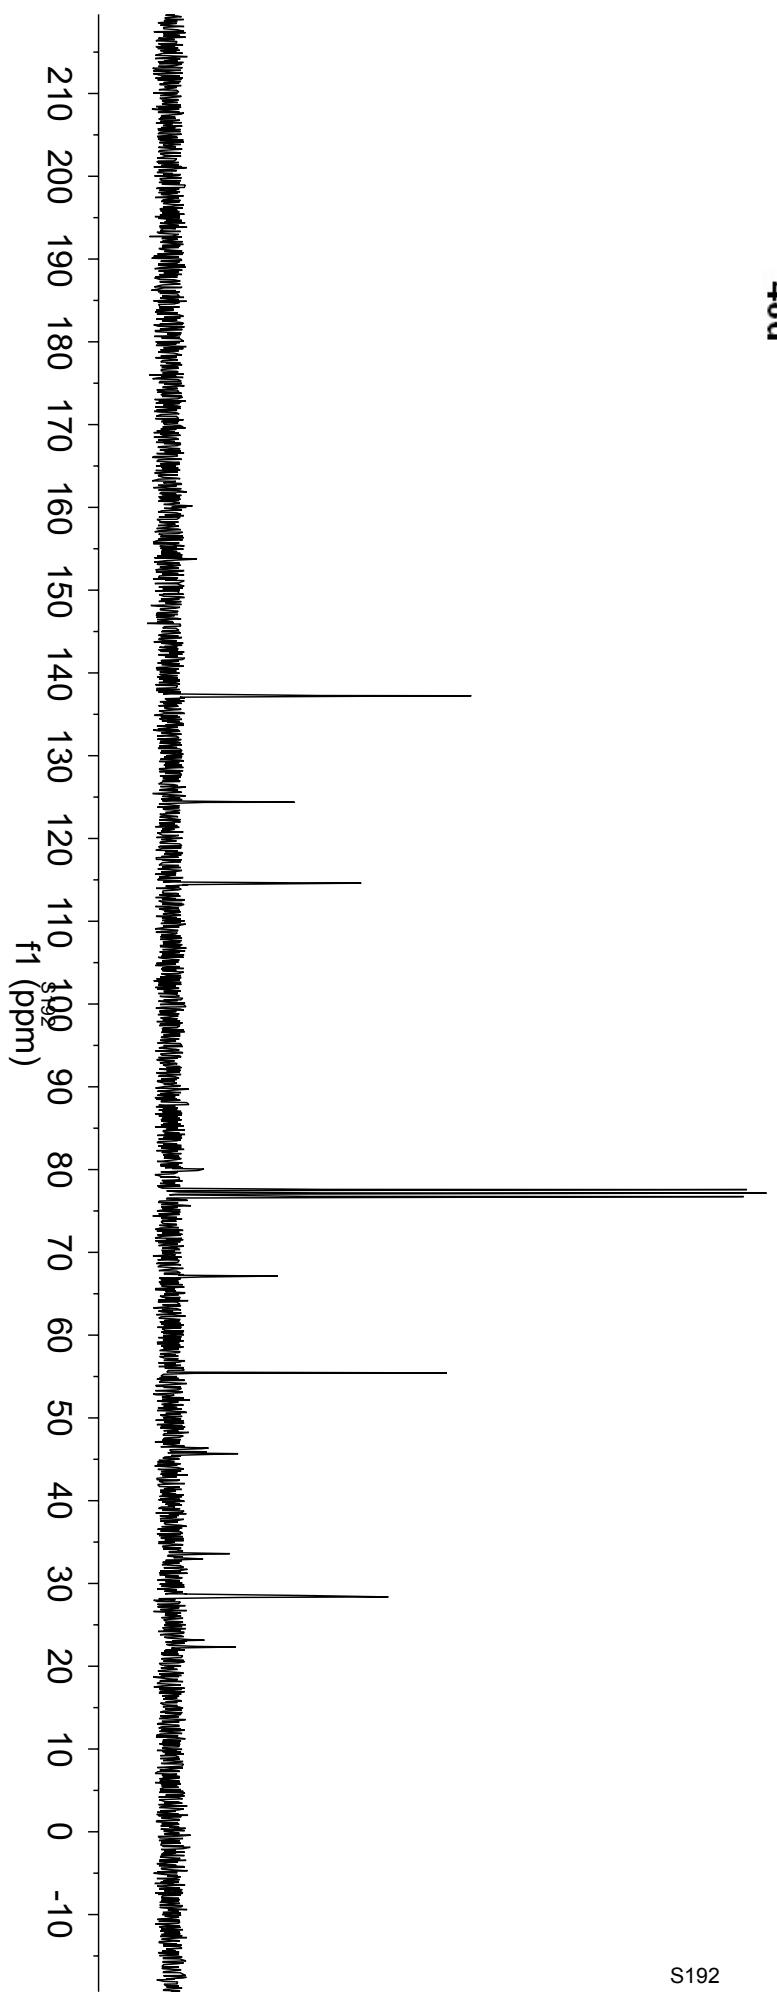



**51** (<sup>1</sup>H NMR, 300MHz, CDCl<sub>3</sub>)

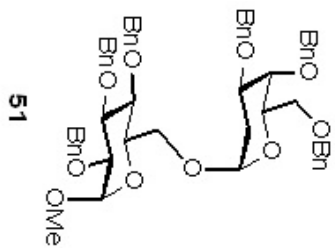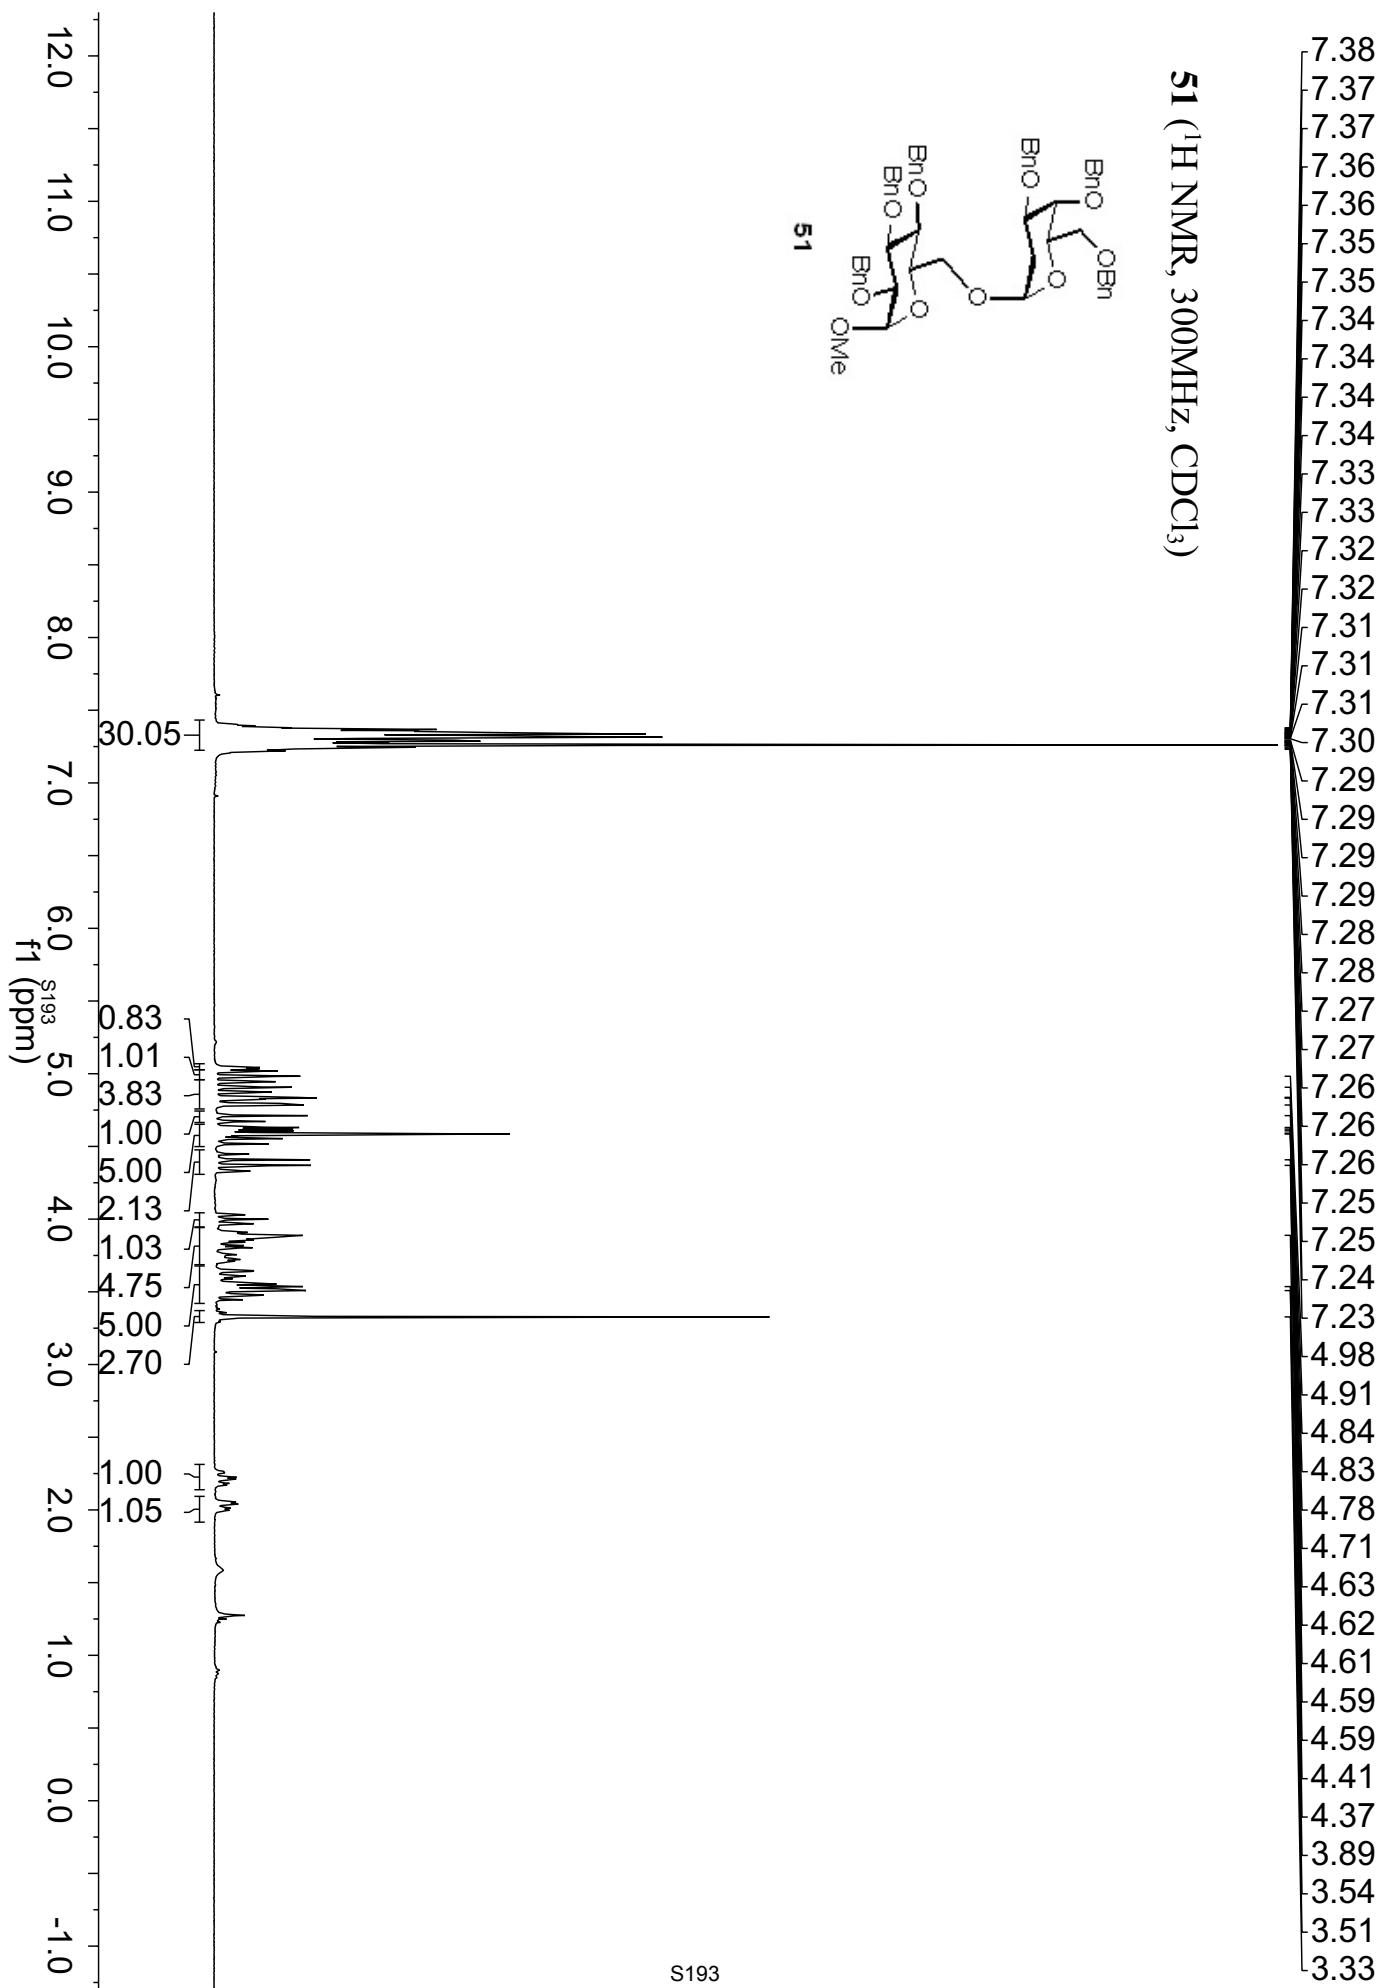

**51** ( $^{13}\text{C}$  NMR, 75MHz,  $\text{CDCl}_3$ )

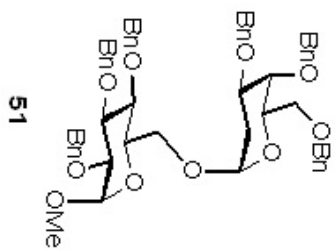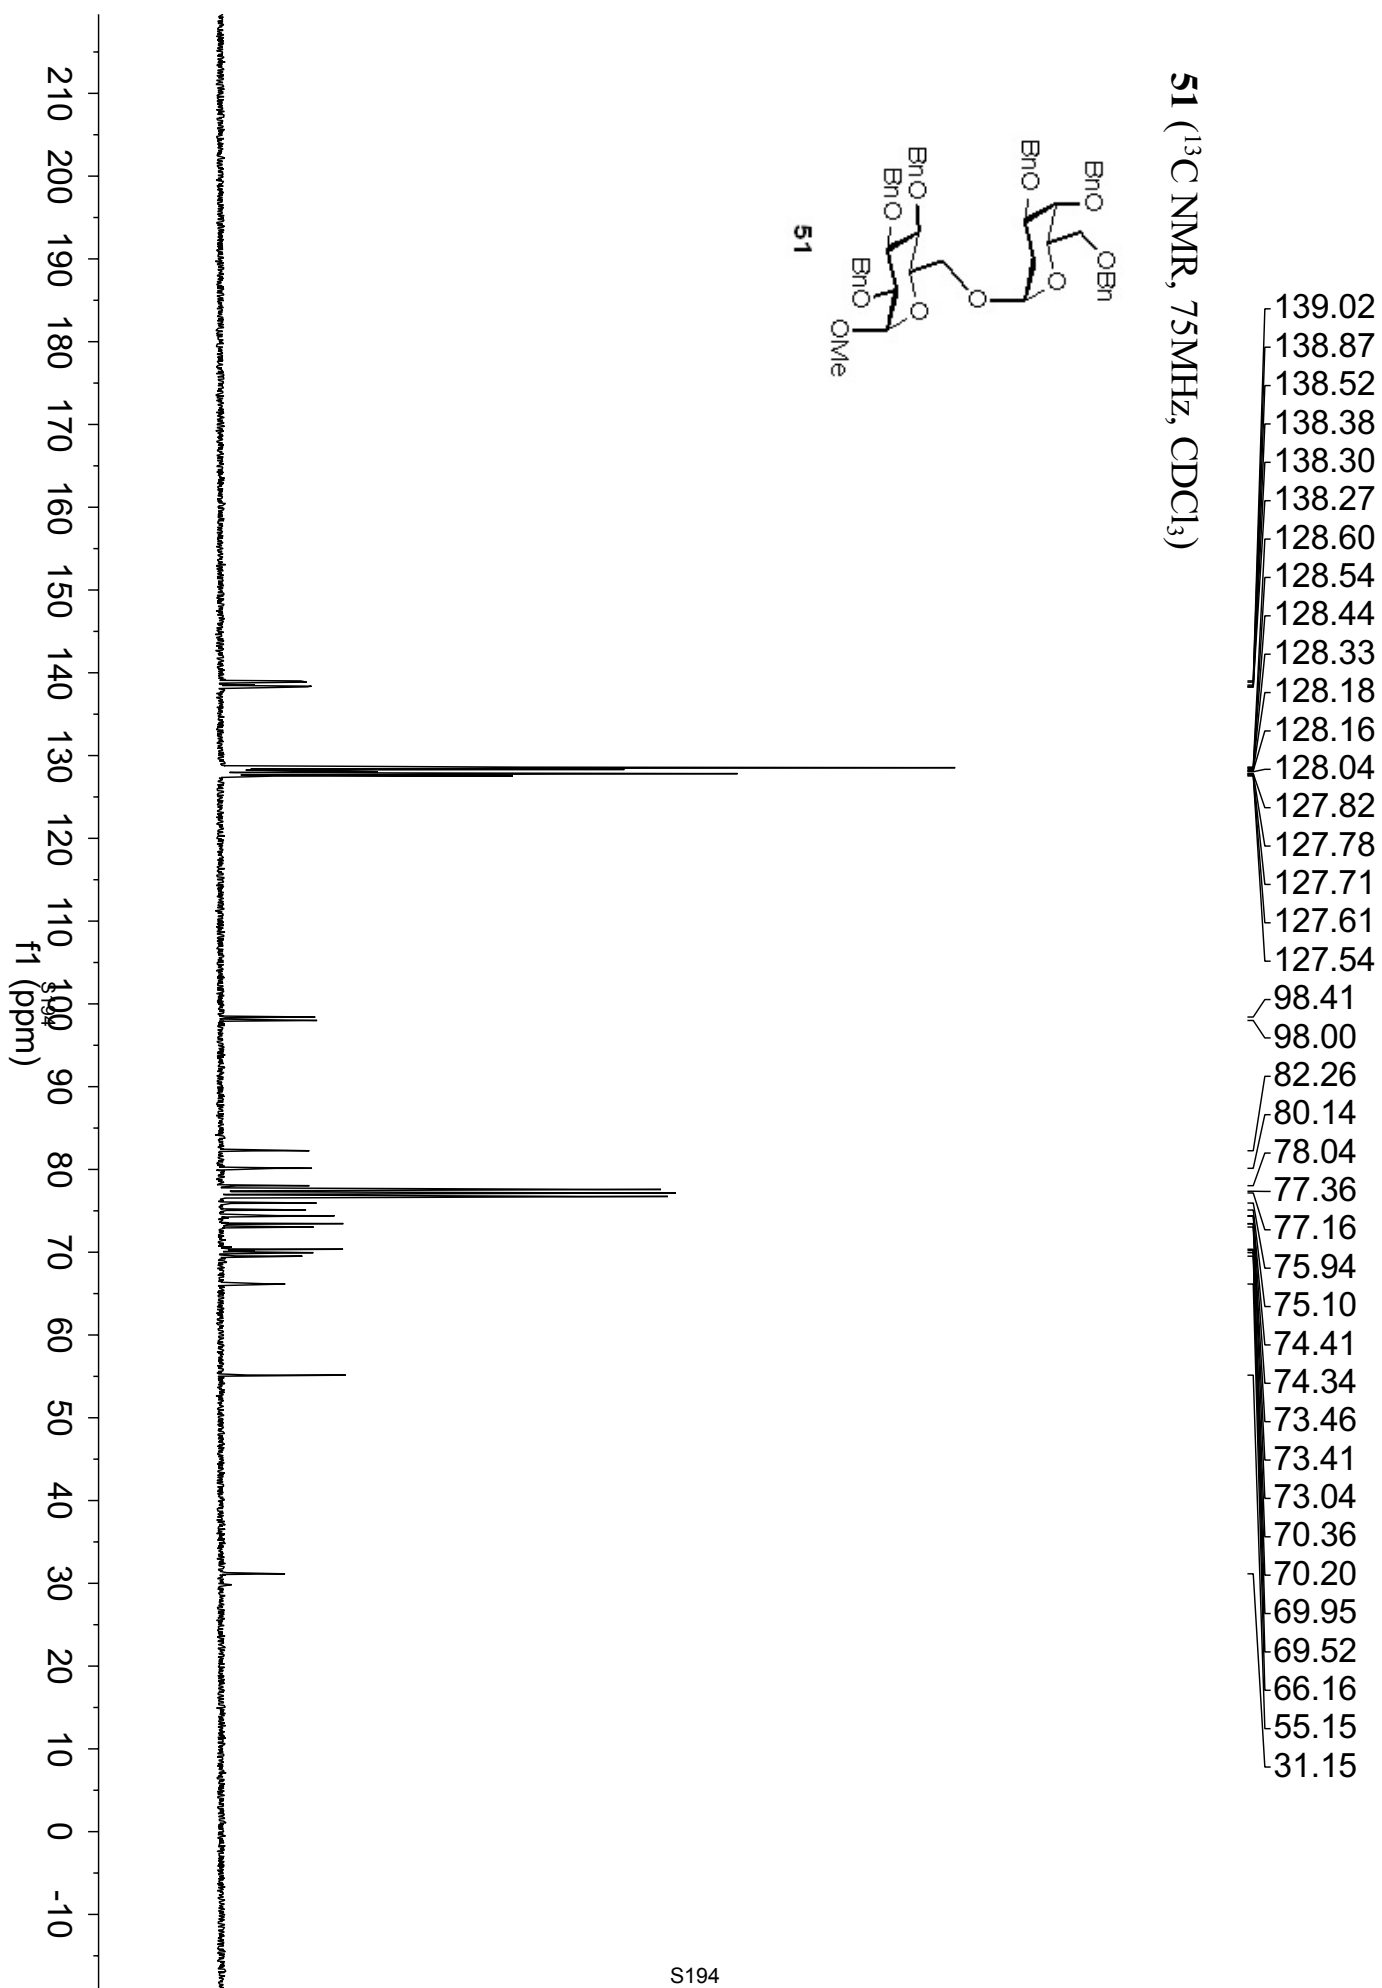

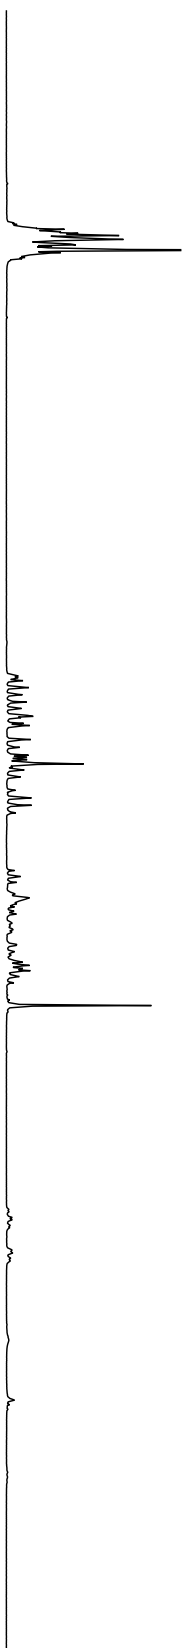

**51** ( $^1\text{H}$ - $^{13}\text{C}$  Coupled HSQC)

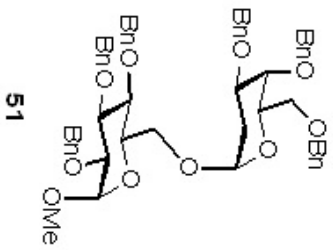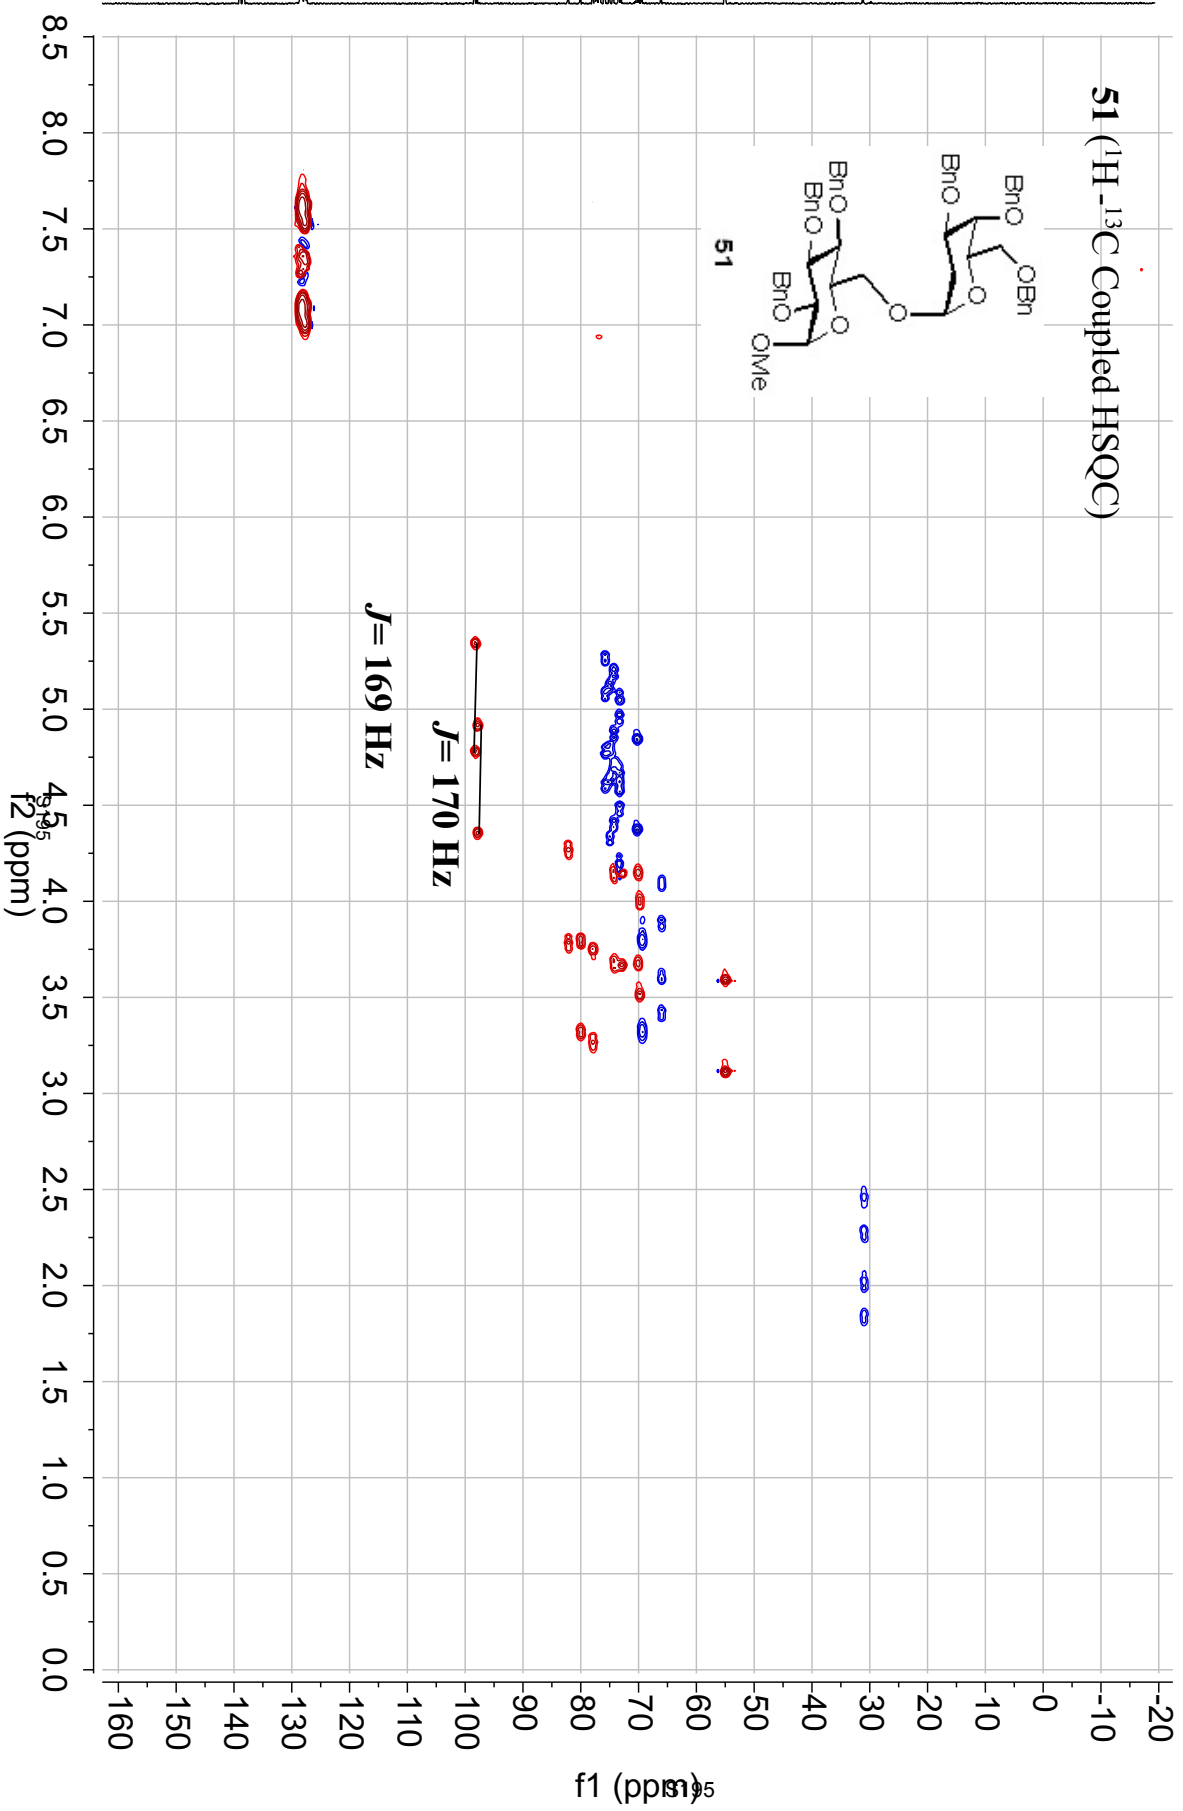



**51** ( $^1\text{H}$ - $^{13}\text{C}$  HSQC)

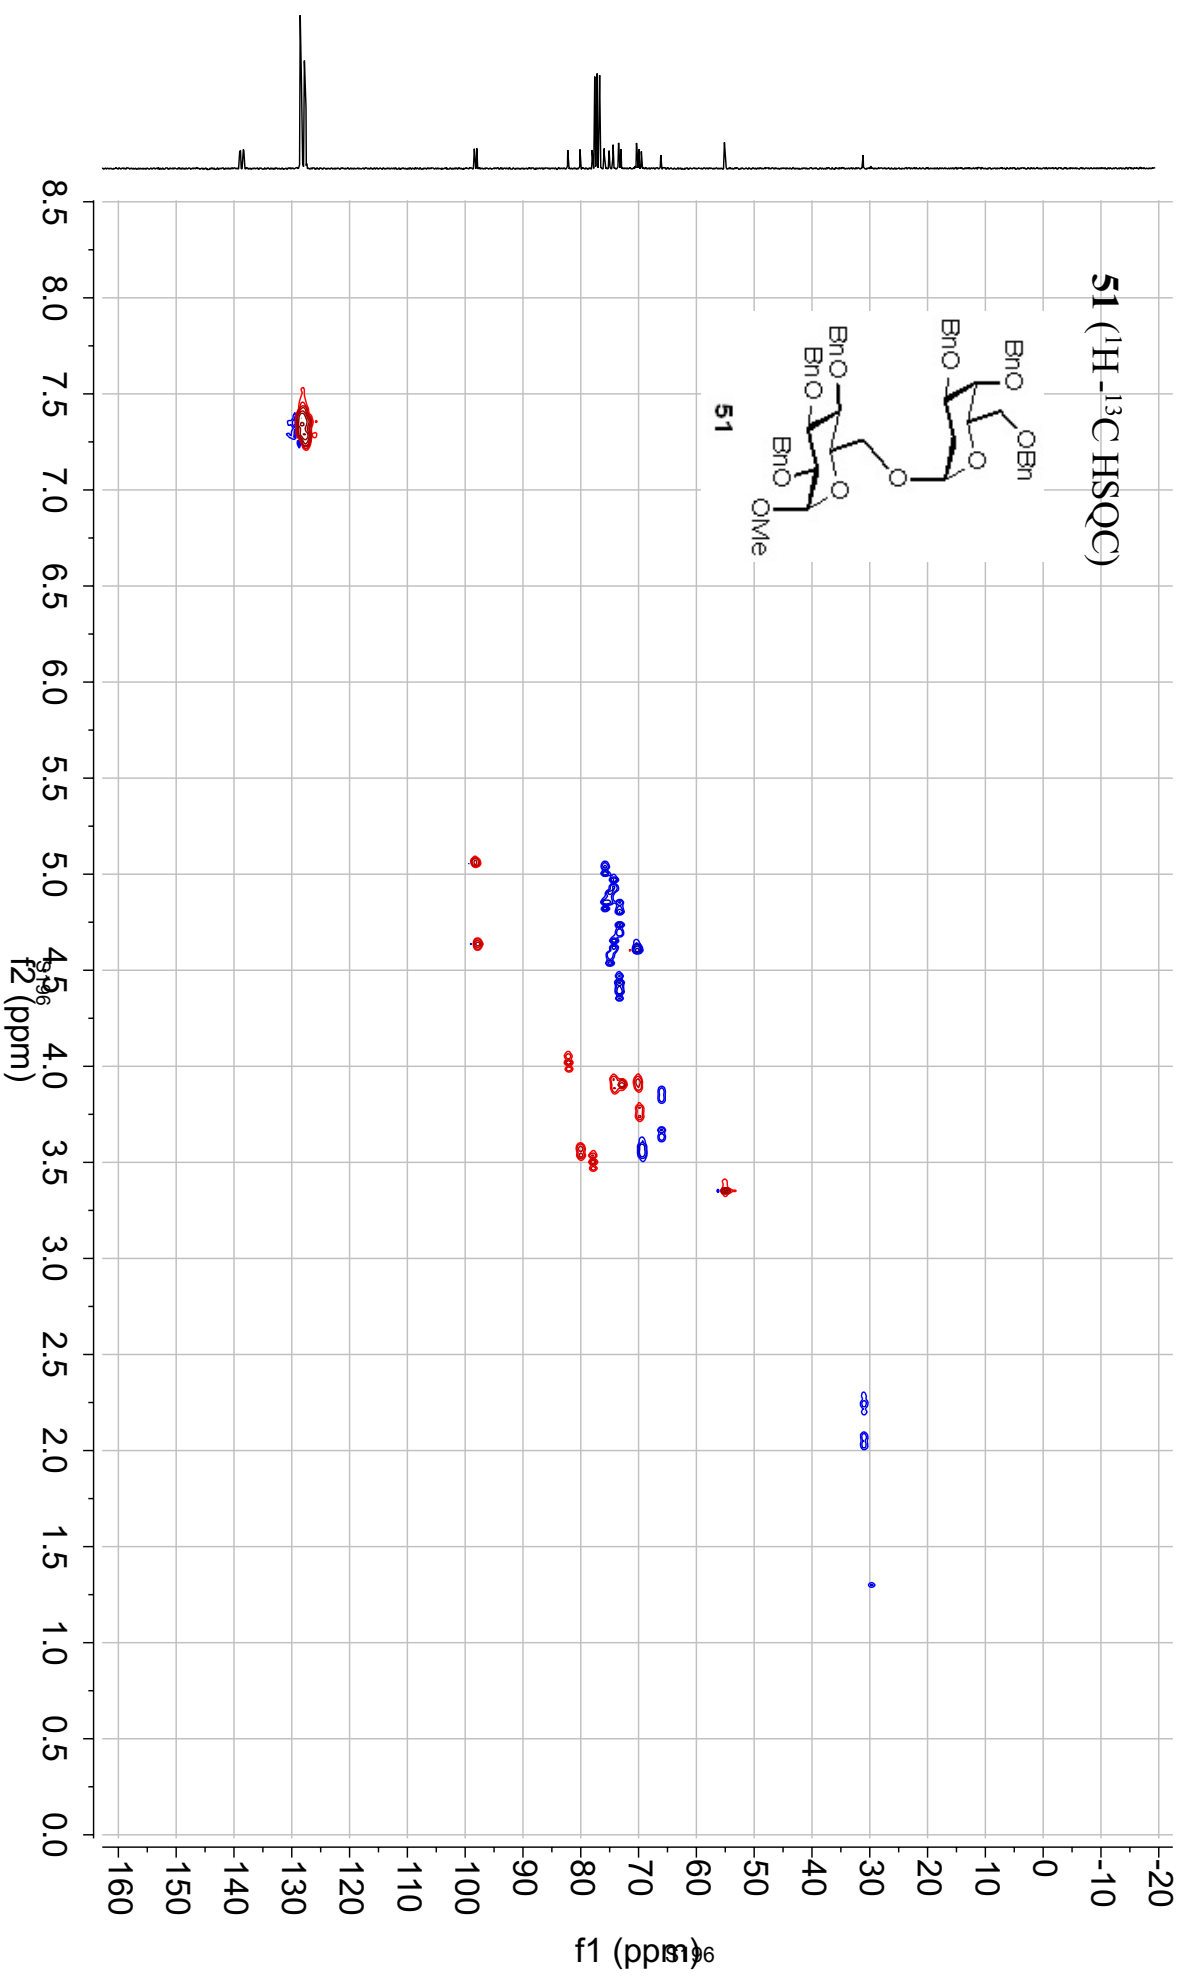

S1 (<sup>1</sup>H NMR, 300MHz, CDCl<sub>3</sub>)

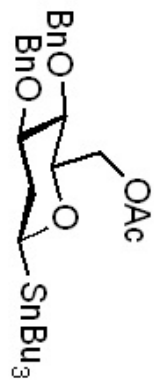

S1

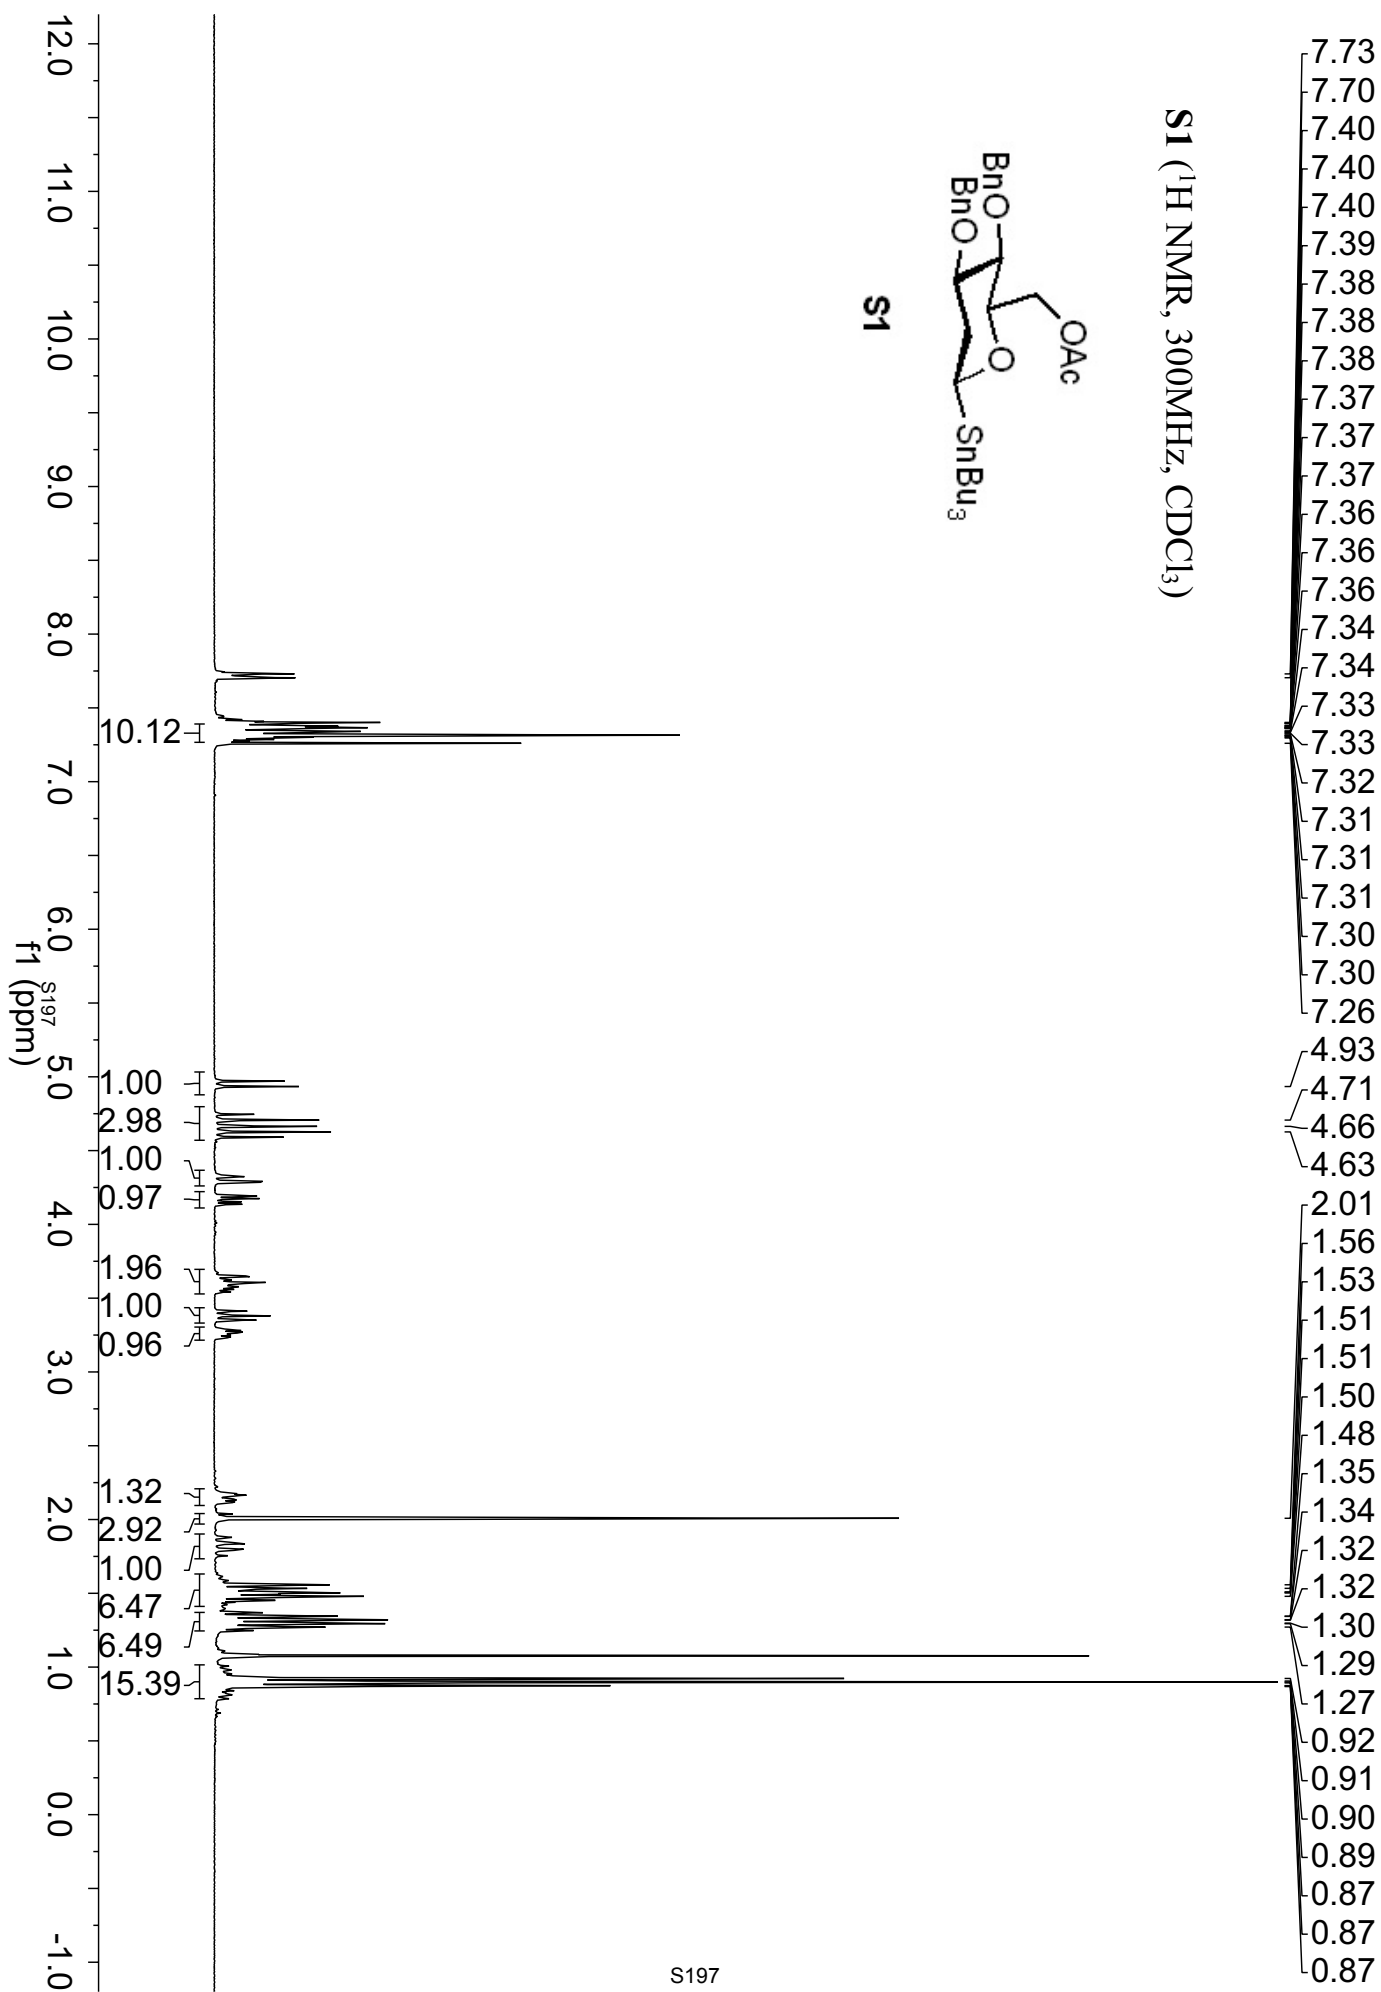



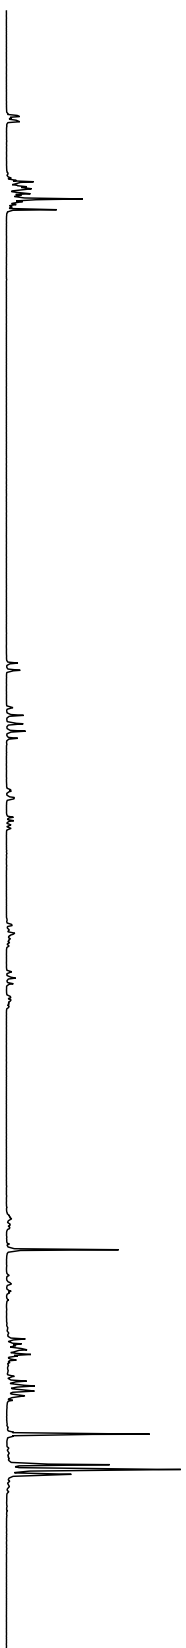

**S1** ( $^1\text{H}$ - $^{13}\text{C}$  Coupled HSQC)

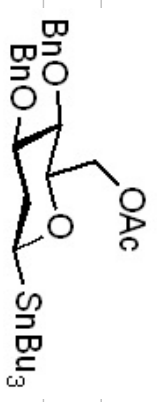

**S1**

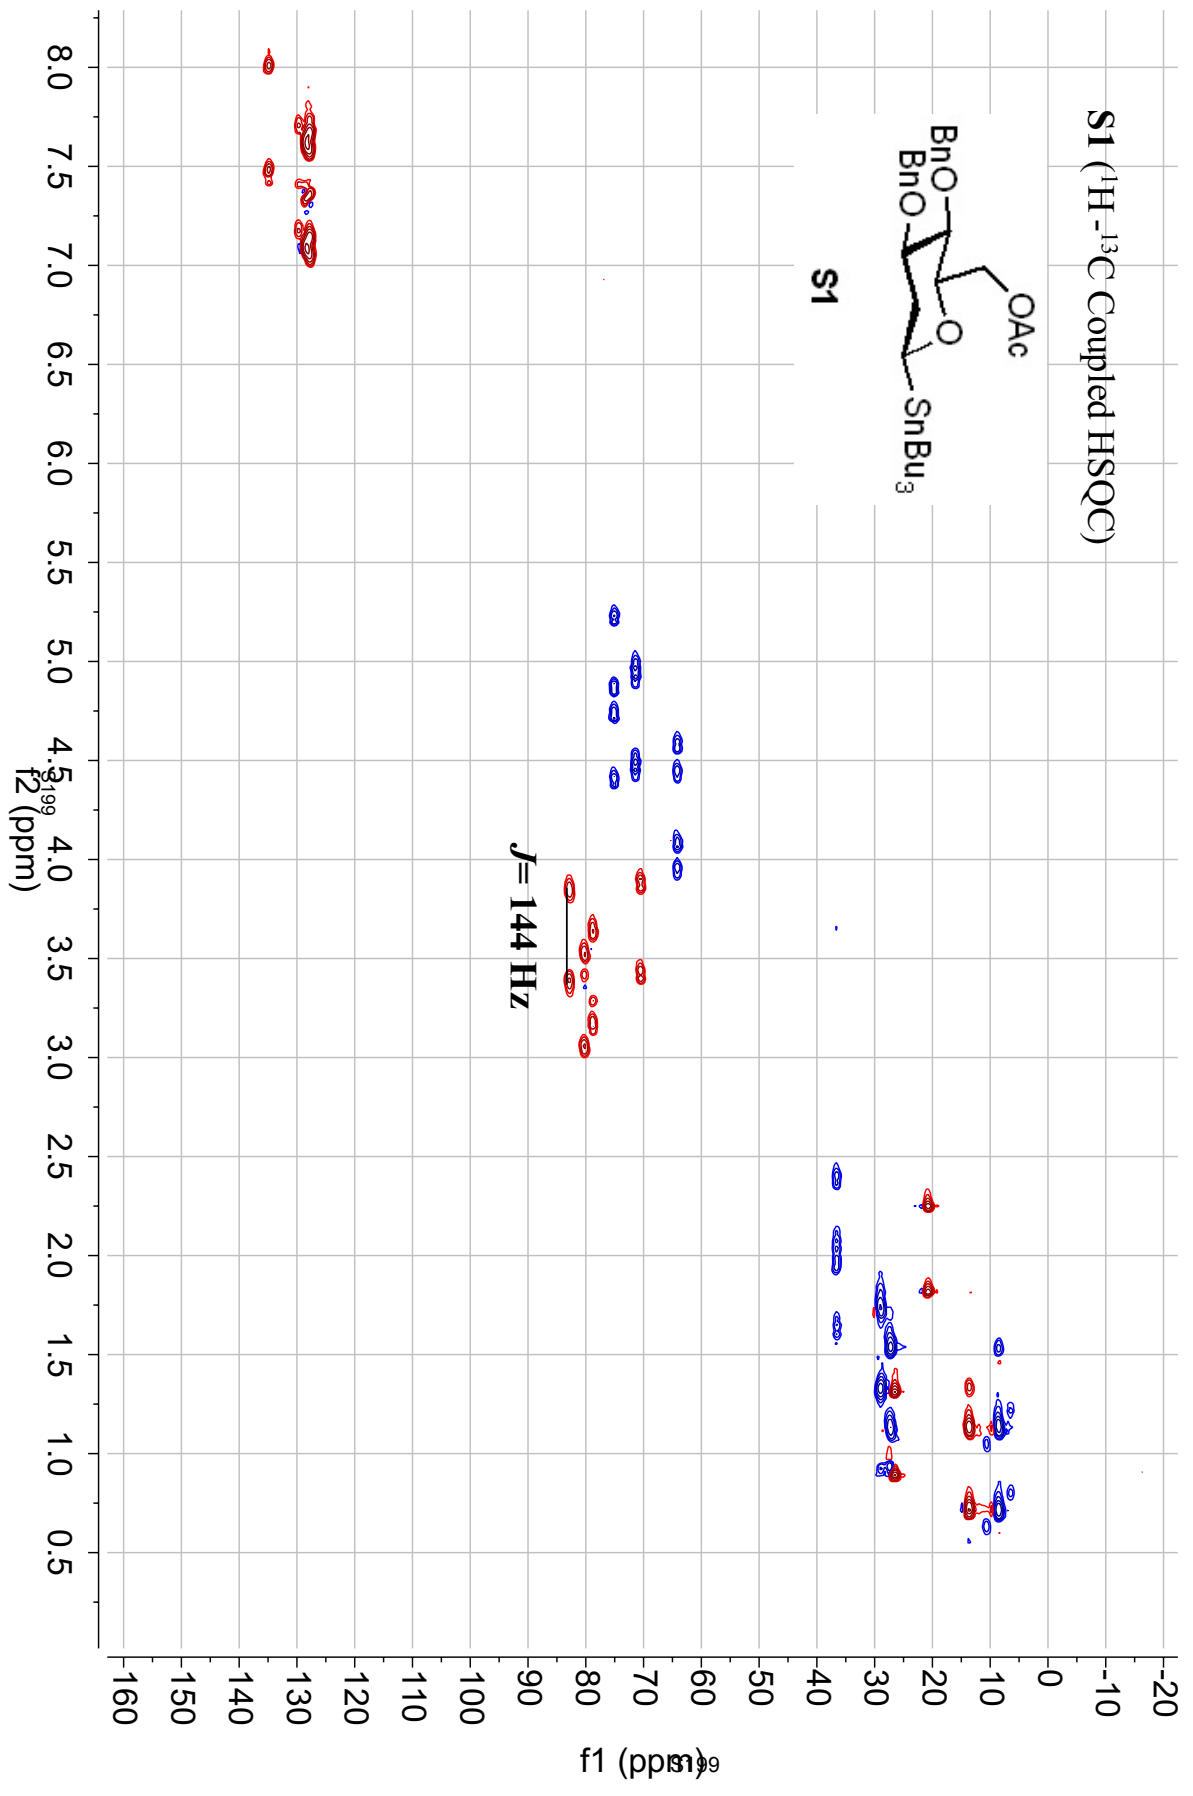

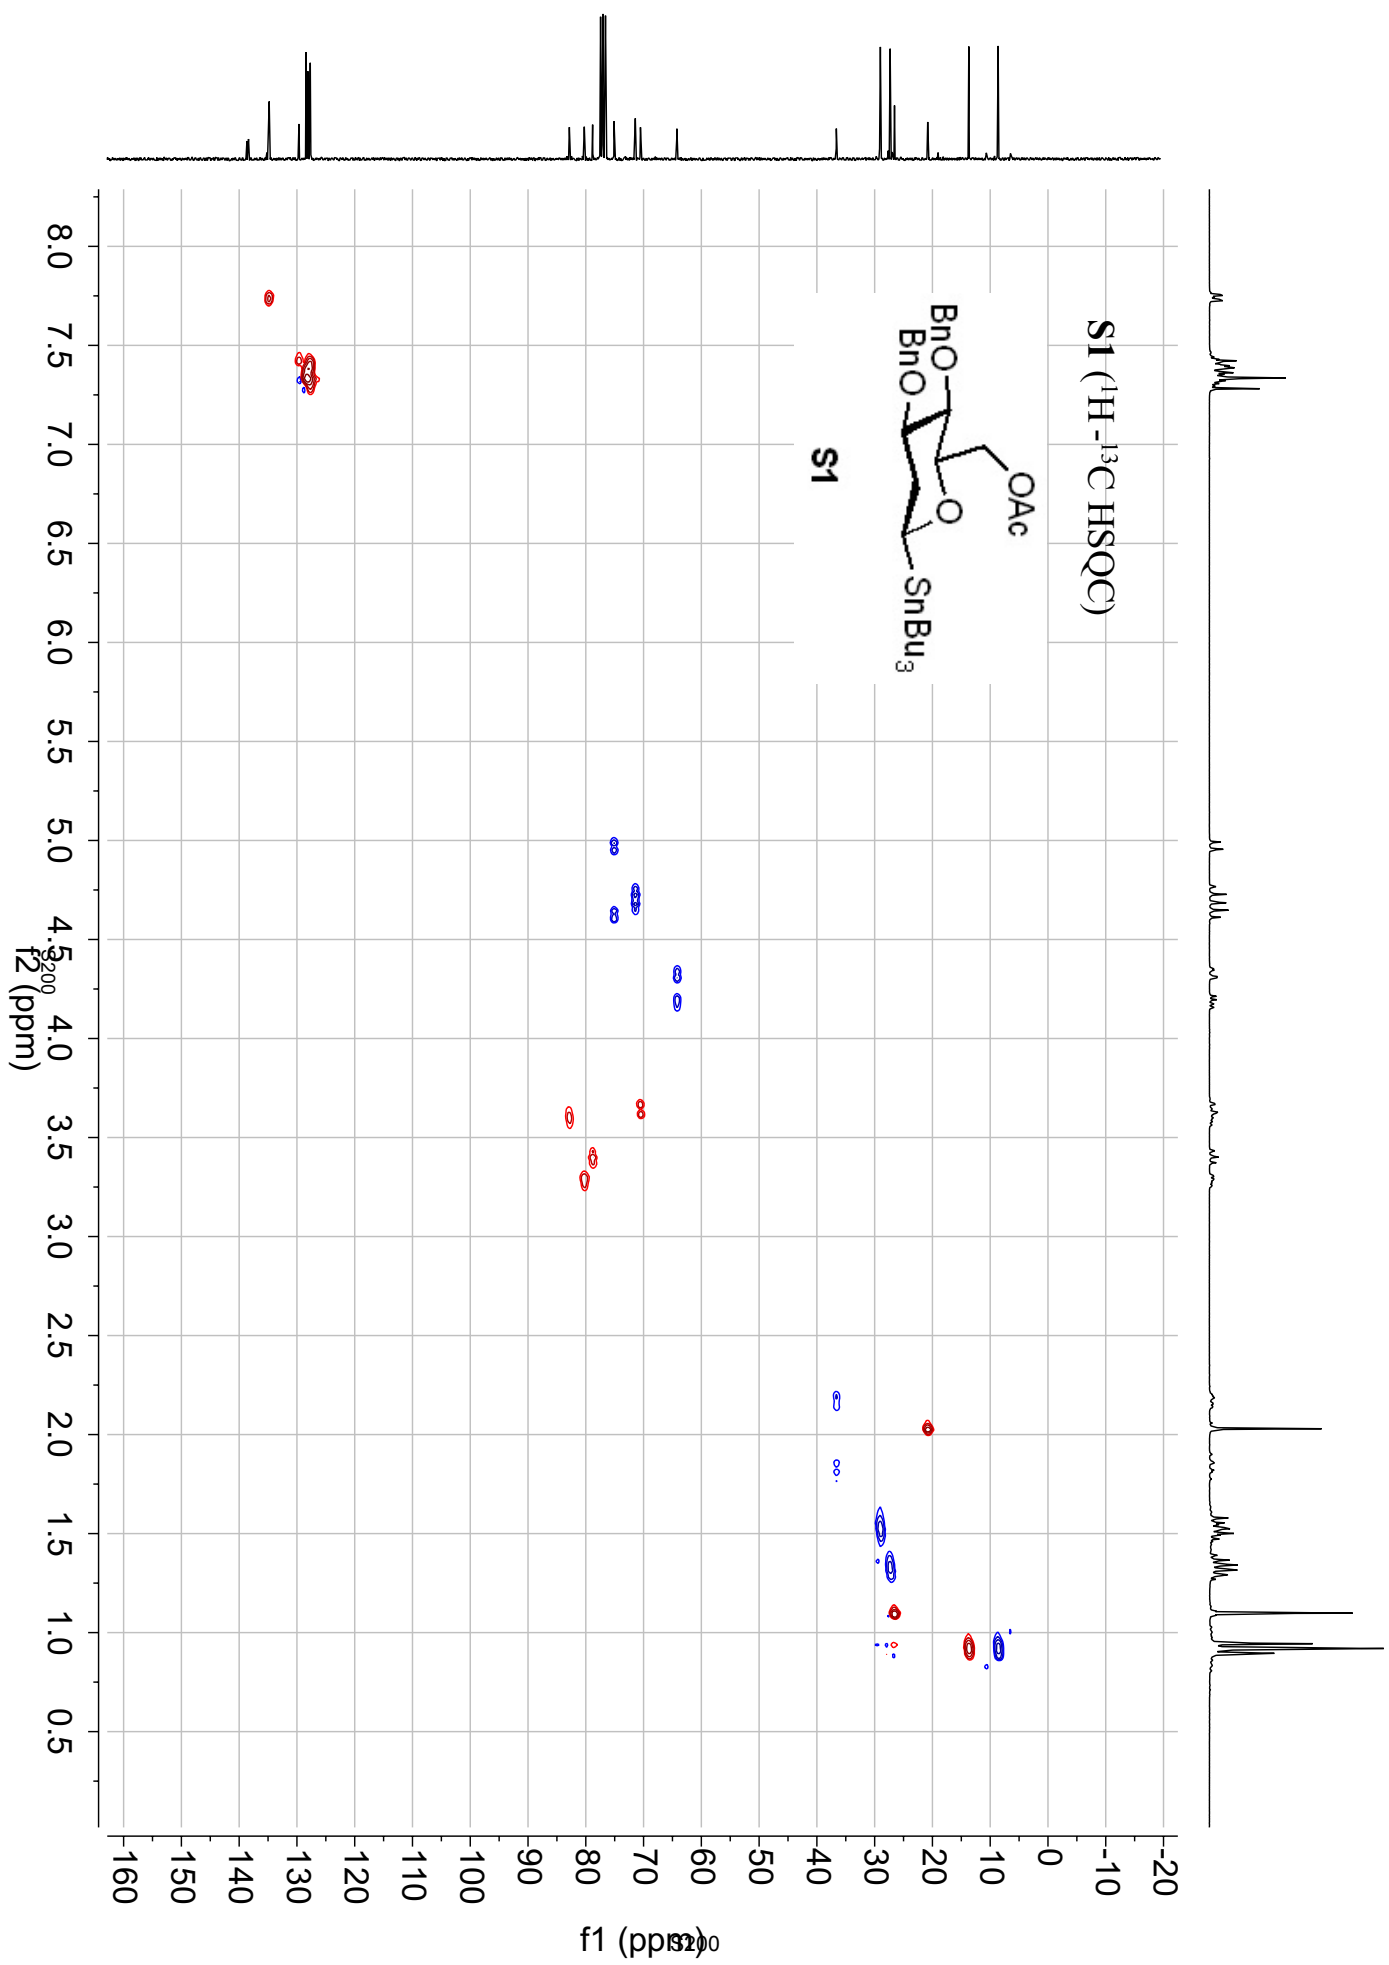



S2 (<sup>1</sup>H NMR, 300MHz, CDCl<sub>3</sub>)

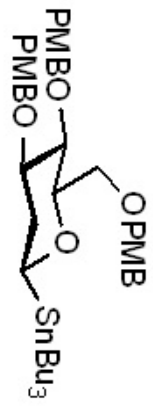

S2

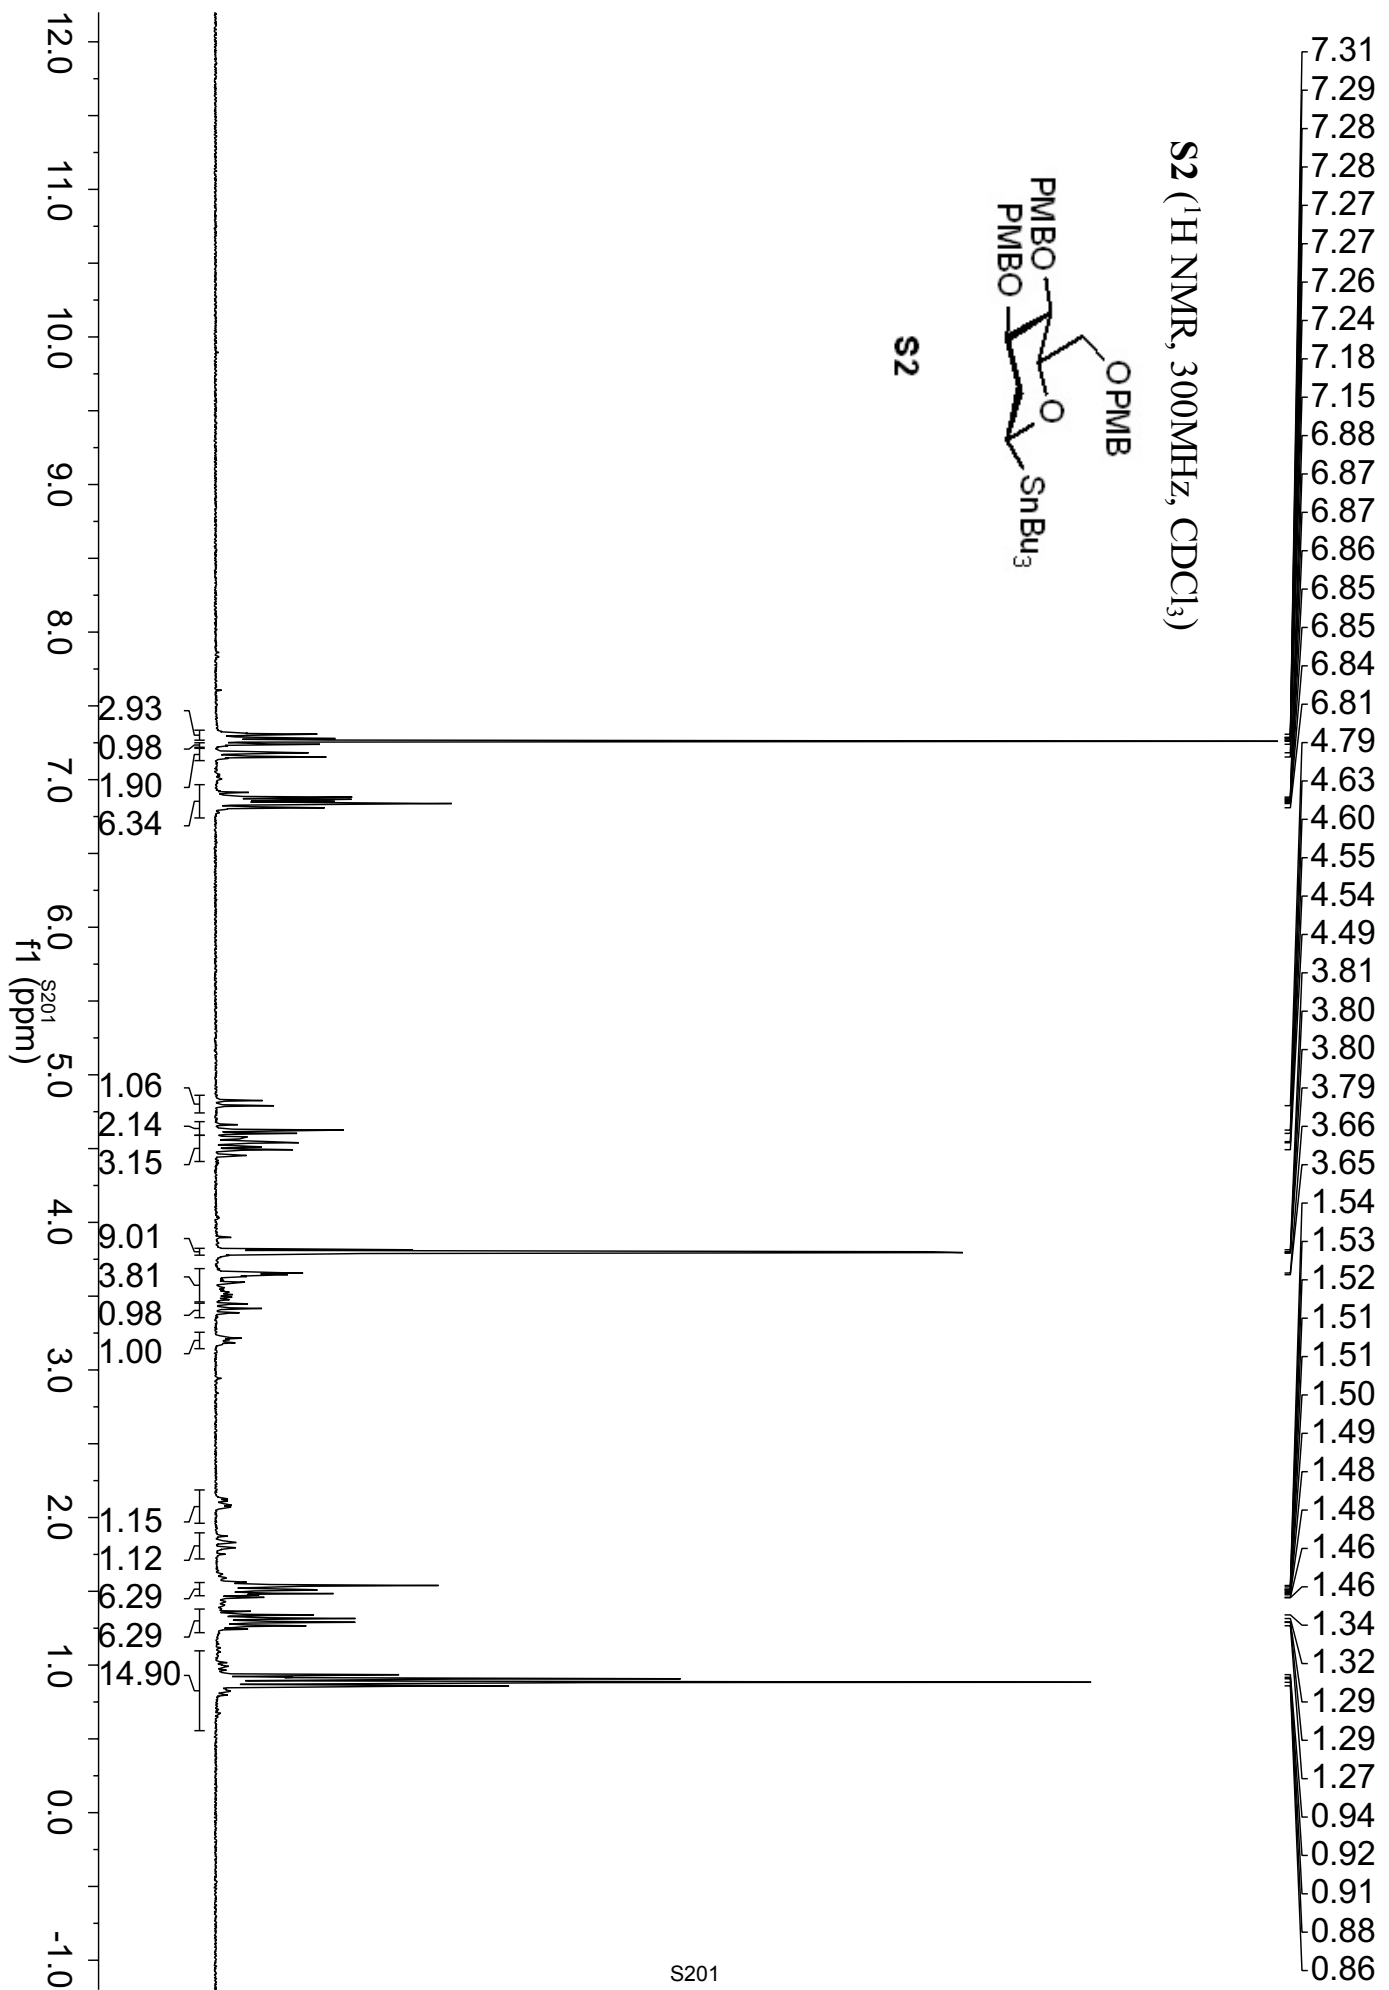

S2 (<sup>13</sup>C NMR, 75MHz, CDCl<sub>3</sub>)

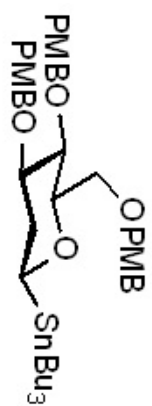

S2

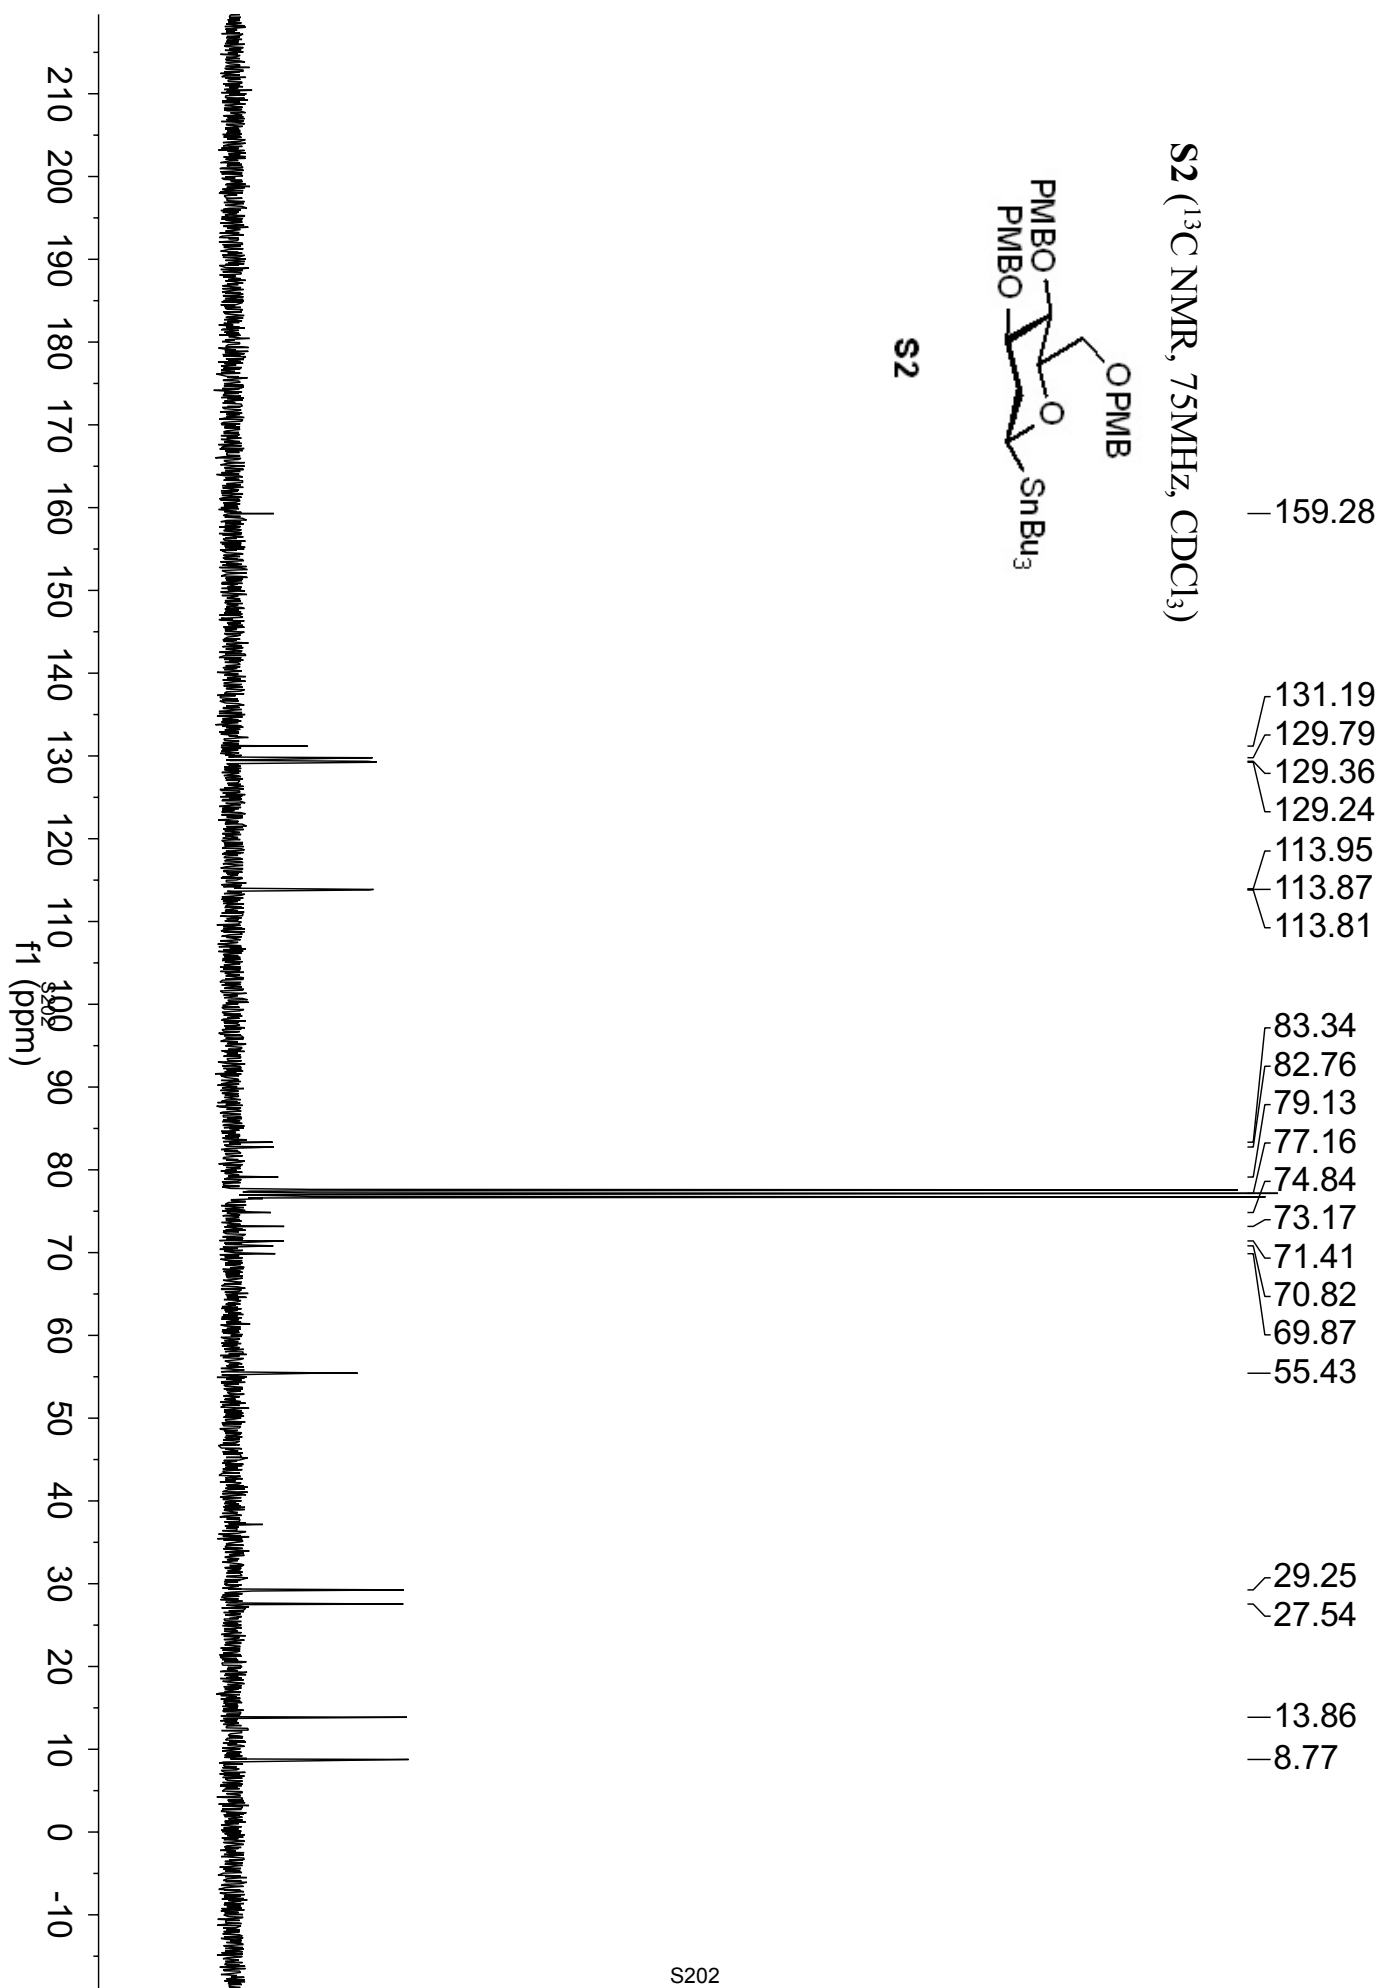



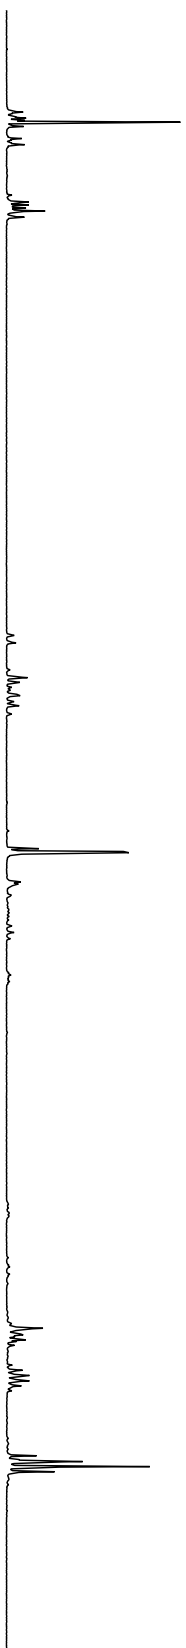

S2 (<sup>1</sup>H-<sup>13</sup>C HSQC)

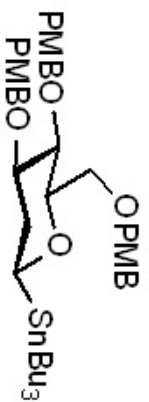

S2

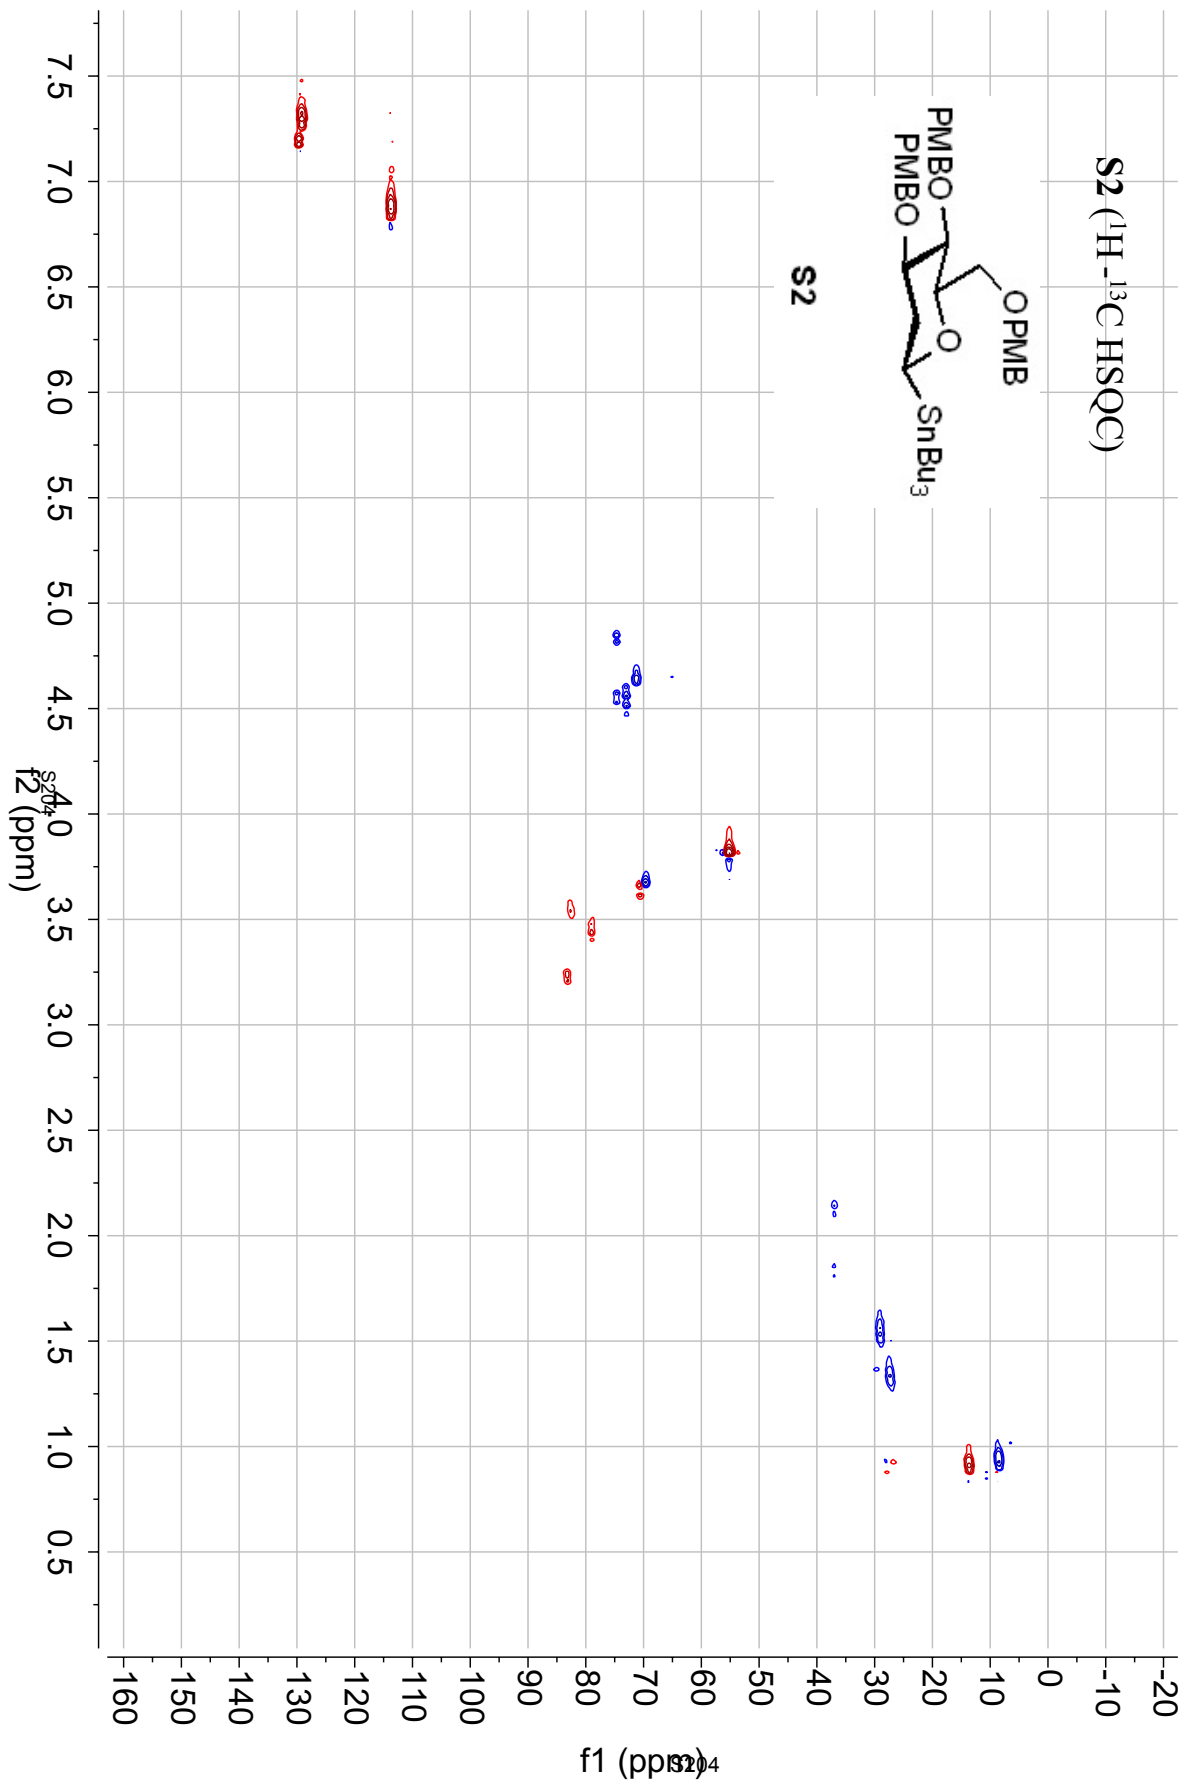

S3 (<sup>1</sup>H NMR, 300MHz, CDCl<sub>3</sub>)

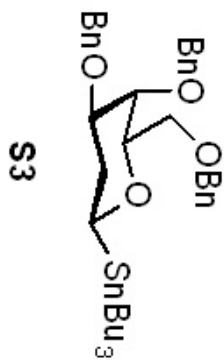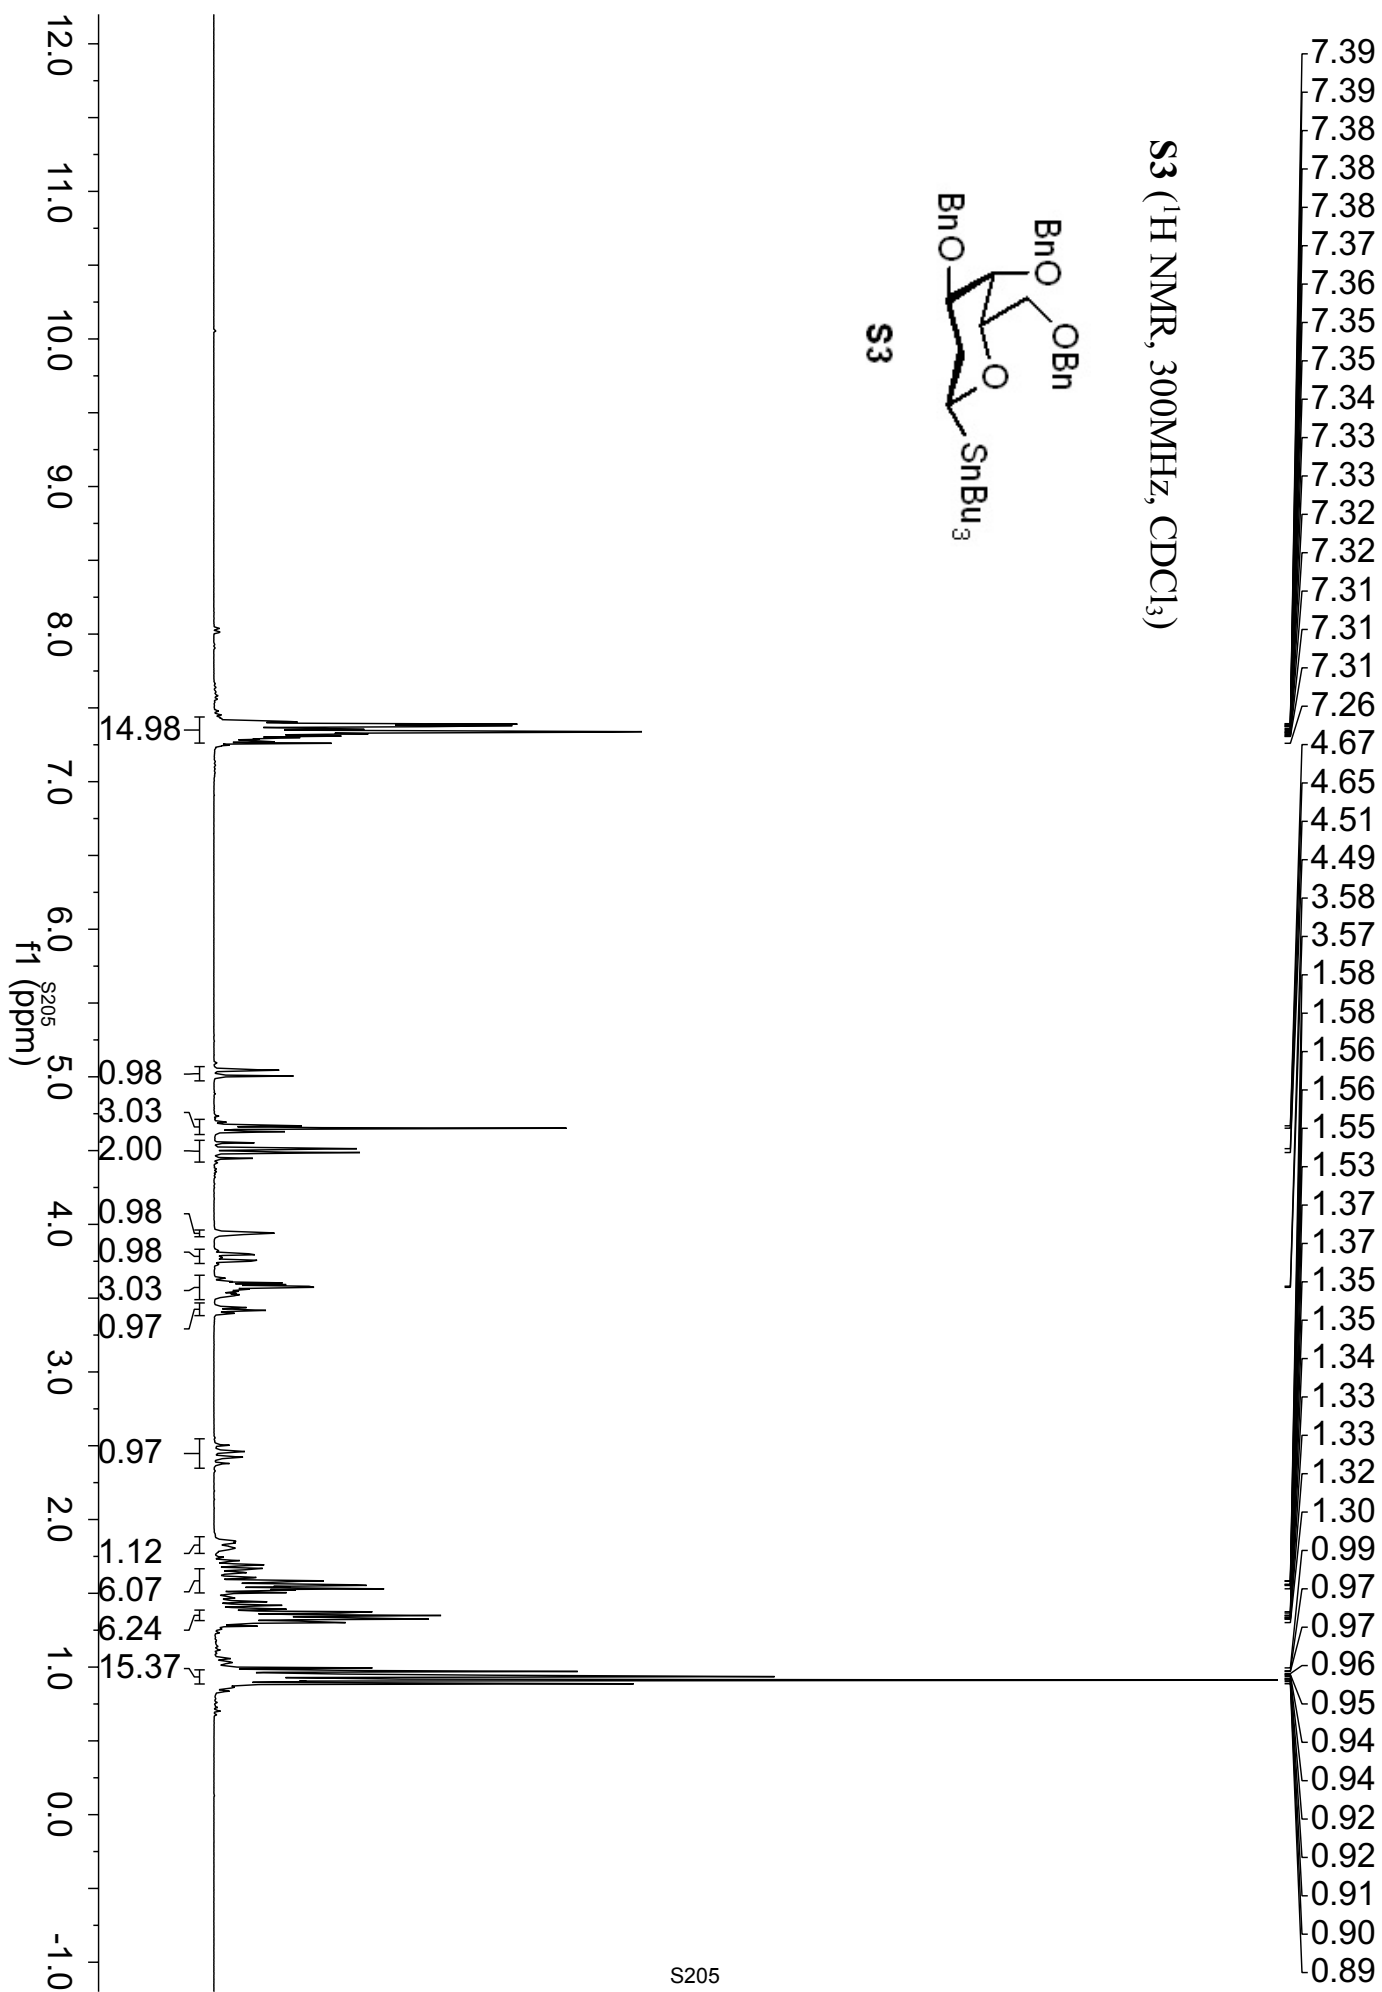

S3 (<sup>13</sup>C NMR, 75MHz, CDCl<sub>3</sub>)

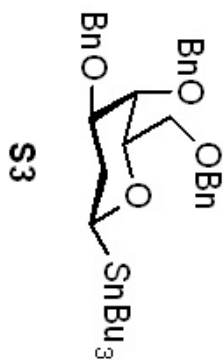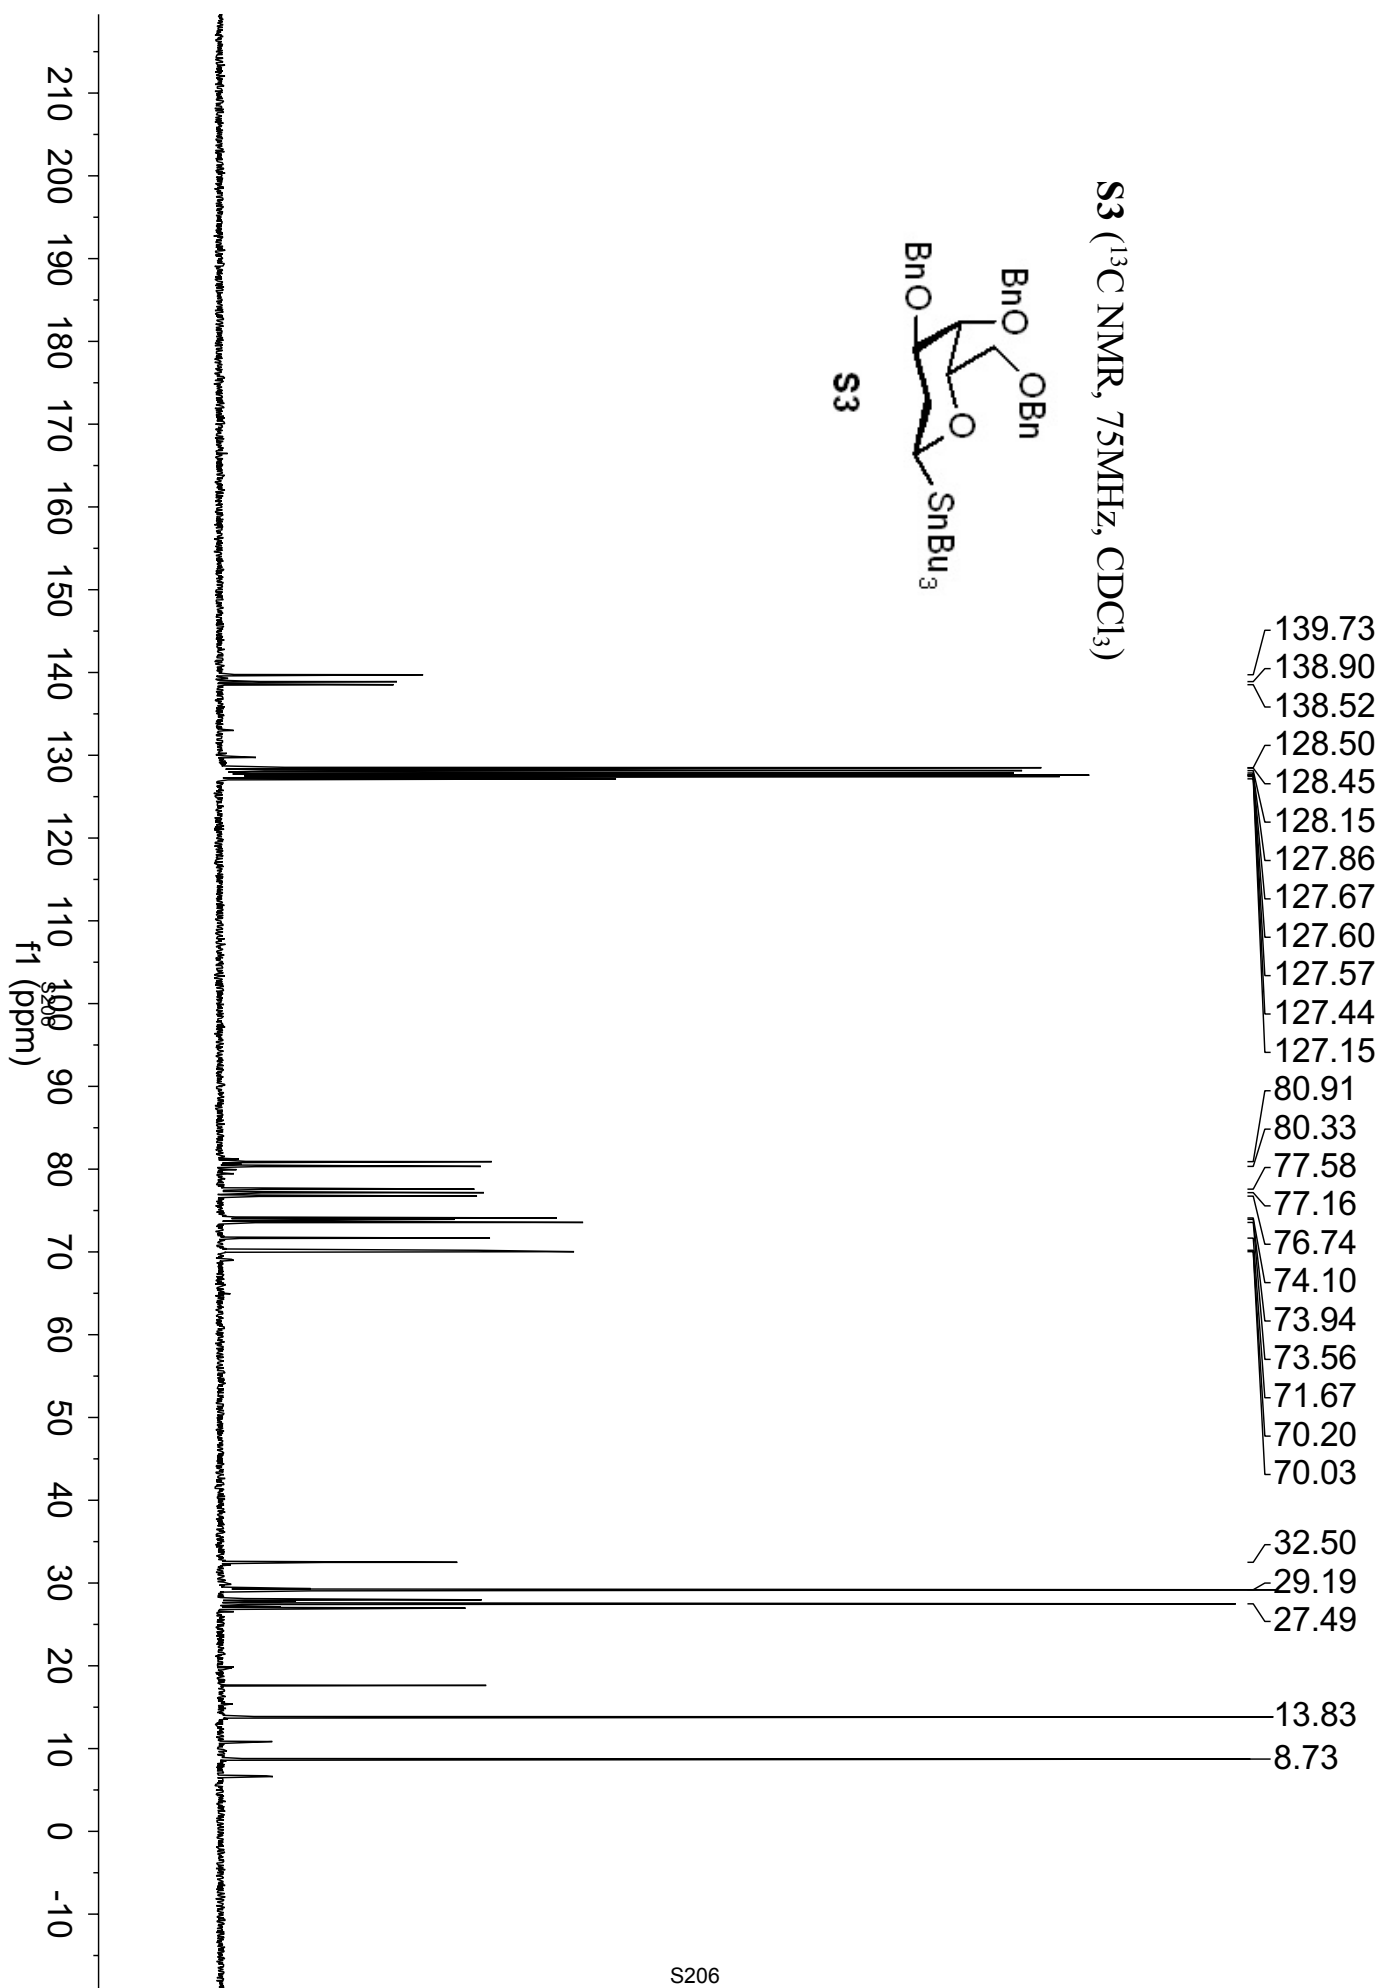

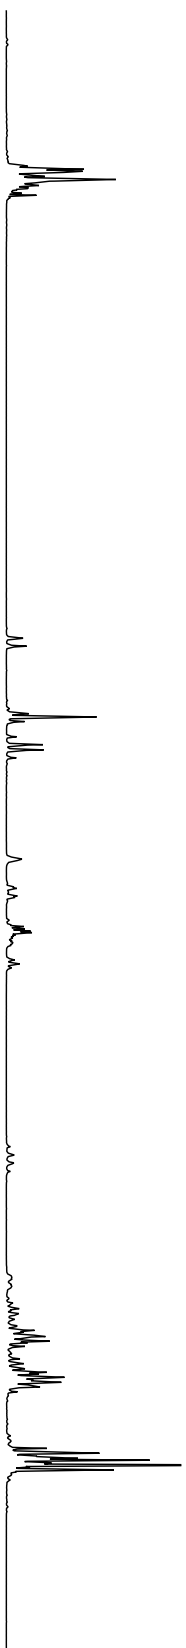

S3 (<sup>1</sup>H-<sup>13</sup>C Coupled HSQC)

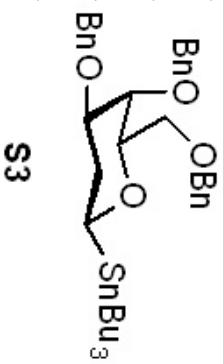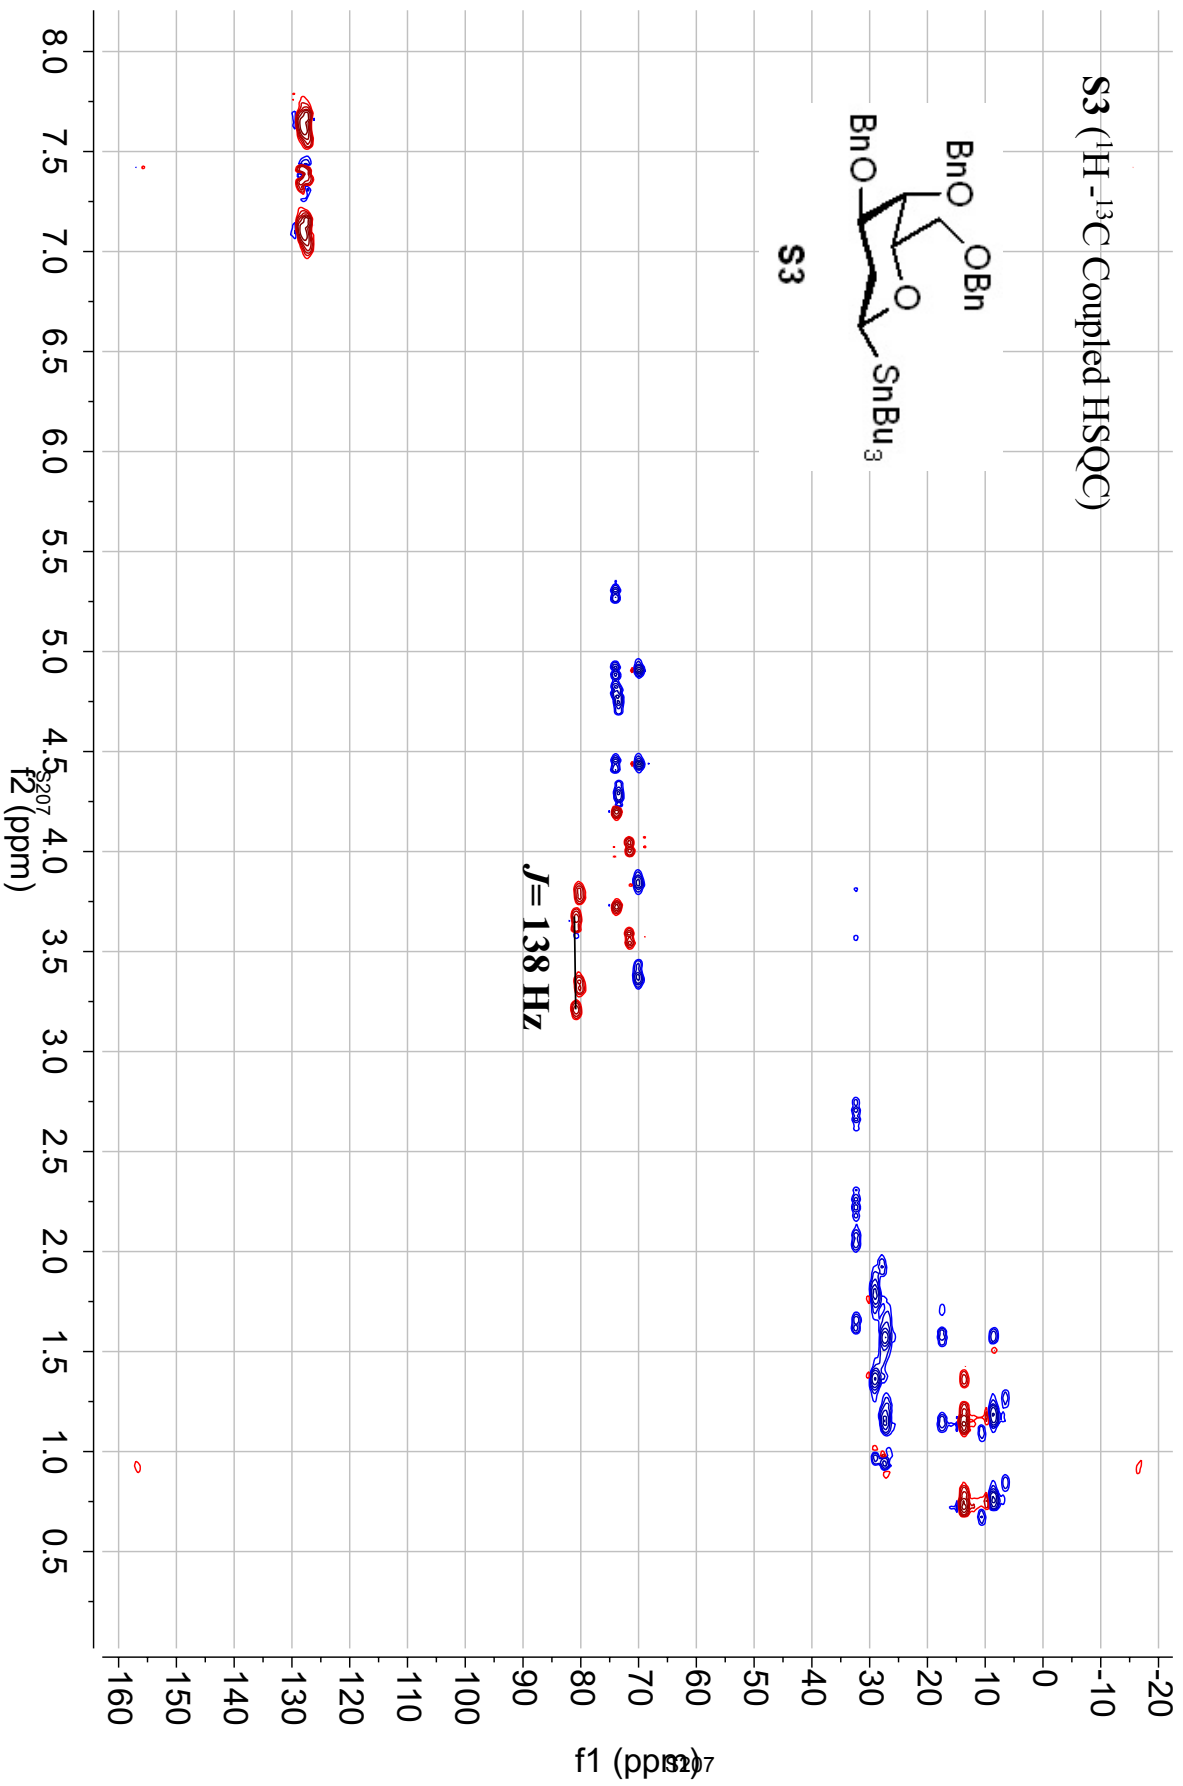





S4 (<sup>1</sup>H NMR, 300MHz, CDCl<sub>3</sub>)

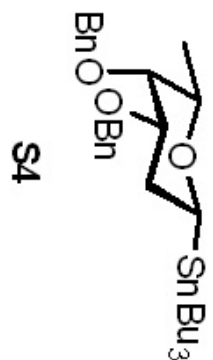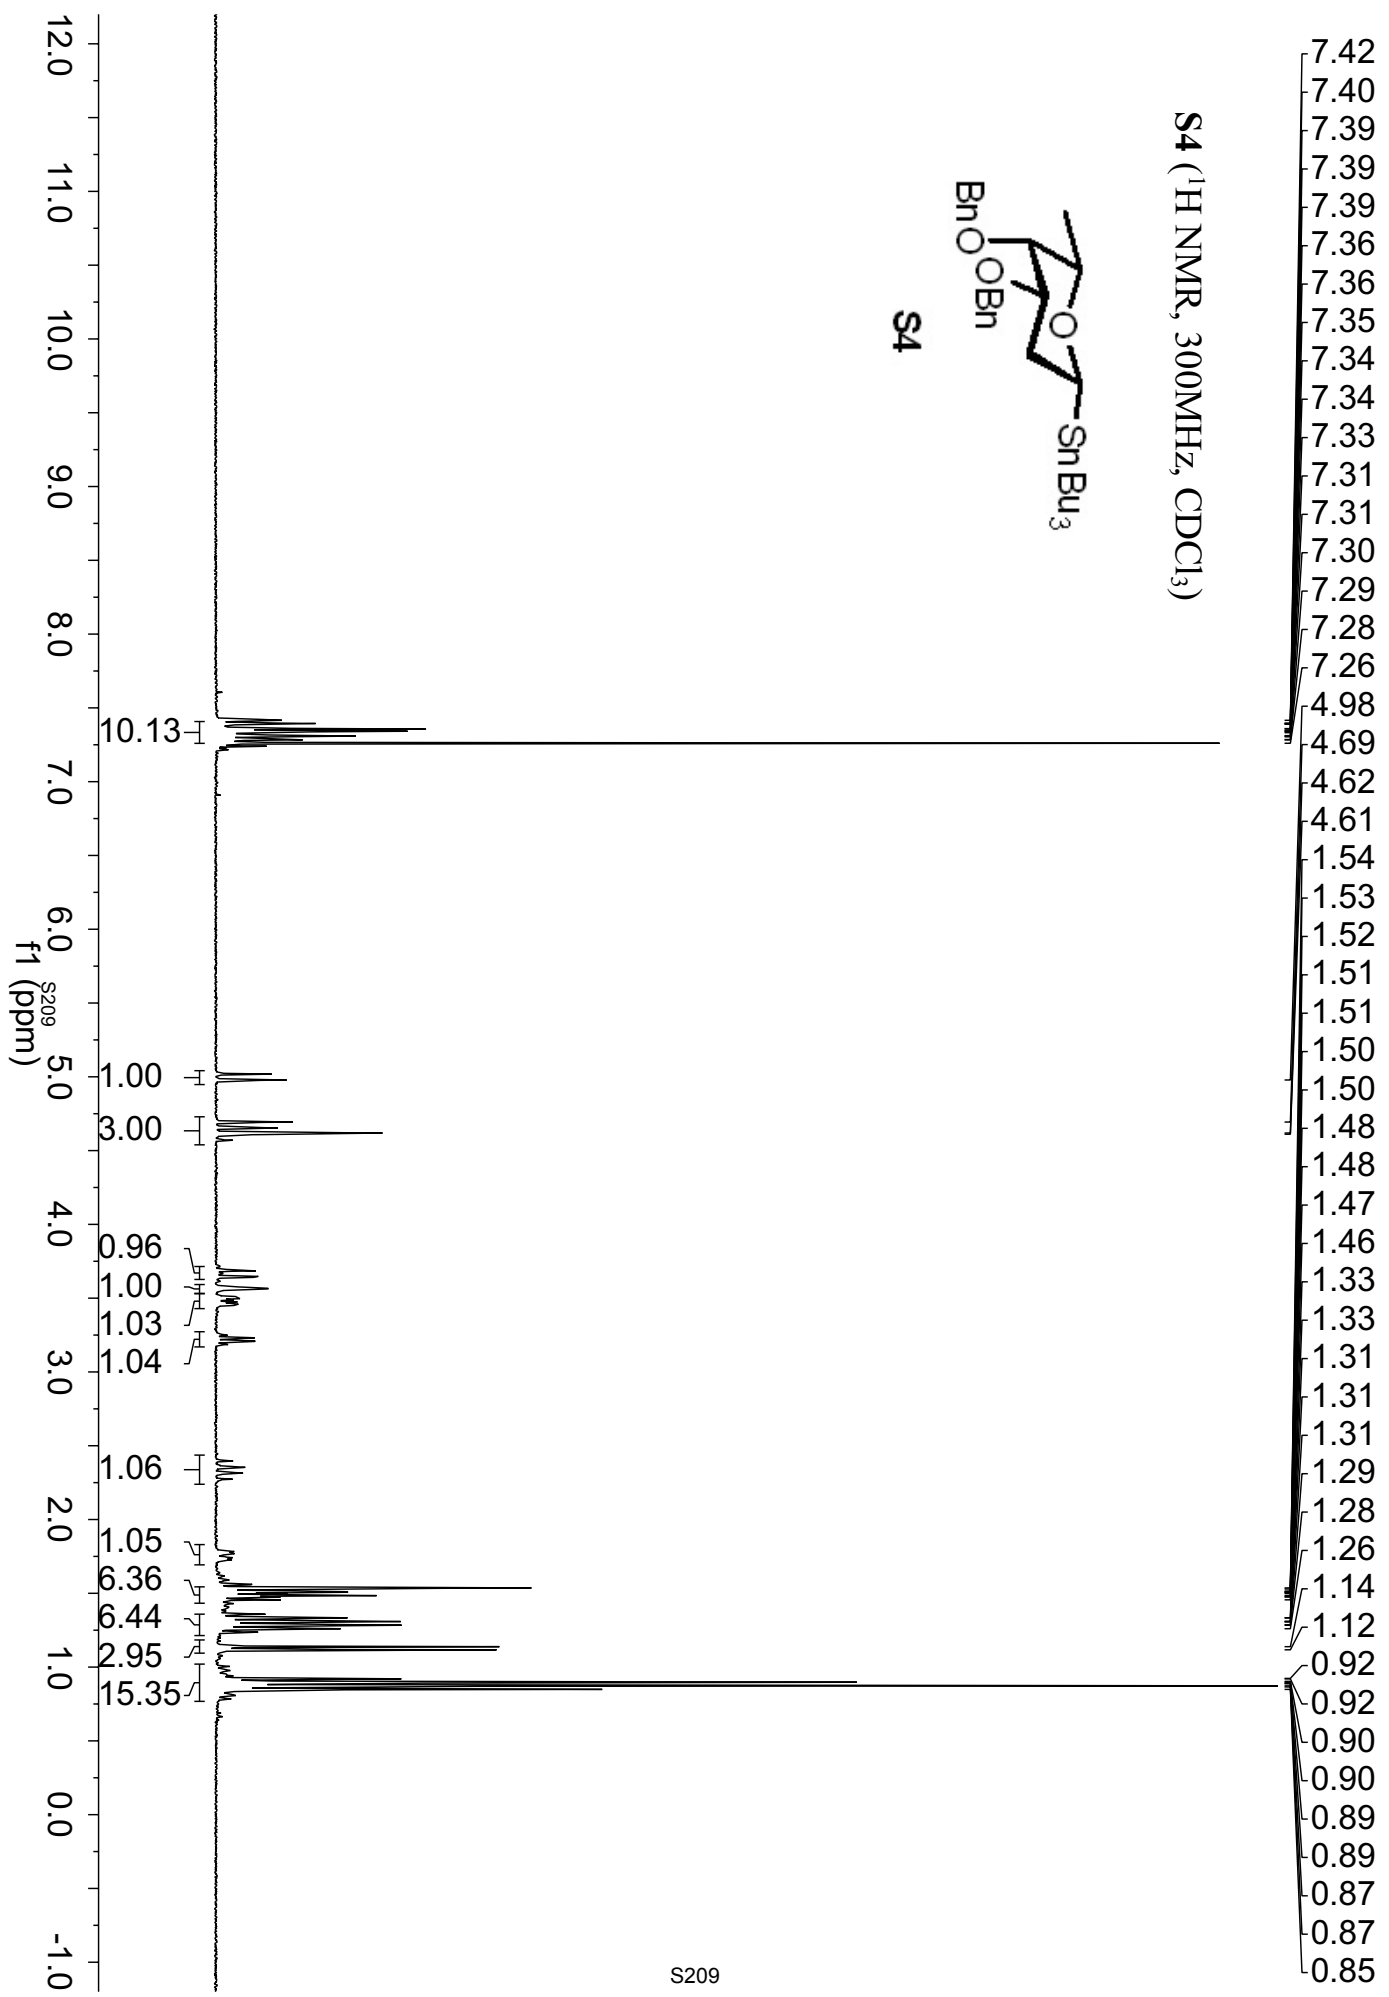

S4 (<sup>13</sup>C NMR, 75MHz, CDCl<sub>3</sub>)

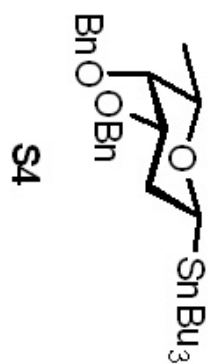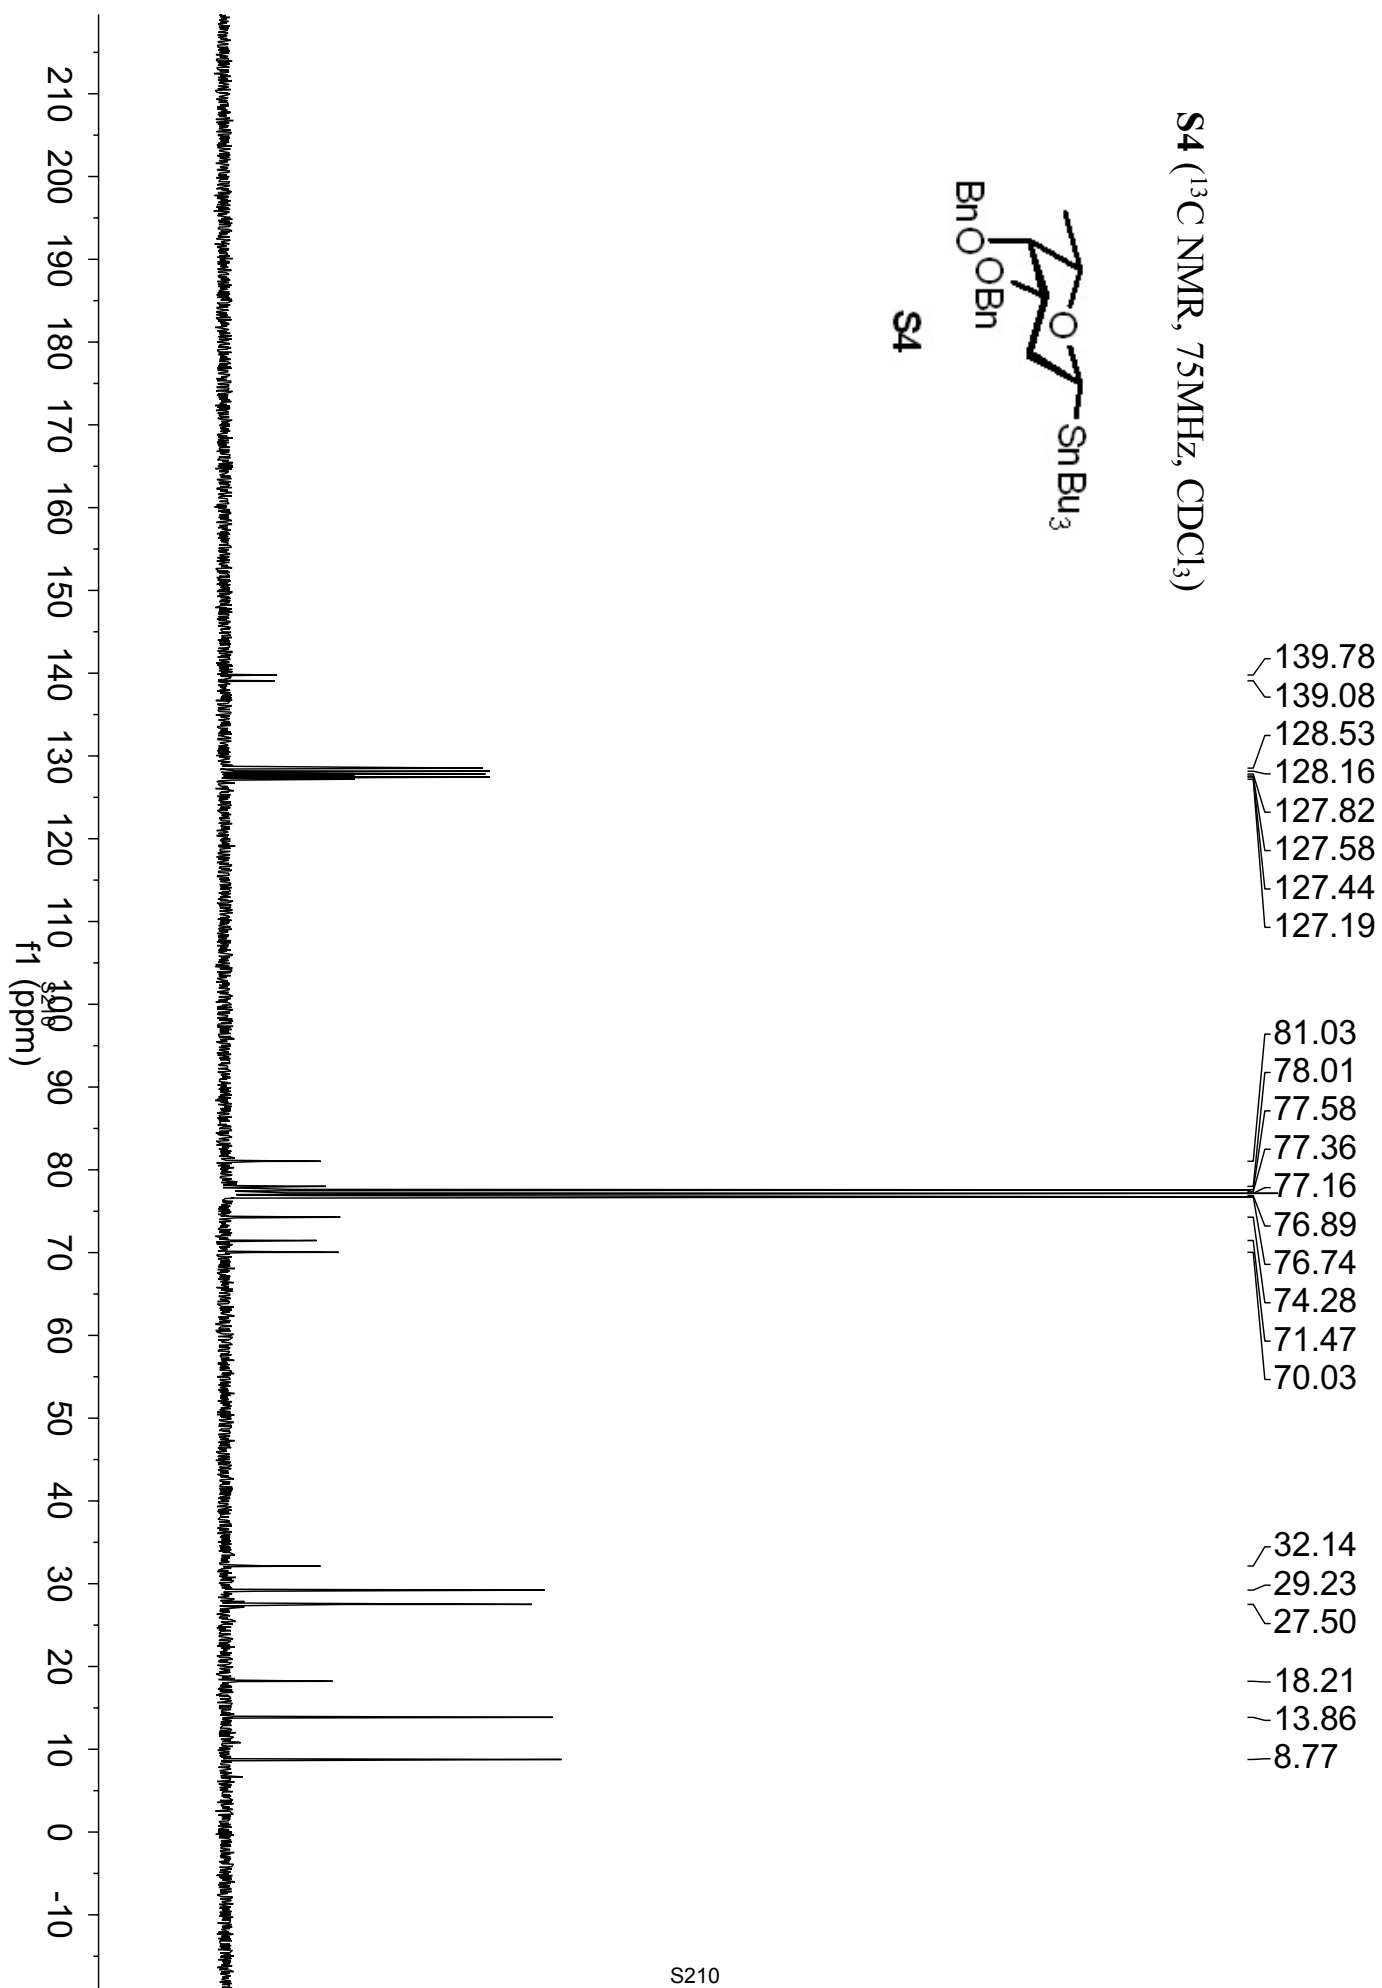

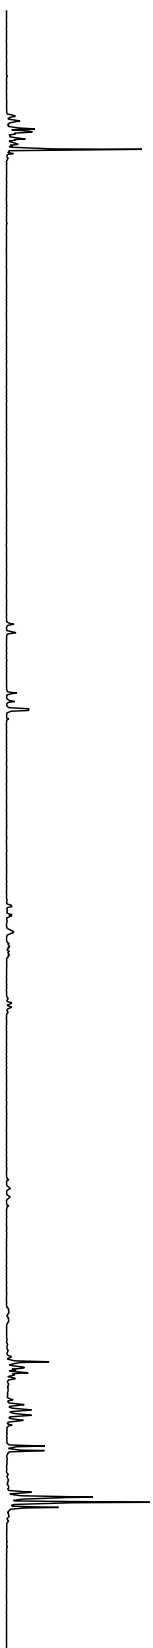

S4 (<sup>1</sup>H-<sup>13</sup>C Coupled HSQC)

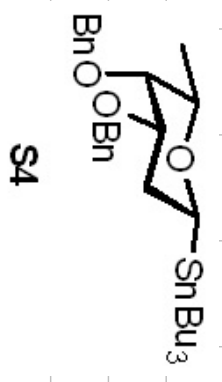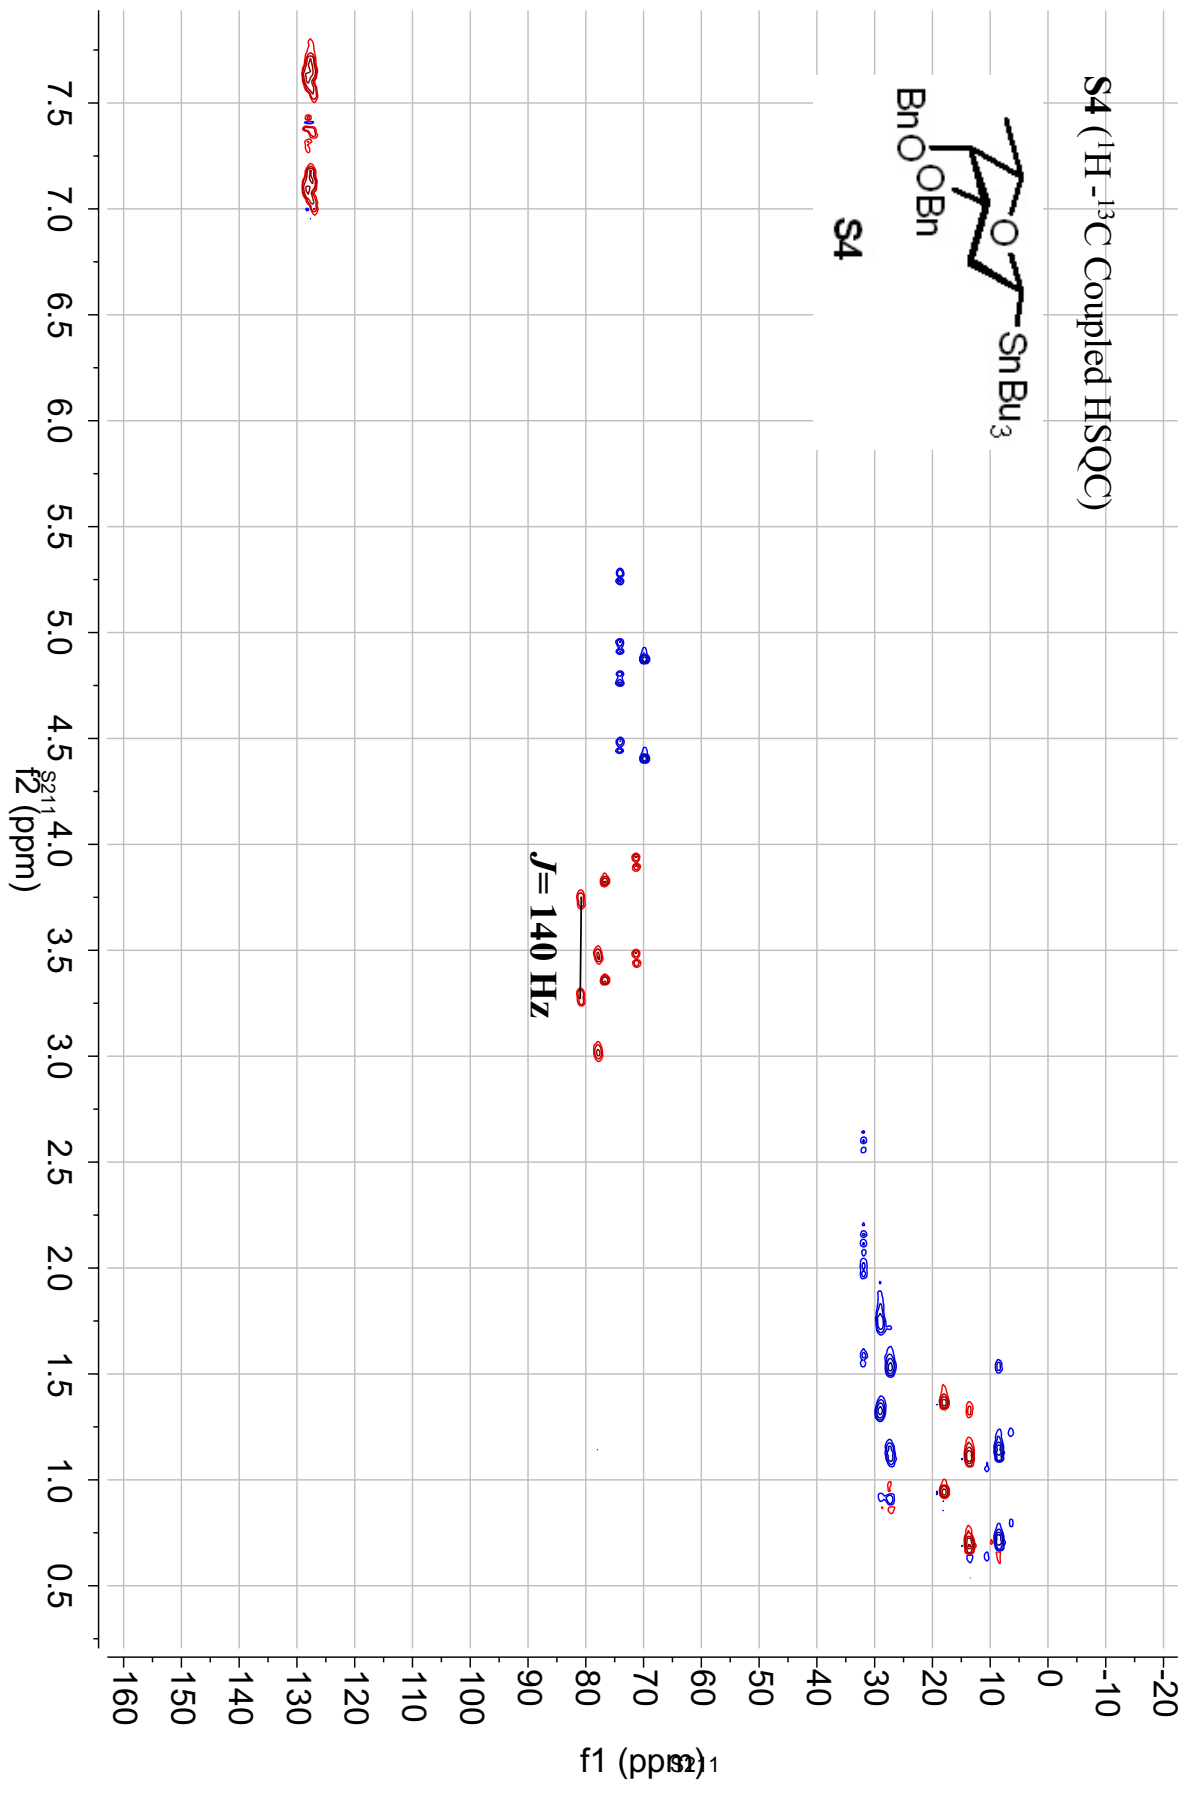



**S5** ( $^1\text{H}$  NMR, 300MHz,  $\text{CDCl}_3$ )

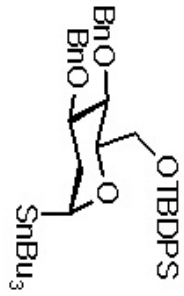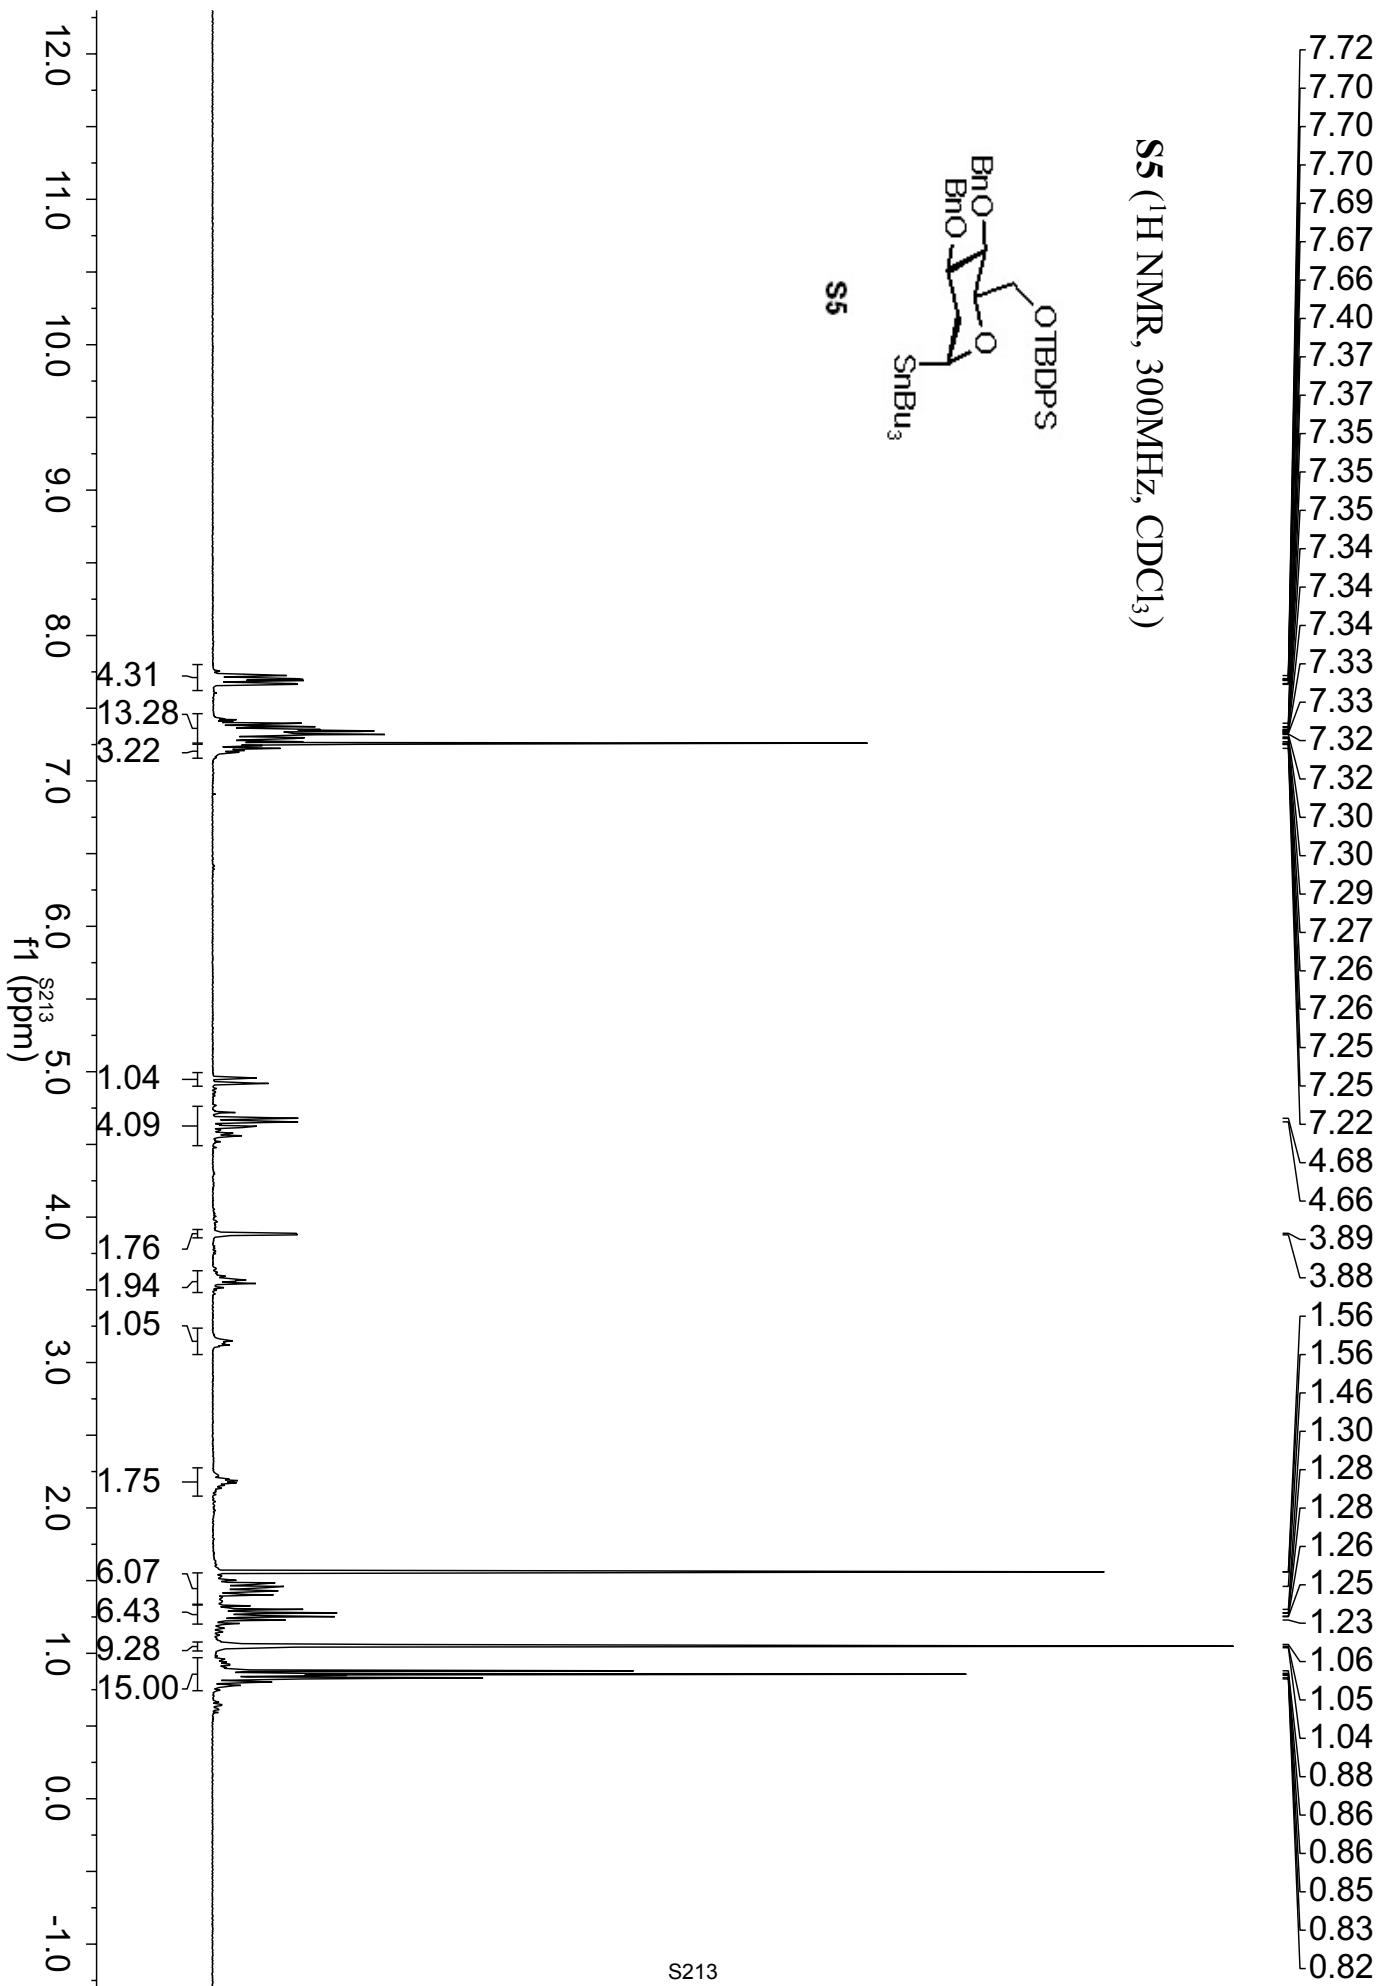

S5 (<sup>13</sup>C NMR, 75MHz, CDCl<sub>3</sub>)

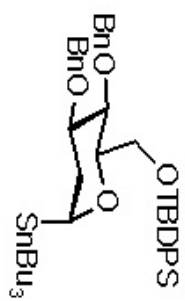

S5

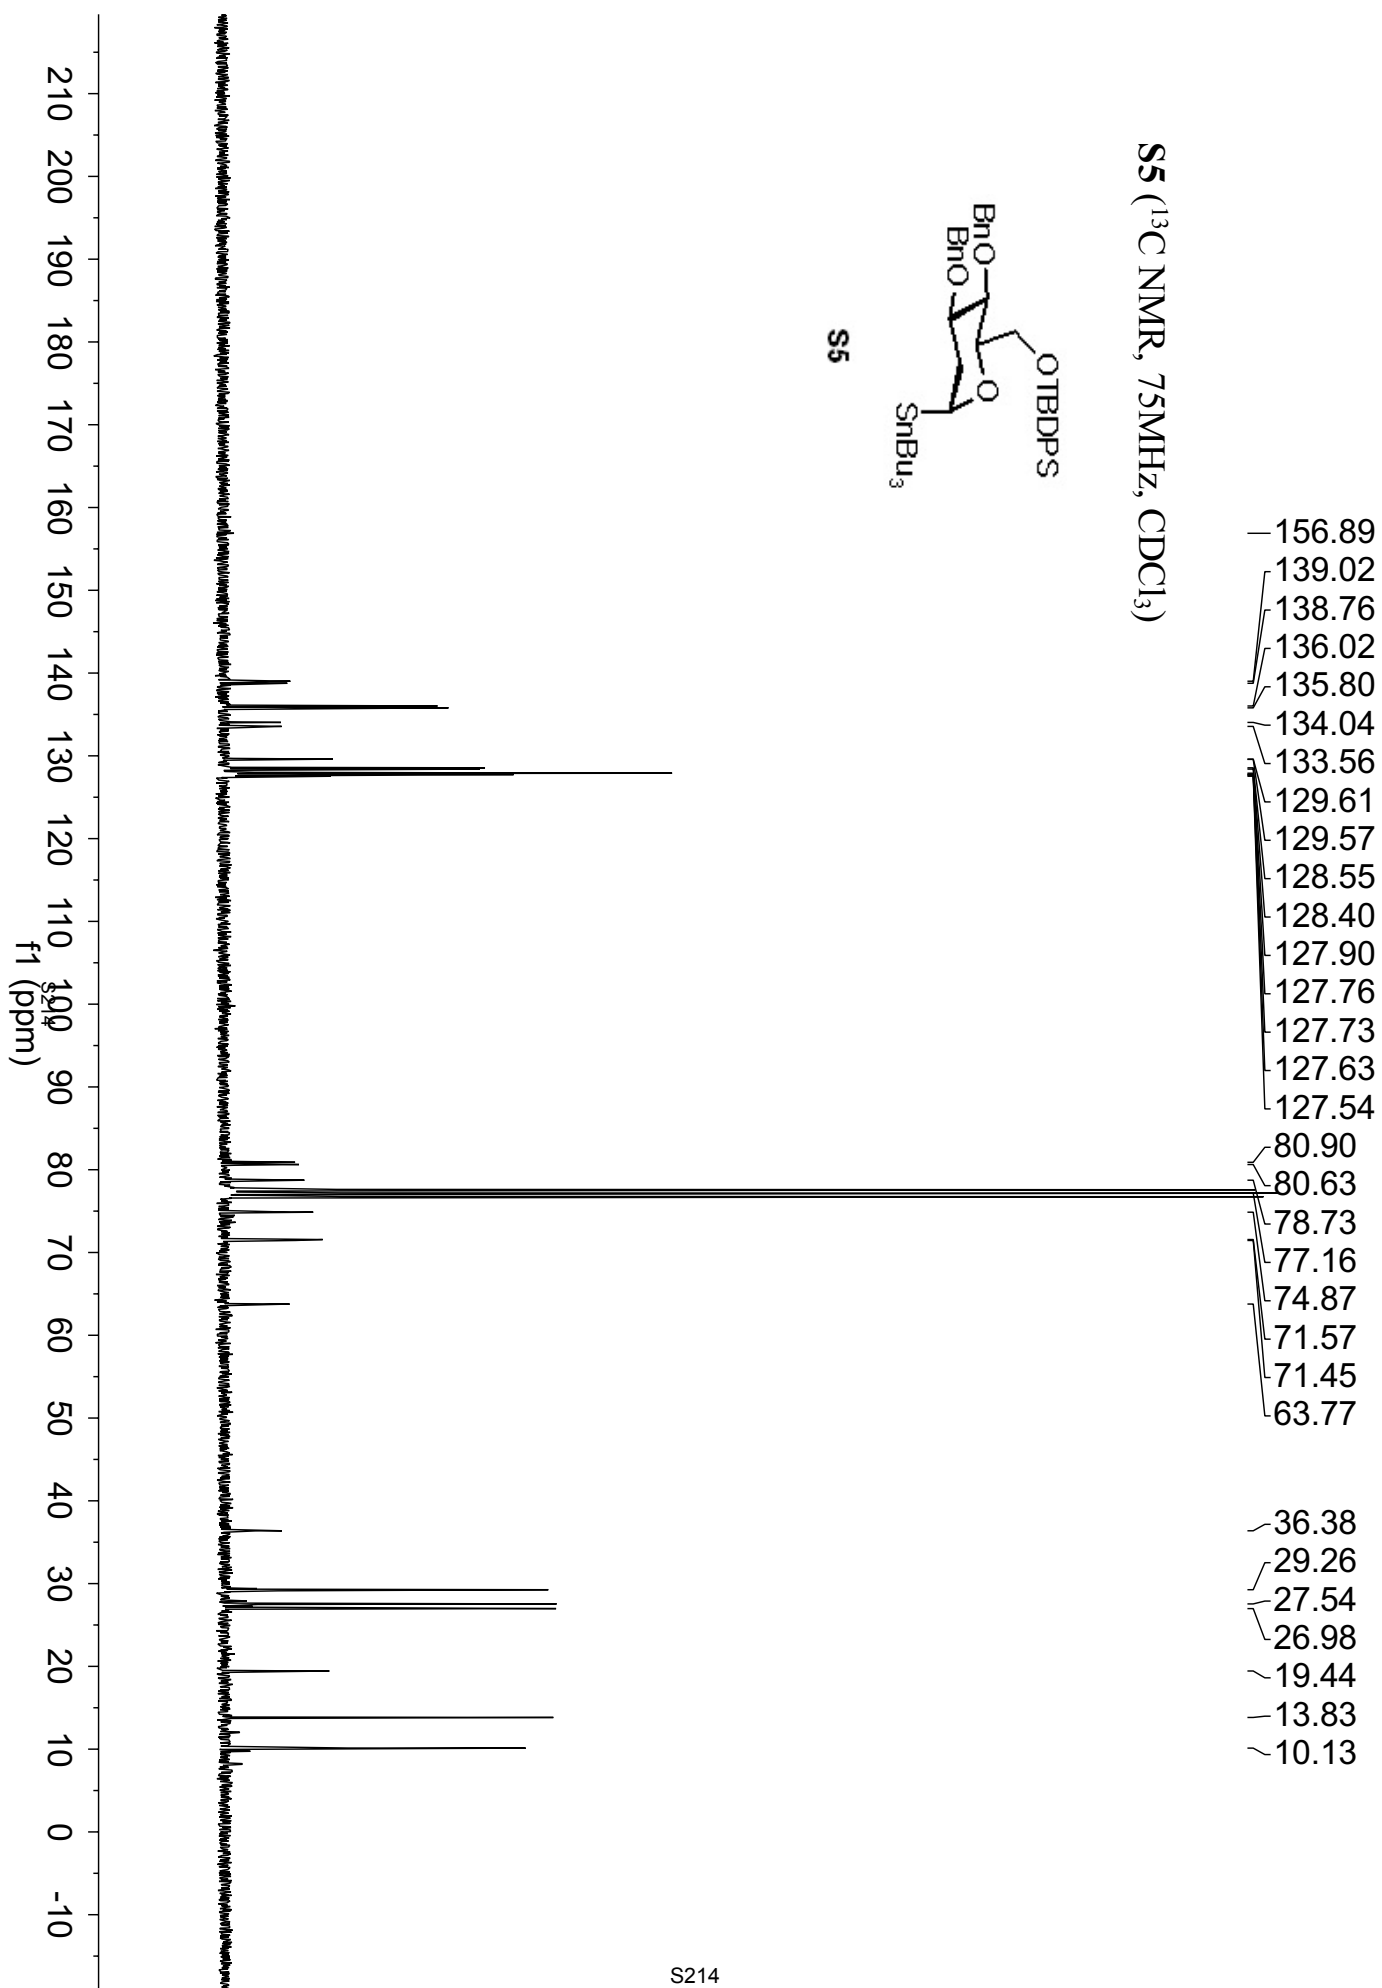

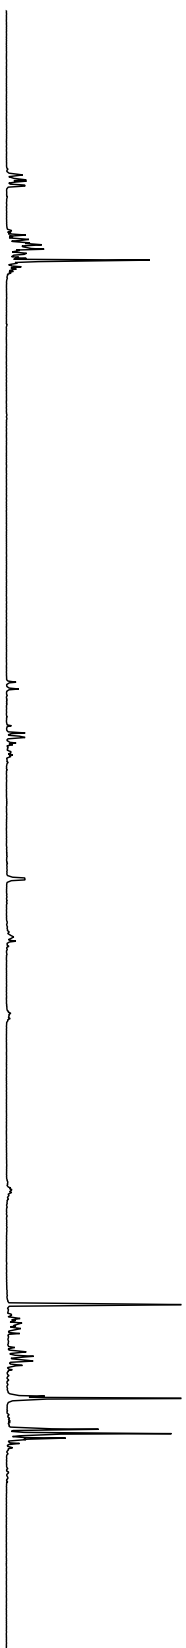

S5 (<sup>1</sup>H-<sup>13</sup>C Coupled HSQC)

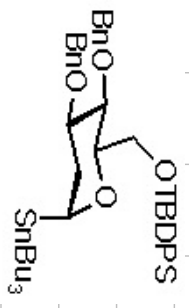

S5

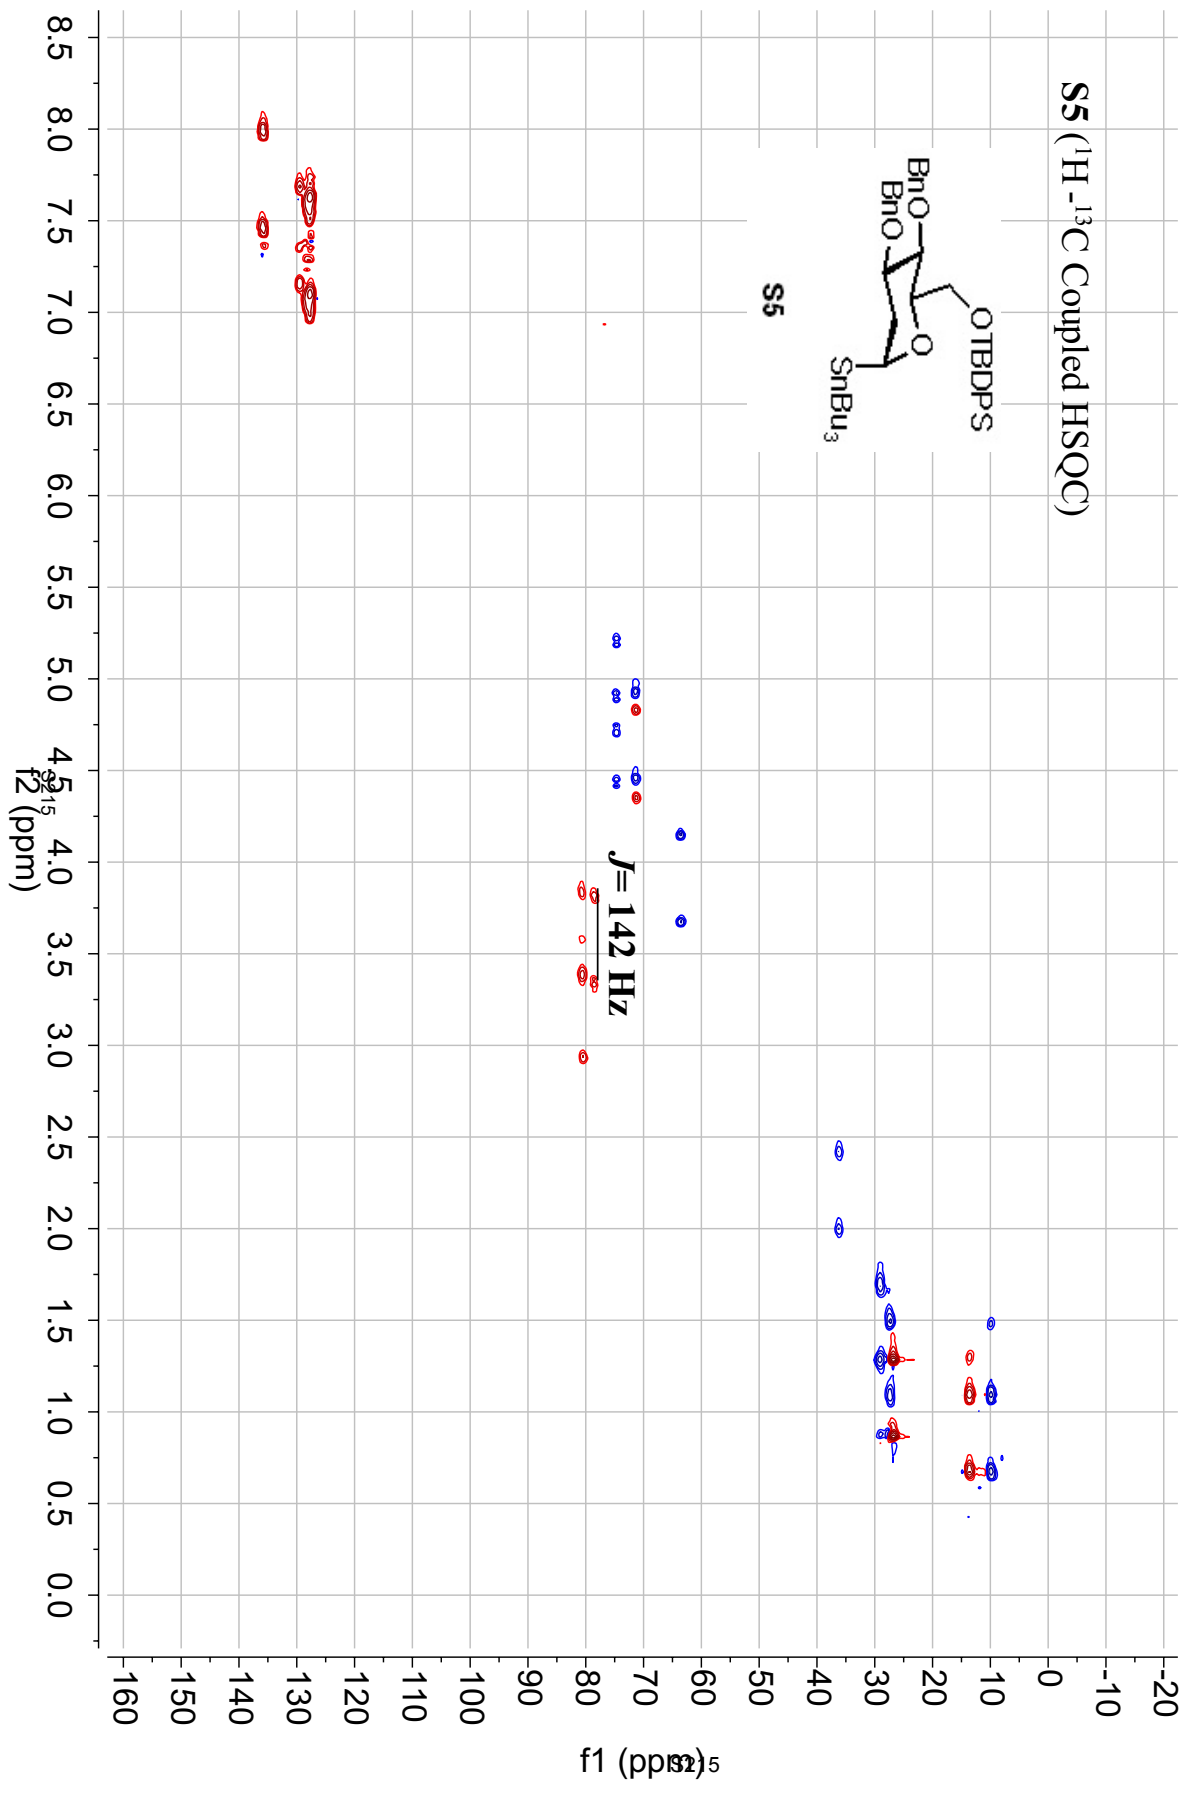

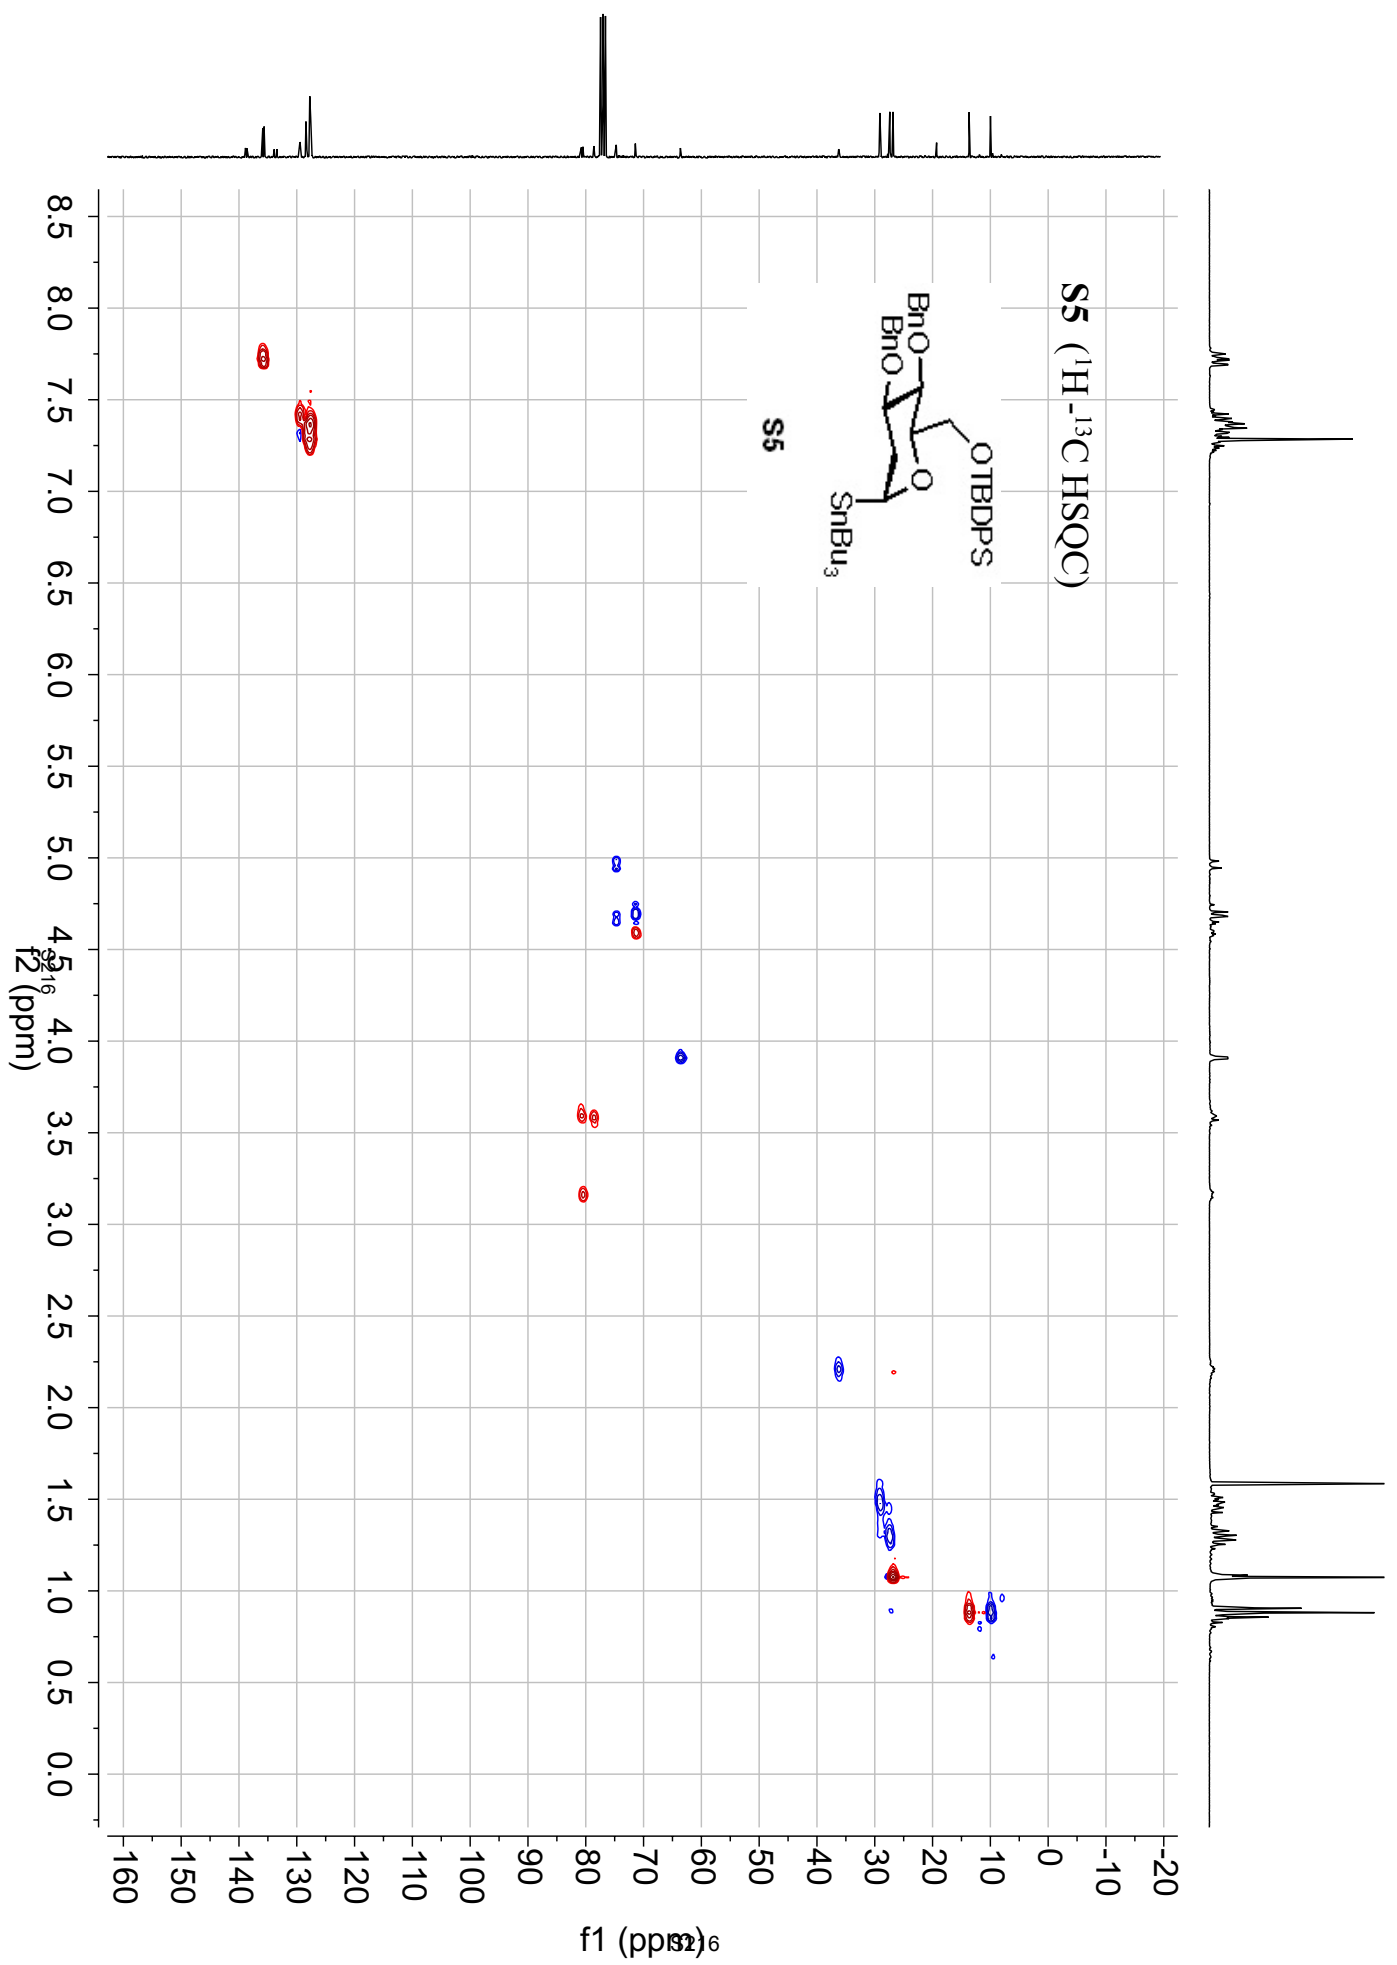



S6 (<sup>1</sup>H NMR, 300MHz, CDCl<sub>3</sub>)

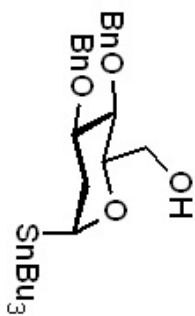

S6

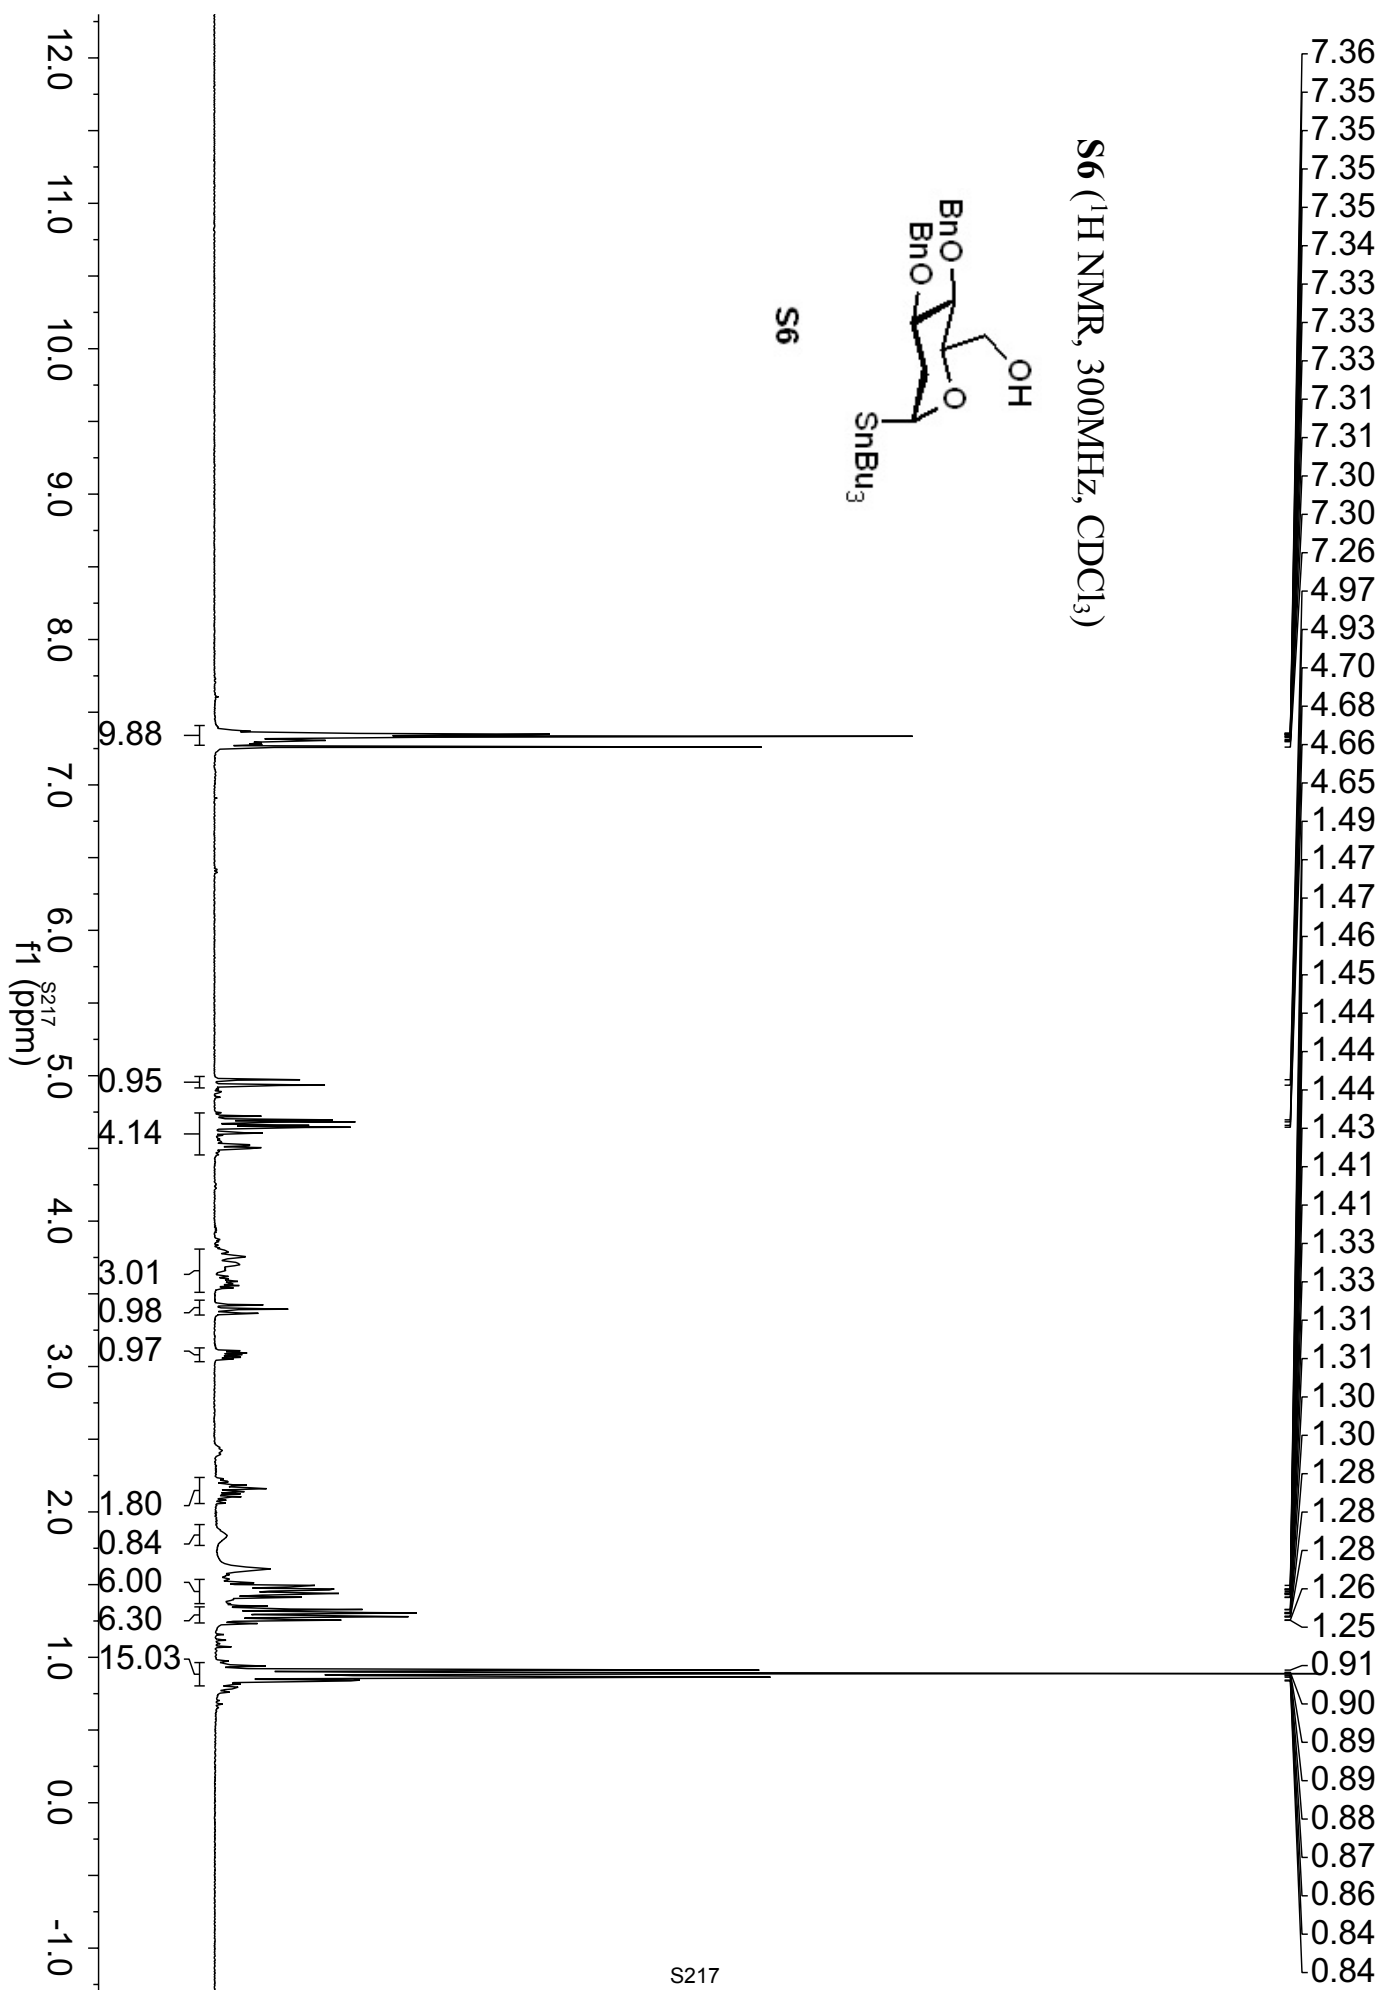

S6 (<sup>13</sup>C NMR, 75MHz, CDCl<sub>3</sub>)

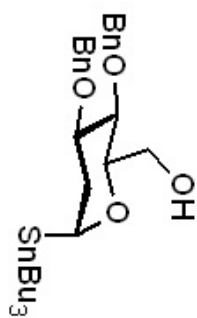

S6

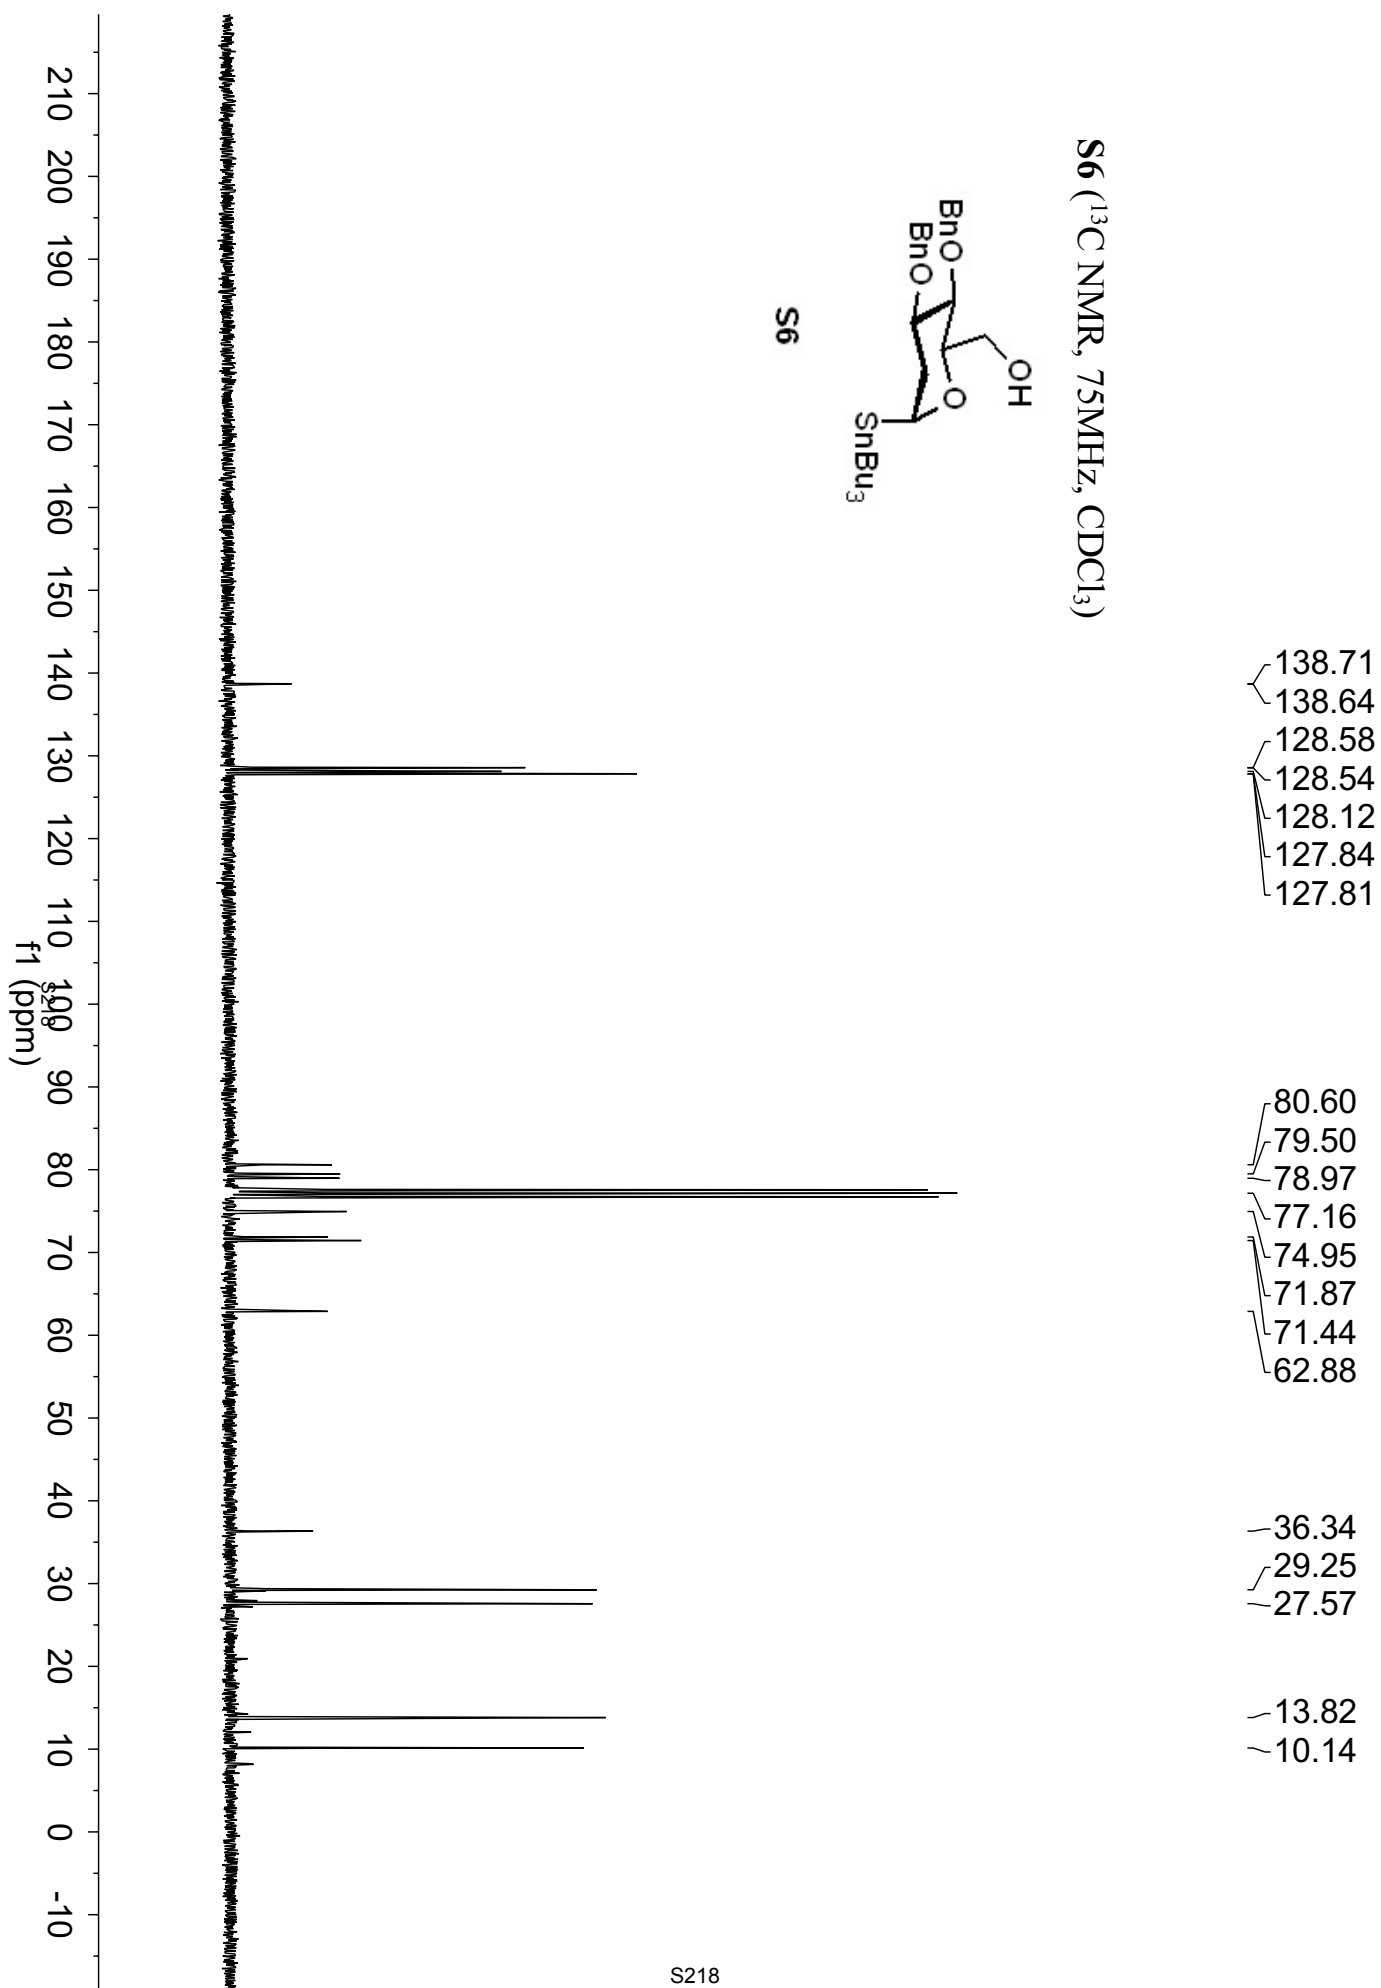

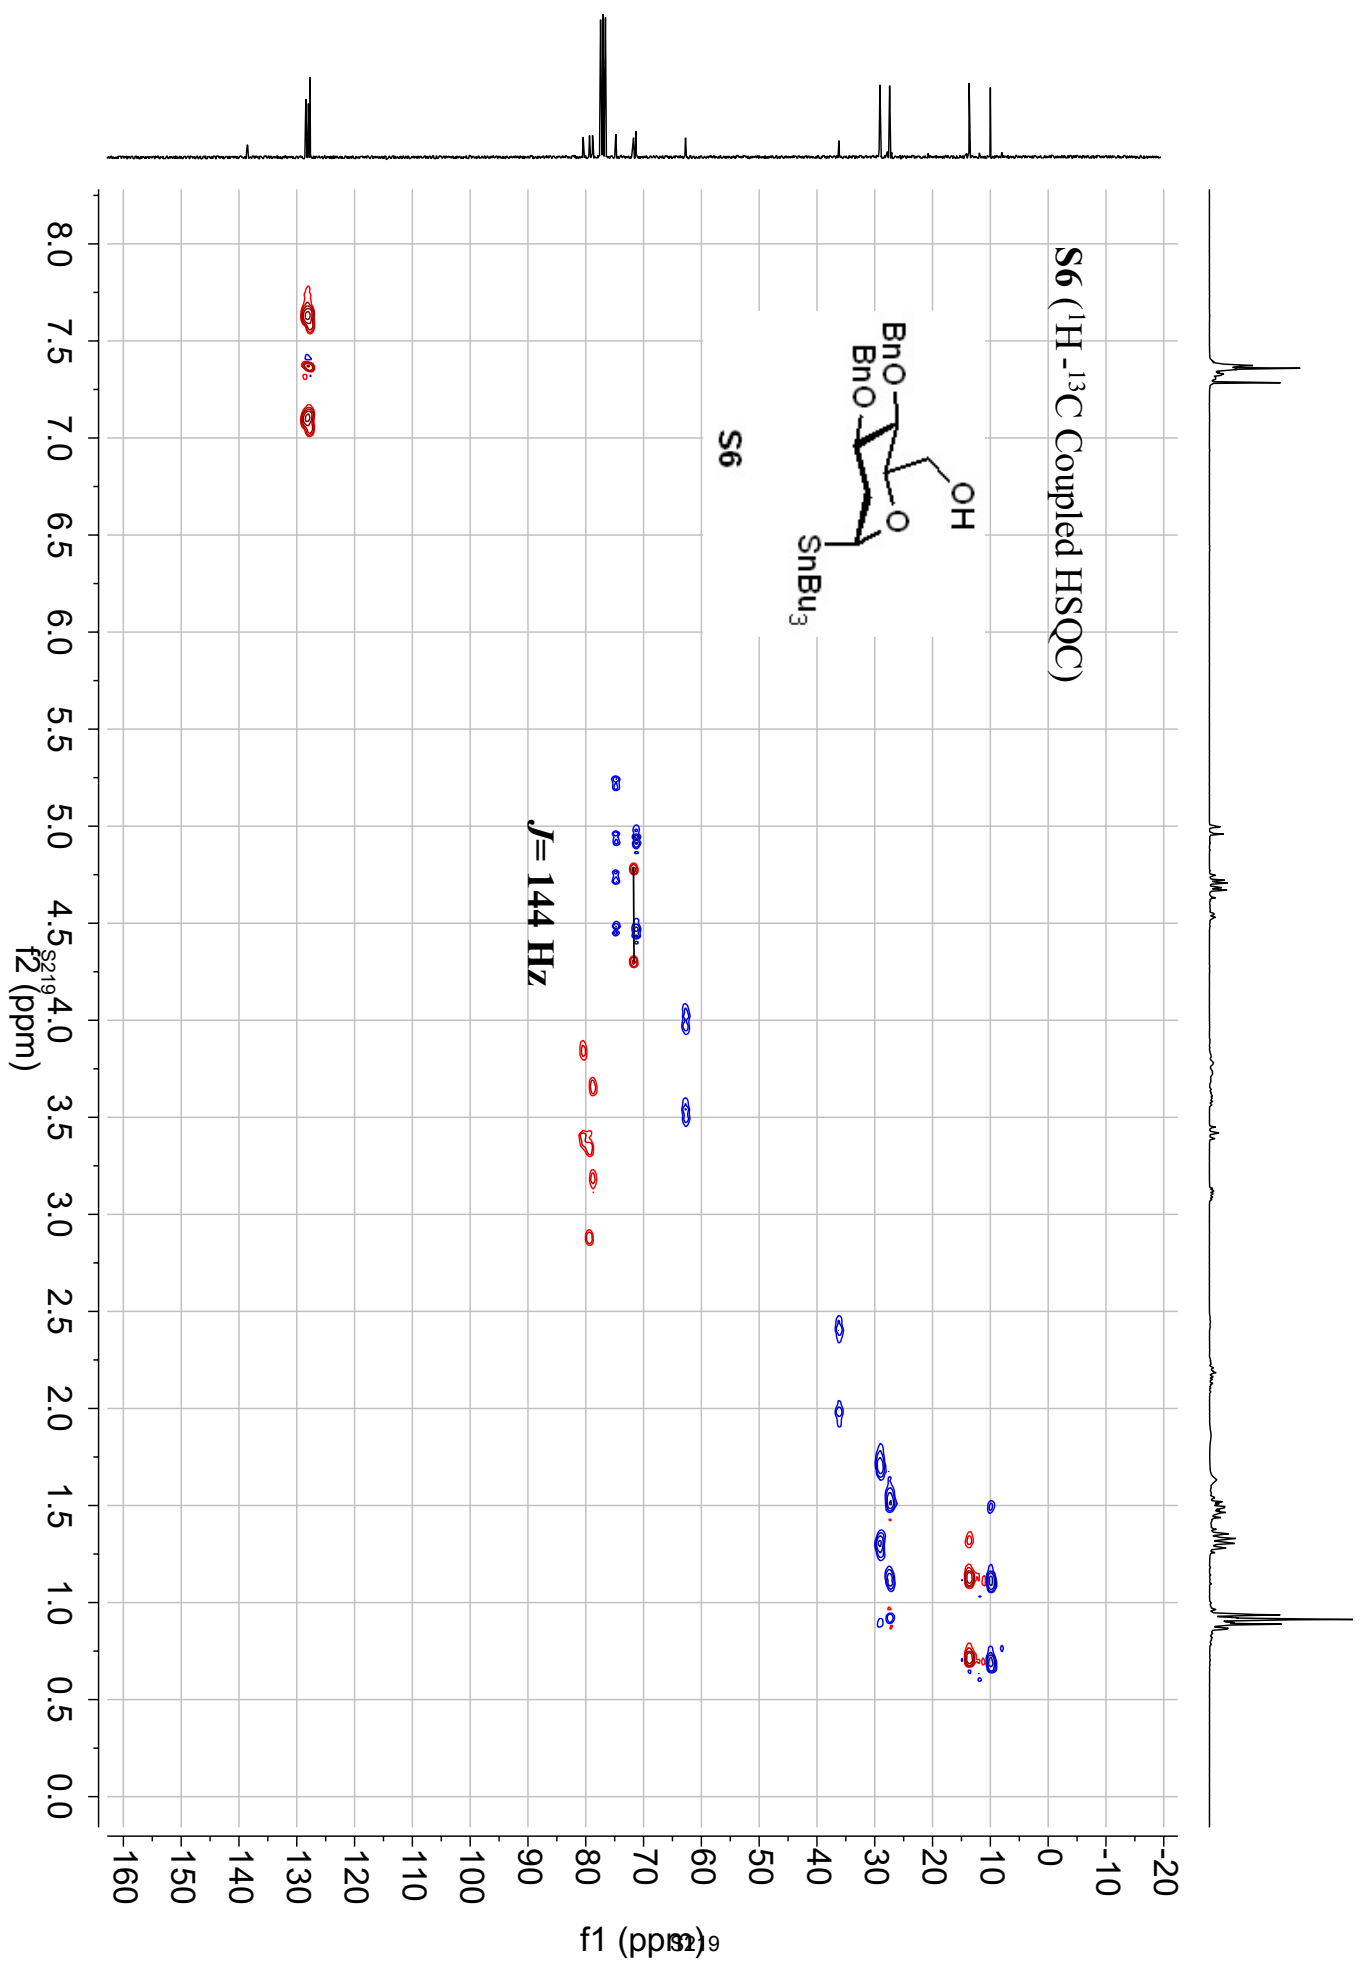

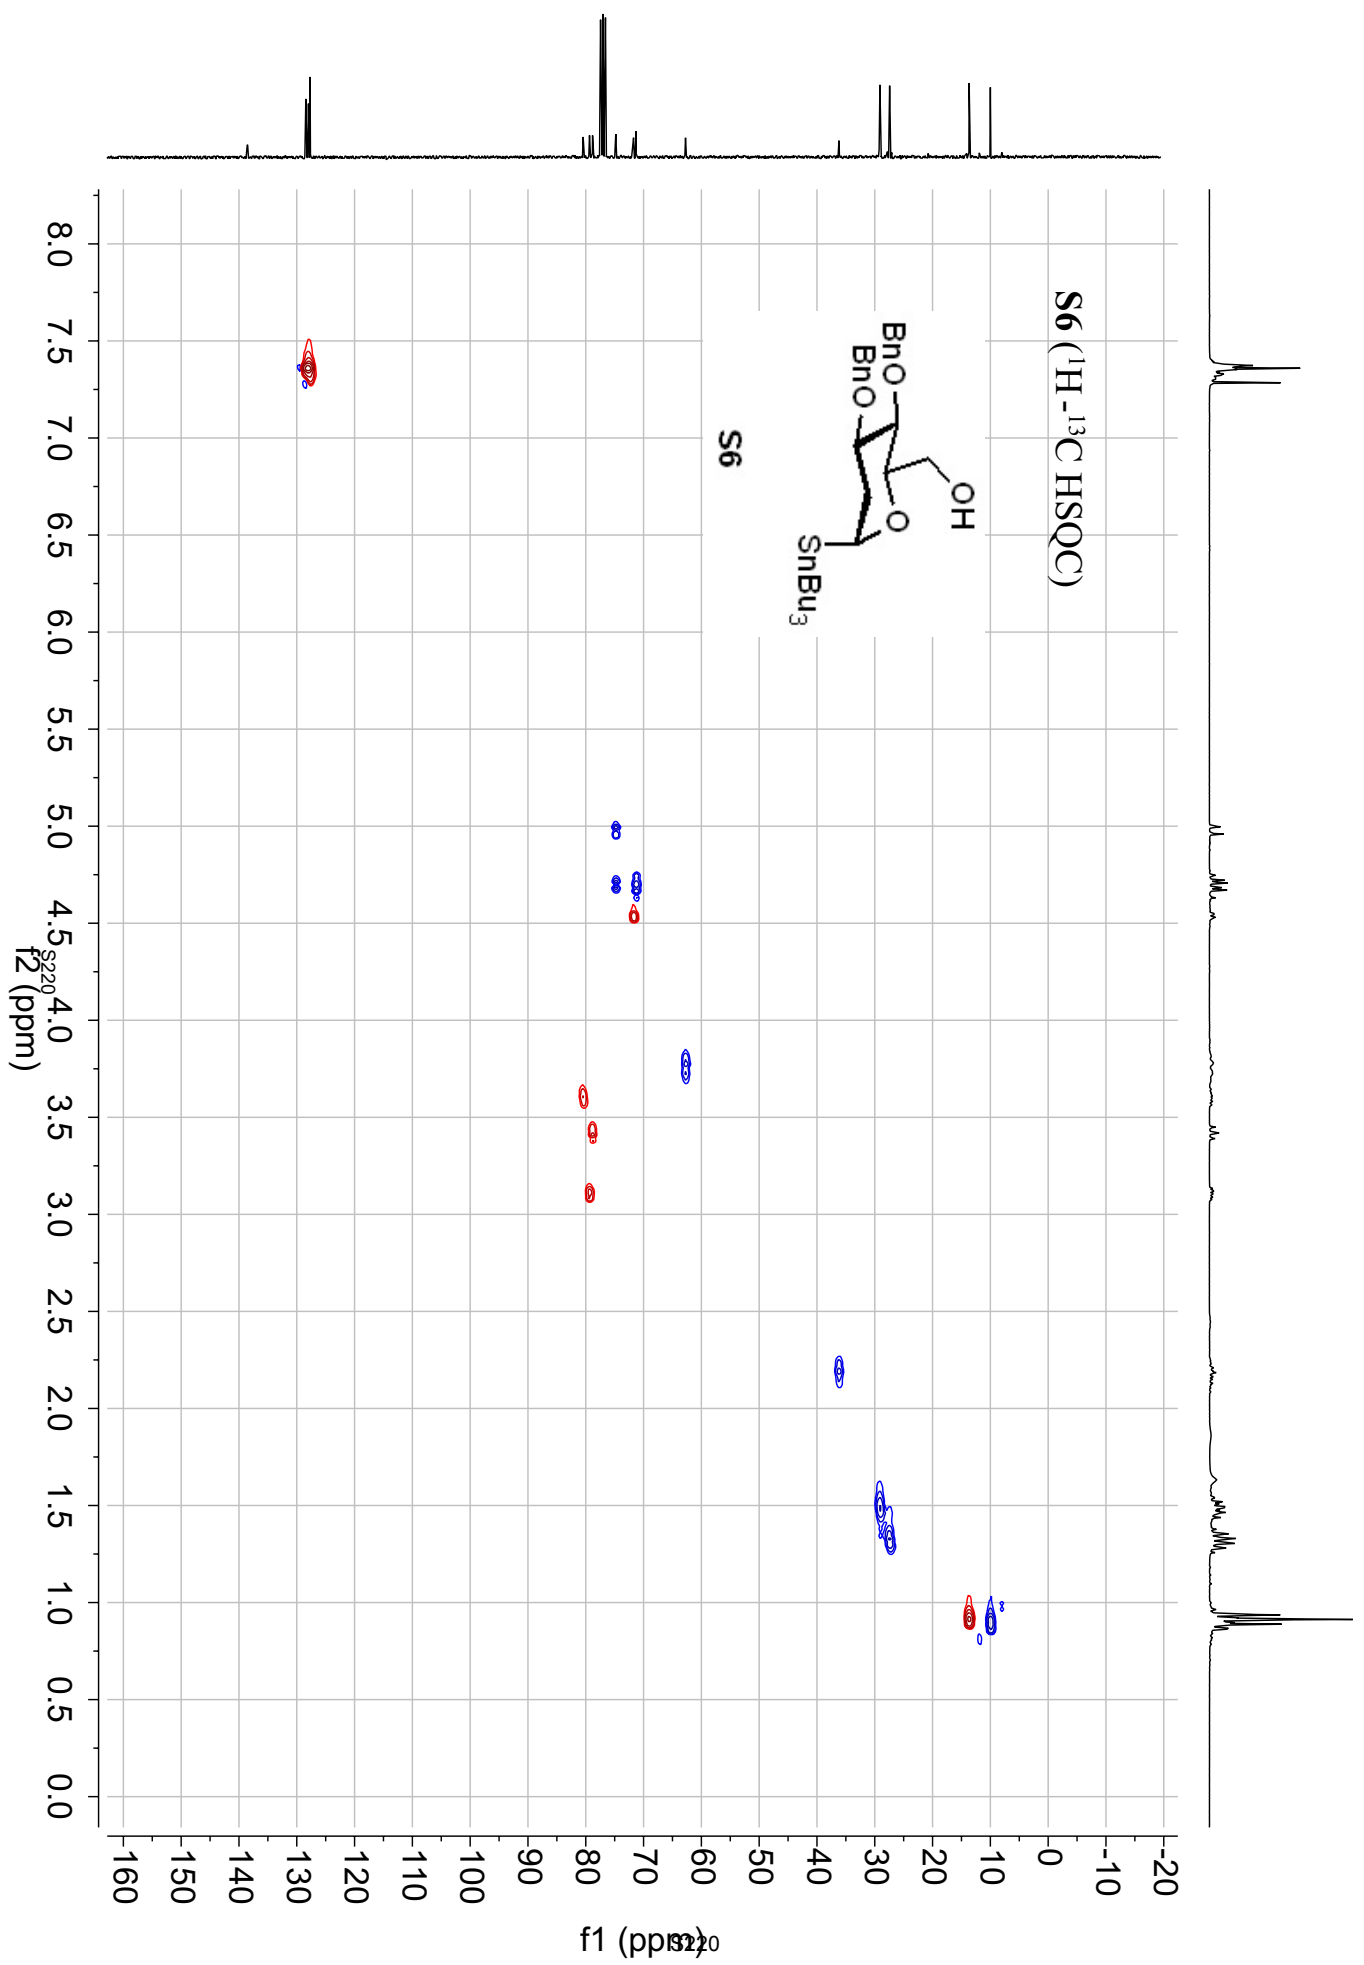



S7 (<sup>13</sup>C NMR, 75MHz, CDCl<sub>3</sub>)

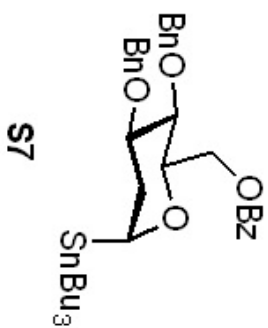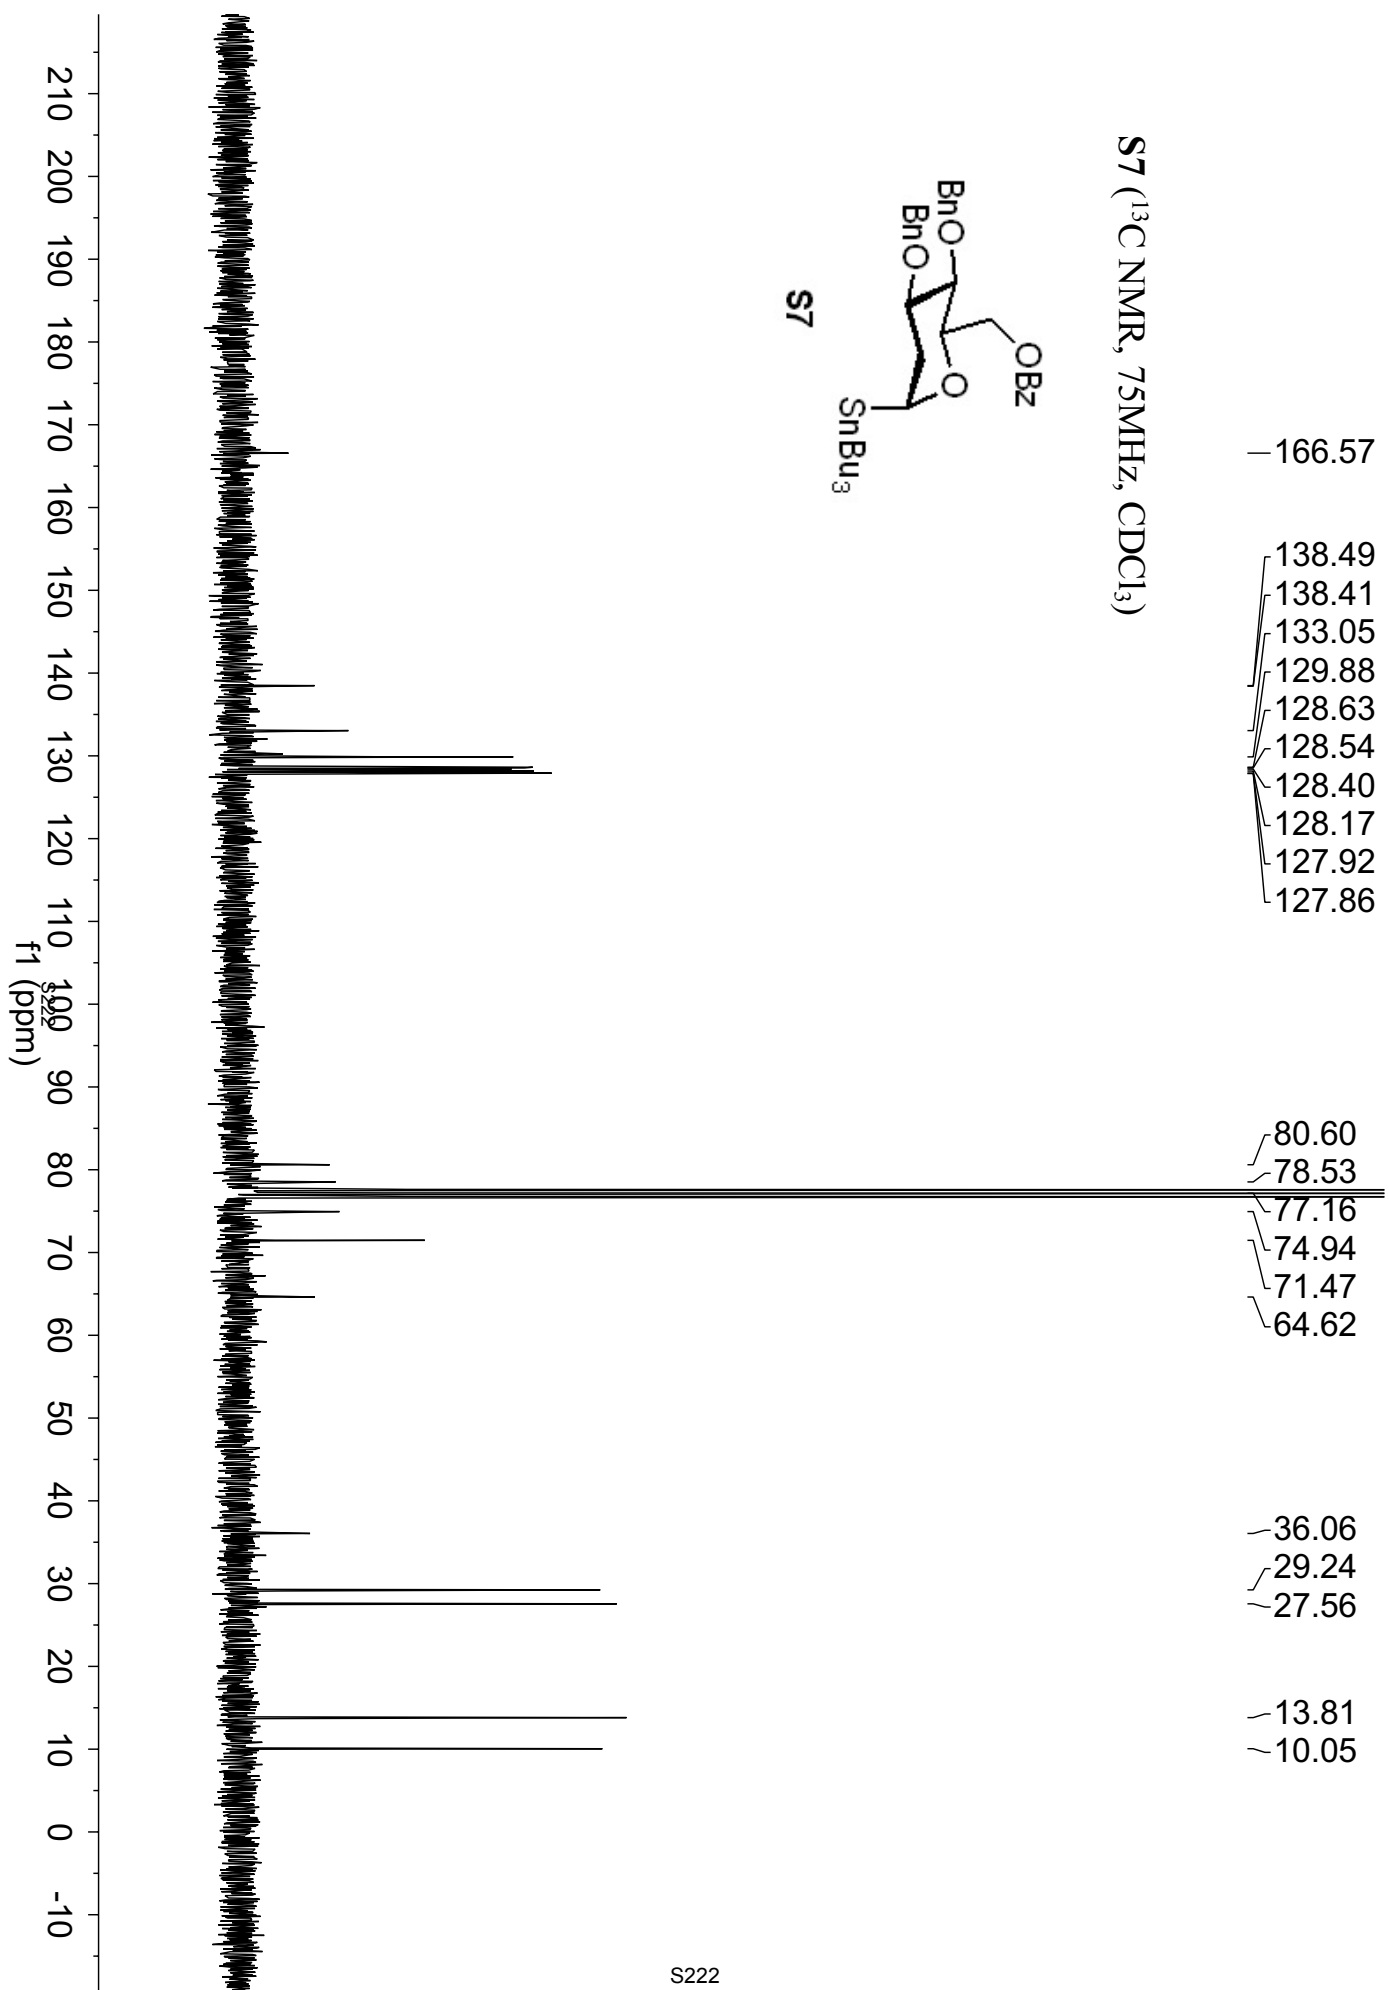



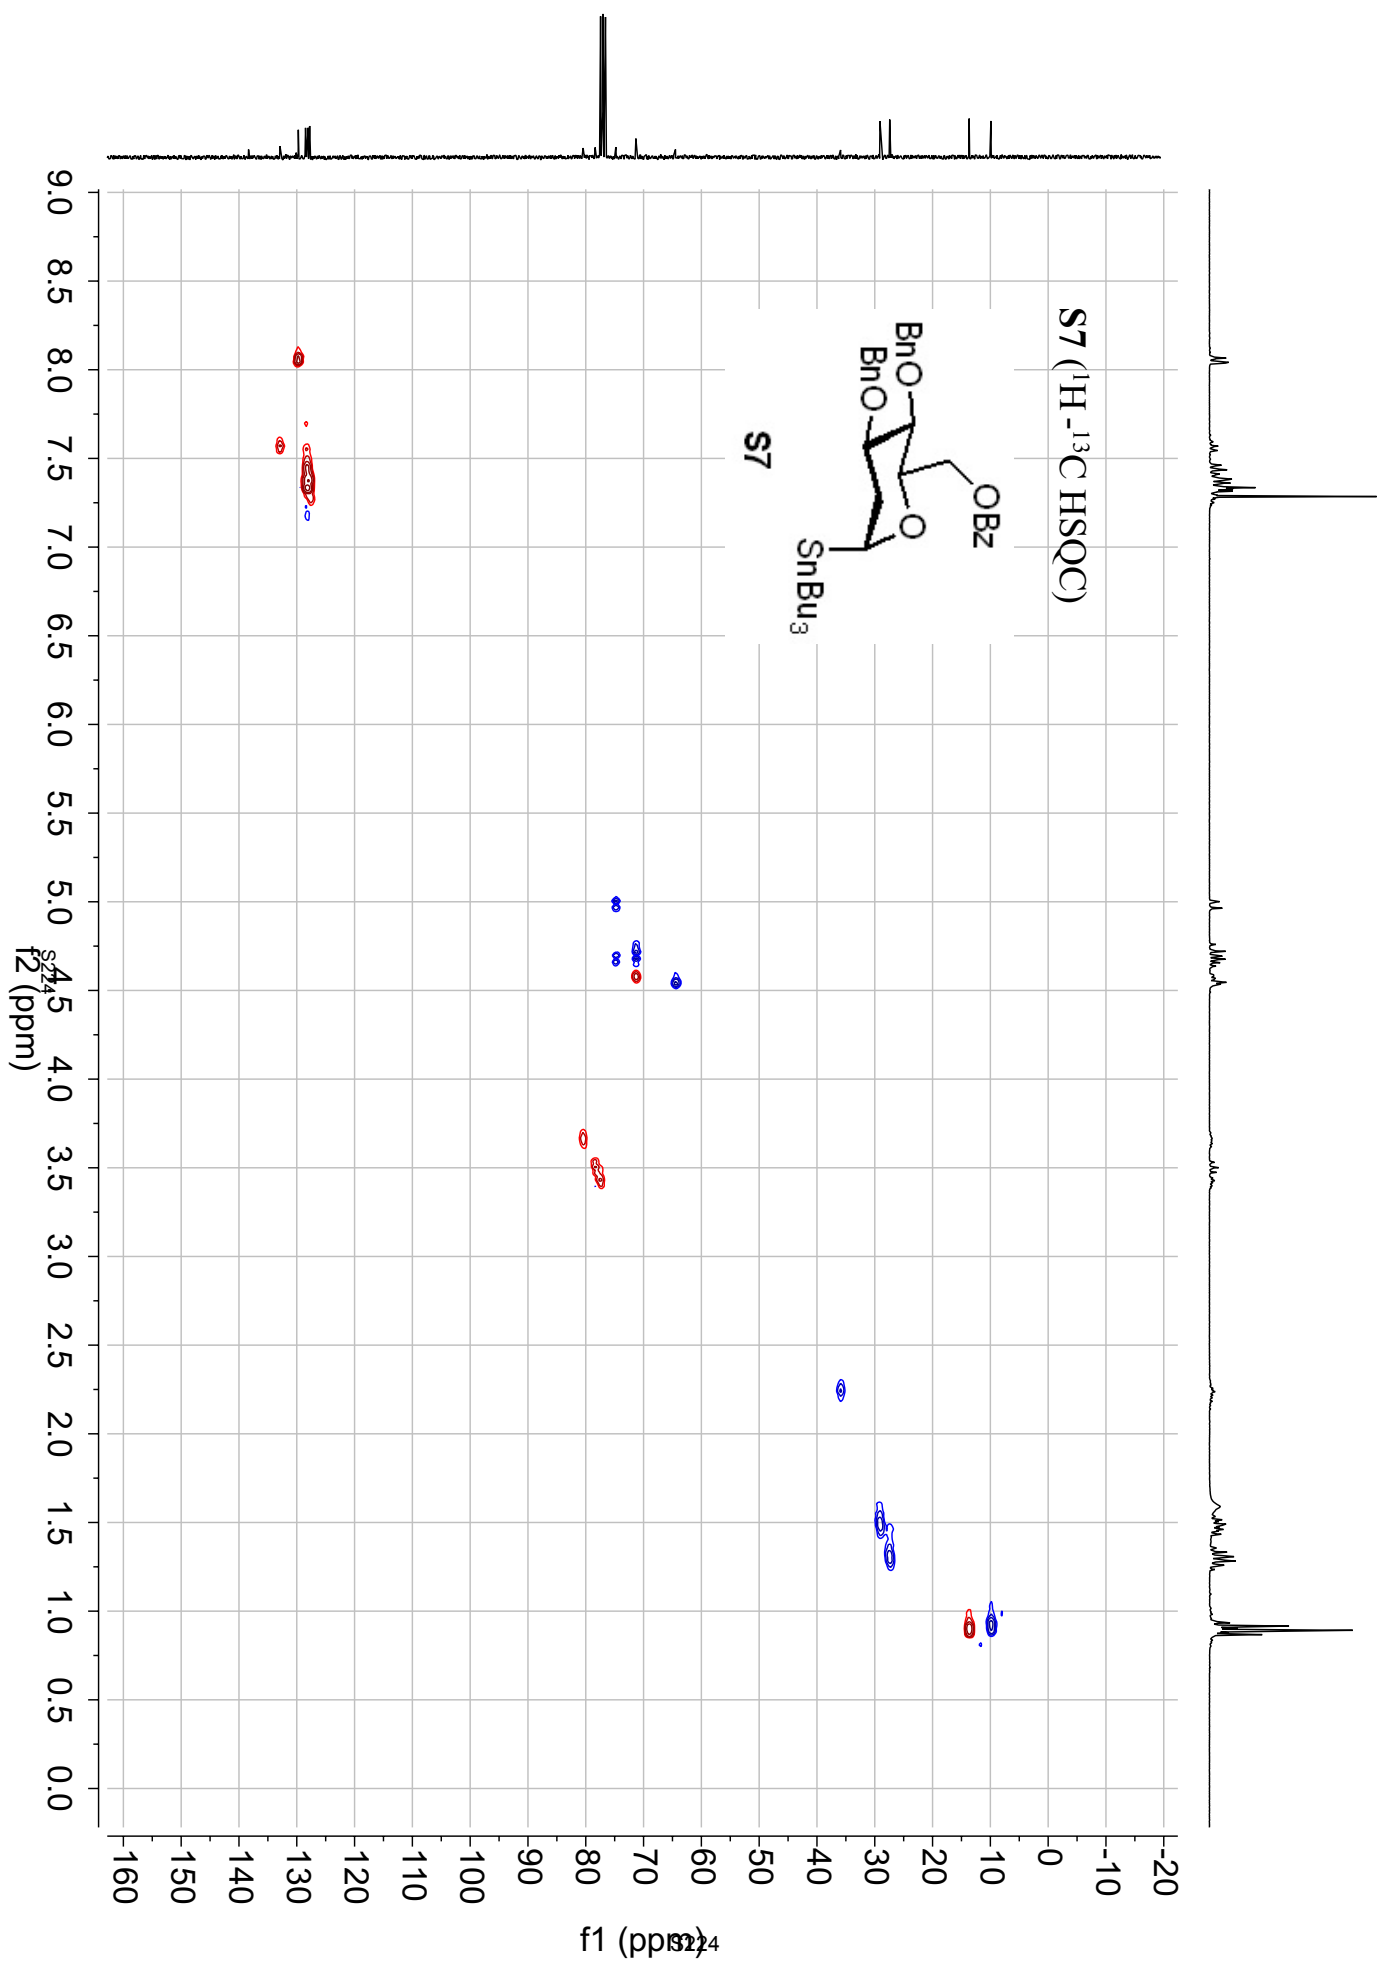



S8 (<sup>1</sup>H NMR, 300MHz, CDCl<sub>3</sub>)

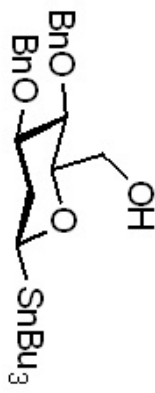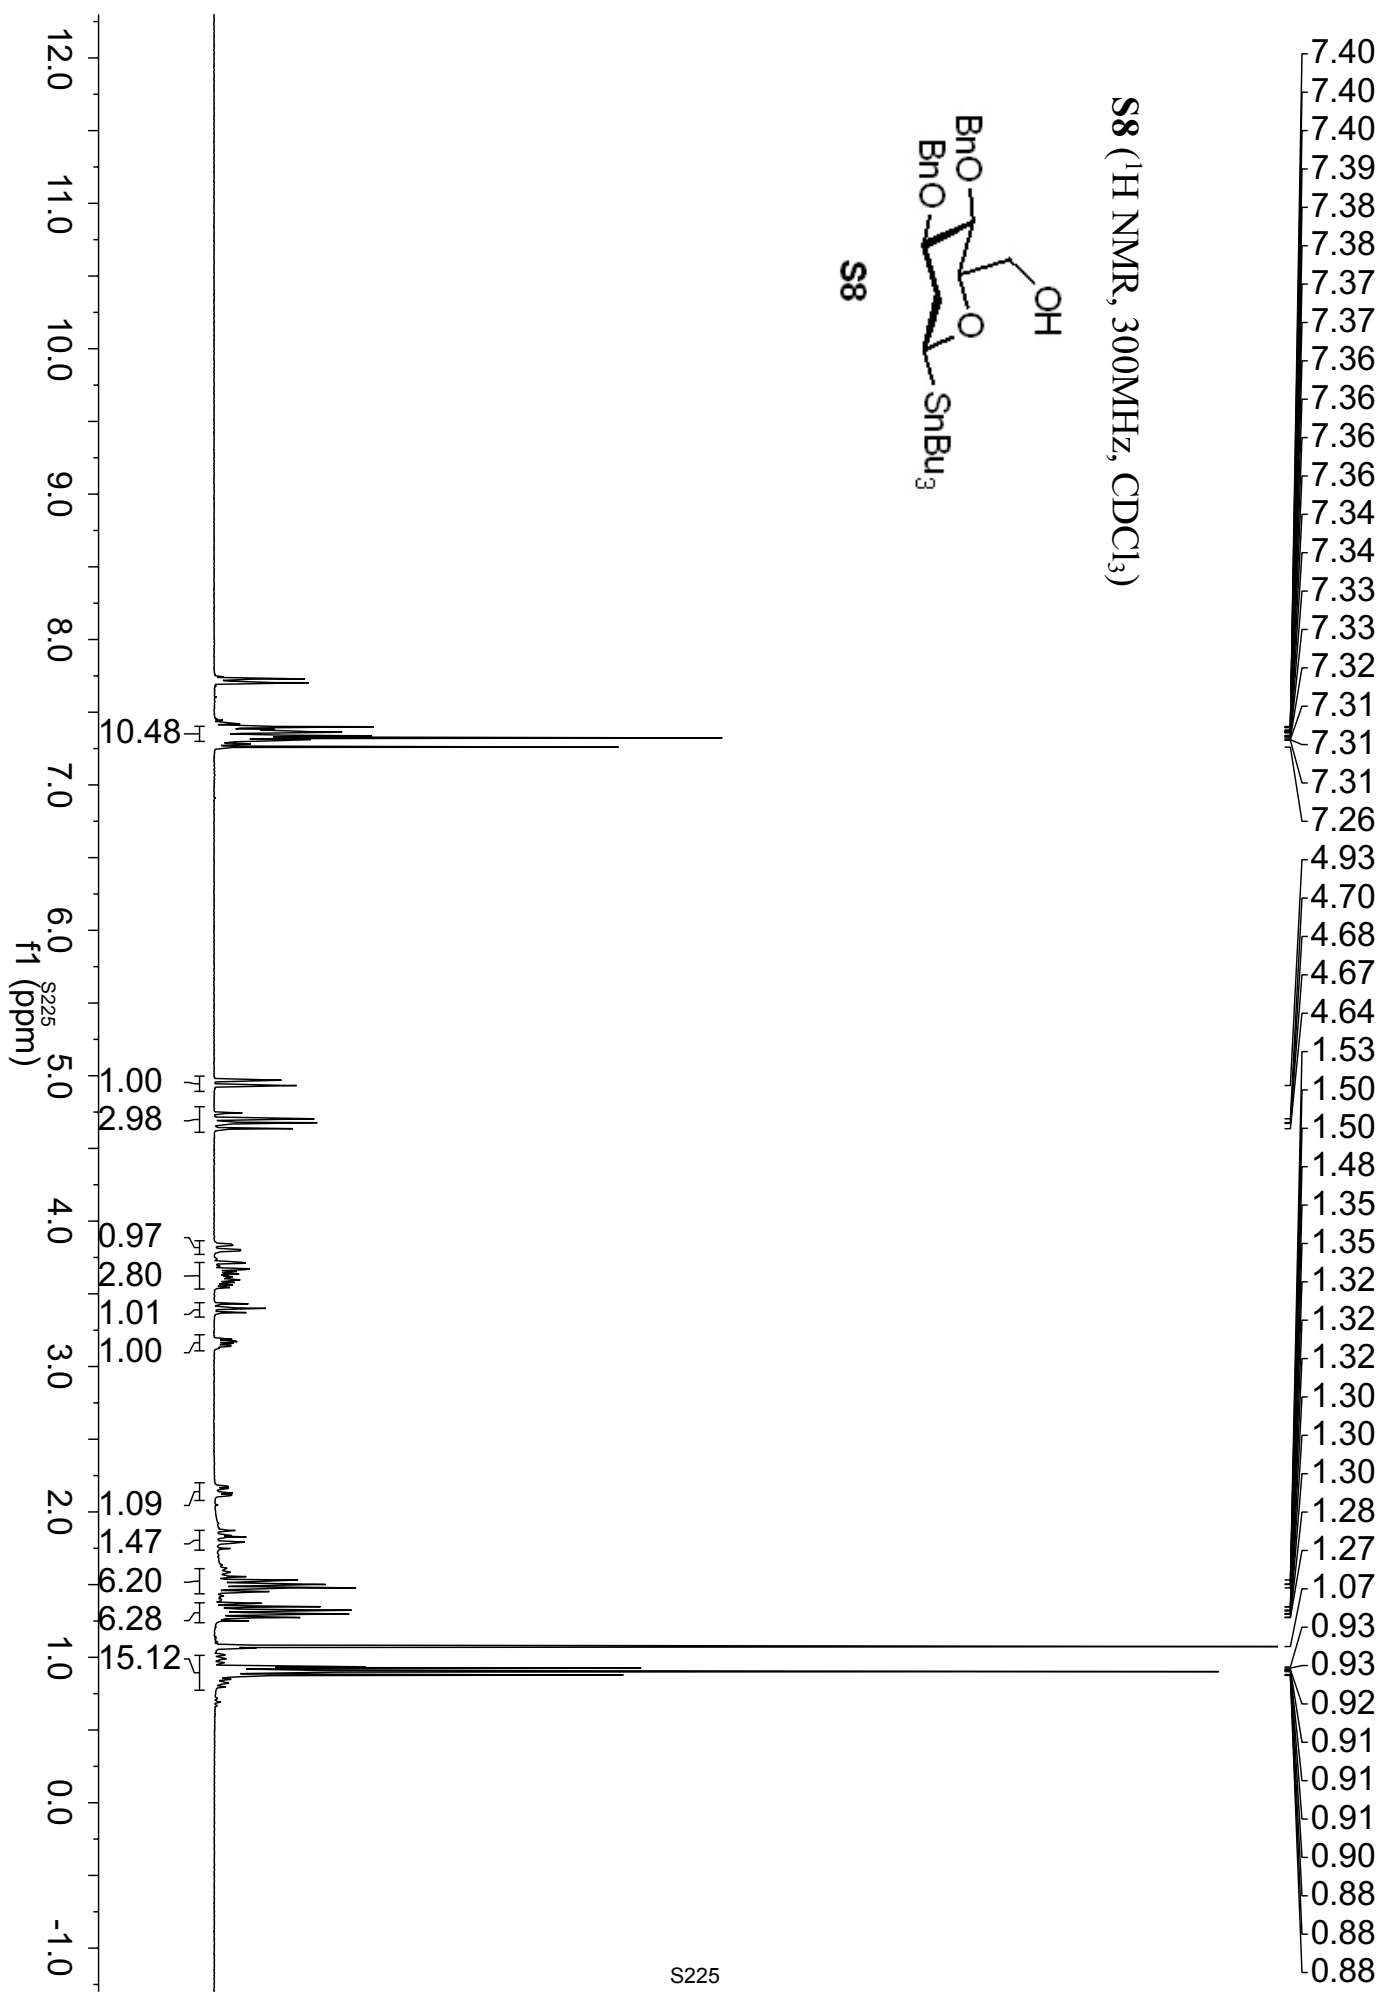

**S8** ( $^{13}\text{C}$  NMR, 75MHz,  $\text{CDCl}_3$ )

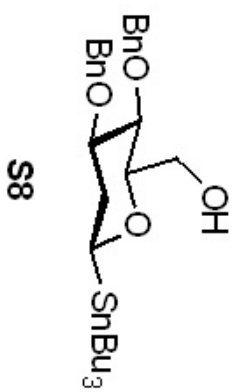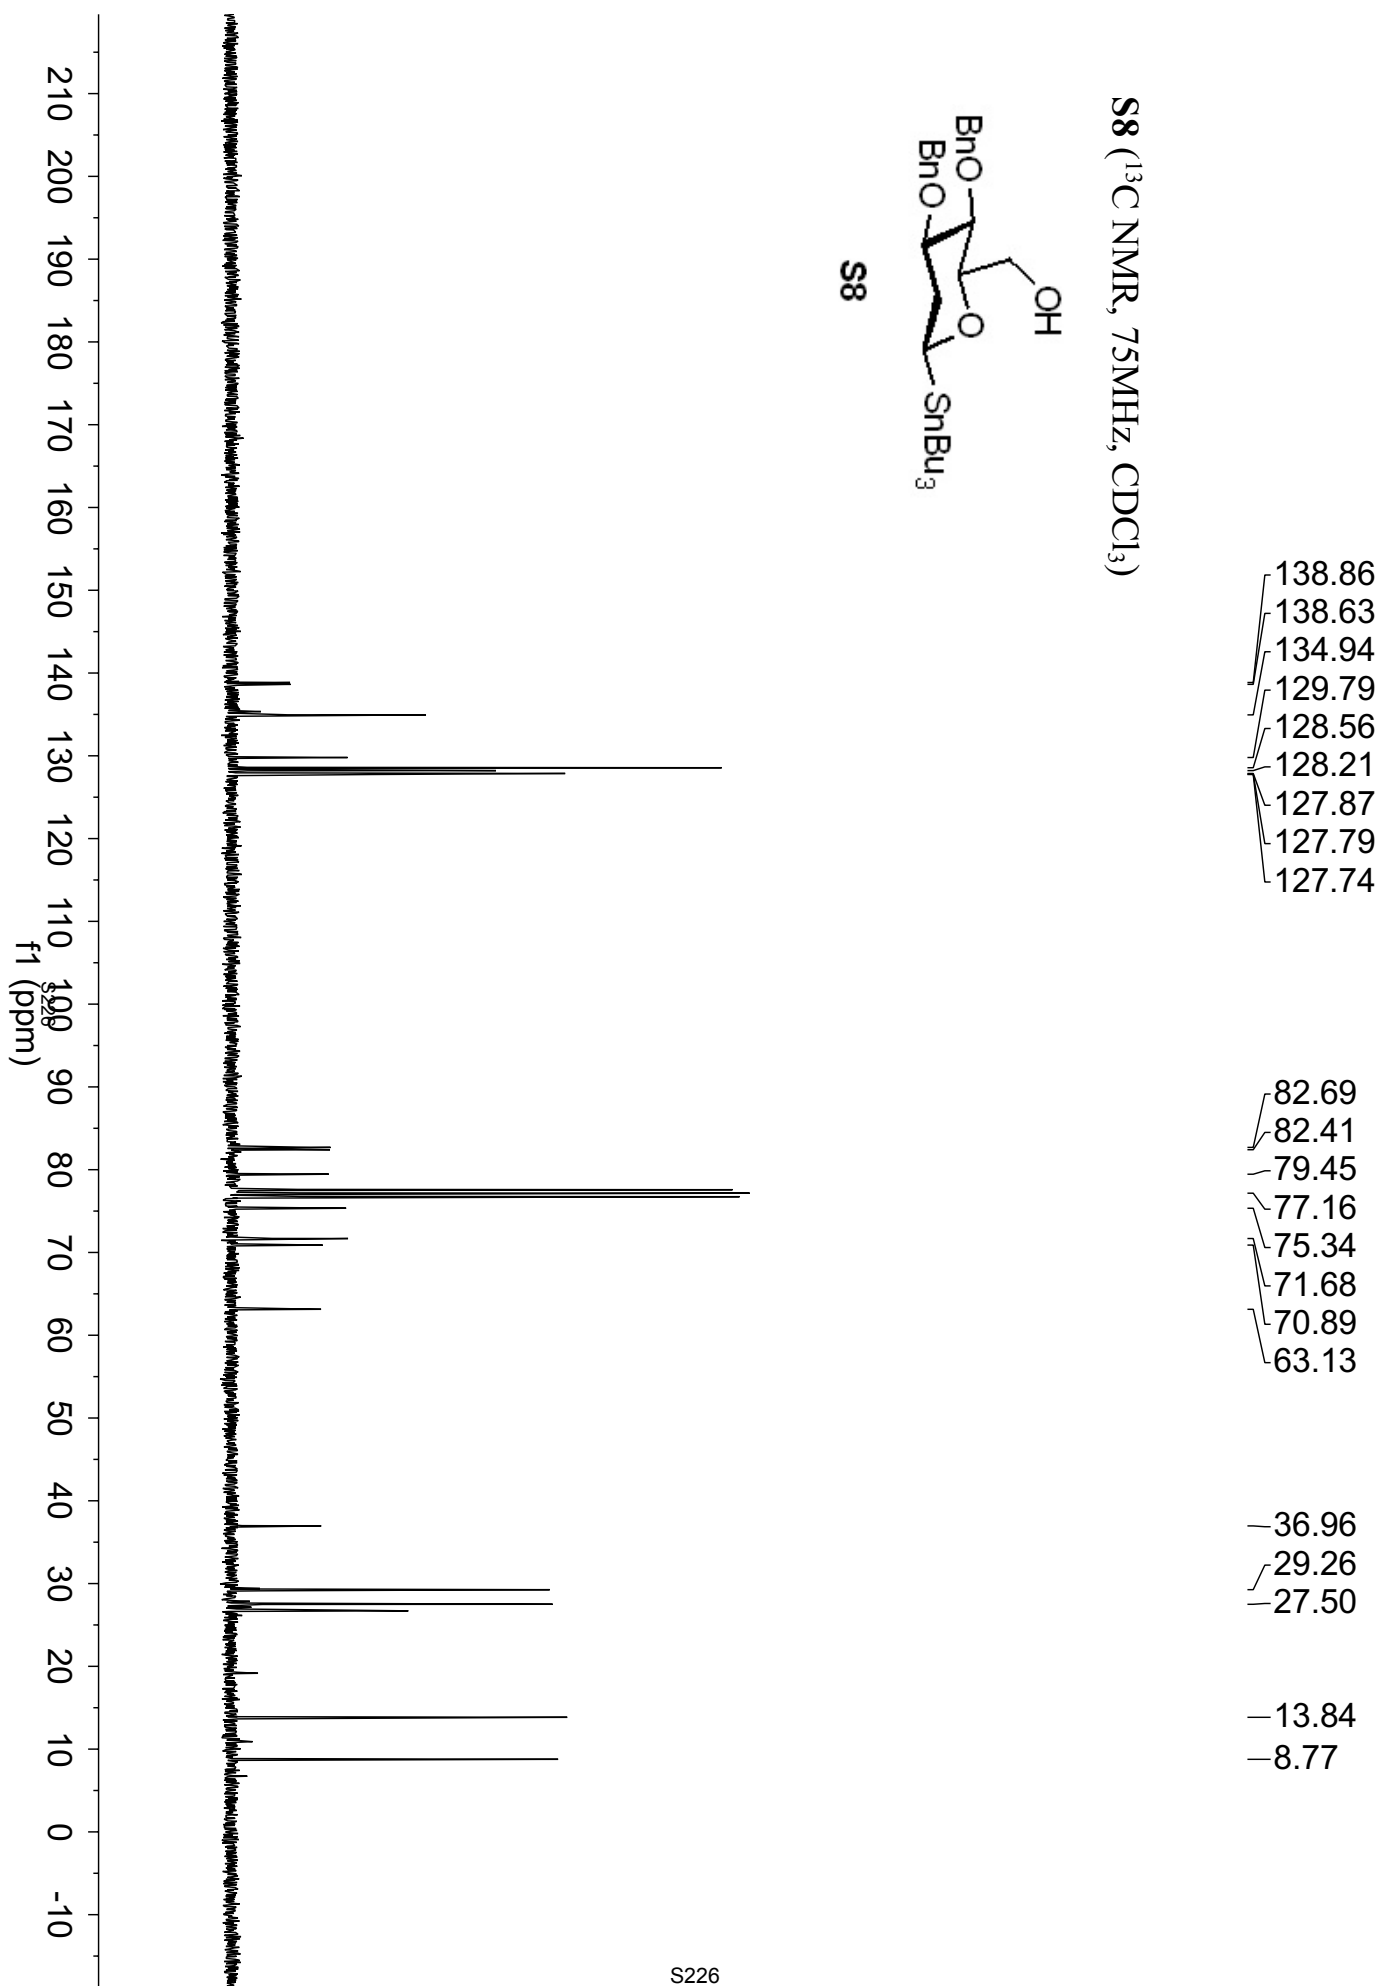

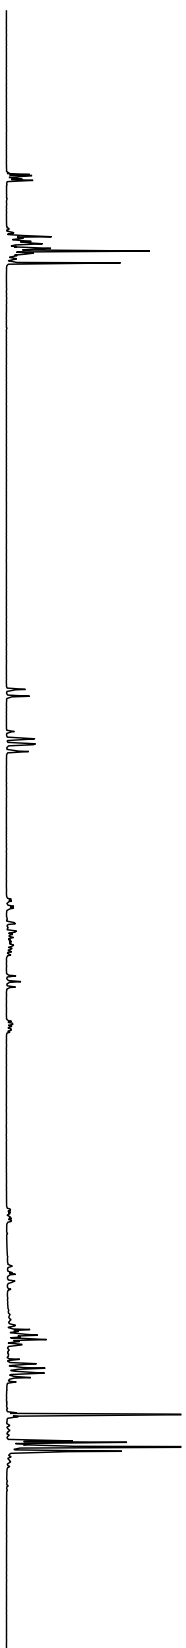

S8 (<sup>1</sup>H-<sup>13</sup>C Coupled HSQC)

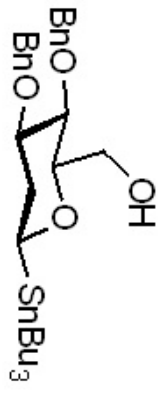

S8

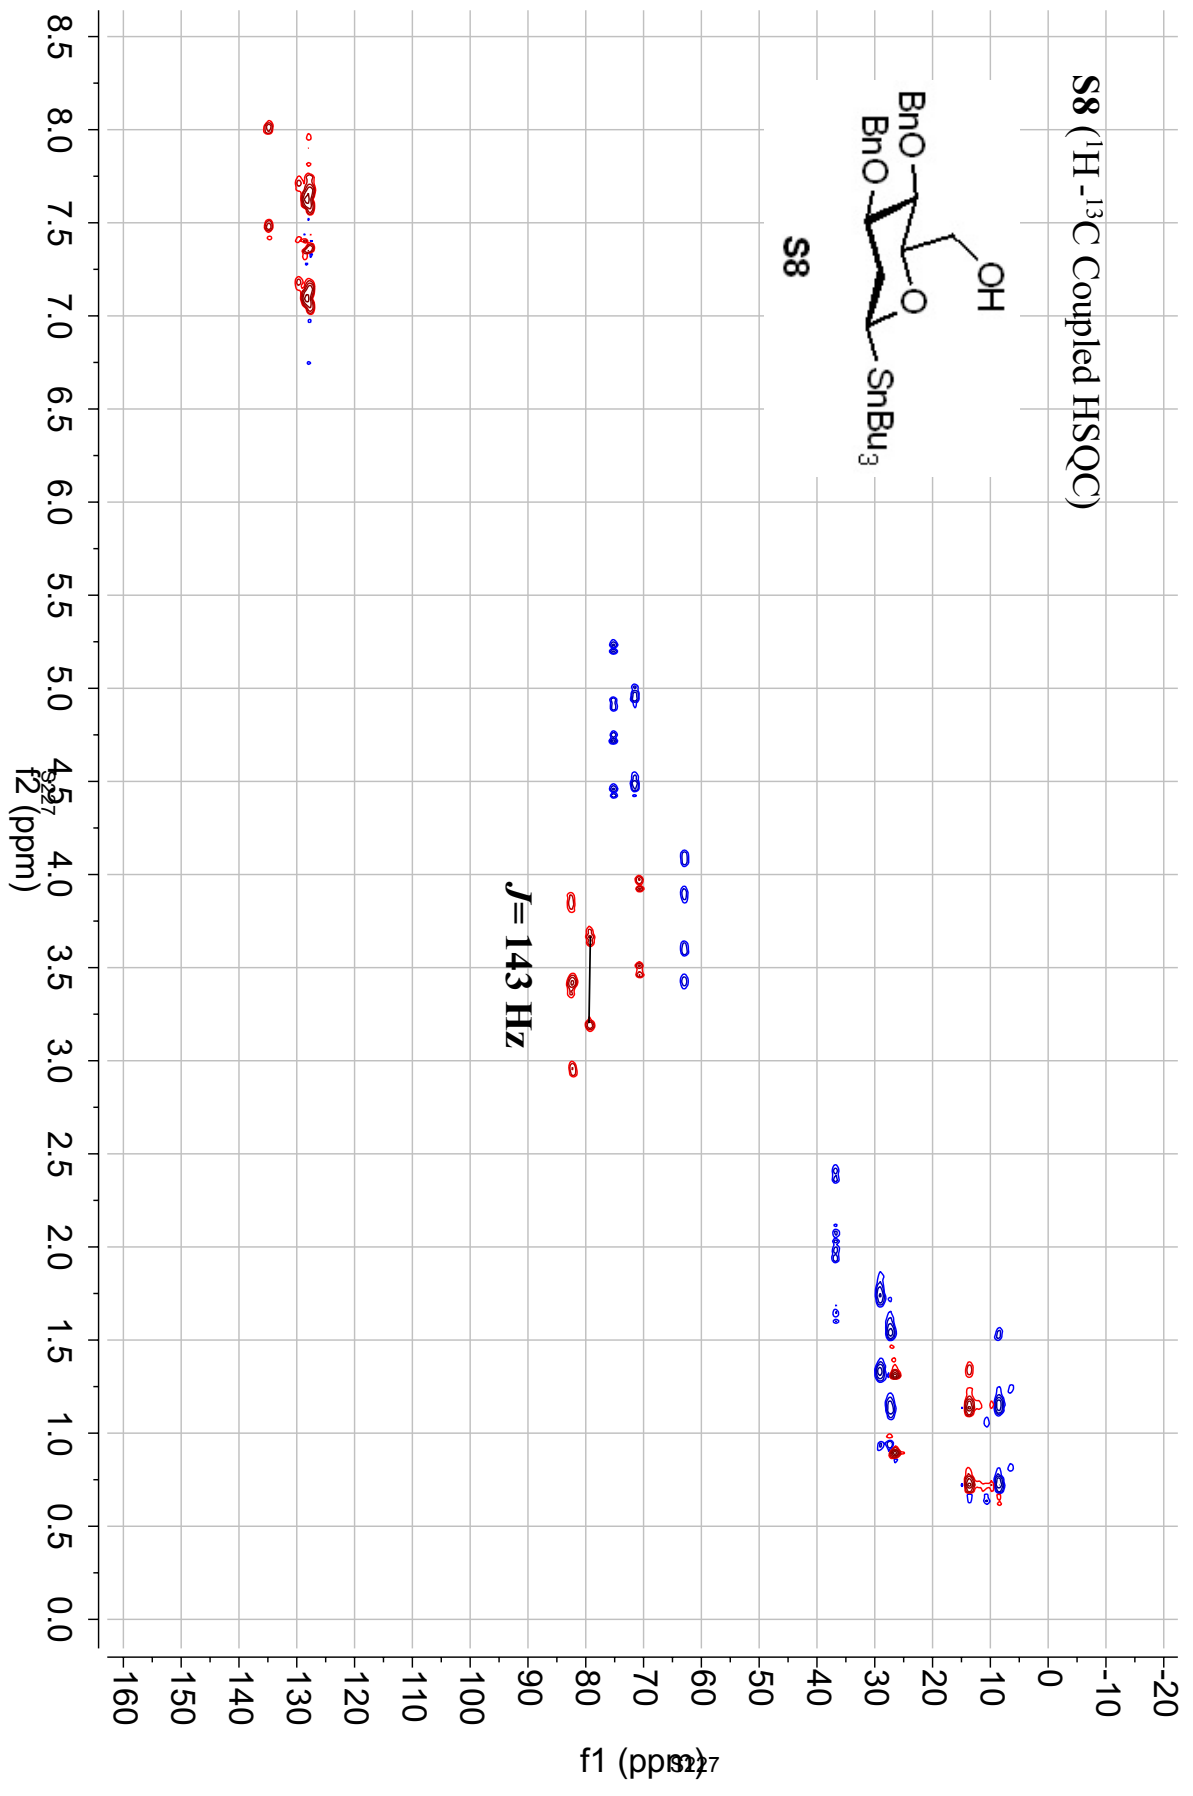

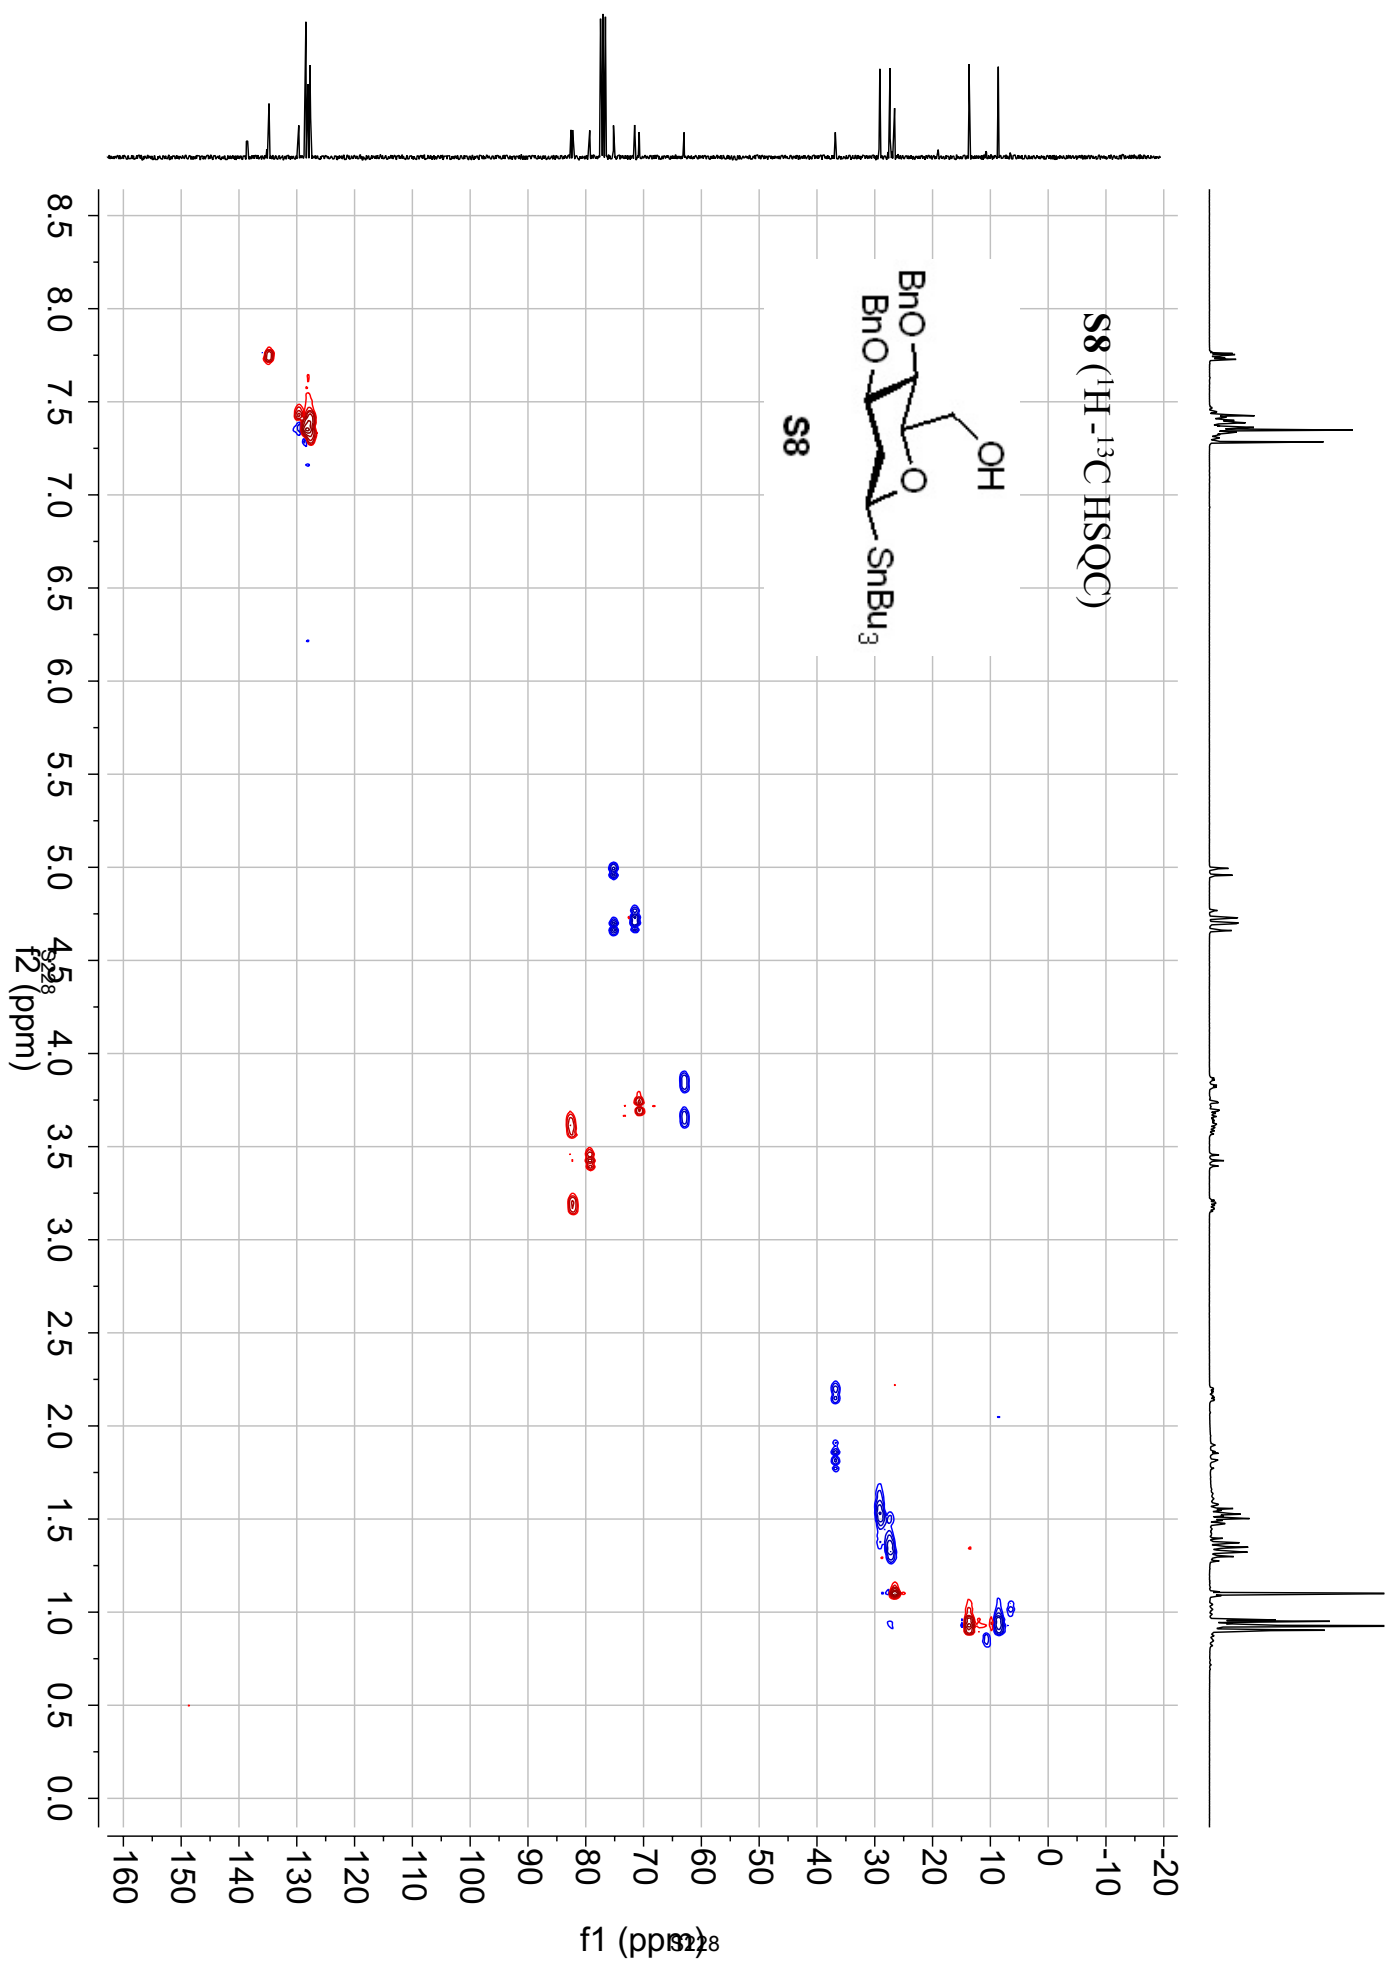



S9 (<sup>1</sup>H NMR, 300MHz, CDCl<sub>3</sub>)

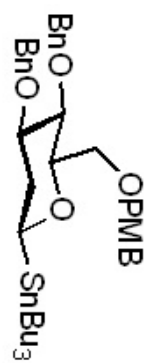

S9

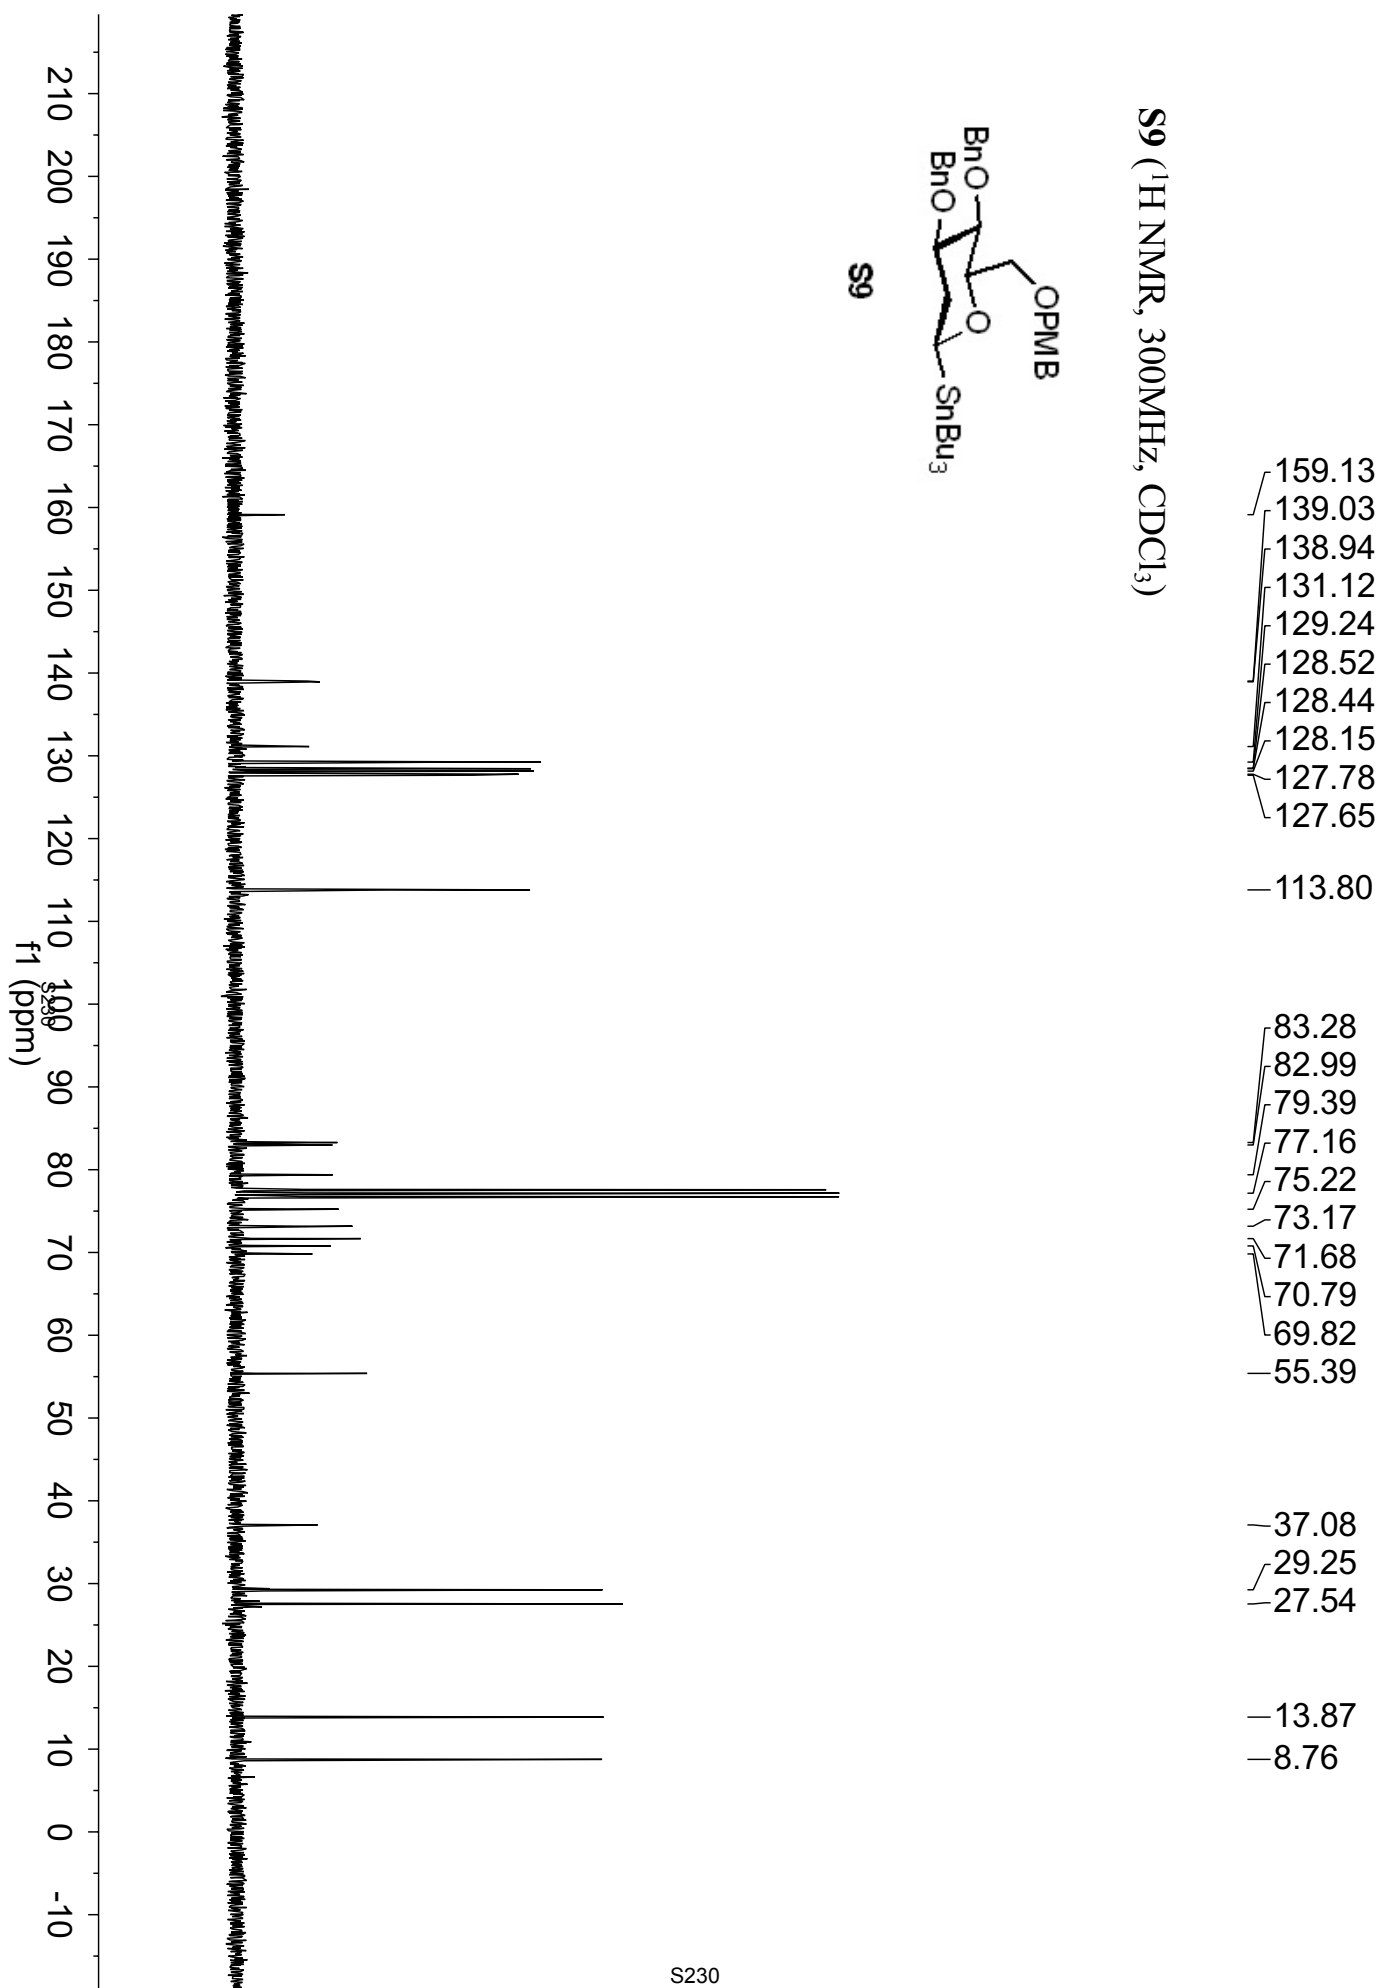

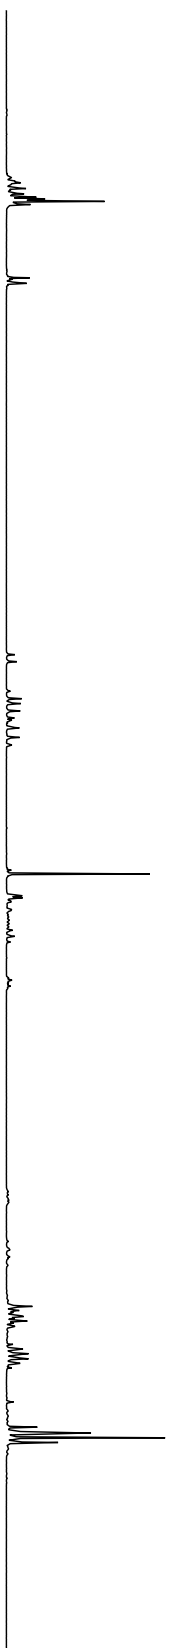

S9 (<sup>1</sup>H NMR, 300MHz, CDCl<sub>3</sub>)

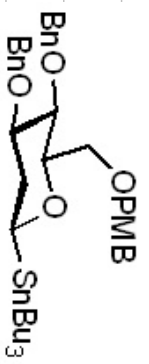

S9

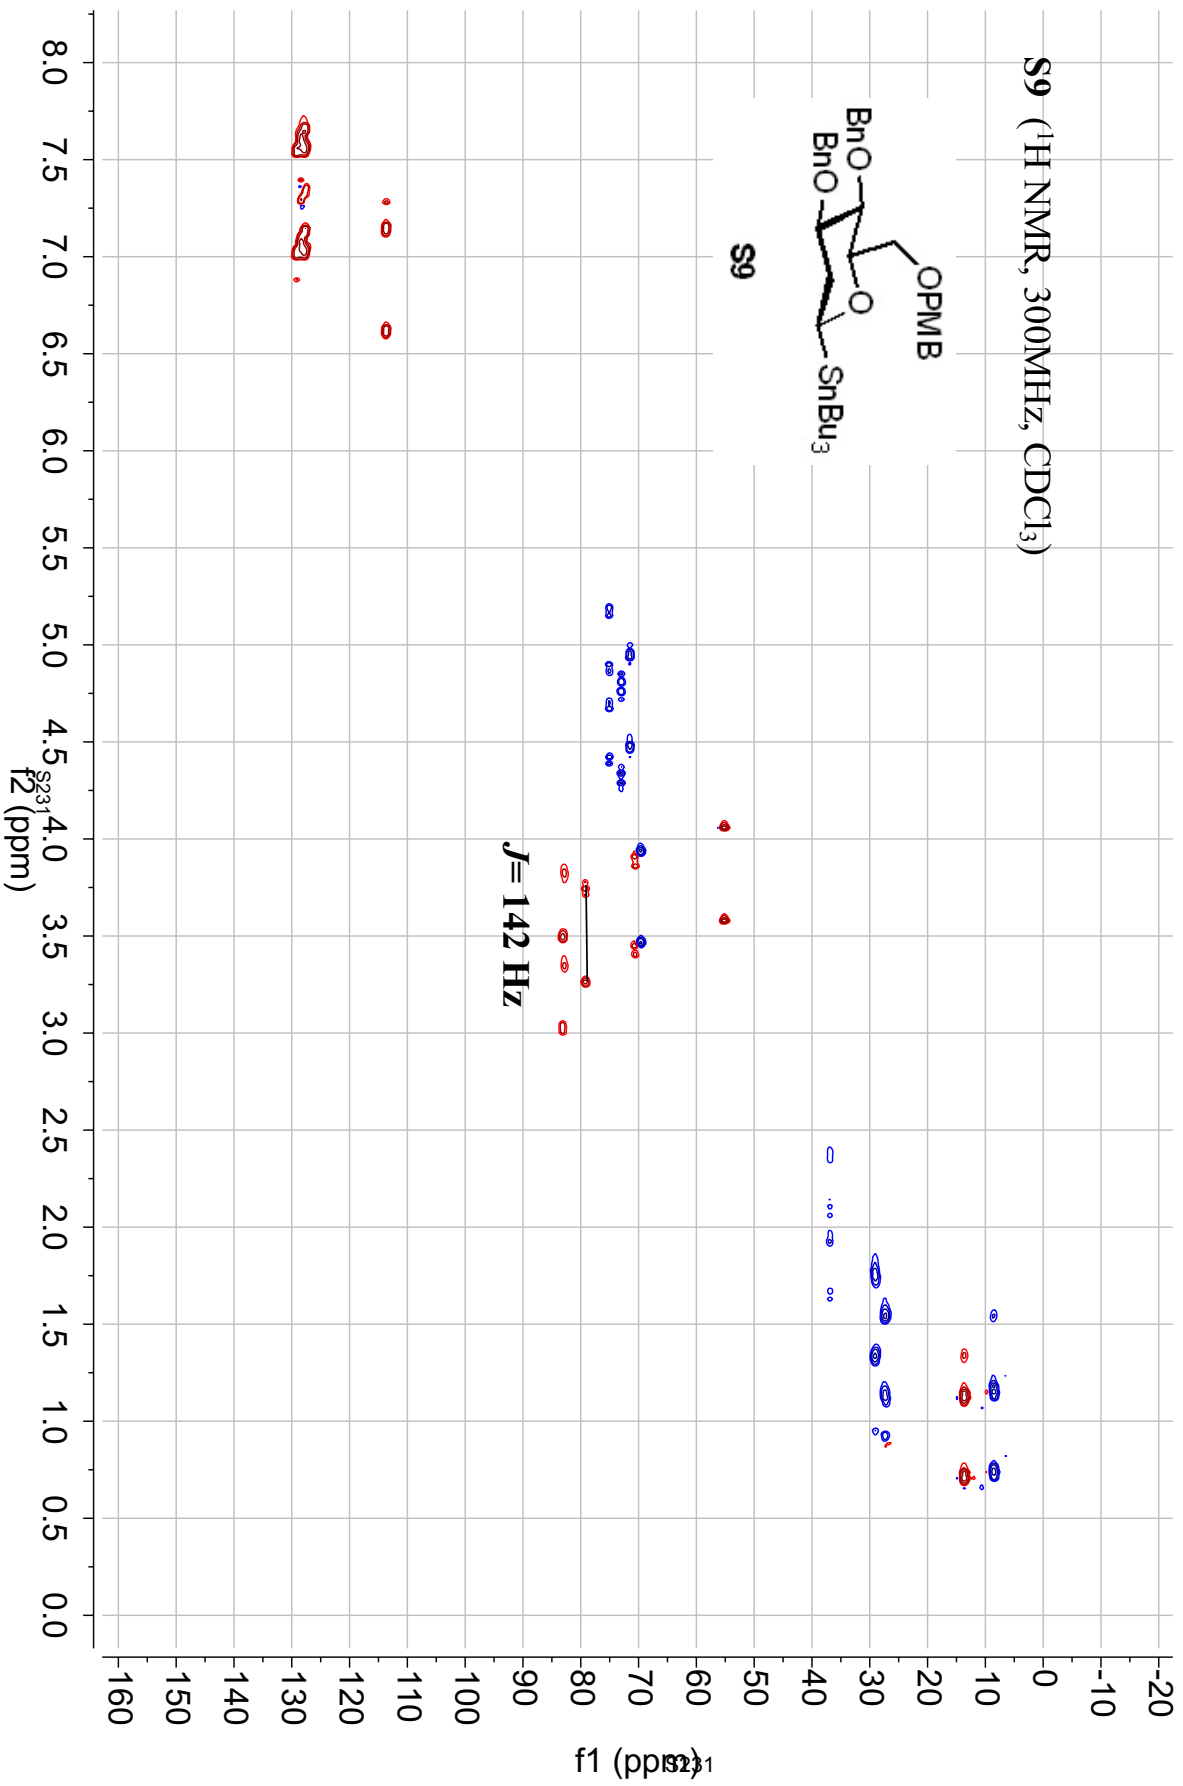





S10 (<sup>1</sup>H NMR, 300MHz, CDCl<sub>3</sub>)

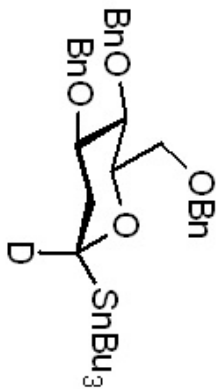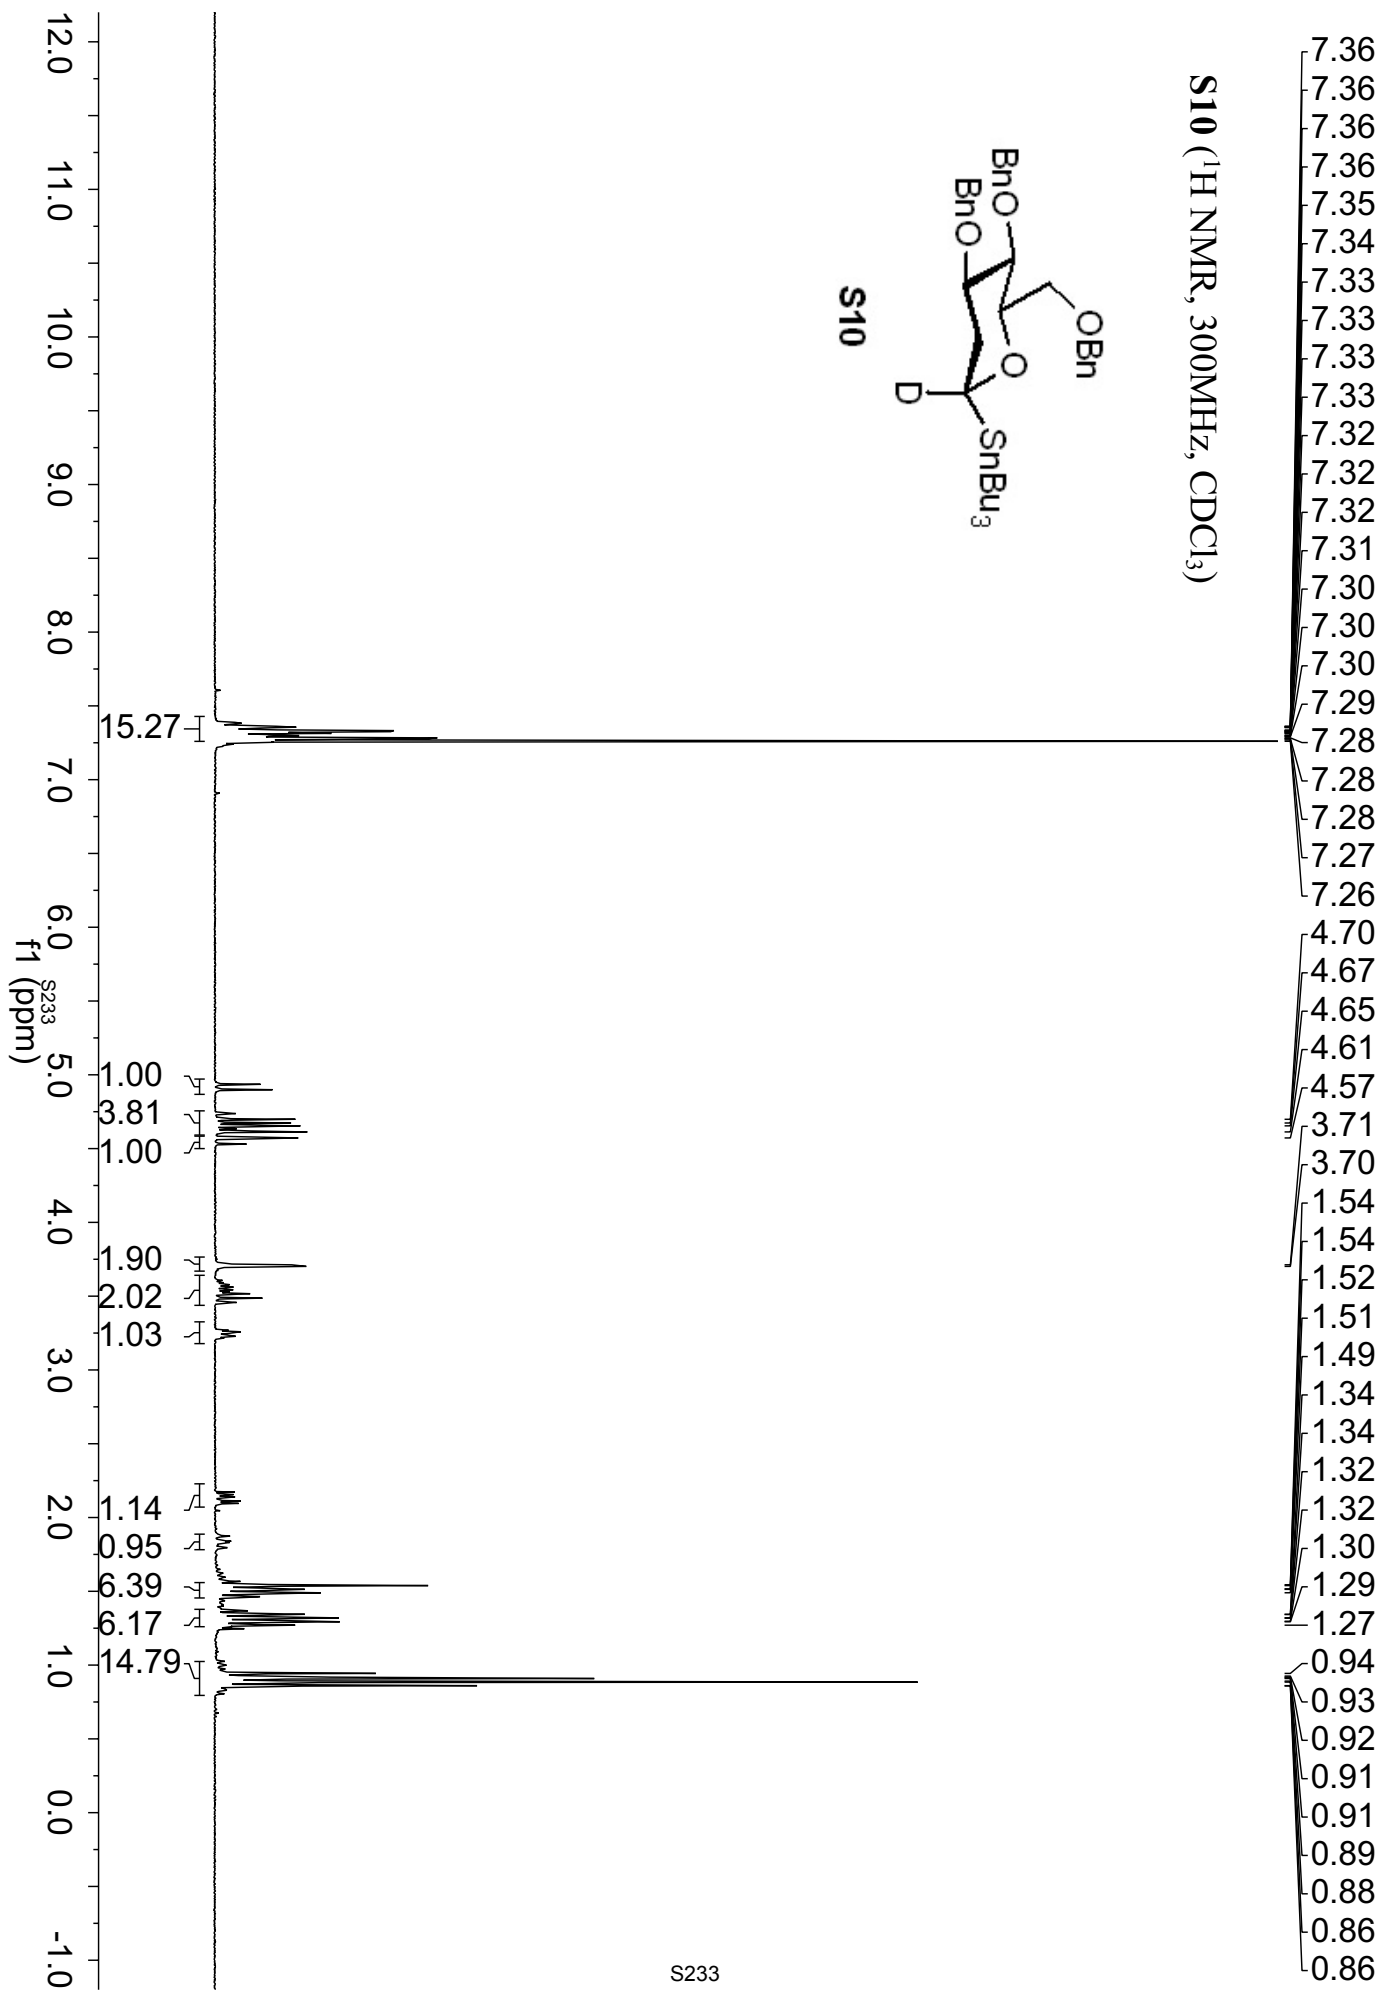

S10 (<sup>13</sup>C NMR, 75MHz, CDCl<sub>3</sub>)

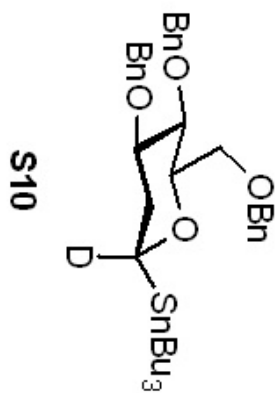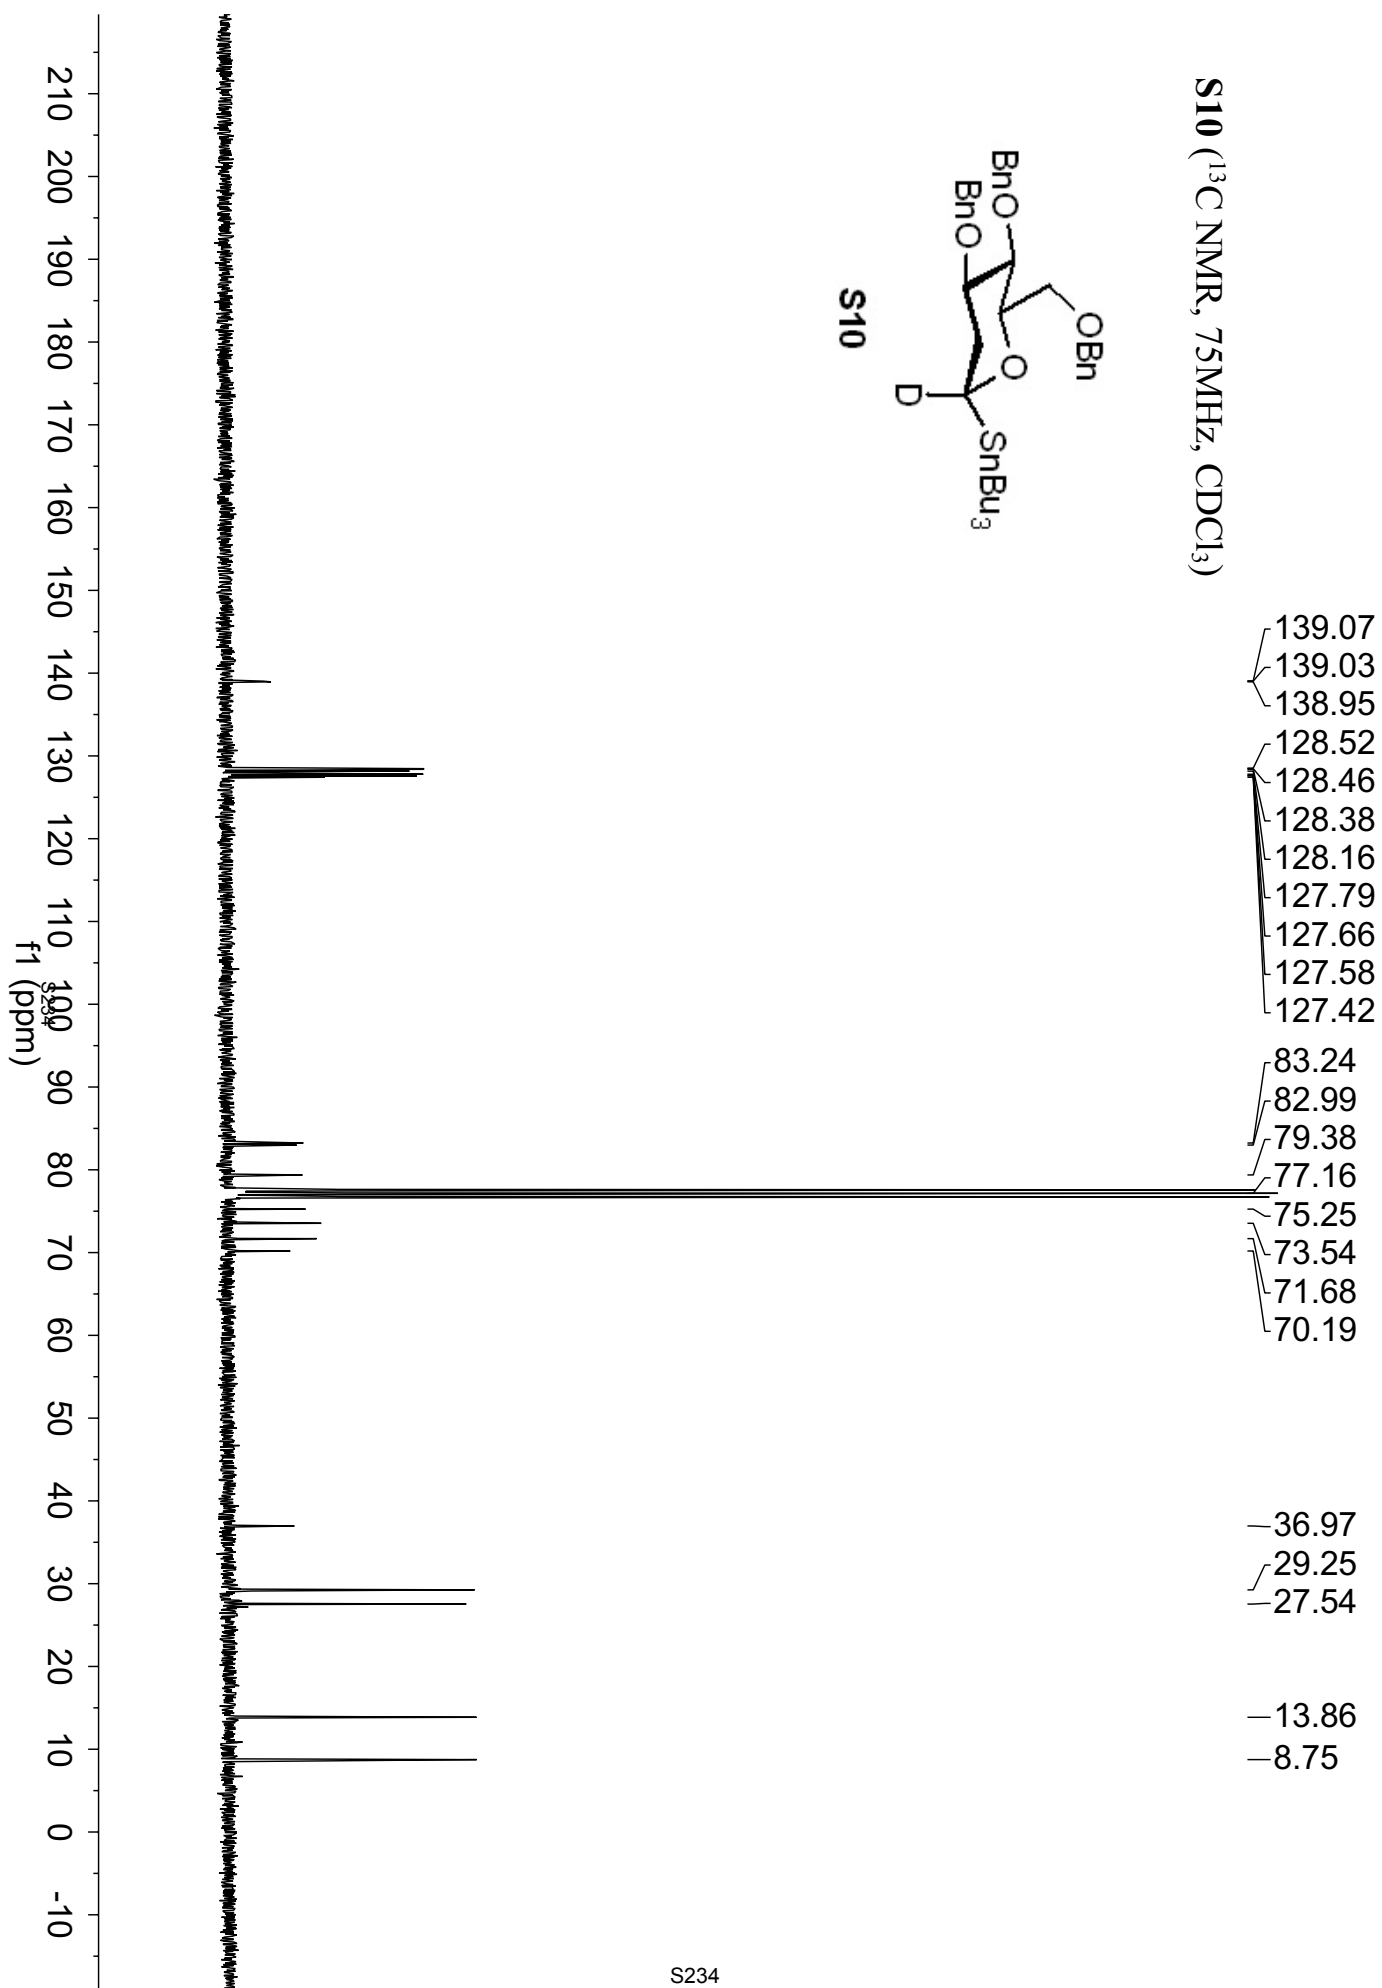

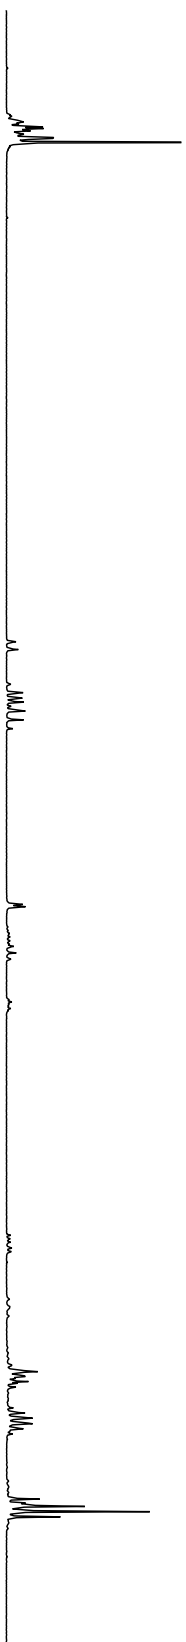

S10 (<sup>1</sup>H-<sup>13</sup>C Coupled HSQC)

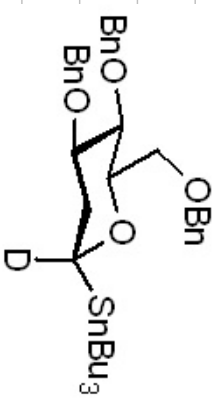

S10

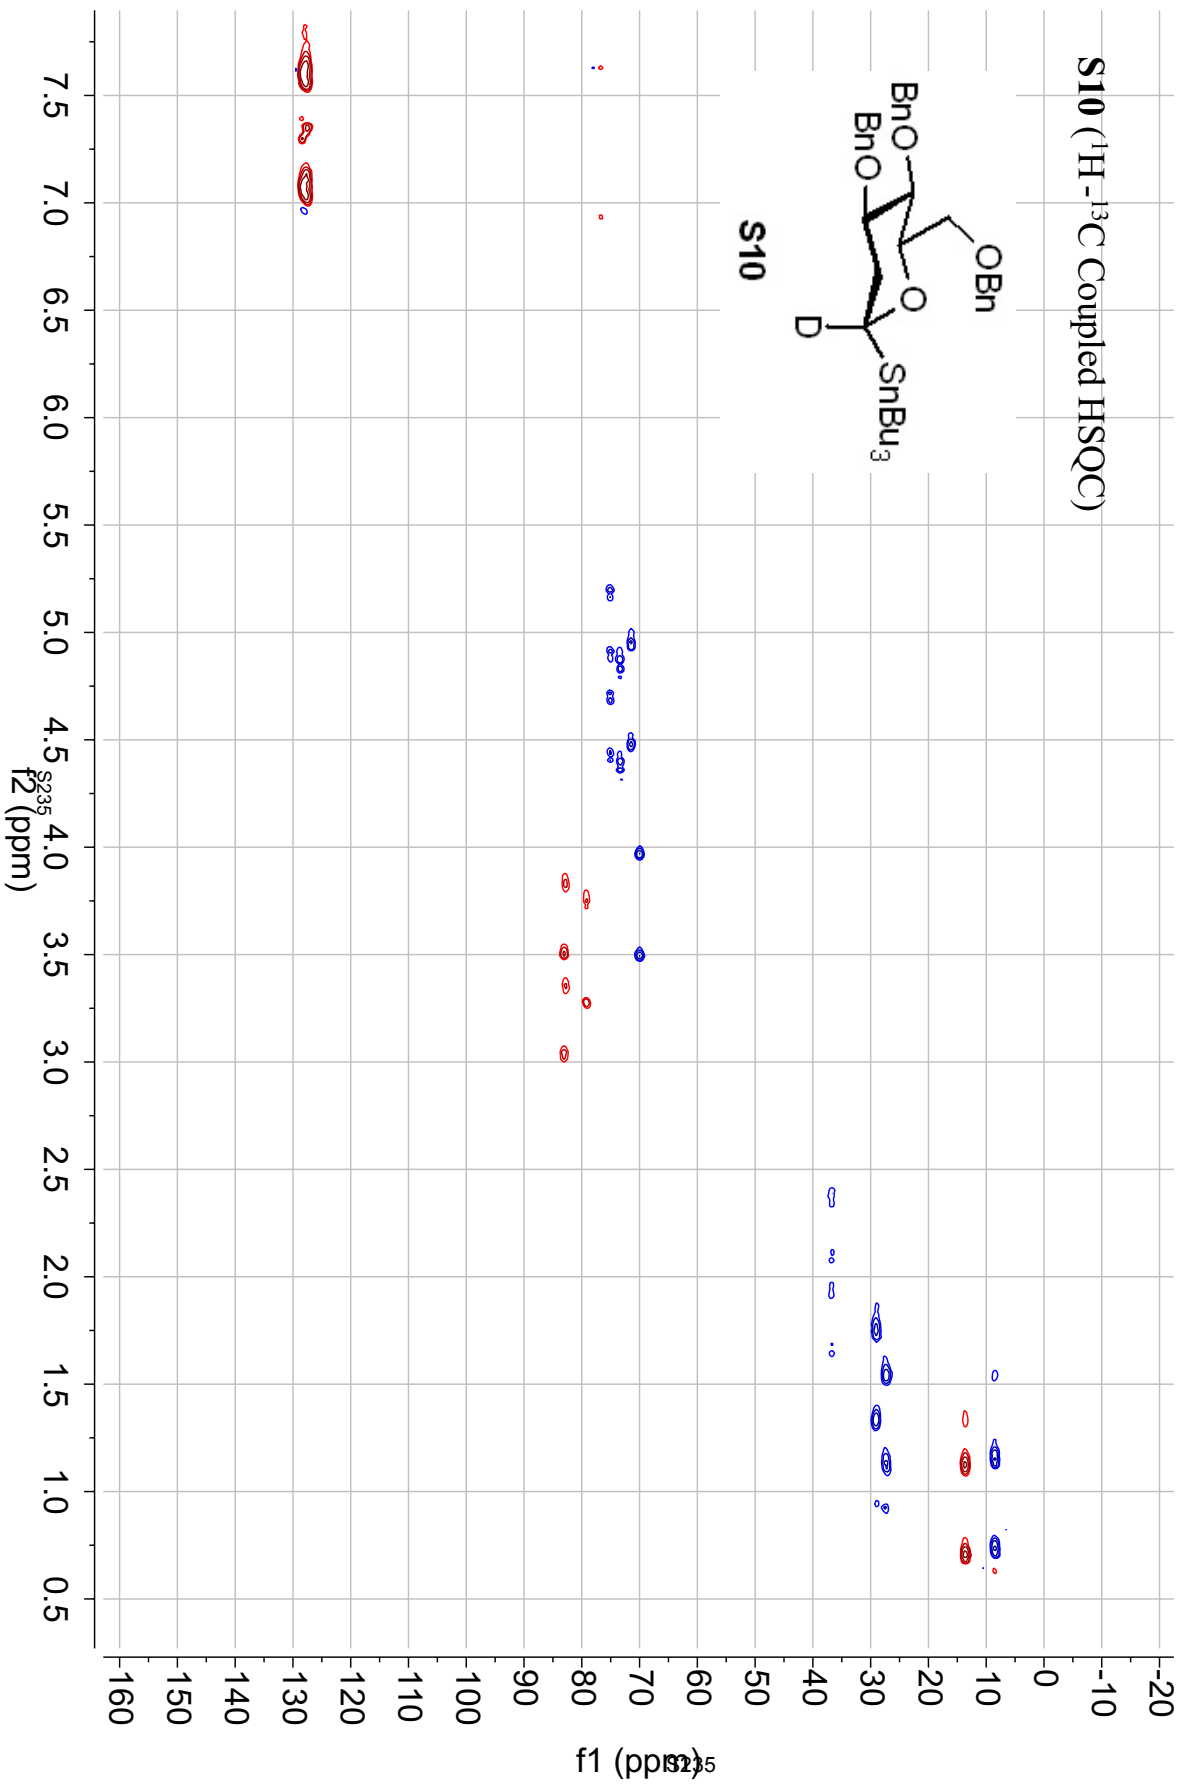

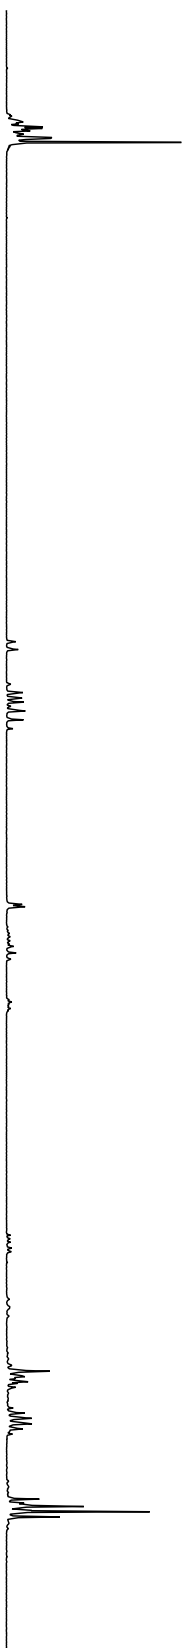

S10 ( $^1\text{H}$ - $^{13}\text{C}$ HSQC)

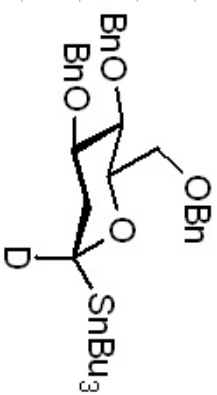

S10

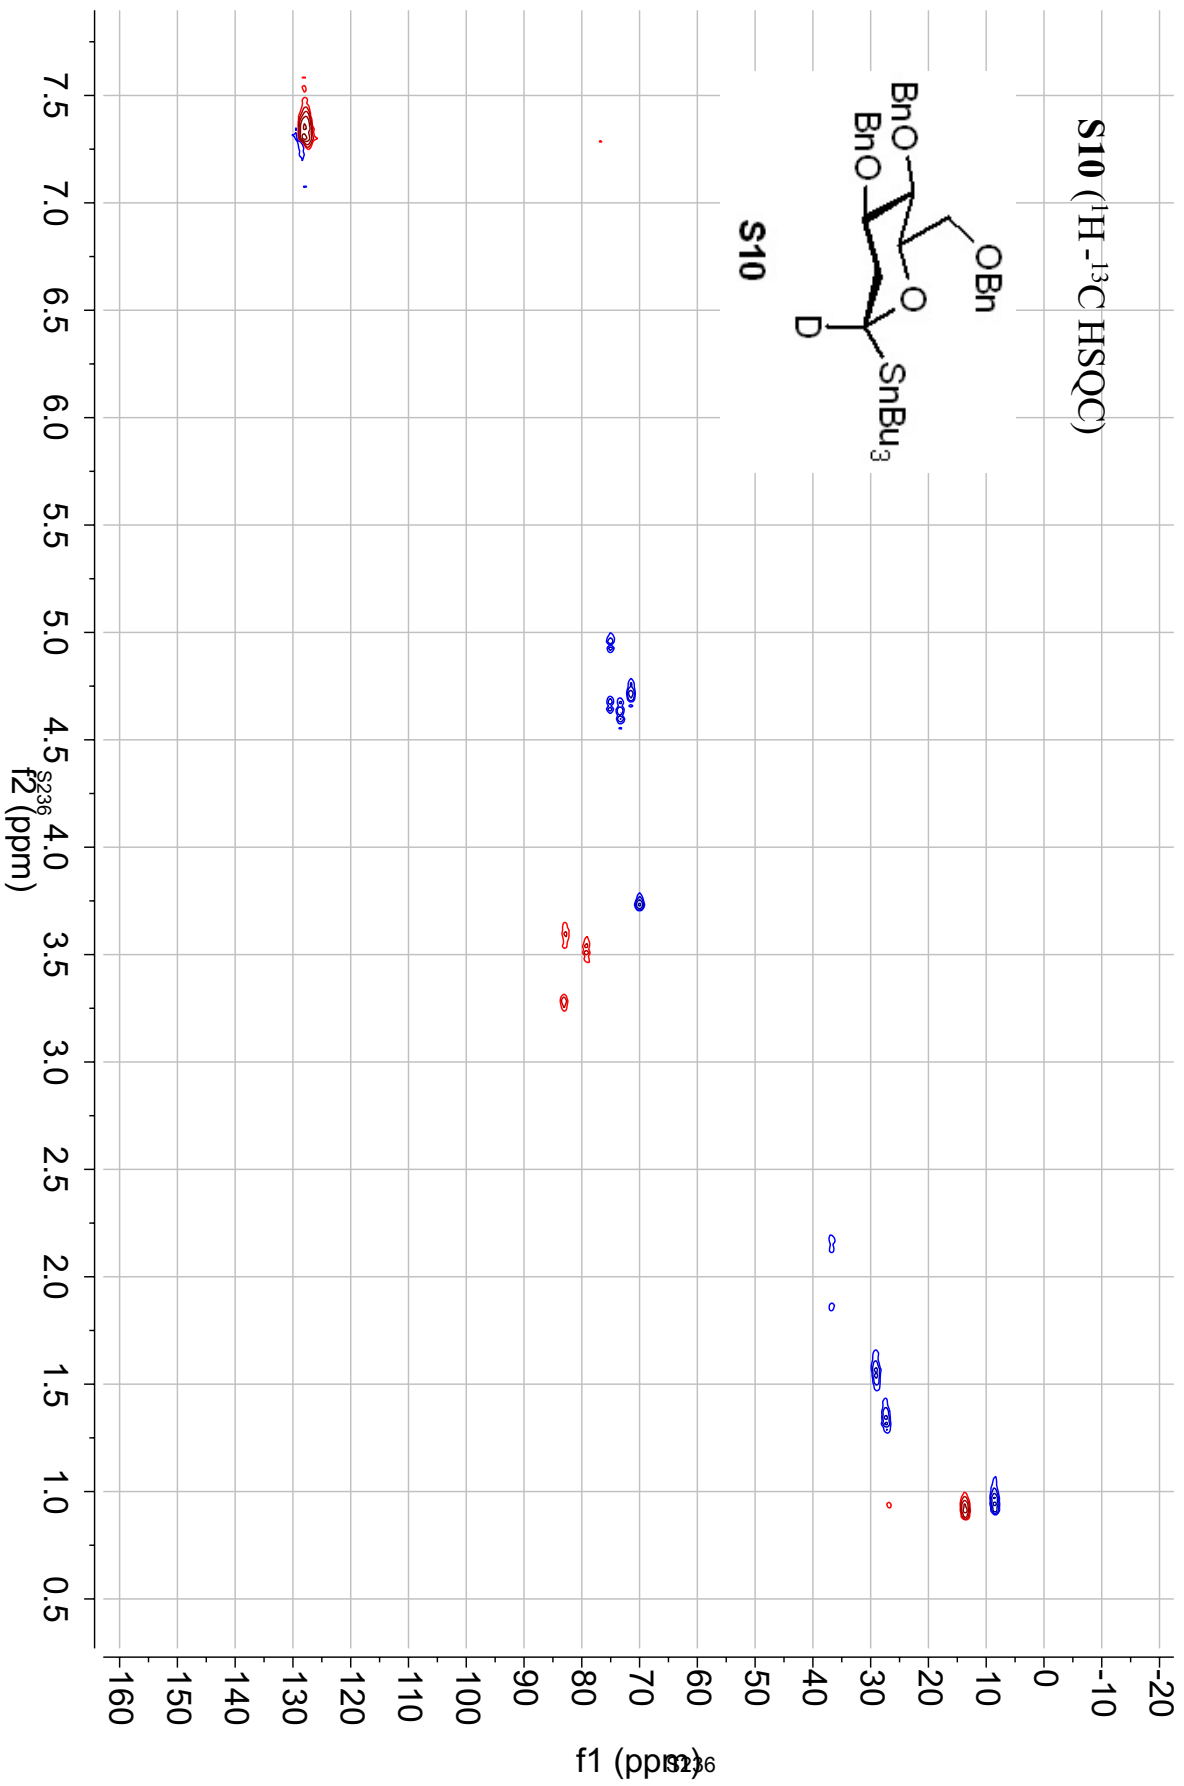

S11 (<sup>1</sup>H NMR, 300MHz, CDCl<sub>3</sub>)

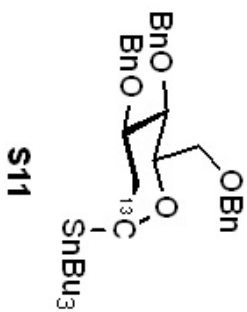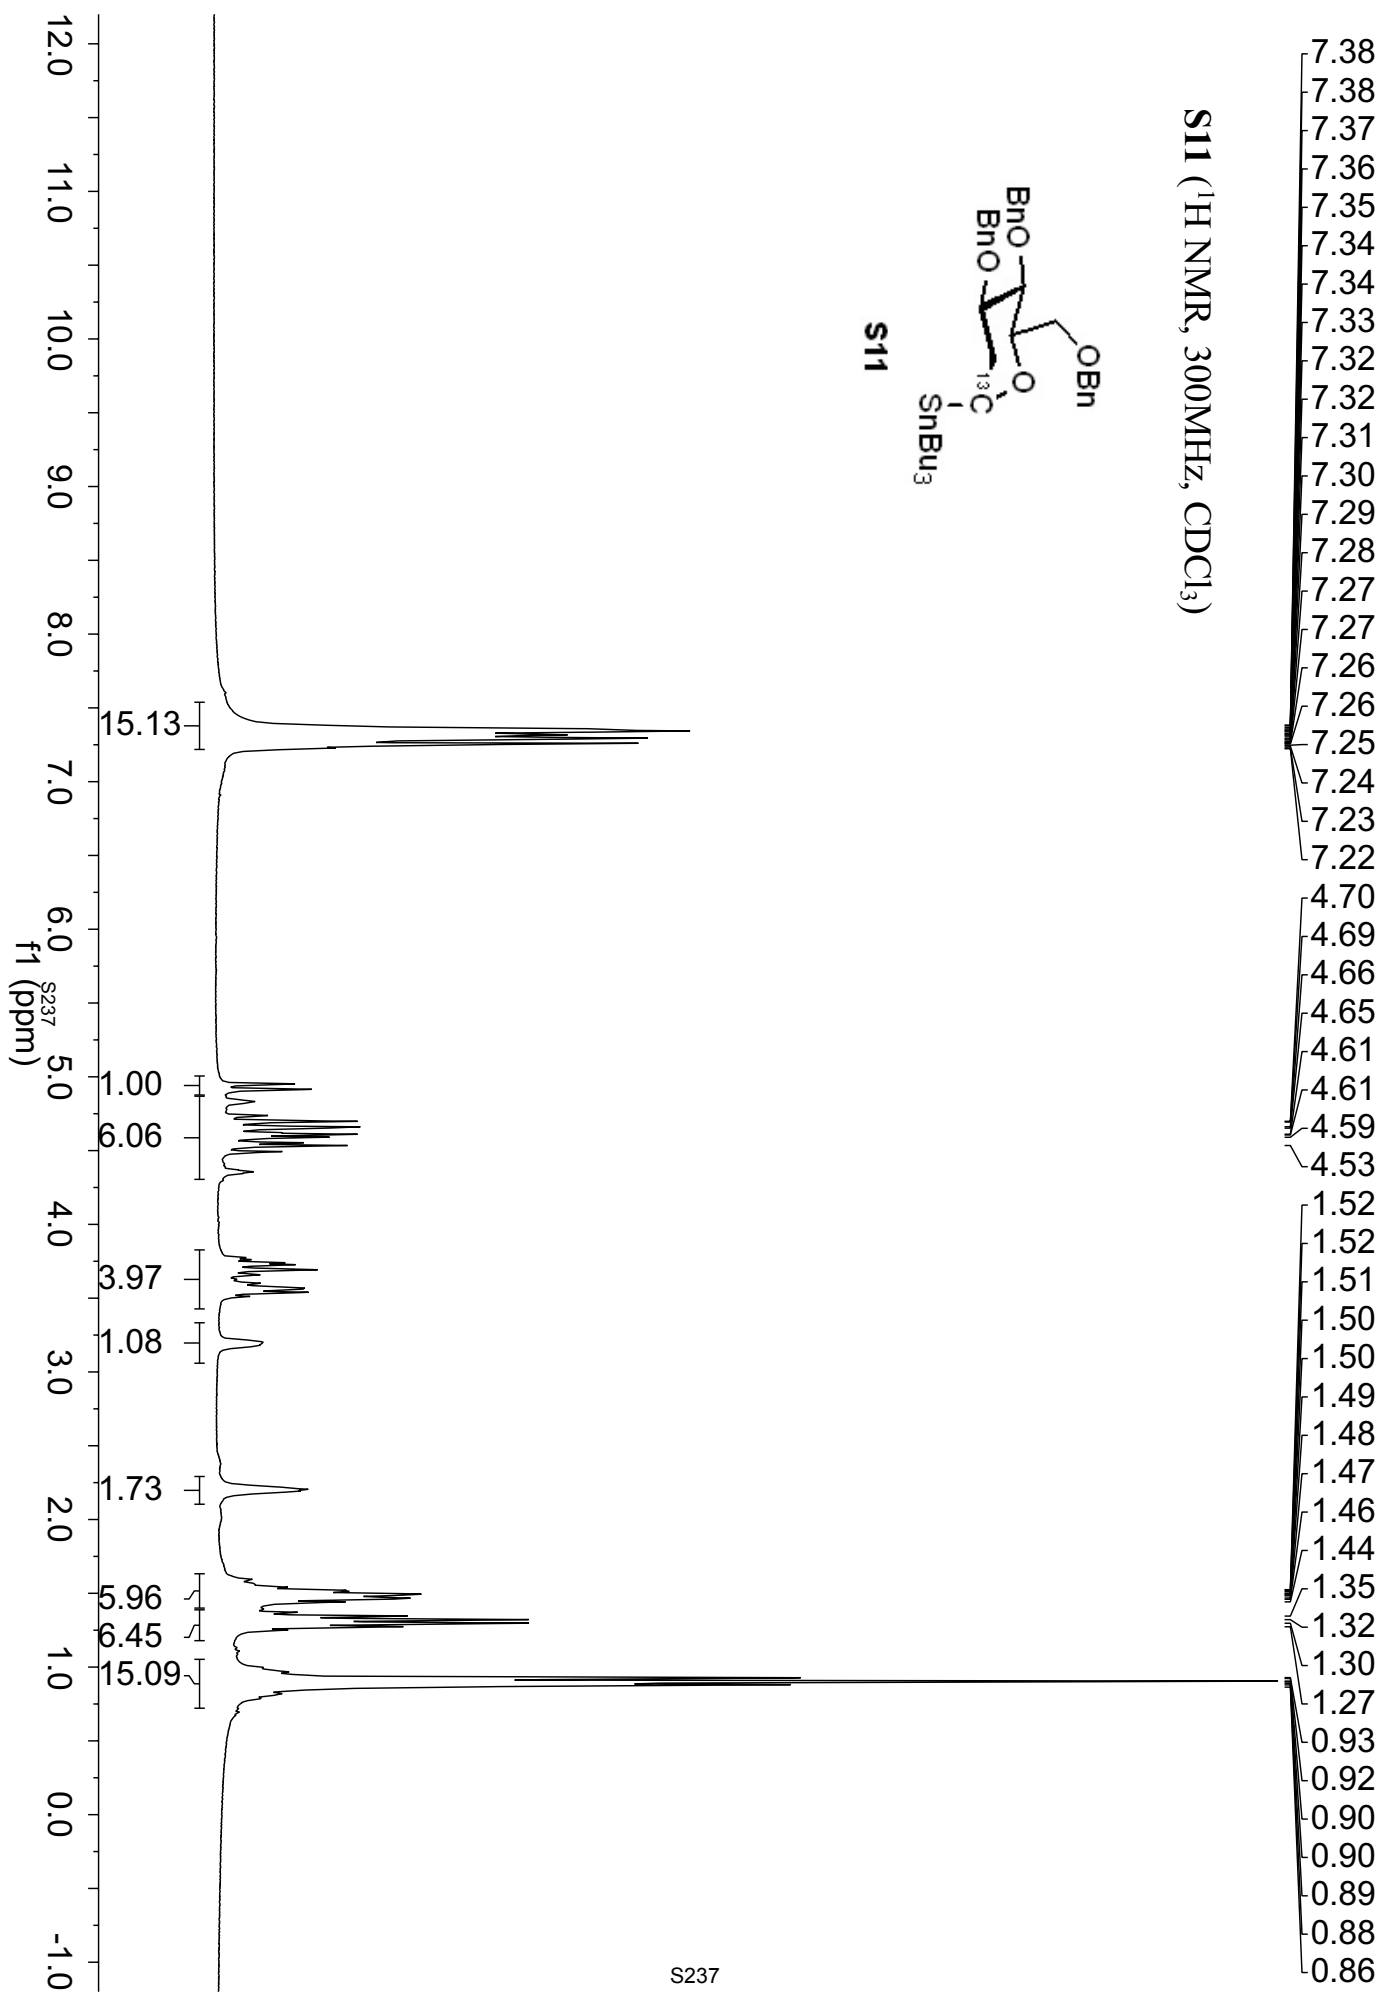

S11 (<sup>13</sup>C NMR, 75MHz, CDCl<sub>3</sub>)

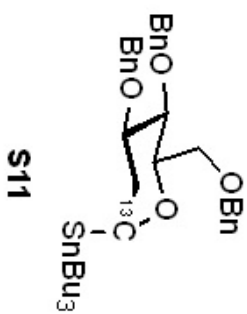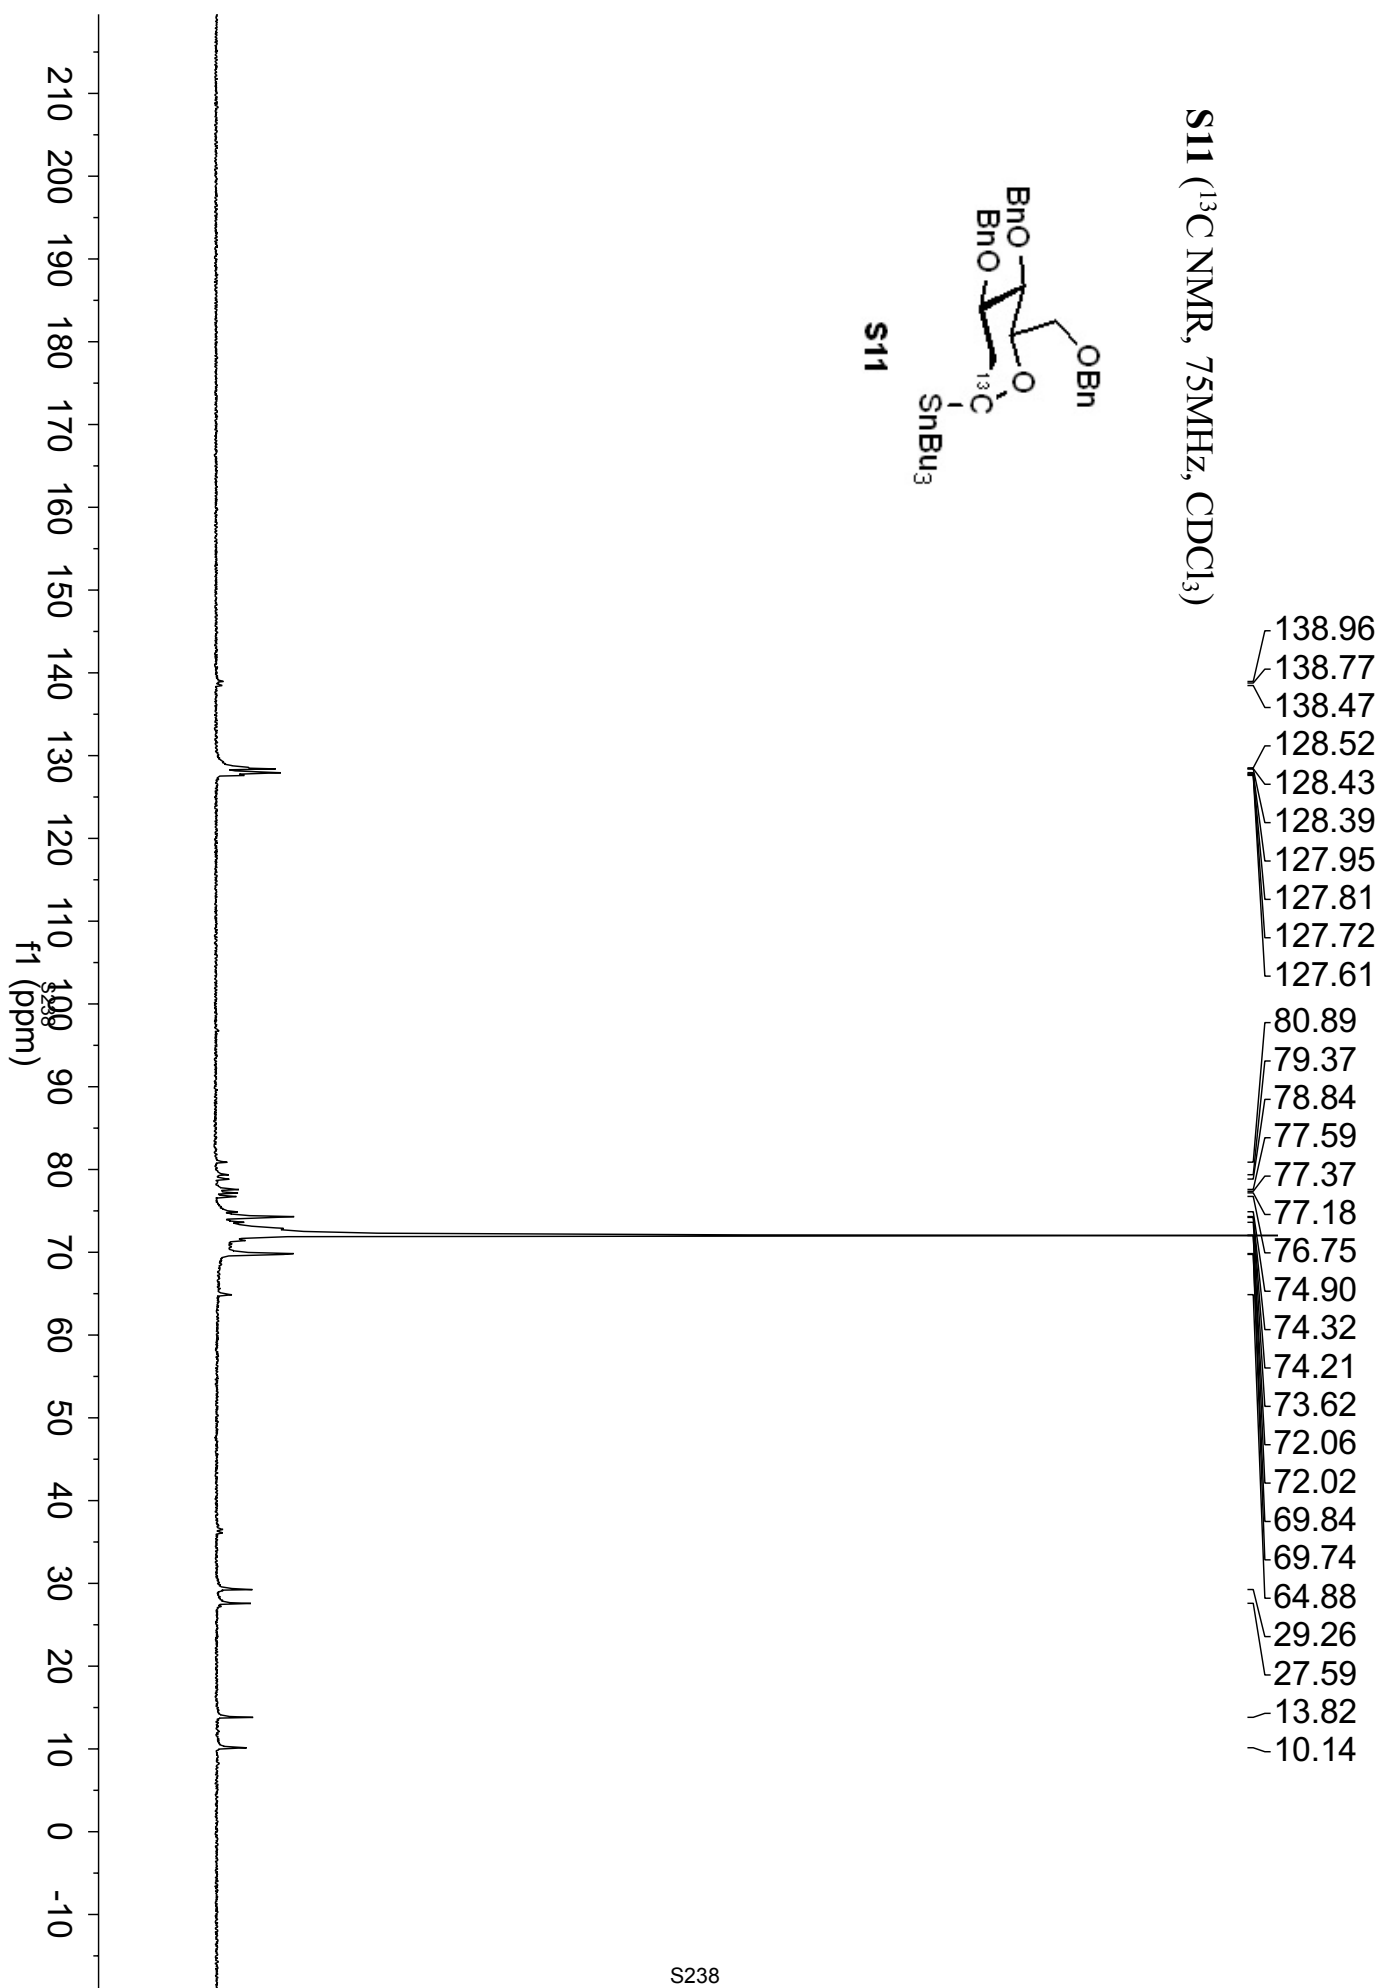

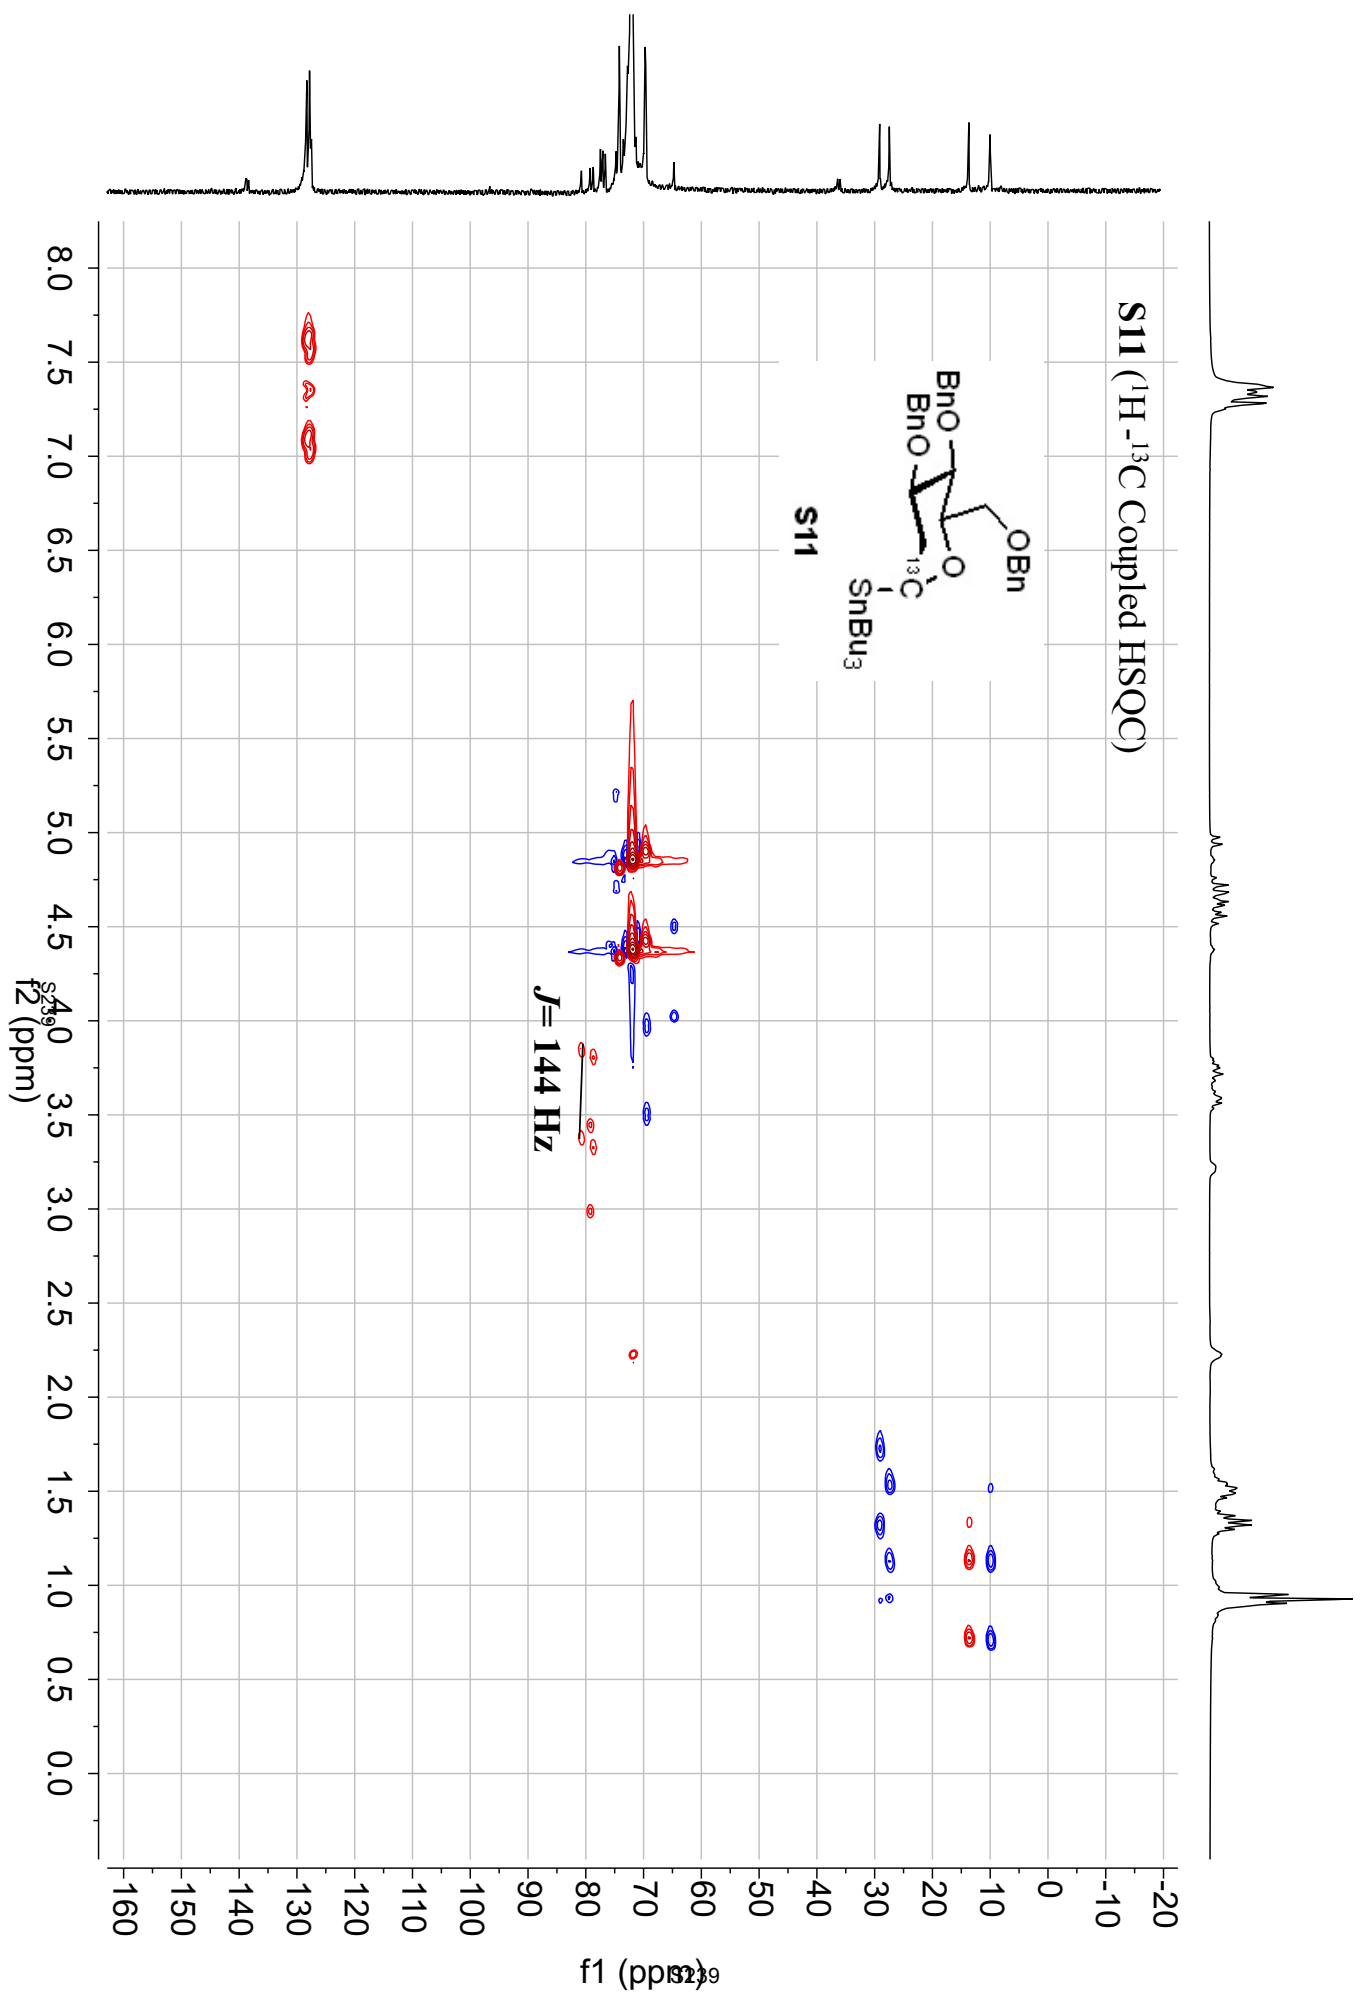

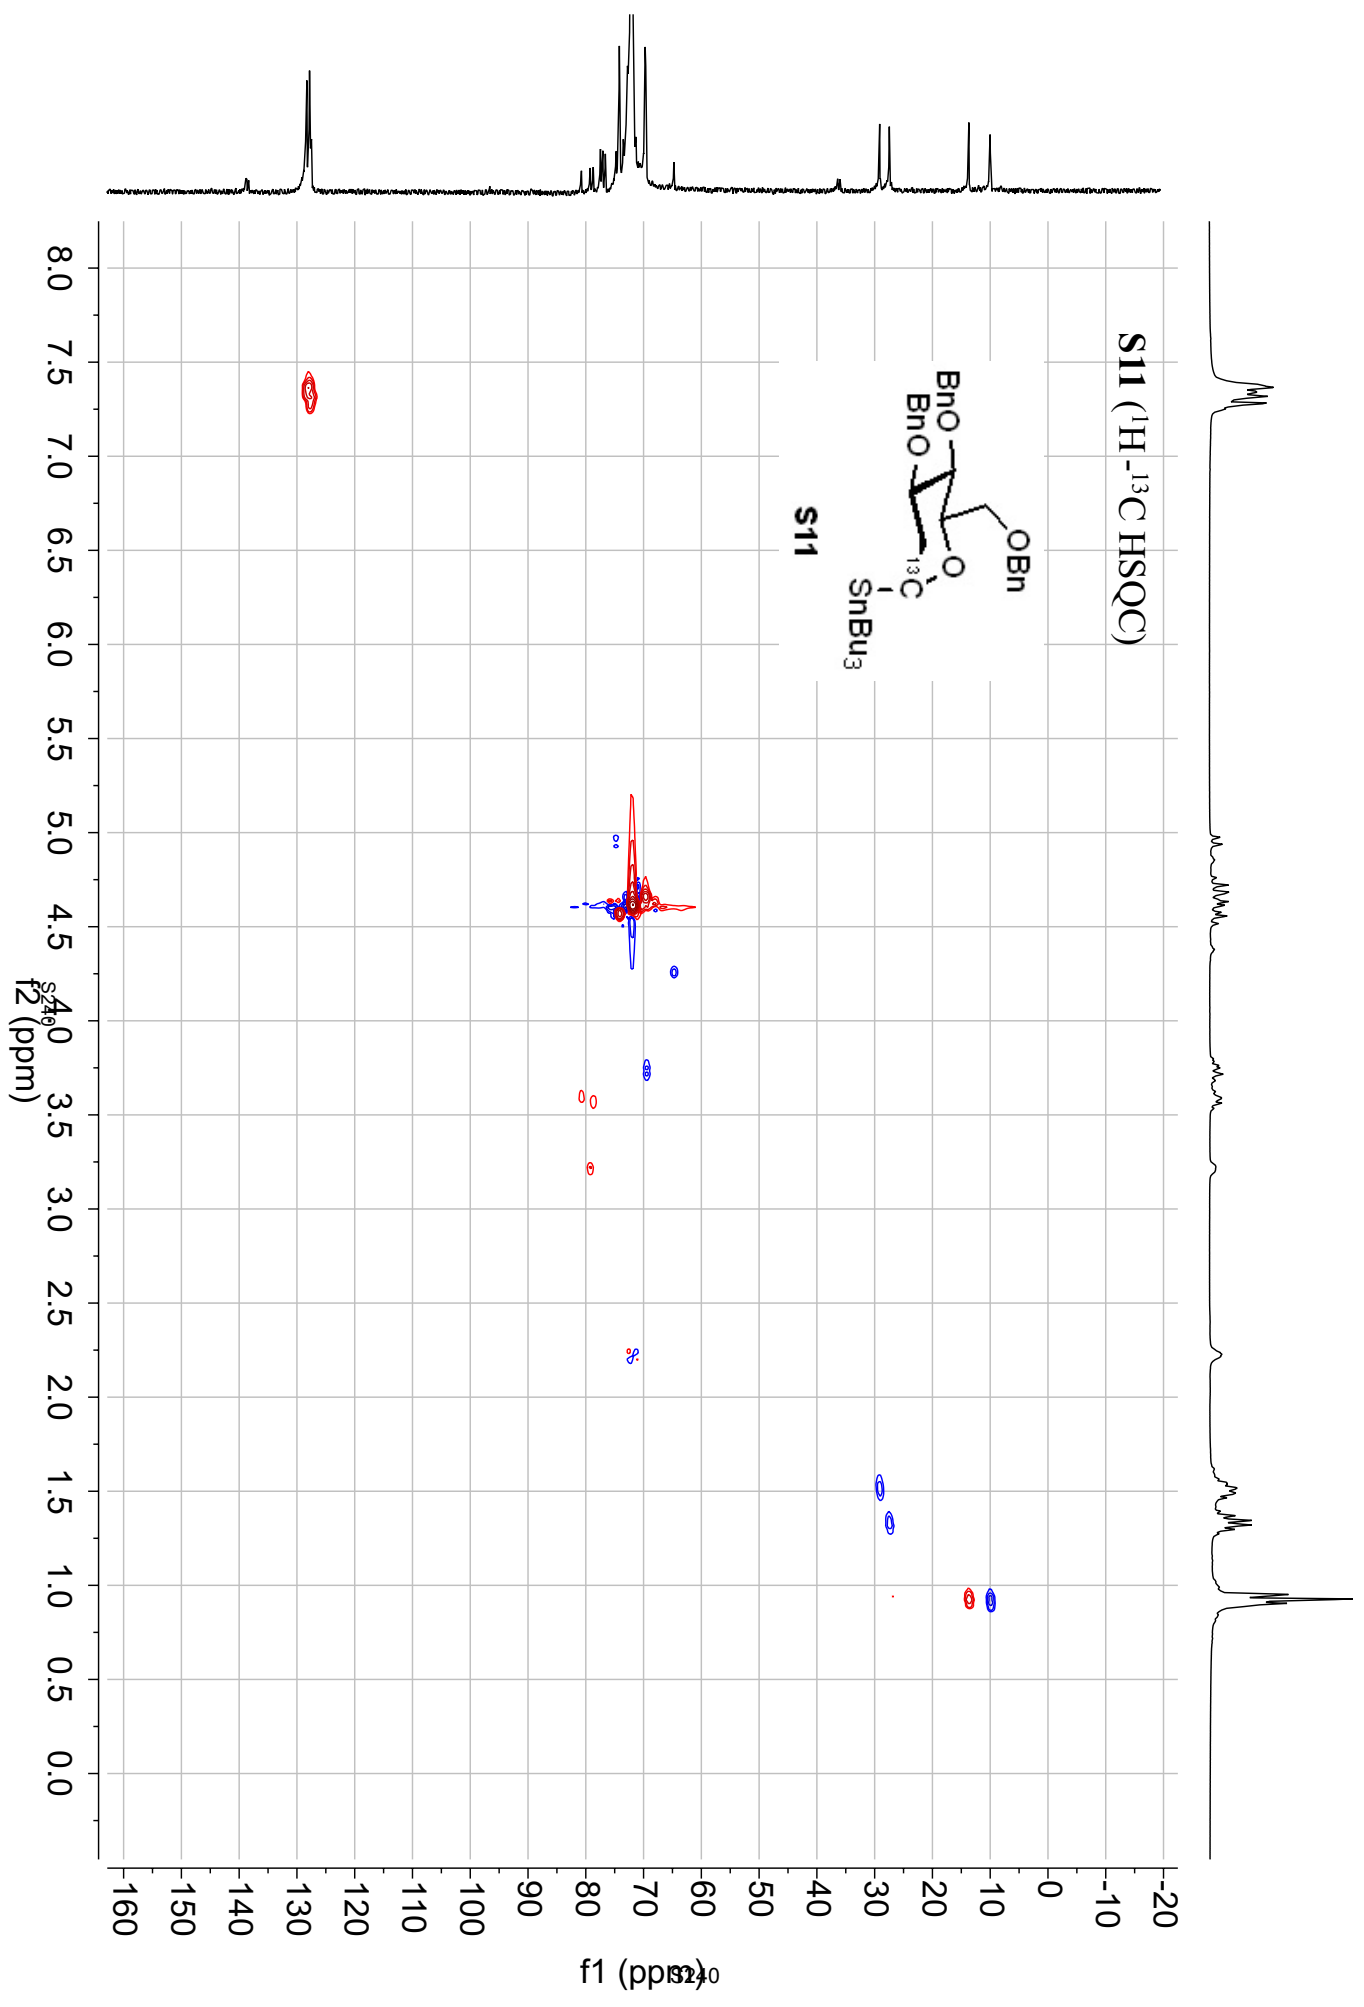



S12 (<sup>1</sup>H NMR, 300MHz, CDCl<sub>3</sub>)

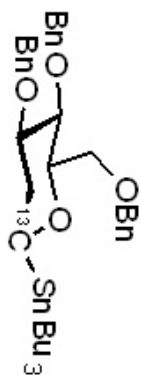

S12

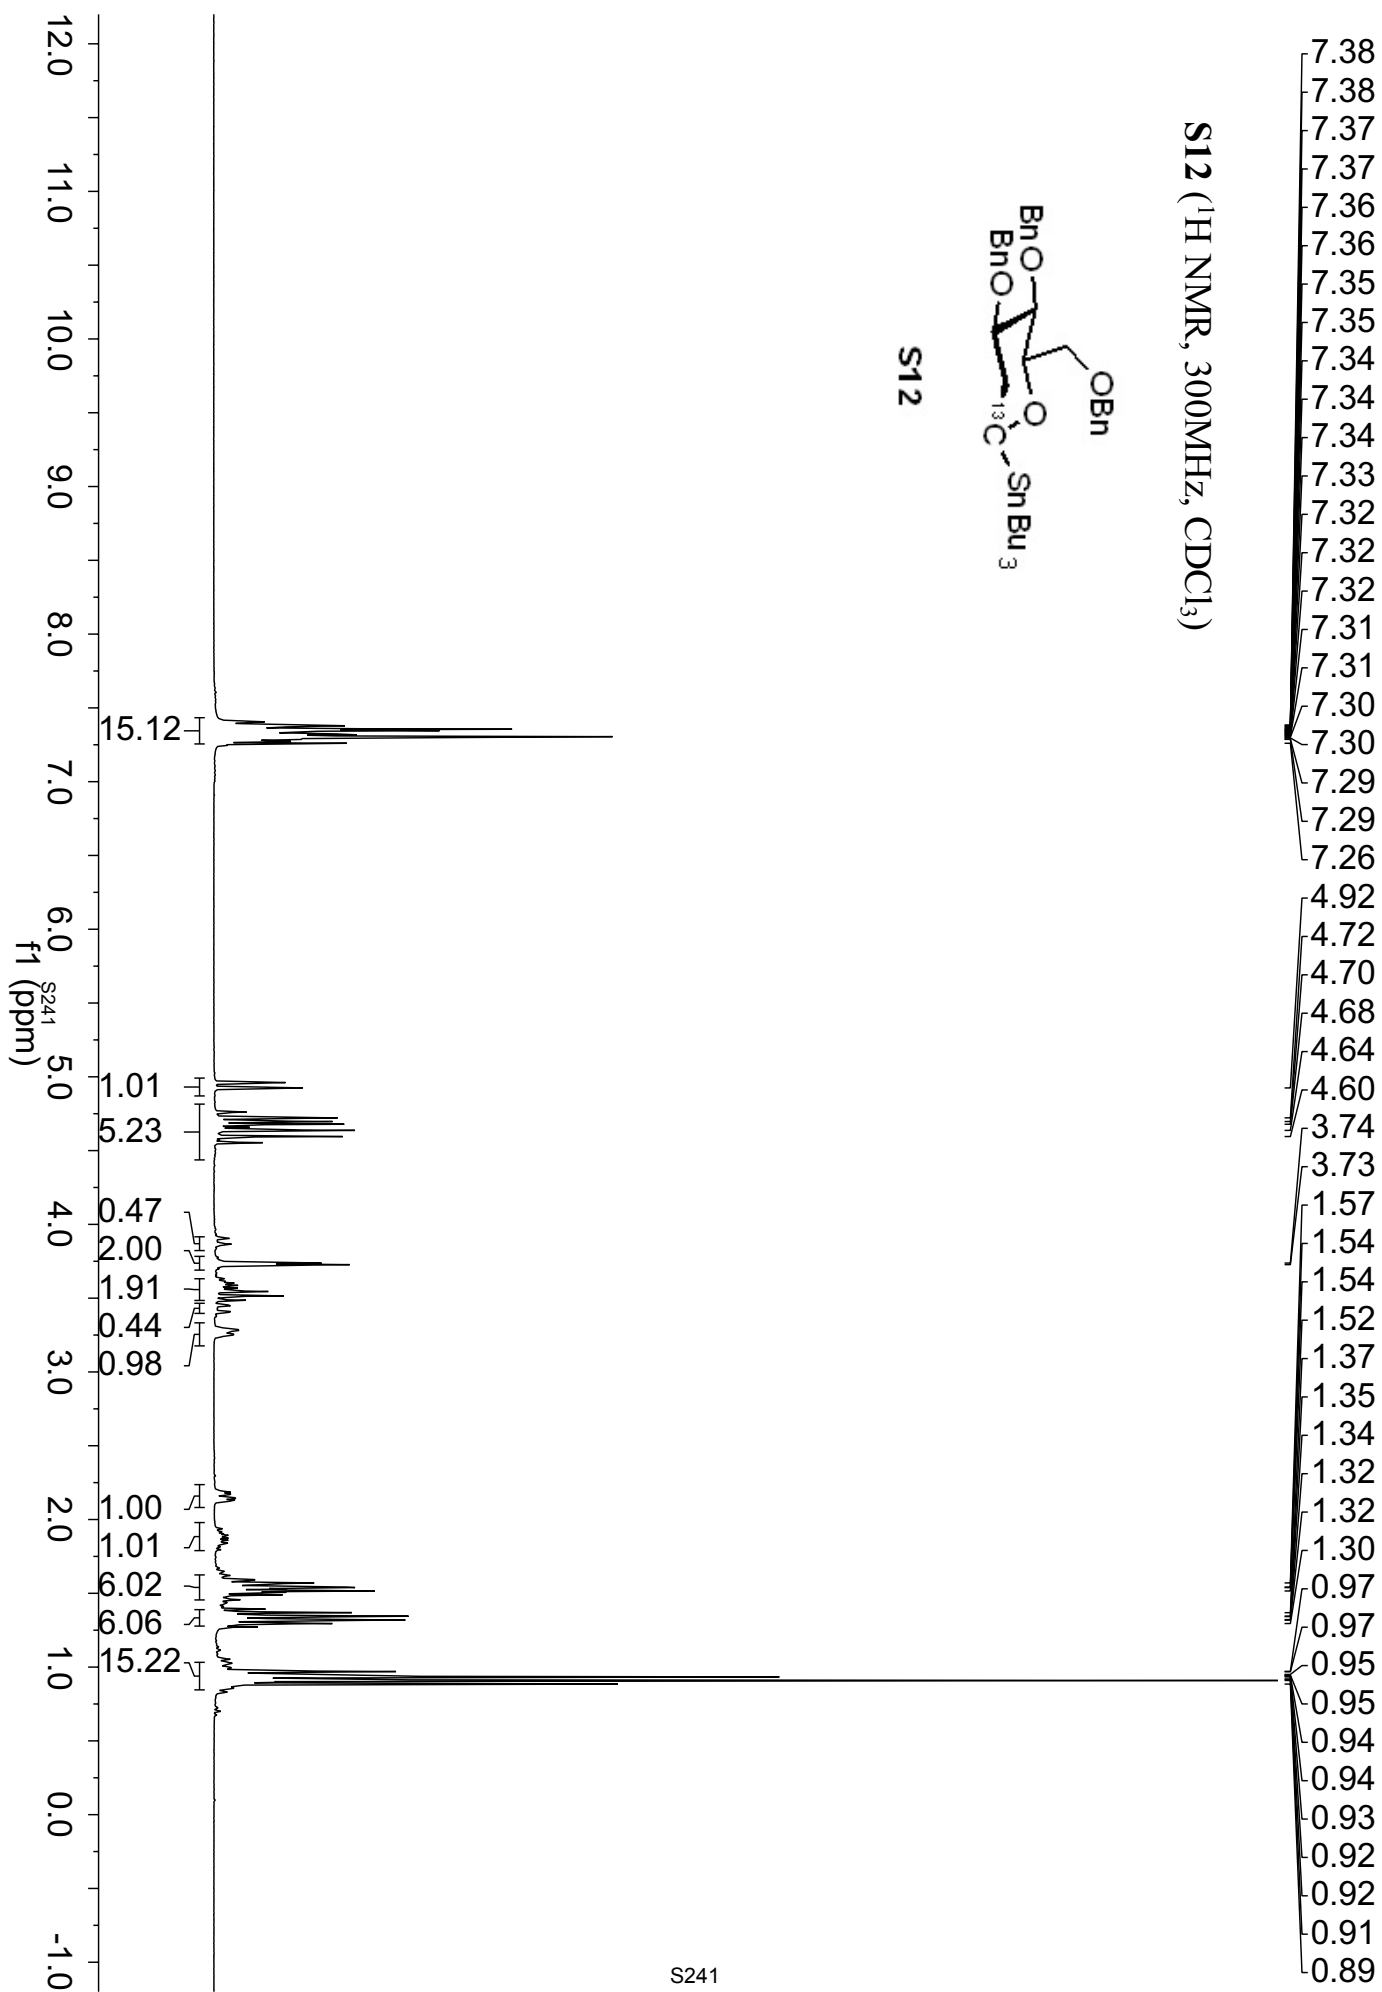



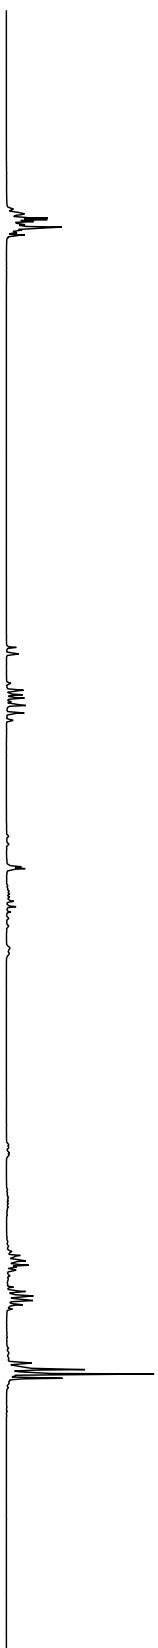

S12 ( $^1\text{H}$ - $^{13}\text{C}$  Coupled HSQC $_3$ )

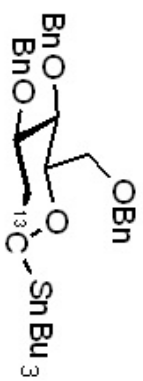

S12

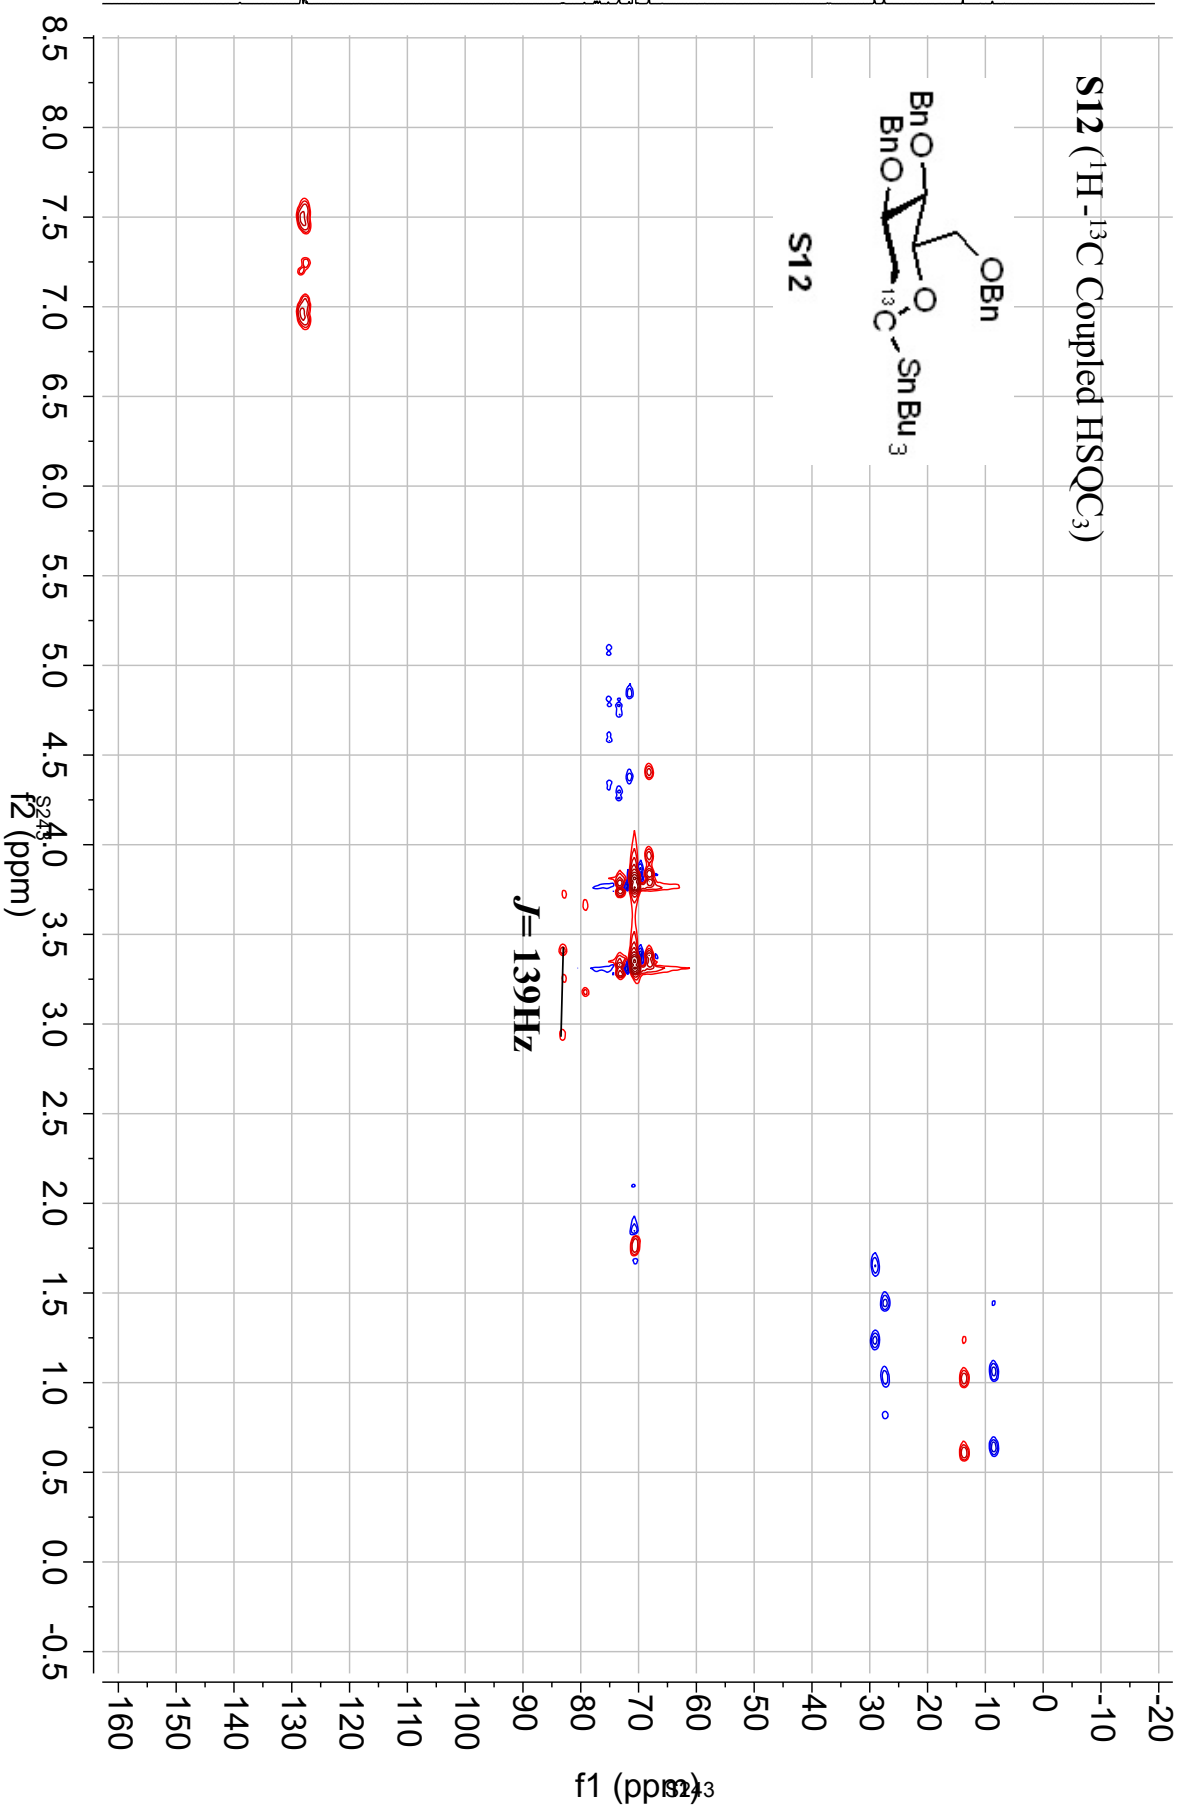

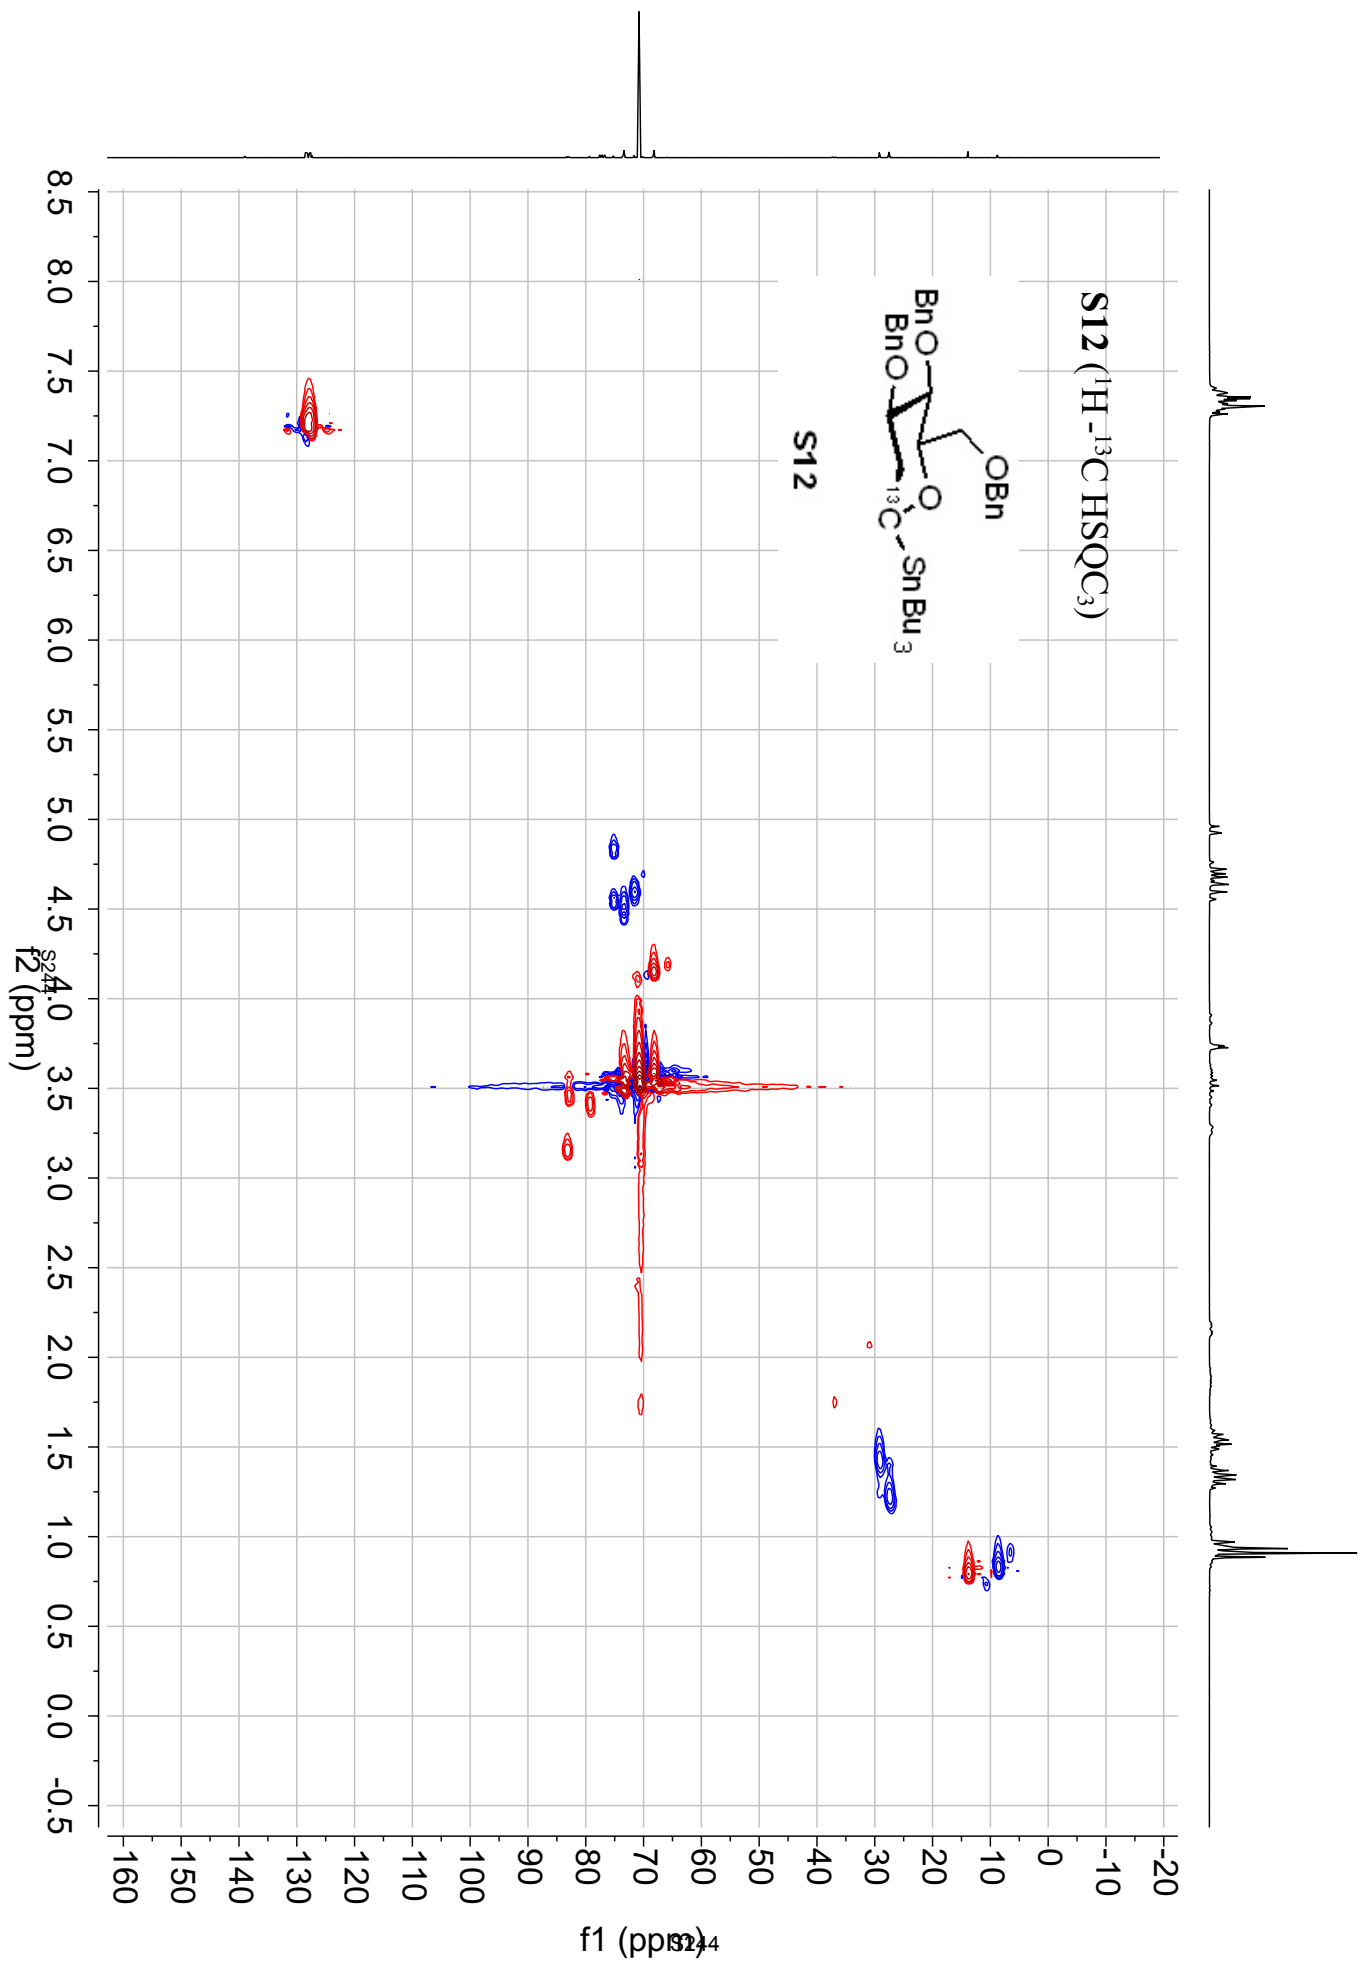

**S13** (<sup>1</sup>H NMR, 300MHz, CDCl<sub>3</sub>)

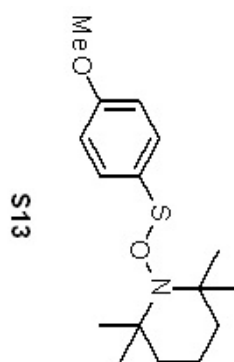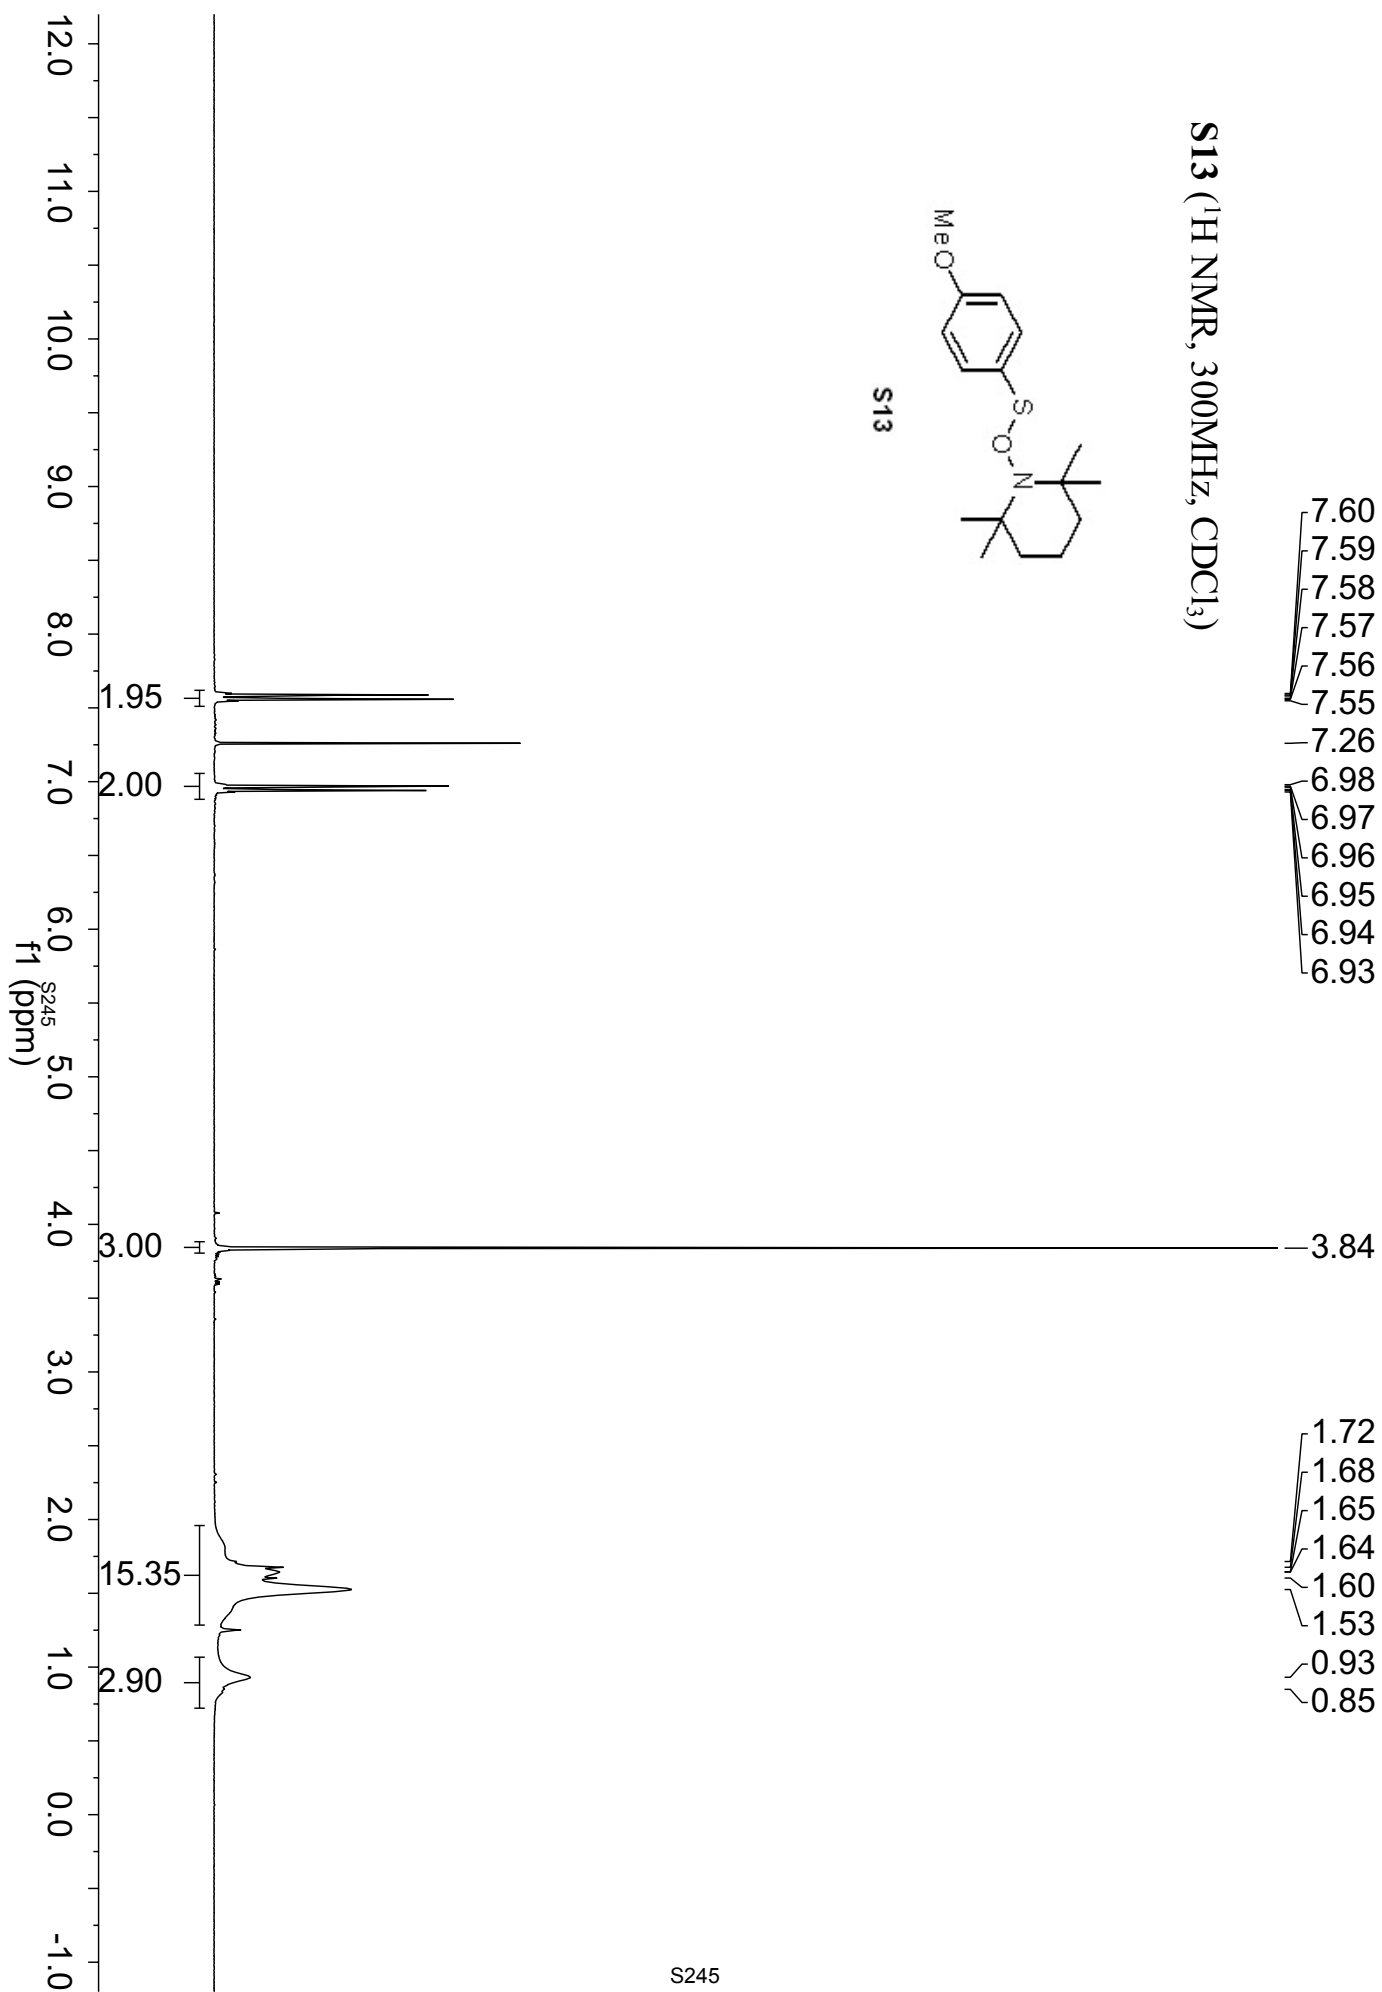

**S13** ( $^{13}\text{C}$  NMR, 75MHz,  $\text{CDCl}_3$ )

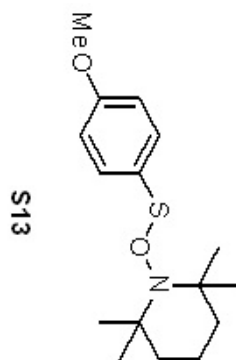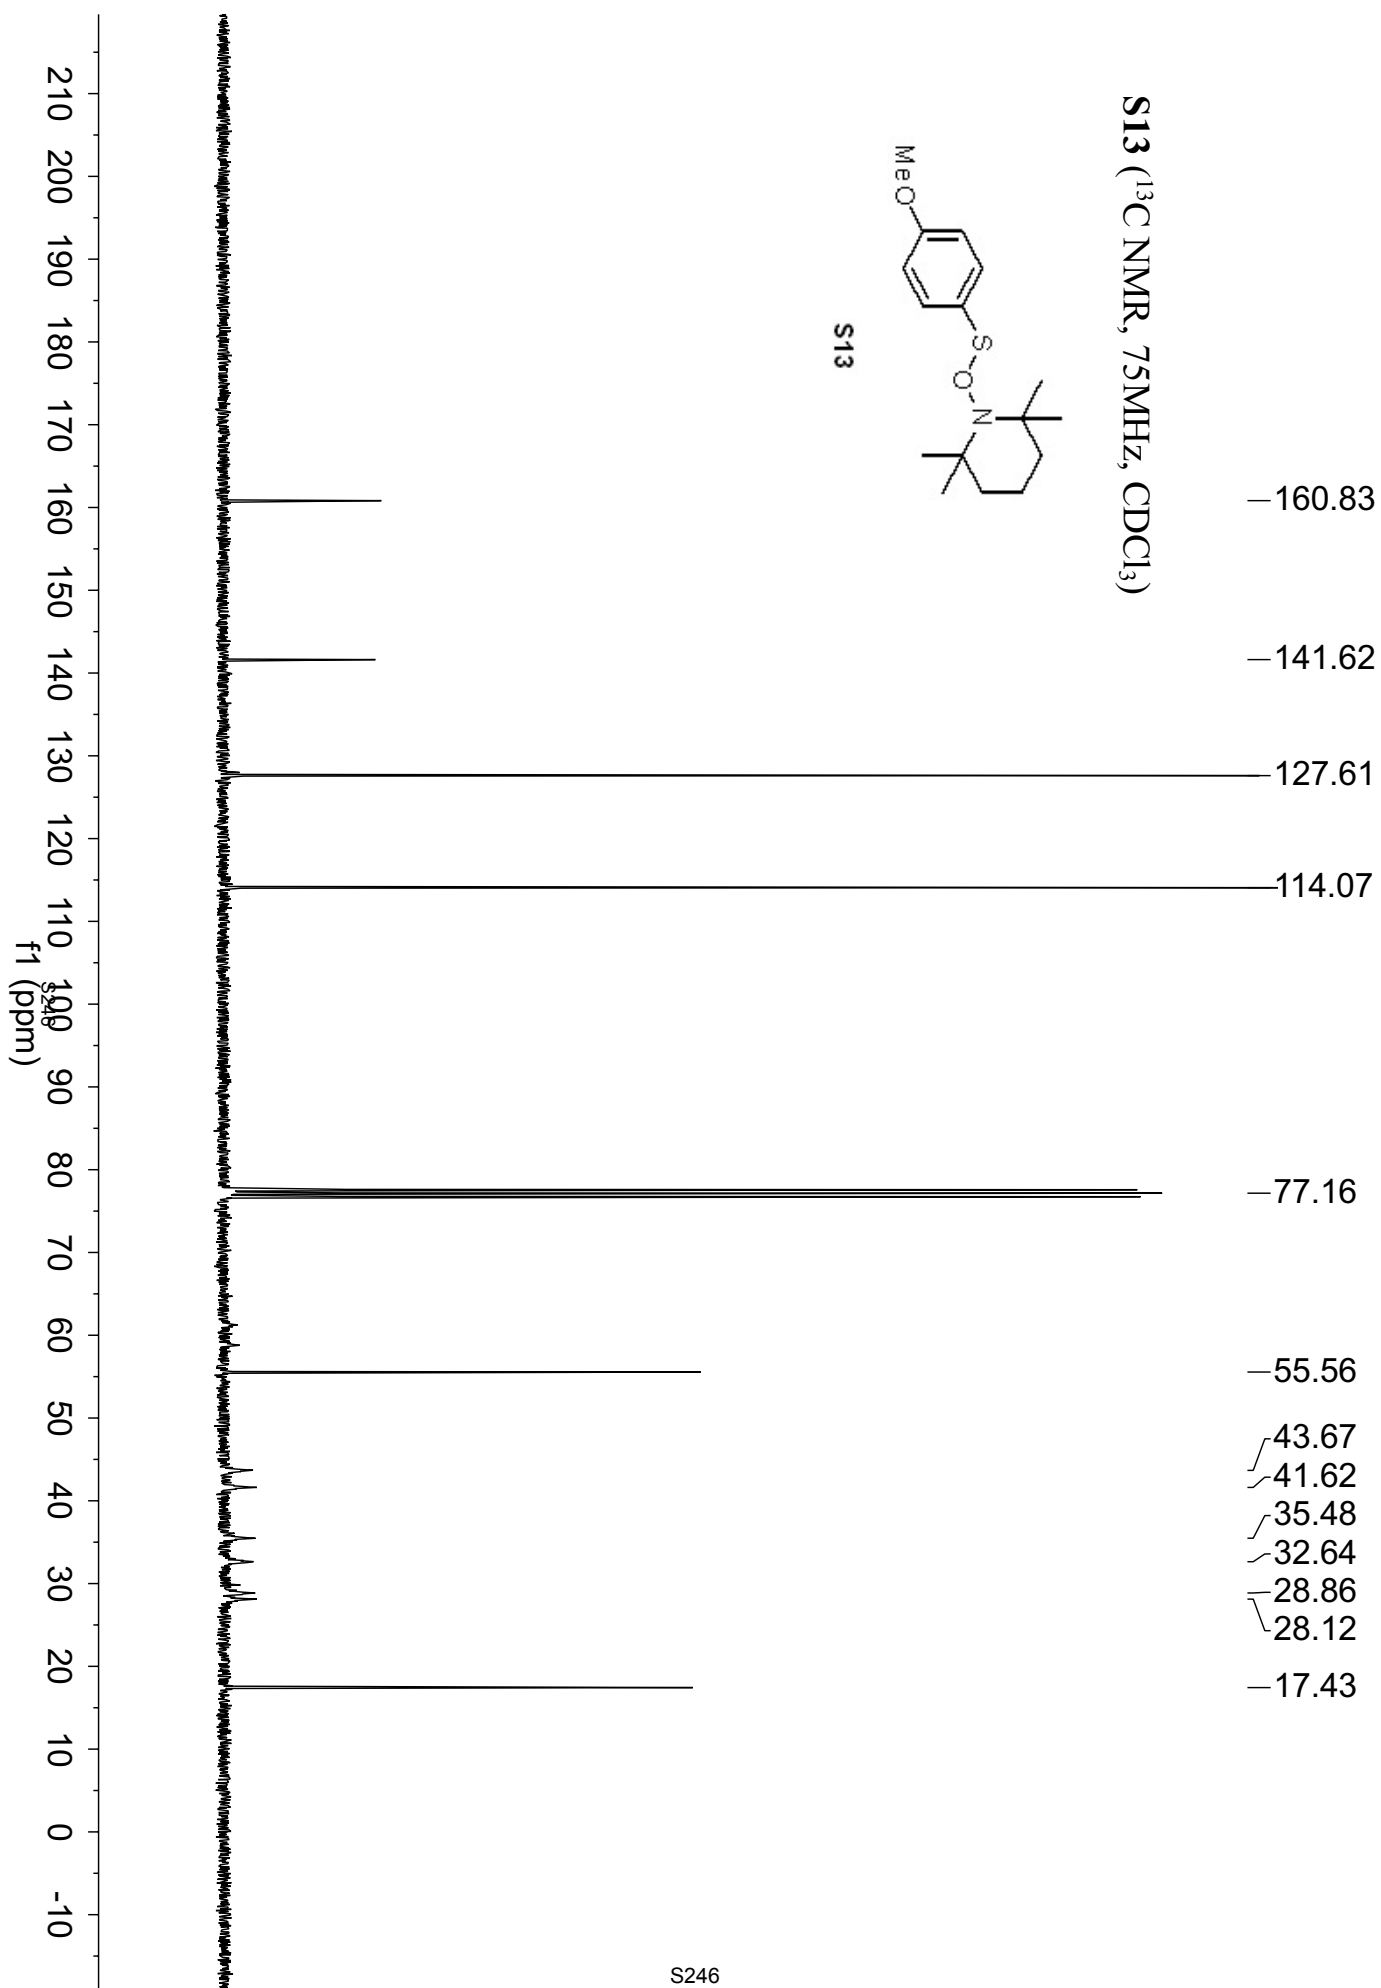

Supplement: NIHMS1845417-supplement-Supplementary_Materials.pdf [file NIHMS1845417-supplement-Supplementary_Materials.pdf]
